# Supplementary material for: Meiosis Drives Extraordinary Genome Plasticity in the Haploid Fungal Plant Pathogen Mycosphaerella graminicola
Source: PubMed Central journal article supplement (PMC2689623; doi:10.1371/journal.pone.0005863), 2009-06-10

# A

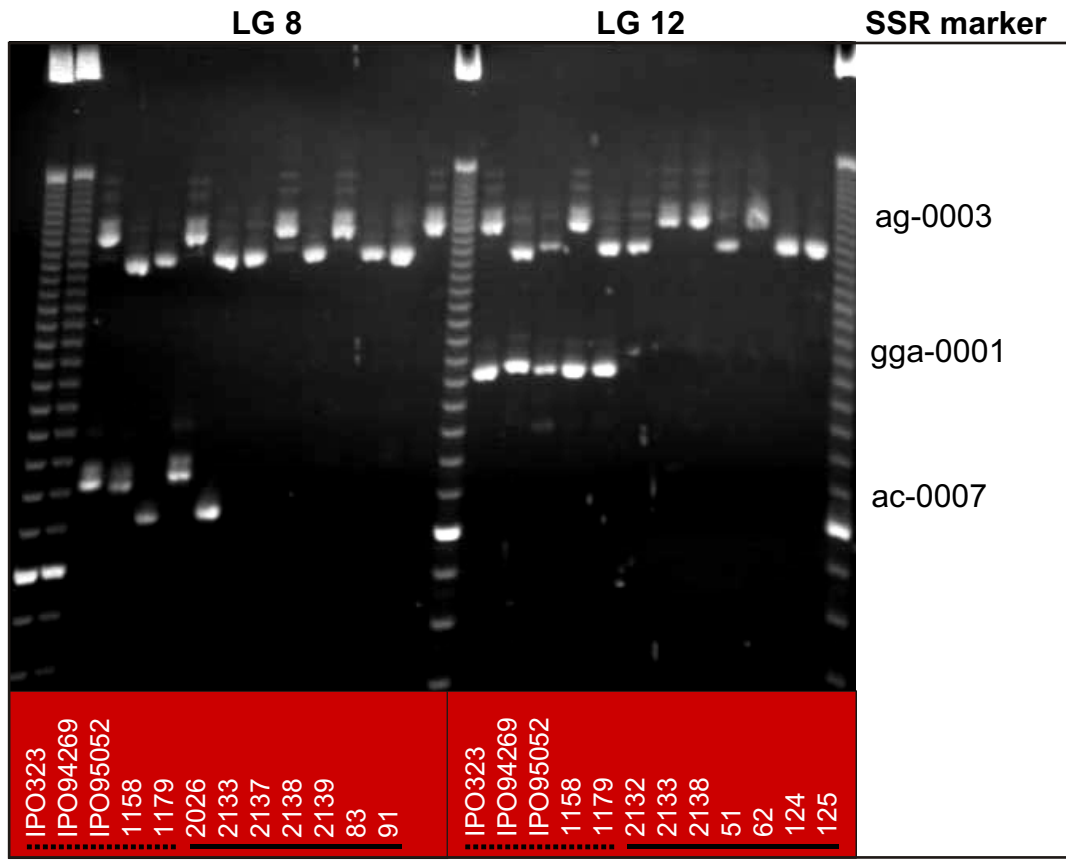

**B**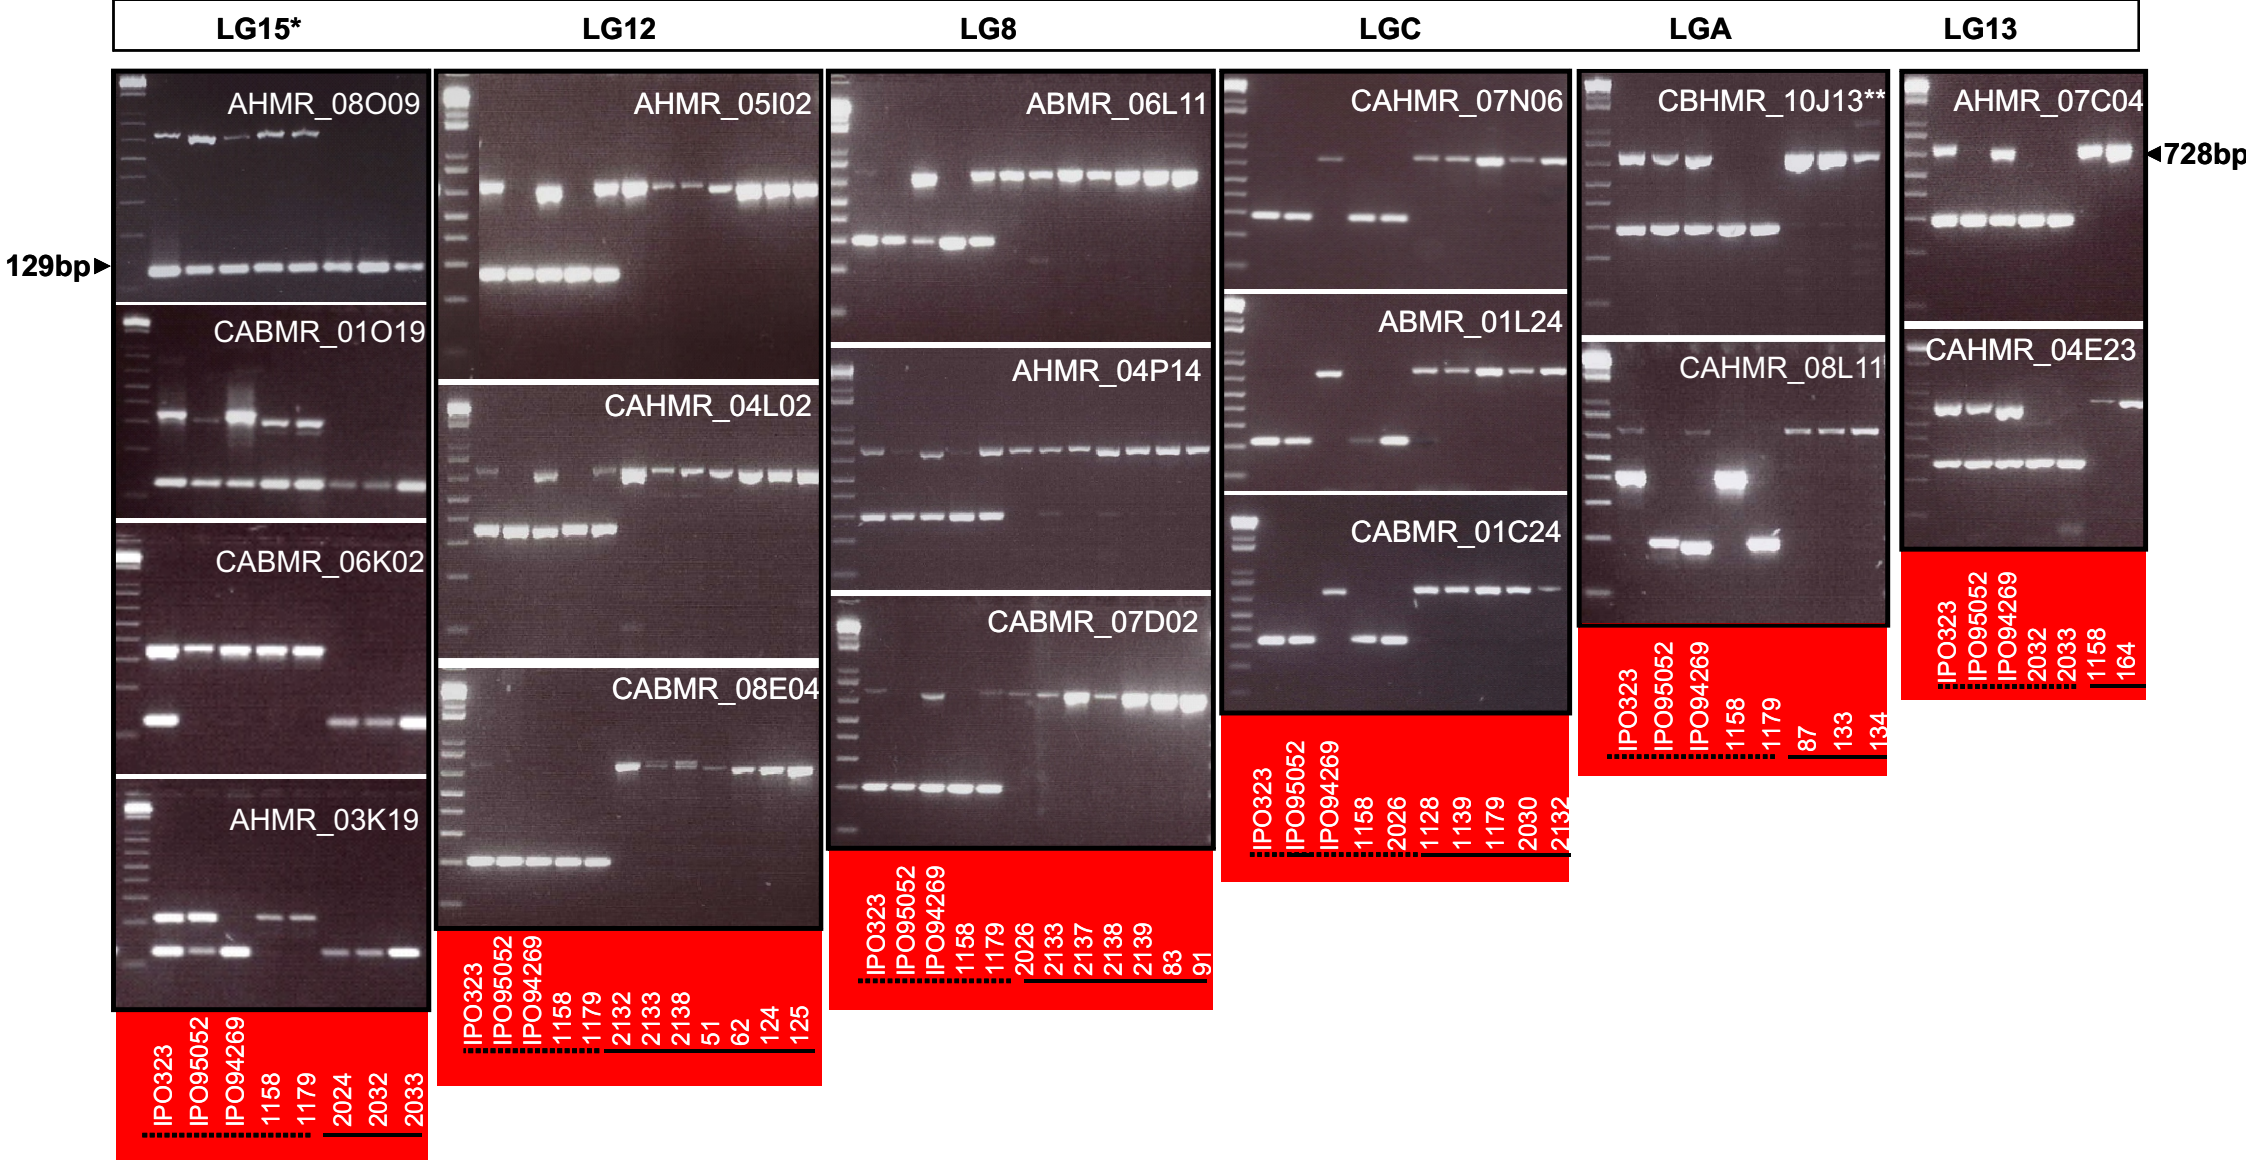



**C**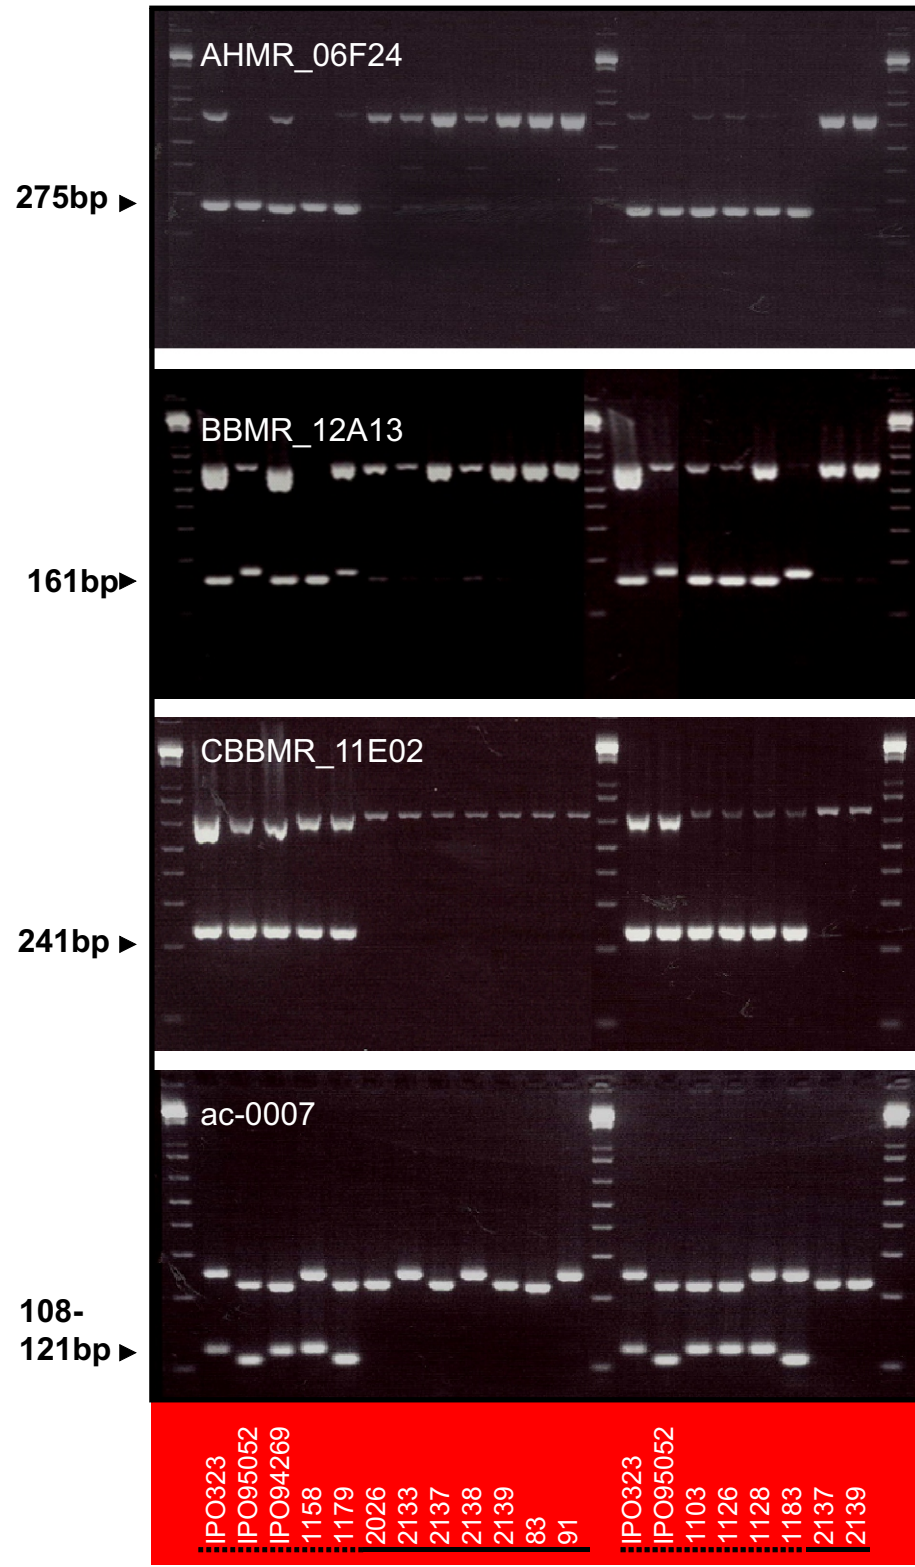**LG8**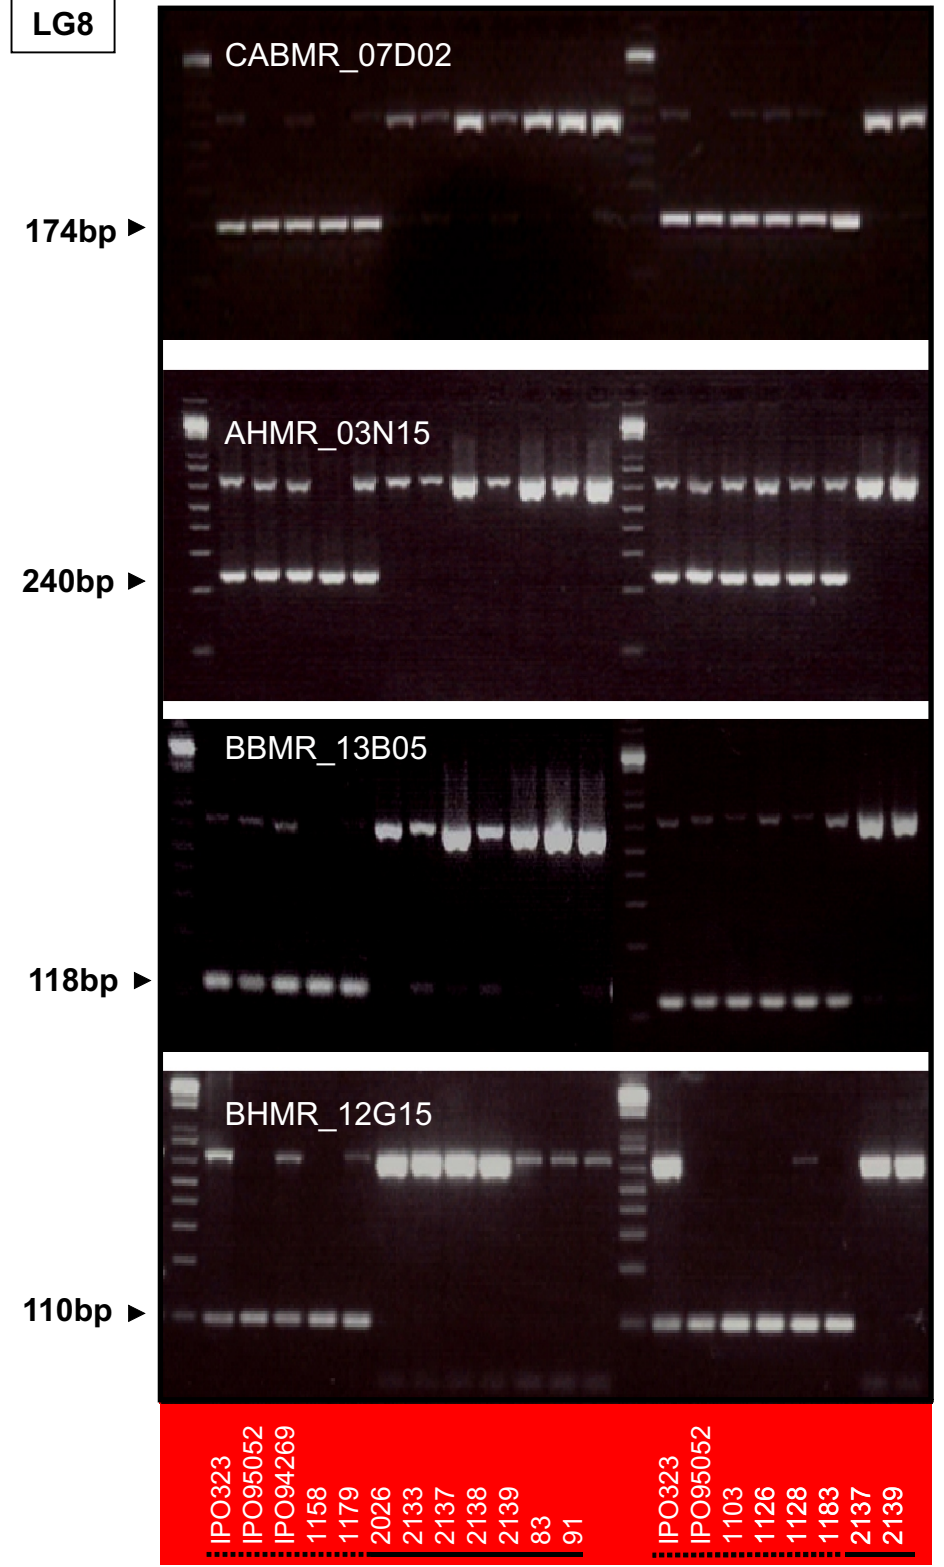

Supplement: pone.0005863.s004.pdf [file pone.0005863.s004.pdf]
