# Supplementary material for: Meiosis Drives Extraordinary Genome Plasticity in the Haploid Fungal Plant Pathogen Mycosphaerella graminicola
Source: PLoS One. 2009 Jun 10;4(6):e5863. doi: 10.1371/journal.pone.0005863 (PMC2689623; doi:10.1371/journal.pone.0005863)
Supplement: Table S10 — Scoring tables (3.33 MB XLS) [file pone.0005863.s014.xls]

## Sheet: Cross IPO323 x IPO94269
Loci 323/94269	1	10	12	14	22	23	24	29	40	47	50	51	62	68	73	83	84	87	88	90	91	94	95	100	109	111	115	116	118	119	124	125	126	131	132	134	136	137	142	144	147	157	158	160	164	167	173	174	176
ABMR_01A07	a	a	a	a	b	b	b	b	b	a	b	a	a	b	b	b	a	b	b	a	a	a	b	b	a	a	a	b	b	b	a	b	a	b	b	a	b	a	a	a	b	b	b	b	b	b	b	b	a
ABMR_01A09	b	a	b	b	b	a	a	b	a	a	b	a	b	b	a	b	b	a	a	a	a	a	a	a	b	b	a	a	a	a	a	a	b	a	b	a	a	a	b	a	b	a	a	a	b	b	b	a	b
ABMR_01A19	a	b	a	a	a	a	b	b	b	b	b	a	a	a	a	b	a	b	b	a	a	b	-	b	b	a	b	a	a	a	b	b	b	a	b	a	b	a	a	a	b	a	b	a	a	a	b	a	b
ABMR_01B01	a	b	a	a	b	b	a	b	a	b	a	a	a	b	a	a	b	-	a	a	b	a	a	a	b	a	b	a	b	a	b	a	a	a	a	b	b	b	b	a	a	b	a	b	b	a	-	-	-
ABMR_01C09	a	b	b	b	a	a	a	b	b	a	b	a	b	b	b	a	b	b	a	a	b	b	a	b	b	a	a	b	b	a	b	b	a	a	a	b	a	a	b	a	a	b	b	b	b	a	a	b	a
ABMR_01C23	b	b	b	b	b	a	b	a	a	b	b	a	a	a	b	b	a	b	b	a	b	a	b	b	a	a	a	b	b	a	b	a	a	a	b	a	a	a	a	b	b	b	a	b	b	a	a	a	b
ABMR_01G03	b	a	b	a	a	a	a	b	a	b	a	b	b	b	b	a	b	b	a	a	b	b	a	b	a	a	a	b	b	b	b	a	a	a	b	a	a	a	b	a	b	b	a	a	a	a	b	a	b
ABMR_01I11	b	b	a	a	b	a	a	a	b	a	a	b	b	a	b	b	b	a	b	b	a	b	a	a	b	b	a	b	b	b	a	a	b	a	b	a	a	b	a	a	b	b	b	a	a	b	a	a	b
ABMR_01I13	a	b	a	a	b	b	a	b	a	b	a	a	b	b	a	a	a	b	a	a	b	a	a	a	b	a	b	a	b	a	b	a	a	a	a	b	b	b	b	a	a	b	a	b	b	a	b	b	a
ABMR_01J04	a	b	a	b	b	a	b	a	b	a	a	a	a	b	a	b	b	b	b	a	a	b	a	b	b	a	a	b	b	b	b	b	b	b	b	b	b	b	a	a	b	b	a	a	b	a	a	b	b
ABMR_01K05	-	b	b	b	b	a	a	a	-	a	a	a	b	a	b	b	b	a	b	b	b	a	a	-	b	a	b	a	b	a	b	b	a	-	a	b	a	a	b	a	b	a	b	a	a	b	b	b	a
ABMR_01L08	a	b	a	a	a	a	b	b	b	b	b	a	a	a	a	b	a	b	b	a	a	b	b	b	b	a	b	a	a	a	b	b	b	a	b	a	b	a	a	a	b	a	b	a	a	a	b	a	b
ABMR_01L24	a	a	b	a	a	a	a	b	a	b	a	b	b	b	b	b	b	a	a	a	a	a	a	a	a	b	a	a	a	a	a	b	b	a	a	b	a	b	a	a	b	a	a	b	a	b	b	a	a
ABMR_01M20	a	b	b	a	a	b	b	b	a	b	b	a	b	b	b	b	b	b	a	a	a	a	a	b	b	a	a	a	a	a	b	b	a	a	b	a	b	a	a	a	-	a	b	a	a	a	a	a	b
ABMR_01N13	a	b	b	b	a	a	b	-	b	a	a	a	a	b	a	a	b	b	a	b	a	b	a	a	b	a	a	b	a	a	b	b	a	a	b	b	a	a	b	b	a	b	-	b	b	a	a	-	a
ABMR_01N22	a	b	a	b	b	a	b	a	b	b	a	b	a	b	a	b	a	a	b	a	a	b	a	a	b	a	b	a	b	b	b	b	b	b	b	a	b	b	a	a	b	b	a	a	b	a	a	b	b
ABMR_01O06	a	a	a	a	b	b	b	b	b	a	b	a	a	b	b	b	a	b	b	a	a	a	b	b	a	a	a	b	b	b	a	b	a	b	b	a	b	a	a	a	b	b	b	b	b	b	b	b	a
ABMR_01O10	a	a	a	a	b	b	b	b	b	a	b	a	a	b	b	b	a	b	-	a	a	a	b	b	a	a	a	b	b	b	a	b	a	b	b	a	b	a	a	a	b	b	b	b	b	b	b	b	a
ABMR_01O23	-	b	a	a	a	b	b	b	b	a	b	a	a	a	a	a	-	a	a	b	a	a	a	b	b	b	b	b	a	b	a	b	a	-	a	b	a	a	a	b	b	b	a	b	a	a	a	a	a
ABMR_02B03*	a	a	b	b	b	b	a	b	a	a	a	b	a	b	b	b	b	b	b	b	b	a	a	b	a	b	b	a	a	b	b	a	a	b	b	a	a	a	b	b	a	a	b	b	b	b	b	b	b
ABMR_02B09	a	a	b	a	a	a	a	b	a	b	a	b	b	b	b	b	b	a	a	a	a	a	a	a	a	b	a	a	a	a	a	b	b	a	a	b	a	b	a	a	b	a	a	b	a	b	b	a	a
ABMR_02B16	a	a	a	b	b	a	b	b	b	a	b	b	b	a	a	b	a	b	a	b	b	b	a	b	b	b	a	b	b	b	a	-	a	a	a	a	b	a	b	a	b	b	b	a	b	a	b	b	a
ABMR_02C07	b	a	a	a	a	-	a	b	b	a	b	a	b	b	b	a	b	a	a	a	b	a	a	a	a	b	a	b	b	b	a	a	-	b	a	b	b	a	a	b	b	b	a	b	a	b	b	b	a
ABMR_02C22*	a	a	b	a	a	b	b	b	a	a	b	a	b	b	b	b	b	-	a	a	a	b	a	-	b	a	a	a	a	a	a	b	a	a	b	a	b	a	a	a	b	a	b	a	a	a	a	a	b
ABMR_02D06	b	a	a	a	b	a	b	a	b	a	a	b	a	a	a	b	a	b	b	b	b	b	a	a	b	b	b	a	a	a	b	a	b	b	a	a	a	b	a	b	a	a	b	a	a	b	b	b	a
ABMR_02D07	a	a	a	b	a	a	b	b	a	b	a	a	b	b	a	a	b	a	b	b	b	a	b	b	b	b	b	a	a	b	a	a	b	b	b	b	a	a	b	b	a	a	a	a	b	b	a	a	b
ABMR_02D09	b	a	a	b	a	a	b	a	a	a	b	a	b	b	a	b	a	a	b	b	b	a	a	b	b	a	b	a	b	a	b	b	a	b	a	b	b	b	a	b	a	a	-	a	a	a	-	a	a
ABMR_02D20	a	a	b	b	a	a	b	a	a	a	b	a	a	b	b	b	-	b	a	a	b	b	b	b	a	b	a	b	a	a	a	a	a	b	b	a	b	a	b	b	a	a	a	b	a	b	b	b	b
ABMR_02F20	b	a	b	b	b	-	a	b	a	a	b	a	b	b	a	b	b	a	a	a	a	a	a	a	b	b	a	a	a	a	a	a	b	a	b	a	a	a	b	a	b	a	a	a	b	b	b	a	b
ABMR_02F23	b	a	b	b	a	a	a	b	b	a	b	a	b	a	b	a	b	b	a	a	b	b	a	b	b	a	a	b	b	b	b	a	a	a	a	b	b	a	b	a	b	b	b	a	a	a	a	a	a
ABMR_02J04	a	a	b	b	a	a	b	a	b	a	b	a	a	a	b	a	a	b	b	b	b	b	a	b	b	b	a	b	b	b	b	a	a	b	a	b	b	b	b	b	a	b	a	a	a	b	a	a	b
ABMR_02J20	a	a	a	b	a	a	a	b	a	a	b	b	a	b	b	a	b	b	a	b	b	a	b	b	a	a	a	b	a	b	b	b	b	b	a	b	a	b	a	b	a	a	a	a	b	b	a	a	b
ABMR_02K06	a	a	b	a	a	a	a	b	a	b	a	b	b	b	b	b	b	a	a	a	a	a	a	a	a	b	a	a	a	a	a	b	b	a	a	b	a	b	a	a	b	a	a	b	a	b	b	a	a
ABMR_02K18	b	a	b	b	b	-	a	b	a	a	b	a	b	b	a	b	b	a	a	a	a	a	a	a	b	b	a	a	a	a	a	a	b	a	b	a	a	a	b	a	b	a	a	a	b	b	b	a	b
ABMR_02N09	a	b	a	b	b	a	b	a	b	a	a	a	a	b	a	b	b	b	b	a	a	b	a	b	b	a	a	b	b	b	b	b	a	b	b	-	b	b	a	a	b	b	a	a	b	a	a	b	b
ABMR_02N22	b	a	a	a	a	b	b	a	a	b	a	b	b	a	a	a	b	b	a	b	a	b	a	a	a	a	a	a	b	b	b	a	b	a	b	a	b	b	b	a	b	a	b	a	a	a	a	a	a
ABMR_02O17	a	a	a	b	a	b	b	a	a	b	b	a	a	b	b	b	b	b	a	a	b	b	b	b	a	b	b	a	a	b	a	a	a	b	b	a	b	a	b	b	a	b	a	a	a	b	b	b	b
ABMR_02O22	b	b	b	a	a	b	a	a	a	b	a	a	b	a	a	b	a	a	b	a	a	a	b	b	b	b	b	a	b	a	a	b	b	b	a	a	b	a	b	b	a	a	a	-	a	b	b	b	a
ABMR_02P15	b	a	a	b	a	a	b	a	a	a	b	a	b	b	a	b	a	a	b	a	b	b	a	b	b	a	b	a	a	a	b	b	a	b	a	a	a	a	a	b	a	a	b	a	a	a	b	a	a
ABMR_03A05	a	b	a	b	b	a	b	a	b	b	a	b	a	b	a	b	b	a	b	a	a	b	a	a	b	a	b	a	b	b	b	b	b	b	b	b	b	b	a	a	b	b	a	a	b	a	a	b	b
ABMR_03A20	b	b	a	a	b	b	b	a	b	a	b	b	a	a	a	b	a	b	a	b	b	b	a	a	a	a	b	a	a	a	-	a	b	a	b	a	a	a	b	b	a	a	b	a	a	b	b	b	a
ABMR_03D01	a	b	a	b	b	a	a	a	b	a	a	a	b	b	b	b	a	a	b	b	b	a	a	b	b	a	b	a	b	b	b	b	a	b	a	b	a	a	b	b	a	a	a	a	b	b	b	b	a
ABMR_03D07	a	b	a	b	b	a	b	a	b	a	a	a	a	b	a	b	b	b	b	a	a	b	a	b	b	a	a	b	b	b	b	b	a	b	b	b	b	b	a	a	b	-	a	a	b	a	a	b	b
ABMR_03D09	a	a	b	a	a	a	a	b	a	b	b	a	a	a	a	b	a	a	a	b	b	a	b	a	b	b	a	b	a	a	b	b	a	b	a	b	a	b	b	b	b	b	a	a	-	b	b	b	a
ABMR_03D12	b	b	b	a	b	a	a	b	a	b	a	b	b	b	b	a	b	b	b	a	b	a	b	b	b	b	b	a	b	a	b	b	a	a	a	b	b	a	-	a	a	b	a	b	a	a	a	a	b
ABMR_03D15	b	b	b	a	a	b	a	a	a	b	a	a	b	a	a	b	a	a	b	a	a	a	b	b	b	b	b	a	b	a	a	b	b	b	a	a	b	b	b	b	a	a	a	b	a	b	b	b	a
ABMR_03D20	b	a	b	a	a	b	a	b	b	a	b	a	b	b	b	b	b	a	a	a	b	a	a	a	a	b	a	b	b	b	a	a	b	b	b	a	b	a	b	b	b	b	a	b	a	b	b	b	a
ABMR_03E15	a	b	a	b	b	a	a	a	b	a	a	a	b	b	b	b	a	a	b	b	b	a	a	b	b	a	b	a	b	b	b	b	a	b	a	b	a	a	b	b	a	a	a	a	b	b	b	b	a
ABMR_03E19	a	a	b	b	a	b	b	a	a	b	b	a	a	b	b	b	b	b	a	a	b	b	-	b	a	b	a	a	a	a	a	a	a	b	b	a	b	a	b	a	b	b	a	a	a	b	a	b	b
ABMR_03F04	a	b	a	a	b	a	a	a	b	a	a	a	b	b	b	b	a	a	b	b	b	b	a	b	b	a	b	a	b	b	b	b	a	b	a	b	a	a	b	b	a	a	-	a	b	b	b	b	a
ABMR_03F13*	a	a	b	b	b	b	a	b	a	a	a	b	a	b	b	b	b	b	b	b	b	a	a	b	a	b	b	a	a	b	b	a	a	b	b	a	a	a	b	b	a	a	b	b	b	b	b	b	b
ABMR_03F19	a	a	b	a	a	a	a	b	a	b	a	b	b	b	b	b	b	a	a	a	a	a	a	a	a	b	a	a	a	a	a	b	b	a	a	b	a	b	a	a	b	a	a	b	a	b	b	a	a
ABMR_03F22	b	a	a	a	a	b	b	a	a	b	a	b	b	a	a	a	b	b	a	b	a	b	a	a	a	a	a	a	b	b	b	a	b	a	b	a	b	b	b	a	b	a	b	a	a	a	a	a	a
ABMR_03G21	a	b	a	a	b	b	a	b	a	b	a	a	b	b	a	a	a	b	a	b	a	a	a	a	b	a	b	a	b	a	b	a	a	a	a	b	b	b	b	a	a	b	a	b	b	a	b	b	a
ABMR_03H04	b	a	a	b	a	a	a	a	b	b	a	b	a	b	b	b	a	b	-	b	a	b	a	b	a	a	b	a	b	b	a	b	a	a	a	a	b	b	b	b	a	a	a	b	b	b	a	a	b
ABMR_03H10	a	a	a	a	b	b	b	b	a	b	a	a	a	a	a	b	a	b	a	a	a	a	b	b	b	b	a	b	b	a	a	a	b	b	a	a	a	a	a	a	a	b	b	b	a	b	b	b	a
ABMR_03H18	b	b	a	a	b	a	a	b	a	b	b	b	b	a	b	a	b	b	a	b	a	a	a	b	a	b	a	b	b	a	a	a	a	b	b	b	b	a	b	b	b	a	a	a	a	a	b	a	b
ABMR_03I10	a	a	b	a	a	a	a	b	a	b	a	b	b	b	b	b	b	a	a	a	a	a	a	a	a	b	a	a	a	a	a	b	b	a	a	b	a	b	-	a	b	a	a	b	a	-	-	a	a
ABMR_03J01	b	a	b	a	b	b	a	b	b	a	a	a	a	b	a	a	b	b	a	b	a	a	a	b	b	a	b	a	b	b	b	b	b	b	b	a	b	b	a	b	b	b	a	b	b	b	b	a	b
ABMR_03J13	b	a	b	a	b	a	a	b	a	b	a	a	b	b	b	a	b	b	b	a	b	a	b	b	b	b	b	a	b	a	b	b	a	a	a	b	b	b	b	a	a	a	b	b	a	a	b	a	b
ABMR_03J24*	a	a	b	b	b	b	a	b	a	a	a	b	a	b	b	b	a	b	b	b	b	a	a	b	a	b	b	a	a	b	b	a	b	b	b	a	a	a	b	b	b	a	b	b	b	b	b	b	b
ABMR_03K06	a	a	b	b	a	a	a	b	a	b	b	a	a	a	a	a	b	b	a	a	a	b	b	b	a	a	b	a	a	a	b	a	b	a	a	b	b	b	a	b	b	a	a	b	a	b	a	b	a
ABMR_03L06	a	a	b	a	a	a	a	b	a	b	a	b	b	b	b	b	b	a	a	a	a	a	a	a	a	b	a	a	a	a	a	b	b	a	a	b	a	b	a	a	b	a	a	b	a	b	b	a	a
ABMR_03M24	a	a	a	a	b	b	a	a	b	a	b	a	a	a	b	b	b	b	a	b	b	b	a	b	a	a	b	a	b	b	a	b	b	a	b	b	a	a	b	a	b	b	b	a	a	b	b	a	b
ABMR_03O18	b	a	b	b	b	b	a	b	a	a	b	a	b	b	a	b	b	a	a	a	a	a	a	a	b	b	a	a	a	a	a	a	b	a	b	a	a	a	b	a	b	a	a	a	b	b	b	a	b
ABMR_03P23*	a	b	a	a	a	a	b	a	a	a	a	a	a	b	a	b	a	b	a	b	b	b	a	a	a	b	a	a	a	a	a	a	a	a	a	b	a	a	a	b	b	a	a	b	a	a	a	b	a
ABMR_04H23	a	a	a	a	a	b	a	b	b	a	b	a	a	a	a	b	a	a	b	a	a	a	b	b	b	a	b	a	a	b	a	b	a	b	a	b	b	a	a	b	a	b	a	b	a	b	b	b	a
ABMR_04J07	a	a	a	a	b	b	b	b	a	b	a	a	a	a	b	b	a	b	a	a	a	a	b	b	b	a	a	b	b	a	a	a	b	b	b	a	b	a	a	a	b	b	b	b	a	b	b	b	a
ABMR_04K14*	a	a	a	b	a	b	a	b	b	b	b	a	a	a	b	b	b	b	a	a	b	b	b	b	a	b	b	a	a	b	a	b	a	b	b	a	b	a	b	b	a	b	-	b	a	b	b	b	b
ABMR_04K20	a	b	a	a	a	a	a	a	b	a	a	a	b	b	b	b	a	a	b	b	b	b	a	b	b	a	b	-	b	b	b	b	a	b	a	b	a	a	b	b	a	a	a	a	b	a	b	a	b
ABMR_04L21	a	a	a	a	b	b	a	a	b	a	a	a	a	a	b	b	b	b	a	b	b	b	a	b	b	a	b	a	b	b	a	b	b	a	b	b	a	a	b	a	b	b	b	a	a	b	b	a	b
ABMR_04M04	b	a	a	a	a	b	b	b	a	a	b	b	a	a	a	b	a	b	a	a	a	b	a	b	b	b	b	a	a	b	b	b	b	b	a	a	b	b	a	b	b	a	a	b	a	a	a	a	b
ABMR_04M05*	a	a	b	b	a	b	b	b	a	a	b	b	b	-	b	b	a	b	b	a	b	a	a	b	a	b	b	a	a	b	b	a	b	a	b	b	a	a	a	a	b	b	b	a	b	b	b	a	b
ABMR_04N24	b	a	b	b	b	b	a	b	a	a	b	a	b	b	a	b	b	a	a	a	a	a	a	a	b	b	a	a	a	a	a	a	b	-	b	a	a	a	b	a	b	a	a	a	b	b	b	a	b
ABMR_04O20	b	b	a	a	b	a	a	b	a	b	b	b	b	a	b	a	a	b	a	b	a	a	a	b	a	b	a	b	b	a	a	a	a	b	b	b	b	a	b	b	b	a	a	a	a	a	b	a	b
ABMR_05A24	a	a	a	a	a	a	a	b	a	b	a	a	b	a	b	a	b	b	b	b	b	b	b	a	b	b	b	b	b	b	a	a	a	b	a	b	b	a	b	a	b	b	a	b	a	b	b	a	a
ABMR_05B13	a	a	b	b	a	a	a	b	a	a	b	a	a	b	a	b	b	a	b	a	a	a	b	b	b	a	b	a	a	b	b	a	b	a	a	b	a	b	a	a	a	a	b	a	a	b	b	b	a
ABMR_05C04	b	a	a	b	a	a	b	a	a	a	b	a	b	b	a	b	a	a	b	a	b	a	a	b	b	a	b	a	b	a	b	b	a	b	a	a	a	b	a	b	a	a	b	a	a	a	b	a	a
ABMR_05E23	b	a	a	a	b	a	a	a	b	a	a	b	b	a	b	b	b	a	b	b	a	b	a	a	b	b	a	a	a	b	a	a	b	a	a	a	a	b	a	b	b	a	b	a	a	b	a	b	a
ABMR_05G15	b	a	a	a	a	b	a	b	b	a	b	a	b	b	b	a	b	a	a	a	a	a	a	a	a	-	-	-	b	b	a	a	b	b	a	b	b	a	a	b	a	b	a	b	a	b	b	b	a
ABMR_05H15	a	b	a	a	b	b	a	a	b	a	b	a	a	b	b	b	b	b	a	b	b	b	a	b	a	a	b	a	b	b	a	b	b	a	b	b	a	a	b	a	b	b	b	a	a	b	b	a	b
ABMR_05H19	a	a	a	a	b	b	b	b	a	b	a	a	a	b	b	b	a	b	b	a	a	a	b	b	a	a	a	b	b	a	a	b	a	b	b	a	b	a	a	a	a	b	b	b	a	b	b	b	a
ABMR_05H22	a	a	b	b	a	a	b	a	a	a	b	a	a	b	b	b	b	b	a	a	b	b	b	b	a	b	a	b	a	a	a	a	a	b	b	a	b	a	b	b	a	a	a	b	a	b	b	b	b
ABMR_05I17	b	a	a	a	a	b	a	b	b	a	b	a	a	a	b	a	b	a	a	a	a	a	a	a	b	b	b	b	a	b	a	b	a	b	a	b	a	b	a	b	b	b	a	b	b	b	b	a	a
ABMR_05I21*	a	a	b	a	a	b	b	b	a	a	b	a	b	b	b	b	b	b	a	a	a	b	a	b	b	a	a	a	a	a	a	b	a	a	b	a	b	a	a	a	b	a	-	a	a	a	a	a	b
ABMR_05J13	a	b	b	b	a	a	b	b	b	a	a	a	a	b	b	a	b	b	a	b	a	b	a	a	b	a	a	b	a	a	b	b	a	a	b	b	a	a	b	a	a	b	b	b	b	a	a	b	a
ABMR_05J18	a	b	a	b	b	a	a	a	b	b	a	a	b	b	b	b	a	a	b	b	b	a	a	b	b	a	b	a	b	b	b	b	a	b	a	b	a	a	b	b	b	a	a	a	b	b	b	b	a
ABMR_05J19	b	a	a	b	a	a	b	a	a	a	b	a	b	b	a	b	-	a	b	a	-	a	a	b	b	a	b	a	b	a	b	b	a	b	a	a	a	b	a	b	a	a	b	a	a	a	b	a	a
ABMR_05J22	a	a	b	a	a	b	b	b	a	a	b	a	a	b	b	b	b	b	a	a	a	b	a	b	b	a	a	a	a	a	a	b	b	a	b	a	b	a	a	a	b	a	b	b	a	a	a	a	b
ABMR_05J23	a	b	b	b	a	a	b	b	b	a	b	a	b	b	b	a	b	b	a	a	a	b	a	a	b	a	a	b	a	a	b	b	a	a	a	b	a	a	b	a	a	b	b	b	b	a	a	b	a
ABMR_05K18	a	b	a	a	a	a	b	a	b	b	b	a	a	a	a	b	b	b	b	a	a	b	b	b	b	a	b	a	a	a	b	b	b	a	b	a	a	a	a	b	b	a	b	a	b	a	b	a	a
ABMR_05L12	b	a	a	a	b	b	b	b	a	a	a	a	b	b	b	b	b	b	a	b	b	b	a	b	a	a	b	a	a	b	b	b	a	a	a	b	b	a	a	b	a	b	a	b	a	b	b	b	a
ABMR_05M03	b	a	a	b	a	a	b	a	a	a	b	a	b	-	a	b	a	a	b	b	b	a	a	b	b	a	b	a	b	a	b	b	a	b	a	b	b	b	a	b	a	a	b	a	a	a	b	a	a
ABMR_05N01	a	a	a	a	a	b	b	a	a	a	a	a	b	b	b	b	b	a	b	b	b	a	a	b	b	a	b	a	b	b	b	b	b	b	a	a	a	b	a	b	b	a	a	a	a	a	b	b	a
ABMR_05N03**	a	a	b	b	b	b	a	b	a	a	a	b	a	b	b	b	b	b	b	b	b	a	a	b	a	b	b	a	a	b	b	a	a	b	b	a	a	a	b	b	a	a	b	b	b	b	b	b	b
ABMR_05N06	a	a	a	b	a	a	b	b	a	b	a	a	b	b	a	a	b	a	b	b	b	a	b	b	b	b	b	a	a	b	a	a	b	b	b	b	a	a	b	b	a	a	a	a	b	b	a	a	b
ABMR_05N21	a	a	a	a	a	a	a	b	a	b	a	a	b	a	b	a	b	b	b	b	b	b	b	a	b	b	b	b	b	b	a	a	a	b	a	b	b	a	b	a	b	b	a	b	a	b	b	a	a
ABMR_05O20	b	a	b	b	b	-	a	b	a	a	b	a	b	b	a	b	b	a	a	a	a	a	a	a	b	b	a	a	a	a	a	a	b	a	b	a	a	a	b	a	b	a	a	a	b	b	-	a	b
ABMR_05O21	b	a	b	b	b	-	a	b	a	a	b	a	b	b	a	b	b	a	a	a	a	a	a	a	b	b	a	a	a	a	a	a	b	a	b	a	a	a	b	a	b	a	a	a	b	b	b	a	b
ABMR_05P05	a	a	a	a	a	a	b	b	a	a	b	b	b	b	b	a	b	b	a	a	a	b	a	a	b	a	a	b	b	b	b	b	b	a	b	b	a	a	b	b	b	a	a	a	b	b	a	a	b
ABMR_05P16	a	b	a	a	b	b	a	b	b	b	a	a	a	b	a	a	b	a	-	a	b	a	a	a	b	a	b	a	b	a	b	a	b	a	a	b	b	b	b	a	a	b	a	-	b	a	b	b	a
ABMR_05P21	b	a	b	a	b	b	a	a	b	a	a	a	a	b	a	a	b	b	a	b	a	a	a	b	b	a	b	a	b	b	b	b	b	b	b	a	b	b	a	b	b	b	a	b	b	b	b	a	b
ABMR_05P24	b	a	b	a	b	a	a	b	a	b	a	a	b	b	b	a	b	b	b	a	b	a	b	b	b	b	b	a	b	a	b	b	a	a	a	b	b	-	b	a	a	a	b	b	a	a	b	a	b
ABMR_06A11	a	b	a	a	a	a	a	b	b	b	a	a	b	b	b	a	b	b	a	-	a	-	b	a	b	b	a	a	b	a	b	a	b	a	a	a	a	a	b	b	a	a	a	a	a	a	b	a	b
ABMR_06C17	b	b	b	b	b	a	b	a	a	b	b	a	a	a	b	b	a	b	b	a	a	a	b	b	a	a	a	b	b	a	b	a	a	a	-	a	a	b	a	b	b	b	a	b	-	a	a	b	b
ABMR_06C21*	a	a	b	b	b	b	a	b	a	a	a	b	a	b	b	b	b	b	b	b	b	a	a	b	a	b	b	a	a	b	b	a	a	b	b	a	a	a	b	b	a	a	b	b	b	b	b	b	b
ABMR_06E12	b	a	b	a	b	b	b	b	a	a	b	a	b	b	b	b	b	b	a	a	b	b	a	b	a	a	b	a	a	a	a	b	a	a	a	b	b	a	a	b	a	b	a	b	a	b	b	b	a
ABMR_06E20	b	b	b	b	b	a	a	a	b	b	a	b	a	b	a	a	a	a	b	a	b	a	b	a	b	a	a	a	a	a	a	a	a	a	a	b	b	b	b	b	a	a	a	a	b	b	b	b	b
ABMR_06F05	a	b	a	a	b	b	a	b	a	b	a	a	b	b	a	a	b	b	a	a	b	a	a	a	b	a	b	a	b	a	b	a	a	a	a	b	b	b	b	a	a	b	a	b	b	a	b	b	a
ABMR_06F17	a	a	b	a	a	b	b	b	a	a	b	a	a	b	b	b	b	b	a	a	a	b	a	b	b	a	a	a	a	a	a	b	b	a	b	a	b	a	a	a	b	a	b	b	a	a	a	a	b
ABMR_06F24	b	a	b	a	b	a	a	b	a	b	a	a	b	b	b	a	b	b	b	a	b	a	b	b	b	-	b	a	b	a	b	b	a	a	a	b	b	b	b	a	a	a	b	b	a	a	b	a	b
ABMR_06H04*	b	a	a	a	b	a	a	b	b	b	b	b	b	a	b	b	b	a	b	b	a	b	a	b	b	a	b	b	a	a	b	b	a	b	a	b	a	b	b	b	b	b	a	b	b	b	b	b	b
ABMR_06J06	b	a	b	a	b	b	a	b	b	a	a	a	a	b	a	a	b	b	a	b	a	a	a	b	b	a	b	a	b	-	b	b	b	b	b	a	b	b	a	b	b	b	a	b	b	b	b	a	b
ABMR_06L11	a	a	a	a	a	b	b	a	a	a	a	a	b	b	b	b	b	a	b	b	b	a	a	b	b	a	b	a	b	b	b	b	b	b	a	a	a	b	a	b	b	a	a	a	a	a	b	b	a
ABMR_06M13	a	b	a	b	b	a	a	a	b	b	a	a	b	b	b	b	a	a	b	b	b	a	a	b	b	a	b	a	b	b	b	b	a	b	a	b	a	a	b	b	b	a	a	a	b	b	b	b	a
ABMR_06N21	a	b	a	b	b	a	b	a	b	a	a	a	a	b	a	b	b	b	b	a	a	b	a	b	b	a	a	b	b	b	b	b	b	b	b	b	b	b	a	a	b	b	a	a	b	a	a	b	b
ABMR_06P04	a	a	b	a	a	a	a	b	a	b	b	a	a	a	a	b	a	a	a	b	b	a	b	a	b	b	a	b	a	a	b	b	a	b	a	b	a	b	b	b	b	b	a	a	b	b	b	b	a
ABMR_06P05	b	b	a	a	b	b	b	a	b	a	b	b	a	a	a	b	a	b	a	b	b	b	a	a	a	a	b	a	a	a	b	a	b	a	b	a	a	a	b	b	a	a	b	a	-	b	b	b	a
ABMR_06P22	b	a	a	a	a	b	b	a	a	b	a	b	b	a	a	a	-	b	a	b	a	b	a	a	a	a	a	b	b	b	b	a	b	b	b	a	b	b	-	b	b	a	b	a	a	a	a	a	a
ABMR_07A16	a	a	a	a	b	b	a	a	b	a	a	a	a	a	b	b	b	b	a	b	b	b	a	b	b	a	b	a	b	b	a	b	b	a	b	b	a	a	b	a	b	b	b	a	a	b	b	a	b
ABMR_07A18	a	b	b	b	b	b	a	b	a	b	a	b	a	b	b	b	a	b	a	b	b	a	a	b	a	b	a	a	a	b	a	b	b	b	b	a	a	a	b	b	a	a	b	b	b	b	b	b	b
ABMR_07B15	a	b	b	a	a	b	b	b	a	b	b	a	b	b	b	b	b	b	a	a	a	a	a	b	b	a	a	a	a	a	b	b	a	b	b	a	b	a	a	a	b	a	b	a	a	a	b	a	b
ABMR_07C14	a	a	a	b	a	b	a	b	b	b	b	a	a	a	b	b	b	b	a	a	b	b	b	b	a	a	b	a	a	b	a	b	a	b	b	a	b	a	b	b	a	b	a	b	a	b	b	b	b
ABMR_07D17	a	b	a	a	b	b	a	b	a	b	a	a	b	b	a	a	a	b	a	a	b	a	a	a	b	a	b	a	b	a	b	a	a	a	a	b	b	b	b	a	a	b	a	b	b	a	b	b	a
ABMR_07F10	b	a	a	b	a	a	b	a	a	a	a	a	b	b	a	b	a	a	b	a	b	b	a	b	b	a	b	a	a	a	b	b	a	b	a	a	a	a	b	b	a	a	b	a	a	a	b	a	a
ABMR_07F15	b	a	b	a	b	a	a	b	a	b	a	a	b	b	b	a	b	b	b	a	b	a	b	b	b	b	b	a	b	a	b	b	a	a	a	b	b	b	b	a	a	a	b	b	a	a	b	a	b
ABMR_07G20	a	b	b	a	b	b	a	b	a	b	a	a	b	b	a	a	a	b	a	b	a	a	a	a	b	a	b	a	b	a	b	a	a	a	a	b	b	b	b	a	a	b	a	b	b	a	b	b	a
ABMR_07H18	b	a	b	a	b	b	a	a	b	a	a	a	a	b	a	a	b	b	a	b	a	a	a	b	b	a	b	a	b	b	b	b	b	b	b	a	b	b	a	b	b	b	a	b	b	b	b	a	b
ABMR_07J01	b	b	a	a	a	b	b	b	b	a	b	a	a	a	b	a	b	a	a	b	a	a	a	b	b	b	b	b	a	b	a	b	a	b	a	b	a	b	a	b	b	b	a	b	b	b	a	a	a
ABMR_07J24	b	b	a	b	b	a	b	a	b	b	a	a	a	b	a	b	b	b	b	a	a	b	a	b	a	a	a	b	b	b	b	a	a	b	b	-	b	-	a	a	b	b	a	a	b	a	a	a	b
ABMR_07K06*	a	b	a	b	a	a	b	a	a	a	a	a	a	b	a	b	a	b	a	b	b	b	a	a	a	b	a	a	a	a	a	a	a	a	a	b	a	a	a	b	b	a	a	b	a	a	a	b	a
ABMR_07L03	a	b	a	a	a	a	b	b	b	b	b	a	a	a	a	b	a	b	b	a	a	b	b	b	b	a	b	a	a	a	b	b	b	a	b	a	b	a	a	a	b	a	b	a	a	a	b	a	b
ABMR_07L04	a	b	a	a	a	a	a	b	b	b	a	a	b	b	b	a	b	b	a	a	a	a	b	a	b	b	a	a	b	a	b	a	b	a	a	a	a	a	b	b	a	a	a	a	a	a	b	a	b
ABMR_07L14	a	b	b	b	a	a	b	b	b	a	a	a	a	b	b	a	b	b	a	a	a	b	a	a	b	a	a	b	a	a	b	b	a	a	b	b	a	a	b	a	a	b	b	b	b	a	a	b	a
ABMR_07L18*******	b	a	a	a	a	a	a	a	a	a	b	a	b	a	a	b	b	a	a	a	a	a	a	a	a	a	a	a	a	a	a	a	b	a	a	a	a	a	b	a	b	a	a	a	a	a	a	a	a
ABMR_07M17	a	a	a	b	a	b	a	b	b	b	b	a	a	a	b	b	b	a	b	a	b	b	b	b	a	a	b	a	a	b	a	b	a	b	a	b	b	a	b	b	a	b	a	b	a	b	b	b	b
ABMR_07N15	a	a	a	b	a	b	b	a	a	b	b	a	a	b	b	b	b	b	a	a	b	b	b	b	a	b	b	a	a	b	a	a	a	b	b	a	b	a	b	b	a	b	a	a	a	b	b	b	b
ABMR_07O04	b	b	a	a	a	b	b	b	b	a	b	a	a	a	b	a	b	a	a	b	a	a	a	b	b	b	b	b	a	b	a	b	a	b	a	b	a	b	a	b	b	b	a	b	b	b	a	a	a
ABMR_07O10	a	b	a	a	a	a	b	b	b	b	b	a	a	a	a	b	a	b	b	a	a	-	b	b	b	a	b	-	a	a	b	b	b	a	b	a	b	a	a	a	b	a	b	a	a	a	b	a	b
ABMR_07O18	b	a	b	a	b	a	a	b	a	b	a	a	b	b	b	a	b	b	b	a	b	a	b	b	b	b	b	a	b	a	b	b	a	a	a	b	b	b	b	a	a	a	b	b	a	a	b	a	b
ABMR_08A01	b	a	b	a	a	a	a	b	a	b	a	b	b	b	b	a	b	b	a	a	b	b	a	b	a	a	a	b	b	b	b	a	a	a	a	b	b	a	b	a	b	b	b	a	a	a	b	a	a
ABMR_08A24	b	a	b	b	b	a	a	b	a	a	b	a	b	b	a	b	b	a	a	a	a	a	a	a	b	b	a	a	a	a	a	a	b	a	b	a	a	a	b	a	b	a	a	a	b	b	b	a	b
ABMR_08B07	a	b	a	a	b	b	a	b	a	b	a	a	b	b	a	a	a	b	a	b	a	a	a	a	b	a	b	a	b	a	b	a	a	a	a	b	b	b	b	a	a	b	a	b	b	a	b	b	a
ABMR_08D24	a	b	b	b	a	b	a	a	a	b	b	b	a	a	b	a	b	a	b	a	a	b	a	b	a	a	a	b	a	a	b	a	a	a	b	b	b	b	b	b	a	a	a	b	a	b	a	b	a
ABMR_08E20	b	b	a	b	b	a	b	a	b	b	a	a	a	b	a	b	b	b	b	a	a	b	a	b	a	a	a	b	b	b	b	b	a	b	b	b	b	b	a	a	b	b	a	a	b	a	a	b	b
ABMR_08F01	a	a	a	a	b	b	a	a	b	a	a	a	a	a	b	a	b	b	a	b	a	a	a	b	b	a	b	a	b	b	a	b	b	a	b	b	b	a	b	a	b	b	b	b	a	b	b	a	b
ABMR_08F04	a	a	a	a	a	b	a	b	b	a	b	a	a	a	a	b	a	a	b	a	a	a	b	b	b	a	b	a	a	b	a	b	a	b	a	b	b	a	a	b	a	b	a	b	a	b	b	b	a
ABMR_08G07	a	a	b	a	a	a	a	b	a	b	a	b	b	b	b	b	b	a	a	a	a	a	a	a	a	b	a	a	a	a	a	b	b	a	a	b	a	b	a	a	b	a	a	b	a	b	b	a	a
ABMR_08G09	b	a	a	a	a	a	b	a	a	a	b	b	b	b	a	a	b	b	a	a	a	b	a	a	b	a	a	b	b	b	b	b	b	a	b	b	a	a	b	b	b	a	a	a	b	b	a	a	b
ABMR_08H01	a	b	a	a	b	b	a	a	a	a	b	a	a	a	a	b	a	b	a	b	b	b	a	a	a	a	b	a	b	a	b	b	b	a	b	a	a	a	b	a	b	b	b	a	a	b	b	b	a
ABMR_08H09	a	b	b	a	a	b	b	b	a	a	b	a	b	b	b	b	b	b	a	a	a	b	a	b	b	a	a	a	a	a	a	b	a	a	b	a	b	a	a	a	b	a	b	a	a	a	a	a	b
ABMR_08J09	b	a	b	a	a	a	a	b	a	b	a	b	b	b	b	a	b	b	a	a	b	b	a	b	a	a	a	b	b	b	b	a	a	a	b	a	a	a	b	a	b	-	a	a	a	a	b	a	b
ABMR_08K17	a	a	b	a	a	b	a	b	b	a	b	a	a	b	b	a	a	b	a	a	b	a	a	b	a	a	a	a	a	b	b	b	a	a	b	a	a	b	b	a	b	a	b	b	a	b	a	a	a
ABMR_08K20	a	b	a	b	b	a	a	a	b	b	a	a	b	b	b	b	a	a	b	b	b	a	a	b	b	a	b	a	b	b	b	b	a	b	a	b	a	a	b	b	b	a	a	a	b	b	b	b	a
ABMR_08L11	a	a	a	b	a	a	b	b	a	b	a	a	b	b	a	a	b	a	b	b	b	a	b	b	b	b	b	a	a	b	a	a	b	b	b	b	a	a	b	b	a	a	a	a	b	b	a	a	b
ABMR_08L18	a	a	a	a	a	a	b	b	a	a	b	b	b	b	b	a	b	b	a	a	a	b	a	a	b	a	a	b	b	b	b	b	b	a	a	b	a	a	b	b	b	a	a	a	a	b	a	a	b
ABMR_08N21	a	a	a	a	a	a	a	b	a	b	a	a	-	a	b	a	b	b	b	b	b	b	b	a	b	b	b	b	b	b	a	a	a	b	a	b	b	a	b	a	b	b	a	b	a	b	b	a	a
ABMR_08O08	a	a	b	b	a	a	b	a	b	a	b	a	a	a	b	a	a	-	b	b	b	b	a	b	b	b	a	b	b	b	b	a	a	b	a	b	b	b	b	b	a	b	a	a	a	b	a	a	b
ABMR_08O14	b	a	b	b	b	-	a	b	a	a	b	a	b	b	a	b	b	a	a	a	a	a	a	a	b	b	a	a	a	a	a	a	b	a	b	a	a	a	b	a	b	a	a	a	b	b	-	a	b
ABMR_08O20	b	a	b	b	a	a	a	b	b	a	b	a	b	a	b	a	b	b	a	a	b	b	a	b	b	a	a	b	b	b	b	-	a	a	a	b	b	a	b	a	b	b	b	a	a	a	a	a	a
ABMR_08P12	a	a	a	a	b	-	b	b	a	a	a	a	b	b	b	b	b	b	a	b	b	b	a	b	a	a	b	a	b	b	b	b	b	a	a	a	-	a	a	b	a	-	a	b	a	b	b	b	a
ABMR_09C11	a	b	b	b	a	b	a	a	a	b	b	b	a	a	b	a	b	a	b	a	a	b	a	b	a	a	a	b	a	a	b	a	a	a	b	b	b	b	b	b	a	a	a	b	a	b	a	b	a
ABMR_09E02	a	b	b	a	b	a	a	a	b	a	b	a	b	a	b	a	b	a	a	a	a	b	a	b	b	a	b	a	b	a	b	a	b	b	a	b	b	a	b	b	b	a	a	a	b	a	a	b	a
ABMR_09I04	b	b	a	a	a	b	b	b	b	a	b	a	a	a	a	a	b	a	a	b	a	a	a	b	b	b	a	b	a	b	a	b	a	b	a	b	a	a	a	b	b	b	a	b	a	a	a	a	a
ABMR_09J21	a	a	b	a	a	a	a	b	a	b	a	b	b	b	b	b	b	a	a	a	a	a	a	a	a	b	a	a	a	a	a	b	b	a	a	b	a	b	a	a	b	a	a	b	a	b	b	a	a
ABMR_09J23	b	a	b	b	b	b	a	b	a	a	b	a	b	b	a	b	-	a	a	a	a	a	a	a	b	b	a	a	a	a	a	a	b	a	-	a	a	a	b	a	b	a	a	a	b	-	-	a	b
ABMR_09K12	a	a	a	b	a	a	b	b	a	b	a	a	b	b	a	a	b	a	b	b	b	a	b	b	b	b	b	a	a	b	a	a	b	b	b	b	a	a	b	b	a	a	a	a	b	b	a	a	b
ABMR_09K19	a	b	a	a	b	b	a	b	a	b	a	a	b	b	a	a	a	b	a	a	b	a	a	a	b	a	b	a	b	a	b	a	a	a	a	b	b	b	b	a	a	b	a	b	b	a	b	b	a
ABMR_09M09	a	b	b	a	b	a	a	a	b	a	b	a	b	a	b	a	b	a	a	a	a	b	a	b	b	a	b	a	b	a	b	a	b	b	a	b	b	a	b	b	b	a	a	a	-	a	a	b	a
ABMR_09M18	b	a	b	b	b	-	a	b	a	a	b	a	b	-	a	b	b	a	a	a	a	a	a	a	b	b	a	a	a	a	a	a	b	a	b	a	a	a	b	a	b	a	a	a	b	b	b	a	b
ABMR_09O12	a	a	b	a	a	b	b	b	a	a	b	a	b	b	b	b	b	b	a	a	a	b	a	b	b	a	a	a	a	a	a	b	a	a	b	a	b	a	a	a	b	a	b	a	a	a	a	a	b
ABMR_10B21*	a	a	b	b	b	b	a	b	a	a	a	b	a	b	b	b	b	b	b	b	b	a	a	b	a	b	b	a	a	b	b	a	a	b	b	a	a	a	b	b	a	a	b	b	b	b	b	b	b
ABMR_10C13	b	b	b	a	a	b	-	a	a	b	a	a	b	a	a	-	a	a	b	a	a	a	-	b	b	-	b	a	b	a	a	b	b	b	-	a	b	a	b	b	a	a	-	b	a	b	b	b	a
ABMR_10D16	a	a	b	a	a	a	a	b	a	b	a	b	-	b	-	b	b	a	a	a	a	a	a	a	a	b	a	a	a	a	a	b	b	a	-	-	a	b	a	a	b	a	-	b	a	b	b	a	a
ABMR_10D19	a	a	b	b	a	a	b	a	a	a	b	a	a	b	b	b	b	b	a	a	b	b	b	b	a	b	a	b	a	a	a	a	a	b	b	a	b	a	b	b	a	a	a	b	a	b	a	b	b
ABMR_10E12	a	b	b	b	b	a	a	a	b	a	a	-	b	a	b	b	b	a	b	b	b	a	a	b	b	a	b	a	b	a	b	b	a	b	a	b	a	a	b	a	b	a	b	a	a	b	b	b	a
ABMR_10E14	a	a	a	b	a	a	b	b	a	b	a	a	b	b	a	a	b	a	b	b	b	a	b	b	b	b	b	a	a	b	a	a	b	b	b	b	a	a	b	b	a	a	a	a	b	b	a	a	b
ABMR_10E24	b	b	a	a	a	b	b	b	b	a	b	a	a	a	a	a	b	a	a	b	a	a	a	b	b	b	a	b	a	b	a	b	a	b	a	b	a	a	a	b	b	-	a	b	a	a	a	a	a
ABMR_10G06	a	b	a	a	b	b	a	b	a	b	a	a	b	b	a	a	a	b	a	b	a	a	a	a	b	a	b	a	b	a	b	a	a	a	a	b	b	b	b	a	a	b	a	b	b	a	b	b	a
ABMR_10H05	a	b	a	a	b	b	-	a	b	a	b	a	a	b	b	b	b	b	a	b	b	b	a	b	a	a	b	a	b	b	a	b	b	a	b	b	a	a	b	a	b	b	b	a	a	b	b	a	b
ABMR_10H18	b	b	b	a	b	a	a	b	a	b	a	b	b	b	b	a	b	b	b	a	b	a	b	b	b	b	b	a	b	a	b	b	a	a	a	b	b	a	b	a	a	b	a	b	a	a	b	a	b
ABMR_10I03	a	b	a	a	b	b	a	b	a	b	a	a	b	b	a	a	a	b	a	b	a	a	a	a	b	a	b	a	b	a	b	a	a	a	a	b	b	b	b	a	a	b	a	b	b	a	b	b	a
ABMR_10J13**	a	a	b	b	b	b	a	b	a	a	a	b	a	b	b	b	b	b	b	b	b	a	a	b	a	b	b	a	a	b	b	a	a	b	b	a	a	a	b	b	a	a	b	b	b	b	b	b	b
ABMR_10M06	b	b	a	a	a	b	b	b	b	a	b	a	a	a	a	a	b	a	a	b	a	a	a	b	b	b	a	b	a	b	a	b	a	b	a	b	a	a	a	b	b	b	a	b	a	a	a	a	a
ABMR_10M22	b	a	a	b	a	a	a	a	b	b	a	a	a	a	b	a	b	a	b	a	a	a	b	b	b	b	b	a	b	a	b	b	a	a	a	b	b	b	b	a	a	a	b	b	a	a	a	a	b
ABMR_10N24	b	a	b	a	b	a	a	b	a	b	a	a	b	b	b	a	b	b	b	a	b	a	b	b	b	b	b	a	b	a	b	b	a	a	a	b	b	b	b	a	a	a	b	b	a	a	b	a	b
ABMR_10O20	b	b	a	a	b	a	a	b	a	b	b	b	b	a	b	a	a	b	a	b	a	a	a	b	a	b	a	b	b	a	a	a	a	b	b	b	b	a	b	b	-	a	a	a	a	a	b	a	b
ABMR_10P06	b	b	a	a	a	b	b	b	b	a	b	a	a	a	a	a	b	a	a	b	a	a	a	b	b	b	b	b	a	b	a	b	a	b	a	b	a	b	a	b	b	b	a	b	b	b	a	a	a
ABMR_11D04	a	a	b	b	a	b	b	a	a	b	b	a	a	b	b	b	b	b	a	a	b	b	b	b	a	b	a	a	a	a	a	a	a	b	b	a	b	a	b	b	b	b	a	a	a	b	b	b	b
ABMR_11E14	a	b	b	b	a	a	a	b	b	a	b	a	b	b	b	a	b	b	a	a	b	b	a	b	b	a	a	b	b	a	b	b	a	a	a	b	a	a	b	a	a	b	b	b	b	a	a	b	a
ABMR_11F16	a	b	b	a	b	a	a	a	b	a	b	a	b	a	b	a	b	a	a	a	a	b	a	b	b	a	b	a	b	a	b	a	b	b	a	b	b	a	b	b	b	a	a	a	b	a	a	b	a
ABMR_11H15	a	a	a	a	b	b	b	b	a	b	a	a	a	b	b	b	a	b	b	a	a	a	b	b	a	a	a	b	b	a	a	b	a	b	b	a	b	a	a	a	a	b	b	b	a	-	b	b	a
ABMR_11J07	a	a	a	b	a	-	a	b	a	a	b	b	a	-	b	a	b	b	a	b	b	a	b	b	a	a	a	b	a	-	b	b	b	b	a	b	a	b	a	b	a	a	a	a	b	b	a	a	b
ABMR_11L01	a	b	a	b	b	a	a	a	b	b	a	a	b	b	b	b	a	a	b	b	b	a	a	b	b	a	b	a	b	b	b	b	a	b	a	b	a	a	b	b	b	a	a	a	b	b	b	b	a
ABMR_11O15	a	a	a	a	a	b	a	b	b	a	b	a	a	a	a	-	a	a	b	a	a	a	b	b	b	a	b	a	a	b	a	b	a	b	a	b	b	a	a	b	a	b	a	b	a	b	b	b	a
ABMR_11O20	a	a	a	b	a	a	b	b	a	b	a	a	b	b	a	a	b	a	-	a	b	a	b	b	b	b	b	a	a	b	a	a	b	b	b	b	a	a	b	a	-	b	a	a	b	b	a	a	b
ABMR_11P08	b	a	b	a	b	b	a	a	b	a	a	a	a	b	a	a	b	b	a	b	a	a	a	b	b	a	b	a	b	b	b	b	b	b	b	a	b	b	a	b	b	b	a	b	b	b	b	a	b
ABMR_12B08	a	a	a	a	b	b	b	b	a	b	a	a	a	b	b	b	a	b	b	a	a	a	b	b	a	a	a	b	b	a	a	b	a	b	b	a	b	a	a	a	a	b	b	b	a	b	b	b	a
ABMR_12D04	a	a	b	a	a	a	a	b	a	b	a	b	b	b	b	b	b	a	a	a	a	a	a	a	a	b	a	a	a	a	a	b	b	a	a	b	a	b	a	a	b	a	a	b	a	b	b	a	a
ABMR_12D05	a	b	a	a	b	b	a	a	a	a	b	a	a	b	a	b	-	b	a	b	b	b	a	b	a	a	b	a	b	b	b	b	b	a	b	a	a	a	b	a	b	b	b	a	a	b	b	a	b
ABMR_12F19**	a	a	b	b	b	b	a	b	a	a	a	b	a	b	b	b	b	b	b	b	b	a	-	b	a	b	b	a	a	b	b	a	a	b	b	a	a	a	b	b	a	a	b	b	b	b	b	b	b
ABMR_12F22	b	a	b	a	b	a	a	b	a	b	a	b	b	b	b	a	b	b	b	a	b	a	b	b	b	b	b	a	b	a	b	b	a	a	a	b	b	b	b	a	a	a	b	b	a	a	b	a	b
ABMR_12H10	b	a	b	a	b	b	b	b	a	a	b	a	b	b	b	b	b	b	a	a	b	b	a	b	a	a	b	a	a	a	a	b	a	a	a	b	b	a	a	b	a	b	a	b	a	b	b	b	a
ABMR_12I01	b	b	b	a	b	b	b	a	a	b	a	b	b	b	b	b	a	b	a	a	b	a	b	a	a	a	a	a	a	a	b	a	a	a	a	b	b	a	b	a	a	a	b	b	a	b	a	a	b
ABMR_12K16	b	a	b	a	b	a	a	b	a	b	a	a	b	b	b	a	b	b	b	a	b	a	b	b	b	b	b	a	b	a	b	b	a	a	a	b	b	b	b	a	a	a	-	b	a	a	-	a	b
ABMR_12O09	a	b	a	b	b	a	a	a	b	a	a	a	-	b	b	b	a	-	b	b	b	b	a	b	b	a	b	a	b	b	b	-	a	b	a	b	a	a	b	b	a	a	a	a	b	b	b	b	a
ABMR_12O21	a	a	a	a	b	b	a	a	b	a	a	a	a	a	b	b	b	b	a	b	b	b	a	b	b	a	b	a	b	b	a	b	b	a	b	b	a	a	b	a	b	b	b	a	a	b	b	a	b
ABMR_12P05	b	a	a	a	a	b	a	b	b	a	b	a	b	b	b	a	b	a	a	a	a	a	a	a	a	b	a	b	b	b	a	a	b	b	a	b	b	a	a	b	a	b	a	b	a	b	b	b	a
ABMR_12P22*******	b	a	b	a	b	a	a	a	a	a	b	a	a	a	a	a	a	a	a	a	a	a	a	a	b	b	a	a	a	a	a	a	a	a	b	a	a	a	b	a	a	a	a	a	b	a	b	a	b
ABMR_13A09	a	a	a	a	b	b	a	a	b	a	a	a	a	a	b	b	b	b	a	b	b	b	a	b	b	a	b	a	b	b	a	b	b	a	b	b	a	a	b	a	b	b	b	a	a	b	b	a	b
ABMR_13A18	a	a	b	a	a	a	a	b	a	b	a	b	b	b	b	b	b	a	a	a	a	a	a	a	a	-	a	a	a	a	a	b	b	a	a	b	a	b	a	a	b	a	a	b	a	b	b	a	a
ABMR_13C13	a	b	a	a	a	a	a	b	b	b	a	a	b	b	b	a	b	b	a	a	a	a	b	a	b	b	a	a	b	a	b	a	b	a	a	a	a	a	b	b	a	a	a	a	a	a	b	a	b
ABMR_13C19	b	a	a	a	a	a	b	b	a	a	b	b	b	b	a	a	b	b	a	a	a	b	a	a	b	a	a	b	b	b	b	b	b	a	b	b	a	a	b	b	b	a	a	a	b	b	a	a	b
ABMR_13D09	b	a	b	a	b	a	a	b	a	b	a	a	b	b	b	a	-	b	b	a	b	a	b	b	b	b	b	a	b	a	b	b	a	a	a	b	b	b	b	a	a	a	b	b	a	a	b	a	b
ABMR_13F03	a	a	b	b	a	a	a	b	a	a	b	a	a	b	a	b	b	a	b	a	a	a	b	b	b	a	b	a	a	b	b	a	b	a	a	b	a	b	a	a	a	a	b	a	a	b	b	b	a
ABMR_13F23	a	b	b	a	b	a	a	a	b	a	b	a	b	a	b	a	b	a	a	a	a	b	a	b	b	a	b	a	b	a	b	a	b	b	a	b	b	a	-	b	b	a	a	a	b	a	a	b	a
ABMR_13H16	b	b	a	a	a	b	b	b	b	a	b	a	a	a	a	a	b	a	a	b	a	a	a	b	b	b	a	b	a	b	a	b	a	b	a	b	a	a	-	b	b	b	a	b	a	a	a	a	a
ABMR_13I08	a	a	a	a	b	b	b	b	a	b	a	-	a	a	b	b	a	b	a	a	a	a	b	b	b	a	a	b	b	a	a	a	b	b	b	a	b	a	a	a	b	b	b	b	a	b	b	b	a
ABMR_13J19	b	b	b	a	b	a	a	a	b	b	b	a	a	a	b	a	a	b	b	b	a	b	a	b	b	b	b	a	a	a	a	a	a	a	b	a	b	a	b	-	-	a	b	b	b	-	b	a	b
ABMR_13K01	a	b	-	a	b	b	a	b	a	b	a	a	b	b	a	a	a	b	a	b	b	a	a	a	b	a	b	a	b	a	b	a	a	a	a	b	b	b	b	a	a	b	a	b	b	a	b	b	a
ABMR_13K08	a	a	b	b	a	a	a	b	a	a	b	a	a	b	a	b	b	a	b	a	a	a	b	b	b	a	b	a	a	a	b	a	b	a	a	b	a	b	a	a	a	a	b	a	a	b	b	b	a
ABMR_13L11	b	a	b	a	a	a	a	b	a	b	a	b	b	b	b	a	b	-	a	a	b	b	a	b	a	a	a	b	b	b	b	a	a	a	a	b	b	a	b	a	b	b	b	a	a	a	b	a	a
ABMR_13M03	a	a	b	b	a	a	a	b	a	b	b	a	a	a	a	a	b	b	a	a	a	b	b	b	a	b	b	a	a	a	b	a	b	a	a	b	b	b	a	b	b	a	a	b	a	b	a	b	a
ABMR_13M05	a	a	b	a	a	a	a	b	a	b	a	b	b	b	b	b	b	a	a	a	a	a	a	a	a	b	a	a	a	a	a	b	b	a	a	b	a	b	a	a	b	a	a	b	a	b	b	a	a
ABMR_13M15	a	a	a	a	b	b	a	a	b	a	a	a	a	a	b	b	b	b	a	b	b	b	a	b	b	a	b	a	b	b	a	b	b	a	b	b	a	a	b	a	b	b	-	a	a	b	b	a	b
ABMR_13O03	a	a	a	a	b	b	b	b	a	b	a	a	a	a	a	b	a	b	a	a	a	a	b	b	b	a	a	b	b	a	a	a	b	b	b	a	a	a	a	a	b	b	b	b	a	b	b	b	a
ABMR_13P06	a	b	b	b	a	a	b	b	b	a	b	a	b	b	b	a	b	b	a	a	a	b	a	a	b	a	a	b	a	a	b	b	a	a	a	b	a	a	b	a	a	b	b	b	b	a	a	b	a
ABMR_14D06	a	a	a	a	b	b	b	b	b	a	b	a	a	b	b	b	a	b	b	a	a	a	b	b	a	a	a	b	b	b	a	b	a	b	b	a	b	a	a	a	b	b	b	b	b	b	b	b	a
ABMR_14E17	a	a	b	a	a	b	b	b	a	a	b	a	a	b	b	b	b	b	a	a	a	b	a	b	b	a	a	a	a	a	a	b	b	a	b	a	b	a	a	a	b	a	b	b	a	a	a	a	b
ABMR_14J13	a	b	b	b	a	a	b	b	b	a	a	a	a	b	b	a	b	b	a	a	a	b	a	a	b	a	a	b	a	a	b	b	a	a	b	b	a	a	b	a	a	b	b	b	b	a	a	b	a
ABMR_14L12	a	b	a	a	b	b	a	b	a	b	a	a	b	b	a	a	a	b	a	b	a	a	a	a	b	a	b	a	b	a	b	a	a	a	a	b	b	b	b	a	a	b	a	b	b	a	b	b	a
ABMR_14L23	a	b	b	a	b	a	a	a	b	a	b	a	-	a	b	a	b	a	a	a	a	b	a	b	b	a	b	a	b	a	b	a	b	b	a	b	b	-	b	b	b	a	a	a	b	a	a	b	a
ABMR_14M03	a	a	b	a	a	b	a	b	b	a	b	a	a	-	b	a	a	b	a	a	b	a	a	b	a	a	a	a	a	b	b	b	a	a	b	a	a	b	b	a	b	a	b	b	a	b	a	a	a
ABMR_14M05	b	a	a	b	a	a	a	a	b	-	a	a	a	a	b	b	a	a	b	a	a	a	b	b	b	b	b	a	b	a	b	b	a	a	-	b	b	b	b	a	a	a	b	b	a	a	a	a	b
ABMR_14M13	a	a	b	a	a	-	a	b	a	b	a	b	b	b	b	b	b	a	a	a	a	a	a	a	a	b	a	a	a	a	-	b	b	a	a	b	a	b	a	a	b	a	a	b	a	b	b	a	a
ABMR_14M17	b	b	a	a	a	b	a	a	a	b	a	a	b	a	a	b	a	a	b	a	a	a	b	b	b	b	b	a	-	-	-	b	b	b	a	a	b	b	b	b	a	a	a	b	a	b	b	b	a
ABMR_14P09	b	b	b	b	a	a	a	b	b	a	b	a	b	a	b	a	b	b	a	a	b	b	a	b	b	a	a	b	b	a	b	a	a	a	a	b	b	a	b	a	b	b	b	a	b	a	a	a	a
ABMR_14P21*	a	a	b	b	b	b	a	b	a	a	a	b	a	b	b	b	b	b	b	b	b	a	a	b	a	b	b	a	a	b	b	a	a	b	b	a	a	a	b	b	a	a	b	b	b	b	b	b	b
ABMR_14P23	a	a	a	b	b	a	b	b	b	a	b	b	b	a	a	b	a	b	a	b	b	b	a	b	b	b	a	b	b	b	a	b	a	a	a	a	b	a	b	a	b	b	b	a	b	a	b	b	a
ABMR_15A21	a	b	a	b	a	a	b	a	a	a	b	a	a	a	a	a	a	b	b	b	b	b	a	b	b	b	a	b	b	a	b	a	a	b	a	b	b	b	b	b	a	b	a	a	a	b	a	a	b
ABMR_15B20	a	b	a	a	b	b	a	b	b	b	a	a	a	b	a	a	b	a	b	a	b	a	a	a	b	a	b	a	b	a	b	a	b	a	a	b	b	b	b	a	a	b	a	b	b	a	b	b	a
ABMR_15B24	b	b	b	a	b	b	a	b	a	b	a	b	b	b	b	a	b	b	b	a	b	a	b	a	b	a	a	a	a	a	b	-	a	a	a	b	b	a	b	a	a	-	-	b	a	-	a	a	b
ABMR_15C20	a	a	b	a	a	a	a	b	a	b	a	b	b	b	b	b	b	a	a	a	a	a	a	a	a	b	a	a	a	a	a	b	b	a	a	b	a	b	a	a	b	a	a	b	a	b	b	a	a
ABMR_15D24*	a	a	b	b	b	b	a	b	a	a	a	b	a	b	b	b	b	b	b	b	b	a	-	b	a	b	b	a	a	b	b	a	a	b	b	a	a	a	b	b	a	a	b	b	b	b	b	b	b
ABMR_15E06	b	b	b	a	b	a	a	b	a	b	a	b	b	b	b	a	b	b	b	a	b	a	b	b	b	b	b	a	b	a	b	b	a	a	a	b	b	a	b	a	a	b	a	b	a	a	b	a	b
ABMR_15E18	b	b	b	b	b	a	b	a	b	b	b	a	a	a	b	b	a	b	b	a	b	a	b	b	a	a	a	b	b	a	b	a	b	b	b	a	a	a	a	b	b	b	a	b	b	a	a	a	b
ABMR_15I13*	a	a	b	-	b	b	a	b	-	a	a	b	a	b	b	b	b	b	b	b	b	-	a	b	a	b	-	a	a	b	b	a	a	b	b	a	a	a	b	b	a	-	b	b	b	b	-	b	b
ABMR_15I16	a	b	b	a	b	a	a	a	b	a	b	a	b	a	-	a	b	a	a	a	a	b	a	b	b	a	b	a	b	a	b	a	b	b	a	b	b	a	b	b	b	a	a	a	b	a	a	b	a
ABMR_15I21	b	a	b	b	b	b	a	b	a	a	b	a	b	b	a	b	b	a	a	a	a	a	a	a	b	b	a	a	a	a	a	a	b	a	b	a	a	a	b	a	b	a	-	a	b	b	b	a	b
ABMR_15I22	a	a	a	a	a	b	a	b	b	a	b	a	a	a	a	b	a	a	b	a	a	a	b	b	b	a	b	a	a	b	a	b	a	b	a	b	b	a	a	-	a	b	a	b	a	b	b	b	a
ABMR_15I24	a	a	b	b	b	b	a	b	a	a	a	b	a	b	b	b	b	b	b	b	b	a	a	b	a	b	b	a	a	b	b	a	a	b	b	a	a	a	b	b	a	a	b	b	b	-	-	b	b
ABMR_15L04	b	a	b	a	b	a	a	b	a	b	a	a	b	b	b	a	b	b	b	a	b	a	b	b	b	b	b	a	b	a	b	b	a	a	a	b	b	b	b	a	a	a	b	b	a	a	b	a	b
ABMR_15O18**	b	b	a	a	a	a	b	a	a	a	a	a	a	b	a	b	a	b	a	b	b	b	a	a	a	b	a	a	a	a	a	a	a	a	a	b	a	a	a	a	b	a	b	a	a	a	a	b	a
ABMR_16A17	a	a	b	a	a	b	b	b	a	a	b	a	a	b	b	b	b	b	a	a	a	b	-	b	b	a	a	a	a	b	a	b	b	a	b	a	b	a	a	a	b	a	b	b	a	a	a	a	b
ABMR_16C07	a	b	b	a	b	a	a	a	b	a	b	a	b	a	b	a	b	a	a	a	a	b	a	b	b	a	b	a	b	a	b	a	b	b	a	b	b	a	b	b	b	a	a	a	b	a	a	b	a
ABMR_16D05	b	b	a	a	a	b	b	b	b	a	b	a	a	a	a	a	b	a	a	b	a	a	a	b	b	b	a	b	a	b	a	b	a	b	a	b	a	a	a	b	b	b	a	b	a	a	a	a	a
ABMR_16D22	b	a	b	b	b	a	a	b	a	a	b	a	b	b	a	b	b	a	a	a	a	a	a	a	b	b	a	a	a	a	a	a	b	a	b	a	a	a	b	a	b	a	a	a	b	b	b	a	b
ABMR_16F17	a	a	b	b	a	a	b	b	a	a	b	a	a	a	b	a	a	b	b	b	b	b	a	b	b	a	a	b	b	b	b	a	b	b	a	b	b	b	b	b	a	b	a	a	b	-	a	a	b
ABMR_16G02*******	b	a	b	a	b	a	a	a	a	a	b	a	a	a	a	a	a	a	a	a	a	a	a	a	b	b	a	a	a	a	a	a	a	a	b	a	a	a	b	a	a	a	a	a	b	a	b	a	b
ABMR_16G16	a	a	a	b	a	a	b	b	a	b	a	a	b	b	a	a	b	a	b	b	b	a	b	b	b	b	b	a	a	b	a	a	b	b	b	b	a	a	b	b	a	a	a	a	b	b	a	a	b
ABMR_16I14	b	a	b	b	b	-	a	b	a	a	b	a	b	b	a	b	b	a	a	a	a	a	a	a	b	b	a	a	a	a	a	a	b	a	b	a	a	a	b	a	b	a	a	a	b	b	b	a	b
ABMR_16J20	b	b	b	a	b	a	a	b	a	b	a	b	b	b	b	a	b	b	b	a	b	a	b	b	b	b	b	a	b	a	b	b	a	a	a	b	b	a	b	a	a	b	a	b	a	a	b	a	b
ABMR_16K14*	a	b	a	b	a	a	b	a	a	a	a	a	a	b	a	b	a	b	a	b	b	b	a	a	a	b	a	a	a	a	a	a	a	a	a	b	a	a	a	b	b	a	a	b	a	a	a	b	a
ABMR_16L11	b	a	b	a	a	b	a	b	b	a	b	a	b	b	b	b	b	a	a	a	b	a	a	a	a	b	a	b	b	b	a	a	b	b	b	a	b	a	b	b	b	b	a	b	a	b	b	b	a
ABMR_16P17	a	b	b	a	b	a	a	a	b	a	b	a	b	a	b	a	b	a	a	a	a	b	a	b	b	a	b	a	b	a	b	a	b	b	a	b	b	a	b	b	b	a	a	a	b	a	a	b	a
ac-0001	a	b	b	a	b	a	a	a	b	a	b	b	b	a	b	a	-	b	a	a	a	b	a	b	b	a	b	a	a	a	b	a	b	b	b	b	b	a	b	b	b	a	a	b	b	a	a	b	a
ac-0002	a	a	b	a	a	b	b	b	a	a	b	-	b	b	b	b	b	b	a	a	a	b	a	b	b	a	a	a	a	a	a	b	a	a	b	a	b	a	a	a	b	a	b	a	a	a	a	a	b
ac-0006	b	b	b	b	b	a	b	a	b	b	b	a	a	a	a	b	a	a	b	a	a	b	a	a	b	a	a	b	b	a	b	a	a	a	b	a	a	b	a	b	b	a	a	b	b	a	a	b	b
ac-0007	a	a	a	a	a	b	b	b	a	a	a	a	b	b	b	b	b	b	a	b	b	a	a	b	b	a	b	a	b	b	b	b	b	b	a	a	a	b	a	b	b	a	a	a	a	a	b	b	a
AEATMpAG_106	a	b	b	a	a	b	b	b	a	b	a	a	b	a	a	b	b	a	b	a	a	a	a	b	b	a	a	a	a	a	b	b	a	b	b	a	b	a	b	b	b	a	a	a	a	a	b	a	b
AEATMpAG_124	b	a	a	b	a	a	a	a	b	b	a	b	a	b	b	b	a	b	b	b	a	b	a	b	a	a	b	a	b	b	a	b	a	a	a	a	b	b	b	b	a	a	a	b	b	b	a	b	a
AEATMpAG_126	a	b	a	b	a	a	b	a	a	a	b	a	a	a	a	a	a	b	b	b	b	b	a	b	b	b	a	b	b	b	b	a	a	b	a	b	b	b	b	b	a	b	a	a	a	b	a	a	b
AEATMpAG_143	a	b	b	a	a	b	a	b	a	b	b	a	b	b	a	a	a	a	a	b	a	a	b	a	b	b	b	a	a	a	b	a	a	b	a	b	a	b	b	a	b	b	a	b	b	b	b	b	a
AEATMpAG_155	b	a	b	a	b	b	a	a	b	a	a	a	a	b	a	a	b	b	a	b	a	a	a	b	b	a	b	a	b	b	b	b	b	b	b	a	b	b	a	b	b	-	a	b	b	b	b	a	b
AEATMpAG_208	a	a	b	b	a	b	b	a	a	b	b	a	a	b	b	b	b	b	a	a	b	b	b	b	b	b	a	a	a	a	a	a	b	b	b	a	b	a	b	a	a	b	a	b	a	b	a	b	b
AEATMpAG_225	a	b	a	b	b	a	a	a	b	a	a	a	b	b	b	b	a	a	b	b	b	a	a	b	b	a	b	a	b	b	b	b	a	b	a	b	a	a	b	b	a	a	a	a	b	b	b	b	a
AEATMpAG_230	a	a	b	b	b	a	b	a	a	b	a	a	b	b	b	b	b	a	b	a	a	a	a	b	b	b	a	a	b	b	a	a	a	a	b	b	a	a	b	a	b	a	a	a	b	a	a	a	a
AEATMpAG_328*	a	a	b	b	b	b	a	b	a	a	a	b	a	b	b	b	b	b	b	b	b	a	a	b	a	b	b	a	a	b	b	a	a	b	b	a	a	a	b	b	a	a	b	b	b	b	b	b	b
AEATMpAG_362	a	b	b	a	a	b	a	b	a	b	b	a	b	b	a	a	a	a	a	b	a	a	b	a	b	b	b	a	a	a	b	a	a	b	a	b	a	b	b	a	b	-	a	b	b	b	b	b	a
AEATMpAG_514	a	b	a	a	b	b	a	a	b	a	b	a	a	b	b	b	b	b	a	b	b	b	b	b	a	a	b	a	b	b	a	b	b	-	b	b	a	a	b	a	b	b	b	a	a	b	b	a	b
AEATMpAG_71	a	b	b	-	b	b	b	b	b	b	b	b	b	b	b	a	b	a	b	a	a	a	a	b	b	a	a	a	b	a	b	b	a	b	b	a	b	a	b	b	b	a	a	a	a	a	b	a	b
AEATMpAG_82	a	b	b	b	b	a	a	a	b	b	a	a	b	b	b	b	b	a	b	b	b	a	a	b	b	a	b	a	b	a	b	b	a	b	a	b	b	a	b	a	b	a	b	a	a	b	a	b	a
AEATMpCA_145	b	a	b	a	b	b	b	a	b	b	a	b	b	b	b	b	a	b	a	b	b	a	a	a	a	a	a	a	a	a	b	a	b	a	a	b	-	a	b	a	a	a	b	a	a	b	a	a	b
AEATMpCG_106	a	a	a	a	b	b	b	b	a	b	a	a	a	a	b	b	a	b	a	a	a	a	b	b	b	a	a	b	b	a	a	a	b	b	b	a	b	a	a	a	b	b	b	b	a	b	b	b	a
AEATMpCG_141	a	b	b	b	b	a	a	a	b	b	a	a	b	a	b	b	b	a	b	b	b	a	a	b	b	a	b	a	b	a	b	b	a	b	a	b	b	a	b	a	b	a	b	a	a	b	a	b	a
AEATMpCG_146	a	b	a	b	b	a	b	a	b	a	a	a	a	b	a	b	b	a	b	a	a	b	a	a	b	a	a	b	b	b	b	b	b	b	b	b	b	b	a	a	b	b	a	a	b	a	a	b	b
AEATMpCG_197	a	b	a	a	a	a	b	b	b	b	b	a	a	a	a	b	a	b	b	a	a	b	b	b	b	a	b	a	a	a	b	b	b	a	b	a	b	a	a	a	b	a	b	a	a	a	b	a	b
AEATMpCG_201	b	b	a	a	a	b	b	b	b	a	b	a	a	a	a	a	b	a	a	b	a	a	a	b	b	b	b	b	a	b	a	b	a	b	a	b	a	b	a	b	b	b	a	b	b	a	a	a	a
AEATMpCG_279	b	b	b	a	a	b	a	a	a	b	a	a	b	a	a	b	a	a	b	a	a	a	b	b	b	b	b	a	b	a	a	b	b	b	a	a	b	b	b	b	a	a	a	b	a	b	b	b	a
AEATMpCG_311	b	b	a	a	a	b	b	b	b	a	b	a	a	a	a	a	b	a	a	b	a	a	a	b	b	b	a	b	a	b	a	b	a	b	a	b	a	a	a	b	b	b	a	b	a	a	a	a	a
AEATMpCG_331	b	b	b	b	b	a	a	a	b	b	a	a	b	b	b	b	a	a	b	b	b	a	a	b	b	a	b	a	b	b	b	b	a	b	a	b	a	a	b	a	a	a	b	a	a	b	b	b	a
AEATMpCG_561	a	-	-	a	a	a	b	a	b	b	b	a	a	a	a	b	b	b	b	a	a	b	b	b	b	a	b	a	a	a	b	b	b	a	b	a	a	a	b	b	b	a	b	a	-	a	b	a	a
AEATMpCG_573	-	-	a	a	b	b	a	b	a	b	a	a	a	b	a	a	b	b	a	a	b	a	-	a	b	a	b	a	b	a	b	a	a	a	a	b	b	b	b	a	a	b	a	b	b	a	b	b	a
AEATMpCG_60	b	a	a	a	a	b	a	b	b	a	b	a	b	b	b	a	b	a	a	a	a	a	a	a	a	b	a	b	b	b	a	a	b	b	a	b	b	a	a	b	a	b	a	b	a	b	b	b	a
AEATMpCG_600	a	b	a	a	b	b	a	a	b	a	b	a	a	b	a	b	b	b	a	b	b	b	a	b	a	a	b	a	b	b	a	b	b	-	b	b	a	a	b	a	b	b	b	a	a	b	b	a	b
AEGAMpAC_114*	b	a	a	a	b	a	a	b	a	a	b	a	b	a	b	b	b	a	a	b	a	b	a	b	a	a	a	a	a	a	b	b	a	a	a	b	a	a	a	b	a	-	a	b	a	b	b	b	a
AEGAMpAC_147	a	a	a	b	a	a	b	b	a	b	a	a	b	b	a	a	a	a	b	b	b	a	b	b	b	b	b	a	a	b	a	a	b	b	b	b	a	a	b	b	a	a	a	a	b	b	a	a	b
AEGAMpAC_167	a	b	a	a	b	b	a	b	a	b	a	a	a	b	a	a	a	b	a	a	b	a	a	a	b	a	b	a	b	a	b	a	a	a	a	b	b	b	b	a	a	b	a	b	b	a	b	b	a
AEGAMpAC_176	a	b	b	b	b	a	b	a	a	a	b	b	b	a	b	a	a	b	a	a	a	b	a	b	a	a	b	a	a	a	b	a	a	b	b	b	b	a	b	b	b	a	a	b	a	a	a	b	a
AEGAMpAC_212	a	b	a	b	b	a	b	a	b	a	a	a	a	b	a	b	b	b	b	a	a	b	a	b	b	a	a	b	b	b	b	b	a	b	b	b	b	b	a	a	b	b	a	a	b	a	a	b	b
AEGAMpAC_213	a	b	a	b	b	a	b	a	b	a	a	a	a	b	a	b	b	b	b	a	a	-	a	b	-	a	a	b	b	b	b	a	b	b	b	b	b	b	a	a	b	b	a	a	b	a	a	b	b
AEGAMpAC_221	a	b	a	a	b	b	a	b	a	b	a	a	b	b	a	a	a	b	a	b	a	a	a	a	b	a	b	a	-	a	b	a	a	a	a	b	b	b	b	a	a	b	a	b	b	a	b	b	a
AEGAMpAC_223	b	a	b	a	a	a	a	b	a	b	a	b	b	a	b	a	a	b	a	a	b	b	a	b	a	a	a	b	b	b	b	a	a	a	a	b	b	a	b	a	b	b	b	a	a	a	b	a	a
AEGAMpAC_263	a	b	b	a	b	a	a	a	b	a	b	b	b	a	b	a	a	b	a	a	a	b	a	b	b	a	b	a	a	a	b	a	b	b	b	b	b	a	b	b	b	a	a	b	b	a	a	b	a
AEGAMpAC_289	a	b	a	a	b	b	b	a	a	a	b	a	a	a	a	b	b	b	a	b	b	b	a	a	a	a	b	a	b	a	b	a	b	a	b	a	a	a	b	b	a	a	b	a	a	b	b	b	a
AEGAMpAC_300	b	b	a	a	b	b	b	a	b	a	b	b	a	a	a	b	b	b	a	b	b	b	a	a	a	a	b	a	a	a	b	a	b	a	b	a	a	a	b	b	a	a	b	a	a	b	b	b	a
AEGAMpAC_356	b	b	b	b	b	a	b	a	b	b	b	a	a	a	b	b	b	b	b	a	b	a	b	b	a	a	a	b	b	a	b	a	b	b	b	a	a	a	a	b	b	b	a	b	b	a	a	a	b
AEGAMpAC_365****	a	a	b	a	a	a	a	b	a	b	a	a	a	a	b	b	b	a	a	a	a	a	a	a	a	b	a	a	a	a	a	b	b	a	a	b	a	b	a	a	b	a	a	b	a	b	b	a	a
AEGAMpAC_513	a	b	a	a	b	b	a	a	b	a	b	a	a	b	b	b	b	b	a	b	b	b	a	b	a	a	b	a	b	b	a	b	-	a	a	a	a	a	b	a	b	b	b	a	a	b	b	a	b
AEGAMpAC_529	b	a	a	a	a	b	b	a	a	b	a	b	b	a	a	a	a	b	a	b	a	b	a	a	a	a	a	b	b	b	b	a	b	b	b	a	b	b	b	b	b	a	b	a	a	a	a	a	a
AEGAMpAC_558	a	b	a	b	b	a	b	a	b	b	a	b	a	b	a	b	b	a	b	a	a	b	a	a	b	a	b	a	b	b	b	b	b	b	b	b	b	b	a	a	b	b	a	a	b	a	a	b	b
AEGAMpAC_69	a	a	a	a	a	b	a	a	b	a	b	b	b	b	b	b	b	a	b	a	a	b	a	a	b	b	a	b	a	a	b	b	a	a	a	a	b	b	a	a	a	b	b	a	b	a	a	b	a
AEGAMpAG_123	a	b	b	b	a	b	a	a	a	b	b	b	a	a	a	a	b	b	a	a	a	b	b	b	a	a	a	b	a	a	b	a	b	a	b	b	b	b	b	b	a	a	a	b	a	b	a	b	a
AEGAMpAG_137	a	a	b	b	a	a	a	b	a	b	b	a	a	a	a	a	b	b	a	a	a	b	b	b	a	b	b	a	a	a	b	a	-	a	a	b	b	b	a	b	b	a	a	b	a	b	a	b	a
AEGAMpAG_146	a	a	b	a	a	a	a	b	a	b	a	b	b	b	b	b	a	a	a	a	a	a	a	a	a	b	a	a	a	a	a	b	b	a	a	b	a	b	a	a	b	a	a	b	a	b	b	a	a
AEGAMpAG_174	b	a	b	a	b	b	b	b	a	a	b	a	b	b	b	b	b	b	a	b	b	b	a	b	a	a	b	a	a	a	b	b	a	a	a	b	b	a	a	b	a	b	a	b	a	b	b	b	a
AEGAMpAG_199	a	a	a	b	a	a	b	a	a	a	b	b	a	b	b	b	b	b	a	a	b	b	a	b	a	b	a	b	a	a	a	a	a	b	b	b	b	a	a	b	a	a	a	b	a	b	b	a	b
AEGAMpAG_217	a	a	b	a	a	b	a	b	b	a	b	a	a	b	b	a	b	b	a	a	b	a	a	b	a	a	a	a	a	b	b	b	a	a	b	a	a	b	b	a	b	a	b	b	b	b	a	a	a
AEGAMpAG_276	a	b	a	a	b	b	a	a	b	a	b	a	a	b	a	b	b	b	a	b	b	b	a	b	a	a	b	a	b	b	a	b	b	a	b	b	a	a	b	a	b	b	b	a	a	b	b	a	b
AEGAMpAG_300	b	a	b	a	b	b	b	a	b	b	a	b	b	b	b	b	b	b	a	b	b	a	a	a	a	a	a	a	a	a	b	a	b	a	a	b	b	a	b	a	a	a	b	a	a	b	a	a	b
AEGAMpAG_314	a	b	b	a	a	b	a	b	a	b	b	a	b	b	a	a	a	a	a	b	a	a	b	a	b	b	b	a	a	a	b	a	a	b	a	b	a	b	b	a	b	b	a	b	b	b	b	b	a
AEGAMpAG_337	a	a	b	b	a	a	b	b	-	b	a	a	b	b	b	a	a	a	b	a	a	a	a	b	b	b	b	a	b	b	a	a	a	a	b	a	a	a	b	a	b	b	a	a	b	a	a	a	a
AEGAMpAG_362	b	b	b	b	b	a	a	a	b	b	a	b	a	b	a	a	a	a	b	a	b	a	b	a	b	a	a	a	b	a	a	a	a	a	b	a	b	b	b	b	a	a	a	a	b	a	a	b	b
AEGAMpAG_395****	a	a	b	a	a	a	a	a	a	a	a	a	a	b	b	a	a	a	b	a	a	b	a	b	a	a	a	b	a	a	b	a	a	b	b	a	b	a	b	a	b	a	a	a	a	b	a	b	a
AEGAMpAG_457	-	a	a	b	a	a	b	a	a	a	b	a	a	a	a	b	b	b	b	b	b	a	a	b	b	a	b	a	b	a	b	b	a	b	a	b	b	b	b	b	a	b	a	a	a	a	a	a	b
AEGAMpAG_511	a	b	a	b	b	a	b	b	b	b	a	b	a	b	a	b	a	a	b	a	a	b	-	a	b	a	b	a	b	b	b	b	b	b	b	a	b	b	a	a	b	b	a	a	b	a	a	b	b
AEGAMpAG_515	a	b	a	a	b	b	a	a	a	a	b	a	a	b	a	b	b	b	a	b	b	b	-	b	a	a	b	a	b	b	b	b	b	a	b	a	a	a	b	a	b	b	b	a	a	b	b	a	b
AEGAMpAG_534	b	b	b	b	a	b	a	a	a	b	b	b	a	a	b	a	a	a	b	a	a	b	a	b	a	a	a	b	a	a	b	a	a	a	b	b	b	b	b	b	a	a	a	b	a	b	a	b	a
AEGAMpAG_672	b	b	a	b	b	b	b	b	b	-	b	a	b	a	a	a	b	b	a	b	a	b	a	b	b	b	a	b	a	b	a	b	a	a	a	b	a	a	b	b	b	b	a	a	a	a	a	b	a
AEGAMpAG_85	a	b	b	a	b	a	a	b	a	b	a	b	b	b	b	a	b	b	b	a	b	a	b	b	b	b	b	a	b	a	b	b	a	a	a	b	b	a	b	b	a	b	a	b	a	a	b	a	b
AEGAMpCA_108	a	a	b	b	a	a	a	a	a	b	b	b	a	a	a	a	b	b	a	a	a	b	b	b	a	a	a	b	a	a	b	a	b	a	b	b	b	b	a	b	a	a	a	b	a	b	a	b	a
AEGAMpCA_117	a	b	a	a	b	a	a	b	a	b	a	a	b	b	a	a	b	b	a	a	b	a	a	a	a	a	-	a	b	a	b	a	a	a	a	b	b	b	b	a	a	b	a	b	b	a	b	b	a
AEGAMpCA_122	b	a	b	a	b	b	b	a	b	b	a	b	b	b	b	b	a	b	a	b	b	a	a	a	a	a	a	a	a	a	b	a	b	a	a	b	b	a	b	a	a	a	b	a	a	b	a	a	b
AEGAMpCA_150	b	a	b	b	b	a	a	b	a	a	b	a	b	b	a	b	b	a	a	a	a	a	a	a	b	b	a	a	a	a	a	a	b	a	b	a	a	a	b	a	b	a	a	a	b	b	-	a	b
AEGAMpCA_182	a	b	b	b	a	-	a	a	a	b	b	b	a	a	b	a	b	a	b	a	a	b	a	b	a	a	a	b	a	a	b	a	a	a	b	b	b	b	b	b	a	a	a	b	a	b	a	b	a
AEGAMpCA_239	b	a	b	a	b	a	a	b	a	b	a	b	b	b	b	a	b	b	b	a	b	a	b	b	b	b	b	a	b	a	b	b	a	a	a	b	b	b	b	a	a	b	a	b	a	a	b	a	b
AEGAMpCA_265	b	a	a	a	a	b	b	b	a	a	b	b	a	a	a	b	a	b	a	a	a	b	a	b	b	b	b	a	a	b	b	b	b	b	a	a	b	b	a	b	b	a	a	b	a	a	a	a	b
AEGAMpCA_321	b	b	b	b	b	a	-	a	b	b	b	a	a	a	b	b	a	b	b	a	b	a	b	-	a	a	a	b	b	b	b	a	b	b	b	a	a	a	a	b	b	b	a	b	b	a	a	a	b
AEGAMpCA_339	b	a	b	a	a	a	a	b	a	b	a	b	b	b	b	a	b	b	a	a	b	b	a	b	a	a	a	b	b	b	b	a	a	a	b	b	b	a	b	a	b	b	b	a	a	a	b	a	a
AEGAMpCA_398	a	a	a	a	b	b	b	b	a	a	a	a	b	b	b	b	b	b	a	b	b	b	a	-	a	a	-	a	b	b	b	b	b	a	a	a	b	a	a	b	a	a	a	b	a	a	b	b	a
AEGAMpCA_449	a	a	b	a	a	-	a	a	a	a	a	b	a	b	a	a	b	a	b	b	a	b	a	b	a	a	a	b	a	a	b	a	a	b	a	b	b	b	b	b	b	a	b	b	a	b	a	b	b
AEGAMpCA_454	b	a	a	b	b	b	b	b	b	a	b	a	b	a	a	a	b	b	a	b	a	b	a	b	b	b	a	b	a	b	a	b	a	a	a	b	a	a	b	b	b	b	a	a	a	a	a	b	a
AEGAMpCA_474	b	a	b	a	a	a	a	b	a	b	a	b	b	b	b	a	b	b	a	-	b	b	a	b	a	a	a	b	b	b	b	a	a	a	b	a	b	a	b	a	b	b	b	a	a	a	b	a	b
AEGAMpCA_506	a	b	a	b	a	a	b	a	a	a	b	a	a	a	a	a	a	b	b	b	b	b	a	b	b	b	a	b	b	a	b	a	a	b	a	b	b	b	b	b	a	b	a	a	a	b	a	a	b
AEGAMpCA_73	a	b	b	b	a	b	a	a	a	b	b	b	a	a	b	a	b	a	b	a	a	b	a	b	a	a	a	b	a	a	b	a	a	a	b	b	b	b	b	b	a	a	a	b	a	b	a	b	a
AEGAMpCA_80	b	a	a	a	b	b	b	b	a	a	a	a	b	b	b	b	b	b	a	b	b	b	a	b	a	a	b	a	a	b	b	b	a	a	a	b	b	a	a	b	a	b	a	b	a	b	b	b	a
AEGAMpCA_87	b	a	a	b	a	a	a	a	b	b	a	a	a	b	b	b	a	a	b	b	a	b	a	b	a	b	b	a	b	b	a	b	a	a	a	a	b	b	b	a	a	a	b	b	b	b	a	a	b
AEGAMpCC_102	a	b	a	a	b	b	b	b	b	b	a	a	a	b	a	b	b	a	b	a	b	a	a	a	b	a	b	a	b	a	b	a	b	a	a	b	b	b	b	a	a	b	a	b	b	a	b	b	a
AEGAMpCC_142	a	b	b	b	b	a	a	a	b	a	a	a	b	a	b	b	a	a	b	b	b	a	a	b	b	a	b	a	b	b	b	b	a	b	a	b	a	a	b	a	b	a	b	a	a	b	b	b	a
AEGAMpCC_149	a	b	b	a	a	b	b	b	a	b	b	a	b	b	b	b	b	b	a	a	a	a	a	b	b	a	a	a	a	a	b	b	a	b	b	a	b	a	a	a	b	a	b	a	a	a	b	a	b
AEGAMpCC_212	b	a	b	b	b	a	a	b	a	a	b	a	b	b	a	b	b	a	a	a	a	a	a	a	b	b	a	a	a	a	a	a	b	a	b	a	a	a	b	a	b	a	a	a	b	b	b	a	b
AEGAMpCC_253	b	b	a	a	a	b	b	b	b	a	b	a	a	a	a	a	b	a	a	b	a	a	a	b	b	b	b	b	a	b	a	b	a	b	a	b	a	b	a	b	b	b	a	b	b	b	a	a	a
AEGAMpCC_266	a	a	b	b	a	a	a	b	a	b	b	a	a	a	a	a	b	b	a	a	a	b	b	b	a	a	b	a	a	a	b	a	b	a	a	b	b	b	a	b	b	a	a	b	a	b	a	b	a
AEGAMpCC_292	a	b	a	a	b	b	a	b	a	b	a	a	b	b	a	a	a	b	a	b	a	a	a	a	b	a	b	a	b	a	b	a	a	a	a	b	b	b	b	a	a	b	a	b	b	a	b	b	a
AEGAMpCC_302*	a	a	a	b	a	b	b	a	b	b	b	a	a	b	b	b	b	b	a	a	b	b	b	b	a	b	b	a	a	b	a	-	a	b	b	a	b	a	b	b	a	b	a	b	a	b	b	b	b
AEGAMpCC_313	-	b	b	a	b	a	a	a	b	a	b	a	b	a	b	a	b	a	a	a	a	b	a	b	b	a	b	a	b	a	b	a	b	b	a	b	b	a	b	b	b	a	a	a	b	a	a	b	a
AEGAMpCC_370	b	b	b	b	b	a	b	a	b	b	a	a	a	b	a	b	b	b	b	a	a	b	a	b	a	a	a	b	b	b	b	a	a	b	b	b	b	b	a	a	b	b	a	a	b	a	a	a	b
AEGAMpCC_580	b	b	a	a	a	a	a	a	a	a	a	a	b	b	b	b	a	a	b	b	b	b	a	b	b	a	b	a	b	b	b	b	a	b	a	a	a	a	b	b	a	a	a	a	b	a	b	a	b
AEGAMpCC_64	a	b	b	b	b	b	a	b	a	a	a	b	a	b	b	b	b	b	a	b	b	a	a	b	a	b	b	a	a	b	a	a	a	b	b	a	a	a	b	b	a	a	b	b	b	b	b	b	b
AEGAMpCG_109	b	a	b	b	b	a	a	b	a	a	b	a	b	b	a	b	b	a	a	a	a	a	a	a	b	b	a	a	a	a	a	a	b	a	b	a	a	a	b	a	b	a	a	a	b	b	b	a	b
AEGAMpCG_174	a	a	b	b	a	b	b	a	a	b	b	a	a	b	b	b	b	b	a	a	b	b	b	b	a	b	a	a	a	a	a	a	a	b	b	a	b	a	b	b	a	b	a	a	a	b	b	b	b
AEGAMpCG_176	a	b	a	a	b	b	a	b	b	b	a	a	a	b	a	a	b	a	b	a	b	a	a	a	b	a	b	a	b	a	b	a	b	a	a	b	b	b	b	a	a	b	a	b	b	a	b	b	a
AEGAMpCG_262	a	a	a	a	a	b	b	a	b	b	b	b	a	a	a	b	a	a	b	a	a	b	a	b	b	b	b	a	a	b	b	b	b	b	a	a	b	b	a	a	b	b	a	b	a	a	a	b	b
AEGAMpCG_310******	a	a	b	a	a	a	a	b	a	a	a	a	b	b	a	b	b	a	a	a	a	a	a	a	a	b	a	a	a	a	a	a	b	a	a	a	a	a	a	a	b	a	a	a	a	b	b	a	a
AEGAMpCG_326	a	a	a	a	b	b	a	b	a	b	a	a	a	a	a	b	a	b	a	a	a	b	b	a	b	b	a	b	b	b	a	a	b	b	a	a	a	a	a	b	a	a	b	b	a	b	a	b	b
AEGAMpCG_356	b	a	a	a	a	a	b	a	a	a	b	b	b	b	a	a	b	b	a	a	a	b	a	a	b	a	a	b	b	b	b	b	b	a	b	b	a	a	b	b	b	a	a	a	b	b	a	a	b
AEGAMpCG_85	a	a	a	b	a	a	b	a	a	a	b	b	a	b	b	b	a	b	a	a	b	b	a	b	a	b	a	b	a	a	a	a	a	b	b	b	b	a	a	b	a	a	a	b	a	b	b	b	b
AEGCMpCA_160	a	b	a	a	a	a	a	b	b	b	a	a	b	b	b	a	b	b	a	a	a	a	b	a	b	b	a	a	b	a	b	a	b	a	a	a	a	a	b	b	a	a	a	a	a	a	b	a	b
AEGCMpCA_174	a	a	b	a	a	a	a	b	a	a	a	a	a	a	a	a	b	b	b	b	b	b	a	b	b	a	a	b	a	b	b	a	b	b	a	b	b	b	b	b	a	b	a	a	b	b	a	a	b
AEGCMpCA_193	a	b	a	b	b	a	a	a	b	a	a	a	b	b	b	b	a	a	b	b	b	a	a	b	b	a	b	a	b	b	b	b	a	b	a	b	a	a	b	b	a	a	a	a	b	b	b	b	a
AEGCMpCA_198	a	a	b	b	a	a	a	b	a	b	b	b	a	a	a	a	b	b	a	a	a	b	b	b	a	a	b	a	a	a	b	b	b	a	b	b	b	b	a	b	a	a	a	b	a	b	a	b	a
AEGCMpCA_226	a	a	a	a	a	b	b	b	a	a	a	a	b	b	b	b	b	b	b	b	b	a	a	b	b	a	b	a	b	b	b	b	b	b	a	a	a	b	a	b	b	a	a	a	a	a	b	b	a
AEGCMpCA_269	b	a	a	a	a	b	a	b	b	a	b	a	b	b	b	a	b	a	a	a	a	a	a	a	a	b	a	b	b	b	a	a	b	b	a	b	b	a	a	b	a	b	a	b	a	b	b	b	a
AEGCMpCA_320	a	a	a	b	a	b	b	a	a	b	b	a	a	b	b	b	b	b	a	a	b	b	b	b	a	b	a	b	a	a	a	a	a	b	b	a	b	a	b	b	a	b	a	a	a	b	b	b	b
AEGCMpCA_421	a	a	-	-	b	b	b	b	a	a	b	a	a	b	b	b	a	b	b	a	a	a	b	b	a	a	a	b	b	a	a	b	a	b	b	a	b	a	a	a	a	b	b	b	a	b	b	b	a
AEGCMpCA_70	a	b	a	b	b	a	a	a	b	a	a	a	b	b	b	b	a	a	b	b	b	b	a	b	b	a	b	a	b	b	b	b	a	b	a	b	a	a	b	b	a	a	a	a	b	b	b	b	a
AEGCMpCA_99	a	b	b	b	a	b	a	a	a	b	a	b	a	b	b	a	b	a	b	a	a	b	a	b	a	a	a	b	a	a	b	a	a	b	b	b	b	b	b	b	a	a	b	b	a	b	a	b	b
AEGGMpAT_195	b	a	b	a	a	b	a	b	b	a	b	a	b	b	b	b	b	a	a	a	b	a	a	b	a	b	a	b	b	b	a	a	b	b	b	a	b	a	b	b	b	b	a	a	a	b	b	b	a
AEGGMpAT_221	a	a	a	a	b	b	a	b	a	b	a	a	a	a	a	-	a	b	a	a	a	b	b	a	b	b	a	b	b	b	a	a	b	b	a	a	a	a	a	b	a	a	b	b	a	b	a	b	b
AEGGMpAT_256	a	a	b	b	a	a	a	b	a	b	b	b	a	a	a	a	b	b	a	a	a	b	b	b	a	a	b	a	b	a	b	b	b	a	b	b	b	b	a	b	b	a	a	b	a	b	a	b	a
AEGGMpAT_278	a	a	a	a	b	b	b	b	a	b	a	a	a	a	b	b	a	b	b	a	a	a	b	b	a	a	a	b	b	a	a	b	a	b	b	a	b	a	a	a	b	b	b	b	a	b	b	b	a
AEGGMpAT_356	a	b	a	a	a	a	a	b	b	b	a	a	b	b	b	a	b	b	a	a	a	a	b	a	b	b	a	a	b	a	b	a	b	a	a	a	a	a	b	b	a	a	a	a	a	a	b	a	b
AEGGMpAT_394	a	a	b	-	a	a	a	b	a	b	b	a	a	a	a	a	b	b	a	a	a	b	b	b	a	a	b	a	a	a	b	a	b	a	a	b	b	b	a	b	b	a	a	b	a	b	a	b	a
AEGGMpAT_426	a	b	a	a	b	b	a	b	a	b	a	a	b	b	a	a	a	b	a	a	b	a	a	a	b	a	b	a	b	a	b	a	a	a	a	b	b	b	b	a	a	b	a	b	b	a	b	b	a
AEGGMpAT_444	a	a	a	b	a	a	b	a	a	a	b	a	a	a	a	b	a	b	b	b	b	b	a	b	b	a	b	a	b	a	b	b	a	b	a	b	b	b	b	b	a	b	a	a	a	a	a	a	b
AEGGMpAT_596	b	b	a	a	a	b	b	b	b	a	b	a	a	a	a	a	b	a	a	b	a	a	a	b	b	b	a	b	a	b	a	b	a	b	a	b	a	a	a	b	b	b	a	b	a	a	a	a	a
AEGGMpAT_74	a	a	b	b	a	b	b	b	b	a	b	a	a	a	b	b	b	b	b	b	b	b	a	b	b	b	a	b	b	b	b	a	a	b	a	b	b	b	b	b	a	b	a	a	a	b	a	a	b
AEGGMpCG_130	b	b	b	a	a	b	a	a	a	b	a	a	b	a	a	b	a	a	b	a	a	a	b	b	b	b	b	a	b	a	a	a	b	b	a	a	b	b	b	b	a	a	a	b	a	b	b	b	a
AEGGMpCG_139	a	b	a	a	b	b	b	a	a	a	b	a	a	a	a	b	a	b	a	b	b	b	a	a	a	a	b	a	b	a	b	a	b	a	b	a	a	a	b	b	a	a	b	a	a	b	b	b	a
AEGGMpCG_170	a	b	a	a	b	b	a	b	b	b	a	a	a	b	a	a	b	b	a	a	b	a	a	a	b	a	b	a	b	a	b	a	a	a	a	b	b	b	b	a	a	b	a	b	b	a	b	b	a
AEGGMpCG_173	b	a	a	a	a	b	b	b	a	a	b	b	a	a	a	b	a	b	a	a	a	b	a	b	b	b	b	a	a	b	b	a	b	b	a	a	b	b	a	b	b	a	a	b	a	a	a	a	b
AEGGMpCG_188	a	a	a	a	b	b	b	b	a	b	b	a	a	b	b	b	a	b	b	a	a	a	b	b	a	a	a	b	b	a	a	b	a	b	b	a	b	a	a	a	a	b	b	b	a	b	b	b	a
AEGGMpCG_192	a	b	b	b	b	b	a	b	a	a	a	b	a	b	b	b	b	b	a	b	b	a	a	b	a	b	b	a	a	b	a	a	a	b	b	a	a	a	b	b	a	a	b	b	b	b	b	b	b
AEGGMpCG_209	a	a	b	b	a	a	a	b	a	b	b	a	a	b	a	b	b	b	a	a	a	a	b	b	a	b	b	a	a	a	b	a	b	a	a	b	a	b	a	a	a	a	-	a	a	b	a	-	a
AEGGMpCG_235*	a	b	b	a	a	a	a	a	b	b	a	a	b	a	b	a	b	b	a	a	a	a	b	a	b	b	b	a	b	a	b	a	a	a	a	a	a	a	b	b	a	a	a	a	a	a	b	a	b
AEGGMpCG_271	-	b	a	b	a	a	b	a	a	a	b	b	a	b	a	b	a	b	a	b	b	b	a	a	a	b	a	a	a	a	a	a	a	a	a	b	a	a	a	b	b	a	a	b	a	a	b	b	a
AEGGMpCG_322	a	b	a	b	b	a	b	a	b	b	a	b	a	b	a	b	b	a	b	a	a	b	a	a	b	a	b	a	b	b	b	b	b	b	b	b	b	b	a	a	b	b	a	a	b	a	a	b	b
AEGGMpCG_456	a	a	a	a	a	a	b	b	a	a	b	b	b	b	b	a	b	b	a	a	a	b	a	a	b	a	a	b	b	b	b	a	b	a	b	b	a	a	b	b	b	a	a	a	b	b	a	a	b
AEGGMpCG_599	a	b	a	a	b	-	a	a	a	a	b	a	a	b	a	b	b	b	a	b	b	b	a	b	a	a	b	a	b	b	b	b	b	a	b	b	a	a	b	a	b	b	-	a	a	b	b	a	b
AEGGMpCG_96	b	a	b	a	a	a	a	b	a	b	a	b	b	b	b	a	b	b	a	a	b	b	a	b	a	a	a	b	b	b	b	a	a	a	b	a	b	a	b	a	b	b	a	a	a	a	b	a	b
AEGTMpAT_188	a	b	b	b	b	a	a	a	b	b	a	a	b	a	b	b	b	a	b	b	b	a	a	b	b	a	b	a	b	a	b	b	a	b	a	b	b	a	b	a	b	a	b	a	a	b	a	b	a
AEGTMpAT_229	b	a	b	a	b	a	b	b	a	a	b	a	b	b	b	b	b	b	a	a	b	b	a	b	a	a	b	a	a	a	a	b	a	a	a	b	b	a	a	b	a	b	a	b	a	b	b	b	a
AEGTMpAT_293	b	a	b	a	b	a	a	b	a	b	a	a	b	b	b	a	b	a	b	a	b	a	b	b	b	b	b	a	b	a	b	b	a	a	a	b	b	b	b	a	a	a	b	b	a	a	b	a	b
AEGTMpAT_330	a	b	a	a	b	b	a	a	b	a	b	a	a	b	b	b	b	b	a	b	b	b	a	b	a	a	b	a	b	b	a	b	b	a	b	b	a	a	b	a	b	b	b	a	a	b	b	a	b
AEGTMpAT_345	a	b	b	b	a	a	b	b	b	a	a	a	a	b	b	a	b	b	a	b	a	b	a	a	b	a	a	b	a	a	b	b	a	a	b	b	a	a	b	b	a	b	a	b	b	a	a	b	a
AEGTMpAT_366	b	a	b	a	a	a	a	b	a	b	a	b	b	b	b	a	b	b	a	a	b	b	a	b	a	a	a	b	b	b	b	a	a	a	b	a	a	a	b	a	b	b	a	a	a	a	b	a	b
AEGTMpAT_372	a	a	a	a	b	b	b	b	a	b	a	a	a	a	b	b	a	b	b	a	a	a	b	b	a	a	a	b	b	a	a	b	a	b	b	a	b	a	a	a	b	b	b	b	a	b	b	b	a
AEGTMpAT_400	b	b	a	a	a	b	b	b	b	a	b	a	a	a	a	a	b	a	a	b	a	a	a	b	b	b	a	b	a	b	a	-	a	b	a	b	a	a	a	b	b	b	a	b	a	a	a	a	a
AEGTMpAT_418	a	a	a	a	a	a	a	a	b	b	b	a	b	a	b	b	b	b	a	b	b	b	a	a	a	a	b	b	b	b	b	b	b	b	a	b	b	b	b	a	b	a	b	a	a	a	a	b	a
AEGTMpAT_440	a	b	b	a	a	b	b	b	a	b	b	a	b	b	a	b	b	a	b	a	a	a	a	b	-	a	a	a	a	a	b	b	a	b	b	a	b	a	b	b	b	a	a	a	a	a	b	a	b
AEGTMpAT_481	a	a	b	b	a	b	b	a	a	b	b	a	a	b	b	b	b	b	a	a	b	b	b	b	a	b	a	a	a	a	a	a	b	b	b	a	b	a	b	a	b	b	a	a	a	b	a	b	b
AEGTMpAT_548*	b	b	b	b	b	a	b	a	b	b	a	a	a	b	a	b	b	b	b	a	b	a	b	b	a	a	a	b	b	b	b	a	b	b	b	b	b	b	a	a	b	b	a	a	b	a	a	a	b
AEGTMpAT_557	b	b	b	b	b	a	b	a	b	b	a	a	a	a	b	b	a	b	b	a	b	a	b	b	a	a	a	b	b	b	b	a	b	b	b	b	a	b	a	a	b	b	a	b	b	a	a	a	b
AEGTMpAT_622	a	b	b	b	b	a	a	a	b	b	a	a	b	a	b	b	b	a	b	b	b	a	a	b	-	a	b	a	b	a	b	b	a	b	a	b	b	a	b	a	b	a	b	a	a	b	a	b	a
AEGTMpAT_655	b	b	a	a	a	a	a	b	a	b	b	b	b	a	b	a	a	b	a	b	a	a	a	b	-	b	a	b	b	a	a	a	a	b	b	b	b	a	b	b	b	a	a	a	a	a	b	a	b
AEGTMpAT_676**	a	a	b	b	b	b	a	b	a	a	a	b	a	b	b	b	b	b	b	b	b	a	a	b	a	b	b	a	a	b	b	a	a	b	b	a	a	a	b	b	a	a	b	b	b	b	b	b	b
AEGTMpAT_730	b	b	b	a	b	a	a	b	a	b	a	b	b	b	b	a	b	b	b	a	b	a	b	b	b	b	b	a	b	a	b	b	a	a	a	b	b	a	b	a	a	b	a	b	a	a	a	a	b
AEGTMpAT_81	b	b	b	b	b	b	a	b	a	b	a	a	b	a	b	b	a	b	a	a	b	a	a	b	b	b	a	a	b	b	a	b	a	b	a	a	a	b	b	b	a	a	a	b	b	b	b	b	b
AEGTMpAT_814	b	a	a	a	b	a	b	a	b	a	a	b	a	a	a	b	a	b	b	b	b	b	a	a	b	a	b	a	a	a	b	a	a	b	b	a	a	b	a	b	a	a	b	a	a	b	b	a	a
AEGTMpAT_91	a	b	a	b	b	a	a	a	b	b	a	a	b	b	b	b	a	a	b	b	b	a	a	b	b	a	b	a	b	b	b	b	a	b	a	b	a	a	b	b	a	a	a	a	b	b	b	b	a
ag-0011*	b	b	b	b	b	a	b	a	b	b	b	a	a	a	b	b	a	b	b	a	b	a	b	b	a	a	a	b	b	b	b	a	b	b	b	b	a	a	a	b	b	-	a	b	b	a	a	a	b
AHMR_01A16**	a	b	b	a	a	a	a	a	b	b	a	a	b	a	b	a	b	b	a	a	a	a	b	a	b	b	b	a	b	a	b	a	a	a	a	a	a	a	b	b	a	a	a	a	a	a	b	a	b
AHMR_01D24	a	a	a	a	a	b	a	b	b	a	b	a	a	b	b	a	a	-	a	a	a	a	a	b	a	a	a	b	b	b	a	b	a	b	-	a	b	a	b	a	b	b	b	b	b	b	a	b	a
AHMR_01E04	a	b	b	b	b	a	a	a	b	a	a	a	b	a	b	b	b	a	b	b	b	a	a	b	b	a	b	a	b	a	b	b	a	b	a	b	a	a	b	a	b	a	b	a	a	b	b	b	a
AHMR_01G04	a	a	b	a	a	a	a	b	a	b	-	b	b	b	b	b	b	a	a	a	a	a	a	a	a	b	a	a	a	a	a	b	b	a	a	b	a	b	a	a	b	a	a	b	a	b	b	a	a
AHMR_01H14	b	a	a	b	a	a	b	a	a	a	b	a	b	b	a	b	a	a	b	a	b	b	a	b	b	a	b	a	a	a	b	b	a	b	a	a	a	a	a	b	a	a	b	a	a	a	b	a	a
AHMR_01H24	b	a	b	a	b	b	b	a	b	b	a	b	b	b	b	b	a	b	a	b	b	a	a	a	a	a	a	a	a	a	b	a	b	a	a	b	b	a	b	a	a	a	b	a	a	b	a	a	b
AHMR_01I02	-	b	a	a	a	b	b	b	b	a	b	a	a	-	a	a	b	a	-	b	a	a	a	b	b	b	b	b	a	b	a	b	a	b	-	b	a	b	a	b	b	b	a	b	b	b	a	a	a
AHMR_01I04	a	a	a	b	a	a	b	b	a	b	a	a	b	b	a	a	b	a	b	b	b	a	b	b	b	b	b	a	a	b	a	a	b	b	b	b	a	a	b	b	a	a	a	a	b	b	a	a	b
AHMR_01I18	a	a	a	b	b	a	b	b	b	a	b	a	b	a	a	b	a	b	a	b	a	b	a	b	b	b	a	b	b	b	a	b	a	a	a	b	b	a	b	b	b	b	a	a	b	a	b	b	a
AHMR_01J05	b	a	a	a	a	b	b	b	a	a	b	b	a	a	a	b	a	b	a	a	a	b	a	b	b	b	b	a	a	b	b	b	b	b	a	a	b	b	a	b	b	a	a	b	a	a	a	a	b
AHMR_01J15	a	b	b	b	b	a	b	a	a	a	b	b	b	a	b	a	b	b	a	a	a	b	a	b	a	a	b	a	a	a	b	a	a	b	b	b	b	a	b	b	b	a	a	b	a	a	a	b	a
AHMR_01K16	a	a	b	b	a	b	b	a	a	b	b	-	a	b	b	b	b	b	a	a	b	b	b	b	a	b	a	a	a	a	a	a	a	b	b	a	b	a	b	b	b	b	a	a	a	b	b	b	b
AHMR_01K20	a	b	a	a	b	b	a	b	a	b	a	a	b	b	a	a	a	b	a	a	b	a	a	a	b	a	b	a	b	a	b	a	a	a	a	b	b	b	b	a	a	b	a	b	b	a	b	b	a
AHMR_01M23	a	b	a	b	a	a	b	a	a	a	b	a	a	a	a	a	a	b	b	b	b	b	a	b	b	-	a	b	b	a	b	a	a	b	a	b	b	b	b	b	a	b	a	a	a	b	a	a	b
AHMR_01N05	b	a	b	a	a	a	a	b	a	b	a	b	b	b	b	a	b	b	a	a	b	b	a	b	a	a	a	b	b	b	b	a	a	a	a	b	b	a	b	a	b	b	b	a	a	a	b	a	a
AHMR_01O08	a	b	b	a	b	b	a	b	a	b	-	a	b	b	a	a	a	b	a	b	a	a	a	a	b	a	b	a	b	a	b	a	a	-	a	b	b	b	b	a	a	b	a	b	b	a	b	b	a
AHMR_01O19	a	a	b	b	a	b	b	a	a	b	b	a	a	b	b	b	b	b	a	a	b	b	b	b	a	b	a	a	a	a	a	a	a	b	b	a	b	a	b	b	b	b	a	a	a	b	b	b	b
AHMR_02A15	a	b	b	b	b	a	a	a	b	a	a	a	b	a	b	b	a	a	b	b	b	a	a	b	b	a	b	a	b	b	b	b	a	b	-	b	a	a	b	a	b	a	b	a	a	b	b	b	a
AHMR_02E05	a	b	a	b	b	a	a	a	b	b	a	a	b	b	b	b	a	a	b	b	b	a	a	b	-	a	b	a	b	b	b	b	a	b	a	b	a	a	b	-	-	a	a	a	b	b	b	b	a
AHMR_02E17	a	a	a	a	a	a	b	b	a	a	b	b	b	-	b	a	b	b	a	a	a	b	a	a	b	a	a	b	b	b	b	b	b	-	-	b	a	a	b	b	b	a	a	a	a	b	a	a	b
AHMR_02E23	a	a	a	a	a	b	b	b	a	a	a	a	b	b	b	b	b	b	a	b	b	a	a	b	b	a	b	a	b	b	b	b	b	b	a	a	a	b	a	b	b	a	a	a	a	a	b	b	a
AHMR_02F13	a	a	a	b	a	b	b	a	a	b	b	a	a	b	b	b	b	b	a	a	b	b	b	b	a	b	b	a	a	b	a	a	a	b	b	a	b	a	b	b	a	b	a	b	a	b	b	b	b
AHMR_02F14	b	a	a	a	a	b	a	b	b	a	b	a	a	b	b	a	b	a	a	a	a	a	a	a	a	b	b	b	b	b	a	a	a	b	a	b	b	a	a	b	b	b	a	b	b	b	b	a	a
AHMR_02F22	b	a	b	b	b	-	a	b	a	a	b	a	b	-	a	b	b	a	a	a	a	a	a	a	b	b	a	a	a	a	a	a	b	a	b	a	a	-	b	a	b	a	a	a	b	b	b	a	b
AHMR_02G16	b	a	b	a	b	a	a	-	a	b	a	a	b	b	b	a	b	b	b	a	b	a	b	b	b	b	-	a	b	a	b	b	a	a	a	b	b	b	b	a	a	a	b	b	a	a	b	a	b
AHMR_02I24	b	a	b	a	b	b	a	a	b	a	a	a	a	b	a	a	b	b	a	b	a	a	a	b	b	a	b	a	b	b	b	b	b	b	b	a	b	b	a	b	b	b	a	b	b	b	b	a	b
AHMR_02J07	a	a	b	b	a	b	b	a	a	b	b	a	a	-	b	b	b	b	a	a	b	b	b	b	a	b	a	a	a	a	-	a	a	b	b	a	b	a	b	b	b	b	a	a	a	b	b	b	b
AHMR_02K06	a	b	b	b	b	a	b	a	a	a	b	b	b	a	b	a	b	b	a	a	a	b	a	b	a	a	b	a	a	a	b	a	a	b	b	b	b	a	b	b	b	a	a	b	a	a	a	b	a
AHMR_02K09	a	a	b	b	a	a	a	b	a	b	b	a	a	b	a	b	b	b	-	a	a	a	b	b	a	a	b	a	a	a	b	a	b	a	a	b	a	b	a	a	a	a	b	a	a	b	a	b	a
AHMR_02O01	b	a	b	a	b	a	a	b	a	-	a	b	b	b	b	a	b	b	b	a	b	a	b	b	b	b	-	a	b	a	b	b	a	a	a	b	b	b	b	a	a	a	b	b	a	a	b	a	b
AHMR_02O05	b	b	b	b	b	b	a	b	a	b	a	a	b	a	b	b	a	b	a	a	b	a	a	b	b	b	a	a	b	b	a	b	a	b	a	a	a	b	b	b	a	a	a	b	b	b	b	b	b
AHMR_02O19	a	a	a	a	a	b	b	b	a	a	a	a	b	b	b	b	b	a	b	b	b	a	a	b	b	a	b	a	-	b	b	b	-	b	a	a	a	b	a	b	-	a	a	a	a	a	b	b	a
AHMR_02P13	a	a	b	a	a	a	a	b	a	b	b	a	a	a	a	b	a	a	a	b	b	a	b	a	b	b	a	b	a	a	b	b	a	b	a	b	a	b	b	b	b	-	a	a	b	b	b	b	a
AHMR_02P24*	b	a	a	a	b	a	a	a	b	a	a	b	a	a	a	b	a	a	b	b	b	b	a	a	b	b	a	a	a	a	b	a	b	b	a	a	a	b	a	-	a	a	b	a	a	b	b	b	a
AHMR_03D07	a	a	a	a	a	b	a	a	b	a	b	b	b	b	b	b	a	a	b	a	a	b	a	a	b	b	a	b	a	a	b	b	a	a	a	a	b	b	a	a	a	b	b	a	b	a	a	b	a
AHMR_03E01	a	a	a	a	b	b	b	b	a	b	a	a	a	b	b	b	a	b	b	a	a	a	b	b	a	a	a	b	b	a	a	b	a	b	b	a	b	a	a	a	a	b	b	b	a	b	b	b	a
AHMR_03E04	a	b	a	b	b	a	a	a	b	b	a	a	b	b	b	b	a	a	b	b	b	a	a	b	b	a	b	a	b	b	b	b	a	b	-	b	a	a	b	b	b	a	a	a	b	b	b	b	a
AHMR_03E24	a	a	b	a	a	a	a	b	a	b	a	b	b	b	b	b	b	a	a	a	a	a	-	a	a	b	a	a	a	a	a	b	b	a	a	b	a	b	a	a	b	a	a	b	a	b	b	a	a
AHMR_03G06	a	b	a	a	b	b	a	b	b	b	a	-	a	b	a	a	b	b	a	a	b	a	a	a	b	a	b	a	b	a	b	a	b	a	a	b	b	b	b	a	a	b	a	b	b	a	b	b	a
AHMR_03K19	a	a	a	a	a	a	b	b	a	a	b	b	b	b	b	a	b	b	a	a	a	b	a	a	b	a	a	b	b	b	b	b	b	a	a	b	a	a	b	b	b	a	a	a	a	b	a	a	b
AHMR_03L15	a	b	b	b	b	a	a	a	b	b	a	a	b	b	b	b	a	a	b	b	b	a	a	b	b	a	b	a	b	b	b	b	a	b	a	b	a	a	b	b	b	a	a	a	b	b	b	b	a
AHMR_03L19	a	b	b	a	b	a	a	a	b	b	a	a	b	a	b	b	b	a	b	b	b	a	a	b	b	a	b	a	b	a	b	b	a	b	a	b	b	a	b	a	b	a	b	a	a	b	a	b	a
AHMR_03M15	a	b	a	a	a	a	b	b	b	b	b	a	a	a	a	-	a	b	b	a	a	b	b	b	b	a	b	a	a	a	b	b	b	a	b	a	b	-	a	a	b	a	b	a	a	a	b	a	b
AHMR_03M16	a	b	a	a	b	b	a	b	a	b	a	a	b	b	a	a	a	b	a	a	b	a	a	a	b	a	b	a	b	a	b	-	a	-	-	b	b	b	b	a	a	b	a	b	b	a	b	b	a
AHMR_03O11	b	a	b	a	a	a	a	b	a	b	a	b	b	b	b	a	b	b	a	a	b	b	a	b	a	a	a	b	b	b	b	a	a	a	b	a	b	a	b	a	b	b	a	a	a	a	b	a	b
AHMR_03O14	b	a	a	b	b	a	a	a	a	b	b	b	a	b	b	b	a	b	a	a	b	b	a	a	a	b	a	b	a	a	a	b	a	b	-	b	b	a	-	b	a	a	a	b	a	b	b	a	b
AHMR_04A05	b	a	a	a	a	b	a	b	b	a	b	a	b	b	b	a	b	a	a	a	a	a	a	a	a	b	a	b	b	b	a	a	b	b	a	b	b	-	a	b	a	b	a	b	a	b	b	b	a
AHMR_04A16	-	b	a	a	a	a	a	a	a	a	b	b	b	a	a	a	a	b	a	b	a	a	a	a	b	b	a	b	b	a	b	b	-	b	b	b	b	-	b	b	b	a	a	a	a	a	b	a	b
AHMR_04B08	a	a	b	a	a	a	-	b	a	b	a	b	b	b	b	b	b	a	a	a	a	a	a	a	a	b	a	a	a	a	a	b	b	a	a	b	a	b	a	a	b	a	a	b	a	b	b	a	a
AHMR_04B14	a	b	b	b	b	a	a	a	b	a	a	a	b	a	b	b	b	a	b	b	b	a	a	b	b	a	b	a	b	a	b	b	a	b	a	-	a	a	b	a	-	a	b	a	a	b	b	b	a
AHMR_04C19	a	a	a	a	b	b	b	b	a	b	a	a	a	a	a	b	a	b	a	a	a	a	b	b	b	a	a	b	b	a	a	a	b	b	b	a	a	a	a	a	b	b	b	b	a	b	b	b	a
AHMR_04D09	a	b	b	b	a	a	b	b	b	a	a	a	a	b	a	a	b	b	a	b	a	b	a	a	b	a	a	b	a	a	b	b	a	a	b	b	a	a	b	b	a	b	a	b	b	a	a	b	a
AHMR_04E11	a	a	a	a	b	b	b	b	a	b	a	a	a	b	b	b	a	b	b	a	a	a	b	b	a	a	a	b	b	a	a	b	a	b	b	a	b	a	a	a	a	b	b	b	a	b	b	b	a
AHMR_04E24	a	a	a	a	a	a	b	b	a	a	b	b	b	b	b	a	b	b	a	a	a	b	a	a	b	a	a	b	b	b	b	b	b	a	a	b	a	a	b	b	b	a	a	a	a	b	a	a	b
AHMR_04F11	a	a	a	a	b	b	b	b	a	b	a	a	a	b	b	b	a	b	b	a	a	a	b	b	a	a	a	b	b	a	a	b	a	b	b	a	b	a	a	a	a	b	b	b	a	b	b	b	a
AHMR_04F20	a	b	b	a	a	b	b	b	a	b	a	a	b	a	a	b	b	a	b	a	a	-	a	-	b	a	a	a	a	a	b	b	a	b	b	a	b	a	b	b	b	a	a	a	a	a	b	a	b
AHMR_04G03	a	a	a	b	a	a	a	b	a	a	b	b	a	b	b	a	b	b	a	b	b	a	b	b	a	a	a	b	a	b	b	b	b	b	a	b	a	b	a	b	a	a	a	a	b	b	a	a	b
AHMR_04I01	a	a	a	a	b	b	b	b	a	b	a	a	a	a	b	b	a	b	a	a	a	a	b	b	b	a	a	b	b	a	a	a	b	b	b	a	b	a	a	a	b	b	b	b	a	b	b	b	a
AHMR_04J02	b	a	-	b	b	a	a	a	a	b	b	b	a	b	b	b	a	b	a	a	b	b	a	a	a	b	a	b	a	a	a	b	a	b	b	b	b	a	a	b	a	a	a	b	a	b	b	a	b
AHMR_04J20	b	b	b	a	a	b	a	a	a	b	a	a	b	a	a	b	a	a	b	a	a	a	b	b	b	b	b	a	b	a	a	b	b	b	a	a	b	b	b	b	a	a	a	b	a	b	b	b	a
AHMR_04L03	b	a	b	a	b	a	a	b	a	b	a	b	b	b	b	a	b	b	b	a	b	a	b	b	b	b	b	a	b	a	b	b	a	a	a	b	b	b	b	a	a	a	b	b	a	a	b	a	b
AHMR_04L06	a	b	a	b	b	a	b	a	b	b	a	b	a	b	a	b	b	a	b	a	a	b	a	a	b	a	b	a	b	b	b	b	b	b	b	b	b	b	a	a	b	b	a	a	b	a	a	b	b
AHMR_04M08	a	a	a	a	a	a	b	b	a	a	b	b	b	-	b	a	b	b	a	a	a	b	a	a	b	a	a	b	b	b	b	b	-	a	a	b	a	-	b	b	b	a	a	a	a	b	a	a	b
AHMR_04P14	a	a	a	a	a	b	b	b	a	a	a	a	b	b	b	-	b	b	a	b	b	a	a	-	b	a	b	a	b	b	b	-	b	b	a	a	a	b	a	b	b	a	a	a	a	a	b	b	a
AHMR_05B09	a	a	a	a	b	b	b	b	a	-	a	a	a	a	b	b	a	b	a	a	a	a	b	-	b	a	a	b	b	a	a	a	b	b	-	a	b	a	a	a	b	b	b	b	a	b	b	b	a
AHMR_05C05	b	b	b	a	b	a	a	b	a	b	a	b	b	b	b	a	b	b	b	a	b	a	b	b	b	b	b	a	b	a	b	b	a	a	a	b	b	a	b	a	a	b	a	b	a	a	b	a	b
AHMR_05D18	b	b	b	b	a	a	a	-	b	a	b	-	b	a	b	a	b	b	a	a	b	b	a	b	b	a	a	b	b	a	b	a	a	a	a	b	-	a	b	a	b	b	b	a	b	a	a	a	a
AHMR_05D19	a	a	a	a	b	b	b	b	a	b	a	a	a	-	b	b	a	b	b	a	a	a	b	b	a	a	a	b	b	a	a	b	a	b	b	a	b	a	a	a	a	b	b	b	a	b	b	b	a
AHMR_05D22	b	a	b	a	b	b	a	a	b	a	a	a	a	b	a	a	b	b	a	b	a	a	a	b	b	a	b	a	b	b	b	b	b	b	b	-	b	b	a	b	b	b	a	b	b	b	b	a	b
AHMR_05H18	a	b	b	b	a	a	b	b	b	a	a	a	a	b	a	a	b	b	a	b	a	b	a	a	b	a	a	b	a	a	b	b	a	a	b	b	a	a	b	b	a	b	a	b	b	a	a	b	a
AHMR_05I19	b	a	b	a	a	a	a	b	a	b	a	b	b	b	b	a	b	b	a	a	b	b	a	b	a	a	a	b	b	b	b	a	a	a	a	b	b	a	b	a	b	b	b	a	a	a	b	a	a
AHMR_05I24	a	a	a	a	b	b	b	b	a	b	a	a	a	a	a	b	a	b	a	a	a	a	b	b	b	a	a	b	b	a	a	a	b	b	b	a	a	a	a	a	b	b	b	b	a	b	b	b	a
AHMR_05K15	a	b	a	a	a	a	b	b	b	b	b	a	a	a	a	b	a	b	b	a	a	b	b	b	b	a	b	a	a	a	b	b	b	a	b	a	b	-	a	a	b	a	b	a	a	a	b	a	b
AHMR_05L13	b	a	b	b	b	-	a	b	a	a	b	a	b	b	a	b	b	a	a	a	a	a	a	a	b	b	a	a	a	a	a	a	b	a	b	a	a	a	b	a	b	a	a	a	b	b	b	a	b
AHMR_05N13	b	a	a	b	a	a	a	a	b	b	a	a	a	b	b	-	a	a	b	b	a	b	a	b	a	b	b	a	b	b	a	b	-	-	a	a	-	b	b	b	a	a	a	b	b	b	-	a	b
AHMR_05N15	b	a	a	b	b	a	a	a	a	b	b	b	a	b	b	b	-	b	a	a	b	b	a	a	a	b	a	b	a	a	a	b	a	b	b	b	b	a	a	b	a	a	a	b	a	b	b	a	b
AHMR_05O20	a	a	a	b	a	a	b	b	a	b	a	a	b	b	a	a	b	a	b	b	b	a	b	-	b	b	b	a	a	b	a	a	b	b	b	b	a	a	b	b	a	a	a	a	b	b	a	a	b
AHMR_05O24	a	a	b	b	a	b	b	a	a	b	b	a	a	b	b	b	b	b	a	a	b	b	b	b	a	b	a	a	a	a	a	a	a	b	b	a	b	a	b	b	b	b	a	a	a	b	b	b	b
AHMR_05P03	a	a	a	a	a	b	b	a	a	a	a	a	b	b	b	b	b	a	b	b	b	a	a	b	b	a	b	a	b	b	b	b	b	b	a	a	a	b	a	b	b	a	a	a	a	a	b	b	a
AHMR_06A14	a	b	a	a	a	a	b	b	b	b	b	a	a	a	a	b	a	b	b	a	a	b	b	b	b	a	b	a	a	a	b	-	-	a	b	a	b	a	a	a	b	a	b	a	a	a	b	a	b
AHMR_06A16	a	b	b	a	a	b	b	b	a	b	a	a	b	a	a	b	b	a	b	a	a	a	a	b	b	a	a	a	a	a	b	b	a	b	b	a	b	a	b	b	b	a	a	a	a	a	b	a	b
AHMR_06C03	a	b	a	b	b	a	b	a	b	a	a	a	a	b	a	b	b	b	b	a	a	b	a	b	b	a	a	b	b	b	b	b	a	b	b	b	b	b	a	a	b	b	a	a	b	a	a	b	b
AHMR_06D23	b	b	b	b	b	b	a	b	a	b	a	a	b	a	b	b	a	b	a	a	b	a	a	b	b	b	a	a	b	b	a	b	a	b	a	a	a	b	b	b	a	a	a	b	b	b	b	b	b
AHMR_06E02	a	b	a	a	b	b	a	a	b	b	b	a	b	b	a	a	b	a	b	a	a	b	a	a	b	a	b	a	b	a	b	a	b	a	a	b	b	a	b	b	b	a	a	b	b	a	b	b	a
AHMR_06E08	a	b	a	b	a	a	b	a	b	a	b	a	a	a	b	a	a	b	b	b	b	b	a	b	b	b	a	b	b	b	b	a	a	b	a	b	b	b	b	b	a	b	a	a	a	b	a	a	b
AHMR_06F17	a	a	b	a	a	a	a	b	a	b	a	b	b	-	b	b	b	a	a	a	a	a	a	a	a	b	a	a	a	a	a	b	b	a	a	b	a	b	a	a	b	a	a	b	a	b	b	a	a
AHMR_06G22	a	b	b	a	a	b	a	b	a	b	b	a	b	b	a	a	a	a	a	b	a	a	b	a	b	b	b	a	a	a	b	a	a	b	a	b	a	b	b	a	b	b	a	b	b	b	b	b	a
AHMR_06H22	a	b	a	a	b	b	a	b	a	-	a	a	b	b	a	a	a	b	a	a	b	a	a	a	b	a	-	a	b	a	b	a	a	a	a	b	-	b	-	a	a	b	a	b	b	a	b	b	a
AHMR_06I03	a	b	a	b	b	-	a	a	b	a	a	a	b	b	b	b	a	a	b	b	b	a	a	b	b	a	b	a	b	b	b	b	a	b	-	b	a	a	b	b	a	a	a	a	b	b	b	b	a
AHMR_06K02	a	a	a	a	a	a	b	b	a	a	b	b	b	b	b	a	b	b	a	a	a	b	a	a	b	a	a	b	b	b	b	b	b	a	a	b	a	a	b	b	b	a	a	a	a	b	a	a	b
AHMR_06K10	a	b	a	b	b	a	-	a	b	a	a	a	a	b	a	b	b	b	b	a	a	b	a	b	b	a	a	b	b	b	b	b	b	b	b	b	b	b	a	a	b	b	a	a	b	a	a	b	b
AHMR_06N06	a	b	a	b	b	a	a	a	b	a	a	-	-	b	b	b	a	a	b	b	b	a	a	b	b	a	b	a	b	b	b	b	a	b	a	b	a	a	b	b	a	-	a	a	b	b	b	b	a
AHMR_06N21	a	b	b	a	a	b	a	b	a	b	b	a	b	b	a	a	a	a	a	b	a	a	b	a	b	b	b	a	a	a	b	a	a	b	a	b	a	b	b	a	b	b	a	b	b	b	b	b	a
AHMR_06O02**	a	a	b	b	b	b	a	b	-	a	a	b	a	b	b	b	a	b	b	b	b	a	-	b	a	b	b	a	a	b	b	a	b	b	b	a	a	a	b	b	b	a	b	b	b	b	b	b	b
AHMR_06O06	b	b	b	a	b	a	a	b	a	b	a	b	b	b	b	a	-	b	b	a	-	a	b	b	b	b	b	a	b	a	b	b	a	a	a	b	-	a	b	a	a	b	a	b	a	a	-	a	b
AHMR_06O18	b	a	b	a	b	b	a	a	b	a	a	a	a	b	a	a	b	b	a	b	a	a	a	b	b	a	b	a	b	b	b	b	b	b	b	a	b	b	a	b	b	b	a	b	b	b	b	a	b
AHMR_06P20	b	a	a	b	a	a	b	a	a	a	a	a	b	b	a	b	a	a	b	a	b	b	a	b	b	a	b	a	a	b	b	b	a	b	a	a	a	a	b	b	a	a	a	a	b	a	b	a	b
AHMR_07B04*	a	a	b	a	a	b	b	-	a	a	b	a	b	b	b	b	b	b	-	a	a	-	a	b	b	a	a	a	a	a	a	b	a	a	b	a	b	a	a	a	b	a	b	a	a	a	a	a	b
AHMR_07B11	a	b	b	a	a	b	b	b	a	a	b	a	b	b	b	b	b	b	a	a	a	b	a	b	b	a	a	a	a	a	a	b	a	a	b	a	b	a	a	a	b	a	b	a	a	a	a	a	b
AHMR_07C18	b	a	b	b	b	-	a	b	a	a	b	a	b	b	a	b	b	a	a	a	a	a	a	a	b	b	a	a	a	a	a	a	b	a	b	a	a	a	b	a	b	a	a	a	b	b	b	a	b
AHMR_07D10	a	b	b	a	b	a	a	a	b	a	b	b	b	a	b	a	b	b	a	a	a	b	a	b	b	a	b	a	a	a	b	a	b	b	b	b	b	a	b	b	b	a	a	b	b	a	a	b	a
AHMR_07F08*******	a	a	a	a	a	a	a	b	a	a	b	a	a	-	a	b	a	a	a	a	a	a	a	a	b	a	a	a	a	a	a	a	b	a	b	a	a	a	a	a	b	a	a	a	-	a	b	a	b
AHMR_07H11	a	a	b	a	a	a	a	a	b	b	b	a	b	a	b	b	b	a	-	-	b	b	a	b	b	a	b	a	b	b	b	b	b	b	a	b	b	b	b	a	b	a	b	a	a	b	a	b	a
AHMR_07J12	-	b	a	b	b	a	b	a	b	a	a	a	a	b	a	b	b	b	b	a	a	b	a	b	b	a	a	b	b	b	b	b	-	b	-	b	b	-	a	a	b	b	a	a	b	a	a	b	-
AHMR_07K15	a	a	a	b	a	a	b	b	a	b	a	a	b	b	a	a	b	a	b	b	b	a	b	b	b	b	b	a	a	b	a	a	b	b	b	b	a	a	b	b	a	a	a	a	b	b	a	a	b
AHMR_07L07*	b	b	a	a	a	a	b	a	a	a	a	a	a	b	a	b	a	b	a	b	b	b	a	a	a	b	a	a	a	a	a	a	a	a	a	b	a	-	a	a	b	a	b	a	a	a	a	b	a
AHMR_07L14	a	a	a	a	b	b	b	b	a	a	a	a	b	b	b	b	b	b	a	b	b	b	a	b	a	a	b	a	b	b	b	b	b	a	a	a	b	a	a	b	a	b	a	b	a	b	b	b	a
AHMR_07L20	a	a	a	a	b	b	b	b	a	b	a	a	a	a	a	b	a	b	a	a	a	a	b	b	b	b	a	b	b	a	a	a	b	b	a	a	a	a	a	a	a	b	b	b	a	b	b	b	a
AHMR_07M10	a	a	a	a	a	b	a	b	b	a	b	a	a	a	a	b	a	a	b	a	a	a	b	b	b	a	b	a	a	b	a	b	a	b	a	b	b	a	a	b	a	b	a	b	a	b	b	b	a
AHMR_07N17	b	b	b	b	b	b	a	b	a	b	a	a	b	a	b	b	a	b	a	a	b	a	a	b	b	b	a	a	b	b	a	b	a	b	a	a	a	b	b	b	a	a	a	b	b	b	b	b	b
AHMR_07O03	a	a	a	a	a	a	b	b	a	a	b	b	b	b	b	a	b	b	a	a	a	b	a	a	b	a	a	b	b	b	b	b	-	a	b	b	a	a	b	b	b	a	a	a	b	b	a	a	b
AHMR_07O17*	a	a	b	a	a	b	-	b	a	a	b	a	b	b	b	b	b	b	a	a	a	b	a	b	b	a	a	a	-	a	a	b	a	a	b	a	b	a	a	a	b	a	b	a	a	a	a	a	b
AHMR_07O20	b	a	a	b	b	a	a	a	a	b	b	b	a	b	b	b	a	b	a	a	b	b	a	a	a	b	a	b	a	a	a	b	a	b	b	b	b	a	a	b	a	a	a	b	a	b	b	a	b
AHMR_08A06	b	a	a	b	a	a	a	a	b	b	a	a	a	b	b	b	a	a	b	b	a	b	a	b	a	a	b	a	b	b	a	b	a	a	a	a	b	b	b	b	a	a	a	b	b	b	a	a	b
AHMR_08B18	a	b	a	-	b	a	b	a	b	a	a	a	a	b	a	b	b	b	b	a	a	b	a	b	b	a	a	b	b	b	b	b	b	b	b	b	b	b	a	a	b	b	a	a	b	a	a	b	b
AHMR_08C24	a	b	-	b	b	a	b	a	b	a	a	-	a	b	a	b	b	b	b	a	a	b	a	b	b	a	a	b	-	b	b	b	a	b	b	b	b	b	a	a	b	b	a	a	b	a	a	b	b
AHMR_08D22	a	a	b	a	a	a	a	b	b	b	a	a	b	b	b	a	b	b	a	b	b	a	b	a	b	b	a	a	b	a	b	a	b	a	a	a	a	a	b	b	a	a	a	a	a	b	b	a	b
AHMR_08D24	a	a	b	a	a	a	a	b	b	a	b	a	a	a	b	-	-	-	a	a	a	b	b	a	b	b	b	a	a	b	b	a	a	b	a	a	a	a	a	b	a	a	b	b	b	b	a	b	b
AHMR_08E01	a	b	b	b	b	a	a	a	b	a	a	a	b	a	b	b	a	a	b	b	b	a	a	b	b	a	b	a	b	a	b	b	a	b	a	b	a	a	b	a	b	a	b	a	a	b	b	b	a
AHMR_08E16	a	b	b	b	a	b	a	a	a	b	b	b	a	a	b	a	b	a	b	a	a	b	a	b	a	a	a	b	a	a	b	a	a	a	b	b	b	b	b	b	a	a	a	b	a	b	a	b	-
AHMR_08E23	a	b	a	a	b	b	a	a	b	a	b	a	a	b	b	b	-	-	a	b	b	b	a	b	a	a	-	a	-	b	a	b	-	a	b	b	a	a	b	a	b	b	b	a	a	b	b	a	b
AHMR_08G05	a	b	a	b	b	a	b	a	b	b	a	-	a	b	a	b	b	a	b	a	a	b	a	a	b	a	b	a	b	b	b	b	b	b	b	b	b	b	a	a	b	b	a	a	b	a	a	b	b
AHMR_08H17	a	b	a	a	a	a	a	b	b	b	a	a	b	b	b	-	b	b	a	a	a	a	b	a	b	b	a	a	b	a	b	a	b	a	a	a	a	a	b	b	a	a	a	a	a	a	b	a	b
AHMR_08J09	a	b	b	a	b	a	a	a	b	a	b	b	b	a	b	a	-	a	a	a	a	b	a	b	b	a	b	a	a	a	b	a	b	b	b	b	-	a	b	b	b	a	a	b	b	a	a	b	a
AHMR_08K21	a	b	b	b	a	a	b	b	b	-	-	a	a	b	-	a	b	b	a	b	a	b	a	a	b	a	a	b	a	a	b	b	a	a	b	b	a	a	b	b	a	b	a	b	b	a	a	b	a
AHMR_08N09	a	b	a	a	b	b	a	b	a	-	a	a	b	b	a	a	a	b	a	a	b	a	a	a	b	a	b	a	b	a	b	a	a	a	a	b	b	b	b	a	a	b	a	b	b	a	b	b	a
AHMR_08O13	a	a	a	a	b	b	b	b	a	-	a	a	a	b	b	b	a	b	b	a	a	a	b	b	a	a	a	b	b	a	a	b	a	b	b	a	b	a	a	a	a	b	b	b	a	b	b	b	a
AHMR_08O14	a	b	a	b	b	a	b	a	b	a	a	a	a	b	a	b	b	b	b	a	a	b	a	b	b	a	a	b	b	b	b	b	b	b	-	b	b	b	a	a	b	b	a	a	b	a	a	b	b
AHMR_09B12	b	a	b	b	b	-	a	b	a	a	b	a	b	b	a	b	b	a	a	a	a	a	a	a	b	b	a	a	a	a	a	a	b	a	b	a	a	a	b	a	b	a	-	a	b	b	b	a	-
AHMR_09C02	a	b	a	a	a	a	a	b	b	b	a	a	b	b	b	a	b	b	a	a	a	a	b	a	b	b	a	a	b	a	b	a	b	a	a	a	a	a	b	b	a	a	a	a	a	a	b	a	b
AHMR_09E24	a	a	b	b	a	-	b	b	a	a	b	b	b	-	-	b	a	b	b	a	b	a	a	b	a	b	b	a	a	b	b	a	b	a	b	b	a	a	a	a	b	b	b	a	b	b	b	a	b
AHMR_09F03	b	a	b	b	b	-	a	b	a	a	b	a	b	b	a	b	b	a	a	a	a	a	a	a	b	b	a	a	a	a	-	a	b	a	b	-	a	a	b	a	b	a	a	a	b	b	b	a	b
AHMR_09F05	a	b	a	b	b	a	a	a	b	b	a	a	b	-	b	b	a	a	b	b	-	a	a	b	b	a	b	a	b	b	b	b	a	b	a	b	a	a	b	b	b	a	a	a	b	b	b	b	a
AHMR_09F21	b	a	a	a	a	b	a	b	b	a	b	a	a	b	b	a	b	a	a	a	a	a	a	a	a	b	b	b	b	b	a	a	a	b	a	b	b	a	a	b	b	b	a	b	b	b	b	a	a
AHMR_09G13	b	b	a	a	b	a	a	b	a	b	b	b	b	a	b	a	b	b	a	b	a	a	a	b	a	b	a	b	b	a	a	a	a	b	b	b	b	a	b	b	b	a	a	a	a	a	b	a	b
AHMR_09J09	b	a	b	b	a	a	a	b	b	b	a	a	b	a	b	a	b	a	b	a	b	a	-	b	b	b	b	a	b	a	b	b	a	a	a	b	b	b	b	a	a	a	b	b	a	a	b	a	b
AHMR_09J16*	a	b	a	b	a	a	b	a	a	a	a	a	a	b	a	b	a	b	a	b	b	b	a	a	a	b	a	a	a	a	a	a	a	a	a	b	a	a	a	b	b	a	a	b	a	a	a	b	a
AHMR_09J19	b	a	a	b	a	a	a	a	b	b	a	a	a	a	b	b	a	a	b	b	a	a	b	b	b	-	b	a	-	a	b	-	a	a	a	b	b	b	b	a	a	a	b	b	a	b	a	a	b
AHMR_09J21	b	a	b	a	b	a	a	b	a	b	a	b	b	-	b	a	b	b	b	a	b	a	b	b	b	b	b	a	b	-	b	b	a	a	a	b	b	b	b	a	a	a	b	b	a	a	b	a	b
AHMR_09L01	a	b	a	a	b	b	a	a	b	b	b	a	b	b	a	a	b	a	b	a	a	b	a	a	b	a	b	a	b	a	b	a	b	a	a	b	b	a	b	b	b	a	a	b	b	a	b	b	a
AHMR_09L16	a	a	a	a	a	a	b	b	a	a	b	b	b	b	b	a	b	b	a	a	a	b	a	a	b	a	a	b	b	b	b	b	b	a	a	b	a	a	b	b	b	a	a	a	a	b	a	a	b
AHMR_09M15**	b	b	b	a	a	a	a	a	b	b	a	a	b	a	b	a	b	b	a	a	a	b	a	a	b	b	b	a	a	a	b	a	a	a	a	a	a	a	b	b	a	a	a	a	a	a	b	a	b
AHMR_10B10	a	b	b	b	b	a	a	a	b	b	a	a	b	b	b	b	a	a	b	b	b	a	a	b	b	a	b	a	b	b	b	b	a	b	a	b	a	a	b	a	b	a	b	a	b	b	b	b	a
AHMR_10C07	a	b	b	b	b	a	b	a	a	a	b	b	b	a	b	a	-	-	a	a	a	b	a	b	a	a	b	a	a	a	b	a	a	-	-	b	b	a	-	b	-	a	a	b	a	a	a	b	a
AHMR_10C13	a	a	b	a	a	a	a	b	a	b	b	a	a	a	a	b	a	a	a	b	b	a	b	a	b	b	a	b	a	a	b	b	a	b	a	b	a	b	b	b	b	b	a	a	b	b	b	b	a
AHMR_10D02	b	a	b	b	b	b	a	b	a	a	b	a	b	b	a	b	b	a	a	a	a	a	a	a	b	b	a	a	a	a	a	a	b	a	b	a	a	a	b	a	b	a	a	a	b	b	b	a	b
AHMR_10E11**	a	a	b	b	b	b	a	b	a	a	a	b	a	b	b	b	b	b	b	b	b	a	a	b	a	b	b	a	a	b	b	a	a	b	b	a	a	a	b	b	a	a	b	b	b	b	b	b	b
AHMR_10F19	a	a	b	b	a	a	a	b	a	a	b	b	a	b	a	b	b	a	b	a	a	a	b	a	b	a	a	a	a	b	b	a	b	a	a	b	a	a	a	a	a	a	b	a	a	b	b	b	a
AHMR_10I07	a	b	a	a	b	b	a	a	b	b	b	a	b	b	a	a	b	a	b	a	a	b	a	a	b	a	b	a	b	a	b	a	b	a	a	b	b	a	b	b	b	a	a	b	b	a	b	b	a
AHMR_10J02	a	b	a	b	b	a	b	a	b	-	a	b	a	b	a	b	b	a	b	a	a	b	a	a	b	a	b	a	b	b	b	b	-	b	b	b	b	b	a	a	b	b	a	a	b	a	a	b	b
AHMR_10J22	a	b	b	b	a	a	b	b	b	a	a	a	a	b	b	a	b	b	a	a	a	b	a	a	b	a	a	b	a	a	b	b	a	a	b	b	a	a	b	a	a	b	b	b	b	a	a	b	a
AHMR_10K08	a	b	b	b	a	b	a	a	a	b	b	b	a	a	b	a	b	a	b	a	a	b	a	b	a	a	a	b	a	a	b	a	a	a	b	b	b	b	b	b	a	a	a	b	a	b	a	b	a
AHMR_10L17	a	a	a	a	b	b	b	b	a	b	a	a	a	a	b	b	a	b	a	a	a	a	b	b	b	a	a	b	b	a	a	a	b	b	b	a	b	a	a	a	b	b	b	b	a	b	b	b	a
AHMR_10M08	a	b	b	a	a	b	b	b	a	b	a	a	b	a	a	b	b	a	b	a	a	a	a	b	b	a	a	a	a	a	b	b	a	b	b	a	b	a	b	b	b	a	a	a	a	a	b	a	b
AHMR_10N20	a	b	b	b	b	a	a	a	b	b	a	a	b	b	b	b	a	a	b	b	b	a	a	b	b	a	b	a	b	b	b	b	a	b	a	b	a	a	b	a	b	a	b	a	b	b	b	b	a
AHMR_10O24*	a	a	a	b	a	b	a	b	b	b	b	a	a	a	b	b	b	b	a	a	b	b	b	b	a	b	b	a	a	b	a	b	a	b	b	a	b	a	b	b	a	b	a	b	a	b	b	b	b
AHMR_11A21	a	a	b	b	a	a	b	a	a	a	b	a	a	b	b	b	b	b	a	a	b	b	b	b	a	b	a	b	a	a	a	a	a	b	b	a	b	a	b	b	a	a	a	b	a	b	b	b	b
AHMR_11B18	a	a	a	a	b	b	b	b	a	b	a	a	a	a	b	b	a	b	a	a	a	a	b	b	b	a	a	b	b	a	a	a	b	b	b	a	b	a	a	a	b	b	b	b	a	b	b	b	a
AHMR_11C18	a	b	a	a	b	b	a	b	a	b	a	a	b	b	a	a	a	b	a	a	b	a	a	a	b	a	b	a	b	a	b	a	a	a	a	b	b	b	b	a	a	b	a	b	b	a	b	b	a
AHMR_11F08	b	b	b	a	a	b	a	a	a	b	a	a	b	-	a	b	a	a	b	a	a	a	b	b	b	b	b	a	b	a	a	b	b	b	a	a	b	b	b	b	a	a	a	b	a	b	b	b	a
AHMR_11F12	b	a	b	a	a	a	a	b	a	b	a	b	b	b	b	a	b	b	a	a	b	b	-	b	a	a	a	b	b	b	b	a	a	a	b	a	a	a	b	a	b	b	a	a	a	a	b	a	b
AHMR_11F21	b	a	b	a	b	a	a	b	a	b	a	b	b	b	b	-	b	b	b	a	b	a	b	b	b	b	b	a	b	a	b	b	a	a	a	b	b	b	b	a	a	a	b	b	a	a	b	a	b
AHMR_11G19	a	a	b	a	a	b	a	a	a	b	a	b	a	b	a	a	b	a	b	a	a	b	a	b	a	a	a	b	a	a	b	a	a	b	b	b	b	b	b	b	b	a	b	b	a	b	-	b	b
AHMR_11L05	b	b	a	a	a	b	b	b	b	a	b	a	a	a	a	a	b	a	a	b	a	a	a	b	b	b	b	b	a	b	a	b	a	b	a	b	a	b	a	b	b	b	a	b	b	b	a	a	a
AHMR_11M02	a	a	a	a	a	b	a	b	b	a	b	a	a	b	b	a	a	b	a	a	a	a	a	b	a	a	a	b	b	b	a	b	-	b	b	a	b	a	b	a	b	b	b	b	b	b	a	b	a
AHMR_11N15	b	b	b	a	b	b	b	b	a	a	a	a	b	a	a	a	b	a	b	b	a	a	b	b	b	b	a	b	b	a	b	b	a	b	b	b	b	a	b	b	b	a	a	b	a	a	b	a	b
AHMR_11P01*	a	a	b	a	a	a	a	b	a	b	a	b	b	b	b	b	b	a	a	a	a	a	a	a	a	-	a	a	a	a	a	-	-	a	a	b	a	b	a	a	b	a	a	b	a	b	b	a	a
AHMR_11P20	a	b	b	b	b	a	a	a	b	b	a	a	b	b	b	b	a	a	b	b	b	a	a	b	b	a	b	a	b	b	b	b	a	b	a	b	a	a	b	a	b	a	b	a	a	b	b	b	a
AHMR_12B02	a	b	b	b	a	a	b	b	b	a	a	a	a	b	b	a	b	b	-	a	a	b	a	-	b	a	a	b	a	a	b	b	a	a	b	b	a	-	b	a	a	b	b	b	b	a	a	b	a
AHMR_12B18	b	b	b	a	b	b	b	b	a	a	a	a	b	a	a	a	b	a	b	b	a	a	b	b	b	b	a	b	b	a	b	b	a	b	b	b	b	-	b	b	b	a	a	b	a	a	b	a	b
AHMR_12F18	b	b	b	b	b	a	b	a	b	b	a	a	a	b	a	b	b	b	b	a	b	b	a	b	a	a	a	b	b	b	b	a	b	b	b	b	b	b	a	a	b	b	a	a	b	a	a	a	b
AHMR_12F24	b	a	a	a	a	b	a	b	b	a	b	a	a	a	b	a	b	a	a	a	a	a	a	a	b	b	b	b	a	b	a	b	a	b	a	b	a	b	a	b	b	b	a	b	b	b	b	a	a
AHMR_12G11	-	a	a	a	b	a	b	a	a	a	-	b	a	a	a	b	a	b	b	b	b	b	a	a	b	b	b	a	a	a	b	a	b	b	a	a	a	b	a	b	a	a	b	-	a	b	b	b	a
AHMR_12G17	a	a	a	b	a	a	a	b	a	a	b	b	a	b	b	a	b	b	a	b	b	a	b	b	a	a	a	b	a	b	b	b	b	b	a	b	a	b	a	b	a	a	a	a	b	b	a	a	b
AHMR_12G20	b	b	a	a	b	a	a	b	a	-	-	b	b	a	b	a	b	b	a	b	a	a	a	b	a	b	a	b	b	a	a	a	a	b	b	b	b	a	b	b	b	a	a	a	a	a	b	a	b
AHMR_12H07	b	a	b	b	b	b	a	b	a	a	b	a	b	b	a	b	b	a	a	a	a	a	a	a	b	b	a	a	a	a	a	a	b	a	b	a	a	a	b	a	b	a	a	a	b	b	b	a	b
AHMR_12H08	b	a	a	a	b	a	b	-	a	a	a	b	a	a	a	b	a	b	b	b	b	b	a	a	b	b	-	a	a	a	b	-	b	b	-	a	a	b	a	b	a	a	b	a	a	b	-	b	-
AHMR_12K09	b	a	b	a	b	a	a	b	a	b	a	b	b	b	b	a	b	b	b	a	b	a	b	b	b	b	b	a	b	a	b	b	a	a	a	b	b	b	b	a	a	a	b	b	a	a	b	a	b
AHMR_12P10	a	b	a	a	a	a	a	b	b	b	a	a	b	b	b	a	b	b	a	a	a	a	b	a	b	b	a	a	b	a	b	a	b	a	a	a	a	a	b	b	a	a	a	a	a	a	b	a	b
AHMR_13A18	b	a	a	b	a	a	a	a	b	b	a	a	a	a	b	b	a	a	b	b	a	a	b	b	b	b	b	a	b	a	b	b	a	a	a	b	b	b	b	a	a	a	b	b	a	b	a	a	b
AHMR_13C23	a	a	a	a	b	b	b	b	a	b	a	a	a	a	b	b	a	b	a	a	a	a	b	b	b	a	a	b	b	a	a	a	b	b	b	a	b	a	a	a	b	b	b	b	a	b	b	b	a
AHMR_13E17	a	a	a	b	a	a	b	b	a	b	a	a	b	b	b	a	b	a	b	a	b	a	b	b	b	b	b	a	b	b	a	a	a	b	b	b	a	a	b	a	b	b	a	a	b	a	a	a	a
AHMR_13F07	a	b	b	a	b	b	a	b	a	b	a	a	b	-	a	a	a	b	a	b	a	a	a	a	b	a	b	a	b	a	b	a	a	a	a	b	b	b	b	a	a	b	a	b	b	a	b	b	a
AHMR_13F19	a	a	a	a	a	b	a	b	b	a	b	a	a	a	b	b	b	a	b	a	b	a	b	b	b	a	b	a	a	b	a	b	a	b	a	b	b	a	a	b	a	b	a	b	a	b	b	b	a
AHMR_13H11	a	b	a	a	a	a	a	b	b	b	a	a	b	b	b	a	b	b	a	a	a	a	b	a	b	b	a	a	b	a	b	a	b	a	a	a	a	a	b	b	a	a	a	a	a	a	b	a	b
AHMR_13I03	-	b	a	a	a	a	b	b	b	b	b	a	a	a	a	b	a	b	b	a	a	b	b	b	b	a	b	a	a	a	b	b	b	a	b	a	b	a	a	a	b	a	b	a	a	a	b	a	b
AHMR_13I15	b	a	b	b	b	-	a	b	a	a	b	a	b	b	a	b	b	a	a	a	a	a	a	a	b	b	a	a	a	a	a	a	b	a	b	a	a	a	b	a	b	a	a	a	b	b	b	a	b
AHMR_13I16	b	a	a	a	b	a	b	a	a	a	a	b	a	a	a	b	a	b	b	b	b	b	a	a	b	-	b	a	a	a	b	a	b	b	a	a	a	b	a	b	a	a	b	a	a	b	b	b	a
AHMR_13K02	a	b	a	a	b	b	a	a	b	b	b	a	b	b	a	a	b	a	b	a	a	b	a	a	b	a	b	a	b	a	b	a	b	a	a	b	b	a	b	b	b	a	a	b	b	a	b	b	a
AHMR_13L19	a	b	a	b	b	a	b	a	b	b	a	b	a	b	a	b	b	a	b	a	a	b	a	a	b	a	b	a	b	b	b	b	b	b	b	b	b	b	a	a	b	b	a	a	b	a	a	b	b
AHMR_13M03	a	b	a	b	b	a	b	a	b	b	a	b	a	b	a	b	a	a	b	a	a	b	a	a	b	a	b	a	b	b	b	-	b	b	b	a	b	b	a	a	b	b	a	a	b	a	a	b	b
AHMR_13M17	b	a	a	b	a	a	a	a	b	b	a	a	a	a	b	b	a	a	b	b	a	b	a	b	b	b	b	a	b	a	b	b	a	a	a	b	b	b	b	a	a	a	b	b	a	b	a	a	b
AHMR_13N03	a	b	b	a	a	b	b	b	a	a	b	a	b	b	b	b	b	b	a	a	a	b	a	b	b	a	a	a	a	a	a	b	a	a	b	a	b	a	a	a	b	a	b	a	a	a	a	a	b
AHMR_13N16	b	a	b	a	b	a	a	b	a	b	a	b	b	b	b	a	-	b	b	a	b	-	b	b	b	b	b	a	-	a	b	b	a	a	a	b	-	b	b	a	a	a	b	b	a	a	b	a	b
AHMR_13O01	a	b	a	a	b	b	a	b	a	b	a	a	b	b	a	a	b	b	a	a	b	a	a	a	b	a	b	a	b	a	b	a	a	a	a	b	b	b	b	a	a	b	a	b	b	a	b	b	a
AHMR_13P06***	a	a	b	b	b	a	b	b	b	b	a	b	a	b	a	a	b	b	b	b	b	b	b	b	b	b	b	b	b	b	a	a	a	b	b	b	b	a	b	a	b	b	b	b	b	b	b	b	a
AHMR_13P12	a	a	b	b	a	a	b	a	a	a	b	a	a	b	b	b	b	b	a	a	b	b	b	-	a	b	a	b	a	a	a	a	a	b	b	a	b	a	b	b	a	a	a	b	a	b	b	b	b
AHMR_13P19	a	a	b	b	a	a	a	b	a	b	b	a	a	a	a	a	b	b	a	-	a	b	b	b	a	a	b	a	a	a	b	a	b	a	a	b	b	b	a	b	b	a	a	b	a	b	a	b	a
AHMR_14A15	b	b	-	-	a	a	a	b	b	a	b	a	b	a	b	a	b	b	a	a	b	b	a	b	b	a	a	b	b	a	b	a	a	a	a	b	b	a	b	a	b	b	b	a	b	a	a	a	a
AHMR_14C13	b	b	b	a	b	a	a	b	a	b	a	b	b	b	b	a	b	b	b	a	b	a	b	b	b	b	b	a	b	a	b	b	a	a	a	b	b	a	b	a	a	b	a	b	a	a	b	a	b
AHMR_14E04	a	a	a	b	a	a	a	b	a	a	b	b	a	b	b	a	b	b	a	b	b	a	b	b	a	a	a	b	a	b	b	b	b	b	a	b	a	b	a	b	a	a	a	a	b	b	a	a	b
AHMR_14F04	a	b	b	b	a	a	b	b	b	a	a	a	a	b	a	a	b	b	a	b	a	b	a	a	b	a	a	b	a	a	b	b	a	a	b	b	a	a	b	b	a	b	a	b	b	a	a	b	a
AHMR_14F08	a	b	b	b	b	a	a	a	b	b	a	a	b	b	b	b	a	a	b	b	b	a	a	b	b	a	b	a	b	b	b	b	a	b	a	b	a	a	b	a	b	a	b	a	a	b	b	b	a
AHMR_14H12	a	b	a	a	b	b	a	a	a	a	b	a	a	b	a	b	-	b	a	b	b	b	a	b	a	a	b	a	-	b	b	b	b	a	b	b	a	a	-	a	b	b	b	a	a	b	b	a	b
AHMR_14H13**	b	b	b	a	a	a	a	a	b	-	a	a	b	a	b	a	b	b	-	a	a	-	a	a	b	-	b	a	b	a	b	a	a	a	a	a	a	a	b	b	a	a	a	a	a	a	b	a	b
AHMR_14J04	a	a	a	a	b	b	b	b	a	b	a	a	a	a	a	b	a	b	a	a	a	a	b	b	b	a	a	b	b	a	a	a	b	b	b	a	a	a	a	a	b	b	b	b	a	b	b	b	a
AHMR_14K08	b	a	b	b	b	b	a	b	a	a	b	a	b	b	a	b	b	a	a	a	a	a	a	a	b	b	a	a	a	a	a	a	b	a	b	a	a	a	b	a	b	a	a	a	b	b	b	a	b
AHMR_14K16	b	a	a	b	a	a	a	a	b	b	a	a	a	a	b	b	a	a	b	b	a	b	a	b	b	b	b	a	b	a	b	b	a	a	a	b	b	b	b	a	a	a	b	b	a	b	a	a	b
AHMR_14L02	a	a	a	b	a	a	b	b	a	b	a	a	b	b	a	a	b	a	b	b	b	a	b	b	b	b	b	a	a	b	a	a	b	b	b	b	a	a	b	b	a	a	a	a	b	b	a	a	b
AHMR_14L12*	a	a	a	b	a	b	a	b	b	b	b	a	a	a	b	b	b	b	a	a	b	b	b	b	a	b	b	a	a	b	a	b	a	b	b	a	b	a	b	b	a	b	a	b	a	b	b	b	b
AHMR_14L18	b	a	b	a	b	a	a	b	a	b	a	b	b	b	b	a	b	b	b	a	b	a	b	b	b	b	b	a	b	a	b	b	a	a	a	b	b	b	b	a	a	b	a	b	a	a	b	a	b
AHMR_14N02	a	a	a	a	a	a	b	b	a	a	b	b	b	b	b	a	b	b	a	a	a	b	a	a	b	a	a	b	b	b	b	b	b	a	a	b	a	a	b	b	b	a	a	a	a	b	a	a	b
AHMR_14N24	a	a	a	b	b	a	a	b	a	a	b	b	a	b	b	a	b	b	a	b	b	a	-	b	a	a	a	b	a	b	b	b	b	b	a	b	a	b	a	b	a	a	a	a	b	b	a	a	-
AHMR_14O11	b	a	a	b	a	a	a	a	b	b	a	a	a	a	b	b	a	a	b	b	a	a	b	b	b	b	b	a	b	a	b	b	a	a	a	b	b	b	b	a	a	a	b	b	a	b	a	a	b
AHMR_14P09	b	a	a	b	a	a	b	a	a	a	a	a	b	b	a	b	a	a	b	a	b	b	a	b	b	a	b	a	a	b	b	b	a	b	a	a	a	a	b	b	a	a	a	a	b	a	b	a	b
AHMR_14P20	a	a	a	a	b	b	b	b	a	b	a	a	a	a	a	b	a	b	a	a	a	a	b	b	b	a	a	b	b	a	a	a	b	b	b	a	a	a	a	a	b	b	b	b	a	b	b	b	a
AHMR_15A17	a	a	a	b	a	a	b	b	a	b	a	a	b	b	b	a	b	a	b	a	b	a	b	b	b	b	b	a	b	b	a	a	a	b	b	b	a	a	b	a	b	b	a	a	b	a	a	a	a
AHMR_15A20	b	a	b	b	b	b	a	b	-	a	b	a	b	b	a	b	b	a	a	a	a	a	a	a	b	b	a	a	a	a	a	a	b	a	b	a	a	a	b	a	b	a	a	a	b	b	b	a	b
AHMR_15C12	a	a	a	a	b	b	b	b	a	b	a	a	a	b	b	b	a	b	b	a	-	a	b	b	a	a	a	b	b	a	a	b	a	b	b	a	b	a	a	a	a	b	b	b	a	b	b	b	a
AHMR_15E02	b	b	b	a	b	a	a	b	a	b	a	b	b	b	b	a	b	b	b	a	b	a	b	b	b	b	b	a	b	a	b	b	a	a	a	b	b	a	b	a	a	b	a	b	a	a	b	a	b
AHMR_15G14	a	b	b	b	b	a	a	a	b	b	a	a	b	a	b	b	b	a	b	b	b	a	a	b	b	a	b	a	b	a	b	b	a	b	-	b	b	-	b	a	b	a	b	-	a	-	a	b	a
AHMR_15G24	b	a	b	b	b	b	a	b	a	a	b	a	b	b	a	b	b	a	a	a	a	a	a	a	b	b	a	a	a	a	a	a	b	a	b	a	a	a	b	a	b	a	a	a	b	b	b	a	b
AHMR_15H06	b	a	a	a	a	b	a	b	b	a	b	a	a	b	b	a	b	a	a	a	a	a	a	a	a	b	b	b	b	b	a	a	a	b	a	b	b	a	a	b	b	b	a	b	b	b	b	a	a
AHMR_15H19	a	b	b	b	b	a	a	a	-	a	a	a	b	a	b	b	b	a	b	b	b	a	a	b	b	a	b	a	b	a	b	b	a	-	a	-	a	a	b	a	b	a	b	a	a	b	b	b	a
AHMR_15I02	a	b	b	b	b	a	a	a	b	b	a	a	b	b	b	b	a	a	b	b	b	a	a	b	b	a	b	a	b	b	b	b	a	b	a	b	a	a	b	a	b	a	b	a	a	b	b	b	a
AHMR_15J09	a	a	a	a	b	b	b	b	-	-	a	a	a	b	b	b	a	b	b	a	a	a	b	b	a	a	a	b	b	a	a	b	a	-	b	a	b	a	a	a	a	b	b	b	a	b	b	b	a
AHMR_15J24	b	b	b	a	b	a	a	b	a	b	a	b	b	b	b	a	b	b	b	a	b	a	b	b	b	b	b	a	b	a	b	b	a	a	a	b	b	a	b	a	a	b	a	b	a	a	b	a	b
AHMR_15K01	-	a	b	b	b	b	a	b	a	a	b	a	b	b	a	-	-	a	a	a	a	a	a	a	b	b	a	a	a	a	a	a	b	a	-	a	a	a	b	a	b	a	a	a	b	b	b	a	b
AHMR_15K21	a	b	b	a	b	a	a	a	b	b	a	a	b	a	b	b	b	a	b	b	b	a	a	b	b	a	b	a	b	a	b	b	a	b	a	b	b	a	b	a	b	a	b	a	a	b	a	b	a
AHMR_15L21	a	b	-	b	b	a	a	a	b	a	a	a	b	a	b	b	a	a	b	b	b	a	a	b	b	a	b	a	b	a	b	b	a	b	a	b	a	a	b	a	b	a	b	a	a	b	b	b	a
AHMR_15N06	a	b	a	b	b	a	b	a	-	b	a	b	a	-	a	b	b	a	b	a	a	b	a	a	b	a	b	a	b	b	b	b	b	b	b	b	b	b	a	a	b	b	a	a	b	a	a	b	b
AHMR_15N19	a	b	a	a	a	a	a	a	-	a	a	a	-	b	b	b	a	a	b	b	b	b	a	b	b	a	b	-	b	b	b	b	a	b	a	b	a	a	b	b	a	a	a	a	b	a	b	a	b
AHMR_15O23	b	b	a	a	a	a	a	a	a	a	b	b	b	a	a	a	a	b	a	b	a	a	a	a	b	b	a	b	b	a	b	b	a	b	b	b	b	-	b	b	b	a	-	a	a	a	b	-	b
AHMR_16B05	a	a	b	a	a	a	a	b	a	b	a	b	b	b	b	b	b	a	a	a	a	a	a	a	a	b	a	a	a	a	a	b	b	a	a	b	a	b	a	a	b	a	a	b	a	b	b	a	a
AHMR_16E11	a	a	b	b	a	a	a	b	a	b	b	a	a	a	a	a	b	b	a	a	a	b	b	b	a	a	b	a	a	a	b	a	b	a	a	b	b	b	a	b	b	a	a	b	a	b	a	b	a
AHMR_16E22	b	a	b	b	a	a	a	b	b	a	b	a	b	-	b	a	b	b	a	a	b	b	a	b	a	a	a	b	b	b	b	a	a	a	a	b	b	a	b	a	b	b	b	a	a	a	a	a	a
AHMR_16F08	b	a	a	b	b	a	a	a	a	b	b	b	a	b	b	b	a	b	a	a	b	b	a	a	a	b	a	b	a	a	a	b	a	b	b	b	b	a	a	b	a	a	-	b	a	b	b	a	b
AHMR_16F19	a	b	a	a	b	b	b	a	a	a	b	a	a	a	a	b	a	b	a	b	b	b	a	a	a	a	b	a	b	a	b	a	b	a	b	a	a	a	b	b	a	a	b	a	a	b	-	b	a
AHMR_16G02	a	b	b	b	a	a	b	b	b	a	a	a	a	b	a	-	b	-	a	b	a	b	a	-	b	a	-	b	a	a	b	-	a	a	b	b	a	a	b	b	a	b	a	b	b	a	a	b	a
AHMR_16G04	a	b	a	b	b	a	a	a	b	a	a	a	b	b	b	b	a	a	b	b	b	b	a	b	b	a	b	a	b	b	b	b	a	b	a	b	a	a	b	b	a	a	a	a	b	b	b	b	a
AHMR_16H20*	a	a	b	a	a	a	a	b	a	b	a	b	b	b	b	b	b	a	a	a	a	a	a	a	a	b	a	a	a	a	a	-	-	a	a	b	a	b	a	a	b	a	a	b	a	b	b	a	a
AHMR_16I22	a	a	b	b	a	a	a	b	a	a	b	b	a	b	a	b	b	a	b	a	a	a	b	a	b	a	a	a	a	b	b	a	b	a	a	b	a	a	a	a	a	a	b	a	a	b	b	b	a
AHMR_16K20	a	a	a	a	b	b	b	b	a	b	a	a	a	a	b	b	a	b	b	a	a	a	b	b	b	a	a	b	b	a	a	b	b	b	b	a	b	a	a	a	b	b	b	b	a	b	b	b	a
AHMR_16M15	b	a	b	b	b	b	a	b	a	a	b	a	b	b	a	b	b	a	a	a	a	a	a	a	b	b	a	a	a	a	a	a	b	a	b	a	a	a	b	a	b	a	a	a	b	b	b	a	b
AHMR_16N06	a	a	b	a	a	a	a	b	a	b	a	b	b	b	b	b	b	a	a	a	a	a	a	a	a	b	a	a	a	a	a	b	b	a	a	b	a	b	a	a	b	a	a	b	a	b	b	a	a
AHMR_16N07	a	a	b	a	a	a	a	b	a	b	a	b	b	b	b	b	b	a	a	a	a	a	a	a	a	b	a	a	a	a	a	b	b	a	a	b	a	b	a	a	b	a	a	b	a	b	b	a	a
AHMR_16N21	b	a	a	a	a	b	b	b	a	a	b	b	a	a	a	b	a	b	a	a	a	b	a	b	b	b	b	a	a	b	b	b	b	b	a	a	b	b	a	b	b	a	a	b	a	a	a	a	b
AHMR_16O04	b	b	b	b	b	b	a	b	a	b	a	b	b	a	b	b	a	b	a	a	b	a	a	b	b	b	a	a	b	b	a	b	a	b	a	a	a	b	b	b	a	a	b	b	b	b	b	b	b
AHMR_16O10	b	a	b	a	b	b	a	a	b	a	a	a	a	b	a	a	b	b	a	b	a	a	a	-	b	a	b	a	b	b	b	b	b	b	b	a	b	b	a	b	b	b	a	b	b	b	b	a	b
AHMR_16P15**	b	b	a	a	a	a	b	a	a	a	a	a	a	b	a	b	a	b	a	b	b	b	a	a	a	b	a	a	a	a	a	a	a	a	a	b	a	-	a	a	b	a	b	a	a	a	a	b	a
BBMR_09A19	a	a	a	a	a	b	a	b	b	a	b	a	a	a	a	b	a	a	b	a	a	a	b	b	b	a	b	a	a	b	a	b	a	b	a	b	b	a	a	b	a	b	a	b	a	b	b	b	a
BBMR_09A21	a	a	a	a	a	b	a	b	b	a	b	a	a	a	a	b	a	a	b	a	a	a	b	b	b	a	b	a	a	b	a	b	a	b	a	b	b	a	a	b	a	b	a	b	a	b	b	b	a
BBMR_09C23	a	b	b	a	a	b	b	b	a	b	b	a	b	b	a	b	b	a	b	a	a	a	a	b	b	a	a	a	a	a	b	b	a	b	b	a	b	a	b	b	b	a	a	a	a	a	b	a	b
BBMR_09E12	b	a	a	b	a	a	b	a	b	b	a	b	a	b	b	b	a	b	b	b	a	b	a	b	a	a	b	a	b	b	a	-	a	a	a	a	b	b	b	b	a	a	a	b	b	b	a	b	a
BBMR_09J15	b	a	a	b	a	a	b	a	b	b	a	b	a	b	b	b	a	b	b	b	a	b	a	b	a	a	b	a	b	b	a	b	a	a	a	a	b	b	b	b	a	a	a	b	b	b	a	b	a
BBMR_09L07	a	a	b	b	a	a	a	b	a	a	b	a	a	b	a	b	b	a	b	a	a	a	b	a	b	a	a	a	a	b	b	a	b	a	a	b	a	b	a	a	a	a	b	a	a	b	b	b	a
BBMR_09L17	b	a	a	b	a	a	b	a	b	b	a	b	a	b	b	b	a	b	b	b	a	b	a	b	a	a	b	a	b	b	a	b	a	-	a	a	b	b	b	b	a	a	a	b	b	b	a	b	a
BBMR_09M06	a	a	a	a	a	b	a	b	b	a	b	a	a	a	a	b	a	a	b	a	a	a	b	b	b	a	b	a	a	b	a	b	a	b	a	b	b	a	a	b	a	b	a	b	a	b	b	b	a
BBMR_10A23	b	a	a	b	a	a	b	a	b	b	a	b	a	b	b	b	a	b	b	b	a	b	a	b	a	a	b	a	b	b	a	b	a	a	a	a	b	b	b	b	a	a	a	b	b	b	a	b	a
BBMR_10B03	b	a	a	b	a	a	b	a	b	b	a	b	a	b	b	b	a	b	b	b	a	b	a	b	a	a	b	a	b	b	a	b	a	a	a	a	b	b	b	b	a	a	a	b	b	b	a	b	a
BBMR_10B16	b	a	a	b	a	a	b	a	b	b	a	b	a	b	b	b	a	b	b	b	a	b	a	b	a	a	b	a	b	b	a	b	a	a	a	a	b	b	b	b	a	a	a	b	b	b	-	b	a
BBMR_10D05	b	a	a	b	a	a	b	a	b	b	a	b	a	b	b	b	a	b	b	b	a	b	a	b	a	a	b	a	b	b	a	b	a	a	a	a	b	b	b	b	a	a	a	b	b	b	a	b	a
BBMR_10D11	a	a	a	a	a	b	a	b	b	a	b	a	a	a	a	b	a	a	b	a	a	a	b	b	b	a	b	a	a	b	a	b	a	b	a	b	b	a	a	b	a	b	a	b	a	b	b	b	a
BBMR_10E18	b	a	-	b	a	a	b	a	b	b	a	b	a	b	b	b	a	b	b	b	a	b	a	b	a	a	b	a	b	b	a	b	a	a	a	a	b	b	b	b	a	a	a	b	b	b	a	b	a
BBMR_10H01	a	b	b	a	a	b	b	b	a	b	b	a	b	b	a	b	b	a	b	a	a	a	a	b	b	a	a	a	a	a	b	b	a	b	b	a	b	a	b	b	b	a	a	a	a	a	b	a	b
BBMR_10I24	b	a	b	a	b	a	a	b	a	b	a	a	b	b	b	a	b	b	b	a	b	a	b	b	b	b	b	a	b	a	b	b	a	a	a	b	b	b	b	a	a	a	b	b	a	a	b	a	b
BBMR_10J11	a	b	b	a	a	b	b	b	a	b	b	-	b	b	a	b	b	a	b	a	a	a	a	b	b	a	a	a	a	a	b	b	a	b	b	a	b	a	b	b	b	a	a	a	a	a	b	a	b
BBMR_10K02	a	a	a	a	a	b	a	b	b	a	b	a	a	a	a	b	a	a	b	a	a	a	b	b	b	a	b	a	a	b	a	b	a	b	a	b	b	a	a	b	a	b	a	b	a	b	b	b	a
BBMR_10L08	b	a	a	b	a	a	b	a	b	b	a	b	a	b	b	b	a	b	b	b	a	b	-	b	a	a	b	a	b	b	a	b	a	a	a	a	b	b	b	b	a	a	a	b	b	b	-	b	a
BBMR_10O02	a	b	b	a	a	b	b	b	a	b	b	a	b	b	a	b	b	a	b	a	a	a	a	b	b	a	a	a	a	a	-	b	a	b	b	a	b	a	b	b	b	a	a	a	a	a	b	a	b
BBMR_10O16	b	a	a	b	a	a	b	a	b	b	a	b	a	b	b	b	a	b	b	b	a	b	a	b	a	a	b	a	b	b	a	b	a	a	a	a	b	b	b	b	a	a	a	b	b	b	a	b	a
BBMR_10P15	b	a	a	b	a	a	b	a	b	b	a	b	a	b	b	b	a	b	b	b	a	b	a	b	a	a	b	a	b	b	a	b	a	a	a	a	b	b	b	b	a	a	a	b	b	b	a	b	a
BBMR_11C21	b	a	a	b	a	a	b	a	b	b	a	b	a	b	b	b	a	b	b	b	a	b	a	b	a	a	b	a	b	b	a	b	a	a	a	a	b	b	b	b	a	a	a	b	b	b	a	b	a
BBMR_11E01	b	a	a	a	a	a	b	a	a	a	a	a	b	b	b	b	a	a	b	a	b	b	a	b	b	a	b	a	a	b	b	b	a	b	a	a	a	a	b	b	a	a	a	a	b	a	b	a	b
BBMR_11E07	b	a	a	b	a	a	b	a	b	b	a	b	a	b	b	b	a	b	b	b	a	b	a	b	a	a	b	a	b	b	a	b	a	a	a	a	b	b	b	b	a	a	a	b	b	b	a	b	a
BBMR_11E24	b	b	a	b	b	a	a	a	b	b	a	b	a	b	a	a	a	a	b	a	b	a	b	a	b	a	a	a	a	a	a	a	a	a	a	b	b	b	b	b	a	a	a	a	b	b	b	a	b
BBMR_11G04	b	a	a	b	a	a	b	a	b	b	a	b	a	b	b	b	a	b	b	b	a	b	a	b	a	a	b	a	b	b	a	-	a	a	a	a	b	b	b	b	a	a	a	b	b	b	a	b	a
BBMR_11J04	a	a	a	a	a	b	a	b	b	a	b	a	a	a	a	b	a	a	b	a	a	a	b	b	b	a	b	a	a	b	a	b	a	b	a	b	b	a	a	b	a	b	a	b	a	b	b	b	a
BBMR_11K06	a	a	a	a	a	b	-	b	b	a	b	-	-	a	a	b	a	a	b	a	a	a	b	b	b	a	b	a	a	b	a	b	a	b	a	b	b	a	a	b	a	b	a	b	a	b	b	b	a
BBMR_11L21	b	a	a	b	a	a	b	a	b	b	a	b	a	b	b	b	a	b	b	b	a	b	a	b	a	a	b	a	b	b	a	b	a	a	a	a	b	b	b	b	a	a	a	-	b	b	a	b	a
BBMR_11N06	b	a	a	b	a	a	b	a	b	b	a	b	a	b	b	b	a	b	b	b	a	b	a	b	a	a	b	a	b	b	a	b	a	a	a	a	b	b	b	b	a	a	a	b	b	b	a	b	a
BBMR_11N20	b	a	a	b	a	a	b	-	b	b	a	b	a	b	b	b	a	b	b	b	a	b	a	b	a	a	b	a	b	b	a	b	a	a	a	a	b	b	b	b	a	a	a	b	b	b	a	b	a
BBMR_11P06	b	a	a	b	a	a	b	a	b	b	a	b	a	b	b	b	a	b	b	b	a	b	a	b	a	a	b	a	b	b	a	b	a	a	a	a	b	b	b	b	a	a	a	b	b	b	a	b	a
BBMR_12A21	a	a	a	a	a	b	a	b	b	a	b	a	a	a	a	b	a	a	b	a	a	a	b	b	b	a	b	a	a	b	a	b	a	b	a	b	b	a	a	b	a	b	a	b	a	b	b	b	a
BBMR_12B03	b	a	a	b	a	a	b	a	b	b	a	b	-	b	b	b	a	b	b	b	a	b	a	b	a	a	b	a	b	b	a	-	a	a	a	a	b	b	b	b	a	a	a	b	b	b	a	b	a
BBMR_12C01	b	a	a	b	a	a	b	a	b	b	a	b	a	b	b	b	a	b	b	b	a	b	a	b	a	a	b	a	b	b	a	b	a	a	a	a	b	b	b	b	a	a	a	b	b	b	a	b	a
BBMR_12C03	a	b	a	b	b	a	b	a	b	b	a	b	a	b	a	b	b	a	b	a	a	b	a	a	b	a	b	a	b	b	b	b	b	b	b	b	b	b	a	a	b	b	a	a	b	a	a	b	b
BBMR_12G07	b	a	a	b	a	a	b	a	b	b	a	b	a	b	b	b	a	b	b	b	a	b	a	b	a	a	b	a	b	b	a	b	a	a	a	a	b	b	b	b	a	a	a	b	b	b	a	b	a
BBMR_12H19	a	a	a	a	a	b	a	b	b	a	b	a	a	-	a	b	a	a	b	a	a	a	b	b	b	a	b	a	a	b	a	b	a	b	a	b	b	a	a	b	a	b	a	b	a	b	b	b	a
BBMR_12I11	b	a	a	b	a	a	b	a	b	b	a	b	a	b	b	b	a	b	b	b	a	b	a	b	a	a	b	a	b	b	a	b	a	a	a	a	b	b	b	b	a	a	a	b	b	b	a	b	a
BBMR_12I21	b	a	a	b	a	a	b	a	b	b	a	b	a	b	b	b	a	b	b	b	a	b	a	b	a	a	b	a	b	b	a	b	a	a	a	a	b	b	b	b	a	a	a	b	b	b	a	b	a
BBMR_12I22	b	a	a	b	a	a	b	a	b	b	a	b	a	b	b	b	a	b	b	b	a	b	a	b	a	a	b	a	b	b	a	b	a	a	a	a	b	b	b	b	-	a	a	b	b	b	a	b	a
BBMR_12K09	a	b	b	a	b	a	a	a	a	a	b	b	b	a	b	a	b	b	a	a	a	b	a	b	b	a	b	a	a	a	b	a	b	b	b	b	b	a	b	b	b	a	a	b	a	a	a	b	a
BBMR_12K20	a	a	a	a	a	b	-	b	b	a	b	a	a	a	a	-	a	-	b	a	a	a	b	b	b	a	b	a	a	b	a	b	a	b	a	b	b	a	a	b	a	b	a	b	a	b	b	b	a
BBMR_12L03	a	a	a	a	a	b	a	b	b	a	b	a	a	a	a	b	a	a	b	a	a	a	b	b	b	a	b	a	a	b	a	b	a	b	a	b	b	a	a	b	a	b	a	b	a	b	b	b	a
BBMR_12L23	b	a	a	b	a	a	b	a	b	b	a	b	a	b	b	b	a	b	b	b	a	b	a	b	a	a	b	a	b	b	a	b	a	a	a	a	b	b	b	b	a	-	a	b	b	b	a	b	a
BBMR_12M01*	b	a	b	b	b	a	a	b	b	b	a	b	b	b	b	b	b	b	b	a	b	a	b	b	b	b	b	a	b	a	b	b	a	a	a	b	b	b	b	a	a	b	-	b	a	a	b	a	b
BBMR_12M14	b	a	a	b	a	a	b	a	b	b	a	b	a	b	b	b	a	b	b	b	a	b	a	b	a	a	b	a	b	b	a	-	a	a	a	a	b	b	b	b	a	a	a	b	b	b	a	b	a
BBMR_12M20	b	a	a	b	a	a	b	a	b	b	a	b	a	b	b	b	a	b	b	b	a	b	a	b	a	a	b	a	b	b	a	b	a	a	a	a	b	b	b	b	-	a	a	b	b	b	a	b	a
BBMR_12M23	b	a	a	b	a	a	b	a	b	b	a	b	a	b	b	b	a	b	b	b	a	b	a	b	a	a	b	a	b	b	a	b	a	a	a	a	b	b	b	b	a	a	a	-	b	b	a	b	-
BBMR_12N02	b	a	a	b	a	a	b	a	b	b	a	b	a	b	b	b	a	b	b	b	a	b	a	b	a	a	b	a	b	b	a	b	a	a	a	a	b	b	b	b	a	a	a	b	b	b	a	b	a
BBMR_12N14	a	a	b	a	a	b	-	a	a	a	a	b	a	b	a	-	b	a	b	b	a	-	a	b	a	a	a	b	a	a	b	a	a	b	b	b	b	b	b	b	b	a	b	b	-	b	a	b	b
BBMR_12P08	b	a	a	b	a	a	b	a	b	b	a	b	a	b	b	b	a	b	b	b	a	b	a	b	a	a	b	a	b	b	a	b	a	a	a	a	b	b	b	b	a	a	a	b	b	b	a	b	a
BBMR_13A03	a	a	a	a	a	b	a	b	b	a	b	a	a	a	a	b	a	a	b	a	a	a	b	b	b	a	b	a	a	b	a	b	a	b	a	b	b	a	a	b	a	b	a	b	a	b	b	b	a
BBMR_13A15	a	a	a	a	a	b	a	b	b	a	b	a	a	a	a	b	a	a	b	a	a	a	b	b	b	a	b	a	a	b	a	b	a	b	a	b	b	a	a	b	a	b	a	b	a	b	b	b	a
BBMR_13C07	b	a	a	b	a	a	b	a	b	b	a	b	a	b	b	b	a	b	b	b	a	b	a	b	a	a	b	a	b	b	a	b	a	a	a	a	b	b	b	b	a	a	a	b	b	b	a	b	a
BBMR_13C18	b	a	a	b	a	a	b	a	b	b	a	b	a	b	b	b	a	b	b	b	a	b	a	b	a	a	b	a	b	b	a	b	a	a	a	a	b	b	b	b	a	a	a	b	b	b	a	b	a
BBMR_13D02	b	a	a	b	a	a	b	a	b	b	a	b	a	b	b	b	a	b	b	b	a	b	a	b	a	a	b	a	b	b	a	b	a	a	a	a	b	b	b	b	a	a	a	b	b	b	a	b	a
BBMR_13D22**	b	a	b	b	b	a	a	b	b	b	a	b	b	b	b	b	b	b	b	a	b	a	b	b	b	b	b	a	b	a	b	b	a	a	a	b	b	b	b	a	a	b	b	b	a	a	b	a	b
BBMR_13D23	a	a	a	a	a	b	b	a	b	b	b	b	a	a	a	b	a	a	b	a	a	b	a	b	b	b	b	a	a	b	b	b	b	b	a	a	b	b	a	a	b	b	a	b	a	a	a	b	b
BBMR_13E20	b	a	a	b	a	a	b	a	b	b	a	b	a	b	b	b	a	b	b	b	a	b	a	b	a	a	b	a	b	b	a	b	a	a	a	a	b	b	b	b	a	a	a	b	b	b	-	b	a
BBMR_13G02	b	a	a	b	a	a	b	a	b	b	a	b	a	b	b	b	a	b	b	b	a	b	a	b	a	a	b	a	b	b	a	b	a	a	a	a	b	b	b	b	a	a	a	b	b	b	a	b	a
BBMR_13G12	a	b	b	a	b	a	a	a	b	a	b	a	b	b	b	a	b	a	a	a	a	b	a	a	b	a	b	a	b	a	b	a	b	b	a	b	b	a	b	b	b	a	a	a	b	a	b	b	a
BBMR_13H04	b	a	a	b	a	a	b	a	b	b	a	b	a	b	b	b	a	b	b	b	a	b	a	b	a	a	b	a	b	b	a	b	a	a	a	a	b	b	b	b	a	a	a	b	b	b	a	b	a
BBMR_13J11	a	b	b	a	a	b	b	b	a	b	b	a	b	b	a	b	b	a	b	a	a	a	a	b	b	a	a	a	a	a	b	b	a	b	b	a	b	a	b	b	b	a	a	a	a	a	b	a	b
BBMR_13K02	b	a	a	b	a	a	b	a	b	b	a	b	a	b	b	b	a	b	b	b	a	b	a	b	a	a	b	a	b	b	a	b	a	a	a	a	b	b	b	b	a	a	a	b	b	b	a	b	a
BBMR_13L06	b	a	a	b	a	a	b	a	b	b	a	b	a	b	b	b	a	b	b	b	a	b	a	b	a	a	b	a	b	b	a	b	a	a	a	a	b	b	b	b	a	a	a	b	b	b	a	b	a
BBMR_13L09	a	a	b	a	a	b	-	b	a	a	b	b	b	b	b	b	b	b	-	-	a	b	a	b	b	a	-	a	a	a	a	b	b	a	b	a	b	a	a	a	b	a	b	a	a	-	a	a	b
BBMR_13L12	b	a	a	b	a	a	b	a	b	b	a	b	a	b	b	b	a	b	b	b	a	b	a	b	a	a	b	a	b	b	a	b	a	a	a	a	b	b	b	b	a	a	a	b	b	b	a	b	a
BBMR_13M17	a	a	a	a	a	b	a	b	b	a	b	a	a	a	a	b	a	a	b	a	a	a	b	b	b	a	b	a	a	b	a	b	a	b	a	b	b	a	a	b	a	b	a	b	a	b	b	b	a
BBMR_13O01	a	a	a	a	b	b	b	b	a	a	a	a	b	b	b	a	b	b	a	b	a	b	a	b	a	a	b	a	b	b	b	b	b	a	a	a	b	a	a	b	a	a	a	b	a	a	b	b	a
BBMR_13O19	b	a	a	b	a	a	b	a	b	b	a	b	a	b	b	b	a	b	b	b	a	b	a	b	a	a	b	a	b	b	a	b	a	a	a	a	b	b	b	b	a	a	a	b	b	b	a	b	a
BBMR_14A14	b	a	a	b	a	a	b	a	b	b	a	b	a	b	b	b	a	b	b	b	a	b	a	b	a	a	b	a	b	b	a	b	a	a	a	a	b	b	b	b	a	a	a	b	b	b	a	b	a
BBMR_14B20	b	a	a	b	a	a	b	a	b	b	a	b	a	b	b	b	a	b	b	b	a	b	a	b	a	a	b	a	b	b	-	b	a	a	a	a	b	b	b	b	a	a	a	b	b	b	a	b	a
BBMR_14C05	b	a	a	b	a	a	b	a	b	b	a	b	a	b	b	b	a	b	b	b	a	b	a	b	a	a	b	a	b	b	a	b	a	a	a	a	b	b	b	b	a	a	a	b	b	b	a	b	a
BBMR_14E02	b	a	a	b	a	a	b	a	b	b	a	b	a	b	b	b	a	b	b	b	a	b	a	b	a	a	b	a	b	b	a	b	a	a	a	a	b	b	b	b	a	a	a	b	b	b	a	b	a
BBMR_14E11	a	a	a	a	a	b	b	a	-	b	b	b	a	a	a	-	a	a	b	a	a	b	a	b	b	b	b	a	a	b	b	b	b	b	a	a	b	b	a	a	b	b	a	b	a	a	a	b	b
BBMR_14E14	b	a	a	b	a	a	b	a	b	b	a	b	a	b	b	b	a	b	b	b	a	b	a	b	a	a	b	a	b	b	a	b	a	a	a	a	b	b	b	b	a	a	a	b	b	b	a	b	a
BBMR_14G02	b	a	a	b	a	a	b	a	b	b	a	b	a	b	b	b	a	b	b	b	a	b	a	b	a	a	b	a	b	b	a	b	a	a	a	a	b	b	b	b	a	a	a	b	b	b	a	b	a
BBMR_14H02	a	b	a	b	b	a	b	a	b	b	b	b	a	b	a	b	a	a	b	a	a	b	a	b	b	a	b	a	a	b	b	b	b	b	b	a	b	b	a	a	b	b	a	b	a	a	a	b	b
BBMR_14H23	b	a	a	b	a	a	b	a	b	b	a	b	a	b	b	b	a	b	b	b	a	b	a	b	a	a	b	a	b	b	a	b	a	a	a	a	b	b	b	b	a	a	a	b	b	b	a	b	a
BBMR_14I22	b	a	a	b	a	a	b	a	b	b	a	b	a	b	b	b	a	b	b	b	a	b	a	b	a	a	b	a	b	b	a	b	a	a	a	a	b	b	b	b	a	a	a	b	b	b	-	b	-
BBMR_14K01	a	a	b	a	a	b	b	b	a	a	b	b	b	b	b	b	b	b	a	a	a	b	a	b	b	a	a	a	a	a	a	b	a	a	b	a	b	a	a	a	b	a	-	a	a	a	a	a	b
BBMR_14M14	a	a	a	a	a	b	a	b	b	a	b	a	a	a	a	b	a	a	b	a	a	a	b	b	b	a	b	a	a	b	a	b	a	b	a	b	b	a	a	b	a	b	a	b	a	b	-	b	a
BBMR_14N01	b	a	a	b	a	a	b	a	b	b	a	b	a	b	b	b	a	b	b	b	a	b	a	b	a	a	b	a	b	b	a	b	a	a	a	a	b	b	b	b	a	a	a	b	b	b	a	b	a
BBMR_14N09	b	a	a	b	a	a	b	a	b	b	a	b	a	b	b	b	a	b	b	b	a	b	a	b	a	a	b	a	b	b	a	b	a	a	a	a	b	b	b	b	a	a	a	b	b	b	a	b	a
BBMR_15A20	a	a	a	a	a	b	a	b	b	a	b	a	a	a	a	b	a	a	b	a	a	a	b	b	b	a	b	a	a	b	a	b	a	b	a	b	b	a	a	b	a	b	a	b	a	b	b	b	a
BBMR_15B02	b	a	a	b	a	a	b	a	b	b	a	b	a	b	b	b	a	b	b	b	-	b	a	b	a	a	b	a	b	b	a	b	a	a	a	a	b	b	b	b	a	a	a	b	b	b	a	b	a
BBMR_15B03	b	a	a	b	a	a	b	a	b	b	a	b	a	b	b	b	a	b	b	b	a	b	a	b	a	a	b	a	b	b	a	b	a	a	a	a	b	b	b	b	a	a	a	b	b	b	a	b	a
BBMR_15B21	b	a	a	b	a	a	b	a	b	b	a	b	a	b	b	b	a	b	b	b	a	b	a	b	a	a	b	a	b	b	a	b	a	a	a	a	b	b	b	b	-	a	a	b	b	b	a	b	a
BBMR_15E04	b	a	a	b	a	a	b	a	b	b	a	b	a	b	b	b	a	b	b	b	a	b	a	b	a	a	b	a	b	b	a	b	a	a	a	a	b	b	b	b	a	a	a	b	b	b	a	b	a
BBMR_15G01	a	a	a	a	a	b	a	b	b	a	b	a	a	a	a	b	a	a	b	a	a	a	b	b	b	a	b	a	a	b	a	b	a	b	a	b	b	a	a	b	a	b	a	b	a	b	b	b	a
BBMR_15G02	b	a	a	b	a	a	b	a	b	b	a	b	a	b	b	b	a	b	b	b	a	b	a	b	a	a	b	a	b	b	a	b	a	a	a	a	b	b	b	b	a	a	a	b	b	b	a	b	a
BBMR_15H13	b	a	a	b	a	a	b	a	b	b	a	b	a	b	b	b	a	b	b	b	a	b	a	b	a	a	b	a	b	b	a	-	a	a	a	a	b	b	b	b	a	a	a	b	b	b	a	b	a
BBMR_15J16	b	a	a	b	a	a	b	a	b	b	a	b	a	b	b	b	a	b	b	b	a	b	a	b	a	a	b	a	b	b	a	b	a	a	a	a	b	b	b	b	a	a	a	b	b	b	a	b	a
BBMR_15K19	b	a	a	b	a	a	b	a	b	b	a	b	a	b	b	b	a	b	b	b	a	b	a	b	a	a	b	a	b	b	a	b	a	a	a	a	b	b	b	b	a	a	a	b	b	b	a	b	a
BBMR_15L07	a	a	a	a	a	b	a	b	b	a	b	a	a	a	a	b	a	a	b	a	a	a	b	b	b	a	b	a	a	b	a	b	a	b	a	b	b	a	a	b	a	b	a	b	a	b	b	b	a
BBMR_15M02	a	b	b	a	a	b	b	b	a	b	b	a	b	b	a	b	b	a	b	a	a	a	a	b	b	a	a	a	a	a	b	b	a	b	b	a	b	a	b	b	b	-	a	a	a	a	b	a	b
BBMR_15N20	b	a	a	b	a	a	b	a	b	b	a	b	a	b	b	b	a	b	b	b	a	b	a	b	a	a	b	a	b	b	a	b	a	a	a	a	b	b	b	b	a	a	a	b	b	b	a	b	a
BBMR_15O21	a	b	b	a	a	b	b	b	a	b	b	a	b	b	a	b	b	a	b	a	a	a	a	b	b	a	a	a	a	a	b	b	a	b	b	a	b	a	b	b	b	a	a	a	a	a	b	a	b
BBMR_15P06	b	a	a	b	a	a	b	a	b	b	a	b	a	b	b	b	a	b	b	b	a	b	a	b	a	a	b	a	b	b	a	b	a	a	a	a	b	b	b	b	a	a	a	b	b	b	a	b	a
BBMR_16A19	b	a	a	b	a	a	b	a	b	b	a	b	a	b	b	b	a	b	b	b	a	b	a	b	a	a	b	a	b	b	a	b	a	a	a	a	b	b	b	b	a	a	a	b	b	b	a	b	a
BBMR_16B02	a	a	a	a	a	b	a	b	b	a	b	a	a	a	a	b	a	a	b	a	a	a	b	b	b	a	b	a	a	b	-	b	a	b	a	b	b	a	a	b	a	b	a	b	a	b	b	b	a
BBMR_16B08	b	a	a	b	a	a	b	a	b	b	a	b	a	b	b	b	a	b	b	b	a	b	a	b	a	a	b	a	b	b	a	b	a	a	a	a	b	b	b	b	a	a	a	b	b	b	a	b	a
BBMR_16E06**	a	b	a	b	a	a	b	a	a	a	a	a	a	b	a	b	a	a	a	b	b	b	a	a	a	b	a	a	a	a	a	a	a	a	a	a	a	a	a	b	b	a	a	b	a	a	a	b	-
BBMR_16E15	a	b	b	a	b	a	a	a	b	a	b	b	b	a	b	a	b	b	a	a	a	b	a	b	b	a	b	a	a	a	b	a	b	b	b	b	b	a	b	b	b	a	a	b	b	a	a	b	a
BBMR_16E21	b	a	a	b	a	a	b	a	b	b	a	b	a	b	b	b	a	b	b	b	a	b	-	b	a	a	b	a	b	b	a	b	a	a	a	a	b	b	b	b	a	a	a	b	b	b	a	b	a
BBMR_16E23	b	a	a	b	a	a	b	a	b	b	a	b	a	b	b	b	a	b	b	b	a	b	a	b	a	a	b	a	b	b	a	b	a	a	a	a	b	b	b	b	a	a	a	b	b	b	-	b	a
BBMR_16F24	b	b	b	b	b	b	a	b	a	b	a	a	b	a	b	b	a	b	a	a	b	a	a	b	b	b	a	a	b	b	a	b	a	b	a	a	a	b	b	b	a	a	a	b	b	b	b	b	b
BBMR_16G12	b	a	a	b	a	a	b	a	b	b	a	b	a	b	b	b	a	b	b	b	a	b	a	b	a	a	b	a	b	b	a	b	a	a	a	a	b	b	b	b	a	a	a	b	b	b	a	b	a
BBMR_16G14	b	a	a	b	a	a	b	a	b	b	a	b	a	b	b	b	a	b	b	b	a	b	a	b	a	a	b	a	b	b	a	b	a	a	a	a	b	b	b	b	a	a	-	b	b	b	a	b	a
BBMR_16H05	b	a	a	b	a	a	b	a	b	b	a	b	a	b	b	b	a	b	b	b	a	b	a	b	a	a	b	a	b	b	a	b	a	a	a	a	b	b	b	b	a	a	a	b	b	b	a	b	a
BBMR_16I05	a	a	a	a	a	b	a	b	b	a	b	a	a	a	a	b	a	a	b	a	a	a	-	b	b	a	b	a	a	b	a	b	a	b	a	b	b	a	a	b	a	b	a	b	a	b	b	b	a
BBMR_16I10	a	b	b	a	a	b	b	b	a	b	b	a	b	b	a	b	b	a	b	a	a	a	a	b	b	a	a	a	a	a	b	b	a	b	b	a	b	a	b	b	b	a	a	a	a	a	b	a	b
BBMR_16J05	a	a	b	b	a	a	b	a	a	a	b	a	a	a	b	a	a	b	b	b	b	b	a	b	b	a	a	b	b	b	b	a	b	b	a	b	b	b	b	b	a	b	a	a	b	b	a	a	-
BBMR_16L06	a	a	-	a	a	b	a	b	b	a	b	a	a	-	a	b	a	a	b	a	a	a	b	b	b	a	b	a	a	b	a	b	a	b	a	b	b	a	a	b	a	b	a	-	a	b	b	b	a
BBMR_16M06	b	a	a	b	a	a	b	a	b	b	a	b	a	b	b	b	a	b	b	b	a	b	a	b	a	a	b	a	b	b	a	b	a	a	a	a	b	b	b	b	a	a	a	b	b	b	a	b	a
BBMR_16M23	b	b	a	a	b	b	b	a	b	a	b	b	a	a	a	b	a	b	a	b	b	b	a	a	a	a	b	a	a	a	b	a	b	a	b	a	a	a	b	b	a	a	b	a	a	b	b	b	a
BBMR_16N22**	b	a	b	b	b	a	a	b	b	b	a	b	b	b	b	b	b	b	b	a	b	a	b	b	b	b	b	a	b	a	b	b	a	a	a	b	b	b	b	-	a	b	b	b	a	a	b	a	b
BBMR_16O09	b	a	a	b	a	a	b	a	b	b	a	b	a	b	b	b	a	b	b	b	a	b	a	b	a	a	b	a	b	b	a	b	a	a	a	a	b	b	b	b	a	-	a	b	b	b	a	b	a
BBMR_16O24	b	a	a	b	a	a	b	a	b	b	a	b	a	b	b	b	a	b	b	b	a	b	a	b	a	a	b	a	b	b	a	b	a	a	a	a	b	b	b	b	a	a	a	b	b	b	a	b	a
BBMR_16P03	b	a	a	b	a	a	b	a	b	b	a	b	a	b	b	b	a	b	b	b	a	b	a	b	a	a	b	a	b	b	a	b	a	a	a	a	b	b	b	b	a	a	a	b	b	b	a	b	a
BEATMpAG_133	a	a	b	b	a	a	a	b	a	b	b	b	a	a	a	a	b	b	a	a	a	b	b	b	a	a	b	a	b	a	b	b	b	a	b	b	b	b	a	b	b	a	a	b	a	b	a	b	a
BEATMpAG_138	a	b	a	b	a	a	b	a	a	a	b	a	a	a	a	a	a	b	b	b	b	b	a	b	b	b	a	b	b	b	b	a	a	b	a	b	b	b	b	b	a	b	a	a	a	b	a	a	b
BEATMpAG_212	b	a	b	a	b	a	a	b	a	b	a	b	b	b	b	a	b	b	b	a	b	a	b	b	b	b	b	a	b	a	b	b	a	a	a	b	b	b	b	a	a	b	a	b	a	a	b	a	b
BEATMpAG_258	a	b	a	a	b	b	a	a	b	a	b	a	a	b	b	b	b	b	a	b	b	b	a	b	a	a	b	a	b	b	a	b	b	a	b	b	a	a	b	a	b	b	b	a	a	b	b	a	b
BEATMpAG_263	b	a	a	b	b	a	a	a	a	b	b	b	a	b	b	b	a	b	a	a	b	b	a	a	a	b	a	b	a	a	a	b	a	b	b	b	b	a	a	b	a	b	a	b	a	b	b	a	b
BEATMpAG_278	b	b	b	b	b	a	b	a	b	b	a	a	a	b	a	b	b	b	b	a	a	b	a	b	a	a	a	b	b	b	b	a	a	b	b	b	b	b	a	a	b	b	a	a	b	a	a	a	b
BEATMpAG_312	a	b	a	b	a	a	b	a	a	a	b	a	a	a	a	a	a	b	b	b	b	b	a	b	b	b	a	b	b	b	b	a	a	b	a	b	b	b	b	b	a	b	a	a	a	b	a	a	b
BEATMpAG_336	b	a	b	a	b	b	a	a	b	a	a	a	a	b	a	a	b	b	a	b	a	a	a	b	b	a	b	a	b	b	b	b	b	b	b	a	b	b	a	b	b	b	a	b	b	b	b	a	b
BEATMpAG_391	a	b	a	a	a	b	a	b	a	b	b	a	b	b	a	a	a	a	a	b	a	a	b	a	b	b	b	a	a	a	b	a	a	b	a	b	a	b	a	a	b	b	a	b	b	b	b	b	a
BEATMpCG_171****	b	a	b	a	b	a	b	b	a	a	a	b	b	a	a	b	b	b	b	b	b	b	b	b	b	b	b	a	a	a	b	a	b	b	b	a	b	b	b	b	b	b	b	b	b	b	b	b	a
BEATMpCG_205	b	b	b	b	b	a	b	a	b	b	b	a	a	a	b	b	a	b	b	a	b	a	b	b	a	a	a	b	b	a	b	a	b	b	b	a	a	a	a	b	-	b	a	b	b	a	a	a	b
BEATMpCG_214	a	b	b	b	b	a	a	a	b	b	a	a	b	a	b	b	b	a	b	b	b	a	a	b	b	a	b	a	b	a	b	b	a	b	a	b	b	a	b	a	b	a	b	a	a	b	a	b	a
BEATMpCG_273	b	b	b	b	b	a	b	a	a	b	b	a	a	a	a	b	a	a	b	a	b	b	a	a	b	a	a	a	b	a	b	-	-	a	b	a	b	b	b	b	b	a	a	a	b	a	a	b	b
BEATMpCG_313	b	a	a	a	a	a	b	b	a	a	b	b	b	b	a	a	b	b	a	a	a	b	a	a	b	a	a	b	b	b	b	b	b	a	b	b	a	a	a	b	b	a	a	a	b	b	a	a	b
BEATMpCG_465	-	b	b	b	a	a	a	b	b	a	b	a	b	b	b	a	b	b	a	a	b	b	a	b	b	a	a	b	b	a	b	b	a	-	a	b	a	a	a	a	a	b	b	b	b	a	a	b	a
BEATMpCG_607	a	b	a	a	b	b	a	a	b	a	b	a	a	b	a	b	b	b	a	b	b	b	a	b	a	a	b	a	b	b	a	b	b	-	b	b	a	a	a	a	b	b	b	a	-	b	b	a	b
BEATMpCG_642	a	b	a	a	b	b	a	a	b	a	b	a	a	b	b	b	b	b	a	b	b	b	a	b	a	a	b	a	b	b	a	b	b	-	b	b	a	a	a	a	b	b	b	a	-	b	b	a	b
BEATMpCG_82	a	b	b	b	a	a	b	b	b	a	a	a	a	b	b	a	b	b	a	a	a	b	a	a	b	a	a	b	a	a	b	b	a	a	b	b	a	a	b	a	a	b	b	b	b	a	a	b	a
BEATMpCG_86**	a	b	a	b	a	a	b	a	a	a	a	a	a	b	a	b	a	a	a	b	b	b	a	a	a	b	a	a	a	a	a	a	a	a	a	a	a	a	a	b	b	a	a	b	a	a	a	b	a
BEGAMpAC_129	a	b	b	b	a	a	b	b	b	a	a	a	a	b	b	a	a	b	a	b	a	b	a	a	b	a	a	b	a	a	b	b	a	a	b	b	a	a	b	a	a	b	b	b	b	a	a	b	a
BEGAMpAC_134	a	a	a	a	b	b	a	a	b	a	a	a	a	a	b	a	a	b	a	b	a	a	a	b	b	a	b	a	b	b	a	b	b	a	b	b	b	a	b	a	b	b	b	b	a	b	b	a	b
BEGAMpAC_144	a	a	b	a	a	b	b	b	a	a	b	b	b	b	b	b	b	b	a	a	a	b	a	b	b	a	a	a	a	a	a	b	b	a	b	a	b	a	a	a	b	a	b	a	a	a	a	a	b
BEGAMpAC_153	b	a	a	b	a	a	a	a	b	b	a	a	a	b	b	b	b	a	b	b	a	b	a	b	a	a	b	a	b	b	a	b	a	a	a	a	b	b	b	b	a	a	a	b	b	b	a	a	b
BEGAMpAC_208	a	b	a	b	b	a	b	a	b	a	a	a	a	b	a	b	b	b	b	a	a	b	a	b	b	a	a	b	b	b	b	b	b	b	b	b	b	b	a	a	b	b	a	a	b	a	a	b	b
BEGAMpAC_283	b	b	b	a	b	a	a	b	a	b	a	b	b	b	b	a	a	b	b	a	b	a	b	b	b	b	b	a	b	a	b	b	a	a	a	b	b	a	b	a	a	b	a	b	a	a	b	a	b
BEGAMpAC_290	a	b	a	a	b	b	b	a	a	a	b	a	a	a	a	b	b	b	a	b	b	b	a	a	a	a	b	a	b	a	b	a	b	a	b	a	a	a	b	b	a	a	b	a	a	b	b	b	a
BEGAMpAC_324*	b	b	b	b	b	a	b	a	b	b	b	a	a	a	b	b	b	b	b	a	b	a	b	b	a	a	a	b	b	b	b	a	b	b	b	b	a	a	a	b	b	b	a	b	b	a	a	a	b
BEGAMpAC_334	a	b	b	b	b	b	a	b	a	a	a	b	a	b	b	b	b	b	a	b	b	a	a	b	a	b	b	a	a	b	a	a	a	b	b	a	a	a	b	b	a	a	b	b	b	b	b	b	b
BEGAMpAC_343	b	a	b	a	a	a	a	b	a	b	a	b	b	b	b	a	a	b	a	a	b	b	a	b	a	a	a	b	b	b	b	a	a	a	b	a	b	a	b	a	b	b	b	a	a	a	b	a	b
BEGAMpAC_390	a	a	a	a	a	b	a	b	b	a	b	a	a	a	a	b	b	a	b	a	a	a	b	b	b	a	b	a	a	b	a	b	a	b	a	b	b	a	a	b	a	b	a	b	a	b	b	b	a
BEGAMpAC_489	b	b	b	a	b	a	a	b	a	b	a	b	b	b	b	a	a	b	b	a	b	a	b	b	b	b	b	a	b	a	b	b	a	a	a	b	b	a	b	a	a	b	a	b	a	a	b	a	b
BEGAMpAC_556	a	b	a	b	b	a	b	a	b	b	a	b	a	b	a	b	b	a	b	a	a	b	a	a	b	a	b	a	b	b	b	b	b	b	b	b	b	b	a	a	b	b	a	a	b	a	a	b	b
BEGAMpAC_74	b	a	a	a	a	b	a	b	b	a	b	a	b	b	b	a	a	a	a	a	b	a	a	a	a	b	a	b	b	b	a	a	b	b	a	b	b	a	a	b	a	b	a	b	a	b	b	b	a
BEGAMpAG_120	a	b	b	b	a	b	a	a	a	b	b	b	a	a	a	a	b	b	a	a	a	b	b	b	a	a	a	b	a	a	b	a	b	a	b	b	b	b	b	b	a	a	a	b	a	b	a	b	a
BEGAMpAG_127	a	b	a	b	b	a	b	a	b	b	a	b	a	b	a	b	a	a	b	a	a	b	a	a	b	a	b	a	b	b	b	b	b	b	b	b	b	b	a	a	b	b	a	a	b	a	a	b	b
BEGAMpAG_141	a	b	a	a	b	b	a	a	a	a	b	a	a	a	a	b	b	b	a	b	b	b	a	a	a	a	b	a	b	a	b	b	b	a	b	a	a	a	b	a	b	b	b	a	a	b	b	b	a
BEGAMpAG_189	a	b	a	a	a	a	b	b	b	b	b	b	a	a	a	b	b	b	b	a	a	b	b	b	b	a	b	a	a	a	b	b	b	a	b	a	b	a	a	a	b	a	b	a	a	a	b	a	b
BEGAMpAG_194	b	b	b	a	a	b	a	a	a	b	a	a	b	a	a	b	a	a	b	a	a	a	b	b	b	b	b	a	b	a	a	b	b	b	a	a	b	b	b	a	a	a	a	b	a	b	b	b	a
BEGAMpAG_198	b	a	a	b	a	a	b	a	a	a	a	a	b	b	a	b	a	a	b	a	b	b	a	b	b	a	b	a	a	a	b	b	a	b	a	a	a	a	b	b	a	a	b	a	a	a	b	a	b
BEGAMpAG_208	b	a	a	b	a	a	b	a	a	a	b	b	a	b	b	b	b	b	a	a	b	b	a	b	a	b	a	b	a	a	a	a	a	b	b	b	b	a	a	b	a	a	a	b	a	b	b	a	b
BEGAMpAG_241	a	b	a	b	b	a	b	a	b	b	a	b	a	b	a	b	a	a	b	a	a	b	a	a	b	a	b	a	b	b	b	b	b	b	b	a	b	b	a	a	b	b	a	a	b	a	a	b	b
BEGAMpAG_256	a	b	b	a	a	b	b	b	a	b	b	a	b	b	a	b	a	a	b	a	a	a	a	b	b	a	a	a	a	a	b	b	a	b	b	a	b	a	b	b	b	a	a	a	a	a	b	a	b
BEGAMpAG_262	a	a	a	a	a	b	b	a	b	b	b	b	a	a	a	b	a	a	b	a	a	b	a	b	b	b	b	a	a	b	b	b	b	b	a	a	b	b	a	a	b	b	a	b	a	a	a	b	b
BEGAMpAG_483	a	b	a	a	-	b	a	b	b	b	a	a	a	b	a	a	a	a	b	a	b	a	a	a	b	a	b	a	b	a	b	a	b	a	a	b	b	b	b	a	a	b	a	b	b	a	b	b	a
BEGAMpAG_505	b	a	a	b	a	a	a	a	b	b	a	a	a	a	b	a	a	a	b	a	a	a	b	b	b	b	b	a	b	a	b	b	a	a	a	b	b	b	b	a	a	a	b	b	a	a	a	a	b
BEGAMpAG_508	a	b	a	a	b	b	a	b	a	b	a	a	a	b	a	a	b	b	a	a	b	a	a	a	b	a	b	a	b	a	b	a	a	a	a	b	b	b	b	a	a	b	a	b	b	a	b	b	a
BEGAMpAG_74	b	b	b	b	a	b	a	a	a	b	a	a	b	a	b	b	b	b	a	a	b	a	a	b	b	b	a	a	b	b	a	b	a	b	a	a	a	b	b	b	a	a	a	b	b	b	b	b	b
BEGAMpCA_214	b	a	b	a	a	a	a	b	a	b	a	b	b	b	b	a	b	b	a	a	b	b	a	b	a	a	a	b	b	b	b	a	a	a	a	b	b	a	b	a	b	b	b	a	a	a	b	a	a
BEGAMpCA_243	a	a	b	b	a	b	b	a	a	a	b	a	a	b	b	b	b	b	a	a	b	b	b	b	b	b	a	b	a	a	a	a	a	b	b	a	b	a	b	b	a	a	a	b	a	b	a	b	b
BEGAMpCA_254	b	b	a	a	a	b	b	b	b	a	b	a	a	a	a	a	b	a	a	b	a	a	a	b	b	b	b	b	a	b	a	b	a	b	a	b	a	b	a	b	b	b	a	b	b	a	a	a	a
BEGAMpCA_278	b	a	a	b	a	a	a	a	a	b	b	b	a	b	b	b	a	b	a	a	b	b	a	-	b	b	-	b	a	a	a	b	a	b	b	b	b	a	a	b	a	a	a	b	a	b	b	a	b
BEGAMpCA_288*	a	a	a	b	a	b	b	a	b	b	b	a	a	b	b	b	b	b	a	a	b	b	b	b	b	b	b	a	a	b	a	a	a	b	b	a	b	a	b	b	a	b	a	b	a	b	b	b	b
BEGAMpCA_292**	b	b	b	b	b	b	b	a	b	b	b	a	a	a	b	b	a	b	b	a	b	a	b	b	a	a	a	b	b	b	b	a	b	b	b	b	b	b	a	a	b	b	a	a	b	a	a	a	b
BEGAMpCA_326	b	b	b	a	b	a	a	b	a	b	a	b	b	b	b	a	b	b	b	a	b	a	b	b	b	b	b	a	b	a	b	b	a	a	a	b	b	a	b	a	a	b	a	b	a	a	b	a	b
BEGAMpCA_342	b	a	b	a	a	a	a	b	a	b	a	b	b	b	b	a	b	b	a	a	b	b	a	b	a	a	a	b	b	b	b	a	a	a	b	b	b	a	b	a	b	b	b	a	a	a	b	a	a
BEGAMpCA_62	a	b	a	a	b	b	a	b	a	b	a	a	b	b	a	a	a	b	a	b	a	a	a	a	b	a	b	a	b	a	b	a	a	a	a	b	b	b	b	a	a	b	a	b	b	a	b	b	a
BEGAMpCA_85******	a	a	b	b	a	b	b	b	b	a	b	b	a	b	b	b	b	b	a	a	b	b	-	b	b	b	b	b	a	b	b	a	a	b	b	b	b	a	a	b	a	a	b	b	b	b	b	b	b
BEGAMpCA_93	a	b	a	a	a	b	b	b	b	b	b	b	a	a	a	b	a	b	b	a	a	b	b	b	b	a	b	a	a	a	b	b	b	a	b	a	b	a	a	a	b	a	b	a	a	a	b	a	b
BEGAMpCC_125	a	a	b	a	a	b	b	b	a	a	b	b	a	b	b	b	b	b	a	a	a	b	a	b	b	a	a	a	a	b	a	b	b	a	b	a	b	a	a	a	b	a	b	b	a	a	a	a	b
BEGAMpCC_208*	-	a	b	b	a	b	a	b	a	a	b	b	a	b	b	b	a	b	b	a	b	a	a	b	a	b	b	a	a	b	b	a	b	a	b	b	a	a	b	b	b	a	b	a	b	b	b	b	b
BEGAMpCC_253	a	a	a	b	a	a	b	a	a	a	b	a	a	b	b	b	a	b	a	a	b	b	b	b	a	b	a	b	a	a	a	a	a	b	b	a	b	a	a	b	a	a	a	b	-	b	b	b	b
BEGAMpCC_390	b	a	b	a	b	b	b	b	a	a	b	a	b	b	b	a	b	b	a	b	a	b	a	b	a	a	b	a	a	a	a	b	a	a	a	b	b	a	a	b	a	b	a	b	-	b	b	b	a
BEGAMpCC_426	b	b	b	a	b	b	b	a	a	b	a	b	b	b	b	b	a	b	a	a	b	a	b	a	a	a	a	a	a	a	b	a	a	a	a	b	b	a	b	a	a	a	b	b	-	b	a	a	b
BEGAMpCC_446******	b	b	b	b	b	a	b	a	b	b	b	a	a	a	b	b	a	b	b	b	b	b	b	b	b	b	a	b	b	b	b	a	b	b	b	b	b	b	b	b	b	b	a	b	b	b	a	a	b
BEGAMpCC_474	b	b	b	b	b	a	b	a	b	b	a	a	a	b	b	b	a	b	a	a	b	a	b	b	a	a	a	b	b	b	b	a	b	b	b	b	b	b	a	a	b	b	a	a	b	a	a	a	b
BEGAMpCC_59******	a	b	b	a	a	b	b	b	b	b	b	b	b	b	a	b	b	a	b	a	a	b	a	b	b	b	b	a	a	b	b	b	b	b	b	a	b	b	b	b	b	b	a	b	-	a	b	b	b
BEGAMpCC_68	b	a	a	b	b	a	a	a	a	b	b	b	a	b	b	b	a	b	a	a	b	b	a	a	a	b	a	b	a	a	a	b	a	b	b	b	b	a	a	b	a	a	a	b	a	b	b	a	b
BEGAMpCC_71	a	b	b	a	a	b	b	b	a	a	b	b	b	b	b	b	b	b	a	a	a	b	a	b	b	a	a	a	a	a	a	b	a	a	b	a	b	a	a	a	b	a	b	a	a	a	a	a	b
BEGAMpCG_143	b	a	a	a	a	b	a	b	b	a	b	a	b	b	b	a	b	a	a	a	b	a	a	a	a	b	a	b	b	b	a	a	b	b	a	b	b	a	a	b	b	b	a	b	a	b	b	b	a
BEGAMpCG_160	b	a	a	a	a	b	a	b	b	a	b	a	b	b	b	a	b	a	a	a	a	a	a	a	a	b	a	b	b	b	a	a	b	b	a	b	b	a	a	b	a	b	a	b	a	b	b	b	a
BEGAMpCG_162	b	b	b	a	b	a	a	b	a	b	a	b	b	b	b	a	b	b	b	a	b	a	b	b	b	b	b	a	b	a	b	b	a	a	a	b	b	a	b	a	a	b	a	b	a	a	a	a	b
BEGAMpCG_206	b	b	a	a	a	b	b	b	b	a	b	a	a	a	a	a	b	a	a	b	a	a	a	b	b	b	b	b	a	b	a	b	a	b	a	b	a	b	a	b	b	b	a	b	b	a	a	a	a
BEGAMpCG_213	a	a	a	a	b	b	b	b	a	b	a	a	a	b	b	b	a	b	b	a	a	a	b	b	a	a	a	b	b	a	a	b	a	b	b	a	b	a	a	a	a	b	b	b	a	b	b	b	a
BEGAMpCG_308	a	a	b	b	a	a	a	b	a	a	b	a	-	a	b	a	a	b	b	b	b	b	a	b	b	a	a	b	b	b	b	a	b	b	a	b	b	b	b	b	a	b	a	a	b	b	a	a	b
BEGAMpCG_95	b	a	a	a	a	a	a	b	b	a	b	a	a	b	b	b	b	a	b	a	a	b	a	b	b	a	a	b	a	a	a	a	a	a	a	a	b	b	a	b	a	b	a	a	b	b	a	b	b
BEGCMpCA_120	a	a	b	b	a	b	b	a	a	b	b	a	a	b	b	b	b	b	a	a	b	b	b	b	a	b	a	a	a	a	a	a	a	b	b	a	b	a	b	b	b	b	a	a	a	b	b	b	b
BEGCMpCA_156**	a	b	b	b	b	b	-	b	a	a	a	b	a	b	b	b	b	b	a	b	b	-	-	b	a	b	b	-	a	b	-	a	-	b	b	a	a	a	b	b	a	a	b	b	b	b	b	b	b
BEGCMpCA_173	a	a	b	b	a	a	a	b	a	a	b	a	a	b	b	a	b	b	b	b	b	b	a	b	b	a	a	b	a	b	b	a	b	b	a	b	b	b	b	b	a	b	a	a	b	b	a	a	b
BEGCMpCA_238	a	b	a	b	b	a	a	a	b	a	a	a	b	b	b	b	a	a	b	b	b	b	a	b	b	a	b	a	b	b	b	b	a	b	a	b	a	a	b	b	a	a	a	a	b	b	b	b	a
BEGCMpCA_254	b	a	b	a	b	a	a	b	a	b	a	b	b	b	b	a	b	b	b	a	b	a	b	b	b	b	b	a	b	a	b	b	a	a	a	b	b	b	b	a	a	b	a	b	a	a	b	a	b
BEGCMpCA_82	a	b	a	a	a	a	b	b	a	a	b	a	b	a	b	a	b	a	b	a	a	b	a	b	b	a	a	b	b	b	b	b	b	a	a	b	b	a	b	b	b	a	a	a	a	b	a	a	b
BEGGMpAT_112	a	a	a	a	b	b	b	b	a	b	a	a	a	a	b	b	a	b	b	a	a	a	b	b	a	a	a	b	b	a	a	b	a	b	b	a	b	a	a	a	b	b	b	b	a	b	b	b	a
BEGGMpAT_142	a	a	a	b	a	b	a	b	b	b	b	a	a	a	b	b	b	b	a	a	b	b	b	b	a	b	b	a	a	b	a	b	a	b	b	a	b	a	b	b	a	b	a	b	a	b	b	b	b
BEGGMpAT_162	a	b	a	a	a	a	a	a	b	a	a	a	b	b	b	b	a	a	b	b	b	b	a	b	b	a	b	b	b	b	b	b	a	b	a	b	a	a	b	b	a	a	a	a	b	a	b	a	b
BEGGMpAT_174	a	b	a	a	b	a	a	a	b	a	a	a	b	b	b	b	a	a	b	b	b	b	a	b	b	a	b	a	b	b	b	b	a	b	a	b	a	a	b	b	a	a	a	a	b	b	b	b	a
BEGGMpAT_204*	a	b	b	a	a	a	a	a	b	b	a	a	b	a	b	a	b	b	a	-	a	a	b	a	b	b	b	a	b	a	b	a	a	a	a	a	a	a	b	b	a	a	a	a	a	a	b	a	b
BEGGMpAT_209	b	a	b	b	a	a	a	b	b	b	a	a	b	a	b	a	b	a	b	a	b	a	b	b	b	b	b	a	b	a	b	b	a	a	a	b	b	b	b	a	a	a	b	b	a	a	b	a	b
BEGGMpAT_242*******	b	b	a	b	b	a	b	b	b	b	b	b	b	b	a	b	a	b	b	b	b	b	b	b	b	b	a	b	a	b	a	b	-	a	a	b	b	b	b	b	b	b	a	a	b	b	b	b	b
BEGGMpAT_288	a	a	b	b	a	b	a	a	a	a	b	b	a	b	-	b	b	b	a	a	a	a	b	a	b	a	a	a	a	b	b	a	b	a	a	b	a	a	a	a	a	a	b	a	b	b	b	a	a
BEGGMpAT_367**	b	b	a	a	a	a	b	a	a	a	a	a	a	b	a	b	a	a	a	b	b	b	a	a	a	b	a	a	a	a	a	a	a	a	a	a	a	a	a	a	b	a	b	a	a	a	a	b	a
BEGGMpAT_398******	b	b	b	a	b	b	b	b	b	a	b	a	a	b	a	a	b	b	a	b	a	a	a	b	b	b	b	b	b	b	b	b	b	b	b	b	b	b	a	b	b	b	a	b	b	b	b	a	b
BEGGMpAT_401	b	b	b	b	b	a	b	a	b	b	a	a	a	b	b	b	a	b	b	a	b	a	b	b	a	a	a	b	b	b	b	a	b	b	b	b	b	b	a	a	b	b	a	a	b	a	a	a	b
BEGGMpAT_439*	a	b	a	b	b	a	b	a	b	a	b	b	b	b	b	b	a	b	b	b	b	b	a	b	b	a	b	a	b	a	b	b	a	b	a	b	b	b	b	b	a	b	a	a	a	a	a	a	b
BEGGMpAT_554******	a	a	b	b	a	b	b	b	b	a	b	b	a	b	b	b	b	b	b	b	b	b	a	b	b	b	a	b	b	b	b	b	b	b	b	b	b	b	b	b	b	b	b	b	a	b	a	a	b
BEGGMpAT_577	a	b	a	a	b	b	a	a	b	a	b	a	a	b	b	b	b	b	a	b	b	b	a	b	a	a	b	a	b	b	a	b	b	a	b	b	a	a	b	a	b	b	b	a	a	b	b	a	b
BEGGMpCG_103	a	b	a	a	b	b	a	b	a	b	b	a	b	b	a	a	a	b	a	b	a	a	a	a	b	a	b	a	b	a	b	a	a	b	a	b	b	b	b	a	a	b	a	b	b	a	b	b	a
BEGGMpCG_147	a	b	a	b	b	a	a	a	b	a	a	a	b	b	b	b	a	a	b	b	b	b	a	b	b	a	b	a	b	b	b	b	a	b	a	b	a	a	b	b	a	a	a	a	b	b	b	b	a
BEGGMpCG_217	a	b	a	-	a	a	b	b	b	b	b	b	a	a	a	b	a	b	b	a	a	b	b	b	b	a	b	a	a	a	b	b	b	a	b	a	b	a	a	a	b	a	b	a	a	a	b	a	b
BEGGMpCG_248	a	a	a	a	a	b	a	b	b	a	b	a	a	b	b	a	a	b	a	a	a	a	a	b	a	a	a	b	b	b	a	b	a	b	b	a	b	a	b	a	b	b	b	b	b	b	b	b	a
BEGGMpCG_307	a	a	a	b	b	a	a	b	a	a	b	b	a	b	b	a	b	b	a	a	b	a	b	b	a	a	a	b	a	b	b	b	b	b	a	b	a	b	a	b	a	a	a	a	b	b	a	a	b
BEGGMpCG_421	b	a	a	a	b	a	a	a	b	a	a	b	b	a	a	b	a	a	b	b	a	b	a	a	b	b	a	a	a	b	a	a	b	b	a	a	a	b	a	b	a	a	b	a	a	b	b	b	a
BEGGMpCG_430	b	a	a	b	a	a	b	a	a	a	b	a	b	b	a	b	a	a	b	a	b	b	a	b	b	a	b	a	a	a	b	b	a	b	a	a	a	a	a	b	a	-	b	a	a	a	b	-	a
BEGGMpCG_469	a	b	b	b	b	a	b	a	a	a	b	b	b	a	b	a	b	b	a	a	a	b	a	b	a	a	b	a	a	a	b	a	a	b	b	b	b	a	b	b	b	a	a	b	a	a	a	b	a
BEGGMpCG_700	a	b	b	a	a	-	b	b	a	a	b	b	b	b	b	b	b	b	a	a	a	b	a	b	b	a	a	a	a	a	a	b	a	a	b	a	b	a	a	a	b	-	b	a	a	a	a	a	b
BEGGMpCG_81	a	a	a	a	b	b	a	a	b	a	a	a	a	a	b	b	b	b	a	b	a	a	a	b	b	a	b	a	b	b	a	b	b	a	b	b	b	a	a	a	b	b	b	b	a	b	b	-	b
BEGGMpCG_99	b	a	a	a	a	a	b	b	a	a	b	b	b	b	a	a	b	b	a	a	a	b	a	a	b	a	a	b	b	b	b	b	b	a	b	b	a	a	b	b	b	a	a	a	b	b	a	a	b
BEGTMpAT_128	a	a	b	a	a	b	b	b	a	a	b	b	b	b	b	b	b	b	a	a	a	b	a	b	b	a	a	a	a	a	a	b	b	a	b	a	b	a	a	a	b	a	b	b	a	a	a	a	b
BEGTMpAT_162**	b	b	a	a	a	a	b	a	a	a	a	a	a	b	a	b	a	a	a	b	b	b	a	a	a	b	a	a	a	a	a	a	a	a	a	a	a	a	a	a	b	a	b	a	a	a	a	b	a
BEGTMpAT_217	b	a	a	a	a	a	b	a	a	a	a	a	b	b	b	b	a	a	b	a	b	b	a	b	b	a	b	a	a	b	b	b	a	b	a	a	a	a	b	b	a	a	a	a	b	a	b	a	b
BEGTMpAT_240	a	a	a	a	a	b	a	a	b	a	b	a	a	b	b	b	a	a	b	a	a	b	a	a	b	b	a	b	a	a	a	a	a	a	a	a	b	b	a	a	a	b	b	a	b	a	a	b	a
BEGTMpAT_295	b	b	b	a	b	b	b	b	a	a	a	b	b	a	a	a	b	a	b	b	a	a	b	b	b	b	a	b	b	a	b	b	a	b	b	b	b	a	b	b	b	a	a	b	a	a	b	a	b
BEGTMpAT_318	a	a	b	a	a	b	b	b	a	a	b	b	b	b	b	b	b	b	a	a	a	b	a	b	b	a	a	a	a	a	a	b	b	a	b	a	b	a	a	a	b	a	b	b	a	a	a	a	b
BEGTMpAT_377	b	b	b	b	b	a	b	b	b	b	b	a	a	a	b	b	a	b	b	a	b	a	b	b	a	a	a	b	b	a	b	-	b	b	b	a	a	a	a	b	b	b	a	b	b	a	a	a	b
BEGTMpAT_450	a	b	b	a	a	b	b	b	a	b	b	a	b	b	a	b	b	a	b	a	a	a	a	b	b	a	a	a	a	a	b	b	a	b	b	a	b	a	b	b	b	a	a	a	a	a	b	a	b
BEGTMpAT_468	a	a	a	b	a	a	b	a	a	a	b	a	a	a	a	b	a	b	b	b	b	b	a	b	b	a	b	a	b	a	b	b	a	b	a	b	b	b	b	b	a	b	a	a	a	a	a	a	b
BEGTMpAT_637	a	a	a	a	b	b	b	b	a	b	a	a	a	a	b	b	a	b	b	a	a	a	b	b	-	a	a	b	b	a	a	b	b	b	b	a	b	a	a	a	b	b	b	b	a	b	b	b	a
BEGTMpAT_651	a	b	b	a	b	a	a	a	b	a	b	b	b	a	b	a	b	b	a	a	a	b	a	b	b	a	b	a	a	a	b	a	b	b	b	b	b	a	a	b	b	a	a	b	b	a	a	b	a
BEGTMpAT_745	a	a	b	b	a	a	b	a	b	a	b	a	a	a	b	a	a	b	b	b	b	b	a	b	b	b	a	b	b	b	b	a	a	b	a	b	b	b	b	b	a	b	a	a	a	b	a	a	b
BEGTMpAT_84	b	b	b	a	b	b	b	b	a	a	b	a	b	a	a	a	b	a	b	b	a	a	b	b	b	b	a	b	b	a	b	b	a	b	b	b	b	a	b	b	b	a	a	b	b	a	a	a	b
BEGTMpAT_89	a	a	b	a	a	b	b	b	b	b	b	b	a	a	a	b	a	b	b	a	a	b	a	b	b	a	a	a	a	b	a	b	b	a	b	a	b	a	a	a	b	a	b	a	a	a	a	a	b
BHMR_04D05*	a	a	a	a	a	b	a	a	b	a	b	a	a	b	b	b	a	a	b	a	a	b	a	a	b	b	a	b	a	a	a	a	a	a	a	a	b	b	a	a	a	b	b	a	b	a	a	b	a
BHMR_06J05**	b	b	b	a	a	a	a	a	b	b	a	a	b	a	b	a	b	b	a	a	a	b	a	a	b	b	b	a	b	a	b	a	a	a	a	a	a	a	b	b	a	a	a	a	a	a	b	a	b
BHMR_08K20	b	b	a	a	a	a	a	a	a	a	b	b	b	a	a	a	a	b	a	b	a	a	a	a	b	b	a	b	b	a	b	b	a	b	b	b	b	a	b	b	b	a	a	a	a	a	b	a	b
BHMR_09C09	b	a	b	a	a	a	a	b	b	b	a	a	b	b	b	a	b	a	b	a	b	a	b	b	b	b	b	a	b	a	b	b	a	a	a	b	b	b	b	a	a	a	b	b	a	a	b	a	b
BHMR_10D06	b	a	b	a	a	a	a	b	a	b	a	b	b	b	b	a	b	b	a	a	b	-	a	b	a	a	a	b	b	b	b	a	a	a	b	a	-	a	b	a	b	b	a	a	a	a	b	a	b
BHMR_10G08****	b	b	b	a	b	b	b	b	b	a	b	a	a	b	-	a	b	b	a	b	a	a	a	-	b	-	b	a	b	b	b	b	b	b	b	-	b	b	a	b	b	b	a	b	b	b	b	a	b
BHMR_10I23	a	a	b	b	a	a	b	a	a	a	b	a	a	a	b	a	a	b	b	b	b	b	a	b	b	a	a	b	b	b	b	a	b	b	a	b	b	b	b	b	a	b	a	a	b	b	a	a	b
BHMR_10K02	b	b	b	a	b	a	a	b	a	b	a	b	b	b	b	a	b	b	b	a	b	a	b	b	b	b	-	a	b	a	b	b	a	a	a	b	b	a	b	a	a	b	a	b	a	a	-	a	b
BHMR_10L23	a	a	a	a	a	b	a	b	b	a	b	a	a	-	a	b	a	a	b	a	a	a	b	b	b	a	b	a	a	b	a	b	a	b	a	b	b	a	a	b	a	b	a	b	a	b	b	b	a
BHMR_11J10	b	a	b	a	a	a	a	b	a	b	a	b	b	b	b	a	b	b	a	a	b	b	a	b	a	a	a	b	b	b	b	a	a	a	b	a	a	a	b	a	b	b	a	a	a	a	b	a	b
BHMR_11K07	b	b	a	a	b	b	b	a	b	a	b	a	a	a	a	b	a	b	a	b	b	b	a	a	a	a	b	a	a	a	b	a	b	a	b	a	a	a	b	b	a	a	-	a	a	b	b	b	a
BHMR_11O04	a	a	b	b	a	a	a	b	a	-	b	b	a	a	a	a	b	b	a	a	a	b	b	b	a	a	b	a	b	a	b	b	b	a	b	b	b	b	a	b	b	a	a	b	a	b	a	b	a
BHMR_12E11	a	a	b	b	a	a	b	a	b	a	b	a	a	a	b	a	a	b	b	b	b	b	a	b	b	b	a	b	b	b	b	a	a	b	a	b	b	b	b	b	a	b	a	a	a	b	a	a	b
BHMR_12J02	a	b	a	b	a	a	b	a	a	a	b	a	a	a	a	a	a	b	b	b	b	b	a	b	b	b	a	b	b	a	b	a	a	b	a	b	b	b	b	b	a	b	a	a	a	b	a	a	b
BHMR_12M11	a	a	a	a	a	b	a	b	b	a	b	a	a	a	a	b	a	a	b	a	a	a	b	b	b	a	b	a	a	b	a	b	a	b	a	b	b	a	a	b	a	b	a	b	a	b	b	b	a
BHMR_13F01	b	a	a	a	a	b	b	a	a	b	a	b	b	a	a	a	b	b	a	b	a	b	a	a	a	a	a	b	b	b	b	a	b	b	b	a	b	b	b	b	b	a	b	a	a	a	a	a	a
BHMR_13H01	a	b	b	a	b	a	a	a	b	a	b	a	b	b	b	a	-	a	a	a	a	b	a	a	b	a	-	a	b	a	b	a	b	b	a	b	b	a	b	-	b	a	a	a	b	a	b	b	a
BHMR_14C03	a	a	b	b	a	a	a	b	a	a	b	a	a	b	a	b	b	a	b	a	a	a	b	b	b	a	b	a	a	b	b	a	b	a	a	b	-	b	a	a	-	a	b	a	a	b	b	b	a
BHMR_14M01**	a	b	a	a	a	a	b	a	a	a	a	a	a	b	a	b	a	a	a	b	b	b	a	a	a	b	a	a	a	a	a	a	a	a	a	a	a	a	a	a	b	a	b	b	a	a	a	b	a
BHMR_15D22	a	a	a	a	a	b	a	b	b	a	-	a	a	a	a	b	a	a	b	a	a	a	b	b	b	a	b	a	-	b	-	b	a	b	a	b	b	a	a	b	a	b	a	b	a	b	b	b	a
BHMR_15N17	b	a	b	b	a	a	-	b	b	b	a	a	b	-	b	-	b	a	b	a	b	a	b	b	b	b	b	a	b	a	b	b	a	a	a	b	b	b	b	a	a	a	b	b	a	a	b	a	b
BHMR_15O10	a	a	b	b	a	a	b	a	b	a	b	a	a	a	b	-	a	b	b	b	b	b	a	b	b	b	a	b	b	b	b	a	a	b	a	b	b	b	b	b	a	b	a	a	a	b	a	a	b
BHMR_16H01	a	a	a	a	a	b	a	b	b	a	b	a	a	a	a	b	a	a	b	a	a	a	b	b	b	a	-	a	-	b	a	b	a	b	a	b	b	a	a	b	a	b	a	b	a	b	b	b	a
BHMR_16L07	a	a	b	b	a	b	b	a	a	b	b	a	a	b	b	b	b	b	a	a	b	b	b	b	b	b	a	a	a	a	a	a	b	b	b	a	b	a	b	a	b	b	a	a	a	b	a	b	b
caa-0002	a	b	a	b	b	a	b	a	b	b	a	b	a	b	a	b	a	a	b	a	a	b	a	a	b	a	b	a	b	b	b	b	b	b	b	-	b	b	a	a	b	b	a	a	b	a	a	b	b
CABMR_01A17	b	a	a	a	b	a	a	a	b	a	a	b	a	a	a	b	a	b	b	b	b	b	a	a	b	b	a	a	a	a	b	a	b	b	a	a	a	b	a	b	a	a	b	a	a	b	b	b	a
CABMR_01B03	a	b	a	a	b	b	a	b	a	b	a	a	a	b	a	a	b	b	a	a	b	a	a	a	b	a	b	a	b	a	b	a	a	a	a	b	b	b	b	a	a	b	a	b	b	a	b	b	a
CABMR_01C12	a	a	a	a	a	a	a	b	a	b	a	a	b	a	b	a	b	b	b	b	b	b	b	a	b	b	b	b	b	b	a	a	a	b	a	b	b	-	b	-	b	b	a	b	a	b	b	a	a
CABMR_01C24	a	a	b	a	a	a	a	b	a	b	a	b	b	b	b	b	b	a	a	a	a	a	a	a	a	b	a	a	a	a	a	b	b	a	a	b	a	b	a	a	b	a	a	b	a	b	b	a	a
CABMR_01E01	a	a	b	b	a	a	b	a	a	a	b	a	a	b	b	b	b	b	a	a	b	b	b	b	a	b	a	b	a	a	a	a	a	b	b	a	b	a	b	b	a	a	a	b	a	b	a	b	b
CABMR_01E02	b	a	b	b	b	a	a	b	a	a	b	a	b	b	a	b	b	a	a	a	a	a	a	a	b	b	a	a	a	a	a	a	b	a	b	a	a	a	b	a	b	a	a	a	b	b	b	a	b
CABMR_01E03*	a	b	a	b	a	a	b	a	a	a	a	a	a	b	a	b	a	b	a	b	b	b	a	a	a	b	a	a	a	a	a	a	a	a	a	b	a	a	a	b	b	a	a	b	a	a	a	b	a
CABMR_01K07	a	a	a	b	a	a	b	b	a	b	a	a	b	b	a	a	b	a	b	b	b	a	b	b	b	b	b	a	a	b	a	a	b	b	b	b	a	a	b	b	a	a	a	a	b	b	a	a	b
CABMR_01K22	a	a	a	a	b	b	a	a	b	a	b	a	a	a	b	b	b	b	a	b	b	b	a	b	a	a	b	a	b	b	a	b	b	a	b	b	a	a	b	a	b	b	b	a	a	b	b	a	b
CABMR_01L15	a	b	b	b	b	b	a	b	a	b	a	b	a	b	b	b	a	b	a	b	b	a	a	b	a	b	a	a	a	b	a	b	-	b	b	a	a	a	b	b	a	a	-	b	b	b	b	b	b
CABMR_01M07	a	a	b	a	a	a	a	b	a	b	a	b	b	b	b	b	b	a	a	a	a	a	a	a	a	b	a	a	a	a	a	b	b	a	a	b	a	b	a	a	b	a	a	b	a	b	b	a	a
CABMR_01N02	b	a	b	a	a	a	a	b	a	b	a	b	b	b	b	a	b	b	a	a	b	b	a	b	a	a	a	b	b	b	b	a	a	a	b	a	b	a	b	a	b	b	a	a	a	a	b	a	b
CABMR_01O17	b	a	b	a	a	a	a	b	a	b	a	b	b	b	b	a	b	b	a	a	b	b	a	b	a	a	a	b	b	b	b	a	a	a	b	a	a	a	b	a	b	b	a	a	a	a	b	a	b
CABMR_01O19	a	b	a	a	a	a	b	b	a	a	b	a	b	a	b	a	b	a	b	a	a	b	b	b	b	a	a	b	b	b	a	a	b	a	a	b	b	a	b	a	b	a	b	a	a	b	a	a	b
CABMR_01O20*	a	b	a	b	a	a	b	a	a	a	a	a	a	b	a	b	a	b	a	b	b	b	a	a	a	b	a	a	a	a	a	a	a	a	a	b	a	a	a	b	b	a	a	b	a	a	a	b	a
CABMR_02A02	b	a	a	a	b	a	b	a	a	a	a	b	a	a	a	b	a	b	b	b	b	b	a	a	b	b	b	a	a	a	b	a	b	b	a	a	a	b	a	b	a	a	b	a	a	b	b	b	a
CABMR_02D17	a	b	a	b	b	a	a	a	b	a	a	a	b	b	b	b	a	a	b	b	b	b	a	b	b	a	b	a	b	b	b	b	a	-	a	-	a	a	b	b	a	a	a	a	b	b	b	b	a
CABMR_02D21	a	a	b	a	a	a	a	b	a	b	a	b	b	b	b	b	b	a	a	a	a	a	a	a	a	b	a	a	a	a	a	b	b	a	a	b	a	b	a	a	b	a	a	b	a	b	b	a	a
CABMR_02F10	a	a	b	a	a	a	a	b	a	b	a	b	b	b	b	b	b	a	a	a	a	a	a	a	a	b	a	a	a	a	a	b	b	a	a	b	a	b	a	a	b	a	a	b	a	b	b	a	a
CABMR_02F15	a	a	b	b	a	a	b	a	b	a	b	-	a	a	b	a	a	b	b	b	b	b	a	b	b	b	a	b	b	b	b	a	a	b	a	b	b	b	b	b	a	b	a	a	a	b	a	a	b
CABMR_02J08	a	b	a	a	b	b	a	b	a	b	a	a	a	b	a	a	b	b	a	a	b	a	a	a	b	a	b	a	b	a	b	a	a	a	a	b	b	b	b	a	a	b	a	b	b	a	b	b	a
CABMR_02P02	a	a	a	a	b	b	b	b	a	a	a	a	b	b	b	b	b	b	a	b	b	b	a	b	a	a	b	a	b	b	b	b	b	a	a	a	b	a	a	b	a	a	a	b	a	a	b	b	a
CABMR_03A14*	a	a	b	a	a	b	b	b	a	a	b	a	a	a	a	b	a	b	a	a	a	b	a	b	b	a	a	a	a	b	a	b	b	a	b	a	b	a	a	a	b	a	b	a	a	a	a	a	b
CABMR_03B13	b	b	b	a	a	b	a	a	a	b	a	a	b	a	a	b	a	a	b	a	a	a	b	b	b	b	b	a	b	a	a	b	b	b	a	a	b	b	b	b	a	a	a	b	a	b	b	b	a
CABMR_03C01	b	a	a	a	b	a	b	a	b	a	a	b	a	a	a	b	a	b	b	b	b	b	a	a	b	b	b	a	a	a	b	a	b	b	a	a	a	b	a	b	a	a	b	a	a	b	b	b	a
CABMR_03C15	b	a	a	a	b	a	a	a	b	a	a	b	a	a	a	b	a	b	b	b	b	b	a	a	b	b	a	a	a	a	b	a	b	b	a	a	a	b	a	b	a	a	b	a	a	b	b	b	a
CABMR_03C23	a	b	a	a	b	b	a	b	a	b	a	a	a	b	a	a	b	b	a	a	b	a	a	a	b	a	b	a	b	a	b	a	a	a	a	b	b	b	b	a	a	b	a	b	b	a	b	b	a
CABMR_03E17	b	a	a	a	a	b	b	b	a	b	b	b	a	a	a	b	a	b	a	a	a	b	a	b	b	b	b	a	a	b	b	b	b	b	a	a	b	b	a	b	b	-	a	b	a	a	a	a	b
CABMR_03F07	a	b	b	a	a	b	a	b	a	b	b	a	b	b	a	a	a	a	a	b	a	a	b	a	b	b	b	a	a	a	b	a	a	b	a	b	a	b	b	a	b	b	a	b	b	b	b	b	a
CABMR_03H14	b	b	b	a	a	b	a	a	a	b	a	a	b	a	b	b	a	b	a	a	b	a	a	b	b	b	a	a	b	b	a	b	b	b	a	a	b	b	b	b	a	a	a	b	b	b	b	b	b
CABMR_03I08	a	b	b	b	b	a	a	a	b	b	a	a	b	a	b	b	b	a	b	b	b	a	a	b	b	a	b	a	b	a	b	b	a	b	a	b	b	a	b	a	b	a	b	a	a	b	a	b	a
CABMR_03I13**	b	b	a	a	a	a	b	a	a	a	a	a	a	b	a	b	a	b	a	b	b	b	a	a	a	b	a	a	a	a	a	a	a	a	a	b	a	a	a	a	b	a	b	a	a	a	a	b	a
CABMR_03J15	b	b	b	a	b	b	b	b	a	a	b	a	b	a	a	a	b	a	b	b	a	a	b	b	b	b	a	b	b	a	b	b	a	b	b	b	b	a	b	b	b	a	a	b	a	a	b	a	b
CABMR_03J20*	a	b	a	b	a	a	b	a	a	a	a	a	a	b	a	b	a	b	a	b	b	b	a	a	a	b	a	a	a	a	a	a	a	a	a	b	a	a	a	b	b	a	a	b	a	a	a	b	a
CABMR_03M18	a	a	b	b	a	a	a	b	a	b	b	b	a	a	a	a	b	b	a	a	a	b	b	b	a	a	b	a	b	a	b	b	b	a	b	b	b	b	a	b	b	a	a	b	a	b	a	b	a
CABMR_03O06*	a	a	b	a	a	b	b	b	a	a	b	a	a	a	a	b	a	b	a	a	a	b	a	b	b	a	a	a	a	b	a	b	b	a	b	a	b	a	a	a	b	a	b	a	a	-	a	a	b
CABMR_03P12	a	b	a	a	a	a	b	b	b	b	b	a	a	a	a	b	a	b	b	a	a	b	b	b	b	a	b	a	a	a	b	b	b	a	b	a	b	a	a	a	-	a	b	a	a	a	b	a	b
CABMR_04D15	b	a	a	a	a	b	b	b	a	a	b	b	a	a	a	b	a	b	a	a	a	b	a	b	b	b	b	a	a	b	b	b	b	b	a	a	b	b	a	b	b	a	a	b	a	a	a	a	b
CABMR_04E23	a	a	b	a	a	b	b	b	a	a	b	a	b	b	b	b	b	b	a	a	a	b	a	b	b	a	a	a	a	a	a	b	a	a	b	a	b	a	a	a	b	a	b	a	a	a	a	a	b
CABMR_04F22	b	b	a	a	b	a	a	a	b	a	a	b	b	a	b	b	b	a	b	b	a	b	a	a	b	b	a	b	b	b	a	a	b	a	b	a	a	b	a	a	b	b	b	a	a	b	a	a	b
CABMR_04I19	a	b	a	a	b	b	a	b	a	b	a	a	a	b	a	a	b	b	a	a	b	a	a	a	b	a	b	a	b	a	b	a	a	a	a	b	b	b	b	a	a	b	a	b	b	a	b	b	a
CABMR_04J06	a	a	b	b	a	a	a	b	a	b	b	b	a	a	a	a	b	b	a	a	a	b	b	b	a	a	b	a	b	a	b	b	b	a	b	b	b	b	a	b	b	a	a	b	a	b	a	b	a
CABMR_04K10	b	a	b	b	a	a	a	b	b	a	b	a	b	a	b	a	b	b	a	a	b	b	a	b	b	a	a	b	b	b	b	a	a	a	a	b	b	a	b	a	b	b	b	a	a	a	a	a	a
CABMR_04K19	b	a	b	b	b	b	a	b	a	a	b	a	b	b	a	b	b	a	a	a	a	a	a	a	b	b	a	a	a	a	a	a	b	a	b	a	a	a	b	a	b	a	a	a	b	b	b	a	b
CABMR_04N23	a	a	a	a	a	a	a	b	a	b	a	a	b	a	b	a	b	b	b	b	b	b	b	a	b	b	b	b	b	b	a	a	a	b	a	b	b	a	b	a	b	b	a	b	a	b	b	a	a
CABMR_04O10	a	a	a	b	b	a	a	b	a	a	b	b	a	b	b	a	b	b	a	b	b	a	b	b	a	a	a	b	a	b	b	b	b	b	a	b	a	b	a	b	a	a	a	a	b	b	a	a	b
CABMR_04O18**	a	b	b	a	a	a	a	a	b	b	a	a	b	a	b	a	b	b	a	a	a	a	b	a	b	b	b	a	b	a	b	a	a	a	a	a	a	a	b	b	a	a	a	a	a	a	b	a	b
CABMR_04O23	a	b	b	a	a	b	b	b	a	b	a	a	b	a	a	a	b	a	b	a	a	a	a	b	b	a	a	a	b	a	b	b	a	b	b	a	b	a	b	b	b	a	a	a	a	a	b	a	b
CABMR_04P01	a	a	b	a	a	b	a	b	b	a	b	a	a	b	b	a	a	b	a	a	b	a	a	b	a	a	a	a	a	b	b	b	a	a	b	a	a	b	b	a	b	a	b	b	a	b	a	a	a
CABMR_04P19	a	a	b	a	a	a	a	b	a	b	a	b	b	b	b	b	b	a	a	a	a	a	a	a	a	b	a	a	a	a	a	b	b	a	a	b	a	b	a	a	b	a	a	b	a	b	b	a	a
CABMR_04P23	a	b	a	a	a	a	b	b	b	b	b	a	a	a	a	b	a	b	b	a	a	b	-	b	b	a	b	a	a	a	b	b	b	a	b	a	b	-	a	a	b	a	b	a	a	a	b	a	b
CABMR_05B21	b	a	b	a	a	a	a	a	b	a	a	a	b	b	b	b	b	a	b	a	b	b	a	b	a	a	a	b	b	b	b	a	b	b	b	a	b	a	b	a	b	b	a	a	a	b	a	b	a
CABMR_05H23	a	a	a	a	b	b	a	a	b	a	a	a	a	a	b	a	b	b	a	b	a	a	a	b	b	a	b	a	b	b	a	b	b	a	b	b	b	a	b	a	b	b	b	b	a	b	b	a	b
CABMR_05L23*	a	a	b	b	b	b	a	b	a	a	a	b	a	b	b	b	b	b	b	b	b	a	a	b	a	b	b	a	a	b	b	a	a	b	b	a	a	a	b	b	a	a	b	b	b	b	b	b	b
CABMR_05O14	a	b	b	a	b	a	a	a	b	a	b	a	b	a	b	a	b	a	a	a	a	b	a	b	b	a	b	a	b	a	b	a	b	b	a	b	b	a	b	b	-	a	a	a	b	a	a	b	a
CABMR_06A13	a	a	b	b	a	b	b	a	a	b	b	a	a	b	b	b	b	b	a	a	b	b	b	b	a	b	a	a	a	a	a	a	a	b	b	a	b	a	b	a	b	b	a	a	a	b	a	b	b
CABMR_06B15	a	a	b	a	a	a	a	b	a	b	a	b	b	b	b	b	b	a	a	a	a	a	a	a	a	b	a	a	a	a	a	b	b	a	a	b	a	b	a	a	b	a	a	b	a	b	b	a	a
CABMR_06D24	a	b	b	a	a	b	b	b	a	b	b	a	b	b	b	b	b	b	a	a	a	a	a	b	b	a	a	a	a	a	b	b	a	b	b	a	-	a	a	a	b	a	b	a	a	a	b	a	b
CABMR_06F19	a	b	a	b	b	a	b	a	b	b	a	b	a	b	a	b	a	a	b	a	a	b	a	a	b	a	b	a	b	b	b	b	b	b	b	a	b	b	a	a	b	b	a	a	a	a	a	b	b
CABMR_06I18	a	a	b	a	a	b	a	b	a	a	a	b	a	b	a	a	b	a	b	b	a	b	b	b	a	a	a	b	a	a	b	a	a	b	a	b	b	b	b	b	b	a	b	b	a	b	b	b	b
CABMR_06I23	b	a	a	b	a	a	b	a	a	a	b	a	b	b	a	b	a	a	b	a	b	b	a	b	b	a	b	a	a	a	b	b	a	b	a	a	a	b	a	b	a	a	b	a	a	a	b	a	a
CABMR_06J10	a	b	b	a	a	b	b	b	a	b	a	a	b	a	a	b	b	a	b	a	a	a	a	b	b	a	a	a	a	a	b	b	a	b	b	a	b	a	b	b	b	a	a	a	a	-	b	a	b
CABMR_06K02	b	a	a	a	a	a	b	a	a	a	b	b	b	b	a	a	b	b	-	a	a	b	a	a	b	a	a	b	-	b	b	b	b	a	b	b	a	a	b	b	b	a	a	a	b	b	a	a	b
CABMR_06L08	a	b	a	a	a	a	a	b	b	b	a	a	b	b	b	a	b	b	a	b	a	a	b	a	b	b	a	a	b	a	b	a	b	a	a	a	a	a	b	b	a	a	a	a	a	b	b	a	b
CABMR_06L09**	b	b	b	a	a	a	a	a	b	b	a	a	b	a	b	a	b	b	a	a	a	b	a	a	b	b	b	a	b	a	b	a	a	a	a	a	a	a	b	b	a	a	a	a	a	a	b	a	b
CABMR_06L14	a	b	a	a	b	b	a	b	b	b	a	a	a	b	a	a	b	a	b	a	b	a	a	a	b	a	b	a	b	a	b	a	b	a	a	b	b	b	b	a	a	b	a	b	b	a	b	b	a
CABMR_06M10	a	a	a	b	a	a	b	b	a	b	a	a	b	b	a	a	b	a	b	b	b	a	b	b	b	b	b	a	a	b	a	a	b	b	b	b	a	a	b	b	a	a	a	a	b	b	a	a	b
CABMR_06N13**	a	b	b	a	a	a	a	a	b	b	a	a	b	a	b	a	b	b	a	a	a	a	b	a	b	b	b	a	b	a	b	a	a	a	a	a	a	a	b	b	a	a	a	a	a	a	b	a	b
CABMR_06P08*	a	b	a	a	a	a	b	a	a	a	a	a	a	b	a	b	a	b	a	b	b	b	a	a	a	b	a	a	a	a	a	a	a	a	a	b	a	a	a	b	b	a	a	b	a	a	a	b	a
CABMR_06P15	b	a	a	a	a	b	a	b	b	a	b	a	b	b	b	a	b	a	a	a	a	a	a	a	a	b	a	b	b	b	a	a	b	b	a	b	b	a	a	b	a	b	a	b	a	b	b	b	a
CABMR_07A05	a	b	b	a	b	a	-	a	b	a	b	a	b	a	b	a	b	a	a	a	a	b	a	b	b	a	b	a	b	a	b	a	b	b	a	b	b	a	b	b	-	a	a	a	b	a	a	b	a
CABMR_07D02	a	a	a	a	b	b	b	b	a	a	a	a	b	b	b	b	b	b	a	b	b	b	a	b	a	a	b	a	b	b	b	b	b	a	a	a	b	a	a	b	a	a	a	b	a	a	b	b	a
CABMR_07D04	a	a	a	a	a	b	a	b	b	a	b	a	a	a	a	b	a	a	b	a	a	a	b	b	b	a	b	a	a	b	a	b	a	b	a	b	b	a	a	b	a	b	a	b	a	b	b	b	a
CABMR_07D07	a	b	a	a	a	a	b	a	b	b	b	a	a	a	a	b	b	b	b	a	a	b	b	b	b	a	b	a	a	a	b	b	b	a	b	a	a	a	a	b	b	a	b	a	b	a	b	a	a
CABMR_07E18*	a	a	b	b	a	b	b	b	a	a	b	b	b	b	b	b	a	b	b	a	b	a	a	b	a	b	b	a	a	b	b	a	b	a	b	b	a	a	a	a	b	b	b	a	b	b	b	a	b
CABMR_07E19	b	a	a	a	a	b	a	b	b	a	b	a	b	b	b	a	b	a	a	a	a	a	a	a	a	b	a	b	b	b	a	a	b	b	a	b	b	a	a	b	a	b	a	b	a	b	b	b	a
CABMR_07H02	a	b	a	b	b	a	b	a	b	b	a	b	a	b	a	b	a	a	b	a	a	b	a	a	b	a	b	a	b	b	b	b	b	b	b	a	b	b	a	a	b	b	a	a	b	a	a	b	b
CABMR_07H13	a	b	a	a	a	a	b	b	b	b	b	a	a	a	a	b	a	b	b	a	a	b	b	b	b	a	b	a	a	a	b	b	b	a	b	a	b	a	a	a	b	a	b	a	a	a	b	a	b
CABMR_07I21	b	a	a	b	a	a	b	a	a	a	a	a	b	b	a	b	a	a	b	a	b	b	a	b	b	a	b	a	a	a	b	b	a	b	a	a	a	a	b	b	a	a	b	a	a	a	b	a	b
CABMR_07I24	a	b	a	a	b	b	a	b	b	b	a	a	a	b	a	a	b	a	b	a	b	a	a	a	b	a	b	a	b	a	b	a	b	a	a	b	b	b	-	a	a	b	a	b	b	a	b	b	a
CABMR_07K05	a	a	b	b	a	b	b	a	a	b	b	a	a	b	b	b	b	b	a	a	b	b	b	b	a	b	a	a	a	a	a	a	a	b	b	a	b	a	b	b	b	b	a	a	a	b	b	b	b
CABMR_07K23	a	b	b	a	a	b	b	b	a	b	a	a	b	a	a	b	b	a	b	a	a	a	a	b	b	a	a	a	a	a	b	b	a	b	-	a	-	a	-	b	-	a	a	a	a	a	b	a	b
CABMR_07L05	b	b	b	b	a	a	a	b	b	a	b	a	b	a	b	a	b	b	a	a	b	b	a	b	b	a	a	b	b	a	b	a	a	a	a	b	b	a	b	a	b	b	b	a	b	a	a	a	a
CABMR_07L22	b	b	b	a	b	a	a	b	a	b	a	b	b	b	b	a	b	b	b	a	b	a	b	a	b	a	a	a	a	a	b	b	a	a	a	-	b	a	b	a	a	b	a	b	a	a	a	a	b
CABMR_07M04	b	b	b	a	a	b	a	a	a	b	a	a	b	a	a	b	a	a	b	a	a	a	b	b	b	b	b	a	b	a	a	b	b	b	a	a	b	b	b	b	a	a	a	b	a	b	b	b	a
CABMR_07M19**	b	b	b	a	a	a	a	a	b	b	a	a	b	a	b	a	b	b	a	a	a	b	a	a	b	b	b	a	b	a	b	a	a	a	a	a	a	a	b	b	a	a	a	a	a	a	b	a	b
CABMR_07M23	a	b	b	a	b	b	a	b	a	b	a	a	b	b	a	a	a	b	a	b	a	a	a	a	b	a	b	a	b	a	b	a	a	a	a	b	b	b	b	a	a	b	a	b	b	a	b	b	a
CABMR_07N05	b	a	b	b	b	b	a	b	a	a	b	a	b	b	a	b	b	a	a	a	a	a	a	a	b	b	a	a	a	a	a	a	b	a	b	a	a	a	b	a	b	a	a	a	b	b	b	a	b
CABMR_07N16	b	a	b	a	b	a	a	b	a	b	a	a	b	b	b	a	b	b	b	a	b	a	b	b	b	b	b	a	b	a	b	b	a	a	a	b	b	b	b	a	a	a	b	b	a	a	b	a	b
CABMR_07O23	a	a	b	b	a	a	a	b	a	b	b	a	a	a	a	a	b	b	a	a	a	b	b	b	a	b	b	a	a	a	b	a	b	a	a	b	b	b	a	b	b	a	a	b	a	b	a	b	a
CABMR_07P03	b	a	b	b	b	a	a	b	a	a	b	a	b	b	a	b	b	a	a	a	a	a	a	a	b	b	a	a	a	a	a	a	b	a	b	a	a	a	b	a	b	a	a	a	b	b	b	a	b
CABMR_07P09	a	a	b	a	a	a	a	b	a	b	a	b	b	b	b	b	b	a	a	a	a	a	a	a	a	b	a	a	a	a	a	b	b	a	a	b	a	b	a	a	b	a	a	-	a	b	b	a	a
CABMR_07P10	a	b	a	b	b	a	a	a	b	a	a	a	b	b	b	b	a	a	b	b	b	b	a	b	b	a	b	a	b	b	b	b	a	b	a	b	a	a	b	-	a	a	a	a	-	b	b	b	a
CABMR_07P12	a	b	b	a	a	b	b	b	a	b	b	a	b	b	b	b	b	b	a	a	a	a	a	b	b	a	a	a	a	a	b	b	a	a	b	a	b	a	a	a	b	a	b	a	a	a	b	a	b
CABMR_07P14	a	a	b	a	a	a	a	a	b	b	b	a	b	a	b	b	b	a	b	b	b	b	a	b	b	a	b	a	b	b	b	b	b	b	a	b	b	b	b	a	b	a	b	a	a	b	a	b	a
CABMR_08A19	b	a	a	b	a	a	b	a	a	a	b	a	b	b	a	b	a	a	b	a	b	b	a	b	b	a	b	a	a	a	b	b	a	b	a	a	a	b	a	b	a	a	b	a	a	a	b	a	a
CABMR_08B03	b	b	b	a	b	a	a	b	a	b	a	b	b	b	b	a	b	b	b	a	b	a	b	b	b	b	b	a	b	a	b	b	a	a	a	b	b	a	b	a	a	b	a	b	a	a	a	a	b
CABMR_08B19	a	a	b	a	a	b	b	b	a	a	b	a	a	b	b	b	b	b	a	a	a	b	a	b	b	a	a	a	a	a	a	b	b	a	b	a	b	a	a	a	b	a	b	b	a	a	a	a	b
CABMR_08E02*	a	a	b	a	a	b	b	b	a	a	b	a	a	a	a	b	a	b	a	a	a	b	a	b	b	a	a	a	a	b	a	b	b	a	b	a	b	a	a	a	b	a	b	a	a	a	a	a	b
CABMR_08E04	a	a	a	a	a	b	a	a	b	a	b	b	b	b	b	b	a	a	b	a	a	b	a	a	b	b	a	b	a	a	b	b	a	a	a	a	b	b	a	a	a	b	b	a	b	a	a	b	a
CABMR_08G14	b	b	b	b	a	a	a	b	b	a	b	a	b	a	b	a	b	b	a	a	b	b	a	b	b	a	a	b	b	b	-	a	a	a	a	b	b	a	b	a	b	b	b	a	b	a	a	a	a
CABMR_08I02	b	a	a	a	b	a	b	a	b	a	a	b	a	a	a	b	a	b	b	b	b	b	a	a	b	a	b	a	a	a	b	a	a	b	b	a	a	b	a	b	a	a	b	a	a	b	b	a	a
CABMR_08J01	a	b	a	b	b	a	b	a	b	b	a	b	a	b	a	b	a	a	b	a	a	b	a	a	b	a	b	a	b	b	b	b	b	b	b	a	b	b	a	a	b	b	a	a	b	a	a	b	b
CABMR_08J15	a	b	a	b	b	a	a	a	b	b	a	a	b	b	b	b	a	a	b	b	b	a	a	b	b	a	b	a	b	b	b	b	a	b	a	b	a	a	b	b	a	a	a	a	b	b	b	b	a
CABMR_08K24	b	b	b	a	a	b	a	a	a	b	a	a	b	a	a	b	a	a	b	a	a	a	b	b	b	b	b	a	b	a	a	b	b	b	a	a	b	a	b	b	a	a	a	b	a	b	b	b	a
CABMR_08L05*	a	a	b	b	b	b	a	b	a	a	a	b	a	b	b	b	b	b	b	b	b	a	a	b	a	b	b	a	a	b	b	a	a	b	b	a	a	a	b	b	a	a	b	b	b	b	b	b	b
CABMR_08L14	b	a	b	a	a	a	a	b	a	b	a	b	b	b	b	a	b	b	a	a	b	b	a	b	a	a	a	b	b	b	b	a	a	a	a	b	b	a	b	a	b	b	b	a	a	a	b	a	a
CABMR_08O18	a	b	b	b	b	a	a	a	b	b	a	a	b	a	b	-	b	a	b	b	b	a	a	b	b	a	b	a	b	a	b	b	a	-	a	b	b	a	b	-	b	a	b	a	a	b	a	b	a
Cag-0003	a	a	a	a	a	b	b	a	b	b	b	b	a	a	a	b	a	a	b	a	a	b	a	b	b	b	b	a	a	b	b	b	b	b	a	a	b	b	a	a	b	-	a	-	a	a	a	b	b
Cag-0006	a	a	b	b	a	a	b	a	b	a	b	a	a	a	b	a	a	b	b	b	b	b	a	b	b	b	a	b	b	b	b	a	a	b	a	b	b	b	b	b	a	b	a	a	a	b	a	a	b
Cag-0009	a	b	a	a	a	a	a	b	b	b	a	a	b	b	b	a	b	b	a	a	a	a	b	a	b	b	a	a	b	a	b	a	b	a	a	a	a	a	b	b	a	a	a	a	a	a	b	a	b
CAHMR_01A08	b	a	a	a	a	b	a	b	b	a	b	a	b	b	b	a	b	a	a	a	a	a	a	a	a	b	a	b	b	b	a	a	b	b	a	b	b	-	a	b	a	b	a	b	a	b	b	b	a
CAHMR_01A18	b	b	a	a	b	a	a	a	b	a	a	b	b	a	b	b	b	a	b	b	a	b	a	a	b	b	a	b	-	b	a	a	b	a	b	a	a	b	a	a	b	b	b	a	a	b	a	a	b
CAHMR_01C07	b	a	a	a	a	b	a	b	b	a	b	a	b	b	b	a	b	a	a	a	a	a	a	a	a	b	a	b	b	b	a	a	b	b	a	b	b	a	a	b	-	b	a	b	a	b	b	b	a
CAHMR_01C18	a	a	b	a	a	b	b	b	b	b	b	a	a	a	a	b	a	b	b	a	a	b	a	b	b	a	a	a	a	b	a	b	b	a	b	a	b	a	a	a	b	a	b	a	a	a	a	a	b
CAHMR_01F01	-	a	b	a	b	b	b	b	a	a	b	a	b	b	b	b	b	b	a	a	b	b	a	b	a	a	b	a	a	a	a	b	a	a	a	b	b	a	a	b	a	b	a	b	a	b	b	b	a
CAHMR_01H06	a	a	b	b	a	a	b	a	b	a	b	a	a	a	b	a	a	b	b	b	b	b	a	b	b	b	a	b	-	b	b	-	a	b	a	b	b	-	-	b	a	b	a	a	a	b	a	a	b
CAHMR_01K12	a	a	b	b	a	a	a	b	a	b	b	a	a	a	a	a	b	b	a	a	a	b	b	b	a	b	b	a	a	a	b	a	b	a	a	b	b	b	a	b	b	a	a	b	a	b	a	-	a
CAHMR_01N01	b	a	a	b	a	a	a	a	b	b	a	a	a	a	b	b	a	a	b	a	a	a	b	b	b	-	b	a	b	a	b	b	a	a	a	b	b	b	b	a	a	a	b	b	a	a	a	a	b
CAHMR_01N11	a	b	b	b	a	b	a	a	a	b	-	b	a	a	b	a	b	a	b	a	a	b	a	b	a	a	a	b	a	a	b	a	a	a	b	b	b	b	b	b	a	a	a	b	a	b	a	b	a
CAHMR_01N23	b	a	b	a	a	a	a	b	a	b	a	b	b	b	b	a	b	b	a	a	b	b	a	b	a	a	a	b	b	b	b	a	a	a	a	b	b	a	b	a	b	b	b	a	a	a	b	a	a
CAHMR_01O02	a	b	b	b	a	b	a	a	a	b	b	b	a	a	a	a	b	b	a	a	a	b	b	b	a	a	a	b	a	a	b	a	b	a	b	b	b	b	b	b	a	a	a	b	a	b	a	b	a
CAHMR_02A19	a	a	b	a	a	a	b	b	a	b	a	b	b	a	a	a	b	b	b	b	b	b	b	b	b	b	b	b	b	b	b	a	a	b	b	a	b	a	b	a	b	b	a	b	b	b	b	b	a
CAHMR_02C06	a	b	b	a	a	b	b	b	a	b	a	a	b	a	a	b	b	a	b	a	a	a	a	b	b	a	a	a	a	a	b	b	a	b	b	a	b	a	b	b	b	a	a	a	a	a	b	a	b
CAHMR_02D04	a	a	b	a	a	a	-	b	a	b	-	b	b	b	b	b	b	a	a	a	a	a	-	-	a	b	-	a	a	a	a	b	b	-	a	b	a	b	a	a	b	a	a	b	a	b	b	a	a
CAHMR_02G20	a	b	b	a	b	b	a	b	a	b	b	a	b	b	a	a	a	b	a	b	a	a	a	a	b	a	b	a	b	a	b	a	a	a	a	b	b	b	b	a	a	b	a	b	b	a	b	b	a
CAHMR_02H17	b	a	b	a	b	b	b	a	b	b	a	b	b	b	b	b	a	b	a	b	b	a	a	a	a	a	a	a	a	a	b	a	b	a	a	b	b	a	b	a	a	a	b	a	a	b	a	a	b
CAHMR_02J16	a	a	a	b	a	b	b	a	a	b	b	a	a	b	b	b	b	b	a	a	b	b	b	b	a	b	b	a	a	b	a	a	a	b	b	a	-	a	b	b	a	b	a	b	a	b	b	b	b
CAHMR_02M02*	b	a	a	a	b	a	a	b	b	b	b	b	b	a	b	b	b	a	b	b	a	b	a	b	b	a	b	b	a	a	b	b	a	b	a	b	a	b	b	b	b	b	a	b	b	b	b	b	b
CAHMR_02N09	a	a	a	a	b	b	b	b	a	b	a	a	a	a	b	b	a	-	b	a	a	a	b	b	b	a	a	b	b	a	a	b	-	b	b	a	b	a	a	a	b	b	b	b	a	b	b	b	a
CAHMR_02O22	a	b	a	a	a	a	a	b	b	b	a	a	b	b	b	a	b	b	a	b	a	a	b	-	b	b	a	a	b	a	b	a	b	a	a	a	a	a	b	b	a	a	a	a	a	b	b	a	b
CAHMR_02P01	b	a	b	b	b	-	a	b	a	a	b	a	b	b	a	b	b	a	a	a	a	a	a	a	b	b	a	a	a	a	a	a	b	a	b	a	a	a	b	a	b	a	a	a	b	b	b	a	b
CAHMR_02P17	b	a	b	b	a	a	a	b	b	b	a	a	b	a	b	a	b	a	b	a	b	a	b	b	b	b	b	a	b	a	b	b	a	a	a	b	b	b	b	a	a	a	b	b	-	a	b	a	b
CAHMR_03A06	b	b	a	a	b	b	b	a	b	a	b	a	a	a	a	b	a	b	a	b	b	b	a	a	a	a	b	a	a	a	b	a	b	a	b	a	a	a	b	b	a	a	b	a	a	b	b	b	a
CAHMR_03A17**	b	b	b	b	b	a	b	a	b	b	a	a	a	b	a	b	b	b	b	a	b	a	b	b	a	-	a	b	b	b	b	a	b	b	b	b	b	b	a	a	b	b	a	a	b	a	a	a	b
CAHMR_03A23	a	b	b	b	b	a	a	a	b	b	a	a	b	b	b	b	a	a	b	b	b	a	a	b	b	a	b	a	b	b	b	b	a	b	a	b	a	a	b	a	b	a	b	a	a	b	b	b	a
CAHMR_03C06	b	a	a	a	b	b	b	b	a	a	b	a	b	b	b	b	b	b	a	b	b	b	a	b	a	a	b	a	a	b	b	b	a	a	a	b	b	a	a	b	a	b	a	b	a	b	b	b	a
CAHMR_03E19	a	a	a	b	a	a	b	a	a	a	b	a	b	a	a	b	a	b	b	b	b	a	a	-	b	a	-	a	b	a	b	b	a	b	a	b	b	b	b	b	a	b	b	a	a	a	a	a	b
CAHMR_03F08	b	a	a	a	a	a	-	b	a	a	b	b	b	b	a	a	b	b	a	a	a	b	a	a	b	a	a	b	b	b	b	b	-	a	b	b	a	a	b	b	b	a	a	a	b	b	a	a	b
CAHMR_03F10	a	b	a	b	a	a	b	a	-	a	a	a	a	b	a	b	a	b	a	b	b	b	a	a	a	b	a	a	a	a	a	a	a	a	a	b	a	a	a	b	b	a	a	b	a	a	a	b	-
CAHMR_03H08	a	a	a	a	a	a	a	a	b	b	b	a	b	a	b	b	b	a	b	b	b	b	a	a	a	a	b	a	b	b	b	b	b	b	a	b	b	b	b	a	b	a	b	a	a	a	a	b	a
CAHMR_03H20	a	b	b	a	b	a	a	a	b	a	b	a	b	b	b	a	b	a	a	a	a	b	a	a	b	a	b	a	b	a	b	a	b	b	a	b	b	a	b	b	b	a	a	a	b	a	b	b	a
CAHMR_03H24	a	b	b	a	b	a	a	a	b	a	b	a	b	b	b	a	b	a	a	a	a	b	a	a	b	a	b	a	b	a	b	a	b	b	a	b	b	a	b	b	b	a	a	a	b	a	b	b	a
CAHMR_03I02	b	a	b	b	b	-	a	b	a	a	b	a	b	b	a	b	b	a	a	a	a	a	a	a	b	b	a	a	-	a	a	-	b	a	b	a	a	a	b	a	b	a	a	a	b	b	b	a	b
CAHMR_03I13	a	a	b	a	a	b	a	b	a	a	a	b	a	b	a	a	b	a	b	b	a	b	b	b	a	a	a	b	a	a	b	a	a	b	a	b	b	b	b	b	b	a	b	b	a	b	b	b	b
CAHMR_03J23	a	a	b	b	a	a	a	b	-	a	b	a	a	b	a	b	b	a	b	a	a	a	b	a	b	a	a	a	a	b	b	a	b	a	a	b	a	b	a	a	a	a	b	a	a	b	b	b	a
CAHMR_03K05**	b	b	b	a	a	a	a	a	b	b	a	a	b	a	b	a	b	b	a	a	a	b	a	a	b	b	b	a	a	a	b	a	a	a	a	a	a	a	b	b	a	a	a	a	a	a	b	a	b
CAHMR_03K09	a	b	b	b	a	b	a	a	a	b	a	b	a	b	b	a	b	a	b	a	a	-	a	b	a	a	a	b	a	a	b	a	a	b	b	b	b	b	b	b	a	a	b	b	-	b	a	b	b
CAHMR_03L03	a	b	b	a	a	b	a	b	a	b	b	a	b	b	a	a	a	a	a	b	a	a	b	a	b	b	b	a	a	a	b	a	a	b	a	b	a	b	b	a	b	b	a	b	b	b	b	b	a
CAHMR_03M24	b	a	a	a	a	a	b	a	a	a	b	b	b	b	a	a	b	b	a	a	a	b	a	a	b	a	a	b	b	b	b	b	b	a	b	b	a	a	b	b	b	a	a	a	b	b	a	a	b
CAHMR_03N21*	a	b	a	a	a	a	a	b	b	-	a	a	b	b	b	a	b	-	a	a	a	a	b	a	b	b	a	a	-	a	b	a	b	a	a	a	a	a	b	b	a	a	a	a	a	a	b	a	b
CAHMR_03N24	a	a	a	b	b	a	b	b	b	a	b	a	b	a	a	b	a	b	a	b	a	b	a	b	b	b	a	b	b	b	a	b	a	a	-	b	b	a	-	b	b	b	a	a	b	a	b	b	a
CAHMR_03O04	a	b	b	b	a	b	a	a	a	b	b	b	a	b	b	a	b	a	b	a	a	b	a	b	a	a	a	b	a	a	b	a	a	b	-	b	b	b	b	b	a	a	b	b	a	b	a	b	a
CAHMR_03P06	a	b	b	a	b	b	a	b	a	b	a	a	b	b	a	a	a	b	a	b	a	a	a	a	b	a	b	a	b	a	b	a	a	a	a	b	b	b	b	a	a	b	a	b	b	a	b	b	a
CAHMR_03P24	b	a	b	b	a	a	a	b	b	b	a	a	b	a	b	a	b	a	b	a	b	a	b	b	b	b	b	a	b	a	b	b	a	a	a	b	b	b	b	a	a	a	b	b	a	a	b	a	b
CAHMR_04B11	a	b	a	a	b	b	a	b	a	b	a	a	b	b	a	a	b	-	a	a	b	a	a	a	b	a	b	a	b	a	b	a	a	a	a	b	b	b	b	a	a	b	a	b	b	a	b	b	a
CAHMR_04C22	a	b	a	a	a	a	b	b	b	b	b	a	a	a	a	b	a	b	b	a	a	b	b	b	b	a	b	a	a	a	b	b	b	a	b	a	b	a	a	a	b	a	b	a	a	a	b	a	b
CAHMR_04D02	b	b	b	b	b	a	b	a	b	b	a	a	a	b	a	b	-	b	b	a	a	b	a	b	a	a	a	b	b	b	b	a	a	b	b	b	b	b	a	a	b	b	a	a	b	a	a	a	b
CAHMR_04D20	a	b	b	b	a	b	a	a	a	b	a	b	a	b	b	a	b	a	b	a	a	b	a	b	a	a	a	b	a	a	b	a	a	b	b	b	b	b	b	b	a	a	b	b	a	b	a	b	b
CAHMR_04E23	a	a	a	b	a	a	b	b	a	b	a	a	b	b	b	a	b	a	b	a	b	a	b	b	b	b	b	a	b	b	a	a	a	b	b	b	a	a	b	a	b	b	a	a	-	a	a	a	a
CAHMR_04F07	b	a	b	a	b	a	b	b	a	a	b	a	b	b	b	b	b	b	a	a	b	b	a	b	a	a	b	a	a	a	a	b	a	a	a	b	b	a	a	b	a	b	a	b	a	b	b	b	a
CAHMR_04F10	a	b	b	a	b	b	a	b	a	b	b	a	b	b	a	a	a	b	a	b	a	a	a	a	b	a	b	a	b	a	b	a	a	-	a	b	b	b	b	a	a	b	a	b	b	a	b	b	a
CAHMR_04G23	b	a	b	a	a	b	a	b	b	a	b	a	b	b	b	b	b	a	a	a	b	a	a	a	a	b	a	b	b	b	a	a	b	b	b	a	b	a	b	b	b	b	a	b	a	b	b	b	a
CAHMR_04I09	b	a	a	a	a	a	a	a	b	b	b	a	b	a	b	b	b	b	a	b	b	b	a	a	a	a	b	a	b	b	b	b	b	b	a	b	b	b	b	a	b	a	b	a	a	a	a	b	a
CAHMR_04I10	a	a	a	a	b	b	-	b	a	b	a	a	a	b	b	b	a	b	b	a	a	a	b	b	a	a	a	b	b	a	a	b	a	b	b	a	b	a	a	a	a	b	b	b	a	b	b	b	a
CAHMR_04I12**	a	b	a	b	a	a	-	a	a	a	a	a	a	b	a	b	a	b	a	b	b	b	a	a	a	-	a	a	a	a	a	a	a	a	a	b	a	a	a	-	b	a	a	b	a	a	a	b	a
CAHMR_04J17	b	a	a	b	a	a	a	a	b	b	a	a	a	b	b	b	a	a	b	b	a	b	a	b	a	a	b	a	b	b	a	b	a	a	a	a	b	b	b	b	a	a	a	b	b	b	a	a	b
CAHMR_04L02	a	a	a	a	a	b	a	a	b	a	b	b	b	b	b	b	a	a	b	a	a	b	a	a	b	b	a	b	a	a	b	b	a	a	a	a	b	b	a	a	a	b	b	a	b	a	a	b	a
CAHMR_04N24	b	a	b	a	b	b	b	a	b	b	a	b	b	b	b	b	a	b	a	b	b	a	a	a	a	a	a	a	a	a	b	a	b	a	a	b	b	a	b	a	a	a	b	a	a	b	a	a	-
CAHMR_05B20	a	a	a	a	a	b	a	b	b	a	b	a	a	a	a	b	-	a	b	a	a	a	b	b	b	a	b	a	a	b	a	b	a	b	a	b	b	a	a	b	a	b	a	b	a	b	b	b	a
CAHMR_05C20	b	a	b	b	b	-	a	b	a	a	b	a	b	b	a	b	b	a	a	a	a	a	a	-	b	b	a	a	a	a	a	a	b	a	b	a	a	a	b	a	b	a	a	a	b	b	b	a	b
CAHMR_05D06	a	a	a	a	b	b	b	b	a	-	a	a	a	a	b	b	a	b	b	a	a	a	b	b	b	a	-	b	b	a	a	b	b	b	-	a	b	a	a	a	b	-	b	b	a	b	b	b	a
CAHMR_05D24	b	b	b	b	b	a	b	a	b	b	a	a	a	b	a	b	b	b	a	a	b	a	b	b	a	a	a	b	b	b	b	a	b	b	b	b	b	b	a	a	b	b	a	a	b	a	a	a	b
CAHMR_05E03	a	a	a	a	b	b	b	b	a	b	a	a	a	b	b	b	a	b	b	a	a	a	b	b	a	a	a	b	b	a	a	b	a	b	b	a	b	a	a	a	a	b	b	b	a	b	b	b	a
CAHMR_05E06	b	a	b	b	b	b	a	b	a	a	b	a	b	b	a	b	b	a	a	a	a	a	a	a	b	b	a	a	a	a	a	a	b	a	b	a	a	a	b	a	b	a	a	a	b	b	b	a	b
CAHMR_05G10	a	b	b	a	b	a	a	a	b	a	b	a	b	b	b	a	b	a	a	a	a	b	a	a	b	a	b	a	b	a	b	a	b	b	a	b	b	a	b	b	b	a	a	a	b	a	b	b	a
CAHMR_05H16	a	b	b	a	a	b	b	b	a	b	b	a	b	b	b	b	b	b	a	a	a	a	a	b	b	a	a	a	-	a	b	-	a	a	b	a	b	a	a	a	b	a	b	a	a	a	b	a	b
CAHMR_05I04	-	b	b	a	a	b	b	b	a	b	b	a	b	b	b	b	b	b	a	a	a	a	a	b	b	a	a	a	a	a	b	b	a	a	b	a	b	a	a	a	b	a	b	a	a	a	a	a	b
CAHMR_05K11	b	a	b	b	b	-	a	b	a	a	b	a	b	b	a	b	b	a	a	a	a	a	a	a	b	b	a	a	a	a	a	a	b	a	b	a	a	a	b	a	b	a	a	a	b	b	b	a	b
CAHMR_05M06	b	a	a	a	b	a	a	b	b	a	b	b	b	a	b	b	b	a	b	b	a	b	a	b	b	a	a	b	a	a	b	b	a	b	a	b	a	b	b	b	b	b	a	b	b	b	b	b	b
CAHMR_05M17	b	a	a	a	a	b	a	b	b	a	b	a	b	b	b	a	b	a	a	a	a	a	a	a	a	b	a	b	b	b	a	a	b	b	-	b	b	a	a	b	a	b	a	b	a	b	b	b	a
CAHMR_05N09**	b	b	a	a	a	a	b	a	a	a	a	a	a	b	a	b	a	b	a	b	b	b	a	a	a	b	a	a	a	a	a	a	a	a	a	b	a	a	a	a	b	a	b	a	a	a	a	b	a
CAHMR_05O12	a	a	a	a	a	b	a	b	b	a	b	a	a	b	b	a	a	-	a	a	a	a	-	b	a	a	a	b	b	b	a	b	a	b	b	a	b	b	b	a	b	b	b	b	b	b	a	b	a
CAHMR_05P09	a	a	a	a	b	b	b	b	a	b	a	a	a	a	b	b	a	b	b	a	a	a	b	-	b	a	a	b	b	a	a	b	b	b	b	a	b	a	a	a	b	b	b	b	a	b	b	b	a
CAHMR_06A08	a	a	a	b	a	b	b	a	a	b	b	a	a	-	b	b	b	b	a	a	b	b	b	b	a	b	b	a	a	b	a	a	a	b	b	a	b	a	b	b	a	b	a	b	a	b	b	b	b
CAHMR_06B02	b	a	b	b	b	b	a	b	a	a	b	a	b	-	a	b	b	a	a	a	a	a	a	a	b	b	a	a	a	a	a	a	b	a	b	a	a	a	b	a	b	a	a	a	b	b	b	a	b
CAHMR_06D05	a	a	a	a	b	b	a	a	b	a	a	a	a	a	b	a	b	b	a	b	b	b	a	b	b	a	b	a	b	b	a	b	b	a	b	b	a	a	b	a	b	b	b	a	a	b	b	a	b
CAHMR_06G09	b	a	a	b	b	a	a	a	a	b	b	b	a	b	b	b	a	b	a	a	b	b	a	a	a	b	a	b	a	a	a	b	a	b	b	b	b	a	a	b	a	a	a	b	a	b	b	a	b
CAHMR_06G21	b	a	a	a	a	b	a	b	b	a	b	a	b	b	b	a	b	a	a	a	b	a	a	a	a	b	a	b	b	b	a	a	b	b	a	b	b	a	a	b	a	b	a	b	a	b	b	b	a
CAHMR_06H07**	b	b	b	a	a	a	a	a	b	b	a	a	b	a	b	a	b	b	a	a	a	b	a	a	b	b	b	a	a	a	b	a	a	a	a	a	a	a	b	b	a	a	a	a	a	a	b	a	b
CAHMR_06I09	a	b	-	b	a	b	a	a	a	b	b	b	a	a	b	a	b	a	b	a	a	b	a	b	a	a	a	b	a	a	b	a	a	a	b	b	b	b	b	b	a	a	a	b	a	b	a	b	a
CAHMR_06K18	b	a	b	b	a	a	a	b	b	b	a	a	b	a	b	a	b	a	b	a	b	a	b	b	b	b	b	a	b	a	b	b	a	-	a	b	b	b	b	a	a	a	b	b	a	a	b	a	b
CAHMR_06K21	a	a	b	a	a	b	a	b	a	a	a	b	a	b	a	a	b	a	b	b	a	b	b	b	a	a	a	b	a	a	b	a	a	b	a	b	b	b	b	b	b	a	b	b	a	b	b	b	b
CAHMR_06L18	a	a	b	a	a	b	b	b	a	a	b	a	b	b	b	b	b	b	a	a	a	b	a	b	b	a	a	a	a	a	a	b	b	a	b	a	b	a	a	a	b	a	b	b	a	a	a	a	b
CAHMR_07C05**	b	b	b	a	a	a	a	a	b	b	a	a	b	a	b	a	b	b	a	a	a	b	a	a	b	b	-	a	b	a	b	a	a	a	a	a	a	a	b	b	a	a	a	a	a	a	b	a	b
CAHMR_07D15	a	a	-	b	a	b	b	a	a	b	b	a	a	b	b	b	b	b	a	a	b	b	b	b	b	b	a	a	a	a	a	a	b	b	b	a	b	a	b	a	b	b	a	a	a	b	a	b	b
CAHMR_07D17	a	b	b	b	b	b	a	b	a	b	a	b	a	b	b	b	a	b	a	b	b	a	a	b	a	b	a	a	a	b	a	b	b	b	b	a	a	a	b	b	a	a	b	b	b	b	b	b	b
CAHMR_07E02	a	a	b	a	a	a	b	b	a	b	a	b	b	a	a	a	b	b	b	b	b	b	b	b	b	b	b	b	b	b	b	a	a	b	b	a	b	a	b	a	b	b	a	b	b	b	b	b	a
CAHMR_07F21	b	a	a	b	b	a	a	a	a	b	b	b	a	b	b	b	a	b	a	a	b	b	a	-	a	b	a	b	a	a	a	b	a	b	b	b	b	a	a	b	a	a	a	b	a	b	b	a	b
CAHMR_07G08	a	a	a	a	b	b	b	b	a	b	a	a	a	b	b	b	a	b	b	a	a	a	b	b	a	a	a	b	b	a	a	b	a	b	b	a	b	a	a	a	a	b	b	b	a	b	b	b	a
CAHMR_07G23	b	b	b	b	a	a	a	b	b	a	b	a	b	a	b	a	b	b	a	a	b	b	a	b	b	a	a	b	-	a	b	a	a	a	a	b	b	a	b	a	-	b	b	a	b	a	a	a	a
CAHMR_07H13	a	a	a	b	a	a	b	b	a	b	a	a	b	b	a	a	b	a	b	b	b	a	b	b	b	b	b	a	a	b	a	a	b	b	b	b	a	a	b	b	a	a	a	a	b	b	a	a	b
CAHMR_07H22	a	a	a	a	b	b	b	b	a	b	a	a	a	a	b	b	a	b	b	a	a	a	b	b	b	a	a	b	b	a	a	-	b	b	b	a	b	a	a	a	b	b	b	b	a	b	b	b	a
CAHMR_07I02	b	b	b	a	b	a	a	a	b	b	b	a	a	a	b	a	a	b	b	b	a	b	a	b	b	b	b	a	a	a	a	a	a	a	b	a	b	a	b	b	a	a	b	b	b	a	b	a	b
CAHMR_07I22	a	a	a	a	b	b	b	b	a	b	a	a	a	a	b	b	a	b	b	a	a	a	b	b	b	a	a	b	b	a	a	b	b	b	b	a	b	a	a	a	b	b	b	b	a	b	b	b	a
CAHMR_07J01	a	b	b	a	a	a	a	b	b	b	a	a	b	b	b	a	b	b	a	a	a	a	b	a	b	b	a	a	b	a	b	a	b	a	a	a	a	a	b	b	a	a	a	a	a	a	b	a	b
CAHMR_07K01	a	b	b	b	b	a	a	a	b	a	a	a	b	a	b	b	b	a	b	b	b	a	a	b	b	a	b	a	b	a	b	b	a	b	a	b	a	a	b	a	b	a	b	a	a	b	b	b	a
CAHMR_07L16	a	b	b	a	b	a	a	a	b	a	b	b	b	a	b	a	b	b	a	a	a	b	a	b	b	a	b	a	a	a	b	a	b	b	b	b	b	a	b	b	b	a	a	b	b	a	a	b	a
CAHMR_07N06	a	a	b	a	a	a	a	b	a	b	a	b	b	b	b	b	b	a	a	a	a	a	a	a	a	b	a	a	a	a	a	b	b	a	a	b	a	b	a	a	b	a	a	b	a	b	b	a	a
CAHMR_07P11	b	a	a	b	b	a	a	a	a	b	b	b	a	b	b	-	a	b	a	a	b	b	a	a	a	b	a	b	a	a	a	-	a	b	-	b	b	a	a	b	a	a	a	b	a	b	b	a	b
CAHMR_07P17	b	a	a	a	a	b	a	b	b	a	b	a	b	b	b	a	b	a	a	a	b	a	a	a	a	b	a	b	-	b	a	a	b	b	a	b	b	-	a	b	a	b	a	b	a	b	b	b	a
CAHMR_08A01	a	b	a	a	b	b	a	b	a	b	a	a	b	b	a	a	a	b	a	a	b	a	a	a	b	a	b	a	b	a	b	a	a	a	a	b	b	b	b	a	a	b	a	b	b	a	b	b	a
CAHMR_08B05	a	b	a	a	b	b	a	b	a	b	a	a	b	b	a	a	a	b	a	b	a	a	a	a	b	a	b	a	b	a	b	a	a	a	a	b	b	b	b	a	a	b	a	b	b	a	b	b	a
CAHMR_08B17	a	a	a	a	b	b	b	b	a	b	a	a	a	a	b	b	a	b	b	a	a	-	b	b	b	a	a	b	b	a	a	b	-	b	b	a	b	a	a	a	b	b	b	b	a	b	b	b	a
CAHMR_08B22	b	a	a	b	b	a	b	b	b	a	b	a	b	a	a	b	a	b	a	b	a	b	a	b	b	b	a	b	a	b	a	b	a	a	a	b	b	a	b	b	b	b	a	a	a	a	b	b	a
CAHMR_08C07*	a	b	a	a	a	a	b	a	-	a	a	a	a	b	a	b	a	b	a	b	b	b	a	a	a	b	a	a	a	a	a	a	a	a	a	b	a	a	a	a	-	a	b	b	a	a	a	b	a
CAHMR_08D20	a	b	b	a	b	a	a	a	b	a	b	b	b	a	b	a	b	b	a	a	a	b	a	b	b	a	b	a	a	a	b	a	b	b	b	b	b	a	b	b	b	a	a	b	b	a	a	b	a
CAHMR_08E12	a	a	b	b	a	a	a	b	a	b	b	a	a	a	a	a	b	-	a	a	a	b	b	b	a	b	b	a	a	a	b	a	b	a	a	b	b	b	a	b	-	a	a	b	a	b	a	b	a
CAHMR_08F16	a	a	a	a	a	b	a	b	b	a	b	a	a	a	a	b	b	a	b	a	a	-	b	b	b	a	b	a	a	b	a	b	a	b	a	b	b	a	a	b	a	b	a	b	a	b	b	b	a
CAHMR_08G14	b	b	a	a	b	a	a	b	a	b	b	b	b	a	b	a	a	b	a	b	a	a	a	b	a	b	a	b	b	a	a	a	a	b	b	b	b	a	b	b	b	a	a	a	a	a	b	a	b
CAHMR_08H09	b	b	b	b	a	a	a	b	b	a	b	a	b	a	b	a	b	b	a	a	b	b	a	b	b	a	a	b	b	a	b	a	a	a	a	b	b	-	b	a	b	b	b	a	b	a	a	a	a
CAHMR_08I06	b	a	b	b	a	a	a	b	b	a	b	a	b	a	b	a	b	b	a	a	b	b	a	b	b	a	a	b	b	b	b	a	a	a	a	b	b	a	b	a	b	b	b	a	a	a	a	a	a
CAHMR_08I14	b	a	b	a	a	a	a	b	a	b	a	b	b	b	b	a	b	b	a	a	b	b	a	b	a	a	a	b	b	b	b	a	a	a	a	b	b	a	b	a	b	b	b	a	a	a	b	a	a
CAHMR_08L11*	a	b	a	b	a	a	b	a	a	a	a	a	a	b	a	b	a	b	a	b	b	b	a	a	a	b	a	a	a	a	a	a	a	a	a	b	a	a	a	b	b	a	a	b	a	a	a	b	a
CAHMR_08L13	b	b	b	b	a	a	a	b	b	a	b	a	b	a	b	a	b	b	a	a	b	b	a	b	b	a	a	b	b	a	b	a	a	a	a	b	b	a	b	a	b	b	b	a	b	a	a	a	a
CAHMR_08M22	b	a	b	a	a	a	a	b	a	b	a	b	b	b	b	a	b	b	a	a	b	b	a	b	a	a	a	b	b	b	b	a	a	a	a	b	b	a	b	a	b	b	b	a	a	a	b	a	a
CAHMR_08N04	b	a	b	a	b	a	a	b	a	b	a	b	b	b	b	a	b	b	b	a	b	-	b	b	b	b	b	a	b	a	b	b	a	a	-	b	b	b	b	a	a	b	a	b	a	a	b	a	b
CAHMR_08O04	a	a	b	b	a	a	a	b	a	a	b	a	a	b	a	b	b	a	b	a	a	a	b	a	b	a	a	a	a	b	b	a	b	a	a	b	a	b	a	a	a	a	b	a	a	b	b	b	a
CAHMR_08O05	b	a	b	a	a	a	a	b	a	b	a	-	b	b	b	a	b	b	a	a	b	b	a	b	a	a	a	b	b	b	b	-	a	-	b	a	a	a	b	a	b	b	a	a	a	a	b	a	b
CAHMR_08O12	-	b	a	a	a	a	b	b	b	b	b	a	a	a	a	b	a	b	b	a	a	b	b	b	b	a	b	a	a	a	b	b	b	a	b	a	b	a	a	a	b	a	b	a	a	a	b	a	b
CAHMR_08O16	b	a	a	a	b	b	b	b	a	a	a	a	b	b	b	b	b	b	a	b	b	b	a	b	a	a	b	a	b	b	b	b	b	a	a	a	b	a	a	b	a	b	a	b	a	b	b	b	a
CAHMR_08O18	b	a	b	b	b	-	a	b	a	a	b	a	b	b	a	b	b	a	a	a	a	a	a	a	b	b	a	a	a	a	a	a	b	a	b	a	a	a	b	a	b	a	a	a	b	b	b	a	b
CBBMR_09B23	a	a	a	a	b	b	a	a	b	a	a	a	a	a	b	a	b	b	a	b	b	b	a	b	b	a	b	a	b	b	a	b	b	a	b	b	b	a	b	a	b	b	b	b	a	b	b	a	b
CBBMR_09C04	b	b	b	a	a	b	a	a	a	b	a	a	b	a	a	b	a	a	b	a	a	a	b	b	b	b	b	a	b	a	a	b	b	b	a	a	b	b	b	b	a	a	a	b	a	b	b	b	a
CBBMR_09C10	b	b	b	b	b	a	b	a	b	b	a	a	a	b	a	b	b	b	b	a	a	b	a	b	a	a	a	b	b	b	b	a	a	b	b	b	b	b	a	a	b	b	a	a	b	a	a	a	b
CBBMR_09I17	a	a	a	b	a	b	a	b	b	b	b	a	a	a	b	b	b	a	b	a	b	b	b	b	a	a	b	a	a	b	a	b	a	b	a	b	b	a	b	b	a	b	a	b	a	b	b	b	b
CBBMR_09J03	a	a	a	b	b	a	b	b	b	a	b	a	b	a	a	b	a	b	a	b	b	b	a	b	b	b	a	b	b	b	a	b	a	a	a	b	b	a	b	a	b	b	b	a	b	a	b	b	a
CBBMR_09J20	b	a	a	b	a	a	a	a	b	b	a	b	a	b	b	b	a	a	b	b	a	b	a	b	a	a	b	a	b	b	a	b	a	a	a	a	b	b	b	b	a	a	a	b	b	b	a	a	b
CBBMR_09L05	a	a	a	b	b	a	b	b	b	a	b	b	b	a	a	b	a	b	a	b	b	b	a	b	b	b	a	b	b	b	a	b	a	a	a	a	b	a	b	a	b	b	b	a	b	a	b	b	a
CBBMR_09M11	a	b	a	a	-	b	a	b	a	b	a	a	b	b	a	a	a	b	a	b	a	a	a	a	b	a	b	a	b	a	b	a	-	a	a	b	b	b	b	a	a	b	a	b	b	a	b	b	-
CBBMR_09M23	a	a	b	b	a	b	b	a	a	b	b	a	a	b	b	b	b	b	a	a	b	b	b	b	a	b	a	a	a	a	a	a	a	b	b	a	b	a	b	b	b	b	a	a	a	b	a	b	b
CBBMR_09P05**	b	b	b	a	a	a	a	a	b	b	a	a	b	a	b	a	b	-	a	a	a	b	a	a	b	b	b	a	b	a	b	a	a	a	a	a	a	a	b	b	a	a	a	a	a	a	b	a	b
CBBMR_10A19	a	a	a	b	a	a	b	b	b	b	a	a	b	b	b	a	b	a	b	a	b	a	b	b	b	b	b	a	b	b	a	a	a	b	b	b	a	a	b	a	b	b	a	a	a	a	a	a	a
CBBMR_10B09	a	-	b	a	a	b	b	b	a	b	a	b	b	a	a	b	b	a	b	a	a	a	a	b	b	a	a	a	a	a	b	b	a	b	b	a	b	a	b	b	b	a	a	a	a	a	b	a	b
CBBMR_10B19	b	a	a	b	a	a	a	a	b	b	a	a	a	b	b	b	a	a	b	b	a	b	a	b	a	a	b	a	b	-	a	b	a	a	a	a	b	b	b	b	a	a	a	b	b	b	a	a	b
CBBMR_10B23	b	b	a	a	a	a	a	a	a	a	b	b	b	a	a	a	-	b	a	b	a	a	a	a	b	b	a	b	b	a	b	b	a	b	b	b	b	a	b	b	b	a	a	a	a	-	b	a	b
CBBMR_10C10*	b	b	b	b	b	a	b	a	b	b	a	a	a	b	a	b	b	b	b	a	a	b	a	b	a	a	a	b	b	b	b	-	b	b	b	b	b	b	a	a	b	b	a	a	b	a	a	a	b
CBBMR_10C19	b	a	a	b	a	a	a	a	b	b	a	a	a	b	b	b	a	a	b	b	a	b	a	b	a	a	b	a	b	b	a	b	a	a	a	a	b	b	b	b	a	a	a	b	b	b	a	a	b
CBBMR_10F14	b	b	b	a	b	a	a	b	a	b	a	b	-	b	b	a	b	b	b	a	b	a	b	b	b	b	b	a	b	a	b	b	a	a	a	b	b	a	b	a	a	b	a	b	a	a	a	a	b
CBBMR_10G11	a	b	a	a	b	b	a	b	a	b	a	a	a	b	a	a	b	b	a	a	b	a	a	a	b	a	b	a	b	a	b	a	a	a	a	b	b	b	b	a	a	b	a	b	b	a	b	b	a
CBBMR_10J15	a	b	a	b	a	a	b	a	a	a	b	a	a	a	a	a	a	b	b	b	b	b	a	b	b	b	a	b	b	a	b	a	a	b	a	b	b	b	b	b	a	b	a	a	a	b	a	a	b
CBBMR_10K04	b	b	a	b	b	a	a	a	b	b	a	b	a	b	a	a	a	a	b	a	b	a	b	a	b	a	a	a	a	a	a	a	a	a	a	b	b	b	b	b	a	a	a	a	b	b	b	-	b
CBBMR_10K06	a	b	b	a	a	b	b	b	a	b	a	b	b	a	a	b	b	a	b	a	a	a	a	b	b	a	a	a	a	a	b	-	a	b	b	a	b	a	b	-	b	a	a	a	a	a	b	a	b
CBBMR_10K24	b	b	b	a	b	a	a	b	a	b	a	b	b	b	b	a	b	b	b	a	b	a	b	b	b	b	b	a	b	a	b	b	a	a	a	b	b	a	b	a	a	b	a	b	a	a	a	a	b
CBBMR_10M04	b	a	a	a	a	b	b	b	a	a	b	b	a	a	a	b	a	b	a	a	a	b	a	b	b	b	b	a	a	b	b	b	b	b	a	a	b	b	a	b	b	a	a	b	a	a	a	a	b
CBBMR_11B02	a	a	-	b	a	a	a	b	a	b	b	a	a	a	a	a	b	b	a	a	a	b	b	b	a	b	b	-	a	a	b	a	b	a	a	b	b	b	a	a	b	a	-	b	a	b	a	b	a
CBBMR_11E02	a	a	-	a	b	b	b	b	a	a	a	a	b	b	b	a	b	b	a	b	a	b	a	b	a	a	b	a	b	b	b	b	b	a	a	a	b	a	a	b	a	a	a	b	a	a	b	b	a
CBBMR_11I13	a	b	b	a	a	b	b	b	a	b	a	b	b	a	a	b	b	a	b	a	a	a	a	b	b	a	a	a	a	a	b	b	a	b	b	a	b	a	b	b	b	a	a	a	a	a	b	a	b
CBBMR_11N22	a	a	b	b	a	a	a	b	a	a	b	a	a	b	a	b	b	b	a	a	a	a	b	b	a	b	b	a	a	a	b	a	b	a	a	b	a	b	a	a	a	a	b	a	a	b	a	b	a
CBBMR_11O13	b	b	b	a	b	a	a	b	a	b	a	b	b	b	b	a	b	b	b	a	b	a	b	b	b	b	b	a	b	a	b	b	a	a	a	b	b	a	b	a	a	b	a	b	a	a	a	a	b
CBBMR_12I02	a	a	b	b	a	a	a	b	a	a	b	a	a	b	a	b	b	a	b	a	a	a	b	b	b	a	b	a	a	a	b	a	b	a	a	b	a	b	a	a	a	a	b	a	a	b	b	b	a
CBBMR_12J04	a	b	a	a	b	b	a	b	a	b	a	a	a	b	a	a	b	b	a	a	b	a	a	a	b	a	b	a	b	a	b	a	a	a	a	b	b	b	b	a	a	b	a	b	b	a	b	b	a
CBBMR_13A04	a	b	a	a	a	a	b	b	b	a	b	a	a	a	b	a	b	a	b	a	a	b	b	b	b	a	a	b	b	b	a	a	b	a	a	b	b	a	b	a	a	a	b	a	a	b	a	a	b
CBBMR_13E15	a	b	a	a	b	b	a	b	a	b	a	a	b	b	a	a	b	b	a	a	b	a	a	a	b	a	b	a	b	a	b	a	a	a	a	b	b	b	-	a	a	b	a	b	b	a	b	b	a
CBBMR_13M23	a	b	a	b	b	a	a	a	b	b	a	a	b	b	b	b	a	a	b	b	b	a	a	b	b	a	b	a	b	b	b	b	a	b	a	b	a	a	b	b	a	a	a	a	b	b	b	b	a
CBBMR_13N08	a	a	b	b	a	b	b	a	a	b	b	a	a	b	b	b	b	b	a	a	b	b	b	b	b	b	a	a	a	a	a	a	b	b	b	a	b	a	b	a	b	b	a	a	a	b	a	b	b
CBBMR_13O05	a	a	b	b	a	a	b	a	a	a	b	a	a	a	b	a	a	b	b	b	b	b	a	b	b	a	a	b	b	b	b	a	b	b	a	b	b	b	b	b	a	b	a	a	b	b	a	a	b
CBBMR_13O22	a	b	b	a	a	b	b	b	a	a	b	b	b	b	b	b	b	b	a	a	a	b	a	b	b	a	a	a	a	a	a	b	a	a	b	a	b	a	a	a	b	a	b	a	a	a	a	a	b
CBBMR_13P16	b	a	a	a	a	b	a	b	b	a	b	a	a	b	b	a	b	a	a	a	a	a	a	a	b	b	b	b	b	b	a	a	a	b	a	b	a	b	a	b	b	b	a	b	b	b	b	a	a
CBBMR_14C18	a	b	a	b	b	a	a	a	b	b	a	a	b	b	b	b	a	a	b	b	b	a	a	b	b	a	b	a	b	b	b	b	a	b	a	b	a	a	b	b	a	a	a	a	b	b	b	b	a
CBBMR_14D07	b	b	a	a	b	a	a	a	b	a	a	b	b	-	b	b	b	a	b	b	a	b	a	a	b	b	a	a	b	b	a	a	b	a	b	a	a	b	a	b	b	a	b	a	a	b	a	b	a
CBBMR_14E05	b	b	a	a	b	b	b	a	b	a	b	b	a	a	a	b	a	b	a	b	b	b	a	a	a	a	b	a	a	a	b	a	b	a	b	a	a	a	b	b	a	a	b	a	a	b	b	b	a
CBBMR_14G17	b	b	a	a	b	a	a	a	b	a	a	b	b	a	b	b	b	a	b	b	a	b	a	a	b	b	a	a	b	b	a	a	b	a	b	a	a	b	a	b	b	a	b	a	a	b	a	b	a
CBBMR_14J04	b	b	b	b	b	a	b	a	b	b	a	a	a	b	a	b	b	b	b	a	a	b	a	b	a	a	a	b	b	b	b	a	a	b	b	b	b	b	a	a	b	b	a	a	b	a	a	a	b
CBBMR_14J14	a	a	b	b	a	a	a	b	a	a	b	a	a	b	a	b	b	a	b	a	a	a	b	b	b	a	b	a	a	a	b	a	b	a	a	b	a	b	a	a	a	a	b	a	a	b	b	b	a
CBBMR_14M22	a	a	a	a	a	b	b	a	b	b	b	b	a	a	a	b	a	a	b	a	a	b	a	b	b	b	b	a	a	b	b	b	b	b	a	a	b	b	a	a	b	b	a	b	a	a	a	b	b
CBBMR_14O07	a	a	b	b	a	a	b	a	b	a	b	a	a	a	b	a	a	b	b	b	b	b	a	b	b	b	a	b	b	b	b	a	a	b	a	b	b	b	b	b	a	b	a	a	a	b	a	a	b
CBBMR_14P08	a	b	a	b	b	a	b	a	b	a	a	a	a	b	a	b	b	b	b	a	a	b	a	b	b	a	a	b	b	b	b	b	b	b	b	b	b	b	a	a	b	b	a	a	b	a	a	b	b
CBBMR_15B01	a	a	b	b	a	a	b	a	b	a	b	a	a	a	b	a	a	b	b	b	b	b	a	b	b	b	a	b	b	b	b	a	a	b	a	b	b	b	b	b	a	b	a	a	a	b	a	a	b
CBBMR_15B17	b	a	b	a	b	a	b	b	a	a	b	a	b	b	b	a	b	b	a	a	a	b	a	b	a	a	b	a	a	a	a	a	a	a	a	b	b	a	a	b	a	b	a	b	a	b	b	b	a
CBBMR_15D08	a	b	a	a	b	b	a	b	a	b	a	a	a	b	a	a	b	b	a	a	b	-	a	a	b	a	b	a	b	a	b	a	a	a	a	b	b	b	b	a	a	b	a	b	b	a	b	b	a
CBBMR_15H01	a	a	b	a	a	b	b	b	a	a	b	b	b	b	b	b	b	b	a	a	a	b	a	b	b	a	a	a	a	a	a	b	a	a	b	a	b	a	a	a	b	a	b	a	a	a	a	a	b
CBBMR_15K01	a	b	b	a	b	a	a	a	b	a	b	b	b	a	b	a	b	b	a	a	a	b	a	b	b	a	b	a	a	a	b	a	b	b	b	b	b	a	b	b	b	a	a	b	b	a	a	b	a
CBBMR_15L03	a	b	b	a	b	a	a	a	b	a	b	a	b	b	a	a	b	a	a	a	a	b	a	a	b	a	b	a	b	a	b	a	b	b	a	b	b	a	b	b	b	a	a	a	b	a	b	b	a
CBBMR_15L23	a	b	a	a	b	b	a	b	a	b	a	a	a	b	a	a	b	b	a	a	b	a	a	a	b	a	b	a	b	a	b	a	a	a	a	b	b	b	b	a	a	b	a	b	b	a	b	b	a
CBBMR_15O14	b	b	a	a	a	a	a	a	a	a	b	b	b	a	a	a	a	b	a	b	a	a	a	a	b	b	a	b	b	a	b	b	a	b	b	b	b	a	b	b	b	a	a	a	a	a	b	a	b
CBBMR_15P19	a	a	a	a	b	b	b	b	a	b	a	a	a	a	a	b	a	b	a	a	a	a	b	b	b	b	a	b	b	a	a	a	b	b	a	a	a	a	b	a	a	b	b	b	a	b	-	b	a
CBBMR_16B03**	a	a	b	b	b	b	a	b	a	a	a	b	a	b	b	b	b	b	b	b	b	a	a	b	a	b	b	a	a	b	b	a	a	b	b	a	a	a	b	b	a	a	b	b	b	b	b	b	b
CBBMR_16B15	b	a	a	b	a	a	b	a	a	a	a	a	b	b	a	b	a	a	b	a	b	b	a	b	b	a	b	a	a	b	b	b	a	b	a	a	a	a	b	b	a	a	a	a	b	a	b	a	b
CBBMR_16B20	a	a	a	b	a	a	b	b	b	b	a	a	b	b	b	a	b	a	b	a	b	a	b	b	b	b	b	a	b	b	a	a	a	b	b	b	a	a	b	a	b	b	a	a	a	a	-	a	a
CBBMR_16K24	a	a	b	b	a	a	a	b	a	a	b	a	a	b	a	b	b	a	b	a	a	a	b	b	b	a	b	a	a	a	b	a	b	a	a	b	a	b	a	a	a	a	b	a	a	b	b	b	a
CBBMR_16M02	b	a	a	a	b	a	b	a	a	a	a	b	a	a	a	b	a	b	b	b	b	b	a	a	b	a	b	a	a	a	b	a	a	b	a	a	a	b	a	b	a	a	b	a	a	b	b	a	a
CBBMR_16N02	a	b	a	a	b	b	a	b	a	b	a	a	b	b	a	a	a	b	a	b	a	a	a	a	b	a	b	a	b	a	b	a	a	a	a	b	b	b	b	a	a	b	a	b	b	a	b	b	a
CBHMR_09D13	b	a	a	a	a	a	b	a	a	a	b	b	b	b	a	a	b	b	-	a	a	b	a	a	b	a	a	b	b	b	b	b	b	a	b	b	a	a	b	b	b	a	a	a	b	b	a	a	b
CBHMR_09D14	a	b	b	b	b	b	a	b	a	a	a	b	a	b	b	b	b	b	a	b	b	a	a	b	a	b	b	a	a	b	a	a	a	b	b	-	a	a	b	b	a	a	b	b	b	b	b	b	b
CBHMR_09F06	b	b	a	b	b	a	a	a	b	b	a	b	a	b	a	a	a	a	b	a	b	a	b	a	b	a	a	a	a	a	a	a	a	a	a	b	b	b	b	b	a	a	a	a	b	b	b	a	b
CBHMR_09F14*	a	a	a	b	a	b	a	b	b	b	b	a	a	a	b	b	b	b	a	a	b	b	b	b	a	b	b	a	a	b	a	b	a	b	b	a	b	a	b	b	a	b	a	b	a	b	b	b	b
CBHMR_09I05	a	b	b	b	b	b	a	b	a	a	a	b	a	b	b	b	b	b	a	b	b	a	a	b	a	b	b	a	a	b	a	a	a	b	b	a	a	a	b	b	a	a	b	b	b	b	b	b	b
CBHMR_09J13	a	a	a	b	a	b	b	a	b	b	b	a	a	b	b	b	b	b	a	a	b	b	b	b	a	b	b	a	a	b	a	a	a	b	b	a	b	a	b	b	a	b	a	b	a	b	b	b	b
CBHMR_09M03	a	b	b	b	a	a	b	b	b	a	a	a	a	b	a	a	b	b	a	b	a	b	a	a	b	a	a	b	a	a	b	b	a	a	b	b	a	a	b	b	a	b	a	b	b	a	a	b	a
CBHMR_09M13	a	b	a	a	b	b	a	a	b	a	b	a	a	b	b	b	b	b	a	b	b	b	a	b	a	a	b	a	b	b	a	b	b	a	b	b	a	a	b	a	b	b	b	a	a	b	b	a	b
CBHMR_10B06**	b	b	b	a	a	a	a	a	b	b	a	a	b	a	b	a	b	b	a	a	a	b	a	a	b	b	b	a	b	a	b	a	a	a	a	a	a	a	b	b	a	a	a	a	a	a	b	a	b
CBHMR_10B07	b	a	b	a	a	a	a	b	b	a	b	a	b	b	b	b	b	a	b	a	b	a	a	b	a	b	a	b	b	b	a	a	b	b	b	a	b	a	b	a	b	b	a	a	a	b	b	b	a
CBHMR_10E06	b	a	b	a	a	a	a	b	a	b	a	b	b	b	b	a	b	b	a	a	b	b	a	b	a	a	a	b	b	b	b	a	a	a	b	a	a	a	b	a	b	b	a	a	a	a	b	a	b
CBHMR_10G18	a	b	a	a	b	b	a	a	a	a	b	a	a	b	a	b	b	-	a	b	b	b	a	b	a	a	b	a	b	b	b	b	b	a	b	b	a	a	b	a	b	b	b	a	a	b	b	a	b
CBHMR_10H11	b	a	b	a	b	a	a	b	a	b	a	b	b	b	b	a	b	b	b	a	b	a	b	b	b	b	b	a	b	a	b	b	a	a	a	b	b	b	b	a	a	b	a	b	a	a	b	a	b
CBHMR_10I02**	a	b	a	a	a	a	b	a	a	a	a	a	a	b	a	b	a	a	a	b	b	b	a	a	a	b	a	a	a	a	a	a	a	a	a	a	a	a	a	a	b	a	b	b	a	-	a	b	a
CBHMR_10J13**	a	b	a	a	a	a	b	a	a	a	a	a	a	b	a	b	a	a	a	b	b	b	a	a	a	b	a	a	a	a	a	a	a	a	a	a	a	a	a	a	b	a	b	b	a	a	a	b	a
CBHMR_10P03	a	b	a	b	a	a	b	a	a	a	b	a	a	a	a	a	a	b	b	b	b	b	a	b	b	b	a	b	b	b	b	a	a	b	a	b	b	b	b	b	a	b	a	a	a	b	a	a	b
CBHMR_11E02	a	a	a	b	a	a	-	b	b	b	a	a	b	b	a	a	b	a	b	a	b	a	b	b	b	b	b	a	b	b	a	a	-	b	b	b	a	a	b	a	b	b	a	a	a	a	a	a	a
CBHMR_11E19	b	b	a	a	b	a	a	a	b	a	a	b	b	a	b	b	b	a	b	b	a	b	a	a	b	b	a	b	b	b	a	a	b	a	b	a	a	b	a	a	b	b	b	a	a	b	a	a	b
CBHMR_11E22	b	a	b	b	a	a	a	b	b	-	a	a	b	a	b	a	b	a	b	a	b	a	b	b	b	b	b	a	b	a	b	b	-	a	a	b	b	b	b	a	-	a	b	b	a	a	b	a	b
CBHMR_11F16	b	b	a	a	b	a	a	a	b	a	a	b	b	a	b	b	b	a	b	b	a	b	a	a	b	b	a	b	b	b	a	a	b	a	b	a	a	b	a	a	b	b	b	a	a	b	a	a	b
CBHMR_11H24	a	a	a	b	a	a	b	b	b	b	a	a	b	b	b	a	b	a	b	a	b	a	b	b	b	b	b	a	b	b	a	a	a	b	b	b	a	a	b	a	b	b	a	a	a	a	a	a	a
CBHMR_11I11	a	a	b	a	a	b	b	b	-	a	b	b	a	b	b	b	b	b	a	a	a	b	a	b	b	a	a	a	a	a	a	b	b	a	b	a	b	a	a	a	b	a	b	b	a	a	a	a	b
CBHMR_11I20	b	a	a	a	b	a	a	a	b	a	a	b	b	a	b	b	b	a	b	b	a	b	a	a	b	b	a	a	b	b	a	a	b	a	b	a	a	b	a	b	b	a	b	a	a	b	a	b	a
CBHMR_11I23****	b	b	b	a	b	a	b	b	b	b	-	a	b	b	b	a	b	b	a	a	a	b	b	b	b	b	b	a	b	a	b	a	b	a	a	-	b	a	b	b	a	a	a	b	a	b	b	b	b
CBHMR_12B09	a	b	a	a	b	b	a	a	b	a	b	a	a	b	b	b	b	b	a	b	b	b	a	-	a	a	b	a	b	b	a	b	b	a	b	b	a	a	b	a	b	b	b	a	a	b	b	a	b
CBHMR_12E16	a	b	a	a	b	b	a	b	b	b	a	a	a	b	a	a	b	a	b	a	b	a	a	a	b	a	b	a	b	a	b	a	b	a	a	b	b	b	b	a	a	b	a	b	b	a	b	b	a
CBHMR_12H11	b	a	a	b	b	a	b	b	b	a	b	a	b	a	a	b	a	b	a	b	a	b	a	b	b	b	a	b	a	b	a	b	a	a	a	b	b	a	b	b	b	b	a	a	a	a	b	b	a
CBHMR_12K23*****	b	b	b	a	b	a	b	b	b	b	b	a	b	b	b	a	b	b	a	a	a	b	b	b	b	b	b	a	b	a	b	a	b	a	a	b	b	a	b	b	a	b	a	b	a	b	b	b	b
CBHMR_12L06	a	a	b	b	a	a	b	a	a	a	b	a	a	b	b	b	b	b	a	a	b	b	b	b	a	b	a	b	a	a	a	a	a	b	b	a	b	a	b	b	a	a	a	b	a	b	b	b	b
CBHMR_12M18	b	a	b	a	b	a	a	b	a	b	a	b	b	b	b	-	b	b	b	a	b	a	b	b	b	b	b	a	b	a	b	b	a	-	a	b	b	b	b	a	-	b	a	b	a	a	b	a	b
CBHMR_12O06	b	b	a	a	b	a	a	a	b	a	a	b	b	a	b	b	b	a	b	b	a	b	a	a	b	b	a	b	b	b	a	a	b	a	b	a	a	b	a	a	b	b	b	a	a	b	a	a	b
CBHMR_12O07	b	b	b	b	b	a	b	a	b	b	b	a	a	a	b	b	a	b	b	a	b	a	b	b	a	a	a	b	b	b	b	a	b	b	b	a	a	a	a	b	b	b	a	b	b	a	a	a	b
CBHMR_12O11	a	b	b	a	a	b	b	b	a	b	b	a	b	b	b	b	b	b	a	a	a	a	a	b	b	a	a	a	a	a	b	b	a	b	b	a	b	a	a	a	b	a	b	a	a	a	b	a	b
CBHMR_12P05	a	a	b	b	a	a	-	a	b	a	b	a	a	a	b	a	a	b	b	b	b	b	a	-	b	b	a	b	b	b	b	a	a	-	a	b	b	-	b	b	a	b	a	a	a	b	a	a	b
CBHMR_12P18	b	b	a	a	b	a	a	a	b	a	a	b	b	a	b	b	b	a	b	b	a	b	a	a	b	b	a	b	b	b	a	a	b	a	b	a	a	b	a	a	b	b	b	a	a	b	a	a	b
CBHMR_13C17	a	b	-	a	b	b	a	b	a	b	a	a	a	b	a	a	b	b	a	a	b	a	a	a	b	a	b	a	b	a	b	a	a	a	a	b	b	b	b	a	a	b	a	b	b	a	b	b	a
CBHMR_13C20	b	a	b	b	a	a	a	b	b	-	a	a	b	a	b	a	b	-	b	a	b	a	b	b	b	b	b	a	b	a	b	b	a	a	-	b	b	b	b	a	a	a	b	b	a	a	b	a	b
CBHMR_13D12	b	a	a	a	a	b	b	b	a	a	b	b	a	a	a	b	a	b	a	a	a	b	a	b	b	b	b	a	a	a	b	b	b	b	-	a	b	b	a	b	b	a	a	b	a	a	a	a	b
CBHMR_13F09	a	b	a	b	b	a	b	a	b	b	a	b	a	b	a	b	a	a	b	a	a	b	a	a	b	a	b	a	b	b	b	b	b	b	b	a	b	b	a	a	b	b	a	a	b	a	a	b	b
CBHMR_13F13	a	a	a	a	a	a	b	b	a	a	b	b	b	b	b	a	b	b	a	a	a	b	a	a	b	a	a	b	b	b	b	b	b	a	b	b	a	a	b	b	b	a	a	a	b	b	a	a	b
CBHMR_13G21*	a	a	a	b	a	a	b	a	a	a	b	a	a	a	a	a	a	b	b	b	b	b	a	b	b	-	b	a	-	a	-	a	a	b	a	b	b	b	b	b	a	b	a	a	a	a	a	a	b
CBHMR_13J08	a	b	a	a	b	b	a	a	b	a	b	a	a	a	b	b	b	b	a	b	b	b	a	b	a	a	b	a	b	b	a	b	b	a	b	b	a	a	b	a	b	b	b	a	a	b	b	a	b
CBHMR_13K14	a	b	b	b	a	a	b	b	b	a	a	a	a	b	-	a	b	b	a	b	a	b	a	a	b	a	a	b	a	a	b	b	a	a	b	b	a	a	b	b	a	b	a	b	b	a	a	b	a
CBHMR_13M05	a	b	b	a	b	a	a	a	b	a	b	a	b	b	b	a	b	a	a	a	a	b	a	a	b	a	b	a	b	a	b	a	b	b	a	b	b	a	b	b	b	a	a	a	b	a	b	b	a
CBHMR_13M12	b	a	a	a	a	a	b	a	a	a	a	a	b	b	b	b	-	a	b	a	b	b	a	b	b	-	b	a	-	b	b	-	-	b	a	a	a	a	b	b	-	a	a	a	b	a	b	a	b
CBHMR_13N15**	b	b	b	a	a	a	a	a	b	b	a	a	b	a	b	a	b	b	a	a	a	b	a	a	b	b	b	a	b	a	b	a	a	a	a	a	a	a	b	b	a	a	a	a	a	a	b	a	b
CBHMR_13P11	a	a	b	b	a	a	b	a	b	-	b	a	a	a	b	a	a	b	b	b	b	b	a	b	b	b	a	b	b	b	b	a	a	b	-	b	b	b	b	b	a	b	a	a	a	b	a	a	b
CBHMR_13P14	a	a	a	b	a	a	b	b	b	b	a	a	b	b	a	a	b	a	b	a	b	a	b	b	b	b	b	a	b	b	a	a	a	b	b	b	a	a	b	a	b	b	a	a	a	a	a	a	a
CBHMR_14D22	a	b	-	a	a	b	b	b	a	-	b	b	b	b	b	b	b	b	a	a	a	a	a	b	b	a	a	a	a	a	b	b	a	a	b	a	b	a	a	a	b	a	b	a	a	a	a	a	b
CBHMR_14F15	a	b	a	a	b	b	a	a	a	a	b	a	a	b	a	b	b	b	a	b	b	b	a	b	a	a	b	a	b	b	b	b	b	a	b	b	a	a	b	a	b	b	b	a	a	b	b	a	b
CBHMR_14H18**	a	b	a	a	a	a	b	a	a	a	a	a	a	b	a	b	a	a	a	b	b	b	a	a	a	b	a	a	a	a	a	a	a	a	a	a	a	a	a	a	b	a	b	b	a	a	a	b	a
CBHMR_14L10	b	b	b	b	b	a	b	a	a	b	b	a	a	a	b	b	a	b	b	a	a	a	-	b	a	a	a	b	b	a	b	a	a	a	b	a	a	b	a	b	b	b	a	b	b	a	a	b	b
CBHMR_14N06	a	a	b	a	a	b	a	b	b	a	b	a	a	b	b	a	a	b	a	a	b	a	a	b	a	a	a	a	a	b	b	b	a	a	b	a	a	b	b	a	b	a	b	b	a	b	a	a	a
CBHMR_14N08	b	a	b	b	a	a	a	b	b	b	a	a	b	a	b	a	b	a	b	a	b	a	b	b	b	b	b	a	b	a	b	b	a	a	a	b	b	b	b	a	a	a	b	b	a	a	b	a	b
CBHMR_14N21	a	b	b	a	b	a	-	a	a	a	b	b	b	a	b	a	b	b	a	a	a	b	a	b	b	a	b	a	a	a	b	a	b	b	b	b	b	a	b	b	b	a	a	b	a	a	a	b	a
CBHMR_15A14	a	b	a	b	b	a	b	a	b	b	a	b	a	b	a	b	a	a	b	a	a	b	a	a	b	a	b	a	b	b	b	b	b	b	b	a	b	b	a	a	b	b	a	a	b	a	a	b	b
CBHMR_15D02	b	a	a	b	a	a	a	a	b	b	a	a	a	a	-	a	b	a	b	a	a	a	b	b	b	b	b	a	b	a	b	b	a	a	b	b	b	b	b	a	a	a	b	b	a	a	a	a	b
CBHMR_15D24	a	a	a	a	a	b	a	b	b	a	b	a	a	a	b	b	b	a	b	a	b	a	b	b	a	a	b	a	a	b	a	b	a	-	a	b	b	a	-	b	a	b	a	b	a	b	b	b	b
CBHMR_15F11	-	b	b	a	b	a	a	a	b	-	b	a	b	b	a	a	b	a	a	a	a	b	a	a	b	a	b	a	b	a	b	-	b	b	-	b	b	a	b	b	b	a	a	a	b	a	b	b	a
CBHMR_15G12	a	a	b	b	a	a	b	a	b	a	b	a	a	a	b	a	a	b	b	b	b	b	a	b	b	b	a	b	b	b	b	a	a	b	a	b	b	b	b	b	a	b	a	a	a	b	a	a	b
CBHMR_15H04	a	b	b	b	b	a	b	a	a	a	b	b	b	a	b	a	b	b	a	a	a	b	a	b	b	a	b	a	a	a	b	a	a	b	b	b	b	a	b	b	b	a	a	b	a	a	a	b	a
CBHMR_15K10	b	a	a	a	b	a	b	a	a	a	a	b	a	a	a	b	a	b	b	b	b	b	a	a	b	a	b	a	a	a	b	a	a	b	a	a	a	b	a	b	a	a	b	a	a	b	b	a	a
CBHMR_15L18	a	a	b	a	a	a	a	b	b	a	b	a	a	a	b	b	b	b	a	a	a	b	b	a	b	b	b	a	a	b	b	a	a	b	a	a	a	a	a	b	a	a	b	b	a	b	a	b	b
CBHMR_15N16	a	a	b	a	a	b	b	b	a	a	b	b	b	b	b	b	b	b	a	a	a	b	a	b	b	a	a	a	a	a	a	b	a	a	b	a	b	a	a	a	b	a	b	a	a	a	a	a	b
CBHMR_16D01	b	a	b	a	b	a	b	b	a	a	b	a	b	b	b	a	b	b	a	a	a	b	a	b	a	a	b	a	a	a	a	a	a	a	a	b	b	a	a	b	a	b	a	b	a	b	b	b	a
CBHMR_16D21*	a	a	b	a	a	b	b	b	a	a	b	b	b	b	b	b	b	b	a	a	a	b	a	b	b	a	a	a	a	a	a	b	a	a	b	a	-	a	a	a	b	a	b	a	a	a	a	a	b
CBHMR_16E04	a	b	b	b	a	a	b	b	b	a	a	a	a	-	a	a	-	-	a	b	a	b	a	a	b	a	a	b	a	a	b	b	a	a	-	b	a	a	b	b	a	b	a	b	b	a	a	b	a
CBHMR_16F17	b	a	b	a	b	a	a	b	a	b	a	a	b	-	b	a	b	b	b	a	b	a	b	b	b	b	b	a	b	a	b	b	a	a	a	b	b	b	b	a	a	a	b	b	a	a	b	a	b
CBHMR_16G06	a	a	b	a	a	b	b	b	a	a	b	b	a	b	b	b	b	b	a	a	a	b	a	b	b	a	a	a	a	a	a	b	b	a	b	a	b	a	a	a	b	a	b	b	a	a	a	a	b
CBHMR_16H17	a	b	b	b	a	a	b	b	b	a	a	a	a	b	b	a	b	b	a	a	a	b	a	a	b	a	a	b	a	a	b	b	a	a	b	b	a	a	b	a	a	b	b	b	b	a	a	b	a
CBHMR_16K21	b	a	a	a	a	a	b	a	a	a	a	a	b	b	a	b	a	a	b	a	b	b	a	b	b	a	b	a	a	b	b	b	-	b	a	a	a	a	b	b	a	a	a	a	b	a	b	a	b
CBHMR_16L14*	b	b	b	a	a	a	a	a	b	b	a	a	b	-	b	a	b	b	a	a	a	b	a	-	b	b	b	a	b	a	b	a	a	a	a	a	a	a	b	b	a	a	a	a	a	a	b	a	b
CBHMR_16M17	b	b	b	b	b	a	b	a	b	b	b	a	a	a	b	b	a	b	b	a	b	a	b	b	a	a	a	b	b	b	b	a	b	b	b	b	a	a	a	b	b	b	a	b	b	a	a	a	b
CBHMR_16N16	b	b	b	b	a	a	a	b	b	a	b	a	b	a	b	a	b	b	a	a	b	b	a	b	b	a	a	b	b	a	b	a	a	a	a	b	b	a	b	a	b	b	b	a	b	a	a	a	a
CBHMR_16O12	a	a	b	a	a	b	b	b	a	a	b	b	a	b	b	b	b	b	a	a	a	b	a	b	b	a	a	a	a	a	a	b	b	a	b	a	b	a	a	a	b	a	b	b	a	a	a	a	b
CBHMR_16P06	a	b	b	b	b	b	a	b	-	a	a	b	a	b	b	b	b	b	a	b	b	a	a	b	a	b	b	a	a	b	a	a	a	b	b	a	a	a	b	b	a	a	b	b	b	b	b	b	b
CBHMR_16P23	b	a	b	b	a	a	a	b	b	b	a	a	-	a	b	a	b	a	b	a	b	a	b	b	b	b	b	a	b	a	b	b	a	a	a	b	b	b	b	a	a	a	b	b	a	a	b	a	b
CBMR_13A17	a	a	b	a	a	a	a	b	a	b	a	b	b	b	b	b	b	a	a	a	a	a	-	a	a	b	a	a	a	a	a	b	b	a	a	b	a	b	a	a	-	a	a	-	a	b	b	a	a
CBMR_15A02	a	b	a	a	a	a	b	b	b	b	b	a	a	a	a	b	a	b	b	a	a	b	b	b	b	a	b	a	a	a	b	b	b	a	b	a	b	a	a	a	b	a	b	a	a	a	-	a	b
Cgca-0004	b	a	a	b	a	a	b	a	a	a	b	a	b	b	a	b	a	a	b	b	b	a	a	b	b	a	b	a	b	a	b	b	a	b	a	b	b	b	a	b	a	-	b	a	a	a	b	a	a
CHMR_09B06	b	a	b	b	b	b	a	b	a	a	-	a	b	b	a	b	b	a	a	a	a	a	a	a	b	b	a	a	a	a	a	a	b	a	b	a	a	a	-	a	b	a	a	a	b	b	b	a	b
CHMR_09D04	b	a	b	b	b	b	a	b	a	a	b	a	b	b	a	b	b	a	a	a	a	a	a	a	b	b	a	a	a	a	a	a	b	a	b	a	a	a	b	a	b	a	a	a	b	b	b	a	b
CHMR_09K21	b	b	a	a	b	b	b	a	b	a	b	b	a	a	a	b	a	b	a	b	b	b	a	a	a	a	b	a	a	a	b	a	b	a	b	a	a	a	b	b	a	a	b	a	a	b	b	b	a
CHMR_10D17	b	a	b	b	b	b	a	b	a	a	b	a	b	b	a	b	b	a	a	a	a	a	a	a	b	b	a	a	a	a	a	-	-	a	b	a	a	a	-	a	b	a	a	a	-	b	b	a	b
CHMR_12F23	a	a	b	a	a	a	a	b	a	b	a	b	b	b	b	b	b	a	a	a	a	a	a	a	a	b	a	a	a	a	a	b	b	a	a	b	a	b	a	a	b	a	a	b	a	b	b	a	a
CHMR_12J15	b	a	b	b	b	-	a	b	a	a	b	a	b	b	a	b	b	a	a	a	a	a	a	a	b	b	a	a	a	a	a	a	b	a	b	a	a	a	b	a	b	a	a	a	b	b	b	a	b
CHMR_12L22	a	b	-	a	a	a	b	b	b	b	b	a	a	a	a	b	a	b	b	a	a	b	b	b	b	a	b	a	a	a	b	b	b	a	b	a	b	a	a	a	b	a	b	a	a	a	b	a	b
CHMR_13D06	b	a	b	b	b	-	a	b	a	a	b	a	b	b	a	b	b	a	a	a	a	a	a	a	b	b	a	a	a	a	a	a	b	a	b	a	a	a	b	a	b	a	a	a	b	b	b	a	b
CHMR_13O04	b	a	b	b	b	b	a	b	a	a	b	a	b	b	a	b	b	a	a	a	a	a	a	a	b	b	a	a	a	a	a	a	-	a	b	a	a	a	b	a	b	a	a	a	b	b	b	a	-
CHMR_13O19**	a	a	b	a	a	a	a	b	a	b	a	b	b	-	b	b	-	a	a	a	a	a	a	a	a	b	a	a	a	a	a	b	-	a	a	b	a	b	a	a	-	a	a	b	a	b	-	a	a
CHMR_13P21	b	a	b	a	b	a	a	b	a	b	a	b	b	b	b	a	b	b	b	a	b	a	b	b	b	b	b	a	-	a	b	b	a	a	a	b	-	b	b	a	a	b	a	b	a	a	b	a	b
CHMR_14L04	b	a	b	a	b	a	a	b	a	b	a	b	b	b	b	a	b	b	b	a	b	a	b	b	b	b	b	a	b	a	b	b	a	a	a	b	b	b	b	a	a	b	a	b	a	a	b	a	b
CMAT	a	b	-	a	a	a	a	b	b	-	a	-	b	b	b	a	b	b	a	a	a	-	b	a	b	b	a	a	b	-	b	a	b	a	a	-	a	a	-	b	a	a	a	a	a	a	-	a	b
CSTIE3	a	a	b	a	a	a	a	b	a	b	b	a	a	a	a	b	a	a	a	b	b	a	b	a	b	b	a	b	a	a	b	b	a	b	a	b	a	b	b	b	b	-	a	a	b	b	b	b	a
ct-0005	a	b	b	a	b	a	a	a	b	a	b	b	b	a	b	a	b	b	a	a	a	b	a	b	b	a	b	a	a	a	b	a	b	b	b	b	b	a	b	b	b	a	a	b	b	a	a	b	a
Ctcc-0006	b	a	a	b	a	a	b	a	a	a	b	a	b	b	a	b	a	a	b	a	b	b	a	b	b	a	b	a	a	a	b	b	a	b	a	a	a	a	-	b	a	-	b	a	a	a	b	a	a
gaa-0001	a	b	b	b	a	a	b	b	-	a	a	-	a	b	b	a	b	b	a	a	a	b	a	a	b	a	a	a	a	a	b	b	a	a	b	b	a	a	b	a	a	-	b	b	b	a	a	b	-
gaa-0004	b	a	b	b	b	b	a	b	-	a	b	-	b	b	a	b	b	a	a	a	a	a	a	a	b	b	a	a	a	a	a	a	b	a	b	a	a	a	b	a	b	-	a	a	b	b	b	a	-
gca-0007	b	a	a	b	a	a	b	a	a	a	b	a	b	a	a	b	a	a	b	b	b	a	a	b	b	a	b	a	b	a	b	b	a	b	a	b	b	b	a	b	a	a	b	a	-	a	b	a	a
gca-0008	b	a	b	a	a	a	a	b	a	b	a	b	b	b	b	a	b	b	a	a	b	b	a	b	a	a	a	b	b	b	b	a	a	a	b	a	a	a	b	a	b	b	a	a	a	a	b	a	b
gca-0010	a	a	a	a	b	b	b	b	a	a	b	a	a	b	b	b	a	b	b	a	a	a	b	b	a	a	a	b	b	a	a	b	a	b	b	a	b	a	a	a	a	b	b	b	a	b	b	b	a
gga-0001	b	a	a	a	a	a	a	b	b	a	b	b	b	b	b	b	b	a	b	a	-	b	a	b	b	b	a	b	a	a	-	-	a	a	a	a	b	b	a	a	a	-	b	a	b	b	a	b	b
ggc-0001	b	a	b	a	b	a	a	b	a	b	a	b	b	b	b	a	b	b	b	a	b	a	b	b	b	b	b	a	b	a	b	b	a	a	a	b	b	b	b	a	a	a	b	b	a	a	b	a	b
ggc-0003A	b	a	b	b	b	b	a	b	-	a	b	-	b	b	a	b	b	a	a	a	a	a	a	a	b	b	a	a	a	a	a	a	b	a	b	a	a	a	b	a	b	-	a	a	b	b	b	a	-
ggc-0003B	a	b	b	b	b	a	b	a	-	a	b	-	b	a	b	a	b	b	a	a	a	b	a	b	a	a	b	a	a	a	b	a	a	b	b	b	b	a	b	b	b	-	a	b	a	a	a	b	-
STIB3	a	b	a	b	a	a	b	-	-	a	b	-	a	a	b	b	a	b	b	b	b	b	a	b	b	b	a	b	b	b	b	a	a	b	a	b	b	b	b	b	a	-	a	a	a	b	a	a	-
tcc-0005	a	a	a	b	b	a	b	a	-	b	b	-	a	b	a	b	a	a	b	a	a	b	a	b	b	b	b	a	a	b	b	b	b	b	b	b	a	a	a	a	b	-	a	b	a	a	a	b	-
tcc-0008	a	b	a	a	b	b	a	b	a	b	a	a	a	b	a	a	b	b	a	a	b	a	a	a	b	a	b	a	b	a	b	a	a	a	a	b	b	b	b	a	a	b	a	b	b	a	b	b	a
tcc-0009	a	a	b	b	a	a	a	b	a	b	b	a	a	b	a	b	b	b	a	a	a	a	b	b	a	b	b	a	a	a	b	a	b	a	a	b	a	b	a	a	a	-	b	a	a	b	a	b	a
Virulence	b	a	b	a	b	b	b	a	b	b	a	b	b	b	b	b	a	b	a	b	b	a	a	a	a	a	a	a	a	a	b	a	b	a	a	b	b	a	b	a	a	a	b	a	a	b	a	a	b
[truncated: 11 more columns]

## Sheet: Cross IPO323 x IPO95052
Loci 323/95052	1104	1107	1108	1110	1111	1114	1116	1117	1118	1120	1121	1122	1123	1124	1125	1127	1128	1129	1131	1136	1137	1138	1139	1141	1144	1146	1147	1148	1149	1150	1151	1152	1155	1157	1158	1159	1160	1163	1164	1165	1166	1167	1168	1169	1170	1171	1172	1173	1174
CABMR_01A17	a	b	b	b	b	a	b	b	a	a	b	b	b	a	a	a	a	a	a	a	a	a	a	b	a	b	a	b	b	a	b	a	a	b	b	a	b	b	b	b	b	a	b	a	a	b	b	a	b
CABMR_01B03	a	b	a	a	a	b	a	b	b	a	b	b	a	b	b	a	b	b	b	a	b	a	b	a	b	b	b	a	-	b	b	b	a	a	b	a	b	b	a	b	a	a	a	-	b	b	a	b	b
ABMR_01B08	a	b	a	b	b	a	a	b	a	a	a	a	b	a	a	a	b	b	a	a	b	b	b	b	a	b	a	b	a	a	a	a	a	b	b	a	a	b	b	b	b	a	a	a	b	b	b	b	b
ABMR_01B24	a	b	a	b	b	b	a	b	a	b	b	b	b	b	b	a	b	b	b	a	a	a	b	a	b	a	a	a	a	b	a	a	a	a	a	b	b	a	a	b	b	a	b	b	a	b	b	a	a
ABMR_01C07	b	a	a	a	a	a	a	b	a	b	b	a	b	a	a	a	a	b	b	b	a	b	b	a	a	b	a	a	a	b	b	b	b	b	a	b	b	a	a	a	b	b	a	a	b	a	a	b	b
CABMR_01C12	b	a	b	a	a	b	a	a	b	a	a	a	a	b	b	b	b	a	a	b	a	b	b	b	a	b	b	a	a	b	b	b	b	b	a	a	b	b	a	b	b	a	a	b	b	b	a	a	b
ABMR_01C21	a	a	a	b	a	b	a	a	a	a	a	b	b	a	a	a	a	a	a	b	a	b	b	b	a	b	b	b	b	a	b	b	b	b	b	b	a	a	b	a	b	a	a	a	b	a	b	a	b
CABMR_01C24	a	a	b	b	b	a	a	a	b	b	a	a	a	b	b	a	b	b	b	a	b	b	b	b	b	a	b	b	b	b	a	b	a	a	a	b	a	b	b	a	a	b	b	b	a	b	b	a	a
CABMR_01E01	b	b	a	a	b	b	a	a	b	b	b	a	b	a	b	a	b	b	a	a	b	b	b	b	b	a	b	b	a	a	b	b	b	b	b	a	b	a	b	a	a	b	a	b	b	a	a	b	b
CABMR_01E02****	b	b	a	b	a	b	b	a	a	a	b	b	a	b	a	b	a	a	b	b	b	b	a	b	b	a	b	a	-	b	b	b	b	b	b	b	b	b	b	b	b	a	-	b	b	b	a	a	a
CABMR_01E03	b	b	b	b	a	b	a	a	b	b	b	a	a	b	b	a	a	b	a	b	b	b	a	b	b	a	a	a	a	a	b	a	a	a	a	a	a	b	a	a	-	a	b	a	a	a	b	a	a
ABMR_01F05	b	b	a	a	b	a	a	a	b	a	b	a	b	a	b	a	b	b	a	a	b	a	b	b	b	a	-	b	a	a	b	b	b	a	b	a	b	a	-	a	a	b	b	b	a	a	b	b	b
ABMR_01F24	a	a	a	b	a	a	b	a	a	b	a	a	-	a	a	a	a	a	a	b	a	a	a	a	a	b	a	a	a	b	a	a	b	a	b	b	b	b	b	a	b	b	b	b	a	b	b	a	b
ABMR_01G02	b	a	a	a	a	a	a	b	a	b	b	a	b	a	a	a	a	b	b	b	a	b	b	a	a	b	a	a	a	b	b	b	b	b	a	b	b	a	a	a	b	b	a	a	b	a	a	b	b
ABMR_01H12	b	a	a	b	b	a	b	b	a	a	b	b	b	a	a	b	b	b	a	a	a	a	a	b	b	b	a	b	b	a	a	a	b	b	a	b	a	a	b	b	b	a	a	a	a	a	b	b	a
ABMR_01I07	a	b	a	b	a	b	a	a	a	b	b	a	a	-	b	b	b	b	a	b	b	b	a	b	b	a	a	a	a	a	b	b	b	a	b	b	b	b	b	a	a	b	a	b	b	a	b	b	b
ABMR_01I09	b	b	b	b	b	a	b	a	b	b	a	a	a	b	a	b	b	a	a	a	a	a	b	b	a	b	a	b	-	a	b	b	a	-	b	a	a	b	b	b	b	a	a	a	b	a	b	b	a
ABMR_01I19	a	a	a	b	a	b	b	a	b	b	b	b	a	b	b	a	a	a	a	b	a	b	b	b	a	b	b	b	a	a	b	b	b	b	b	b	a	a	b	a	b	b	a	a	a	a	a	b	a
ABMR_01J15	a	a	b	b	a	b	a	b	b	a	b	b	a	b	a	a	b	b	a	a	b	b	a	a	b	a	b	a	b	a	b	b	a	b	b	a	a	a	a	b	b	a	a	a	b	b	-	b	a
ABMR_01J17	a	b	b	a	a	a	b	b	a	b	a	b	a	b	b	a	b	b	b	a	b	a	a	b	b	a	a	b	b	a	a	b	b	b	b	a	b	a	b	b	b	a	a	a	b	a	b	b	a
CABMR_01K07	b	b	b	b	a	a	a	b	b	b	a	b	b	b	b	a	b	a	b	b	a	a	b	a	a	b	b	b	b	b	b	a	a	b	b	a	a	b	b	a	a	b	b	b	a	b	b	a	a
ABMR_01K10*	a	b	b	b	b	a	a	b	a	a	b	a	b	b	b	a	b	a	b	b	b	b	a	b	b	b	b	b	a	b	a	a	b	b	a	b	b	a	a	b	a	b	b	b	a	a	b	b	a
ABMR_01K14	a	b	a	b	b	a	b	b	a	b	a	a	b	a	a	a	a	b	b	b	b	b	b	b	a	b	b	b	b	a	b	a	a	b	a	a	a	a	a	a	b	b	b	a	a	a	a	b	b
CABMR_01K22	a	b	a	b	b	a	a	b	a	a	a	a	b	b	a	a	b	b	a	a	b	b	b	b	a	b	a	b	a	a	a	a	a	b	b	a	a	b	b	b	b	a	a	a	b	b	b	b	b
ABMR_01L03	a	b	b	a	a	b	a	b	b	a	b	b	a	b	b	a	b	b	b	a	b	a	b	-	b	b	b	-	b	a	b	b	a	a	b	a	b	b	a	b	a	a	a	a	b	b	a	b	b
CABMR_01L15	b	a	b	b	b	b	a	b	a	b	a	a	a	a	b	-	a	a	a	a	b	a	b	b	a	b	b	a	a	a	b	a	a	b	b	a	b	a	b	b	a	a	a	b	a	a	b	b	a
ABMR_01M01	b	b	a	b	b	b	a	a	a	a	b	a	b	b	a	b	a	a	b	b	b	b	a	b	b	b	a	a	a	b	b	a	b	b	a	b	b	b	a	b	b	a	a	a	a	a	a	a	a
CABMR_01M07	a	a	b	b	b	a	b	a	b	b	a	a	a	b	b	a	b	b	b	a	b	b	b	b	b	a	b	b	b	b	a	b	a	a	a	b	b	b	b	a	a	b	b	b	a	b	b	a	a
ABMR_01M15	a	b	a	b	b	a	b	b	a	b	a	a	a	a	a	a	b	b	b	b	a	b	a	b	a	b	b	b	a	a	b	a	a	-	a	a	a	a	a	a	b	b	a	a	b	b	b	b	b
CABMR_01N02	a	a	-	b	a	b	a	a	a	a	a	b	b	a	a	a	a	a	a	b	a	b	b	b	a	b	b	b	b	a	b	b	b	b	b	b	a	a	b	a	b	a	a	a	-	a	b	a	b
ABMR_01O03	b	b	b	a	a	b	b	a	b	a	a	a	a	b	b	b	b	a	a	b	a	a	b	b	a	b	b	a	b	a	b	a	a	-	a	a	b	b	a	b	b	a	a	b	b	b	a	a	b
ABMR_01O07**	a	b	b	b	b	a	a	b	a	a	b	a	b	b	b	a	b	a	b	b	b	b	a	b	b	b	-	b	a	b	a	a	b	b	a	b	b	a	a	b	a	b	b	b	a	-	b	b	a
CABMR_01O17	a	a	a	b	a	b	a	a	a	a	a	b	b	a	a	a	a	a	a	b	a	b	b	b	a	b	b	b	b	a	b	b	b	b	b	b	a	a	b	a	b	a	a	a	b	a	b	a	b
CABMR_01O19	a	a	a	b	b	b	a	b	b	b	a	b	b	a	b	a	a	a	a	b	a	a	b	a	b	b	b	a	a	b	b	a	b	-	b	b	a	b	a	a	b	b	b	b	b	a	b	a	b
CABMR_01O20	b	b	b	b	a	b	a	a	b	b	b	a	a	b	b	a	a	b	a	b	b	b	a	b	b	a	a	a	a	a	b	a	a	a	a	a	a	-	a	a	b	a	b	a	a	a	b	a	a
ABMR_01P07	a	a	b	b	b	a	a	a	b	b	a	a	a	b	b	b	b	b	b	a	b	b	b	b	b	a	b	b	-	b	a	b	a	a	a	b	a	b	b	a	a	b	b	b	a	b	b	a	a
ABMR_01P10	a	b	a	a	b	b	a	b	a	b	b	a	b	b	b	b	b	a	b	a	a	a	b	b	a	b	a	b	a	a	b	a	a	a	a	b	b	a	a	a	a	b	b	b	a	a	a	a	a
CABMR_02A02	a	b	b	b	b	a	b	b	a	a	a	b	b	b	a	a	a	a	a	a	a	b	a	b	a	b	b	a	a	a	b	a	a	b	b	a	b	b	b	b	b	a	b	a	b	b	b	a	b
ABMR_02A04	a	b	a	a	a	b	a	b	b	a	b	b	a	b	b	a	b	b	b	a	b	a	b	a	b	b	b	a	b	b	b	b	a	a	b	a	b	b	a	-	a	a	a	a	b	b	a	-	b
CABMR_02D17	a	b	b	a	a	b	b	b	b	b	a	b	a	b	b	a	a	b	a	a	a	a	a	a	a	b	a	b	a	b	b	b	a	b	a	b	b	b	b	b	b	a	b	b	a	a	b	b	b
CABMR_02D21	a	a	a	a	b	b	a	a	b	b	a	a	a	a	b	-	b	a	b	b	a	b	b	b	b	b	b	b	a	a	b	a	b	a	a	b	a	b	b	b	a	b	a	b	b	a	b	a	a
ABMR_02E22*	a	b	b	b	b	a	a	b	a	a	b	a	b	b	b	a	b	a	b	b	a	b	a	b	b	b	b	b	a	b	a	a	b	b	a	b	b	a	a	b	a	b	b	b	a	a	b	b	a
CABMR_02F10	a	a	b	b	b	a	b	a	b	b	a	a	a	b	b	a	b	b	b	a	b	b	b	b	b	a	b	b	b	b	a	b	a	a	a	b	b	b	b	a	a	b	b	b	a	b	b	a	a
ABMR_02F13	a	a	a	b	a	a	b	a	a	b	a	a	b	a	a	a	a	a	a	b	a	a	a	a	a	b	a	a	a	b	a	a	b	a	b	b	b	b	b	a	b	b	b	b	a	b	b	a	b
CABMR_02F15	a	b	a	a	b	b	b	b	b	a	a	b	b	a	b	b	b	a	b	b	a	a	a	a	a	b	a	b	b	b	a	b	a	b	a	a	a	b	a	a	b	a	b	b	b	a	b	a	b
ABMR_02I18	a	a	a	a	a	b	a	b	b	a	b	a	a	a	b	a	a	a	b	b	a	b	a	b	b	a	a	b	b	b	a	b	a	a	b	b	b	a	b	a	a	b	b	b	a	a	b	a	a
CABMR_02J08	a	b	a	a	a	b	a	b	b	a	b	b	a	b	b	a	b	b	b	a	b	a	b	a	b	b	b	a	b	b	b	b	a	a	b	a	b	b	a	b	a	a	a	a	a	b	a	b	b
ABMR_02L14	b	b	b	a	a	b	b	a	b	a	a	a	a	b	b	b	b	a	a	b	a	a	b	b	a	b	b	a	b	a	b	a	a	b	a	a	b	b	a	b	b	a	a	b	b	b	a	a	b
ABMR_02L22	a	b	b	b	b	b	a	b	a	a	a	b	b	a	b	a	b	b	a	b	b	b	b	b	b	b	b	b	a	b	a	a	b	b	a	a	b	a	b	b	a	b	b	a	a	b	b	a	a
ABMR_02M22	a	b	b	b	b	a	b	b	a	b	b	b	b	a	a	a	a	b	a	a	a	b	b	a	b	b	b	a	a	b	a	a	a	a	b	b	a	a	a	b	b	a	b	b	b	b	a	a	b
ABMR_02N17	a	b	a	a	b	b	b	b	b	a	b	b	b	a	b	b	b	a	b	b	a	a	a	a	a	b	a	b	b	b	a	b	a	b	a	a	a	b	a	a	b	a	b	b	b	a	b	a	b
ABMR_02O21	b	b	b	b	a	b	a	a	b	b	b	a	a	b	b	a	a	b	a	b	b	b	a	b	b	a	a	a	a	a	b	a	a	a	a	a	a	b	a	a	b	a	b	a	a	a	b	a	a
CABMR_02P02	b	b	a	b	b	b	a	a	a	a	b	a	a	a	a	b	a	a	b	b	b	b	a	a	b	a	a	a	a	b	b	a	b	b	a	b	b	a	a	b	a	a	a	a	b	a	a	a	a
ABMR_02P03	a	b	a	b	b	a	b	b	a	a	a	a	b	a	a	a	b	b	a	a	b	b	a	b	a	b	a	b	a	a	a	a	a	b	b	a	a	b	b	b	b	a	a	a	b	b	b	b	b
ABMR_02P08	a	b	b	b	b	b	a	b	a	a	a	b	b	a	b	a	b	b	a	b	b	b	b	b	b	b	b	b	a	b	a	a	b	b	a	a	b	a	b	b	a	b	b	a	a	b	b	a	a
ABMR_02P16	b	b	b	a	a	b	b	a	b	a	a	b	b	b	a	b	b	a	b	a	a	b	b	a	a	b	b	a	b	a	b	b	b	a	b	a	a	a	b	a	a	b	a	b	b	a	a	a	b
ABMR_02P18	b	b	a	a	b	a	a	a	b	a	b	a	b	a	b	a	b	b	a	a	b	a	b	b	b	a	b	b	a	a	b	b	b	a	b	a	b	a	b	a	a	b	b	b	a	a	b	b	b
CABMR_03A14**	b	a	a	a	b	b	a	b	b	b	a	a	-	b	a	b	b	a	b	a	a	a	a	b	b	a	a	b	a	a	a	a	a	a	a	-	b	a	b	a	b	b	b	b	a	a	a	-	a
ABMR_03A22	a	a	a	b	b	a	a	b	a	b	a	a	a	a	a	a	a	b	a	b	b	b	b	b	a	a	b	b	a	a	b	a	a	b	a	a	b	a	b	b	b	b	b	a	a	a	a	b	b
CABMR_03B13	b	b	a	b	b	b	a	a	a	b	b	b	a	a	a	a	a	a	a	b	b	b	a	b	a	b	b	b	b	a	a	b	a	b	b	a	a	a	a	b	a	a	b	a	a	b	b	a	b
CABMR_03C01	a	b	b	b	b	a	b	b	a	a	b	b	b	b	a	a	a	a	a	a	a	b	a	b	a	b	a	a	b	a	b	a	a	b	b	a	b	b	b	b	b	a	b	a	b	b	b	a	b
CABMR_03C15	a	b	b	b	b	a	b	b	a	a	b	b	b	a	a	a	a	a	a	a	a	a	a	b	a	b	a	b	b	a	b	a	a	b	b	a	b	b	b	b	b	a	b	a	a	b	b	a	b
CABMR_03C23	a	b	a	a	a	b	a	b	b	a	b	b	a	b	b	a	b	b	b	a	b	a	b	a	b	b	b	a	b	b	b	b	a	a	b	a	-	b	a	b	a	a	a	a	-	b	a	b	b
CABMR_03E17	b	b	b	a	a	b	b	a	b	a	b	b	a	a	a	b	a	b	a	a	a	a	a	a	a	b	b	a	b	b	b	b	b	b	a	a	a	a	a	b	b	a	b	b	-	a	a	a	a
CABMR_03F07	b	b	a	a	a	a	a	a	b	a	b	b	a	a	b	b	a	b	a	a	b	a	a	b	a	b	b	b	a	b	b	b	a	a	b	a	a	a	b	a	b	b	b	a	b	b	-	a	a
ABMR_03G03	b	b	a	b	b	b	a	a	a	a	b	a	b	b	a	b	a	a	b	b	b	b	a	b	b	b	a	a	a	b	b	a	b	b	a	b	b	b	a	b	b	a	a	a	b	a	a	b	a
ABMR_03G17	a	a	a	b	a	b	a	a	a	a	a	b	b	a	a	a	a	a	a	b	a	b	b	b	a	b	b	b	b	a	b	b	b	b	b	b	a	a	b	a	b	a	a	a	b	a	b	a	b
ABMR_03G20	b	b	b	b	a	b	a	a	b	b	b	a	a	b	b	a	a	b	a	b	b	b	a	b	b	a	a	a	a	a	b	a	a	-	a	a	a	b	a	a	b	a	b	a	a	a	b	a	a
ABMR_03H02	b	b	a	a	b	a	a	a	b	a	b	a	b	a	b	a	b	b	a	a	b	b	b	b	b	a	b	b	a	a	b	b	b	b	b	a	b	a	b	a	a	b	b	b	a	a	a	b	b
CABMR_03H14	b	b	a	b	b	b	a	b	a	b	b	b	a	a	a	b	a	a	a	a	b	a	a	b	a	b	b	a	b	a	a	b	a	b	b	a	b	a	b	b	a	a	b	a	a	b	b	a	a
CABMR_03I08	b	b	a	a	b	b	b	a	b	b	a	b	a	b	a	b	a	b	b	a	a	b	a	b	a	a	a	a	b	b	a	a	a	b	a	b	b	b	a	b	b	a	b	a	a	a	b	b	a
CABMR_03I13	b	b	b	a	a	b	a	a	b	b	b	a	a	b	b	a	a	a	a	b	b	b	b	a	b	a	a	a	b	a	a	a	a	a	a	a	a	b	a	a	b	a	a	b	b	a	b	a	a
ABMR_03J10	b	a	a	a	b	b	a	a	a	b	b	a	b	a	b	b	b	a	a	b	b	b	b	a	b	a	b	b	a	a	a	b	b	b	a	b	b	a	b	b	a	a	a	b	b	b	a	b	b
CABMR_03J15	a	b	a	a	b	b	a	b	a	b	b	a	b	b	b	b	b	a	b	a	a	a	b	b	a	b	a	b	a	a	b	a	a	a	a	b	b	a	a	a	a	b	b	b	a	a	a	a	a
CABMR_03J20	b	b	b	b	a	b	a	a	b	b	b	a	a	b	b	a	a	a	a	b	b	b	a	b	b	a	a	a	b	a	a	a	a	a	a	a	a	b	a	a	b	a	a	b	b	a	b	a	a
ABMR_03K03	a	a	a	b	a	a	b	a	a	b	a	a	b	a	a	a	a	a	a	b	a	a	a	a	a	b	a	a	a	b	a	a	b	a	b	b	b	b	b	a	b	b	b	b	a	b	b	a	b
ABMR_03L07	a	b	a	b	a	a	b	a	a	a	b	a	b	b	b	b	b	b	a	b	b	b	b	a	b	a	a	b	a	a	b	b	a	b	a	b	b	b	a	b	b	a	b	b	a	a	b	b	b
ABMR_03L24	b	a	b	b	b	b	a	b	a	b	a	a	a	a	b	b	a	a	a	a	b	a	b	b	a	b	b	a	a	a	b	a	a	b	b	a	b	a	b	b	a	a	a	b	a	a	b	b	a
CABMR_03M18	b	a	a	a	a	a	a	b	a	b	b	a	b	a	a	a	a	b	b	b	a	b	b	a	a	b	a	a	a	b	b	b	b	-	a	b	b	a	a	a	b	b	a	a	b	a	a	b	b
ABMR_03N05	a	b	b	b	b	a	b	b	a	a	a	a	b	a	a	a	b	b	a	a	b	b	a	b	a	a	a	b	a	a	a	a	a	b	b	a	a	b	b	b	b	a	a	a	b	b	b	b	b
CABMR_03O06*	b	a	a	a	b	b	a	b	b	b	a	a	-	b	a	b	b	a	b	a	a	a	a	b	b	a	a	b	a	a	a	a	a	a	a	b	b	a	b	a	b	b	b	b	a	a	a	b	a
ABMR_03O07	a	a	a	b	a	b	b	a	b	b	b	b	a	b	b	a	a	a	a	b	a	b	b	b	a	b	b	b	a	a	b	b	b	b	b	b	a	a	b	a	b	b	a	a	a	a	a	b	a
ABMR_03O10	b	b	b	a	a	b	b	a	b	a	a	a	a	b	b	b	b	a	a	b	a	a	b	b	a	b	b	a	b	a	b	a	a	b	a	a	b	b	a	b	b	a	a	b	b	b	a	a	b
ABMR_03P05	b	b	a	a	b	b	b	a	b	b	a	b	a	b	a	b	a	b	b	a	a	b	a	b	a	a	a	a	b	b	a	a	a	b	a	b	b	b	a	b	b	a	b	a	a	a	b	b	a
CABMR_03P12	b	b	a	a	b	a	b	b	b	b	a	a	a	b	b	b	b	b	b	a	a	a	a	b	b	a	a	b	a	a	a	a	a	a	b	b	b	a	b	a	b	b	b	b	a	a	a	b	a
ABMR_03P16	b	b	a	b	b	b	a	a	a	a	b	a	a	a	a	b	a	a	b	b	b	b	a	a	b	a	a	a	a	b	b	a	b	b	a	b	b	a	a	b	a	a	a	a	a	a	a	a	a
ABMR_03P20	b	b	b	a	a	b	b	a	b	a	a	a	a	b	b	b	b	a	a	b	a	a	b	b	a	b	b	a	b	a	b	a	a	b	a	a	b	b	a	b	b	a	a	b	b	b	a	a	b
ABMR_03P21	a	b	b	b	b	a	a	b	a	a	a	b	b	b	a	a	a	a	b	a	a	b	a	b	a	b	b	a	a	a	b	a	b	b	b	a	b	b	b	b	b	a	b	a	b	b	b	a	b
ABMR_04B04	b	a	a	a	a	a	a	b	a	a	a	a	b	b	a	a	a	b	a	b	b	b	b	a	a	b	a	a	b	b	b	b	b	b	a	b	b	a	a	a	b	b	a	a	b	a	a	a	b
ABMR_04B09**	a	a	a	b	a	a	b	a	a	b	a	a	a	a	a	a	a	a	a	b	a	a	a	a	a	a	a	a	a	b	a	a	b	a	b	b	b	b	b	a	-	b	b	a	a	-	b	a	-
ABMR_04C16	b	b	b	a	a	b	b	b	b	b	a	b	a	b	b	a	a	b	b	a	a	a	a	a	a	b	a	b	a	b	b	b	a	b	a	b	b	b	b	b	b	a	b	b	a	a	b	b	b
CABMR_04D15	b	b	b	a	a	b	b	a	b	a	b	b	a	a	a	b	a	b	a	a	a	a	a	b	a	b	b	a	b	b	b	b	b	-	a	a	a	a	a	b	b	a	b	b	a	b	a	a	a
CABMR_04E23	b	a	a	a	b	b	a	b	b	b	a	a	b	b	a	b	a	a	b	a	a	a	b	b	a	a	a	b	a	b	a	a	a	a	a	b	b	a	b	a	b	b	b	b	a	a	b	b	a
ABMR_04F08	a	b	b	b	b	a	b	b	a	a	a	a	b	a	a	a	b	b	a	a	b	b	a	b	a	a	a	b	a	a	a	a	a	b	b	a	a	b	b	b	b	a	a	a	b	b	b	b	b
CABMR_04F22*	b	a	a	b	b	a	b	b	b	-	b	b	b	b	a	b	a	b	b	b	a	b	b	a	a	b	a	a	b	a	b	b	a	b	b	a	b	a	b	a	b	a	b	b	a	b	b	-	b
ABMR_04G07***	b	b	a	b	a	b	b	a	a	a	b	b	a	b	a	b	b	a	b	b	b	b	a	b	b	a	b	a	b	b	b	b	b	-	b	b	b	b	b	b	a	a	a	b	b	b	a	a	a
ABMR_04G08	a	b	a	a	b	b	b	b	b	a	b	b	b	a	b	b	b	a	b	b	a	a	a	a	a	b	a	b	b	b	a	b	a	b	a	a	a	b	a	a	b	a	b	b	b	a	b	a	b
ABMR_04G24	a	b	a	b	b	b	a	b	a	b	b	b	b	b	b	a	b	b	b	a	a	a	b	a	b	a	a	a	a	b	a	a	a	a	a	b	b	b	a	b	b	a	b	b	a	b	b	a	a
ABMR_04H01	b	b	a	a	b	b	b	a	b	b	a	b	a	b	b	b	a	b	b	a	a	b	a	b	a	a	a	b	b	b	b	a	a	-	a	b	b	b	a	b	b	a	b	a	a	a	b	b	b
ABMR_04H05	a	a	b	b	b	a	b	a	b	b	a	a	a	b	b	a	b	b	b	a	b	b	b	b	b	a	b	b	b	b	a	b	a	a	a	b	b	b	b	a	a	b	b	b	a	b	b	a	a
ABMR_04I08	a	a	a	b	a	b	a	b	b	b	b	a	a	a	b	a	b	b	a	a	b	a	b	b	a	a	b	b	a	a	b	b	a	a	b	b	a	a	b	a	b	b	a	b	b	b	b	b	b
ABMR_04I16	b	b	b	a	a	b	b	a	b	a	a	a	a	b	b	b	b	a	a	b	a	a	b	b	a	b	b	a	b	a	b	a	a	b	a	a	b	b	a	b	b	a	a	b	b	b	a	a	b
CABMR_04I19	a	b	a	a	a	b	a	b	b	a	b	b	a	b	b	a	b	b	b	a	b	a	b	a	b	b	b	a	b	b	b	b	a	a	b	a	b	b	a	b	a	a	a	a	b	b	a	b	b
ABMR_04J03	b	b	b	b	a	b	a	a	b	b	b	a	a	b	b	a	a	b	a	b	b	b	a	b	b	a	a	a	a	a	b	a	a	a	a	a	a	b	a	a	b	a	b	a	a	a	b	a	a
CABMR_04J06	b	a	a	a	a	a	a	b	a	b	b	a	b	a	a	a	a	b	b	b	a	b	b	a	a	b	a	a	a	b	b	b	b	b	a	b	b	a	a	a	b	b	a	a	b	a	a	b	b
ABMR_04K05	a	a	a	b	b	a	a	b	a	b	-	a	a	a	a	a	a	b	a	b	b	b	b	b	a	a	b	b	a	a	b	a	a	b	a	a	b	a	-	b	b	b	b	a	a	a	a	b	b
CABMR_04K10	a	a	a	b	a	b	a	a	a	a	a	b	b	a	a	a	a	a	a	b	a	b	b	b	a	b	b	b	b	a	b	b	b	b	b	b	a	a	b	a	b	a	a	a	b	a	b	a	b
CABMR_04K19***	b	b	a	b	a	b	b	a	a	a	b	b	a	b	a	b	a	a	b	b	b	b	a	b	b	a	b	a	b	b	b	b	b	b	b	b	b	b	b	b	b	a	a	b	b	b	a	a	a
ABMR_04L03	a	b	b	a	b	b	b	b	a	b	b	b	a	b	b	b	a	a	a	b	a	a	a	a	a	b	a	b	a	b	a	b	a	-	b	b	b	b	b	a	b	a	b	b	a	a	b	a	b
ABMR_04L05	a	a	b	b	a	b	a	b	b	a	b	a	a	b	a	a	a	b	a	b	b	b	a	a	b	a	b	a	b	a	b	b	a	b	b	a	a	a	a	b	b	a	a	b	b	a	a	b	a
ABMR_04L16	a	b	b	a	b	b	b	b	a	b	b	b	a	b	b	a	a	a	a	b	a	a	a	a	a	b	a	b	-	a	a	b	a	b	b	b	b	b	b	a	-	b	-	b	a	a	b	a	b
ABMR_04L19	b	b	b	a	a	b	b	a	b	a	a	a	a	b	b	b	b	a	a	b	a	a	b	b	a	b	b	a	a	a	b	b	a	b	a	a	b	b	a	b	b	a	a	b	b	b	a	a	b
CABMR_04N23	b	a	b	a	a	b	a	a	b	a	a	a	a	b	b	b	b	a	a	b	a	b	b	b	a	b	b	a	a	b	b	b	b	b	a	a	b	b	a	b	b	a	a	b	b	b	a	a	b
ABMR_04O09	a	b	a	b	a	b	a	a	a	b	b	a	b	b	b	b	b	b	a	b	b	b	a	b	b	a	a	a	a	a	b	b	b	b	b	b	b	b	a	a	a	b	a	b	b	a	b	b	b
CABMR_04O10	b	a	b	a	b	b	b	b	a	b	a	b	b	a	b	b	b	a	a	a	a	a	a	a	a	b	a	b	b	b	b	b	b	b	b	b	a	b	a	a	b	a	b	b	a	a	b	a	a
CABMR_04O18	a	b	a	b	b	a	b	b	a	b	a	a	a	a	a	a	a	b	b	b	b	b	a	b	a	b	b	b	b	a	b	a	a	b	a	a	a	a	a	a	b	b	a	a	b	a	a	b	b
CABMR_04O23	a	a	a	a	b	b	a	b	a	b	a	a	b	b	a	b	b	a	b	a	a	a	b	b	a	a	a	-	a	b	b	a	a	a	a	b	b	b	a	a	b	b	b	b	a	a	a	b	a
CABMR_04P01	b	a	a	a	a	a	b	b	b	b	b	a	a	b	b	a	b	a	a	b	a	b	b	b	b	b	a	b	b	b	b	b	a	b	a	a	b	a	b	b	a	b	b	b	b	b	a	a	a
ABMR_04P14	-	b	b	b	a	a	b	b	a	b	b	a	a	a	b	-	b	b	a	b	b	a	a	b	a	a	a	b	a	a	a	a	a	a	b	a	a	a	b	b	a	b	a	a	a	a	b	b	b
CABMR_04P19	a	a	b	b	b	a	b	a	b	b	a	a	a	b	b	a	b	b	b	a	b	b	b	b	b	a	b	b	b	b	a	b	a	a	a	b	b	b	b	a	a	b	b	b	a	b	b	a	a
CABMR_04P23	b	b	a	a	b	b	b	b	b	b	a	a	a	b	b	b	b	b	b	a	a	a	a	b	b	a	a	b	a	a	a	a	a	a	a	b	b	a	b	a	b	b	b	b	a	a	a	b	a
ABMR_05A04	a	b	a	b	b	a	b	b	a	a	a	a	b	a	a	a	b	b	a	a	b	b	a	b	a	b	a	b	a	a	a	a	a	b	b	a	a	b	b	b	b	a	a	a	b	b	b	b	b
ABMR_05A09**	b	a	a	a	a	a	b	a	b	b	b	a	b	b	b	b	b	b	a	b	a	b	a	b	b	b	a	a	b	b	b	b	a	b	b	a	b	a	b	a	a	b	a	b	b	b	b	b	a
ABMR_05B15	a	b	b	b	b	a	a	b	a	a	b	a	b	b	b	a	a	a	b	b	a	b	a	b	b	b	b	b	a	b	a	a	b	b	a	b	b	a	a	b	a	b	b	b	a	a	b	b	a
CABMR_05B21	a	b	a	a	b	b	a	b	b	a	a	b	a	a	a	b	a	b	a	a	b	a	b	a	b	a	b	b	b	a	a	b	a	a	a	a	b	a	b	b	a	a	b	a	a	b	b	a	a
ABMR_05D21	a	a	a	a	a	b	a	b	a	a	b	a	a	a	a	b	a	b	a	b	a	b	a	b	a	a	a	a	b	b	a	b	a	a	b	a	b	b	b	a	a	b	b	b	a	a	b	b	b
ABMR_05D23	b	b	b	a	a	b	b	a	b	a	b	b	b	b	a	b	b	a	b	a	a	b	b	a	a	b	-	a	b	a	b	b	b	a	b	a	a	a	b	a	a	b	a	b	b	a	a	a	b
ABMR_05F11	a	b	a	b	a	b	a	a	a	b	b	a	b	b	b	b	b	b	a	b	b	b	a	b	b	a	a	a	a	a	b	b	b	b	b	b	b	b	a	a	a	b	a	b	b	a	b	b	b
CABMR_05H23	a	b	b	b	b	a	b	-	a	a	a	a	b	a	a	a	b	-	a	a	b	b	a	b	a	a	a	b	a	a	a	a	a	b	b	a	a	b	b	b	b	a	a	a	b	b	b	b	b
ABMR_05J12	a	b	b	b	a	a	a	b	b	b	a	a	a	b	a	a	a	a	a	b	a	a	a	a	b	a	-	b	b	a	a	a	b	a	b	a	a	b	b	a	b	b	a	b	b	b	a	b	a
ABMR_05K01	a	b	a	b	a	b	a	a	a	b	b	a	b	b	b	b	b	b	a	b	b	b	a	b	b	a	a	a	a	a	b	b	b	b	b	b	b	b	a	a	a	b	a	b	b	a	b	b	b
CABMR_05L23	b	a	b	b	b	b	b	b	a	b	a	a	a	a	b	b	a	a	a	a	b	a	b	b	a	b	b	a	a	a	b	a	a	b	b	a	b	a	b	b	a	a	a	b	a	a	b	b	a
ABMR_05N11	a	b	b	b	a	a	a	b	b	b	a	a	a	b	a	a	a	a	a	b	a	a	a	a	b	a	b	b	b	a	a	a	b	a	b	a	a	b	b	a	b	b	a	b	b	b	a	b	a
ABMR_05N20	b	b	a	b	b	a	a	a	b	a	b	a	b	a	b	a	b	b	b	a	b	a	b	b	b	a	b	b	a	a	b	b	b	a	b	a	b	a	b	a	a	b	b	a	a	a	b	b	b
CABMR_05O14	a	a	b	b	a	b	a	b	b	a	b	b	a	b	a	a	b	b	a	a	b	b	a	a	b	a	b	a	b	a	b	b	a	b	b	a	a	a	a	b	-	a	a	a	-	b	a	b	a
CABMR_06A13	b	b	a	b	b	a	a	a	b	a	b	a	b	a	b	a	b	b	b	a	b	a	b	b	b	a	b	-	a	a	b	b	b	a	-	a	b	a	b	a	a	b	b	a	a	a	-	-	b
ABMR_06B05	b	a	b	b	b	b	a	b	a	b	a	a	a	a	b	b	a	a	a	a	b	a	b	b	a	b	b	a	a	a	b	a	a	b	b	a	b	a	b	b	a	a	a	b	a	a	b	b	a
CABMR_06B15	a	a	b	b	b	a	b	a	b	b	a	a	a	b	b	a	b	b	b	a	b	b	b	b	b	a	b	b	b	b	a	b	a	a	a	b	b	b	b	a	a	b	b	b	a	b	b	a	a
ABMR_06C15	b	b	a	a	b	b	a	a	a	b	b	a	b	a	b	a	b	a	a	b	b	b	b	b	b	a	b	b	a	a	a	b	b	b	b	a	b	a	b	b	a	a	a	b	b	a	a	b	b
ABMR_06D16	a	b	b	b	b	b	a	b	a	a	a	b	b	a	b	a	b	b	a	b	b	b	b	b	b	b	b	b	a	b	a	a	b	b	a	a	b	a	b	b	a	b	b	a	a	b	b	a	a
CABMR_06D24*	b	a	a	a	b	b	a	b	b	b	a	a	b	b	a	b	a	a	b	a	a	a	b	b	a	a	a	b	a	b	b	a	a	a	a	b	b	b	a	a	b	b	b	b	a	a	a	b	a
ABMR_06E03	a	b	b	a	b	a	b	a	b	b	b	b	b	b	b	b	a	a	a	b	a	b	b	b	a	a	b	a	a	b	b	b	b	a	a	a	a	a	b	a	a	b	a	b	b	a	a	b	a
ABMR_06E16	b	b	b	a	a	b	b	a	b	a	a	a	a	b	b	b	b	a	a	b	a	a	b	b	a	b	b	a	b	a	b	a	a	b	a	a	b	b	a	b	b	a	a	b	b	b	a	a	b
ABMR_06E19	a	b	b	b	a	a	a	b	b	b	a	a	a	b	b	a	a	a	a	b	a	a	a	a	b	a	b	b	a	a	a	a	b	a	b	a	a	b	b	a	b	-	a	b	b	b	a	b	a
CABMR_06F19	b	b	b	a	a	b	b	a	b	a	b	b	b	b	a	b	a	a	b	a	a	b	b	a	a	b	b	a	b	a	b	b	b	a	b	a	a	a	b	b	a	a	a	b	b	a	a	a	b
ABMR_06G17	a	b	a	b	b	a	b	b	a	b	a	a	b	a	a	a	a	b	b	b	b	b	b	b	a	b	b	b	b	a	b	a	a	b	a	a	a	a	a	a	b	b	b	a	a	a	a	b	b
ABMR_06H10	b	b	b	a	a	b	b	a	b	a	a	b	b	b	a	b	b	a	b	a	a	b	b	a	a	b	b	a	b	a	b	b	b	a	b	a	a	a	b	a	a	b	a	b	b	a	a	a	b
ABMR_06I16**	a	b	b	b	b	a	a	b	a	a	b	a	b	b	b	a	a	a	b	b	a	b	a	b	b	a	b	b	a	a	b	a	a	b	a	b	a	b	b	b	b	a	a	b	b	a	a	b	a
CABMR_06I18*	a	b	a	a	a	a	a	b	b	a	b	a	b	a	a	a	a	b	a	b	a	b	b	a	b	b	b	b	b	a	b	a	a	b	a	a	b	a	b	b	a	b	a	a	b	b	a	b	a
CABMR_06I23	a	b	a	a	b	b	b	b	a	a	b	b	a	b	a	b	a	a	b	b	a	a	a	a	a	b	a	b	a	b	a	b	a	-	b	a	b	b	b	a	b	a	b	b	a	a	b	a	b
CABMR_06J10	b	a	a	a	b	b	a	b	a	b	a	a	b	b	a	b	a	a	b	a	a	a	b	b	a	a	a	b	a	b	b	a	a	a	a	b	b	b	a	a	b	b	b	b	a	a	a	b	a
CABMR_06K02	a	a	a	b	a	a	b	a	a	b	a	a	b	a	a	a	a	a	a	b	a	a	a	a	a	b	a	a	a	b	a	a	b	a	b	b	b	b	b	a	b	b	b	b	a	b	b	a	b
ABMR_06K19	b	b	b	a	a	b	b	a	b	a	a	b	b	b	b	-	b	a	b	b	a	b	b	b	a	b	a	a	b	a	b	b	b	-	b	a	a	a	b	a	a	b	a	b	b	a	a	a	a
ABMR_06L03	a	a	a	b	a	b	a	a	a	a	a	b	b	a	a	a	a	a	a	b	a	b	b	b	a	b	b	b	b	a	b	b	b	b	b	b	a	a	b	a	b	a	a	a	b	a	b	a	b
CABMR_06L08	a	a	a	b	b	a	a	b	a	b	a	a	a	a	a	a	a	b	a	b	b	b	b	b	a	a	b	b	a	a	b	a	a	b	a	a	b	a	b	b	b	b	b	a	a	a	a	b	b
CABMR_06L09	a	b	a	b	b	a	b	b	a	b	a	a	a	a	a	a	a	b	b	b	b	b	a	b	a	b	b	b	b	a	b	a	a	b	a	a	a	a	a	a	b	b	a	a	b	a	b	b	b
CABMR_06L14	a	b	b	a	a	b	a	b	b	a	b	b	b	b	b	a	b	b	b	a	b	a	a	a	b	a	b	a	b	a	b	b	b	a	b	a	b	b	a	b	a	a	a	a	b	b	a	b	b
ABMR_06L18	a	b	a	b	b	a	b	b	a	b	a	a	a	a	a	a	a	b	b	b	b	b	a	b	a	b	b	b	b	a	b	a	a	b	a	a	a	a	a	a	b	b	a	a	b	a	b	b	b
CABMR_06M10	b	b	b	b	b	a	a	b	b	b	a	b	-	b	b	a	b	a	b	b	a	a	b	a	a	b	b	b	b	b	b	a	a	b	b	a	a	b	b	a	a	b	b	b	a	b	b	a	b
ABMR_06M18	a	b	b	a	a	b	b	b	b	b	b	b	a	b	b	a	a	b	a	b	a	a	a	a	a	b	a	b	a	b	a	b	a	b	a	b	b	a	b	a	b	a	b	b	a	a	b	b	b
ABMR_06N06	a	a	a	b	a	b	b	a	b	b	b	b	a	b	b	a	a	a	a	b	a	b	b	b	a	b	b	b	a	a	b	b	b	b	b	b	a	a	b	a	b	b	a	a	a	a	a	b	a
ABMR_06N08	b	a	a	a	b	b	a	b	b	b	a	a	b	b	a	b	a	a	b	a	a	a	b	b	a	a	a	b	a	b	b	a	a	a	a	b	b	b	a	a	b	b	b	b	a	a	a	b	a
CABMR_06N13	a	b	a	b	b	a	b	b	a	b	a	a	a	a	a	a	a	b	b	b	b	b	a	b	a	b	b	b	b	a	b	a	a	b	a	a	a	a	a	a	b	b	a	a	b	a	a	b	b
ABMR_06N16	b	b	b	a	a	b	b	a	b	a	a	b	b	b	a	b	b	a	b	a	a	b	b	a	a	b	b	a	b	a	b	b	b	a	b	a	a	a	b	a	a	b	a	b	b	a	a	a	b
ABMR_06N18	a	b	b	b	b	a	b	b	a	a	a	a	b	a	a	a	b	b	a	a	b	b	a	b	a	a	a	b	a	a	a	a	a	b	b	a	a	b	b	b	b	a	a	a	b	b	b	b	b
ABMR_06N24	a	b	a	b	b	a	b	a	b	b	b	b	a	a	b	b	a	a	b	b	a	b	a	b	a	a	b	a	a	b	b	b	b	a	a	a	a	a	b	a	a	b	a	b	b	a	a	b	a
ABMR_06O04	a	a	a	b	a	b	a	a	a	a	a	b	b	a	a	a	a	a	a	b	a	b	b	b	a	b	b	b	b	a	b	b	b	b	b	b	a	a	b	a	b	a	a	a	b	a	b	a	b
ABMR_06O19	b	b	b	a	b	a	a	a	b	a	b	a	b	a	b	a	b	b	b	a	b	a	b	b	b	a	b	b	a	a	b	b	b	a	b	a	b	a	b	a	a	b	b	a	a	b	b	b	a
ABMR_06P06*	a	b	b	b	b	a	a	b	b	a	b	a	a	b	b	a	a	a	b	b	a	b	a	a	b	a	b	b	a	a	b	a	a	b	a	b	a	b	b	b	b	a	a	b	b	a	a	b	a
CABMR_06P08	b	b	b	a	a	b	a	a	b	b	b	a	a	b	b	a	a	a	a	b	b	b	a	a	b	a	a	a	b	a	a	a	a	a	a	a	a	b	a	a	b	a	a	b	b	a	b	a	a
CABMR_06P15**	a	b	b	b	b	a	a	b	a	a	b	a	b	b	b	a	b	a	b	b	b	b	a	b	b	b	b	b	a	b	a	a	b	b	a	b	b	a	a	b	a	b	b	b	a	a	b	b	a
ABMR_07A02**	b	b	a	a	a	a	b	a	b	b	b	a	b	b	b	b	b	b	a	b	b	b	a	-	b	b	a	a	b	b	b	b	b	b	b	a	b	a	b	a	a	b	a	b	b	b	b	b	a
ABMR_07A04	b	a	a	a	a	a	a	b	a	b	b	a	b	a	a	a	a	b	b	b	a	b	b	a	a	b	a	a	a	b	b	b	b	b	a	b	b	a	a	a	b	b	a	a	b	a	a	b	b
CABMR_07A05	a	a	b	b	a	b	a	b	b	a	b	b	a	b	a	a	b	b	a	a	b	b	a	a	b	a	b	a	-	a	b	b	a	b	b	a	a	a	a	-	b	a	a	a	b	b	a	b	a
ABMR_07B12	b	b	b	a	b	a	a	a	b	a	b	a	b	a	b	a	b	b	b	a	b	a	b	b	b	a	b	b	a	a	b	b	b	a	b	a	b	a	b	a	a	b	b	a	a	b	b	b	a
ABMR_07C04	b	a	b	a	a	a	a	b	a	a	b	a	a	b	a	a	a	b	b	b	a	b	b	a	a	b	a	a	a	b	b	b	b	b	b	b	b	a	a	b	b	a	a	a	a	a	b	b	b
ABMR_07C11	a	b	a	a	b	b	a	b	a	b	b	a	b	b	b	-	b	a	b	a	a	a	b	b	a	b	a	b	a	a	b	a	a	a	a	b	b	a	a	a	a	b	b	b	a	a	a	a	a
ABMR_07C16	a	b	b	a	b	a	a	a	b	a	b	b	a	a	a	a	b	b	a	a	b	a	b	b	b	a	b	b	a	a	b	a	b	a	b	a	b	a	b	a	a	a	a	a	a	b	b	b	a
ABMR_07C17	b	b	b	a	a	b	b	a	b	a	a	b	b	b	b	b	b	a	b	b	a	b	b	b	a	b	a	a	b	a	b	b	b	a	b	a	a	a	b	a	a	b	a	b	b	a	a	a	a
CABMR_07D02	b	b	a	b	b	b	a	a	a	a	b	a	a	a	a	b	a	a	b	b	b	b	a	a	b	a	a	a	a	b	b	a	b	b	a	b	b	a	a	b	a	a	a	a	a	a	a	a	a
CABMR_07D04	a	a	a	a	b	b	b	a	b	b	a	b	a	a	a	b	b	b	a	b	b	a	b	b	a	a	a	a	b	a	a	a	a	a	a	a	a	b	b	a	a	a	a	a	a	b	b	b	a
CABMR_07D07	a	b	b	a	a	a	b	b	a	b	a	b	a	b	b	a	b	b	b	a	b	a	a	b	b	a	a	b	b	a	a	b	b	b	b	a	b	a	b	b	b	a	a	a	b	a	b	b	a
ABMR_07D12	b	b	a	a	b	a	a	a	b	a	b	a	b	a	b	a	b	b	a	a	b	b	b	b	b	a	b	b	a	a	b	b	b	b	b	a	b	a	b	a	a	b	b	b	a	a	a	b	b
ABMR_07E02	b	b	a	a	a	b	a	b	b	a	b	b	a	b	b	a	b	b	b	a	b	a	b	a	b	b	b	a	b	b	b	b	a	a	b	a	b	b	a	b	a	a	a	a	b	b	a	b	b
ABMR_07E04	b	b	b	a	a	b	b	a	b	a	b	b	a	a	a	b	a	b	a	a	a	a	a	b	a	b	b	a	b	b	b	b	b	b	a	a	a	a	a	b	b	a	b	b	a	b	a	a	a
ABMR_07E05	a	b	b	b	b	a	b	b	a	a	a	a	b	a	a	a	b	b	a	a	b	b	a	b	a	a	a	b	a	a	a	a	a	b	b	a	a	b	b	b	b	a	a	a	b	b	b	b	b
ABMR_07E12	b	b	b	b	b	a	b	a	b	b	a	a	a	b	a	b	b	a	a	a	a	a	b	b	a	b	a	b	b	a	b	b	a	-	b	a	a	b	b	b	b	a	a	a	b	a	b	b	a
CABMR_07E18	b	a	b	b	b	b	b	a	a	a	b	a	a	b	a	b	a	a	a	a	a	a	a	a	a	a	b	a	a	a	b	a	a	a	a	b	b	b	b	a	b	b	a	a	a	b	a	b	a
CABMR_07E19*	a	b	b	b	b	a	a	b	a	a	b	a	b	b	b	a	b	a	b	b	b	b	a	b	b	b	-	b	a	b	a	a	b	-	a	b	b	a	a	b	a	b	b	b	a	a	b	b	a
ABMR_07E24	b	b	a	a	b	a	a	a	b	a	b	a	b	a	b	a	b	b	a	a	b	a	b	b	b	a	-	b	a	a	b	b	b	a	b	a	b	a	b	a	a	b	b	b	a	a	b	b	b
ABMR_07F18	a	a	a	b	a	b	a	a	a	a	a	b	b	a	a	a	a	a	a	b	a	b	b	b	a	b	b	b	b	a	b	b	b	b	b	b	a	a	b	a	b	a	a	a	b	a	b	a	b
ABMR_07G01	a	b	a	b	b	a	b	a	b	b	b	b	a	a	b	b	a	a	b	b	a	b	a	b	a	a	b	a	a	b	b	b	b	a	a	a	a	a	b	a	a	b	a	b	b	a	a	b	a
ABMR_07G03	a	b	b	b	b	a	b	b	a	a	a	a	b	a	a	a	b	b	a	a	b	b	a	b	a	a	a	b	a	a	a	a	a	b	b	a	a	b	b	b	b	a	a	a	b	b	b	b	b
ABMR_07G04	a	a	a	b	a	b	a	a	a	a	a	b	b	a	a	a	a	a	a	b	a	b	b	b	a	b	b	b	b	a	b	b	b	b	b	b	a	a	b	a	b	a	a	a	b	a	b	a	b
ABMR_07G15	a	b	a	b	b	b	a	b	a	b	b	b	b	b	b	a	b	b	b	a	a	a	b	a	b	a	a	a	a	b	a	a	a	a	a	b	b	a	a	b	b	a	b	b	a	b	b	a	a
CABMR_07H02	b	b	b	a	a	b	b	a	b	a	b	b	b	b	a	b	b	a	b	a	a	b	b	a	a	b	b	-	-	a	b	b	b	a	b	a	a	a	b	a	a	b	a	b	b	a	a	a	b
CABMR_07H13	b	b	a	a	b	b	b	b	b	b	a	a	a	b	b	b	b	b	b	a	a	a	a	b	b	a	a	b	a	a	a	a	a	a	a	b	b	a	b	a	b	b	b	b	a	a	a	b	a
ABMR_07I11	b	b	b	a	a	b	b	a	b	a	a	a	a	b	b	b	b	a	a	b	a	a	b	b	a	b	b	a	b	a	b	a	a	b	a	a	b	b	a	b	b	a	a	b	b	b	a	a	b
ABMR_07I20	b	a	a	a	a	a	b	b	b	b	b	a	a	b	b	a	b	a	a	b	a	b	b	b	b	b	a	b	b	b	b	b	a	b	a	a	b	a	b	b	a	-	b	b	b	b	a	a	a
CABMR_07I21	a	b	b	a	b	b	b	b	a	b	b	b	a	b	b	b	a	a	a	b	a	a	a	a	a	b	a	b	a	a	a	b	a	b	b	b	b	b	b	a	b	b	b	b	a	a	b	a	b
CABMR_07I24	a	b	b	a	a	b	a	b	b	a	b	b	b	b	b	a	b	b	b	a	b	a	a	a	b	a	b	a	b	a	b	b	b	a	b	a	b	b	a	b	a	a	a	a	b	b	a	b	b
ABMR_07J06	a	a	a	b	a	b	a	b	b	b	b	a	a	a	b	a	b	b	a	a	b	a	b	b	a	a	b	b	a	a	b	b	a	a	b	b	a	a	b	a	b	b	a	b	b	b	b	b	b
ABMR_07J21	a	b	b	b	b	a	a	b	a	a	a	b	b	b	a	a	a	a	b	a	a	b	a	b	a	b	b	a	a	a	b	a	b	b	b	a	b	b	b	b	b	a	b	a	b	b	b	a	b
CABMR_07K05	b	b	a	b	b	a	a	a	b	a	b	a	b	a	b	a	b	b	b	a	b	a	b	b	b	a	b	b	a	a	b	b	b	a	b	a	b	a	b	a	a	b	b	a	a	a	b	b	b
ABMR_07K19**	b	b	a	a	b	b	a	b	b	a	b	b	a	a	b	b	b	b	a	a	b	a	b	a	b	b	b	a	b	b	b	b	a	a	b	a	b	b	a	b	a	a	a	a	b	b	a	b	b
ABMR_07K21	a	b	a	a	b	b	b	b	b	a	b	b	b	a	b	b	b	a	b	b	a	a	a	a	a	b	a	b	b	b	a	b	a	b	a	a	a	b	a	a	b	a	b	b	b	a	b	a	b
CABMR_07K23	b	a	a	a	b	b	a	b	a	b	a	a	b	b	a	b	a	a	b	a	a	a	b	b	a	a	a	b	a	b	b	a	a	a	a	b	b	b	a	a	b	b	b	b	a	a	a	b	a
CABMR_07L05	b	a	a	b	a	b	b	b	b	a	a	b	b	a	a	a	a	a	a	b	a	a	b	b	a	b	b	b	b	a	b	b	b	b	b	b	a	a	b	a	b	a	a	a	b	a	b	a	b
ABMR_07L15	a	b	a	a	b	b	b	b	b	a	a	b	b	a	b	b	b	a	a	b	a	a	a	a	a	b	a	b	b	b	a	b	a	-	a	a	a	b	a	a	b	a	b	b	b	a	b	a	b
CABMR_07L22	a	a	a	a	a	b	a	b	a	a	b	a	a	a	b	b	a	a	a	b	a	b	a	b	a	a	a	a	b	b	a	b	a	a	b	b	b	b	b	a	a	b	b	b	a	a	b	a	b
CABMR_07M04	b	b	a	b	b	b	a	a	a	b	b	b	a	a	a	a	a	a	a	b	b	b	a	b	a	b	b	b	b	a	a	b	a	b	b	a	a	a	a	b	a	a	b	a	a	b	b	a	b
ABMR_07M08	b	b	b	a	a	b	b	a	b	a	a	a	a	b	b	b	b	a	a	b	a	a	b	b	a	b	b	a	b	a	b	a	a	b	a	a	b	b	a	b	b	a	a	b	b	b	a	a	b
CABMR_07M19	a	b	a	b	b	a	b	b	a	b	a	a	a	a	a	a	a	b	b	b	b	b	a	b	a	b	b	b	b	a	b	a	a	b	a	a	a	a	a	a	b	b	a	a	b	a	b	b	b
ABMR_07M20	a	a	b	b	b	a	a	a	b	b	a	a	a	b	b	b	b	b	b	a	b	b	b	b	b	a	b	b	b	b	a	b	a	a	a	b	a	b	b	a	a	b	b	b	a	b	b	a	a
ABMR_07M22	b	a	a	a	b	b	a	b	b	b	a	a	b	b	a	b	a	a	b	a	a	a	b	b	a	a	a	b	a	b	b	a	a	a	a	b	b	b	a	a	b	b	b	b	a	a	a	b	a
CABMR_07M23*	b	b	a	a	b	a	a	b	b	a	b	b	a	a	b	b	a	b	a	a	b	a	a	a	b	b	b	b	b	b	b	b	a	a	b	a	a	b	a	b	b	a	a	a	b	b	b	b	a
CABMR_07N05***	b	b	a	b	a	b	b	a	a	a	b	b	a	b	a	b	a	a	b	b	b	b	a	b	b	a	b	a	b	b	b	b	b	b	b	b	b	b	b	b	b	a	a	b	b	b	a	a	a
CABMR_07N16	a	a	a	a	a	b	a	b	b	a	b	a	a	a	b	a	a	a	b	b	a	b	a	b	b	a	a	b	b	b	a	b	a	a	b	b	b	a	b	a	a	b	b	b	a	a	b	a	a
ABMR_07N22	a	b	b	b	b	a	b	b	a	a	a	a	b	a	a	a	b	b	a	a	b	b	a	b	a	a	a	b	a	a	a	a	a	b	b	a	a	b	b	b	b	a	a	a	b	b	b	b	b
ABMR_07O07	a	b	a	b	b	a	b	b	a	a	a	a	b	a	a	a	b	b	a	a	b	b	a	b	a	b	a	b	a	a	a	a	a	-	b	a	a	b	b	b	b	a	a	a	-	b	b	b	b
ABMR_07O16	b	b	a	b	b	b	a	a	a	a	b	a	a	a	a	b	a	a	b	b	b	b	a	a	b	a	a	a	a	b	b	a	b	b	a	b	b	a	a	b	a	a	a	a	a	a	a	a	a
CABMR_07O23**	b	a	b	a	a	a	a	b	a	a	b	a	a	a	a	a	a	b	b	b	a	b	b	a	a	b	a	a	a	b	b	b	b	b	a	b	b	a	a	a	b	b	a	a	b	a	a	b	b
CABMR_07P03**	b	b	a	b	a	b	b	a	a	a	b	b	a	b	a	b	b	a	b	b	b	b	a	b	b	a	b	a	b	b	b	b	b	-	b	b	b	b	b	b	a	a	a	b	b	b	a	a	a
CABMR_07P09	a	a	b	b	b	a	a	a	b	b	a	a	a	b	b	b	b	b	b	a	b	b	b	b	b	a	b	b	b	b	a	b	a	a	a	b	a	b	b	a	a	b	b	b	a	b	b	a	a
CABMR_07P10	a	b	b	a	a	b	b	b	b	b	a	b	a	b	b	a	a	b	a	a	a	a	a	a	a	b	a	b	a	b	b	b	a	b	a	b	b	b	b	b	b	a	b	b	a	a	b	b	b
CABMR_07P12	b	a	a	a	b	b	a	b	b	b	a	a	b	b	a	b	a	a	b	a	a	a	b	b	a	a	a	b	a	b	b	a	a	a	a	b	b	b	a	a	b	b	b	b	a	a	a	b	a
CABMR_07P14	b	b	a	a	b	b	b	a	b	b	a	b	a	b	a	b	a	b	b	a	a	b	a	b	a	a	a	a	b	b	a	a	a	b	a	b	b	b	a	b	b	a	b	a	a	a	b	b	b
ABMR_07P16*	b	a	b	a	a	a	a	b	a	a	b	a	a	a	a	a	a	b	b	b	a	a	a	a	a	b	a	a	a	b	b	b	b	b	b	b	b	a	a	b	b	a	a	a	a	a	b	b	b
CABMR_08A19	a	b	a	a	b	b	b	b	a	a	b	b	a	b	a	b	a	a	b	b	a	a	a	a	a	b	a	b	a	b	a	b	a	b	b	a	b	b	b	a	b	a	b	b	a	a	b	a	b
CABMR_08B03	a	a	a	a	a	b	a	b	a	a	b	a	a	a	b	a	a	a	a	b	a	b	a	b	a	b	a	a	b	b	a	b	a	a	b	b	b	b	b	a	a	b	b	b	a	a	b	a	a
ABMR_08B17	b	b	a	b	b	a	a	a	b	a	b	a	b	a	b	a	b	b	b	a	b	a	b	b	b	a	b	b	a	a	b	b	b	a	b	a	b	a	b	a	a	b	b	a	a	a	b	b	b
CABMR_08B19	b	a	a	a	b	b	a	b	b	b	a	a	b	b	a	b	a	a	b	a	a	a	b	b	a	a	a	b	a	b	a	a	a	a	a	b	b	a	b	a	b	b	b	b	a	a	a	b	a
ABMR_08B24	b	a	b	a	a	a	a	b	a	a	b	a	a	b	a	a	a	b	b	b	a	b	b	a	a	b	a	a	-	b	b	b	b	b	a	b	b	a	a	b	b	a	a	a	b	a	a	b	b
ABMR_08D07	a	b	a	b	a	b	a	a	a	b	b	a	b	b	b	-	b	b	a	b	b	b	a	b	b	a	a	a	a	a	b	b	b	b	b	b	b	b	a	a	a	b	a	b	b	a	b	b	b
ABMR_08D20	a	b	a	b	b	a	b	a	b	b	b	b	b	b	b	b	a	a	b	b	a	b	b	b	a	a	b	a	a	b	b	b	b	a	a	a	a	a	b	a	a	b	a	b	b	a	a	b	a
CABMR_08E02*	b	a	a	a	b	b	a	b	b	b	a	a	b	b	a	b	b	a	b	a	a	a	a	b	b	a	a	b	a	a	a	a	a	a	a	b	b	a	b	a	b	b	b	b	a	a	a	b	a
CABMR_08E04	a	b	a	b	b	b	a	b	a	b	b	b	b	b	b	a	b	b	b	a	a	a	b	a	b	a	a	a	a	b	a	a	a	a	a	b	b	a	a	b	b	a	b	b	a	b	b	a	a
ABMR_08E05	b	b	b	a	a	b	b	a	b	a	a	a	a	b	b	b	b	a	a	b	a	a	b	b	a	b	-	a	b	a	b	a	a	b	a	a	b	b	a	b	b	a	a	b	b	b	a	a	b
ABMR_08E07	b	b	b	b	b	a	b	b	a	b	b	a	b	a	a	a	a	b	a	a	a	b	b	b	b	b	-	a	a	b	b	a	a	a	b	b	a	a	a	b	b	a	b	b	b	b	a	a	b
ABMR_08E12**	b	b	a	a	b	b	a	b	b	a	b	b	a	a	b	b	b	b	a	a	b	a	b	a	b	b	b	a	b	b	b	b	a	a	b	a	b	b	a	b	a	a	a	a	b	b	a	b	b
ABMR_08E14**	b	b	a	a	b	b	a	b	b	a	b	b	a	a	b	b	b	b	a	a	b	a	b	a	b	b	b	a	b	b	b	b	a	a	b	a	b	b	a	b	a	a	a	a	b	b	a	b	b
ABMR_08E22	b	b	a	b	b	b	a	a	a	a	b	a	b	b	a	b	a	a	b	b	b	b	a	b	b	b	a	a	a	b	b	a	b	b	a	b	b	b	a	b	b	a	a	a	b	a	a	b	a
ABMR_08F19	b	b	a	b	b	b	a	b	a	b	b	b	a	a	a	b	a	a	a	a	b	a	a	b	a	b	b	a	b	a	a	b	a	b	b	a	b	a	b	b	a	a	b	a	a	a	b	a	a
CABMR_08G14	b	a	a	b	a	b	a	a	a	a	a	b	b	a	a	a	a	a	a	b	a	b	b	b	a	b	b	b	b	a	b	b	b	b	b	b	a	a	b	a	b	a	a	a	b	a	b	a	b
ABMR_08H07	a	a	a	b	b	a	a	b	a	b	a	a	a	a	a	a	a	b	a	b	b	b	b	b	a	a	b	b	a	a	b	b	a	b	a	a	b	a	b	b	b	b	b	a	a	b	a	a	b
ABMR_08H21	a	a	a	b	b	a	a	b	a	b	a	a	a	a	a	a	a	b	a	b	b	b	b	b	a	a	b	b	a	a	b	a	a	b	a	a	b	a	b	b	b	b	b	a	a	a	a	b	b
CABMR_08I02	a	b	b	b	b	a	a	b	a	a	a	b	b	b	a	a	a	a	b	a	a	b	a	b	a	b	b	a	a	a	b	a	b	b	b	a	b	b	b	b	b	a	b	a	b	b	b	a	b
CABMR_08J01	b	b	b	a	a	b	b	a	b	a	b	b	b	b	a	b	b	a	b	a	a	b	b	a	a	b	b	a	b	a	b	b	b	a	b	a	a	a	b	a	a	b	-	b	b	a	a	a	b
CABMR_08J15	b	b	b	a	a	b	b	b	b	b	a	b	a	b	b	a	a	b	b	a	a	a	a	a	a	b	a	b	a	b	b	b	a	-	a	b	b	b	b	b	b	a	b	b	-	a	b	b	b
ABMR_08J16	b	b	a	b	b	b	a	a	a	a	b	a	a	a	a	-	a	a	b	b	b	b	a	a	b	a	a	a	a	b	b	a	b	-	a	b	b	a	a	b	a	a	a	a	a	a	a	a	a
CABMR_08K24	b	b	b	b	b	b	a	a	a	a	b	b	a	a	a	a	a	a	a	b	b	b	a	b	a	a	b	b	b	a	a	b	a	b	b	a	a	a	a	b	a	a	b	a	a	b	b	a	b
CABMR_08L05	b	a	b	b	b	b	b	b	a	b	a	a	a	a	b	-	a	a	a	a	b	a	b	b	a	b	-	a	a	a	b	a	a	-	b	a	b	a	b	b	a	a	a	b	a	a	b	b	a
CABMR_08L14	a	a	a	-	a	b	a	a	a	a	a	b	b	a	a	a	a	a	a	b	a	b	b	b	a	b	b	b	b	a	b	b	b	b	b	b	a	a	b	a	b	a	a	a	b	a	b	a	b
ABMR_08L19	a	b	a	a	a	a	a	b	b	a	b	a	b	a	a	a	a	b	a	b	a	b	b	a	b	b	b	b	b	a	b	a	a	b	a	a	b	a	b	b	a	b	a	a	-	b	a	b	a
ABMR_08M07	a	b	a	b	a	b	a	a	a	b	b	a	a	b	b	b	b	b	a	b	b	b	a	b	b	a	a	a	a	a	b	b	b	a	b	b	b	b	b	a	a	b	a	b	b	a	b	b	b
ABMR_08M18	a	b	b	b	b	a	a	b	a	a	a	b	b	b	a	a	a	a	b	a	b	b	b	b	a	b	a	-	a	a	a	a	b	b	b	a	b	b	b	b	b	a	b	a	b	b	b	a	b
ABMR_08M24	a	a	a	b	a	b	a	a	a	a	a	b	b	a	a	a	a	a	a	b	a	b	b	b	a	b	b	-	b	a	b	b	b	b	b	b	a	a	b	a	b	a	a	a	b	a	b	a	b
ABMR_08N09*	a	b	b	b	b	a	a	b	a	a	b	a	b	b	b	a	a	a	b	b	a	b	a	b	b	a	b	b	a	b	a	a	b	b	a	b	a	a	b	b	a	b	b	b	a	a	b	b	a
ABMR_08O13	a	a	a	b	a	b	a	a	a	a	a	b	a	a	a	a	a	a	a	b	a	b	b	b	a	b	b	b	b	a	b	b	b	b	b	b	a	a	b	a	b	a	a	a	b	a	b	a	b
CABMR_08O18	b	b	a	a	b	b	b	a	b	b	a	b	a	b	a	b	a	b	b	a	a	b	a	b	a	a	a	a	b	b	a	a	a	b	a	b	b	b	a	b	b	a	b	a	a	a	b	b	a
ABMR_08O21	a	b	a	b	b	b	a	b	a	b	b	b	b	b	b	a	b	b	b	a	a	a	b	a	b	a	a	a	a	b	a	a	a	a	a	b	b	b	a	b	b	a	b	b	a	b	b	a	a
ABMR_08P02	b	b	a	a	b	b	b	a	b	b	a	b	a	b	a	b	a	b	b	a	a	b	a	b	a	a	a	a	b	b	a	a	a	a	a	b	b	b	a	b	b	a	b	a	a	a	b	b	b
ABMR_08P09	a	b	a	a	b	b	a	b	a	b	b	a	b	b	b	b	b	a	b	a	a	a	b	b	a	b	a	b	a	a	b	a	a	a	a	b	b	a	a	a	a	b	b	b	a	a	a	a	a
ABMR_08P14	a	b	b	a	a	b	a	b	b	a	b	b	a	b	b	a	b	b	b	a	b	a	b	a	b	b	b	a	b	a	b	b	a	a	b	a	b	b	a	b	a	a	a	a	b	b	a	b	b
ABMR_08P15	a	b	a	b	b	b	a	b	a	b	b	b	b	b	b	a	b	b	b	a	a	a	b	a	b	a	a	a	a	b	a	a	a	a	a	b	b	a	a	b	b	a	b	b	a	b	b	a	a
Cag-0003	b	b	b	a	a	b	b	a	b	a	b	b	a	a	a	b	a	b	a	a	a	a	a	a	a	b	b	a	b	a	b	b	b	b	a	a	a	a	a	b	a	a	b	b	a	a	a	a	a
Cag-0006	a	b	a	a	b	b	b	b	b	a	a	b	b	a	b	b	b	a	b	b	a	a	a	a	a	b	a	b	b	b	a	b	a	b	a	a	a	b	a	a	b	a	b	b	b	a	b	a	b
Cag-0009	a	a	a	b	b	a	a	b	a	b	a	a	a	a	a	a	a	b	a	b	b	b	b	b	a	a	b	b	a	a	b	a	a	b	a	a	b	a	b	b	b	b	b	a	a	a	a	b	b
CAHMR_01A08	a	b	b	b	b	a	a	-	a	a	b	a	b	b	b	a	b	a	b	b	b	b	a	b	b	b	b	b	a	b	a	a	b	b	a	-	b	a	a	b	a	b	b	b	a	a	-	b	a
AHMR_01A09	a	a	a	a	a	b	a	b	b	a	b	a	a	a	b	a	a	a	b	b	a	b	a	b	b	a	a	b	b	b	a	b	a	a	b	b	b	a	-	a	a	b	b	b	a	a	b	a	a
AHMR_01A13	b	b	b	b	b	a	b	b	a	b	b	a	b	a	a	a	a	b	a	a	a	b	b	b	b	b	b	a	a	b	b	a	a	a	b	b	a	a	a	b	b	a	b	b	b	b	a	a	b
CAHMR_01A18	b	a	a	b	b	a	b	b	b	a	b	b	b	b	a	b	a	a	b	b	a	a	b	a	a	b	a	a	b	a	b	b	a	b	b	a	b	a	b	a	b	a	b	b	a	b	b	a	b
AHMR_01C04	a	b	b	b	b	a	a	b	a	a	a	b	b	b	a	a	a	a	-	a	a	b	a	b	a	b	b	a	a	a	b	a	b	b	b	a	b	b	b	b	b	a	b	a	-	b	b	a	b
AHMR_01C05	b	b	a	a	b	b	a	a	b	b	b	a	b	a	b	a	b	b	a	a	b	b	b	b	b	a	b	b	a	a	b	b	b	b	b	a	b	a	b	a	a	b	a	b	-	a	a	b	b
CAHMR_01C07*	a	b	b	b	b	a	a	b	a	a	b	a	b	b	b	a	b	a	b	b	b	b	a	b	b	b	b	b	a	-	a	a	b	b	a	b	b	a	a	b	a	b	b	b	a	a	b	b	a
AHMR_01C14	a	b	b	a	a	b	a	b	b	a	b	b	b	b	b	a	b	b	b	a	b	a	a	a	b	a	b	a	-	a	b	b	b	a	b	a	b	b	a	b	a	a	a	a	b	b	a	b	b
CAHMR_01C18	b	a	a	a	-	b	b	b	b	b	a	a	b	b	a	b	b	a	b	a	a	a	a	b	b	a	a	b	a	a	a	a	a	a	a	b	b	a	b	a	b	b	b	b	a	a	a	b	a
AHMR_01D07	b	b	b	a	a	b	b	a	b	a	a	a	a	b	b	b	b	a	a	b	a	a	b	b	a	b	b	a	b	a	b	a	a	b	a	a	-	b	a	b	b	a	a	b	b	b	a	a	b
AHMR_01D11**	a	b	b	b	b	a	a	b	a	a	b	a	b	b	b	a	b	a	b	b	b	b	b	b	b	b	b	b	a	b	a	a	b	b	a	b	b	a	a	b	a	b	b	b	a	a	b	b	a
CAHMR_01F01	b	a	a	b	b	b	a	a	a	a	b	a	b	b	a	b	a	a	b	b	b	b	a	b	b	b	a	a	a	b	b	a	b	b	a	b	b	b	a	b	b	a	a	b	a	b	a	b	a
AHMR_01F17	a	b	a	b	b	a	a	b	a	a	a	b	b	b	a	a	a	a	a	a	b	b	b	b	a	b	a	b	a	a	a	a	a	b	b	a	a	b	b	b	b	a	b	a	b	-	b	a	b
AHMR_01F19	a	a	a	b	a	a	b	a	a	b	a	a	b	a	a	a	a	a	a	b	a	a	a	a	a	b	a	a	a	b	a	a	b	a	b	b	b	b	b	a	b	b	b	b	a	b	b	a	b
CAHMR_01H06	a	b	a	a	b	b	b	b	b	a	a	b	-	a	b	-	-	a	b	b	a	a	a	a	a	b	a	b	b	b	a	b	a	b	a	a	a	b	a	a	b	a	b	b	b	a	b	a	b
AHMR_01H09	b	b	b	a	a	b	b	a	-	a	a	a	a	-	b	b	b	a	a	b	a	-	b	b	a	b	b	a	b	a	b	a	a	b	a	a	b	b	a	b	b	a	a	-	b	b	a	a	b
AHMR_01J11	b	b	a	a	b	a	a	a	b	a	b	b	a	a	b	b	a	b	a	a	b	a	a	a	a	b	b	b	a	b	b	b	a	a	b	a	a	a	b	a	b	b	b	a	b	b	b	a	a
AHMR_01J17	a	b	a	b	b	a	b	a	b	b	b	b	a	a	b	b	a	a	b	b	a	b	b	b	a	a	b	a	a	b	b	b	b	a	a	a	a	a	b	a	a	b	a	b	b	a	a	b	a
AHMR_01J19	b	b	b	a	a	b	b	a	b	a	b	b	b	b	a	b	a	b	a	a	a	b	b	a	a	b	b	a	b	a	b	b	b	a	b	a	a	a	b	b	a	a	a	b	b	a	a	a	b
AHMR_01K09	b	a	a	a	a	a	a	b	a	a	a	a	b	b	a	a	a	b	a	b	b	b	b	a	a	b	a	a	b	b	b	b	b	b	a	b	b	a	a	a	b	b	a	a	b	a	a	a	b
AHMR_01K10	b	a	-	b	b	b	b	b	a	a	a	a	a	b	b	b	a	a	a	a	b	a	b	b	a	-	b	a	-	a	b	a	a	a	a	b	b	b	-	-	a	a	a	-	a	b	a	b	a
CAHMR_01K12**	b	a	b	a	a	a	a	b	a	a	b	a	a	b	a	a	a	b	b	b	a	b	b	a	a	b	a	a	a	b	b	-	b	b	a	b	b	a	a	b	b	a	a	a	b	a	a	b	b
AHMR_01L11	a	-	-	a	b	a	-	a	-	a	b	a	-	a	a	a	b	b	b	a	b	a	b	b	b	-	b	b	a	-	b	-	b	a	b	a	b	a	b	a	a	a	a	a	a	b	b	b	a
AHMR_01L13	a	a	a	b	a	b	a	a	a	a	a	b	b	a	a	a	a	a	a	b	a	b	b	b	a	b	b	b	b	a	-	b	b	b	b	b	a	a	b	a	b	a	a	a	b	a	b	a	b
AHMR_01M16	a	b	a	a	b	b	b	b	a	a	b	b	a	b	b	b	b	a	b	b	a	a	a	a	a	b	a	b	b	b	a	b	a	b	b	a	b	b	b	a	b	a	b	b	b	a	b	a	b
CAHMR_01N01	a	a	a	b	a	b	a	b	b	a	b	a	a	a	b	b	b	a	b	b	a	b	a	a	b	a	a	b	b	b	b	b	b	a	a	b	b	b	b	a	b	b	b	b	a	a	b	a	a
CAHMR_01N11	b	a	a	a	a	a	a	b	a	a	a	a	b	b	a	a	a	b	a	b	b	b	b	a	a	b	a	a	a	b	b	b	b	b	a	b	b	a	a	a	b	b	a	a	b	a	a	b	b
CAHMR_01N23	a	a	a	b	a	b	a	a	a	a	a	b	b	a	a	a	a	a	a	b	a	b	b	b	a	b	b	b	b	a	b	b	b	b	b	b	a	a	b	a	b	a	a	a	b	a	b	a	b
CAHMR_01O02	b	a	a	a	a	a	a	b	a	b	a	a	b	b	a	a	a	b	a	b	a	b	b	a	a	b	a	a	a	b	b	b	b	b	a	b	b	a	a	a	b	b	a	a	b	a	a	b	b
AHMR_02A08	a	b	b	b	a	a	a	b	b	b	a	a	a	b	-	a	a	a	a	b	a	a	a	a	-	a	b	b	a	a	a	a	b	a	b	a	a	b	b	a	b	b	a	b	b	b	a	b	a
CAHMR_02A19	b	b	b	a	a	b	b	a	b	a	a	a	a	b	b	b	b	a	a	b	a	a	b	b	a	b	b	a	b	a	b	a	a	b	a	a	b	b	a	b	b	a	a	b	b	b	a	a	b
AHMR_02B03	a	a	b	b	a	b	a	b	b	a	b	a	a	b	a	a	a	b	a	b	b	b	a	a	b	a	b	a	b	a	b	b	a	b	b	a	a	a	a	b	b	a	a	a	b	a	a	b	a
AHMR_02B11	a	b	-	a	a	a	b	a	b	a	b	b	b	b	b	b	a	a	a	-	a	b	b	b	a	a	b	a	a	b	b	b	b	a	a	a	a	a	b	a	a	b	a	b	b	a	a	a	a
CAHMR_02C06	b	a	a	a	b	b	a	b	b	b	a	a	b	b	a	b	a	a	b	a	a	a	b	b	a	a	a	b	a	b	b	a	a	a	a	b	b	b	a	a	b	b	b	b	a	a	a	b	a
AHMR_02C18	a	a	a	b	a	a	a	a	a	b	a	a	b	a	a	a	a	a	a	b	a	a	a	a	a	b	a	a	a	b	a	a	b	a	b	b	a	b	b	a	b	b	b	b	b	b	b	a	b
CAHMR_02D04	a	a	b	b	b	a	b	a	b	b	a	a	a	b	b	a	b	b	b	a	-	b	b	b	b	a	b	b	b	b	a	b	a	a	a	b	b	b	b	a	a	b	b	b	a	b	b	a	a
CAHMR_02G20*	b	b	a	a	b	a	a	b	b	a	b	b	a	a	b	b	a	b	a	a	b	a	a	a	b	b	b	b	b	b	b	b	a	a	b	a	a	b	a	b	b	a	a	a	b	b	b	b	a
AHMR_02H08	a	a	a	a	a	b	a	b	b	a	b	a	a	a	b	a	a	a	b	b	a	b	a	b	b	a	a	b	b	b	a	b	a	a	b	b	b	a	b	a	a	b	b	b	a	a	b	a	a
CAHMR_02H17	a	b	a	a	a	b	b	b	b	a	a	b	a	a	a	b	a	b	b	a	a	b	a	a	a	a	b	a	b	b	a	a	b	b	b	a	b	b	a	a	b	b	b	a	a	b	a	b	b
AHMR_02I13	a	a	a	a	a	b	b	a	b	b	b	b	a	b	b	a	a	a	b	b	a	b	b	b	a	b	b	b	a	a	b	b	b	b	b	b	a	a	b	a	b	b	a	a	a	a	a	b	a
CAHMR_02J16	a	b	b	a	b	a	a	a	b	a	b	a	b	a	b	a	b	b	b	a	b	a	b	b	b	a	b	b	a	a	b	b	b	a	b	a	b	a	b	a	a	a	b	a	a	b	b	b	a
AHMR_02K05	a	-	-	-	b	b	-	b	a	a	b	b	-	b	b	b	a	a	-	b	a	a	a	a	a	-	a	-	b	-	a	-	a	b	b	a	b	b	b	a	b	a	b	b	-	-	b	a	b
AHMR_02K20	b	b	a	b	a	a	a	a	b	b	b	b	a	a	a	b	a	b	a	b	b	a	b	a	a	a	b	a	a	a	b	b	a	a	a	a	b	b	b	b	a	b	b	a	a	b	a	a	b
AHMR_02L02	b	b	b	a	a	b	-	a	-	a	a	a	a	-	b	b	b	a	a	b	a	a	b	b	a	b	-	a	b	a	b	a	a	b	a	a	b	b	a	b	b	a	a	-	b	b	a	a	b
CAHMR_02M02	b	b	b	b	b	a	b	b	a	b	b	a	b	a	a	a	a	b	a	a	a	b	b	b	b	b	b	a	a	b	b	a	a	a	b	b	a	a	a	b	b	a	b	b	b	b	a	a	b
AHMR_02M23	b	b	a	b	b	b	a	b	a	b	b	b	a	a	b	b	a	a	a	a	b	a	b	b	a	b	b	a	a	a	a	b	a	b	b	a	b	a	-	b	a	a	a	a	a	a	b	b	a
AHMR_02N03	b	b	b	a	a	b	b	a	b	a	a	b	b	-	a	b	b	a	b	a	a	b	b	b	a	b	a	a	b	a	b	b	b	a	b	a	a	a	b	a	a	b	a	b	b	a	a	a	a
CAHMR_02N09	a	b	a	b	a	b	a	a	a	b	b	a	b	b	b	b	b	b	a	b	b	b	a	b	b	a	a	a	a	a	b	b	b	a	b	b	b	b	a	a	a	b	a	b	b	a	b	b	b
AHMR_02O18	b	b	b	b	b	a	b	b	-	b	a	b	b	-	a	b	-	a	a	a	a	a	b	b	a	b	a	b	-	-	-	-	a	b	b	a	a	b	b	b	b	a	a	a	b	a	b	b	a
CAHMR_02O22	a	a	a	b	b	a	a	b	a	b	a	a	a	a	a	a	a	b	a	b	b	b	b	b	a	a	b	b	a	a	b	a	a	b	a	a	b	a	b	b	b	b	b	a	a	a	a	b	b
CAHMR_02P01***	b	b	a	b	a	b	b	a	a	a	b	b	a	b	a	b	a	a	b	b	b	b	a	b	b	a	b	a	b	b	b	b	b	b	b	b	b	b	b	b	b	a	a	b	b	b	a	a	a
CAHMR_02P17	a	a	a	b	a	b	a	b	b	a	b	a	a	a	b	a	a	a	b	b	a	b	a	b	b	a	a	b	b	b	a	b	a	a	b	b	b	a	b	a	a	b	b	b	a	a	-	a	a
CAHMR_03A06	a	b	b	b	b	a	a	b	a	a	a	b	b	b	a	a	a	a	b	a	b	b	b	b	a	b	b	b	a	a	a	a	b	b	b	a	b	b	b	b	b	a	b	a	b	b	b	a	b
AHMR_03A12	b	b	a	b	b	b	a	a	a	a	b	a	b	b	a	b	a	a	b	b	b	b	a	b	b	b	a	a	a	b	b	a	b	b	a	b	b	b	a	b	b	a	a	a	b	a	a	a	a
AHMR_03A13	a	b	b	a	a	a	b	a	b	b	b	b	b	b	b	b	a	a	a	b	a	b	b	b	a	a	b	a	a	b	b	b	b	a	a	a	a	a	b	a	a	b	a	b	b	a	a	-	a
CAHMR_03A17	a	b	b	a	a	a	b	a	b	a	b	b	b	b	b	b	a	a	a	b	a	b	b	b	a	a	b	a	a	b	b	b	b	a	a	a	a	a	b	a	a	b	a	b	b	a	a	a	a
AHMR_03A21	b	b	a	a	b	b	a	b	b	b	a	b	b	b	b	b	a	a	a	a	a	b	b	a	b	b	b	a	a	a	b	a	a	a	b	b	a	b	a	a	a	a	b	b	b	a	b	a	a
CAHMR_03A23*	b	b	b	a	b	b	b	b	b	b	a	b	a	b	b	b	a	b	b	a	a	b	a	a	a	a	a	b	b	b	b	b	a	b	a	b	b	b	a	b	b	a	b	b	-	a	b	b	b
AHMR_03B19	b	a	b	b	b	b	a	b	a	b	a	a	a	a	b	b	a	a	a	a	b	a	b	b	a	b	b	a	a	a	b	a	a	b	b	a	b	a	b	b	a	a	a	b	a	a	b	b	a
AHMR_03B22**	b	a	a	a	a	a	b	a	b	b	b	a	b	b	b	b	b	b	a	b	a	b	a	b	b	b	a	a	b	b	b	b	a	-	b	a	b	a	b	-	a	b	b	b	-	-	b	b	a
CAHMR_03C06	b	b	a	b	b	b	a	a	a	a	b	a	b	b	a	b	a	a	b	b	b	b	a	b	b	b	a	a	a	b	b	a	b	b	a	b	b	b	a	b	b	a	a	a	a	a	a	a	a
AHMR_03C10	a	-	a	b	a	b	a	a	a	b	b	a	b	-	b	b	b	b	a	b	b	b	a	b	b	a	a	a	a	a	b	b	b	b	b	b	b	b	a	a	a	b	a	b	b	a	b	b	b
AHMR_03C18	a	a	a	b	a	b	a	a	a	a	a	b	-	a	a	a	a	a	a	b	a	b	b	b	a	b	b	b	b	a	b	b	b	b	b	b	a	a	b	a	b	a	a	a	b	a	b	a	b
AHMR_03D06	a	b	a	-	b	a	a	b	a	a	a	a	-	a	a	a	b	b	a	a	b	b	b	b	a	b	a	b	a	a	a	a	a	b	b	a	a	b	b	b	b	a	a	a	b	b	b	b	b
AHMR_03E08	b	b	a	b	b	a	a	a	b	a	b	a	b	a	b	a	b	b	a	a	b	a	b	b	b	a	b	b	a	a	b	b	b	a	b	a	b	a	b	a	a	b	b	b	a	a	b	b	b
CAHMR_03E19	a	b	a	a	b	-	b	b	b	a	b	b	a	a	b	b	b	a	b	b	a	a	a	a	a	b	a	b	b	b	a	b	a	b	a	a	a	b	a	a	b	a	b	b	b	a	-	a	b
CAHMR_03F08	a	a	a	b	a	a	b	a	a	b	a	a	b	a	a	a	a	a	a	b	a	a	a	a	a	b	a	a	a	b	a	a	b	a	b	b	b	b	b	a	b	b	b	b	a	b	b	a	b
CAHMR_03F10	b	b	-	b	a	-	a	a	b	b	b	a	a	-	b	a	a	b	a	b	b	b	a	b	b	a	a	a	a	a	b	a	a	a	a	a	a	b	a	a	b	a	b	a	a	a	b	a	a
AHMR_03G13	a	b	a	a	b	b	a	b	a	b	b	a	b	b	a	b	b	a	a	a	a	a	b	b	a	b	a	b	a	b	b	a	a	a	a	b	b	a	a	a	a	b	b	b	a	a	a	a	a
CAHMR_03H08	b	b	a	a	b	b	b	a	b	b	b	a	a	b	a	b	a	b	b	a	a	b	a	b	a	a	a	a	b	b	a	a	a	a	a	b	-	b	a	b	b	a	b	a	a	a	b	b	b
CAHMR_03H20	a	a	b	b	a	b	a	b	b	a	b	b	a	b	a	a	b	b	a	a	b	b	a	a	b	a	b	a	b	a	b	b	b	b	b	a	a	a	a	b	b	a	a	a	b	b	a	b	a
CAHMR_03H24	a	a	b	b	a	b	a	b	b	a	b	b	a	b	a	a	b	b	a	a	b	b	a	a	b	a	b	a	b	a	b	b	b	b	b	a	a	a	a	b	b	a	a	a	b	b	a	b	a
CAHMR_03I02**	b	b	a	b	a	b	b	a	a	a	b	b	a	b	a	b	a	a	b	b	b	b	a	b	b	a	b	a	b	b	b	b	b	b	b	b	b	b	b	b	b	a	a	b	b	b	a	a	a
CAHMR_03I13	a	b	a	a	a	a	a	b	b	a	b	a	b	a	a	a	a	b	a	b	a	b	b	a	b	b	b	b	b	a	b	a	a	b	a	a	b	a	b	b	a	b	a	a	b	b	a	b	a
AHMR_03I22	b	b	b	a	a	b	b	a	b	a	b	b	b	b	a	b	b	a	b	a	a	b	b	a	a	b	b	-	b	a	b	b	b	a	b	a	a	a	b	a	a	b	a	b	b	a	a	a	b
AHMR_03J22	b	a	-	b	a	a	b	b	a	b	b	a	b	-	b	a	a	a	a	a	-	a	b	b	a	b	a	a	b	b	a	b	b	a	a	b	a	b	b	b	a	a	b	b	a	a	b	a	a
CAHMR_03J23*	b	a	b	a	a	a	a	b	a	a	b	a	a	a	a	a	a	b	b	a	a	a	a	a	a	b	a	b	b	b	b	a	b	b	b	b	a	a	b	b	b	a	a	-	a	a	b	b	a
CAHMR_03K05	a	b	a	b	b	a	-	b	a	b	a	a	a	a	a	a	a	b	b	b	b	b	a	b	a	b	b	b	b	a	b	a	a	b	a	a	a	a	a	a	b	b	a	a	b	a	b	b	-
AHMR_03K08	a	-	-	b	b	a	-	b	a	a	a	b	-	b	a	a	a	a	a	a	b	b	b	b	a	-	a	b	a	a	a	-	a	b	b	a	a	b	b	b	b	a	b	-	b	b	b	a	b
CAHMR_03K09	a	b	a	a	a	a	a	b	a	a	a	a	b	b	a	a	a	b	a	b	b	b	b	a	b	b	a	a	b	b	b	a	b	b	a	a	b	a	b	b	b	b	a	a	b	b	a	a	b
AHMR_03K18	b	b	b	a	a	b	b	a	b	a	a	a	a	b	b	b	b	a	a	b	a	a	b	b	a	b	b	a	b	a	b	a	a	b	a	a	b	b	a	b	b	a	a	b	b	b	a	a	b
CAHMR_03L03	b	b	a	a	a	a	a	a	b	a	b	b	a	a	b	b	a	b	a	a	b	a	a	b	a	-	b	b	a	b	b	b	a	a	b	a	a	a	b	a	b	b	b	a	b	b	b	a	a
AHMR_03L16	b	a	a	a	b	b	a	b	b	b	a	a	b	b	a	b	a	a	b	a	a	a	b	b	a	a	a	b	a	b	b	a	a	a	a	b	b	b	a	a	b	b	b	b	a	a	a	b	a
CAHMR_03M24	a	a	a	b	a	a	b	a	a	b	a	a	b	a	a	a	a	a	a	b	a	a	a	a	a	b	a	a	a	b	a	a	b	a	b	b	b	b	b	a	b	b	b	b	a	b	b	a	b
AHMR_03N09	b	b	-	a	a	b	b	a	b	a	a	a	a	b	b	b	b	a	a	b	a	a	b	b	a	b	b	a	b	a	b	a	a	b	a	a	b	b	a	b	b	a	a	b	b	b	a	a	b
AHMR_03N13	a	b	a	a	b	b	b	a	b	b	a	b	a	a	a	-	b	b	b	b	a	b	b	b	b	a	b	b	a	a	a	a	a	a	a	a	b	a	b	b	b	a	a	a	b	b	b	b	b
AHMR_03N15	b	b	a	b	b	b	a	a	a	a	b	a	b	b	a	b	a	a	b	b	b	b	a	a	b	b	a	a	a	b	b	a	b	b	a	b	b	b	a	b	b	a	a	a	a	a	a	a	a
CAHMR_03N21	a	b	a	b	b	a	b	b	a	b	a	a	b	a	a	a	a	b	b	b	b	b	a	b	a	b	b	b	b	a	b	a	a	b	a	a	a	a	a	a	b	b	b	a	a	a	a	b	b
AHMR_03N23	a	b	-	a	b	a	a	-	b	a	b	a	b	a	a	a	b	b	b	a	b	a	b	b	b	a	b	b	a	a	b	b	b	a	b	a	b	a	b	a	a	a	b	a	a	b	b	b	a
CAHMR_03N24	a	b	b	b	a	a	a	b	b	b	a	a	a	b	b	a	a	a	a	b	a	a	a	a	b	a	b	b	a	a	a	a	b	a	b	a	a	b	b	a	b	b	a	b	b	b	a	b	a
CAHMR_03O04	b	a	a	a	a	a	a	b	a	a	a	a	b	b	a	a	a	b	a	b	b	b	b	a	a	b	a	a	b	b	b	b	b	b	a	b	b	a	-	b	b	b	a	a	b	a	a	a	b
AHMR_03O06	a	b	a	b	b	a	b	b	a	a	a	a	b	a	a	a	b	b	a	a	b	b	b	b	a	b	a	b	a	a	a	a	a	b	b	a	a	b	b	b	b	a	a	a	b	b	b	b	b
AHMR_03O19	a	b	b	b	b	a	b	b	a	a	a	a	b	a	a	a	b	b	a	a	-	b	a	b	a	a	a	b	a	a	a	a	a	b	b	a	a	b	b	b	b	a	a	a	b	b	b	b	b
CAHMR_03P06	b	b	a	a	b	a	a	b	b	a	b	b	a	a	b	b	a	b	a	a	b	a	a	a	b	-	b	b	-	-	b	b	a	a	b	a	a	b	a	b	b	a	a	a	b	b	b	b	a
CAHMR_03P24	a	a	a	b	a	b	a	b	b	a	b	a	a	a	b	a	a	a	b	b	a	b	a	b	b	a	a	b	b	b	a	b	a	a	b	b	b	a	b	a	a	b	b	b	a	a	b	a	a
AHMR_04A17	b	b	a	b	a	a	a	a	b	b	b	b	a	a	a	b	a	b	a	b	b	a	b	a	a	a	b	a	a	a	b	b	a	a	a	a	b	b	b	b	a	b	b	a	a	b	a	a	b
CAHMR_04B11*	b	b	a	a	a	b	a	b	b	a	b	b	a	b	b	a	b	b	b	a	b	a	b	a	b	b	b	a	b	b	b	b	a	a	b	a	b	b	a	b	a	a	a	a	b	b	a	b	b
AHMR_04C03	a	a	a	b	a	b	a	a	a	a	a	b	b	a	a	a	a	a	a	b	a	b	b	b	a	b	b	b	b	a	b	b	b	b	b	b	a	a	b	a	b	a	a	a	b	a	-	a	b
AHMR_04C21	a	b	b	a	a	a	b	a	b	a	b	b	b	-	b	b	a	a	a	b	a	b	b	b	a	a	b	a	a	b	b	b	b	a	a	a	a	a	-	a	a	b	a	b	b	a	a	a	a
CAHMR_04C22	b	b	a	a	b	b	b	b	b	b	a	a	a	b	b	b	b	b	b	a	a	a	a	b	b	a	a	b	a	a	a	a	a	a	a	b	b	a	b	a	b	b	b	b	a	a	a	b	a
AHMR_04C23*	b	a	a	a	b	b	a	b	b	b	a	a	b	b	a	b	b	a	b	a	a	a	a	b	b	a	a	b	a	a	a	a	a	a	a	b	b	a	b	a	b	b	b	b	a	a	a	b	a
CAHMR_04D02	b	b	b	a	a	b	b	a	b	a	a	b	b	b	b	b	a	a	b	b	a	b	b	b	a	a	a	a	b	a	b	b	b	a	a	a	a	a	b	a	a	b	a	b	b	a	a	a	a
CAHMR_04D20	a	b	a	a	a	a	a	b	a	a	a	a	b	b	a	a	a	b	a	b	b	b	b	a	b	b	a	a	b	b	b	a	b	b	a	a	-	a	b	b	b	b	a	a	b	b	a	a	b
AHMR_04E06	a	b	a	a	a	a	a	b	b	a	b	a	b	a	a	a	a	b	a	b	a	b	b	a	b	-	b	b	-	-	b	a	a	b	a	a	b	a	b	b	a	b	a	a	b	b	a	b	a
CAHMR_04E23	b	b	b	-	a	a	a	b	a	b	a	b	b	b	b	a	b	b	b	b	a	a	b	a	b	a	a	b	b	b	b	a	a	b	b	a	a	b	b	b	a	b	b	b	a	b	b	a	a
CAHMR_04F07	b	a	a	b	b	b	a	a	a	a	b	a	b	b	a	b	a	a	b	b	b	b	a	b	b	b	a	a	a	b	b	a	b	b	a	b	b	b	a	b	b	a	a	b	a	b	a	a	a
CAHMR_04F10	b	b	a	a	b	a	a	a	b	a	b	b	a	a	b	b	a	b	a	a	b	a	a	a	b	-	b	b	a	b	b	b	a	a	b	a	a	b	a	a	b	b	a	a	b	b	b	b	a
AHMR_04F23	a	b	b	b	b	a	b	b	a	a	a	a	b	a	a	a	b	b	a	a	b	b	a	b	a	a	a	b	a	a	a	a	a	b	b	a	a	b	b	b	b	a	a	a	b	b	b	b	b
CAHMR_04G23	a	b	b	b	b	b	a	b	a	a	a	-	b	a	b	a	b	b	a	b	b	b	b	b	b	b	b	b	a	b	a	a	b	b	a	a	b	a	b	b	a	b	b	a	a	b	b	a	a
AHMR_04H11	b	b	b	b	b	a	b	b	b	b	a	b	b	b	a	a	a	a	a	b	a	a	b	b	a	b	b	b	b	a	b	b	a	b	b	a	a	b	b	b	b	a	a	a	b	a	b	b	a
AHMR_04H12**	b	b	a	a	b	b	a	b	b	a	b	b	a	a	b	b	b	b	a	a	b	a	a	a	b	b	b	b	b	b	b	b	a	a	b	a	b	b	a	b	b	a	a	a	b	b	a	b	b
AHMR_04I03	a	a	a	a	a	b	a	b	b	a	b	a	a	a	b	a	a	a	b	b	a	b	a	b	b	a	a	b	b	b	a	b	a	a	b	b	b	a	b	a	a	b	-	b	a	a	b	a	a
CAHMR_04I09	b	b	a	a	b	b	b	a	b	b	b	a	a	b	a	b	b	b	b	b	a	b	a	b	a	a	a	a	b	b	a	b	a	a	a	b	b	b	a	b	b	a	a	a	a	a	a	b	b
CAHMR_04I10	a	b	a	b	a	b	a	a	a	b	b	a	b	b	b	b	b	b	a	b	b	b	a	b	b	a	a	a	a	a	b	b	b	b	b	b	b	b	a	a	a	b	a	b	b	a	b	b	b
CAHMR_04I12	b	b	-	b	a	b	a	a	b	b	b	a	a	b	b	a	a	b	a	-	b	b	a	b	b	a	a	a	a	a	b	a	a	a	a	a	a	b	a	a	b	a	b	a	a	a	b	a	a
AHMR_04I20	b	b	b	a	a	b	b	a	b	a	a	a	a	b	b	b	b	a	a	b	a	a	b	b	a	b	b	a	b	a	b	a	a	b	a	a	b	b	a	b	b	a	a	b	b	b	a	a	b
CAHMR_04J17	a	a	a	b	a	b	a	b	a	a	b	a	b	b	b	b	b	b	a	b	b	b	b	a	b	a	a	b	a	b	b	b	b	b	a	b	b	b	b	a	b	b	b	b	a	a	b	a	a
AHMR_04K19	a	b	b	a	b	b	b	b	b	b	b	b	a	b	b	a	a	a	a	b	a	a	a	a	a	b	a	b	a	-	a	b	a	b	b	b	b	b	b	a	b	b	b	b	a	a	b	a	b
CAHMR_04L02	a	b	a	b	b	b	a	b	a	b	b	b	b	b	b	a	b	b	b	a	a	a	b	a	b	a	a	a	a	b	a	a	a	a	a	b	b	a	a	b	b	a	b	b	a	b	b	a	a
AHMR_04L05	b	b	b	a	a	b	b	a	b	a	a	a	a	b	b	b	b	a	a	b	a	a	b	b	a	b	b	a	b	a	b	a	a	b	a	a	b	b	a	b	b	a	a	b	b	b	a	a	b
AHMR_04M01	a	a	a	a	a	b	a	b	b	a	b	a	a	a	b	a	a	a	b	b	a	b	a	b	b	a	a	b	b	b	a	b	a	a	b	b	b	a	b	a	a	b	b	b	a	a	b	a	a
AHMR_04M04	a	b	a	a	a	b	a	b	b	a	b	b	a	b	b	a	b	b	b	a	b	a	b	a	b	b	b	a	b	b	b	b	a	a	b	a	b	b	a	b	a	a	a	a	-	b	a	b	b
AHMR_04N02	b	a	a	b	a	b	b	b	b	a	a	b	b	a	a	a	a	a	a	b	a	a	b	b	a	b	b	b	b	a	b	b	b	b	b	b	a	a	b	a	b	a	a	a	b	a	b	a	b
CAHMR_04N24	a	b	a	a	a	b	b	b	b	a	a	b	a	a	a	b	a	b	b	a	a	b	a	a	a	a	b	a	b	b	a	a	b	b	b	a	b	b	a	a	b	b	b	a	a	b	a	b	b
AHMR_04O20	a	b	a	a	b	b	a	b	a	b	b	a	b	b	b	-	b	a	b	a	a	a	b	b	a	b	a	b	a	a	b	a	a	a	a	b	-	a	a	a	a	b	b	b	a	a	a	a	a
AHMR_04P06	a	-	-	a	a	b	-	b	a	a	b	a	-	a	b	a	a	a	b	b	a	b	a	b	a	-	a	a	b	-	a	-	a	a	b	b	b	a	b	a	a	b	b	b	a	a	b	a	a
AHMR_04P17	a	b	a	b	a	-	a	a	a	b	b	a	a	b	b	b	b	b	a	b	b	b	a	b	b	a	a	a	a	a	b	b	b	a	b	b	b	b	b	a	a	b	a	b	b	a	b	b	b
CAHMR_05B20	a	b	b	a	b	a	a	a	b	b	b	b	a	a	a	b	b	b	a	b	b	a	b	b	a	a	a	b	b	a	b	a	b	a	a	a	a	b	b	a	a	a	a	a	a	b	b	b	a
AHMR_05C17*	a	b	b	b	b	a	-	b	a	a	b	a	-	b	b	a	b	a	b	b	a	b	a	b	b	-	b	b	-	-	-	-	b	b	a	b	b	a	a	b	a	b	b	b	a	a	-	b	a
AHMR_05C18	a	b	a	a	b	b	b	b	b	-	b	b	b	a	b	b	b	a	b	b	a	a	a	a	a	b	a	b	b	b	a	b	a	b	a	a	a	b	a	a	b	a	b	b	b	a	b	-	b
CAHMR_05C20***	b	b	a	b	a	b	b	a	a	a	b	b	a	b	a	b	a	a	b	b	b	b	a	b	b	a	b	a	b	b	b	b	b	b	b	b	b	b	b	b	b	a	a	b	b	b	a	a	a
AHMR_05D01	b	b	b	a	a	b	b	a	b	a	a	a	a	b	b	b	b	a	a	b	a	a	b	b	a	b	b	a	b	a	b	a	a	b	a	a	b	b	a	b	b	a	a	b	b	b	a	a	b
CAHMR_05D06	a	b	a	b	a	b	a	a	a	b	b	a	-	b	b	b	b	b	a	b	b	b	a	b	b	a	a	a	-	a	-	-	b	a	b	b	b	b	a	a	a	b	a	b	b	a	b	b	b
AHMR_05D09	b	b	a	b	b	b	a	a	a	a	b	a	b	b	a	b	a	a	b	b	b	b	a	a	b	b	a	a	a	b	b	a	b	b	a	b	b	b	a	b	a	a	a	a	a	a	a	a	a
AHMR_05D13	a	b	b	b	-	a	b	b	a	a	b	b	b	a	a	a	a	a	a	a	a	a	a	b	a	b	a	b	b	a	b	a	a	b	b	a	b	b	b	b	b	a	b	a	a	b	b	a	b
CAHMR_05D24	a	b	b	a	a	a	b	a	b	a	b	b	b	b	b	b	a	a	a	b	a	b	b	b	a	a	b	a	a	b	b	b	b	a	a	a	a	a	b	a	a	b	a	b	b	a	a	a	a
CAHMR_05E03	a	b	a	b	a	b	a	a	a	b	b	a	b	b	b	b	b	b	a	b	b	b	a	b	b	a	a	a	a	a	b	b	b	b	b	b	b	b	a	a	a	b	a	b	b	a	b	b	b
CAHMR_05E06***	b	b	a	b	a	b	b	b	a	a	b	b	a	b	a	b	b	a	b	b	b	b	a	b	b	a	b	a	b	b	b	b	a	b	b	b	b	b	b	b	a	a	a	b	b	b	a	a	a
AHMR_05E23**	a	b	b	b	b	a	a	b	a	a	b	a	b	b	b	a	a	a	b	b	a	b	a	b	b	a	b	b	a	a	b	a	a	b	a	b	a	a	b	b	b	a	a	b	b	a	b	b	a
AHMR_05F05	a	a	a	b	a	a	b	a	a	b	a	a	b	a	a	a	a	a	a	b	a	a	a	a	a	b	a	a	a	b	a	a	b	a	b	b	b	b	b	a	b	b	b	b	a	b	b	a	b
AHMR_05G04	a	-	b	b	b	a	a	b	a	a	b	-	b	b	b	a	b	a	b	b	a	b	a	b	b	b	b	b	a	-	a	a	b	b	a	b	b	a	a	b	a	-	b	b	a	a	b	b	a
AHMR_05G06	a	b	b	b	b	a	b	b	a	a	a	a	b	a	a	a	b	b	a	a	b	b	a	b	a	a	a	b	a	a	a	a	a	b	b	a	a	b	b	b	b	a	a	a	b	b	-	b	b
CAHMR_05G10	a	a	b	b	a	b	a	b	b	a	b	b	a	b	a	a	b	b	a	a	b	b	a	a	b	a	b	a	b	a	b	b	b	b	b	a	a	a	a	b	b	a	a	a	b	b	a	b	a
AHMR_05G11	a	a	a	b	a	a	b	a	a	b	a	a	b	a	a	a	a	a	a	b	a	a	a	a	a	b	a	a	a	b	a	a	b	a	b	b	b	b	b	a	b	b	b	b	a	b	b	a	b
CAHMR_05H16	b	a	a	a	b	-	a	b	b	b	a	a	b	b	a	b	a	a	b	a	a	a	b	b	a	a	a	b	a	b	b	a	a	a	a	b	b	b	a	a	b	b	b	b	a	a	a	b	a
AHMR_05H22*******	a	a	a	a	a	b	a	a	a	a	b	b	a	a	a	b	a	a	a	a	a	a	a	a	a	a	a	a	a	a	b	a	a	a	a	b	a	a	a	a	a	a	a	a	b	a	a	a	a
AHMR_05I02	b	b	b	b	b	a	b	b	a	b	b	b	b	a	a	a	a	b	a	a	a	b	b	b	b	b	b	a	a	b	a	a	a	a	b	b	a	a	a	b	b	a	b	b	b	b	a	a	b
CAHMR_05I04	b	a	a	a	b	b	a	b	b	b	a	a	b	b	a	b	a	a	b	a	a	a	b	b	a	a	a	b	a	b	a	a	a	a	a	b	b	b	a	a	b	b	b	b	a	a	a	b	a
AHMR_05I05	b	a	a	a	b	b	a	b	b	b	a	a	b	b	a	b	a	a	b	a	a	a	b	b	a	a	a	b	a	b	b	a	a	a	a	b	b	b	a	a	b	b	b	b	a	a	a	b	a
AHMR_05I22	a	b	b	b	a	a	a	b	b	a	-	a	a	b	b	a	a	a	a	b	a	-	a	-	b	a	b	b	a	a	b	a	-	-	b	a	a	-	b	a	b	b	a	-	-	b	a	b	a
AHMR_05J13*	b	a	b	a	a	a	a	b	a	b	b	a	a	a	a	a	a	b	b	b	a	b	b	a	a	b	a	a	a	b	b	b	b	b	a	b	b	a	a	a	b	b	a	a	-	a	a	b	b
AHMR_05J17	a	b	a	a	a	a	a	b	b	a	b	a	b	a	a	a	a	b	a	b	a	b	b	a	b	b	b	b	b	a	b	a	a	b	a	a	b	a	b	b	a	b	a	a	b	b	a	b	a
AHMR_05J22	a	b	a	b	b	a	b	b	b	b	b	a	a	a	a	a	a	a	b	b	b	a	a	b	a	a	a	a	b	a	b	b	b	a	a	a	a	a	b	a	a	b	a	a	b	a	b	a	a
AHMR_05J23	a	b	b	a	a	b	b	b	b	b	b	b	a	b	b	a	a	a	b	b	a	a	a	a	a	b	a	b	a	b	a	b	a	b	a	b	b	b	b	a	b	b	b	b	a	a	b	a	b
AHMR_05K03	b	a	a	a	b	-	a	b	b	b	a	a	b	b	a	b	a	a	b	a	a	a	b	b	a	a	a	b	a	b	a	a	a	a	a	b	b	a	b	a	b	b	b	b	-	-	a	b	a
AHMR_05K06	b	b	b	a	a	b	b	a	b	a	a	a	a	b	b	b	b	a	a	b	a	a	b	b	a	b	b	a	b	a	b	a	a	b	a	a	b	b	a	b	b	a	a	b	b	b	a	a	b
AHMR_05K07	a	a	a	b	a	b	a	b	b	a	b	a	a	a	b	b	b	a	b	b	a	b	a	a	b	a	a	b	b	-	b	b	b	a	a	b	b	b	b	a	b	b	b	b	a	a	b	a	a
AHMR_05K08	a	a	a	a	a	b	a	b	a	-	b	a	a	a	b	a	a	a	b	b	a	b	a	b	a	b	a	a	b	b	a	b	a	a	b	b	b	b	b	a	a	b	b	b	a	a	b	a	a
CAHMR_05K11**	b	b	a	b	a	b	b	a	a	a	b	b	a	b	a	b	a	a	b	b	b	b	a	b	b	a	b	a	b	b	b	b	b	b	b	b	b	b	b	b	b	a	a	b	b	b	a	a	a
AHMR_05K12	a	b	b	b	b	a	a	b	b	a	b	a	a	b	b	a	a	a	a	-	a	b	a	a	b	a	b	b	a	a	b	a	a	b	b	a	a	b	b	a	-	b	-	b	b	b	a	b	a
AHMR_05K18	a	a	a	a	a	b	a	b	b	a	b	a	a	a	b	a	a	a	b	b	a	b	a	b	b	a	a	b	b	b	a	b	a	a	b	b	b	a	b	a	a	b	b	b	a	a	b	a	a
AHMR_05L02	a	a	a	b	-	b	a	b	b	a	b	a	a	a	b	b	b	a	b	b	a	b	a	a	b	a	a	b	b	b	b	b	b	a	a	b	b	b	b	a	b	b	b	b	a	a	b	a	a
AHMR_05L10	b	a	a	a	a	a	a	b	a	b	b	a	b	a	a	a	a	b	b	b	a	b	b	a	a	b	a	a	a	b	b	b	b	b	a	b	b	a	a	a	b	b	a	a	b	a	a	b	b
CAHMR_05M06	a	b	b	b	b	a	b	b	a	b	b	b	b	a	a	a	a	b	a	a	a	b	b	a	b	b	b	a	a	b	a	a	a	a	b	b	a	a	a	b	b	a	b	b	b	b	a	a	b
CAHMR_05M17**	a	b	b	b	b	a	a	b	a	a	b	a	b	b	b	a	b	a	b	b	b	b	a	b	b	b	b	b	a	b	a	a	b	b	a	b	b	a	a	b	a	b	b	b	a	a	b	b	a
AHMR_05N01**	b	a	b	a	a	a	a	b	a	a	b	a	a	a	a	a	a	b	b	a	a	a	a	a	a	b	a	b	b	b	b	b	b	b	b	b	a	a	a	b	b	a	a	-	a	a	b	b	a
CAHMR_05N09	b	b	b	a	a	b	a	a	b	b	b	a	a	b	b	a	a	a	a	b	b	b	b	a	b	a	a	a	b	a	a	a	a	a	a	a	a	b	a	a	b	a	a	b	b	a	-	a	a
AHMR_05N17	a	b	b	b	b	a	b	b	a	a	a	b	b	b	a	a	a	a	a	a	a	b	a	b	a	b	b	a	a	a	b	a	b	b	b	a	b	b	b	b	b	a	b	a	b	b	b	a	b
AHMR_05N19	a	b	a	a	b	b	b	b	b	a	a	b	b	a	b	b	b	a	b	b	a	a	a	a	a	b	a	b	b	b	a	b	a	b	a	a	a	b	a	a	b	a	b	b	b	a	b	a	b
AHMR_05N21*	b	b	a	a	b	a	a	b	b	a	b	b	a	a	b	b	a	b	a	a	b	a	a	a	b	b	b	b	b	b	b	b	a	a	b	a	a	b	a	b	b	a	a	a	b	b	b	b	a
AHMR_05O01	b	b	b	a	a	b	b	a	b	a	a	a	a	b	b	b	b	-	a	b	a	a	b	b	a	b	b	a	b	a	b	a	a	b	a	a	b	b	a	b	b	a	a	b	b	b	a	a	b
CAHMR_05O12**	b	a	a	a	a	a	b	a	b	b	b	a	b	b	b	b	b	b	a	b	a	b	a	b	b	b	a	a	b	b	b	b	a	-	b	a	b	a	b	-	-	b	-	b	-	b	b	b	a
CAHMR_05P09	a	b	a	b	a	b	a	a	a	b	b	a	b	b	b	b	b	b	a	b	b	b	a	b	b	a	a	a	a	a	b	b	b	a	b	b	b	b	a	a	a	b	a	b	b	a	b	b	b
AHMR_05P19	a	b	a	a	b	a	-	b	b	b	a	b	a	a	a	a	b	b	b	b	a	b	a	b	a	b	b	b	a	a	a	a	a	b	a	a	a	a	a	b	b	a	a	a	-	-	b	-	b
CAHMR_06A08	a	-	-	a	b	a	-	-	-	a	b	a	-	a	b	a	b	b	-	a	b	a	b	b	b	-	b	b	a	-	b	-	b	a	b	a	b	a	b	a	a	a	b	a	a	b	b	b	a
CAHMR_06B02**	-	b	a	b	a	b	b	a	a	a	b	b	a	b	a	b	b	a	b	b	b	b	a	b	b	a	b	a	b	b	b	b	b	b	b	b	b	b	b	b	a	a	a	b	b	b	a	a	a
AHMR_06B15	b	-	b	b	b	b	a	b	a	b	a	b	a	a	b	b	a	a	a	a	b	a	b	b	a	b	b	a	a	a	b	a	a	b	b	a	b	a	b	b	a	a	a	b	a	a	-	b	a
AHMR_06C14	b	b	b	a	a	b	b	a	b	a	a	a	a	b	b	b	b	a	a	b	a	a	b	b	a	b	b	a	b	a	b	a	a	b	a	a	b	b	a	b	b	a	a	b	b	b	a	a	b
AHMR_06C24	b	b	a	a	b	b	b	b	b	b	a	a	a	b	b	b	b	b	b	a	a	a	a	b	b	a	a	b	a	a	a	a	a	a	a	b	b	a	b	a	b	b	b	b	a	a	a	b	a
CAHMR_06D05	a	b	-	b	b	a	b	b	a	a	a	a	b	a	a	a	b	b	a	a	b	b	a	b	a	b	a	b	a	a	a	a	a	b	b	a	a	b	b	b	b	a	a	a	b	b	b	b	b
AHMR_06E22	b	b	b	a	a	b	b	a	b	a	a	b	-	b	a	b	b	a	b	a	a	b	b	b	a	b	a	a	b	a	b	b	b	a	b	a	a	a	b	a	a	b	a	b	b	a	a	a	a
AHMR_06F02	b	b	b	b	a	a	a	b	b	b	a	b	b	b	b	a	b	a	b	b	a	a	b	a	a	b	b	b	b	b	b	a	a	b	b	a	a	b	b	a	a	b	b	b	-	b	b	a	a
AHMR_06F12**	a	b	b	b	b	a	a	b	a	a	b	a	b	b	b	a	a	a	b	b	a	b	a	b	b	a	b	b	a	a	b	a	a	b	a	b	a	a	b	-	b	a	a	b	b	a	b	b	a
AHMR_06F15	b	b	-	a	b	b	b	b	b	b	a	b	a	b	b	b	a	b	b	a	a	b	a	a	a	a	a	b	b	b	b	b	a	b	a	-	b	b	-	b	b	a	b	b	a	a	b	b	b
AHMR_06F24	b	b	a	b	b	b	b	a	a	b	b	a	a	a	a	a	a	a	b	b	a	b	a	a	b	a	a	a	b	-	b	a	b	b	a	b	a	a	a	-	a	a	a	a	a	a	b	a	a
CAHMR_06G09	a	a	a	a	a	b	b	a	a	b	b	a	a	a	a	b	a	a	b	b	b	b	b	a	b	a	a	b	a	a	a	b	b	b	a	b	b	b	b	b	a	a	a	b	b	b	a	b	b
CAHMR_06G21	a	b	b	b	b	a	a	b	a	a	b	b	b	b	b	a	b	b	a	b	b	b	b	b	b	b	b	b	a	b	a	a	b	b	a	a	b	a	b	b	a	b	b	b	a	a	b	b	a
CAHMR_06H07	a	b	a	b	b	a	b	b	a	b	a	a	a	a	a	a	a	b	b	b	b	b	a	b	a	b	b	b	b	a	b	a	a	b	a	a	-	a	a	a	b	b	a	a	b	a	b	b	b
AHMR_06H09**	b	a	a	a	a	a	b	a	b	b	b	a	b	b	b	b	b	b	a	b	a	b	a	b	b	b	a	a	b	b	b	b	a	b	b	a	b	a	b	a	a	b	a	b	b	b	b	b	a
AHMR_06H10	a	-	-	b	b	a	-	b	a	a	a	a	-	a	a	a	b	b	a	a	b	b	a	b	a	-	a	b	a	-	a	-	a	b	b	a	a	b	b	-	b	a	a	a	b	b	b	b	b
AHMR_06I06	b	b	a	b	b	b	a	a	a	a	b	a	a	a	a	b	a	a	b	b	b	b	a	a	b	a	a	a	a	b	b	a	b	b	a	b	b	a	a	b	a	a	a	a	a	a	a	a	a
CAHMR_06I09	b	a	a	a	a	a	a	b	a	a	a	a	b	b	a	a	a	b	a	b	b	b	b	a	a	b	a	a	a	b	b	b	b	b	a	b	b	a	a	a	b	b	a	a	b	a	a	b	b
AHMR_06I12	b	b	-	-	a	b	b	a	b	a	a	a	a	b	b	b	b	a	a	-	a	a	b	b	a	b	b	a	b	a	b	a	a	b	a	a	b	b	a	b	b	a	a	b	b	b	a	a	b
AHMR_06I15	a	b	-	a	b	a	a	a	b	a	b	a	b	a	a	a	b	b	b	a	b	a	b	b	b	a	b	b	a	a	b	b	b	a	b	a	b	a	b	a	a	a	b	a	-	-	b	b	a
AHMR_06I21*	b	a	a	a	b	b	a	b	b	b	a	a	b	b	a	b	a	a	b	a	a	a	b	b	a	a	a	b	a	b	b	a	a	a	a	b	b	b	a	a	b	b	b	b	a	a	a	b	a
AHMR_06J03	a	b	a	b	a	b	a	a	a	b	b	a	b	b	b	b	b	b	a	b	b	b	a	b	b	a	a	a	a	a	b	b	b	a	b	b	b	b	a	a	a	b	a	b	b	a	b	b	b
AHMR_06J09	a	-	-	b	a	b	-	a	a	a	a	b	-	a	a	a	a	a	a	b	a	b	-	b	a	-	b	b	b	-	b	-	b	b	b	b	a	a	b	a	b	a	a	a	b	a	-	a	-
AHMR_06K03**	b	a	a	a	b	b	a	b	b	b	a	a	-	-	a	b	a	a	b	a	a	a	-	b	a	a	a	b	a	b	b	a	a	a	a	b	b	b	a	a	b	-	b	b	a	a	a	b	a
AHMR_06K09	a	a	a	b	a	b	a	a	a	a	a	b	a	b	a	a	a	a	a	b	a	b	b	b	a	b	b	b	a	a	b	-	b	b	b	b	a	a	b	a	b	a	a	a	b	a	a	a	b
AHMR_06K12	a	b	b	-	a	b	a	b	b	a	b	b	b	b	b	a	b	b	b	a	b	a	a	a	b	a	b	a	-	a	b	-	b	a	b	a	b	b	a	b	a	a	a	a	b	b	a	b	b
CAHMR_06K18	a	a	a	b	a	b	a	b	b	a	b	a	a	a	b	a	a	a	b	b	a	b	a	b	b	a	a	b	b	b	a	b	a	a	b	b	b	a	b	a	a	b	b	b	a	a	b	a	a
CAHMR_06K21	a	b	a	a	a	a	a	b	b	a	b	a	b	a	a	a	a	b	a	b	a	b	b	a	b	b	b	b	b	a	b	a	a	b	a	a	b	a	b	b	a	b	a	a	b	b	a	b	a
AHMR_06K23	a	-	-	a	a	b	-	b	b	a	b	a	-	a	b	a	a	a	b	b	-	b	a	b	b	a	a	-	-	-	-	b	a	a	b	b	b	a	b	a	a	-	b	b	a	a	b	a	a
AHMR_06L17	a	a	a	b	a	b	a	a	a	a	a	b	b	a	a	a	a	a	a	b	a	b	b	b	a	b	b	b	b	a	b	b	b	b	b	b	a	a	b	a	b	a	a	a	b	a	b	a	b
CAHMR_06L18*	-	a	a	a	b	b	a	b	b	b	a	a	b	b	a	-	a	a	b	a	a	a	b	b	a	a	a	b	a	b	a	a	a	a	a	b	b	a	b	a	b	b	b	b	a	a	a	b	a
AHMR_06M24	b	b	a	a	b	b	b	a	b	b	b	a	a	b	a	b	b	b	b	b	a	b	a	b	a	a	a	a	b	b	a	b	a	a	a	b	b	b	a	b	b	a	a	a	a	a	a	b	b
AHMR_06P03	a	b	a	a	b	b	a	b	a	b	b	a	b	b	a	b	b	a	a	a	a	a	b	b	a	b	a	b	a	b	b	a	a	a	a	b	b	a	a	a	a	b	b	b	a	a	a	a	a
AHMR_06P06	b	b	b	a	b	b	b	b	a	b	-	b	b	a	b	-	b	a	a	b	a	a	a	a	a	-	a	b	b	-	b	-	b	b	b	b	a	b	a	a	b	a	b	b	a	a	b	a	a
AHMR_07A04	a	a	a	b	a	b	a	a	a	a	a	b	b	a	a	a	a	a	a	b	a	b	b	b	a	b	b	b	b	a	b	b	b	b	b	b	a	a	b	a	b	a	a	a	b	a	b	a	b
AHMR_07A07	b	b	a	b	b	b	a	a	a	a	b	a	a	a	a	b	a	a	b	b	b	b	a	a	b	a	a	a	a	b	b	a	b	b	a	b	b	a	a	b	a	a	a	a	a	a	a	a	a
AHMR_07C04	b	b	b	b	a	a	a	b	a	b	a	b	b	b	b	a	b	a	b	b	a	a	b	a	a	b	b	b	b	b	b	a	a	b	b	a	a	b	b	a	a	b	b	b	-	-	b	a	a
CAHMR_07C05	a	b	a	b	b	a	b	b	a	b	a	a	a	a	a	a	a	b	b	b	b	b	a	b	a	b	b	b	b	a	b	a	a	b	a	a	a	a	a	a	b	b	a	a	b	a	b	b	b
AHMR_07C07**	b	-	-	a	b	b	-	b	b	a	b	b	-	a	b	b	b	b	a	a	b	a	a	a	b	-	b	b	b	-	b	-	a	a	b	a	b	b	a	b	b	a	a	a	b	b	a	b	b
AHMR_07C16	b	b	a	b	b	b	a	-	a	a	b	a	b	b	a	b	a	a	b	b	b	b	a	b	b	b	a	a	a	b	b	a	b	b	a	b	b	b	a	b	b	a	a	a	b	a	a	a	a
AHMR_07C17	a	b	a	b	a	a	-	a	a	a	b	a	-	b	b	b	b	b	a	b	b	b	b	a	b	a	a	-	a	a	b	b	a	b	a	b	b	b	a	b	b	a	a	b	-	-	b	b	b
CAHMR_07D15	b	b	a	b	b	a	a	a	b	a	-	a	b	a	b	a	b	-	a	a	b	a	b	b	b	a	b	b	a	a	b	b	b	a	b	a	b	a	b	a	a	-	b	b	a	a	b	b	b
AHMR_07D16	a	b	b	b	b	a	b	b	a	b	b	b	b	a	a	a	a	b	a	a	a	b	b	a	b	b	b	a	a	b	a	a	a	a	b	b	a	a	a	b	b	a	b	b	b	b	a	a	b
CAHMR_07D17	b	a	b	b	b	b	a	b	a	b	a	-	-	a	b	b	-	a	-	-	b	a	b	b	a	b	b	a	a	a	b	a	a	b	b	a	b	a	b	b	a	a	a	b	a	a	b	b	a
AHMR_07D22*	a	a	a	b	a	-	a	a	a	a	a	b	b	a	a	a	a	a	a	b	a	b	b	b	a	b	b	b	b	a	b	-	b	b	b	b	a	a	b	a	b	a	a	a	-	-	b	a	b
CAHMR_07E02	b	b	b	a	a	b	b	a	b	a	a	a	a	b	b	b	b	a	a	b	a	a	b	b	a	b	b	a	b	a	b	a	a	b	a	a	b	b	a	b	b	a	a	b	b	b	a	a	b
CAHMR_07F21	a	a	a	a	a	b	b	a	a	b	b	a	a	a	a	b	a	a	b	b	b	b	b	a	b	a	a	b	a	a	a	b	b	b	a	b	b	b	b	b	a	a	a	b	b	b	a	b	b
CAHMR_07G08	a	b	a	b	a	b	a	a	a	b	b	a	b	b	b	b	b	b	a	b	b	b	a	b	b	a	a	a	a	a	b	b	b	b	b	b	b	b	a	a	a	b	a	b	b	a	b	b	b
AHMR_07G12	b	b	b	a	a	b	b	a	b	a	a	a	a	b	b	b	b	a	a	b	a	a	b	b	a	b	b	a	b	a	b	a	a	b	a	a	b	b	a	b	b	a	a	b	b	b	a	a	b
CAHMR_07G23	b	a	a	b	a	b	-	b	b	a	a	b	-	a	a	a	a	a	a	b	a	a	b	b	a	b	b	b	-	a	b	b	b	b	b	b	a	a	-	a	b	a	a	a	b	a	b	a	b
CAHMR_07H13	b	b	b	b	b	a	a	b	b	b	a	b	b	b	b	a	b	a	b	b	b	a	b	a	a	b	b	b	b	b	b	a	a	b	b	a	a	b	b	a	a	b	b	b	a	b	b	a	b
CAHMR_07H22	a	b	a	b	a	b	a	a	a	b	b	a	b	b	b	b	b	b	a	b	b	b	a	b	b	a	a	a	a	a	b	b	b	a	b	b	b	b	a	a	a	b	a	b	b	a	b	b	b
CAHMR_07I02	a	b	a	a	b	b	b	a	b	b	a	b	a	a	a	b	b	b	b	b	a	b	b	b	b	a	b	b	a	a	a	a	a	a	a	a	b	a	b	b	b	a	a	a	b	b	b	b	b
CAHMR_07I22	a	b	a	b	a	b	a	-	a	b	b	a	b	b	b	b	b	b	a	b	b	b	a	b	b	a	a	a	a	a	b	b	b	a	b	b	b	b	a	a	a	b	a	b	b	a	b	b	b
CAHMR_07J01	a	b	a	b	b	a	b	b	a	b	a	a	a	a	a	a	a	b	b	b	b	b	a	b	a	b	b	b	b	a	b	a	a	b	a	a	a	a	a	a	b	b	b	a	a	a	a	b	b
AHMR_07J13	a	b	b	a	b	b	b	b	b	b	b	b	a	b	b	a	a	a	a	b	a	a	a	a	a	b	a	b	a	b	a	b	a	b	b	b	b	b	b	a	b	b	b	b	a	a	b	a	b
AHMR_07J21	a	a	a	b	a	b	a	b	a	a	b	a	b	b	b	b	b	b	a	b	b	b	b	a	b	a	a	b	a	b	b	b	b	b	a	b	b	b	b	a	b	b	b	b	a	a	b	a	a
CAHMR_07K01	b	b	a	a	b	b	b	a	b	b	a	b	a	b	b	b	a	b	b	a	a	b	a	b	a	a	a	b	b	b	b	a	a	b	a	b	b	b	a	b	b	a	b	a	a	a	b	b	b
AHMR_07L11	a	a	b	b	a	b	a	b	b	a	b	a	a	b	a	a	a	b	a	b	b	b	a	a	b	a	b	a	b	a	b	b	a	b	b	a	a	a	a	b	b	a	a	a	b	a	a	b	a
CAHMR_07L16	a	a	b	-	a	b	a	b	b	a	b	a	a	b	a	a	a	b	a	b	b	b	a	a	b	a	b	a	b	a	b	b	a	b	b	a	a	a	a	b	b	a	a	a	b	a	a	b	a
AHMR_07L21	a	b	a	a	b	b	b	b	b	a	b	b	b	a	b	b	b	a	b	b	a	a	a	a	a	b	a	b	b	b	a	b	a	b	a	a	a	b	a	a	b	a	b	b	b	a	b	a	b
AHMR_07M03	b	b	a	b	b	b	a	a	a	b	b	b	a	a	a	a	a	a	a	b	b	b	a	b	a	b	b	b	b	a	a	b	a	b	b	a	a	a	a	b	a	a	b	a	a	b	b	a	b
CAHMR_07N06	a	a	a	a	b	b	a	a	b	b	a	a	a	a	b	a	b	a	b	b	a	b	b	b	b	b	b	a	a	a	b	a	b	a	a	b	a	a	b	b	a	b	a	b	b	a	b	a	b
CAHMR_07P11	a	a	a	a	a	b	b	a	a	b	b	a	a	a	a	b	a	a	b	b	b	b	b	a	b	a	a	b	a	a	a	b	b	b	a	-	b	b	b	b	a	a	a	b	b	b	a	b	b
CAHMR_07P17	a	b	b	b	b	a	a	b	a	a	b	b	b	b	b	a	b	b	a	b	b	b	b	b	b	b	b	b	a	b	a	a	b	b	a	a	b	a	b	b	a	b	b	b	a	a	b	b	a
CAHMR_08A01*	b	b	a	a	a	b	a	b	b	a	b	b	a	b	b	b	b	b	a	a	b	a	b	a	b	b	b	a	b	b	b	b	a	a	b	a	b	b	a	b	a	a	a	a	b	b	a	b	b
AHMR_08A04	a	b	b	a	a	b	a	b	b	a	b	b	a	b	b	a	b	b	b	a	b	a	b	a	b	b	b	a	b	a	b	b	a	a	b	a	b	b	a	b	a	a	a	a	-	b	a	-	-
AHMR_08A13**	b	b	a	b	a	b	b	b	a	a	b	b	a	b	a	b	b	a	b	b	b	b	a	b	b	a	b	a	b	b	b	b	a	-	b	b	b	b	b	b	a	a	a	-	b	b	a	a	a
AHMR_08A17	b	b	b	a	b	a	-	a	b	a	-	a	b	a	-	a	b	b	b	a	b	a	-	b	b	a	-	-	a	a	b	b	b	a	b	a	b	a	b	a	a	b	b	a	a	b	b	b	a
AHMR_08B03	a	b	b	a	a	a	b	a	b	b	b	b	b	b	b	b	a	a	a	b	a	b	b	b	a	a	b	a	a	b	b	b	b	a	a	a	a	a	b	a	a	b	a	b	b	a	a	a	a
CAHMR_08B05**	b	b	a	a	b	b	a	b	b	a	b	b	a	a	b	b	b	b	a	a	b	a	a	a	b	b	b	b	b	b	b	-	a	a	b	a	b	b	a	b	b	a	a	a	-	b	a	b	b
AHMR_08B06	b	b	b	a	b	a	a	a	b	a	b	a	b	a	b	a	b	b	b	a	b	a	b	b	b	a	b	b	a	a	b	-	b	a	b	-	b	a	b	a	a	b	b	a	a	b	b	b	a
AHMR_08B07*	b	a	a	-	a	b	a	a	a	a	a	b	b	a	a	a	a	a	a	b	a	b	b	b	a	b	-	b	b	a	b	b	b	b	b	b	a	a	b	a	b	a	a	a	-	a	b	a	b
AHMR_08B12	a	b	b	-	b	a	a	a	b	a	b	a	b	a	a	a	-	b	b	a	b	a	b	b	b	a	b	b	a	a	b	b	-	a	b	a	b	a	b	a	a	a	-	a	-	b	b	b	a
CAHMR_08B17	a	b	a	b	a	b	a	a	a	b	b	a	b	b	b	b	b	b	a	b	b	b	a	b	b	a	a	a	a	a	b	b	b	a	b	b	b	b	a	a	a	b	a	b	b	a	b	b	b
CAHMR_08B22	a	b	b	b	a	a	a	b	b	a	a	a	a	b	b	a	a	a	a	b	a	a	a	-	b	a	b	b	a	a	b	a	a	b	b	a	a	b	b	a	b	b	a	b	b	b	a	b	a
AHMR_08B23	a	a	a	b	b	a	a	b	a	b	a	a	a	a	a	a	a	b	a	b	b	b	b	b	a	a	b	b	a	a	b	a	a	b	a	a	b	a	b	b	b	b	b	a	a	a	a	b	b
CAHMR_08C07	b	b	b	a	a	b	a	a	b	b	b	a	a	b	b	a	a	a	a	b	b	b	a	a	b	a	a	a	b	a	a	a	a	a	a	a	a	b	a	a	b	a	a	b	b	a	b	a	a
AHMR_08C08	b	b	b	a	a	b	b	a	b	a	a	a	a	b	b	b	b	a	a	b	a	a	b	b	a	b	b	a	b	a	b	a	a	b	a	a	b	b	a	b	b	a	a	b	b	b	a	a	b
AHMR_08C12	a	-	-	b	a	a	-	b	a	a	b	a	b	b	b	b	b	b	a	b	b	-	b	a	b	-	a	b	-	a	b	b	-	b	a	b	b	b	b	b	b	a	b	b	a	a	b	a	a
AHMR_08C17	b	a	a	a	b	b	a	b	b	b	a	a	b	b	a	b	a	a	b	a	a	a	b	b	a	a	a	b	a	b	b	a	a	a	a	b	b	b	a	a	b	b	b	b	a	a	a	b	a
AHMR_08D19	a	a	a	a	a	b	a	b	b	a	b	a	a	a	b	a	a	a	b	b	a	b	a	b	b	a	a	b	-	b	a	b	a	a	b	b	-	a	b	a	a	b	b	b	a	a	b	a	a
CAHMR_08D20	a	a	b	b	a	b	a	b	b	a	b	a	a	b	a	a	a	b	a	b	b	b	a	a	b	a	b	a	b	a	b	b	a	b	b	a	-	a	a	b	b	a	a	a	b	a	a	b	a
AHMR_08E06	b	b	a	b	b	b	a	a	a	a	b	a	b	b	a	b	a	a	b	b	b	b	a	b	b	b	a	a	a	b	b	a	b	b	a	b	b	b	a	b	b	a	a	a	a	a	a	a	a
AHMR_08E11	a	a	a	a	a	b	a	b	b	a	b	a	a	a	b	a	a	a	b	b	a	b	a	b	b	a	a	b	b	b	a	b	a	a	b	b	b	a	b	a	a	b	b	b	a	a	b	a	a
CAHMR_08E12**	b	a	b	a	-	a	a	b	a	a	b	a	a	-	a	a	a	b	b	b	a	b	b	a	a	b	a	a	a	b	b	b	b	b	a	b	-	a	a	b	b	a	a	a	b	a	a	b	b
CAHMR_08F16	a	b	b	a	b	a	a	a	b	b	b	b	a	a	a	b	b	b	a	b	b	a	b	b	a	a	b	b	a	a	b	a	b	a	a	a	a	a	b	a	a	a	a	a	a	b	b	b	a
AHMR_08G10	a	a	a	b	a	a	b	a	a	-	a	a	b	a	a	a	a	a	a	b	a	a	a	a	a	b	a	a	a	b	a	a	b	a	b	b	b	b	b	a	b	b	b	b	a	-	b	a	b
CAHMR_08G14	a	a	a	b	a	b	b	a	b	b	b	b	a	b	-	a	a	a	b	b	a	b	b	-	a	b	b	b	a	a	b	b	b	b	b	b	a	a	b	a	-	b	a	a	b	a	a	a	a
AHMR_08H04	a	a	a	b	a	-	a	a	a	a	a	b	a	b	a	a	a	a	a	b	a	b	b	b	a	b	b	b	a	a	b	b	b	b	b	b	a	a	b	a	b	a	a	a	b	a	a	a	b
CAHMR_08H09	b	a	a	b	a	b	b	b	b	a	a	b	b	a	a	a	a	a	a	b	a	a	b	b	a	b	b	b	b	a	b	b	b	b	b	b	a	a	b	a	b	a	a	a	b	a	b	a	b
AHMR_08H11	a	b	b	a	a	a	b	a	b	a	b	b	b	b	b	b	a	a	a	b	a	b	b	b	a	a	b	a	a	b	b	b	b	a	a	a	a	a	b	a	a	b	a	b	b	a	a	a	a
AHMR_08H13	a	b	b	b	b	a	a	b	a	a	a	b	b	b	a	a	a	-	a	a	b	b	b	b	a	b	a	b	a	a	a	a	a	b	b	a	a	b	b	b	b	a	b	a	b	b	b	a	b
AHMR_08H14	a	a	a	a	a	b	a	b	a	a	b	a	a	a	b	a	a	a	a	b	a	b	a	b	a	b	a	a	b	b	a	b	a	a	b	b	b	b	b	a	a	b	b	b	a	a	b	a	a
CAHMR_08I06	a	a	a	b	a	b	a	a	a	a	a	b	b	a	a	a	a	a	a	b	a	b	b	b	a	b	b	b	b	a	b	b	b	b	b	b	a	a	b	a	b	a	a	a	b	a	b	a	b
CAHMR_08I14	a	a	a	b	a	b	a	a	a	a	a	b	b	a	a	a	a	a	a	b	a	b	b	b	a	b	b	b	b	a	b	b	b	b	b	b	a	a	b	a	b	a	a	a	b	a	b	a	b
AHMR_08J04	a	b	a	b	b	a	b	b	a	b	a	a	a	a	a	a	b	b	b	b	a	b	a	b	a	b	b	b	a	a	-	a	a	b	a	a	a	a	a	a	b	b	a	a	b	b	b	b	b
AHMR_08J17	b	b	b	a	a	b	b	a	b	a	a	a	a	b	b	b	b	a	a	b	a	a	b	b	a	b	b	a	b	a	b	a	a	b	a	a	b	b	a	b	b	a	a	b	b	b	a	a	b
AHMR_08K07*******	a	a	a	a	a	b	a	a	a	a	b	b	a	a	a	b	a	a	a	a	a	a	a	a	a	a	a	a	a	a	b	a	a	a	a	b	a	a	a	a	a	a	a	a	b	a	a	a	a
AHMR_08L03	b	b	b	-	a	b	b	b	b	b	a	b	a	b	b	a	a	b	b	a	a	a	a	a	a	b	a	b	a	b	b	b	a	b	a	b	b	b	b	b	b	a	b	b	a	a	b	b	b
AHMR_08L10	a	a	a	a	a	b	a	b	a	a	b	a	a	a	b	a	a	a	a	b	a	b	a	b	a	b	a	a	b	b	a	b	a	a	b	b	b	b	b	a	a	b	-	b	a	a	b	a	a
CAHMR_08L11	b	b	b	b	a	b	a	a	b	b	b	a	a	b	b	a	a	a	a	b	b	b	a	b	b	a	a	a	b	a	a	a	a	a	a	a	a	b	a	a	b	a	a	b	b	a	b	a	a
CAHMR_08L13	b	a	a	b	a	b	b	a	a	a	a	b	b	a	a	a	a	a	a	b	a	a	b	b	a	b	b	b	b	a	b	b	b	b	b	b	a	a	b	a	b	a	a	a	b	a	b	a	b
AHMR_08M10	a	a	a	b	a	a	-	a	a	b	a	a	b	a	a	a	a	a	a	b	a	a	a	a	a	b	a	a	a	b	a	a	b	a	b	b	b	b	b	a	b	b	b	b	a	b	b	a	b
AHMR_08M14	b	a	a	-	a	b	b	b	b	a	a	-	b	a	a	a	a	a	a	b	a	a	b	b	a	b	b	b	b	a	b	b	b	b	b	b	a	a	b	a	b	a	a	-	-	a	b	a	b
AHMR_08M21*	b	a	b	a	a	a	a	b	a	a	b	a	a	b	a	a	a	b	b	b	a	b	b	a	a	b	a	a	a	b	b	b	b	b	a	b	b	a	a	b	b	a	a	a	b	a	a	b	b
CAHMR_08M22	a	a	a	b	a	b	a	a	a	a	a	b	b	a	a	a	a	a	a	b	a	b	b	b	a	b	b	b	b	a	b	b	b	b	b	b	a	a	b	a	b	a	a	a	b	a	b	a	b
AHMR_08M24	a	b	a	b	b	a	b	b	a	a	a	a	b	a	a	a	b	b	a	a	b	b	a	b	a	b	a	b	a	a	a	a	a	b	b	a	a	b	b	b	b	a	a	a	b	b	b	b	b
CAHMR_08N04	a	a	a	a	a	b	a	b	b	a	b	a	a	a	b	a	a	a	b	b	a	b	a	b	b	a	a	b	b	b	a	b	a	a	b	b	b	a	b	a	a	b	b	b	a	a	b	a	a
AHMR_08N05	b	-	b	a	a	b	b	a	b	a	b	b	b	b	a	b	b	a	b	a	a	b	b	a	a	b	-	a	b	a	b	b	b	a	b	a	a	a	b	a	a	-	a	b	-	-	a	a	-
AHMR_08N08	b	b	a	a	b	b	b	a	b	b	a	b	a	b	a	b	a	b	b	a	a	b	-	b	a	a	a	a	b	b	a	a	a	b	a	b	b	b	a	b	b	a	b	a	a	a	b	b	a
AHMR_08N24	a	b	a	b	a	b	a	a	a	b	b	a	b	b	b	b	b	b	a	b	b	b	a	b	b	a	a	a	a	a	b	b	b	b	b	b	b	b	a	a	a	b	a	b	-	a	b	b	b
CAHMR_08O04**	b	a	b	a	a	a	a	b	a	a	b	a	a	a	a	a	a	b	b	a	a	a	a	a	a	b	a	b	b	b	b	a	b	b	b	b	a	a	-	b	b	a	a	-	a	a	b	b	a
CAHMR_08O05	a	a	a	b	a	b	a	a	a	a	a	b	b	a	a	a	a	a	a	b	a	b	b	b	a	b	b	b	b	a	b	b	b	b	b	b	a	a	b	a	b	a	a	a	b	a	b	a	b
AHMR_08O09	a	a	a	b	a	a	a	a	a	b	a	-	b	a	b	a	a	a	a	b	a	a	a	a	a	b	a	a	a	b	b	a	b	a	b	b	a	b	b	a	b	b	b	b	b	b	b	a	b
AHMR_08O10	a	b	b	a	b	b	b	b	b	b	b	b	a	b	b	a	a	a	a	b	a	a	a	a	a	b	a	b	a	b	a	b	a	b	b	b	b	b	b	a	b	b	b	b	a	a	b	a	b
CAHMR_08O12	b	b	a	a	b	a	b	b	b	b	a	a	a	b	b	a	b	b	b	a	a	a	a	b	b	a	a	b	b	a	a	a	a	a	b	b	b	a	b	a	b	-	a	a	b	a	b	b	a
CAHMR_08O16	b	b	a	b	b	b	a	a	a	a	b	a	a	b	a	b	a	a	b	b	b	b	a	a	b	b	a	a	a	b	b	a	b	b	a	b	b	b	a	b	a	a	a	a	a	a	a	a	a
CAHMR_08O18*******	a	a	a	a	a	b	a	a	a	a	b	b	a	a	a	b	a	a	a	a	a	a	a	a	a	a	a	a	a	a	b	a	a	a	a	b	a	a	a	a	a	a	a	a	b	a	a	a	a
AHMR_08P05	b	b	b	a	a	-	-	a	b	a	a	b	b	b	b	b	b	a	b	b	a	b	b	b	a	b	a	a	-	a	b	b	b	a	b	a	a	a	b	a	a	b	a	b	b	a	a	a	a
AHMR_08P08	a	b	a	-	b	a	a	b	a	a	a	a	-	b	a	a	b	b	a	a	b	b	b	b	a	b	a	b	a	a	a	a	a	b	b	a	a	b	b	b	b	a	a	a	b	-	b	b	b
AHMR_08P24	a	b	b	a	a	a	b	a	b	a	-	b	b	b	b	b	a	a	a	b	a	b	b	b	a	a	b	a	a	b	b	b	b	a	a	a	a	a	b	a	a	b	a	b	b	a	a	a	a
BBMR_09A04	a	b	b	a	a	b	a	b	b	a	b	b	a	b	b	a	b	b	b	a	b	a	b	a	b	b	b	a	-	a	b	b	a	a	b	a	b	b	a	b	a	a	a	a	b	b	a	b	b
BBMR_09A14	b	b	b	a	a	b	b	a	b	a	b	b	a	a	a	b	a	b	a	a	a	a	a	b	a	b	b	a	b	b	b	b	b	b	a	a	a	a	a	b	b	a	b	b	a	b	a	a	a
BBMR_09B07	b	b	a	b	a	a	b	a	a	a	a	a	a	b	a	a	a	a	b	b	b	b	a	b	b	a	b	a	b	b	a	b	b	b	b	a	b	b	b	b	b	a	a	b	a	b	a	a	a
CBBMR_09B23	a	b	a	b	b	a	b	b	a	a	a	a	b	a	a	a	b	b	a	a	b	b	a	b	a	b	a	b	a	a	a	a	a	b	b	a	a	b	b	b	b	a	a	a	b	b	b	b	b
CBBMR_09C04	b	b	b	b	b	b	a	a	a	b	b	b	a	a	a	a	a	a	a	b	b	b	a	b	a	a	b	b	b	a	a	b	a	b	b	a	a	a	a	b	a	a	b	a	a	b	b	a	b
BBMR_09C09	a	b	a	a	a	b	a	b	b	a	b	b	-	b	b	a	b	b	b	a	b	a	b	a	b	b	b	a	b	b	b	b	a	a	b	a	b	b	a	b	a	a	a	a	b	b	a	b	b
CBBMR_09C10	b	b	b	a	a	b	b	a	b	a	a	b	b	b	b	b	b	a	b	b	a	b	b	b	a	a	-	a	b	a	b	b	b	a	a	a	a	a	b	a	a	b	a	b	b	a	a	a	a
BBMR_09D01	a	a	a	b	a	b	a	b	a	a	b	a	b	b	b	b	b	b	a	b	b	b	b	a	b	a	a	b	a	b	b	b	b	b	a	b	b	b	b	a	b	b	b	b	a	a	b	a	a
BBMR_09D02	a	b	b	b	a	a	a	b	b	b	a	a	a	b	b	a	a	a	a	b	a	a	a	a	b	a	b	b	a	a	a	a	b	a	b	a	a	b	b	a	b	b	a	b	b	b	a	b	a
BBMR_09E22	a	b	a	a	b	b	b	b	a	a	b	b	a	b	b	b	a	a	b	b	a	a	a	a	a	b	a	b	b	b	a	b	a	b	b	a	b	b	b	a	b	a	b	b	a	a	b	a	b
BBMR_09E23	a	a	a	b	a	b	a	a	a	a	a	b	b	a	a	a	a	a	a	b	a	b	b	b	a	b	b	b	b	a	b	b	b	b	b	b	a	a	b	a	b	a	a	a	b	a	b	a	b
BBMR_09F02	a	a	a	b	a	b	a	a	a	a	a	b	b	a	a	a	a	a	a	b	a	b	b	b	a	b	b	b	b	a	b	b	b	b	b	b	a	a	b	a	b	a	a	a	b	a	b	a	b
BBMR_09F08	a	b	b	b	b	a	a	b	a	a	b	a	b	b	b	a	a	a	b	b	a	b	a	b	b	b	b	b	-	b	a	a	b	b	a	b	a	a	a	b	a	b	b	b	a	a	b	b	a
BBMR_09G09	b	a	a	a	b	b	a	b	b	b	a	a	b	b	a	b	a	a	b	a	a	a	b	b	a	a	a	b	a	b	a	a	a	a	a	b	b	a	b	a	b	b	b	b	a	a	a	b	a
BBMR_09G19	a	b	a	a	b	b	a	b	a	b	b	a	b	b	b	b	b	a	b	a	a	a	b	b	a	b	a	b	a	a	b	a	a	a	a	b	b	a	a	a	a	b	b	b	a	a	a	a	a
BBMR_09H11*	a	b	b	b	b	a	a	b	a	a	b	a	b	b	b	a	b	a	b	b	a	b	a	b	b	b	b	b	a	b	a	a	b	b	a	b	b	a	a	b	a	b	b	b	a	a	b	b	a
BBMR_09H13	a	b	a	a	b	b	b	b	b	a	b	b	b	a	b	b	b	a	b	b	a	a	a	a	a	b	a	b	b	b	a	b	a	b	a	a	a	b	a	a	b	a	b	b	b	a	b	a	b
CBBMR_09I17	a	b	b	a	b	a	a	a	b	a	b	b	b	a	a	a	b	b	a	a	b	a	b	b	b	a	b	b	a	a	b	a	b	a	b	a	b	a	b	a	-	a	b	a	a	b	b	b	a
CBBMR_09J03	a	b	b	b	a	a	a	b	b	b	a	a	a	b	b	a	a	a	a	b	a	a	a	a	b	a	b	b	a	a	a	a	b	a	b	a	a	b	b	a	b	b	a	b	b	b	a	b	a
BBMR_09J08	a	b	b	a	a	b	a	b	b	a	b	b	b	b	b	a	b	b	b	a	b	b	a	a	b	a	b	a	b	a	b	b	b	b	b	a	a	b	a	b	a	a	a	a	b	b	a	b	b
CBBMR_09J20	a	a	a	b	a	b	a	b	a	a	b	a	b	b	b	b	b	b	a	b	b	b	b	a	b	a	a	b	a	b	b	b	b	b	a	b	b	b	a	b	b	a	b	b	a	a	b	a	a
BBMR_09K03	a	b	b	a	a	a	b	a	b	b	b	b	b	b	b	b	a	a	a	b	a	b	b	b	a	a	b	a	a	b	b	b	b	a	a	a	a	a	b	a	a	b	a	b	b	a	a	b	a
BBMR_09K16	a	a	a	a	a	b	a	b	b	a	b	a	a	a	b	a	a	a	b	b	a	b	a	b	b	a	a	b	b	b	a	b	a	a	b	b	b	a	b	a	a	b	b	b	a	a	b	a	a
BBMR_09K18	a	b	a	a	b	b	b	b	b	a	b	b	a	a	b	b	b	a	b	b	a	a	a	a	a	b	a	b	b	b	a	b	a	b	a	a	a	b	a	a	b	a	b	b	b	a	b	a	b
BBMR_09K23	a	b	b	b	b	a	b	b	a	b	b	b	b	a	a	a	a	b	a	a	a	b	b	a	b	b	b	a	a	b	a	a	a	a	b	b	a	a	a	b	b	a	b	b	b	b	a	a	b
CBBMR_09L05	a	b	b	b	a	a	a	b	b	b	a	a	a	b	a	-	a	a	a	b	a	a	a	a	b	a	b	b	b	a	a	a	b	-	b	a	a	b	b	a	b	b	a	b	b	b	a	b	a
CBBMR_09M11****	b	b	a	a	b	b	a	b	b	a	b	b	a	a	b	b	b	b	a	a	b	a	a	a	b	b	b	b	b	b	b	b	a	-	b	a	b	b	a	b	b	a	a	a	b	b	a	b	b
CBBMR_09M23	b	b	a	b	b	a	a	a	b	a	b	a	b	a	b	a	b	b	b	a	b	a	b	b	b	a	b	b	a	a	b	b	b	a	b	a	b	a	b	a	a	b	b	a	a	a	b	b	b
BBMR_09O18	a	a	b	b	b	a	b	a	b	b	a	a	a	b	b	a	a	b	b	a	b	b	a	b	b	a	b	b	b	b	a	b	a	a	a	b	b	b	b	a	a	b	b	b	a	b	b	a	a
BBMR_09O19	a	b	a	b	b	a	b	b	a	b	a	a	b	a	a	a	a	b	b	b	b	b	a	b	a	b	b	b	b	a	b	a	a	b	a	a	a	a	a	a	b	b	b	a	a	a	a	b	b
BBMR_09O20*	a	b	a	a	a	b	a	b	b	a	b	b	a	b	b	a	b	b	b	a	b	a	b	a	b	b	b	a	b	b	b	b	a	a	b	a	b	b	a	b	a	a	a	a	b	b	a	b	b
CBBMR_09P05	a	b	a	b	b	a	b	b	a	b	a	a	a	a	a	a	a	b	b	b	b	b	a	b	a	b	b	b	b	a	b	a	a	b	a	a	a	a	a	a	b	b	a	a	b	a	b	b	b
BBMR_09P11	b	b	b	b	a	a	a	b	b	b	a	b	b	b	b	a	b	a	b	b	a	a	b	a	a	b	b	b	b	b	b	a	a	b	a	a	a	b	b	a	a	b	b	b	a	b	b	a	a
BBMR_10A11	a	b	a	a	b	b	b	b	b	a	b	b	b	a	b	b	b	a	b	b	a	a	a	a	a	b	a	b	b	b	a	b	a	b	a	a	a	b	a	a	b	a	b	b	-	a	b	-	b
BBMR_10A13	b	a	a	-	b	b	a	b	b	b	a	a	b	b	a	b	a	a	b	a	a	a	b	b	a	a	a	b	a	b	b	a	a	a	a	b	b	b	a	a	b	b	b	b	a	a	a	b	a
BBMR_10A17**	a	a	a	a	a	b	a	b	a	a	b	a	a	a	b	a	a	a	a	b	a	b	a	b	a	b	a	a	b	a	a	b	a	a	b	b	b	a	a	a	a	b	b	b	a	a	b	a	a
CBBMR_10A19	b	b	b	a	a	a	a	b	a	b	a	b	b	b	b	a	b	b	b	b	a	a	b	a	b	a	a	b	b	b	b	a	a	b	a	a	a	b	b	b	a	b	b	b	a	b	b	a	a
BBMR_10B08	a	b	b	b	b	a	a	b	a	a	b	b	b	b	b	a	b	b	a	b	b	b	b	b	b	b	b	b	a	b	a	a	b	b	a	a	b	a	b	b	a	b	b	a	a	a	b	b	a
CBBMR_10B09	b	a	a	a	b	b	a	b	a	b	a	a	b	b	a	b	a	a	b	a	a	a	b	b	a	a	a	b	a	b	b	a	a	a	a	b	b	b	a	a	b	b	b	b	a	a	a	b	a
CBBMR_10B19	a	a	a	b	a	b	a	b	a	a	b	a	b	b	b	b	b	b	a	b	b	b	b	a	b	a	a	b	a	b	b	b	b	b	a	b	b	b	b	a	b	b	b	b	a	a	b	a	a
CBBMR_10B23**	b	a	a	b	a	a	a	a	b	a	b	a	b	a	a	a	b	b	a	a	a	b	a	a	b	a	a	a	a	a	a	a	a	b	a	a	b	a	a	a	a	b	b	a	a	a	a	a	a
CBBMR_10C10	b	b	b	a	a	b	b	a	b	a	a	b	b	b	b	b	b	a	b	b	a	b	b	b	a	b	a	a	b	a	b	b	b	a	b	a	a	a	b	a	a	b	a	b	b	a	a	a	a
BBMR_10C11	b	a	a	a	b	b	a	b	b	b	a	a	b	b	a	b	a	a	b	a	a	a	b	b	a	a	a	b	a	b	b	a	a	-	a	b	b	b	a	a	b	b	b	b	-	a	a	b	a
BBMR_10C17	a	b	b	b	a	a	a	b	b	b	a	a	a	b	b	a	a	a	a	b	a	a	a	a	b	a	b	b	a	a	a	a	b	a	b	a	a	b	b	a	b	b	a	b	b	b	a	b	a
CBBMR_10C19	a	a	a	b	a	b	a	b	a	a	b	a	b	b	b	b	b	b	a	b	b	b	b	a	b	a	a	b	a	b	b	b	b	b	a	b	b	b	b	a	b	b	b	b	a	a	b	a	a
BBMR_10C22	b	b	a	a	b	b	b	b	b	b	a	a	a	b	b	b	b	b	b	a	a	a	a	b	b	a	a	b	a	a	a	a	a	a	a	b	b	a	b	a	b	b	b	b	a	a	a	b	a
BBMR_10C24	b	b	b	a	a	b	b	a	b	a	b	b	a	a	a	b	a	b	a	a	a	a	a	a	a	b	b	a	b	a	b	b	b	b	a	a	a	a	a	b	a	a	b	b	a	a	a	a	b
BBMR_10F05	a	b	a	b	b	a	b	a	b	b	b	b	a	a	a	b	a	a	b	b	a	b	a	b	a	a	b	a	a	a	b	b	b	-	a	a	a	a	b	a	a	b	a	a	b	a	a	b	a
CBBMR_10F14	a	a	a	a	a	b	a	b	a	a	b	a	a	a	b	a	a	a	a	b	a	b	a	b	a	b	a	a	b	b	a	b	a	a	b	b	b	b	b	a	a	b	b	b	a	a	b	a	a
CBBMR_10G11	a	b	a	a	a	b	a	b	b	a	b	b	a	b	b	a	b	b	b	a	b	a	b	a	b	b	b	a	b	b	b	b	a	a	b	a	b	b	a	b	a	a	a	a	b	b	a	b	b
BBMR_10G14*	a	b	a	a	a	b	a	b	b	a	b	b	-	b	b	a	b	b	b	a	b	a	b	a	b	b	b	a	b	b	b	b	a	-	b	a	b	b	a	b	a	a	a	a	b	b	a	b	b
BBMR_10H20	a	b	b	a	a	b	b	b	b	b	b	b	a	b	b	a	a	a	a	b	a	a	a	a	a	b	a	b	a	b	a	b	a	b	a	b	b	b	b	a	b	b	b	b	a	a	b	a	b
BBMR_10H21	a	b	b	b	a	a	a	b	b	b	a	a	a	b	b	a	a	a	a	b	a	a	a	a	b	a	b	b	a	a	a	a	b	a	b	a	a	b	b	a	b	b	a	b	b	b	a	b	a
BBMR_10H22	a	b	b	a	b	a	a	a	b	a	b	b	-	a	a	a	b	b	a	b	b	a	b	b	b	a	b	b	a	a	b	a	b	a	a	a	b	a	b	a	a	a	a	a	a	b	b	b	a
BBMR_10I02	a	a	a	a	a	b	a	b	b	a	b	a	a	a	b	a	a	a	b	b	a	b	a	b	b	a	a	b	-	b	a	b	a	a	b	b	b	a	b	a	a	b	b	b	a	a	b	a	a
BBMR_10I05	a	b	b	b	b	a	b	b	a	a	a	a	b	a	a	a	b	b	a	a	b	b	a	b	a	a	a	b	a	a	a	a	a	b	b	a	a	b	b	b	b	a	a	a	b	b	b	b	b
BBMR_10I21	a	b	a	a	b	b	b	b	b	a	a	b	b	a	b	b	b	a	a	b	a	a	a	a	a	b	a	b	b	b	a	b	a	b	a	a	a	b	a	a	b	a	b	b	b	a	b	a	b
BBMR_10J03	a	a	a	b	a	b	a	a	a	a	a	b	b	a	a	a	a	a	a	b	a	b	b	b	a	b	b	b	b	a	b	b	b	b	b	b	a	a	b	a	b	a	a	a	b	a	b	a	b
CBBMR_10J15	a	b	a	a	b	b	b	b	b	a	b	b	b	a	b	b	b	a	b	b	a	a	a	a	a	b	a	b	b	b	a	b	a	b	a	a	a	b	a	a	b	a	b	b	b	a	b	a	b
CBBMR_10K04	a	b	a	b	a	b	a	b	b	b	b	a	a	b	a	a	b	b	b	a	a	b	a	b	b	a	a	a	b	a	b	a	-	a	b	a	b	a	a	b	b	a	a	a	b	a	b	a	a
BBMR_10K05*	a	b	a	a	a	b	a	b	b	a	b	b	a	b	b	a	b	b	b	a	b	a	b	a	b	b	b	a	b	b	b	b	a	-	b	a	b	b	a	b	a	a	a	a	b	b	a	b	b
CBBMR_10K06	b	a	a	a	b	b	a	b	a	b	a	a	b	b	a	b	a	a	b	a	a	a	b	b	a	a	a	b	a	b	b	a	a	a	a	b	b	b	a	a	b	b	b	b	-	a	a	b	a
BBMR_10K12	b	a	a	a	b	b	a	b	b	b	a	a	b	b	a	b	a	a	b	a	a	a	b	b	a	a	a	b	a	b	a	a	a	a	a	b	b	a	b	a	b	b	b	b	a	a	b	b	a
BBMR_10K13	a	a	a	b	a	b	a	b	a	a	b	a	b	b	b	b	b	b	a	b	b	b	b	a	b	a	a	b	a	b	b	b	b	b	a	b	b	b	b	a	b	b	b	b	a	a	b	a	a
BBMR_10K22	a	b	b	a	a	b	b	b	b	b	b	b	a	b	b	a	a	a	b	b	a	a	a	a	a	b	a	b	a	b	a	b	a	b	a	b	b	b	b	a	b	b	b	b	a	a	b	a	b
CBBMR_10K24	a	a	a	a	a	b	a	b	a	a	b	a	a	a	b	a	a	a	a	b	a	b	a	b	a	b	a	a	b	b	a	b	a	a	b	b	b	b	b	a	a	b	-	b	a	a	b	a	a
BBMR_10L06	a	b	a	b	a	b	a	a	a	b	b	a	b	b	b	b	b	b	a	b	b	b	a	b	b	a	a	a	a	a	b	b	b	b	b	b	b	b	a	a	a	b	a	b	b	a	b	b	b
BBMR_10L09	a	a	b	b	b	a	b	a	b	b	a	a	a	b	b	a	a	b	b	a	b	b	a	b	b	a	b	b	b	b	a	b	a	a	a	b	b	b	b	a	a	b	b	b	a	b	b	a	a
BBMR_10L20****	a	b	b	b	b	a	a	b	a	a	b	a	b	b	b	a	a	a	b	b	a	b	a	b	b	a	b	b	a	a	b	a	a	b	a	b	a	b	b	b	b	a	a	b	b	a	b	b	a
CBBMR_10M04	b	b	b	a	a	b	b	a	b	a	b	b	a	a	a	b	a	b	a	a	a	a	a	b	a	b	b	a	b	b	b	b	b	b	a	a	a	a	a	b	b	a	b	b	a	b	a	a	a
BBMR_10M20	b	b	a	a	b	a	a	a	b	a	b	a	b	a	b	a	b	b	a	a	b	b	b	b	b	a	b	b	a	a	b	b	b	b	b	a	b	a	b	a	a	b	b	b	a	a	a	b	b
BBMR_10M21	a	b	a	a	b	b	b	b	b	a	b	b	b	a	b	b	b	a	b	b	a	a	a	a	a	b	a	-	b	b	a	b	a	b	a	a	a	b	a	a	b	a	b	b	b	a	b	a	b
BBMR_10N17	b	b	b	a	a	b	a	a	b	b	b	a	a	b	b	a	a	a	a	b	b	b	b	a	b	a	a	a	b	a	a	a	a	a	a	a	a	b	a	a	b	a	a	b	b	a	b	a	a
BBMR_10N21*******	b	b	b	b	b	a	a	b	a	a	a	b	b	b	a	a	a	b	b	b	b	b	b	b	a	b	b	b	a	b	b	b	b	b	b	b	b	b	b	-	b	b	-	a	b	b	b	b	b
BBMR_10O10	a	b	a	a	b	b	b	b	b	a	b	b	a	a	b	b	b	a	b	b	a	a	a	a	a	b	a	b	b	b	a	b	a	b	a	a	a	b	a	a	b	a	b	b	b	a	b	a	b
BBMR_10O13	b	a	a	a	a	a	a	b	a	b	b	a	b	a	a	a	a	b	b	b	a	b	b	a	a	b	a	a	a	b	b	b	b	b	a	b	b	a	a	a	b	b	a	a	b	a	a	b	b
BBMR_10P01	b	a	a	a	b	b	a	a	a	b	b	a	b	-	b	b	b	a	a	b	b	b	b	a	b	a	b	b	a	a	a	b	b	b	a	b	b	a	b	b	a	a	a	b	b	a	a	b	b
BBMR_10P16	b	a	b	b	b	b	b	b	a	a	a	a	a	b	b	b	a	a	a	a	b	a	b	b	a	a	b	a	a	a	b	a	a	-	a	b	b	b	b	b	a	a	a	a	a	b	a	b	a
BBMR_11A02	a	b	a	b	b	a	a	b	a	a	a	b	b	b	a	a	a	a	a	a	b	b	b	b	a	b	a	b	a	a	a	a	a	b	b	a	a	b	b	b	b	a	b	a	b	b	b	a	b
BBMR_11A08	b	a	a	a	a	a	a	b	a	a	a	a	b	b	a	a	a	b	a	b	b	b	b	a	a	b	a	-	a	b	b	b	b	b	a	b	b	a	a	a	b	b	a	a	b	a	a	b	b
BBMR_11A09	b	b	b	b	a	a	a	b	b	b	a	b	b	b	b	a	b	a	b	b	a	a	b	a	a	b	b	b	b	b	b	a	a	b	a	a	a	b	b	a	a	b	b	b	a	b	b	a	a
BBMR_11A20	a	a	a	b	a	a	a	b	b	b	b	a	a	a	b	a	b	b	a	a	b	a	b	b	a	a	b	b	a	b	b	b	a	a	b	b	a	a	b	a	b	a	b	b	a	b	b	b	b
CBBMR_11B02*	b	a	b	a	a	a	a	b	a	a	b	a	a	b	a	a	a	b	b	b	a	b	b	a	a	b	a	a	a	b	b	b	b	b	a	b	b	a	a	b	b	a	a	a	b	a	a	b	b
BBMR_11B03**	a	b	b	b	b	a	a	b	a	a	b	a	b	b	b	a	a	a	b	b	a	b	a	b	b	a	b	b	a	a	b	a	a	b	a	b	a	a	b	b	b	a	a	b	b	a	b	b	a
BBMR_11B06	a	a	a	a	a	b	b	a	a	b	b	a	a	a	a	b	a	a	b	b	b	b	b	a	b	a	a	b	a	a	a	b	b	b	a	b	b	b	b	b	a	a	a	b	b	b	a	b	b
BBMR_11B19	b	a	a	a	b	b	a	a	a	b	b	a	b	a	b	b	b	a	a	b	b	b	b	a	b	a	b	b	a	a	a	b	b	b	a	b	b	a	b	b	a	a	a	b	b	a	a	b	b
BBMR_11C02	a	b	a	a	b	b	b	b	a	a	b	b	a	b	a	b	a	a	b	b	a	a	a	a	a	b	a	b	a	b	a	b	a	b	b	a	b	b	b	a	b	a	b	b	a	a	b	a	b
BBMR_11C03	b	b	a	-	b	b	b	b	b	b	a	a	a	b	b	b	b	b	b	a	a	a	a	b	b	a	a	b	a	a	a	a	a	a	a	b	b	a	b	a	b	b	b	b	a	a	a	b	a
CBBMR_11E02	b	b	a	b	b	b	a	a	a	a	b	a	a	a	a	b	a	a	b	b	b	b	a	a	b	a	a	a	a	b	b	a	b	b	a	b	b	a	a	b	a	a	a	a	b	a	a	a	a
BBMR_11G21	b	b	b	a	a	b	b	a	b	a	b	b	a	a	a	b	a	b	a	a	a	a	a	b	a	b	b	a	b	b	b	b	b	b	a	a	a	a	a	b	b	a	b	b	a	b	a	a	a
BBMR_11H02	a	b	a	b	b	a	b	b	a	b	a	a	a	a	a	a	a	b	b	b	b	b	a	b	a	b	b	b	b	a	b	a	a	b	a	a	a	a	a	a	b	b	b	a	a	a	a	b	b
BBMR_11H14	a	b	b	a	a	b	b	b	b	b	b	b	a	b	b	a	a	a	a	b	a	a	a	a	a	b	a	b	a	b	a	b	a	b	a	b	b	b	b	a	b	b	b	b	a	a	b	a	b
CBBMR_11I13	b	a	a	a	b	b	a	b	b	b	a	a	b	b	a	b	a	a	b	a	a	a	b	b	a	a	a	b	a	b	b	a	a	a	a	b	b	b	a	a	b	b	b	b	a	a	a	b	a
BBMR_11I21	b	b	b	b	b	b	a	a	a	a	b	b	a	a	a	a	a	a	a	b	b	b	a	b	a	a	b	b	b	a	a	b	a	b	b	a	a	a	a	b	a	a	-	a	a	b	b	a	b
BBMR_11K20	b	a	a	a	b	b	a	b	b	b	a	a	b	b	a	b	a	a	b	a	a	a	b	b	a	a	a	b	a	b	b	a	a	-	a	b	b	b	a	a	b	b	b	b	-	a	a	b	a
BBMR_11M01	a	a	a	b	a	b	a	a	a	a	a	b	b	a	a	a	a	a	a	b	a	b	b	b	a	b	b	b	b	a	b	b	b	b	b	b	a	a	b	a	b	a	a	a	b	a	b	a	b
BBMR_11M07*******	b	b	b	b	b	a	b	a	b	b	a	a	a	b	b	a	a	b	b	b	b	b	a	b	b	a	b	b	b	b	a	b	b	b	b	b	b	b	b	b	b	b	b	b	a	b	b	a	a
BBMR_11M24	b	b	a	b	b	b	a	a	a	b	b	b	a	a	a	a	a	a	a	b	b	b	a	b	a	b	b	b	b	a	a	b	a	b	b	a	a	a	a	b	a	a	b	a	a	b	b	a	b
BBMR_11N03	b	b	b	a	a	b	b	a	b	a	b	b	b	b	a	b	b	a	b	a	a	b	b	a	a	b	b	a	b	a	b	b	b	a	b	a	a	a	b	a	a	b	a	b	b	a	a	a	b
CBBMR_11N22	a	a	a	a	a	b	b	a	a	b	b	a	a	a	a	b	a	a	b	b	b	b	b	a	b	a	a	b	a	a	a	b	b	b	a	b	b	a	b	b	a	a	a	b	b	b	a	b	b
CBBMR_11O13	a	a	a	a	a	b	a	b	a	a	b	a	a	a	b	a	a	a	a	b	a	b	a	b	a	b	a	a	b	b	a	b	a	a	b	b	b	b	b	a	a	b	b	b	a	a	b	a	a
BBMR_11P02	a	a	b	-	b	a	b	a	b	b	a	a	a	b	b	a	a	b	b	a	b	b	a	b	b	a	b	b	b	b	a	b	a	a	a	b	b	b	b	a	a	b	b	b	a	b	b	a	a
BBMR_11P20	a	b	b	b	b	a	a	b	a	a	b	a	b	b	b	a	a	a	b	b	a	b	a	b	b	a	b	b	a	b	a	a	b	b	a	b	a	a	b	b	a	b	b	b	a	a	b	b	a
BBMR_11P21	a	b	b	a	b	b	b	b	b	b	b	b	a	b	b	a	a	a	a	b	a	a	a	a	a	b	a	b	a	b	a	b	a	b	b	b	b	b	b	a	b	b	b	b	a	a	b	a	b
BBMR_12A06	a	a	a	b	a	a	b	a	a	b	a	a	b	a	a	a	a	a	a	b	a	a	a	a	a	b	a	a	a	b	a	a	b	a	b	b	b	b	b	a	b	b	b	b	a	b	b	a	b
BBMR_12A13	b	b	a	b	b	b	b	a	a	b	b	a	a	a	a	a	a	a	b	b	a	b	a	a	b	a	a	-	b	b	b	a	b	b	a	b	a	a	a	b	a	a	a	a	b	a	b	a	a
BBMR_12B05	a	a	a	b	a	b	a	a	a	a	a	b	b	a	a	a	a	a	a	b	a	b	b	b	a	b	b	b	b	a	b	b	b	b	b	b	a	a	b	a	b	a	a	a	b	a	b	a	b
BBMR_12B06	a	b	b	b	b	a	b	b	a	a	b	b	b	a	a	a	a	a	a	a	a	a	a	b	a	b	a	b	b	a	b	a	a	b	b	a	b	b	b	b	b	a	b	a	a	b	b	a	b
BBMR_12B11	a	b	a	b	b	a	b	b	a	a	a	a	b	a	a	a	b	b	a	a	b	b	a	b	a	b	-	b	a	a	a	a	a	b	b	a	a	b	b	b	b	a	a	a	b	b	b	b	b
BBMR_12B18	b	b	b	a	a	a	a	b	a	b	a	b	a	b	b	a	b	b	b	b	a	a	b	a	b	a	a	b	b	b	b	a	a	b	a	a	a	b	b	b	a	b	b	b	a	b	b	a	a
BBMR_12C06	b	a	b	a	a	a	a	b	a	a	b	a	a	a	a	a	a	b	b	b	a	a	a	a	a	b	a	a	a	b	b	b	b	b	b	b	b	a	a	b	b	a	a	a	a	a	b	b	b
BBMR_12C09	a	b	a	a	b	b	b	b	b	a	b	b	a	a	b	b	b	a	b	b	a	a	a	a	a	b	a	b	b	b	a	b	a	b	a	a	a	b	a	a	b	a	b	b	b	a	b	a	b
BBMR_12C16	b	b	b	a	b	a	a	a	b	a	b	a	b	a	b	a	b	b	b	a	b	a	b	b	b	a	b	b	a	a	b	b	b	-	b	a	b	a	b	a	a	b	b	a	a	b	b	b	a
BBMR_12D02	b	b	b	b	b	a	a	b	b	b	a	b	b	b	b	a	b	a	b	b	b	a	b	a	a	b	b	b	b	b	b	a	a	b	a	a	a	b	b	a	a	b	b	b	a	b	b	a	b
BBMR_12D11	b	b	b	a	a	b	b	a	b	a	a	b	b	b	b	b	b	a	b	b	a	b	b	b	a	a	a	a	b	a	b	b	b	a	a	a	a	a	b	a	a	b	a	b	b	a	a	a	a
BBMR_12D19	a	b	a	b	b	b	a	b	a	b	b	b	b	a	b	a	b	b	b	a	a	a	b	a	b	b	a	a	a	b	a	a	a	a	a	b	b	a	a	b	b	a	b	b	a	b	b	a	a
BBMR_12F02*	b	a	a	a	b	b	a	b	b	b	a	a	-	b	a	b	a	a	b	a	a	a	b	b	a	a	a	b	a	b	a	a	a	a	a	b	b	a	b	a	b	b	-	b	-	a	a	b	a
BBMR_12G02	a	-	a	b	b	b	a	b	a	b	b	b	b	b	b	a	b	b	b	a	a	a	b	a	b	a	a	a	a	b	a	a	a	a	a	b	b	a	a	b	b	a	b	b	a	b	b	a	a
BBMR_12H08	b	b	a	b	b	b	a	a	a	b	b	b	-	a	a	a	a	a	a	b	b	b	a	b	a	b	b	b	b	a	a	b	a	b	b	a	a	a	a	b	a	a	b	a	a	b	b	a	b
BBMR_12H24	a	a	a	b	a	b	a	a	a	a	a	b	b	a	a	a	a	a	a	b	a	b	b	b	a	b	b	b	b	a	b	b	b	b	b	b	a	a	b	a	b	a	a	a	b	a	b	a	b
CBBMR_12I02	b	a	b	a	a	a	a	b	a	a	b	a	a	a	a	a	a	b	b	b	a	a	a	a	a	b	a	a	a	b	b	b	b	b	b	b	b	a	a	b	b	a	a	a	a	a	b	b	b
CBBMR_12J04	a	b	a	a	a	b	a	b	b	a	b	b	a	b	b	a	b	b	b	a	b	a	b	a	b	b	b	a	b	b	b	b	a	a	b	a	b	b	a	b	a	a	a	a	b	b	a	b	b
BBMR_12J05	b	b	a	a	b	b	a	a	a	b	b	a	b	a	b	a	b	a	a	b	b	b	b	b	b	a	b	b	a	a	a	b	b	b	b	a	b	a	b	b	a	a	a	b	b	a	a	b	b
BBMR_12J10	b	a	a	b	b	a	b	b	a	a	b	b	b	a	a	b	b	b	a	a	a	a	a	b	b	b	a	b	b	a	a	a	b	b	a	b	a	a	b	b	b	a	a	a	a	a	b	b	a
BBMR_12J16	a	a	b	b	b	a	b	a	b	b	a	a	a	b	b	a	a	b	b	a	b	b	a	b	b	a	b	b	b	b	a	b	a	a	a	b	b	b	b	a	a	b	b	b	a	b	b	a	a
BBMR_12K17	a	a	a	a	a	b	a	b	a	a	b	a	a	a	b	a	a	a	a	b	a	b	a	b	a	b	a	a	b	b	a	b	a	a	b	b	b	b	b	a	a	b	b	b	a	a	b	a	a
BBMR_12L07	b	b	b	b	b	a	b	b	b	b	a	b	b	b	a	-	a	a	a	a	a	a	b	b	a	b	a	b	-	a	b	b	a	b	b	a	a	b	b	b	b	a	a	a	b	a	b	b	a
BBMR_12M19	a	b	a	b	a	a	b	a	a	a	b	a	b	b	b	b	b	b	a	b	b	b	b	a	b	a	a	b	a	a	b	b	a	b	a	b	b	b	a	b	b	a	a	b	a	a	b	b	b
BBMR_12M21*******	b	b	b	b	b	a	a	b	a	a	a	b	b	b	a	a	a	b	b	b	b	b	b	b	a	b	b	b	a	b	b	b	b	-	b	b	b	b	b	-	b	b	-	a	-	b	b	b	b
BBMR_12N12	a	b	a	b	b	a	b	b	a	b	a	a	a	a	a	-	a	b	b	b	b	b	a	b	a	b	b	b	b	a	b	a	a	b	a	a	a	a	a	a	b	b	b	a	a	a	a	b	b
BBMR_12N17	a	a	b	b	b	a	b	a	b	b	a	a	a	b	b	a	a	b	b	a	b	b	a	b	b	a	b	b	b	b	a	b	a	a	a	b	b	b	b	a	a	b	b	b	a	b	b	a	a
BBMR_12N19	a	b	a	b	b	a	b	b	a	b	a	a	b	a	a	a	a	b	b	b	b	b	a	b	a	b	b	b	b	a	b	a	a	b	a	a	a	a	a	a	b	b	b	a	a	a	a	b	b
BBMR_12O01	a	b	a	b	a	b	a	a	a	b	b	a	b	b	b	b	b	b	a	b	b	b	a	b	b	a	a	a	a	a	b	b	b	b	b	b	b	b	a	a	a	b	a	b	b	a	b	b	b
BBMR_12O15	b	b	a	b	b	b	a	a	a	a	b	a	-	a	a	b	a	a	b	b	b	b	a	a	b	a	a	a	a	b	b	a	b	b	a	b	b	a	a	b	a	a	a	a	b	a	a	a	a
BBMR_12O23	a	b	b	b	b	a	a	b	a	a	a	b	b	b	a	a	a	a	b	a	b	b	a	b	a	b	b	a	a	a	b	a	b	b	b	a	b	b	b	b	b	a	b	a	b	b	b	a	b
BBMR_12P03	a	b	b	a	a	b	a	b	b	a	b	b	b	b	b	a	b	b	b	a	b	a	a	a	b	a	b	a	b	a	b	b	b	b	b	a	a	b	a	b	a	a	a	a	b	b	a	b	b
BBMR_12P18	a	a	b	b	b	a	b	a	b	b	a	a	a	b	b	a	a	b	b	a	b	b	a	b	b	a	b	b	b	b	a	b	a	a	b	b	b	b	b	a	a	b	b	b	a	b	b	a	a
BBMR_12P21	b	-	b	b	b	b	a	a	a	a	b	b	a	a	a	a	a	a	a	b	b	b	a	b	a	a	b	b	b	a	a	b	a	b	b	a	a	a	a	b	a	a	b	a	a	b	b	a	b
BBMR_13A02	b	b	b	a	a	b	a	a	b	b	b	a	a	b	b	a	a	a	a	b	b	b	b	a	b	a	a	a	b	a	a	a	a	a	a	a	a	b	a	a	b	a	a	b	b	a	b	a	a
CBBMR_13A04	a	b	a	b	b	b	a	b	b	b	a	b	b	a	b	a	a	a	a	a	a	b	b	a	b	b	b	a	a	a	b	a	a	a	b	b	a	b	a	a	b	a	b	b	b	a	b	a	b
BBMR_13A05	a	b	b	b	b	a	a	b	b	a	b	a	a	b	b	a	a	a	a	b	a	b	a	a	b	a	b	b	a	a	b	a	a	b	b	a	a	b	b	a	b	b	a	b	b	b	a	b	a
BBMR_13A16	a	b	b	b	a	a	a	b	b	b	a	a	a	b	b	a	a	a	a	b	a	a	a	a	b	a	b	b	a	a	a	a	b	a	b	a	a	b	b	a	b	b	a	b	b	b	a	b	a
CBMR_13A17*	a	a	a	a	b	b	a	a	b	b	a	a	a	a	b	b	a	a	b	b	a	b	a	b	b	b	b	b	a	a	b	a	b	a	b	b	a	a	b	b	a	b	a	b	b	a	b	a	a
BBMR_13B05	b	b	a	b	b	b	a	a	a	a	b	a	b	b	a	b	a	a	b	b	b	b	a	b	b	b	a	a	a	b	b	a	b	b	a	b	b	b	a	b	b	a	a	a	b	a	a	a	a
BBMR_13B08	a	b	a	b	a	b	a	a	a	b	b	a	b	b	b	b	b	b	a	b	b	b	a	b	b	a	a	a	a	a	b	b	b	b	b	b	b	b	a	a	a	b	a	b	b	a	b	b	b
BBMR_13B21	a	a	b	b	b	a	b	a	b	b	a	a	a	b	b	a	a	b	b	a	b	b	a	b	b	a	b	b	b	b	a	b	a	a	a	b	b	b	b	a	a	b	b	b	a	b	b	a	a
BBMR_13B22	a	b	b	b	b	a	a	b	a	a	a	b	b	b	a	a	a	a	b	a	b	b	b	b	a	b	a	b	a	a	a	a	b	b	b	a	b	b	b	b	b	a	b	-	b	b	b	a	b
BBMR_13C01	a	b	b	a	b	b	b	b	a	b	b	b	-	b	b	b	a	a	a	b	a	a	a	a	-	b	a	b	a	b	a	b	a	b	b	b	b	b	b	a	b	b	b	b	a	a	b	a	b
BBMR_13C08	a	a	b	b	a	b	a	b	b	a	b	a	-	b	a	a	a	b	a	b	b	b	a	a	b	a	b	a	b	a	b	b	a	b	b	a	a	a	a	b	b	a	a	a	b	a	a	b	a
BBMR_13D04	a	a	a	a	a	b	b	a	a	b	b	a	a	a	a	b	a	a	b	b	b	b	b	a	b	a	a	b	a	a	a	b	b	b	a	b	b	a	b	b	a	a	a	b	b	b	a	b	b
BBMR_13E08	b	a	b	b	b	b	b	b	a	b	a	a	a	b	b	b	a	a	a	a	b	a	b	b	a	b	b	a	a	a	b	a	a	a	a	b	b	a	b	b	a	a	a	b	a	a	b	b	a
CBBMR_13E15	b	b	a	a	a	b	a	b	b	a	b	b	a	b	b	a	b	b	b	a	b	a	b	a	b	b	b	a	b	b	b	b	a	a	b	a	b	b	a	b	a	a	a	a	b	b	a	b	b
BBMR_13F06	b	a	a	a	b	b	a	b	b	b	a	a	b	b	a	b	a	a	b	a	a	a	b	b	a	a	a	b	a	b	b	a	a	-	a	b	b	b	a	a	b	b	b	b	a	a	a	b	a
BBMR_13F14	b	b	b	b	a	a	a	b	b	b	a	b	b	b	b	a	b	a	b	b	a	a	b	a	a	b	b	b	b	b	b	a	a	b	a	a	a	b	b	a	a	b	b	b	a	b	b	a	a
BBMR_13F21	b	a	b	b	b	b	a	b	a	b	a	a	a	a	b	b	a	a	a	a	b	a	b	b	a	b	b	a	a	a	b	a	a	b	b	a	b	a	b	b	a	a	a	b	a	a	b	b	a
BBMR_13G15	a	a	a	b	a	b	a	b	b	a	b	a	a	a	b	b	b	a	b	b	a	b	a	a	b	a	a	b	b	b	b	b	b	-	b	b	b	b	b	a	a	b	b	b	a	a	b	a	a
BBMR_13H12	b	a	a	a	b	b	a	a	a	b	b	a	b	a	b	b	b	a	a	b	b	b	b	a	b	a	b	b	a	a	a	b	b	b	a	b	b	a	b	b	a	a	a	b	b	a	a	b	b
BBMR_13I13	a	b	b	a	b	b	b	b	a	b	b	b	a	b	b	b	a	a	a	b	a	a	a	a	a	b	a	b	a	b	a	b	a	b	b	b	b	b	b	a	b	a	b	b	a	a	b	a	b
BBMR_13I21*	a	b	b	b	b	a	a	b	a	a	b	a	b	b	b	-	a	a	b	b	a	b	a	b	b	a	b	b	a	b	a	a	b	b	a	b	a	a	b	b	a	b	b	b	a	a	b	b	a
BBMR_13I24	a	a	a	b	a	b	a	a	a	a	a	b	b	a	a	a	a	a	a	b	a	b	b	b	a	b	b	b	b	a	b	b	b	b	b	b	a	a	b	a	b	a	a	a	b	a	b	a	b
BBMR_13J02	a	b	b	b	b	a	a	b	a	a	a	b	b	b	a	a	a	a	a	a	a	b	a	b	a	b	b	a	a	a	b	a	b	b	b	a	b	b	b	b	b	a	b	a	b	b	b	a	b
BBMR_13K23	a	a	a	a	a	b	b	a	a	b	b	a	a	a	a	b	a	a	b	b	b	b	b	a	b	a	a	b	a	a	a	b	b	b	a	b	b	b	b	b	a	a	a	b	b	b	a	b	b
BBMR_13L04	b	a	a	a	a	a	a	b	a	b	a	a	b	a	a	a	a	b	a	b	a	b	b	a	a	b	a	a	a	b	b	b	b	b	a	b	b	a	a	a	b	b	a	a	b	a	a	b	b
BBMR_13L14	a	b	a	a	b	b	b	b	a	a	b	b	a	b	b	b	a	a	b	b	a	a	a	a	a	b	a	b	b	b	a	b	a	b	b	a	b	b	b	a	b	a	b	b	a	a	b	a	b
BBMR_13L16*	a	a	a	b	a	a	b	a	a	b	a	a	b	a	a	a	a	a	a	b	a	a	a	a	a	b	a	a	a	b	a	a	b	a	b	b	b	b	b	a	b	b	b	b	a	b	b	a	b
CBBMR_13M23	b	b	b	a	b	b	b	b	b	b	a	b	a	b	b	a	a	b	b	a	a	a	a	a	a	b	a	b	a	b	b	b	a	b	a	b	b	b	b	b	b	a	b	b	a	a	b	b	b
CBBMR_13N08	b	b	a	b	b	a	a	a	b	a	b	a	b	a	b	a	b	b	a	a	b	a	b	b	b	a	b	b	a	a	b	b	b	a	b	a	b	a	b	a	a	b	b	b	a	a	b	b	b
BBMR_13N23*	b	a	b	a	a	a	a	b	a	a	b	a	a	b	a	a	a	b	b	b	a	b	b	a	a	b	a	a	a	b	b	b	b	b	a	b	b	a	a	b	b	a	a	a	b	a	a	b	b
CBBMR_13O05	a	b	a	a	b	b	b	b	b	a	a	b	b	a	b	b	b	a	a	b	a	a	a	a	a	b	a	b	b	b	a	b	a	b	a	a	a	b	a	a	b	a	b	b	a	a	b	a	b
BBMR_13O08	b	b	a	-	b	a	a	a	b	a	b	a	b	a	b	a	b	b	a	a	b	a	b	b	b	a	b	b	a	a	b	b	b	a	b	a	b	a	b	a	a	b	b	b	a	a	b	b	b
CBBMR_13O22	b	a	a	a	b	b	a	b	b	b	a	a	b	b	a	b	a	a	b	a	a	a	b	b	a	a	a	b	a	b	a	a	a	a	a	b	b	a	b	a	b	b	b	b	a	a	a	b	a
BBMR_13P08**	a	a	a	a	a	b	a	b	a	a	b	a	a	a	b	a	a	a	a	b	a	b	a	b	a	b	a	a	b	a	a	b	a	a	b	b	b	a	a	a	a	b	b	b	a	a	b	a	a
CBBMR_13P16	a	b	b	b	b	a	a	b	a	a	b	a	b	b	b	a	a	a	b	b	a	b	a	b	b	a	b	b	a	b	a	a	b	b	a	b	a	a	a	b	a	b	b	b	a	a	b	b	a
BBMR_13P18	b	a	a	a	b	b	a	b	b	b	a	a	b	b	a	b	a	a	b	a	a	a	b	b	a	a	a	b	a	b	b	a	a	a	a	b	b	b	a	a	b	b	b	b	a	a	a	b	a
BBMR_14B07	b	a	b	b	a	a	b	b	a	b	b	a	a	b	b	b	b	b	a	b	b	a	a	a	a	a	b	b	a	a	a	a	a	a	b	a	b	a	b	b	a	b	a	a	b	a	b	b	b
CBBMR_14C18	b	b	b	a	a	b	b	b	b	b	a	b	a	b	b	a	a	b	b	a	a	a	a	a	a	b	a	b	a	b	b	b	a	b	a	b	b	b	b	b	b	a	b	b	a	a	b	b	b
BBMR_14C20	b	b	a	a	b	b	b	b	b	b	a	a	a	b	b	b	b	b	b	a	a	a	a	b	b	a	a	b	a	a	a	a	a	a	a	b	b	a	b	a	b	b	b	b	a	a	a	b	a
BBMR_14C21	b	b	b	a	a	b	b	a	b	a	b	b	a	a	a	b	a	b	a	a	a	a	a	b	a	b	b	a	b	b	b	b	b	b	a	a	a	a	a	b	-	a	-	b	a	b	a	a	a
BBMR_14D02	a	b	b	a	b	a	a	a	b	a	b	b	-	-	a	a	b	b	a	b	b	a	b	b	b	a	b	b	a	a	b	a	b	a	a	a	b	a	b	a	a	a	a	a	a	b	b	b	a
CBBMR_14D07	a	b	b	b	b	a	a	b	a	a	a	b	b	b	a	a	a	a	a	a	b	b	b	b	a	b	a	b	a	a	a	a	a	b	b	a	a	b	b	b	b	a	b	a	b	b	b	a	b
BBMR_14D17*******	b	a	a	a	b	b	a	b	b	b	a	a	b	b	a	b	a	b	b	b	a	b	b	b	a	b	a	b	a	b	b	b	b	b	a	b	b	b	a	a	b	b	b	b	b	a	a	b	b
BBMR_14D23*	a	a	a	b	a	a	b	a	a	b	a	a	b	a	a	a	a	a	a	b	a	a	a	a	a	b	a	a	a	b	a	a	b	a	b	b	b	b	b	a	b	b	b	b	a	b	b	a	b
CBBMR_14E05	a	b	b	b	b	a	a	b	a	a	a	b	b	b	a	a	a	a	b	a	b	b	a	b	a	b	-	a	a	a	b	a	b	b	b	a	b	b	b	b	b	a	-	a	b	b	b	a	b
BBMR_14F17	b	b	a	b	b	a	b	b	b	a	b	b	b	a	a	b	a	a	a	b	a	a	a	b	a	b	a	b	b	a	b	a	a	b	b	a	b	a	b	a	b	a	b	b	a	b	b	a	b
BBMR_14F23	a	b	b	b	b	a	a	b	a	a	a	b	b	b	a	a	a	a	b	a	a	b	a	b	a	b	b	a	a	a	b	a	b	b	b	a	b	b	b	b	b	a	b	a	b	b	b	a	b
BBMR_14F24	a	a	a	a	b	b	a	b	a	b	b	a	b	b	a	b	b	a	b	a	a	a	b	b	a	b	a	b	a	b	b	a	a	a	a	b	b	a	a	a	-	b	b	b	a	a	a	a	a
BBMR_14G04	a	b	a	b	b	a	b	b	a	b	a	a	b	a	a	a	a	b	b	b	b	b	a	b	a	b	b	b	b	a	b	a	a	b	a	a	a	a	a	a	b	b	b	a	a	a	a	b	b
BBMR_14G12	a	b	b	b	b	a	a	b	a	a	a	b	b	b	a	a	a	a	b	a	a	b	a	b	a	b	b	a	a	a	b	a	b	b	b	a	b	b	b	b	b	a	b	a	b	b	b	a	b
CBBMR_14G17	a	b	b	b	b	a	a	b	a	a	a	b	b	b	a	a	a	a	a	a	b	b	b	b	a	b	a	b	a	a	a	a	a	b	b	a	a	b	b	b	b	a	b	a	b	b	b	a	b
BBMR_14H01	b	b	a	b	a	a	b	a	a	a	a	a	a	b	a	a	a	a	b	b	b	b	a	b	b	a	b	a	b	b	a	b	b	b	b	a	b	b	b	b	b	a	a	b	a	b	a	a	a
BBMR_14H09	a	b	a	a	b	b	b	b	b	a	b	b	b	a	b	b	b	a	b	b	a	a	a	a	a	b	a	b	b	b	a	b	a	b	a	a	a	b	a	a	b	a	b	b	-	a	b	a	b
BBMR_14I08	a	b	b	a	b	a	a	a	b	a	b	a	b	a	a	a	b	b	b	a	b	a	b	b	b	a	b	b	a	a	b	b	b	a	b	a	b	a	b	a	a	a	b	a	a	b	b	b	a
BBMR_14I15	a	a	a	a	a	b	b	a	a	b	b	a	a	a	a	b	a	a	b	b	b	b	b	a	b	a	a	b	a	a	a	b	b	b	a	b	b	b	b	b	a	a	a	b	b	b	a	b	b
CBBMR_14J04	b	b	b	a	a	b	b	a	b	a	a	b	b	b	b	b	b	a	b	b	a	b	b	b	a	b	a	a	b	a	b	b	b	a	a	a	a	a	b	a	a	b	a	b	b	a	a	a	a
BBMR_14J08	b	b	b	b	a	b	a	a	b	b	b	a	a	b	b	a	a	b	a	b	b	b	a	b	b	a	a	a	a	a	b	a	a	a	a	a	a	b	a	a	b	a	b	-	a	a	b	a	a
CBBMR_14J14	b	a	b	a	a	a	a	b	a	a	b	a	a	a	a	a	a	b	b	b	a	a	a	a	a	b	a	a	a	b	b	b	b	b	b	b	b	a	a	b	b	a	a	a	a	a	b	b	b
BBMR_14J17	b	b	a	a	a	a	a	a	b	a	b	b	a	a	b	b	a	b	a	a	b	a	a	b	a	b	b	b	a	b	b	b	a	a	b	a	a	a	b	a	b	b	b	a	b	b	b	a	a
BBMR_14J22	b	b	a	a	b	a	a	b	b	a	b	b	a	a	b	b	a	b	a	a	b	a	a	a	b	b	b	b	b	b	b	b	a	a	b	a	a	b	a	b	b	a	a	a	b	b	b	b	a
BBMR_14L11	b	b	a	a	a	b	b	a	b	a	a	a	a	b	b	b	b	a	a	b	a	a	b	b	a	b	b	a	b	a	b	a	a	b	a	a	b	b	a	b	b	a	a	a	b	b	a	a	b
BBMR_14L17	b	b	a	b	b	b	a	a	a	a	b	a	b	b	a	b	a	a	b	b	b	b	a	b	b	b	a	a	a	b	b	a	b	b	a	b	b	b	a	b	b	a	a	a	b	a	a	a	a
CBBMR_14M22	b	b	b	a	a	b	b	a	b	a	b	b	a	a	a	b	a	b	a	a	a	a	a	a	a	b	b	a	b	a	b	b	b	b	a	a	a	a	a	b	a	a	b	b	a	a	a	a	b
CBBMR_14O07	a	b	a	a	b	b	b	b	b	a	a	b	b	a	b	b	b	a	a	b	a	a	a	a	a	b	a	b	b	b	a	b	a	b	a	a	a	b	a	a	b	a	b	b	b	a	b	a	b
BBMR_14P01**	a	a	a	a	b	b	a	a	b	b	a	a	a	a	b	a	a	a	b	b	a	b	a	b	b	b	b	a	a	a	b	a	b	a	b	b	a	a	b	b	a	b	a	b	b	a	b	a	b
BBMR_14P05	a	b	b	b	b	a	a	b	a	a	a	b	b	b	a	a	a	a	b	a	b	b	a	b	a	b	b	a	a	a	b	a	-	b	b	a	b	b	b	b	b	a	b	-	-	b	b	a	b
CBBMR_14P08	b	b	b	a	a	b	b	a	b	a	a	b	b	b	a	b	b	a	b	a	a	b	b	a	a	b	b	a	b	a	b	b	b	a	b	a	a	a	b	a	a	b	a	b	b	a	a	a	b
BBMR_14P14*	a	-	a	b	b	a	b	b	a	a	a	a	b	a	a	a	b	b	a	a	b	b	b	b	a	b	a	b	a	a	a	a	a	b	b	a	a	b	b	b	-	a	a	a	b	b	b	b	b
CBMR_15A02	b	b	a	a	b	b	b	b	b	b	a	a	a	b	b	b	b	b	b	a	a	a	a	b	b	a	a	b	a	a	a	a	a	a	a	b	b	a	b	a	b	b	b	b	a	a	a	b	a
BBMR_15A14	a	b	a	b	b	a	b	b	a	b	a	a	a	a	a	a	a	b	b	b	b	b	a	b	a	b	b	b	b	a	b	a	a	b	a	a	a	a	a	a	b	b	a	a	b	a	a	b	b
CBBMR_15B01	a	b	a	a	b	b	b	b	b	a	a	b	b	a	b	b	b	a	a	b	a	a	a	a	a	b	a	b	b	b	a	b	a	b	a	a	a	b	a	a	b	a	b	b	b	a	b	a	b
BBMR_15B07	a	b	b	b	b	a	b	b	a	a	b	b	b	a	a	a	a	a	a	a	a	a	a	b	a	b	a	b	b	a	b	a	a	b	b	a	b	b	b	b	b	a	b	a	a	b	b	a	b
CBBMR_15B17	b	a	b	b	b	b	a	a	a	a	a	a	b	b	a	b	b	a	b	b	b	b	a	b	b	b	a	a	a	b	b	a	b	a	a	b	b	b	a	a	b	a	a	b	b	b	a	a	a
BBMR_15B19	a	b	b	a	a	b	a	b	b	a	b	b	a	b	b	a	b	b	b	a	b	a	b	a	b	b	b	a	b	a	b	b	a	a	b	a	b	b	a	b	a	a	a	a	b	b	a	b	b
CBBMR_15D08	a	b	a	a	a	b	a	b	b	a	b	b	a	b	b	a	b	b	b	a	b	a	b	a	b	b	b	a	b	b	b	b	a	a	b	a	b	b	a	b	a	a	a	a	b	b	a	b	b
BBMR_15D10	a	b	a	b	b	a	a	b	a	a	a	a	b	b	a	a	b	a	a	a	b	b	b	b	a	b	a	b	a	a	a	a	a	b	b	a	a	b	b	b	b	a	a	a	b	b	b	b	b
BBMR_15D11	a	b	a	a	b	b	a	b	a	b	b	a	b	b	b	b	b	a	b	a	a	a	b	b	a	b	a	b	a	a	b	a	a	a	a	b	b	a	a	a	a	b	b	b	a	a	a	a	a
BBMR_15D18	a	b	a	a	b	b	b	b	a	a	b	b	a	b	a	b	a	a	b	b	a	a	a	a	a	b	a	b	a	b	a	b	a	b	b	a	b	b	b	a	b	a	b	b	a	a	b	a	b
BBMR_15E22*******	b	b	b	b	b	b	b	b	a	b	b	b	b	a	a	a	a	b	a	b	b	b	b	b	b	b	b	b	b	b	b	b	a	b	b	b	a	a	a	b	b	a	b	b	b	b	b	a	b
BBMR_15F08	b	b	a	a	b	a	a	b	b	a	b	b	a	a	b	b	a	b	a	a	b	a	a	a	b	b	b	b	b	b	b	b	a	-	b	a	a	b	a	b	b	a	a	a	b	b	b	b	a
CBBMR_15H01	a	a	a	-	a	b	a	b	b	a	b	a	a	a	b	b	b	a	b	b	a	b	a	a	b	a	a	b	b	b	b	-	b	a	b	b	b	a	b	a	a	b	b	b	a	a	b	a	a
BBMR_15J22	a	a	b	b	b	a	b	a	b	b	a	a	a	b	b	a	a	b	b	a	b	b	a	-	b	a	b	b	b	b	a	b	a	a	b	b	b	b	b	a	a	b	b	b	a	b	b	a	a
CBBMR_15K01	a	a	b	b	a	b	a	b	b	a	b	a	-	b	a	a	a	b	a	b	b	b	a	a	b	a	b	a	b	a	b	b	a	b	b	a	a	a	a	b	b	a	a	a	b	a	a	b	a
CBBMR_15L03	a	b	b	a	a	b	a	b	b	a	b	b	a	b	b	a	b	b	a	a	b	b	a	a	b	a	b	a	b	a	b	b	b	b	b	a	a	b	a	b	a	a	a	a	b	b	a	b	b
BBMR_15L11	a	b	b	a	b	b	b	b	a	b	b	b	b	b	b	a	b	a	b	a	a	a	b	a	a	b	a	b	b	a	b	a	a	a	a	b	b	a	a	b	a	-	b	b	a	a	a	a	a
BBMR_15L20	a	a	a	b	a	b	a	a	a	a	a	b	b	a	a	a	a	a	a	b	a	b	b	b	a	b	b	b	b	a	b	b	b	b	b	b	a	a	b	a	b	a	a	a	b	a	b	a	b
CBBMR_15L23	a	b	a	a	a	b	a	b	b	a	b	b	a	b	b	a	b	b	b	a	b	a	b	a	b	b	b	a	b	b	b	b	a	a	b	a	b	b	a	b	a	a	a	a	b	b	a	b	b
BBMR_15L24	b	b	b	b	a	b	a	a	b	b	b	a	-	b	b	a	a	b	a	b	b	b	a	b	b	a	a	a	a	a	b	a	a	a	a	a	a	b	a	a	b	a	b	a	a	a	b	a	a
CBBMR_15O14*	b	a	a	b	a	a	a	a	b	a	b	a	b	a	a	a	b	b	a	a	a	b	a	a	b	a	a	a	a	a	a	a	a	b	a	a	b	a	a	a	a	b	b	a	a	a	a	a	a
BBMR_15O22	a	b	a	a	b	b	b	b	b	a	a	b	b	a	b	b	b	a	a	b	a	a	a	a	a	b	a	b	b	b	a	b	a	b	a	a	a	b	a	a	b	a	b	b	b	a	b	a	b
BBMR_15O24	b	b	b	a	a	b	b	a	b	a	b	b	a	a	a	b	a	b	a	a	a	a	a	a	a	b	b	a	b	a	b	b	b	b	a	a	a	a	a	b	a	a	b	b	a	a	a	a	b
BBMR_15P07	b	b	b	a	a	b	b	a	b	a	-	b	b	b	b	b	b	a	b	b	a	b	b	b	a	b	a	a	b	a	b	b	b	a	b	a	a	a	b	a	a	b	a	b	b	a	a	a	a
BBMR_15P09	a	b	b	b	b	b	a	b	a	a	a	b	b	a	b	a	b	b	a	b	b	b	b	b	b	b	b	b	a	b	a	a	b	b	a	a	b	a	b	b	a	b	b	a	a	b	b	a	a
CBBMR_15P19*	a	b	a	b	a	b	a	a	a	b	b	a	a	b	b	b	b	b	a	b	b	b	a	b	b	a	a	a	a	a	b	b	b	a	b	b	b	b	b	a	b	b	a	b	b	a	b	b	b
BBMR_15P24	a	b	b	a	b	b	b	b	a	b	b	b	a	b	b	b	a	a	a	b	a	a	a	a	a	b	a	b	a	a	a	b	a	b	b	b	b	b	b	a	b	b	b	b	a	a	b	a	b
BBMR_16A03	b	a	a	a	b	b	a	b	b	b	a	a	b	b	a	b	a	a	b	a	a	a	b	b	a	a	a	b	a	b	a	a	a	a	a	b	b	a	b	a	b	b	b	b	a	a	a	b	a
BBMR_16A08	b	a	a	a	b	b	a	b	b	b	a	a	b	b	a	b	a	a	b	a	a	a	b	b	a	a	a	b	a	b	b	a	a	a	a	b	b	b	a	a	b	b	b	b	a	a	a	b	a
BBMR_16A14	b	b	a	a	b	a	a	a	b	a	b	b	a	a	b	b	a	b	a	a	b	a	a	a	b	b	b	b	a	b	b	b	a	a	b	a	a	b	a	b	b	a	a	a	b	b	b	b	a
CBBMR_16B03	b	a	b	b	b	b	b	b	a	b	a	a	a	b	b	b	a	a	a	a	b	a	b	b	a	b	b	a	a	a	b	a	a	a	a	b	b	a	b	b	a	a	a	b	a	a	b	b	a
BBMR_16B04	b	b	a	b	b	a	a	a	b	a	b	a	b	a	b	a	b	b	a	a	b	a	b	b	b	a	b	b	a	a	b	b	b	a	b	a	b	a	b	a	a	b	b	-	a	a	b	b	b
BBMR_16B06	b	b	a	a	b	b	b	a	b	b	a	b	a	b	a	b	a	b	b	a	a	b	a	b	a	a	a	a	b	b	a	a	a	b	a	b	b	b	a	b	b	a	b	a	a	a	b	b	a
CBBMR_16B15	a	b	b	a	b	b	b	b	a	b	b	b	a	b	b	a	a	a	a	b	a	a	a	a	a	b	a	b	a	a	a	b	a	b	b	b	b	b	b	a	b	b	b	b	a	a	b	a	b
CBBMR_16B20	b	b	b	a	a	a	a	b	a	b	a	b	b	b	b	a	b	b	b	b	a	a	b	a	b	a	a	b	b	b	b	a	a	b	a	a	a	b	b	b	a	b	b	b	a	b	b	a	a
BBMR_16C10	b	b	a	a	b	a	a	a	b	a	b	a	b	-	b	a	b	b	a	a	b	b	b	b	b	a	b	b	a	a	b	b	b	b	b	a	b	a	b	a	a	b	b	b	a	a	a	b	b
BBMR_16D11	a	a	a	b	a	b	a	b	a	a	b	a	b	b	b	b	b	a	a	b	a	b	b	a	b	a	-	b	a	b	b	b	b	a	a	b	b	b	b	a	b	b	b	b	a	a	b	a	a
BBMR_16D12	a	b	b	b	b	a	b	b	a	a	a	b	b	b	a	a	a	a	a	a	a	b	a	b	a	b	b	a	a	a	b	a	b	b	b	a	b	b	b	b	b	a	b	a	b	b	b	a	b
BBMR_16F08	a	b	a	b	a	b	a	a	a	b	b	a	b	b	b	b	b	b	a	b	b	b	a	b	b	a	a	a	a	a	b	b	b	b	b	b	b	b	a	a	a	b	a	b	b	a	b	b	b
BBMR_16H01	b	b	b	b	b	a	a	b	b	b	a	b	b	b	b	a	b	a	b	b	b	a	b	a	a	b	b	-	-	b	b	a	a	b	a	a	a	b	b	a	a	b	b	b	a	b	b	a	b
BBMR_16H23	a	a	a	b	a	b	b	a	b	b	b	b	a	b	b	a	a	a	b	b	a	b	b	b	a	b	b	-	-	a	b	b	b	b	b	b	a	a	b	a	b	b	a	a	b	a	a	a	a
BBMR_16J04	a	b	b	b	b	a	a	b	a	a	a	b	b	b	a	a	a	a	a	a	b	b	b	-	a	b	a	b	a	a	a	a	a	b	b	a	a	b	b	b	b	a	b	a	b	b	b	a	b
BBMR_16J18*******	b	b	b	b	b	a	a	b	a	a	a	b	b	b	a	a	a	b	b	b	b	b	b	b	a	b	b	b	a	b	b	b	b	b	b	b	b	b	b	b	b	b	b	a	b	b	b	b	b
BBMR_16J19	a	a	b	b	b	a	b	a	b	b	a	a	a	b	b	a	a	b	b	a	b	b	a	b	b	a	b	b	b	b	a	b	a	a	a	b	b	b	b	a	a	b	b	b	a	b	b	a	a
CBBMR_16K24	b	a	b	a	a	a	a	b	a	a	b	a	a	a	a	a	a	b	b	b	a	a	a	a	a	b	a	a	a	b	b	b	b	b	b	b	b	a	a	b	b	a	a	a	a	a	b	b	b
BBMR_16L15	a	a	b	b	a	b	a	b	b	a	b	a	a	b	a	a	a	b	a	b	b	b	a	a	b	a	b	a	b	a	b	b	a	b	b	a	a	a	a	b	b	a	a	a	b	a	a	b	a
CBBMR_16M02	a	b	b	b	b	a	b	b	a	a	a	b	b	b	a	a	a	a	a	a	a	b	a	b	a	b	b	a	a	a	b	a	b	b	b	a	b	b	b	b	b	a	b	a	b	b	b	a	b
CBBMR_16N02****	b	b	a	a	b	a	a	b	b	a	b	b	-	-	b	b	a	b	a	a	b	a	a	a	b	b	b	b	b	b	b	b	a	a	b	a	b	b	a	b	b	a	a	a	b	b	b	b	b
BBMR_16N08	a	b	a	b	a	b	a	a	a	b	b	a	b	b	b	b	b	b	a	b	b	b	a	b	b	a	a	a	a	a	b	b	b	b	b	-	-	b	a	a	a	b	a	-	b	a	b	b	b
BBMR_16N19	b	b	a	b	b	b	a	a	a	a	b	a	a	a	a	b	a	a	b	b	b	b	a	a	b	a	a	a	a	b	b	a	b	b	a	b	b	a	a	b	a	a	a	-	b	a	a	a	a
BBMR_16O21	a	a	a	a	a	b	b	a	a	-	b	a	a	a	a	b	a	a	b	b	b	b	b	a	b	a	a	-	a	a	a	b	b	b	a	b	b	b	b	b	a	a	a	b	b	b	a	b	b
BBMR_16P13	a	b	b	b	b	a	a	b	b	a	b	a	a	b	b	a	a	a	b	b	a	b	a	a	b	a	b	b	a	a	b	a	a	b	a	b	a	b	b	b	b	a	a	b	b	a	a	b	a
BHMR_09A02*	-	b	b	a	b	b	b	b	b	b	b	b	a	b	b	a	a	a	a	b	a	-	-	a	a	b	a	b	a	b	a	b	a	b	b	b	b	b	b	a	b	b	b	b	-	-	b	a	b
BHMR_09B01	a	b	a	a	b	b	b	b	a	a	b	b	a	a	b	b	b	a	b	b	a	a	a	a	a	b	a	b	b	b	a	b	a	b	a	a	b	b	b	a	b	a	b	b	b	a	b	a	b
CHMR_09B06*******	b	b	b	b	b	a	b	b	b	b	a	a	b	b	b	a	b	b	b	b	b	-	b	b	b	b	b	b	b	b	a	b	-	b	b	a	b	b	b	b	b	b	b	b	a	b	b	b	b
BHMR_09B07	a	b	b	a	a	-	b	b	b	b	a	b	a	b	b	a	a	b	a	a	a	a	a	a	a	b	a	b	a	b	b	b	a	b	a	b	b	b	b	b	b	a	b	b	a	a	b	b	b
BHMR_09B21	a	b	a	b	b	a	b	b	a	a	a	a	b	a	a	a	b	b	a	a	b	b	b	b	a	b	a	b	a	a	a	a	a	b	b	a	a	b	b	b	b	a	a	a	b	b	b	b	b
CHMR_09D04	a	b	b	b	b	a	a	b	a	a	b	a	b	b	b	a	a	a	b	b	a	b	a	b	b	a	b	b	a	b	a	a	b	b	a	b	a	a	b	b	a	b	b	b	a	a	b	b	a
CBHMR_09D13	a	b	a	b	a	a	b	a	a	b	a	a	b	a	a	a	a	-	a	b	a	a	a	a	a	b	a	a	a	b	a	-	b	a	b	b	b	b	b	a	b	-	b	b	-	-	b	a	b
CBHMR_09D14	b	a	b	b	b	b	a	b	a	b	a	a	a	a	b	b	a	a	a	a	b	a	b	b	a	b	b	a	a	a	b	a	a	b	b	a	b	a	b	b	a	a	a	b	a	a	b	b	a
BHMR_09D23	b	a	a	a	b	b	a	b	b	b	a	a	b	b	a	b	a	a	b	a	a	a	b	b	a	a	a	b	a	b	b	a	a	a	a	b	b	b	a	a	b	b	b	b	a	a	a	b	a
CBHMR_09F06	a	b	a	b	a	b	a	b	b	b	b	a	a	a	a	a	b	b	b	a	a	b	a	b	b	a	a	a	b	a	b	a	a	a	b	a	b	a	a	b	a	a	a	a	b	a	b	a	a
CBHMR_09F14	a	b	b	a	b	a	a	a	b	a	b	a	b	a	a	a	b	b	b	a	b	a	b	b	b	a	b	b	a	a	b	b	b	a	b	a	b	a	b	a	a	a	b	a	a	b	b	b	a
BHMR_09F17	b	b	b	a	a	b	b	a	b	a	b	b	a	a	a	b	a	b	a	a	a	a	-	b	a	b	b	a	b	b	b	b	b	b	a	a	a	a	a	b	b	a	b	b	-	b	a	a	a
BHMR_09F23	a	a	a	a	a	b	-	b	b	a	b	a	a	a	b	a	a	a	b	b	a	b	a	b	b	a	a	b	b	b	a	b	a	a	b	b	b	a	b	a	a	b	b	b	a	a	b	a	a
BHMR_09F24	b	b	b	b	a	b	a	a	b	b	b	a	a	b	a	a	a	b	a	b	b	b	a	b	b	a	a	a	a	a	b	a	a	a	a	a	a	a	-	a	a	b	b	a	a	a	a	a	a
BHMR_09H02	b	a	a	a	a	a	a	b	a	b	b	a	b	a	a	a	a	b	b	b	a	b	b	a	a	b	a	a	a	b	b	b	b	b	a	b	b	a	a	a	b	b	a	a	b	a	a	b	b
BHMR_09H06	a	b	a	b	b	a	b	b	a	b	a	a	b	a	a	a	a	b	b	b	b	b	a	b	a	b	b	b	b	a	b	a	a	b	a	a	a	a	a	a	b	b	b	a	a	a	a	b	b
BHMR_09H11	a	b	b	b	b	a	b	b	a	b	b	b	b	a	a	a	a	b	a	a	a	b	b	a	b	b	b	a	a	b	a	a	a	a	b	b	a	a	a	b	b	a	b	b	b	b	a	a	b
BHMR_09I02	b	b	b	a	a	b	b	a	b	a	b	b	b	b	a	b	a	b	a	a	a	a	b	a	a	b	b	a	b	a	b	b	b	a	b	a	a	a	b	b	a	a	a	-	b	a	a	a	b
CBHMR_09I05	b	a	b	b	b	b	a	b	a	b	a	a	a	a	b	b	a	a	a	a	b	a	b	b	a	b	b	a	a	a	b	a	a	b	b	a	b	a	b	b	a	a	a	b	a	a	b	b	a
BHMR_09I11	b	a	a	a	a	a	a	b	a	b	b	a	b	a	a	a	a	b	b	b	a	b	b	a	a	b	a	a	a	b	b	b	b	b	a	b	b	a	a	a	b	b	a	a	b	a	a	b	b
BHMR_09J04	a	b	b	a	a	b	b	b	b	b	a	b	a	b	b	a	a	b	a	a	a	a	a	a	a	b	a	b	a	b	b	b	a	b	a	b	b	b	b	b	b	a	b	b	a	a	b	b	b
BHMR_09J10	a	b	b	a	b	a	a	a	b	a	b	a	b	a	a	a	b	b	b	a	b	a	b	b	b	a	b	b	a	a	b	b	b	a	b	a	-	a	b	a	a	a	b	a	a	b	b	b	a
CBHMR_09J13	a	b	b	a	b	a	a	a	b	a	b	a	b	a	a	a	b	b	b	a	b	a	b	b	b	a	b	b	a	a	b	b	b	a	b	a	b	a	b	a	a	a	b	a	a	b	b	b	a
BHMR_09K13	a	b	b	b	b	a	a	b	a	a	b	b	b	b	b	a	b	b	a	b	b	b	b	b	b	b	b	b	a	b	a	a	b	b	a	a	b	a	b	b	a	b	b	a	a	a	b	b	a
BHMR_09K15*******	a	b	b	b	b	b	b	b	b	b	a	b	b	b	b	a	a	b	a	a	a	b	a	b	a	b	b	b	a	b	b	b	b	b	b	b	b	b	b	b	b	a	b	b	b	b	b	b	b
CHMR_09K21	a	b	b	b	b	a	a	b	a	a	a	b	b	-	a	a	a	a	b	a	b	b	-	b	a	b	b	a	a	a	b	a	b	b	b	a	b	b	-	b	b	a	b	a	b	b	b	a	b
BHMR_09L17	b	b	b	a	a	-	a	a	b	b	b	a	a	b	b	a	a	a	a	b	b	b	a	a	b	a	a	a	b	a	a	a	a	a	a	a	a	b	a	a	b	a	a	b	b	a	b	a	a
CBHMR_09M03	b	b	b	b	b	a	b	a	b	b	a	a	a	b	a	b	b	a	a	a	a	a	b	b	a	b	a	b	b	a	b	b	a	b	b	a	a	b	b	b	b	a	a	a	b	a	b	b	a
CBHMR_09M13	a	b	a	b	b	a	a	b	a	a	-	a	b	b	a	a	b	a	a	a	b	b	b	b	a	b	a	b	a	a	a	a	a	b	b	a	a	b	b	b	b	a	b	a	b	b	b	a	b
BHMR_09N23	a	a	b	b	b	a	b	a	b	b	a	a	a	b	b	a	a	b	b	a	b	b	a	b	b	a	b	b	b	b	a	b	a	a	b	b	b	b	b	a	a	b	b	b	a	b	b	a	a
BHMR_09N24	a	b	b	-	b	a	a	a	b	a	b	a	b	a	a	a	b	b	b	a	b	a	b	b	b	a	b	b	a	a	b	b	b	a	b	a	b	a	b	a	a	a	b	a	a	b	b	b	a
BHMR_09O16	b	b	a	a	b	b	b	b	b	b	a	a	a	b	b	b	b	b	b	a	a	a	a	b	b	a	a	b	a	a	a	a	a	a	a	b	b	a	b	a	b	b	b	b	a	a	a	b	a
BHMR_09O17	b	-	a	b	a	a	a	-	b	b	b	a	b	-	a	a	b	b	-	b	a	b	b	a	b	a	a	a	a	a	a	-	a	b	a	a	b	a	a	a	-	b	b	-	-	a	a	a	-
BHMR_09O19	a	b	b	a	a	b	b	b	b	b	a	b	a	b	b	a	a	b	a	a	a	a	a	a	a	b	a	b	a	b	b	b	a	b	a	b	b	b	b	b	b	a	b	b	a	a	b	b	b
BHMR_09O22*	b	a	b	-	a	a	a	b	a	b	b	a	a	a	a	a	a	b	b	b	a	b	b	a	a	b	a	a	a	b	b	b	b	b	a	b	b	a	a	a	b	b	a	a	b	a	a	b	b
BHMR_09O23	a	b	a	a	a	b	a	b	b	a	b	b	a	b	b	a	b	b	b	a	b	a	b	a	b	b	b	a	b	b	b	b	a	a	b	a	b	b	a	b	a	a	a	a	b	b	a	b	b
BHMR_09P06	a	b	a	b	b	a	b	a	b	b	b	b	a	a	b	b	a	a	b	b	a	b	b	b	a	a	b	a	a	b	b	b	b	a	a	a	a	a	b	a	a	b	a	b	b	a	a	b	a
BHMR_09P13	a	a	a	a	a	b	a	b	b	a	b	a	a	a	b	a	a	a	b	b	a	b	a	b	b	a	a	b	b	b	-	b	a	a	b	b	b	a	b	a	a	b	b	b	a	a	b	a	a
BHMR_10A01	a	-	a	-	a	-	a	a	a	b	b	a	b	b	-	-	b	b	a	b	-	b	a	b	b	a	a	a	a	a	b	b	b	a	b	b	b	-	a	a	a	b	a	-	b	a	-	b	b
BHMR_10A17	a	a	a	a	b	b	b	a	b	b	a	b	a	a	a	b	b	b	a	b	b	a	b	b	a	a	a	a	b	a	a	a	a	a	a	a	a	b	b	a	a	a	a	a	a	b	b	b	a
CBHMR_10B06	a	b	a	b	b	a	b	b	a	b	a	a	a	a	a	a	a	b	b	b	b	b	a	b	a	b	b	b	b	a	b	a	a	b	a	a	a	a	a	a	b	b	a	a	b	a	b	b	b
CBHMR_10B07	a	b	a	b	b	b	a	b	b	a	a	b	a	a	b	a	b	b	a	b	b	b	b	b	b	b	b	-	a	b	a	a	b	b	a	a	b	a	b	b	a	a	b	a	-	-	b	a	a
BHMR_10B15	a	b	a	a	a	a	a	b	-	-	a	a	b	b	a	a	a	b	a	b	b	b	b	a	b	b	a	a	b	b	b	a	b	b	a	a	b	a	b	b	b	b	-	a	b	b	a	a	b
BHMR_10B16	a	b	a	a	b	b	b	b	b	a	a	b	b	a	b	b	b	a	b	b	-	a	a	a	a	b	a	b	b	b	a	b	a	b	a	a	a	b	a	a	b	a	b	b	b	a	b	a	-
BHMR_10C02	a	b	a	b	b	a	b	a	b	b	b	b	b	b	b	b	a	a	b	b	a	b	b	b	a	a	b	a	a	b	b	b	b	a	a	a	a	a	b	a	a	b	a	b	b	a	a	b	a
BHMR_10C03	a	b	a	a	b	b	-	b	b	-	b	b	a	a	b	b	b	a	b	b	-	a	a	a	a	b	a	b	b	b	a	b	-	b	a	a	a	b	-	a	b	a	b	b	b	a	b	a	b
BHMR_10C06	b	a	b	b	b	b	a	b	a	b	a	a	a	a	b	b	a	a	a	a	b	a	b	b	a	b	b	a	a	a	b	a	a	b	b	a	b	a	b	b	a	a	a	b	a	a	b	b	a
BHMR_10D07	a	b	a	b	b	b	a	b	a	b	b	b	b	a	b	a	b	b	b	a	a	a	b	a	b	b	-	a	a	b	a	a	a	a	a	b	b	a	a	b	b	a	b	b	a	b	b	a	a
BHMR_10D09	b	a	a	b	a	b	b	a	a	a	a	b	b	a	a	a	a	a	a	b	a	a	b	b	a	b	b	b	b	a	b	b	b	b	b	b	a	a	b	a	b	a	a	a	b	a	b	a	b
CHMR_10D17	a	b	b	b	b	a	a	b	a	a	b	a	b	b	b	a	a	a	b	b	a	b	a	b	b	a	b	b	a	b	a	a	b	b	a	b	a	a	b	b	a	b	b	b	a	a	b	b	a
CBHMR_10E06	a	a	a	b	a	b	a	a	a	a	a	b	b	a	a	a	a	a	a	b	a	b	b	b	a	b	b	b	b	a	b	b	b	b	b	b	a	a	b	a	b	a	a	a	b	a	b	a	b
BHMR_10E17	a	a	b	b	b	a	a	a	b	b	a	a	a	b	b	b	a	b	b	a	b	b	a	b	b	a	b	b	b	b	a	b	a	a	a	b	a	b	b	a	a	b	b	b	a	b	b	a	a
CBHMR_10G18	a	b	b	b	b	a	a	b	a	a	a	b	b	b	a	a	a	a	a	a	b	b	b	b	a	b	a	b	a	a	a	a	a	b	b	a	a	b	b	b	b	a	b	a	b	b	b	a	b
CBHMR_10H11	a	a	a	a	a	b	a	b	b	a	b	a	a	a	b	a	a	a	b	b	a	b	a	b	b	a	a	b	b	b	a	b	a	a	b	b	b	a	b	a	a	b	b	b	a	a	b	a	a
BHMR_10H18	a	b	b	a	a	b	a	b	b	a	b	b	a	b	b	a	b	b	a	a	b	b	a	a	b	a	b	a	b	a	b	b	b	b	b	-	a	b	a	b	-	a	-	a	b	b	-	b	b
CBHMR_10I02	b	b	b	a	a	b	a	a	b	b	b	a	a	b	b	a	a	a	a	b	b	b	a	a	b	a	a	a	b	a	a	a	a	a	a	a	a	b	a	a	b	a	a	b	b	a	b	a	a
BHMR_10I12***	b	b	a	a	b	b	a	b	b	a	b	b	a	a	b	b	b	b	a	a	b	a	a	a	b	b	b	b	b	b	b	b	a	a	b	a	b	b	a	b	b	a	a	a	b	b	a	b	b
BHMR_10I16	b	b	a	a	a	a	a	a	b	a	b	b	a	a	b	b	a	b	a	a	b	a	a	b	a	b	b	b	a	b	b	b	a	a	b	a	a	a	b	a	b	b	b	a	b	b	b	a	a
CBHMR_10J13	b	b	b	a	a	b	a	a	b	b	b	a	a	b	b	a	a	a	a	b	b	b	a	a	b	a	a	a	b	a	a	a	a	a	a	a	a	b	a	a	b	a	a	b	b	a	b	a	a
BHMR_10J19	b	b	b	a	a	b	b	a	b	-	b	b	a	a	a	b	a	b	a	a	a	a	a	a	a	b	b	a	b	a	b	-	b	b	a	a	a	a	a	b	a	a	b	b	a	a	a	a	b
BHMR_10K06	a	a	b	b	a	b	a	a	b	a	a	a	a	b	a	b	a	b	a	b	b	b	a	a	b	a	a	a	b	a	b	b	a	b	b	a	a	a	a	b	b	b	b	b	a	a	a	b	a
BHMR_10K10	a	b	a	b	b	a	b	b	a	a	a	a	b	a	a	a	b	b	a	a	b	b	a	b	a	b	a	b	a	a	a	a	a	b	b	a	a	b	b	b	b	a	a	a	b	b	b	b	b
BHMR_10L08	b	b	a	a	b	b	b	a	b	b	a	b	a	b	a	b	a	b	b	a	a	b	a	b	a	a	a	a	b	b	a	a	a	b	a	b	b	b	a	b	b	a	b	a	a	a	b	b	a
BHMR_10L20	b	b	b	a	a	b	b	b	a	a	b	a	a	a	a	b	b	a	b	b	a	a	b	a	a	b	a	-	b	a	a	b	a	a	b	b	-	b	a	b	a	b	a	a	-	b	a	b	b
BHMR_10M18	b	a	a	b	b	a	b	b	b	a	b	b	b	b	a	b	a	a	a	b	a	a	b	a	a	b	a	a	b	a	b	-	a	b	b	a	b	a	b	a	b	a	b	b	a	b	b	a	b
BHMR_10M22	b	a	a	b	b	a	a	b	a	a	b	b	a	a	b	b	a	b	a	b	b	a	a	b	a	b	b	b	a	a	a	b	a	a	b	a	a	a	b	a	b	b	b	a	b	b	a	a	a
BHMR_10M24	a	b	b	a	b	a	a	a	b	a	b	a	b	a	a	a	b	b	b	a	b	a	b	b	b	a	b	b	a	a	b	b	b	a	b	a	b	a	b	a	a	a	b	a	a	b	b	b	a
BHMR_10N05	b	b	b	a	a	b	b	a	b	a	a	b	b	b	a	b	b	a	b	a	a	b	b	b	a	b	a	a	b	a	b	b	b	a	b	a	a	a	b	a	a	b	a	b	b	a	a	a	a
BHMR_10N14	b	a	a	a	b	b	a	b	b	b	a	a	b	b	a	b	a	a	b	a	a	a	b	b	a	a	a	b	a	b	a	a	a	a	a	b	b	a	b	a	b	b	b	b	a	a	b	b	a
BHMR_10N16	a	b	a	a	b	b	b	b	b	a	b	b	b	a	b	b	b	a	b	b	a	a	a	-	a	b	a	b	b	-	a	b	a	b	a	a	a	b	a	a	b	a	b	b	b	a	b	a	b
BHMR_10N23	a	b	a	b	b	a	b	a	b	b	b	b	b	b	b	b	a	a	b	b	a	b	b	b	a	a	b	a	a	b	b	b	b	a	a	a	a	a	b	a	a	b	a	b	b	a	a	b	a
BHMR_10O07	b	b	a	b	b	a	a	a	b	a	b	a	b	a	b	a	b	b	b	a	b	a	b	b	b	a	b	b	a	a	b	b	b	a	b	a	b	a	b	a	a	b	b	a	a	a	b	b	b
BHMR_10O13	a	a	b	b	b	a	a	a	b	b	a	a	a	b	b	b	a	b	b	a	b	b	a	b	b	a	b	b	b	b	a	b	a	a	a	b	a	b	b	a	a	b	b	b	a	b	b	a	a
BHMR_10P01	a	b	a	b	b	a	b	b	a	b	a	a	b	a	a	a	a	b	b	b	b	b	a	b	a	b	b	b	b	a	b	a	a	b	a	a	a	a	a	a	b	b	b	a	a	a	a	b	b
CBHMR_10P03	a	b	a	a	b	b	b	b	b	a	b	b	b	a	b	b	b	a	b	b	a	a	a	a	a	b	a	b	b	b	a	b	a	b	a	a	a	b	a	a	b	a	b	b	b	a	b	a	b
BHMR_11A10	a	b	a	a	b	b	b	b	b	a	b	b	b	a	b	b	b	-	b	b	a	a	a	a	a	b	a	b	b	b	a	b	a	b	a	a	a	b	a	a	b	a	b	b	b	a	b	a	b
BHMR_11D10	b	b	a	-	a	a	a	a	b	a	b	b	a	a	b	b	a	b	a	a	b	a	a	b	a	b	b	b	a	b	b	b	a	a	b	a	a	a	b	a	b	b	b	a	b	b	b	a	a
BHMR_11D14	b	b	b	b	a	b	a	a	b	b	b	a	a	b	b	a	a	-	a	b	b	b	a	b	b	a	a	a	b	a	a	a	a	a	a	a	a	b	a	a	b	a	a	b	b	a	b	a	a
BHMR_11D22	b	b	a	b	b	a	a	a	b	a	b	a	b	a	b	a	b	b	b	a	b	a	b	b	b	a	b	b	a	a	b	b	b	a	b	a	b	a	-	a	a	b	b	a	a	a	b	b	b
CBHMR_11E02	b	b	b	a	a	a	a	b	a	b	a	b	b	b	b	a	b	b	b	b	a	a	b	a	b	a	a	b	b	b	b	a	a	b	a	a	a	b	b	b	a	b	b	b	a	b	b	a	a
BHMR_11E03	a	b	b	a	-	b	-	b	a	b	b	b	a	b	b	b	a	a	a	b	a	a	a	a	a	b	a	b	a	b	a	b	a	b	b	b	b	b	b	a	b	-	b	b	a	a	b	a	b
CBHMR_11E19	b	a	a	b	b	a	b	b	b	a	b	b	b	b	a	b	a	a	b	b	a	a	b	a	a	b	a	a	b	a	b	b	a	b	b	a	b	a	b	a	b	a	b	b	a	b	b	a	b
CBHMR_11E22	a	a	a	a	a	b	a	b	b	a	b	a	a	a	b	a	a	a	b	b	a	b	a	b	b	a	a	b	b	b	a	b	a	a	b	b	b	a	b	a	a	b	b	b	a	a	b	a	a
CBHMR_11F16	b	a	a	b	b	a	b	b	b	a	b	b	b	b	a	b	a	a	b	b	a	a	b	a	a	b	a	a	b	-	b	b	a	b	b	a	b	a	b	a	b	a	b	b	a	b	b	a	b
BHMR_11G23**	a	b	b	b	b	a	a	b	-	-	b	-	b	b	b	a	b	a	b	b	a	b	a	b	b	b	b	b	a	b	a	a	b	b	a	b	b	a	a	b	a	b	b	b	a	a	b	b	a
BHMR_11H17	a	a	a	a	b	-	a	b	a	b	a	a	b	b	a	b	b	a	b	a	a	a	b	b	a	a	a	b	a	b	b	a	a	a	a	b	b	b	a	a	b	b	b	b	a	a	a	b	a
CBHMR_11H24	b	b	b	a	a	a	a	b	a	b	a	b	b	b	b	a	b	b	b	b	a	a	b	a	b	a	a	b	b	b	b	a	a	b	a	a	a	b	b	b	a	b	b	b	a	b	b	a	a
CBHMR_11I11	b	a	a	a	b	b	a	b	b	b	a	a	b	b	a	b	a	a	b	a	a	a	b	b	a	a	a	b	a	b	a	a	a	a	a	b	b	a	b	a	b	b	b	b	a	a	a	b	a
BHMR_11I12	a	b	a	b	a	a	b	a	a	a	b	a	b	b	b	b	b	b	a	b	b	b	b	a	b	a	a	b	a	a	b	b	a	b	a	b	a	b	a	b	b	a	a	b	a	a	b	b	b
CBHMR_11I20	b	a	a	b	b	a	b	b	b	a	b	b	b	b	a	b	a	a	a	b	a	a	a	a	a	b	a	a	b	a	b	b	a	b	b	a	b	a	b	a	b	a	b	b	a	b	b	a	b
CBHMR_11I23*	a	b	a	a	b	b	b	b	a	a	b	b	a	b	b	b	a	a	b	b	a	-	a	a	a	b	-	b	b	b	a	b	a	b	b	a	b	b	b	a	b	a	b	b	a	a	b	a	b
BHMR_11J05	b	b	b	a	a	b	b	b	b	b	a	b	a	b	b	a	a	b	b	a	a	a	a	a	a	b	a	b	a	b	b	b	a	b	a	b	b	b	b	b	b	a	b	b	a	a	b	b	b
BHMR_11J06	b	b	b	a	a	b	b	a	b	a	b	b	a	a	a	b	a	b	a	a	a	a	a	a	a	b	b	a	b	a	b	b	b	b	a	a	a	a	a	b	a	a	b	b	a	-	a	a	b
BHMR_11J12	a	b	a	a	b	b	b	b	a	a	b	b	a	a	b	b	b	a	b	b	a	a	a	a	a	b	a	b	b	b	a	b	a	b	a	a	b	b	b	a	b	a	b	b	b	a	b	a	b
BHMR_11J20	b	b	a	-	b	b	-	b	b	-	a	a	a	b	b	b	b	b	b	a	a	a	-	b	b	a	a	b	a	a	a	a	a	a	a	b	b	a	b	a	b	b	b	b	a	a	a	b	a
BHMR_11J23***	a	b	-	b	b	a	-	b	a	a	b	a	b	b	b	a	a	a	b	b	a	b	a	b	b	a	b	b	a	a	b	a	a	b	a	b	a	a	b	b	b	a	a	b	b	a	b	b	a
BHMR_11K05	a	-	b	b	b	a	b	a	b	b	a	a	a	b	b	a	-	b	b	a	b	b	a	b	b	-	b	b	-	b	a	b	a	a	a	b	b	b	b	a	a	b	b	b	a	b	b	a	a
BHMR_11K19	b	a	b	b	b	b	a	a	a	a	a	a	b	b	a	b	b	a	b	b	b	b	a	b	b	b	a	a	a	b	b	a	b	a	a	b	b	b	a	a	b	a	a	b	b	b	a	a	a
BHMR_11K22	a	-	-	b	a	a	b	a	a	b	a	a	b	a	a	a	-	a	a	b	a	a	a	a	-	-	a	a	a	b	a	a	b	a	b	b	b	b	b	a	b	b	b	b	a	b	b	a	b
BHMR_11K23	b	b	b	b	b	a	b	b	b	b	a	b	b	b	a	b	a	a	a	a	a	a	b	b	a	b	b	b	b	a	b	b	a	b	b	a	a	b	b	b	b	a	a	a	b	a	b	b	a
BHMR_11M23	b	a	a	b	b	a	b	b	b	a	b	b	b	b	a	b	a	a	a	b	a	a	b	a	a	b	a	a	b	a	b	b	a	b	b	a	b	a	b	a	b	a	b	b	a	b	b	a	b
BHMR_11N07	b	b	b	a	b	a	a	a	b	a	b	a	b	a	b	a	b	b	b	a	b	a	b	b	b	a	b	b	a	a	b	b	b	a	b	a	b	a	b	a	a	b	b	a	a	b	b	b	a
BHMR_11N20	a	a	a	a	b	b	a	b	a	b	b	a	b	b	a	b	b	a	b	a	a	a	-	b	a	b	a	b	a	b	b	a	a	a	a	b	b	a	a	a	b	b	b	b	a	a	a	a	a
BHMR_11O20	a	a	a	a	b	b	a	b	a	b	b	a	-	b	a	b	b	a	b	a	a	a	b	b	a	b	a	b	a	-	b	a	a	a	a	b	b	-	a	a	b	b	b	b	a	a	a	a	a
BHMR_11P07	b	a	b	b	b	b	a	a	-	a	a	a	b	b	a	b	b	a	b	b	b	b	a	b	b	b	a	a	a	b	b	a	b	a	a	b	b	b	a	a	b	a	a	b	-	b	-	a	a
BHMR_12A06	a	a	a	b	a	a	b	a	a	b	a	a	b	-	a	a	a	a	a	b	a	a	a	a	a	b	a	a	a	b	a	a	b	a	b	b	b	b	b	a	b	b	b	b	a	b	b	a	b
BHMR_12A11	b	b	a	a	a	b	a	a	b	a	a	a	a	b	b	b	b	a	a	b	a	b	b	b	a	b	b	a	a	a	b	b	b	b	a	a	b	b	a	b	b	a	a	a	b	b	a	a	b
BHMR_12A12	a	-	-	a	-	b	-	b	b	a	b	b	-	a	b	b	b	-	b	b	a	a	a	a	a	-	a	b	b	-	a	-	a	b	a	a	a	b	a	a	b	a	b	b	b	a	b	a	b
BHMR_12A18	a	a	a	b	a	b	a	b	b	a	b	a	a	a	b	b	b	a	b	b	a	b	a	a	b	a	a	b	b	b	b	b	b	a	b	b	b	b	b	a	a	b	b	b	a	a	b	a	a
BHMR_12A20	a	b	a	a	b	b	a	b	a	b	b	a	b	b	b	b	b	a	b	a	a	a	b	b	a	b	a	b	a	a	b	a	a	a	a	b	b	a	a	a	a	b	b	b	a	a	a	a	a
CBHMR_12B09	a	b	a	b	b	a	a	b	a	a	a	a	b	b	a	a	b	a	a	a	b	b	b	b	a	b	a	b	a	a	a	a	a	b	b	a	a	b	b	b	b	a	a	a	b	b	b	b	b
BHMR_12B10*******	b	b	b	b	b	a	b	b	b	b	a	a	b	b	b	a	b	b	-	b	b	-	b	b	b	b	b	b	b	b	a	b	-	b	b	a	b	b	b	b	b	b	b	-	a	b	b	b	b
BHMR_12B16	a	a	a	b	b	a	-	b	a	b	a	a	a	a	a	a	a	b	a	b	b	b	b	b	a	-	b	b	a	a	b	a	a	b	a	a	b	a	b	b	b	b	b	a	a	a	a	b	b
BHMR_12C09	a	b	a	b	b	a	b	b	a	b	a	a	a	a	a	a	a	b	b	b	b	b	a	b	a	b	b	b	b	a	b	a	a	b	a	a	a	a	a	a	b	-	a	a	b	a	b	b	b
BHMR_12C19	a	b	a	a	b	b	b	b	b	a	b	b	a	a	b	b	b	a	b	b	a	a	a	a	a	b	a	b	b	b	a	b	a	b	a	a	a	b	a	a	b	a	b	b	b	a	b	a	b
BHMR_12D07	a	a	a	a	a	b	a	b	b	a	b	-	a	a	b	a	a	a	b	b	a	b	a	b	b	a	a	b	b	b	a	b	a	a	b	b	b	a	b	a	a	b	b	b	a	a	b	a	a
CBHMR_12E16	a	b	b	a	a	b	a	b	b	a	b	b	b	b	b	a	b	b	b	a	b	a	a	a	b	a	b	a	b	a	b	b	b	a	b	a	b	b	a	b	a	a	a	a	b	b	a	b	b
BHMR_12F08*	a	b	a	-	-	b	a	b	b	-	b	b	a	b	b	a	b	b	b	a	b	a	b	a	b	b	b	a	b	b	b	b	a	a	b	a	b	b	a	b	a	a	a	a	b	b	a	b	b
BHMR_12F10	b	b	b	b	a	b	a	a	b	b	b	a	a	b	b	a	a	b	a	b	b	b	a	b	b	a	a	a	b	a	b	a	a	a	a	a	a	b	a	a	b	a	b	b	a	a	b	a	a
BHMR_12F17	a	b	-	b	a	b	a	a	a	b	b	a	-	b	b	b	b	b	a	b	b	b	a	b	b	a	a	-	-	a	b	b	-	-	-	b	b	b	-	a	a	b	a	b	b	a	b	b	b
CHMR_12F23	a	a	b	b	b	a	b	a	b	b	a	a	a	b	b	a	a	b	b	a	b	b	a	b	b	a	b	b	b	b	a	b	a	a	a	b	b	b	b	a	a	b	b	b	a	b	b	a	a
BHMR_12G09	b	b	a	a	b	a	a	a	b	b	b	a	b	a	b	a	b	b	a	a	b	b	b	b	b	a	b	b	a	a	b	b	b	b	b	a	b	a	b	a	a	b	a	b	b	a	a	b	b
BHMR_12G12*	a	b	b	b	b	a	a	b	a	a	b	a	b	b	b	a	b	a	b	b	a	b	a	b	b	b	b	b	a	b	a	a	b	b	a	b	b	a	a	b	a	-	b	b	a	a	b	b	a
BHMR_12G15	b	a	a	b	b	b	a	a	a	a	b	a	b	b	a	b	a	a	b	b	b	b	a	b	b	b	a	a	a	b	b	a	b	b	a	b	b	b	a	b	b	a	a	b	b	b	a	a	a
CBHMR_12H11	a	b	b	b	b	a	a	b	b	a	b	a	a	b	b	a	a	a	a	b	a	b	a	a	b	a	b	b	a	a	b	a	a	b	b	a	a	b	b	a	b	b	a	b	b	b	a	b	a
BHMR_12I14	a	b	a	b	b	a	b	a	b	b	b	b	a	a	a	b	a	a	b	b	a	b	a	b	a	a	b	a	a	b	b	b	b	a	a	a	a	a	b	a	a	b	a	a	b	a	a	b	a
BHMR_12J05	a	b	b	a	a	b	a	b	b	a	b	b	b	b	b	a	b	b	b	a	b	a	a	a	b	a	b	a	b	a	b	b	b	a	b	a	a	b	a	b	a	a	a	a	b	b	a	b	b
BHMR_12J06	a	b	a	b	a	b	a	a	a	b	b	a	a	b	b	b	b	b	a	b	b	b	a	b	b	a	a	a	a	a	b	b	b	a	b	b	b	b	b	a	a	b	a	b	b	a	b	b	b
BHMR_12J11	a	a	b	b	b	a	a	a	b	b	a	a	a	b	b	a	a	b	b	a	b	b	a	b	b	a	b	b	b	b	a	b	a	a	a	b	a	b	b	a	a	b	b	b	a	b	b	a	a
CHMR_12J15*******	b	b	b	b	b	a	b	b	b	b	a	a	b	b	b	a	b	b	b	b	b	b	b	b	b	b	b	b	b	b	a	b	b	b	b	a	b	b	b	b	b	b	b	b	a	b	b	b	b
BHMR_12J22	b	b	b	a	a	b	b	a	b	a	a	b	b	-	b	b	b	a	b	b	a	b	b	b	-	a	a	a	b	a	b	b	b	a	a	a	a	a	b	a	a	b	a	b	b	-	a	a	a
BHMR_12K02	b	b	b	a	a	b	a	a	b	b	b	a	a	b	b	a	a	-	a	b	b	b	b	a	b	a	a	a	b	a	a	a	a	a	a	a	a	b	a	a	b	a	a	b	b	a	b	a	a
BHMR_12K11	a	b	a	b	a	b	a	a	a	b	b	a	b	b	b	b	-	b	a	b	b	b	a	b	b	a	a	-	a	-	b	b	b	a	b	b	b	b	a	a	a	b	a	b	-	-	b	b	b
BHMR_12K20	b	-	-	a	a	a	a	b	a	a	a	a	-	b	a	a	a	b	a	b	b	b	b	a	a	b	a	a	-	-	b	b	b	b	a	b	b	-	-	a	b	b	a	a	b	a	a	b	b
CBHMR_12K23	a	b	a	a	b	b	b	b	a	a	b	b	a	b	b	b	a	a	b	b	a	a	a	a	a	b	a	b	b	b	a	b	a	b	b	a	b	b	b	a	b	a	b	b	a	a	b	a	b
BHMR_12L04	a	b	a	b	b	-	b	a	b	b	b	b	b	b	b	b	a	a	b	b	a	b	b	b	a	a	b	a	a	b	b	b	b	a	a	a	a	a	b	a	a	b	a	b	b	a	a	b	a
CBHMR_12L06	b	a	a	a	b	b	a	a	a	b	b	a	b	a	b	a	b	a	a	b	b	b	b	a	b	a	b	b	a	a	a	b	b	b	b	a	b	a	b	b	a	a	a	b	b	a	a	b	b
BHMR_12L14*	b	b	a	a	a	b	a	b	b	a	b	b	a	b	b	a	b	b	a	a	b	a	b	a	b	b	b	a	b	b	b	b	a	a	b	a	b	b	a	b	a	a	a	a	b	b	a	b	b
CHMR_12L22	b	b	a	a	b	b	b	b	b	b	a	a	a	b	b	b	b	b	b	a	a	a	a	b	b	a	a	b	a	a	a	a	a	a	a	b	b	a	b	a	b	b	-	b	a	a	a	b	a
CBHMR_12M18	a	a	a	a	a	b	a	b	b	a	b	a	a	a	b	a	a	a	b	b	a	b	a	b	b	a	a	b	b	b	a	b	a	a	b	b	b	a	b	a	a	b	b	b	a	a	b	a	a
BHMR_12N03	a	b	a	b	b	b	a	b	a	b	b	b	b	a	b	a	b	b	b	a	a	a	b	a	b	a	a	a	a	b	a	a	a	a	a	b	b	a	a	b	b	a	b	b	a	b	b	a	a
BHMR_12N07	a	a	b	b	b	a	b	a	b	b	a	a	a	b	b	a	a	b	b	a	b	b	a	b	b	a	b	b	b	b	a	b	a	a	a	b	b	b	b	a	a	b	b	b	a	b	b	a	a
BHMR_12N12***	a	b	-	b	b	a	a	b	a	a	b	a	b	b	b	a	a	a	b	b	a	b	a	b	b	a	b	b	a	a	b	a	a	b	a	b	a	b	b	b	b	a	a	b	b	a	b	b	a
BHMR_12N16	b	-	-	a	a	b	-	a	b	a	a	a	-	b	b	b	b	a	a	b	a	a	b	b	a	-	b	a	b	-	b	-	a	b	a	a	b	b	a	b	b	a	a	a	b	b	a	-	b
CBHMR_12O06	b	a	a	b	b	a	b	b	b	a	b	b	b	b	a	b	a	a	b	b	a	a	b	a	a	b	a	a	b	a	b	b	a	b	b	a	b	a	b	a	b	a	b	b	a	b	b	a	b
CBHMR_12O07	a	b	b	a	b	a	b	a	b	b	b	b	b	b	b	b	a	a	a	b	a	b	b	b	a	a	b	a	a	-	b	b	b	a	a	a	a	a	b	a	a	b	a	b	b	a	a	b	a
BHMR_12O10*	a	a	a	b	a	a	a	a	a	b	a	a	b	-	a	a	a	a	a	b	a	a	a	a	a	b	a	a	-	b	a	a	b	a	b	b	a	b	b	a	b	b	b	b	b	b	b	a	b
CBHMR_12O11	b	a	a	a	b	b	a	b	b	b	a	a	b	b	a	b	a	-	b	a	a	a	b	b	a	a	a	b	a	b	b	a	a	a	a	b	b	b	a	a	b	b	b	b	a	a	a	b	a
BHMR_12O14	a	a	b	b	b	a	b	a	b	b	a	a	a	b	b	a	a	b	b	a	b	b	a	b	b	a	b	b	b	b	a	b	a	a	a	b	b	b	b	a	a	b	b	b	a	b	b	a	a
CBHMR_12P05	a	b	a	a	b	b	b	b	b	a	a	b	b	a	b	b	b	a	b	b	a	a	a	a	a	b	a	b	b	b	a	b	a	b	a	a	a	b	a	a	b	a	b	b	b	a	b	a	b
BHMR_12P06	b	a	a	b	b	a	b	b	b	a	b	b	b	b	a	b	a	a	a	b	a	a	b	a	a	b	a	a	b	a	b	b	a	b	b	a	b	a	b	a	b	a	b	b	a	b	b	a	b
BHMR_12P11*	a	a	a	b	a	a	b	a	a	b	a	a	b	a	a	a	a	a	a	b	a	a	a	a	a	b	a	a	a	b	a	a	b	a	b	b	b	b	b	a	b	b	b	b	a	b	b	a	b
BHMR_12P12	b	b	b	a	a	b	b	a	b	a	a	b	b	b	a	b	b	a	b	a	a	b	b	b	a	b	a	a	b	a	b	b	b	a	b	a	a	a	b	a	a	b	a	b	b	a	a	a	a
CBHMR_12P18	b	a	a	b	b	a	b	b	b	a	b	b	b	b	a	b	a	a	b	b	a	a	b	a	a	b	a	a	b	a	b	b	a	b	b	a	b	a	b	a	b	a	b	b	a	b	b	a	b
BHMR_12P22	a	b	b	b	b	a	b	b	a	a	a	a	b	a	a	a	b	b	a	a	b	b	a	b	a	a	a	b	a	a	a	a	a	b	b	a	a	b	b	b	b	a	a	a	b	b	b	b	b
BHMR_13A19	a	b	a	b	a	b	a	a	a	b	b	a	a	b	b	b	b	b	a	b	b	b	a	b	b	a	a	a	a	a	b	b	b	a	b	b	b	b	b	a	a	b	a	b	b	a	b	b	b
BHMR_13A23	a	b	b	a	a	b	b	b	b	b	b	b	a	b	b	a	a	a	a	b	a	a	a	a	a	b	a	b	a	b	a	b	a	b	a	b	b	b	b	a	b	b	b	b	a	a	b	a	b
BHMR_13B03	b	b	b	b	b	b	a	b	a	b	a	b	a	a	b	b	a	a	a	a	b	a	b	b	a	b	b	a	a	a	a	b	a	b	b	a	b	a	b	b	a	a	a	b	a	a	b	b	a
BHMR_13B05	a	b	a	a	-	a	a	b	a	a	a	a	b	-	a	a	b	b	a	a	b	b	b	b	a	b	a	b	a	a	a	a	a	b	b	a	a	b	b	b	b	a	a	a	b	b	b	b	b
BHMR_13B06	a	b	b	a	b	a	a	a	b	a	b	a	b	a	a	a	b	b	b	a	b	a	b	b	b	a	b	b	a	a	b	b	b	a	b	a	b	a	b	a	a	a	b	a	a	b	b	b	a
BHMR_13B10	a	b	b	b	b	a	a	b	a	a	-	b	b	b	a	a	-	a	a	a	b	b	b	b	a	-	a	b	a	a	a	a	a	b	b	a	a	b	b	b	b	a	b	-	b	b	b	a	b
BHMR_13B19	a	b	a	a	b	b	b	b	b	a	a	b	b	a	b	b	b	a	b	b	a	a	a	a	a	b	a	b	b	-	a	-	a	b	a	a	a	b	a	a	b	a	b	b	b	a	b	a	b
BHMR_13B24	b	a	b	b	b	b	b	b	a	b	a	a	a	a	b	b	a	a	a	a	b	a	b	b	a	b	b	a	a	a	b	a	a	b	b	a	b	a	b	b	a	a	a	b	a	a	b	b	a
BHMR_13C01	b	b	a	a	a	a	a	a	b	a	b	b	a	a	b	b	a	b	a	a	b	a	a	b	a	b	b	b	a	b	b	b	a	a	b	a	a	a	b	a	b	b	b	a	-	-	b	a	a
CBHMR_13C17	a	b	a	a	a	b	a	b	b	-	b	b	a	b	b	a	b	b	b	a	b	a	b	a	b	b	b	a	b	b	b	b	a	a	b	a	b	b	a	b	a	a	a	a	b	b	a	b	b
CBHMR_13C20	a	a	a	a	a	b	a	b	b	a	b	a	a	a	b	a	a	a	b	b	a	b	a	b	b	a	a	b	b	b	a	b	a	a	b	b	b	a	b	a	a	b	b	b	a	a	b	a	a
CHMR_13D06*******	b	b	b	b	b	a	b	b	b	b	a	a	b	b	b	a	b	b	b	b	b	b	b	b	b	b	b	b	b	b	a	b	b	b	b	a	b	b	b	b	b	b	b	b	a	b	b	b	b
CBHMR_13D12	b	b	a	a	a	b	b	a	b	a	b	a	a	a	a	b	a	b	a	a	a	a	a	b	a	b	a	a	b	b	b	b	b	b	a	b	a	a	a	b	b	a	b	b	a	b	a	a	a
BHMR_13D20	a	b	a	a	a	b	a	b	b	a	b	b	a	b	b	a	b	b	b	a	b	a	b	a	b	b	b	a	b	b	b	b	a	a	b	a	b	b	a	b	a	a	a	a	b	b	a	b	b
BHMR_13E11	b	b	a	a	-	a	b	b	b	b	a	a	a	b	b	a	b	b	b	a	a	a	a	b	b	a	a	b	b	a	a	a	a	a	b	b	b	a	b	a	b	b	a	a	b	a	b	b	a
BHMR_13E14	a	b	b	a	b	a	a	a	b	a	b	a	b	-	a	a	b	b	b	a	b	a	b	b	b	a	b	b	a	a	b	b	b	a	b	-	b	a	b	a	-	a	b	a	a	b	b	b	-
BHMR_13E22	b	b	b	a	a	b	a	a	b	b	b	a	a	b	b	a	a	a	a	b	b	b	a	a	b	a	a	a	b	a	a	a	a	a	a	a	a	b	a	a	b	a	a	b	b	a	b	a	a
BHMR_13F05	b	b	b	-	a	b	b	a	b	a	a	b	b	b	a	b	b	a	b	a	a	b	b	a	a	b	b	a	b	a	b	b	b	a	b	a	a	a	b	a	a	b	a	b	b	a	a	a	b
CBHMR_13F09	b	b	b	a	a	b	b	a	b	a	a	b	b	b	a	b	b	a	b	a	a	b	b	a	a	b	b	a	b	a	b	b	b	a	b	a	a	a	b	a	a	b	a	b	b	a	a	a	b
BHMR_13F11	a	a	b	b	b	a	b	a	b	b	a	a	a	b	b	a	a	b	b	a	b	b	a	b	b	a	b	b	b	b	a	b	a	a	a	b	b	b	b	a	a	b	b	b	a	b	b	a	a
CBHMR_13F13*	a	a	a	b	a	a	b	a	a	b	a	a	b	a	a	a	a	a	a	b	a	a	a	a	a	b	a	a	a	b	a	a	b	a	b	b	b	b	b	a	b	b	b	b	a	b	b	a	b
BHMR_13F18*	a	a	a	b	a	a	b	a	a	b	a	a	b	a	a	a	a	a	a	b	a	a	a	a	a	b	a	a	a	b	a	a	b	a	b	b	b	b	b	a	b	b	b	b	a	b	b	a	b
BHMR_13F22	a	b	b	b	b	a	a	b	a	a	b	b	b	b	b	a	b	b	a	b	b	b	b	b	b	b	b	b	a	b	a	a	b	b	a	a	b	a	b	b	a	b	b	a	a	a	b	b	a
BHMR_13F23	b	b	a	b	b	a	a	a	b	a	b	a	b	a	b	a	b	b	b	a	b	a	b	b	b	a	b	b	a	a	b	b	b	a	b	a	b	a	b	a	a	b	b	a	a	a	b	b	b
BHMR_13G13	a	b	a	a	b	b	a	b	a	b	b	a	b	b	b	b	b	a	b	a	a	a	b	b	a	b	a	b	a	a	b	a	a	a	a	b	b	a	a	a	a	b	b	b	a	a	a	a	a
CBHMR_13G21	a	b	a	a	b	b	b	b	b	a	b	b	a	a	b	b	b	a	b	b	a	a	-	a	a	b	a	b	b	b	a	b	a	b	a	a	-	b	a	a	b	a	b	b	b	a	b	a	b
BHMR_13H09	a	b	a	b	b	a	a	b	a	a	a	b	b	b	a	a	a	a	a	a	b	b	b	b	a	b	a	b	a	a	a	a	a	b	b	a	a	b	b	b	b	a	b	a	b	b	b	a	b
BHMR_13H15	a	a	a	b	a	b	a	b	a	a	b	a	b	b	b	b	b	a	a	b	a	b	b	a	b	a	a	b	a	b	b	b	b	a	a	b	b	b	b	a	b	b	b	b	a	a	b	a	a
BHMR_13I14	b	b	b	a	a	b	b	a	b	a	b	b	b	b	a	b	b	a	b	a	a	b	b	a	a	b	b	a	b	a	b	b	b	a	b	a	a	a	b	a	a	b	a	b	b	a	a	a	b
BHMR_13J02	a	b	b	a	a	b	b	b	b	b	b	b	a	b	b	a	a	a	b	b	a	a	a	a	a	b	a	b	a	b	a	b	a	b	a	b	b	b	b	a	b	b	b	b	a	a	b	a	b
BHMR_13J05	a	b	b	b	b	a	b	b	a	a	a	b	b	b	a	a	a	a	a	a	a	b	a	b	a	b	b	a	a	a	b	a	b	b	b	a	b	b	b	b	b	a	b	a	b	b	b	a	b
CBHMR_13J08	a	b	a	a	b	a	a	b	a	a	a	a	b	b	a	a	b	b	a	a	b	b	b	b	a	b	a	b	a	a	a	a	a	b	b	a	a	b	b	b	b	a	a	a	b	b	b	b	b
BHMR_13J14	b	a	a	b	a	b	b	a	a	a	a	b	b	a	a	a	a	a	a	b	a	a	b	b	a	b	b	b	b	a	b	b	b	b	b	b	a	a	b	a	b	a	a	a	b	a	b	a	b
BHMR_13J18	a	b	a	b	a	b	a	a	a	b	b	a	a	b	b	b	b	b	a	b	b	b	a	b	b	a	a	a	a	a	b	b	b	a	b	b	b	b	b	a	a	b	a	b	b	a	b	b	b
BHMR_13J24	b	b	b	b	b	a	b	a	b	b	a	a	a	b	a	b	b	a	a	a	a	a	b	b	a	b	a	b	b	a	b	b	a	b	b	a	a	b	b	b	b	a	a	a	b	a	b	b	a
CBHMR_13K14	b	b	b	b	b	a	b	a	b	b	a	b	b	b	a	b	b	a	a	a	a	a	b	b	a	b	a	b	b	a	b	b	a	b	b	a	a	b	b	b	b	a	a	a	b	a	b	b	a
BHMR_13L20**	a	b	a	b	a	b	a	a	a	b	b	a	a	b	b	b	b	b	a	b	b	b	a	b	b	a	a	a	a	a	b	b	b	a	b	b	b	b	b	a	b	b	a	b	b	a	b	b	b
BHMR_13L23	a	b	a	b	a	b	a	a	a	b	b	a	b	b	b	b	b	b	a	b	b	b	a	b	b	a	a	a	a	a	b	b	b	a	b	b	b	b	a	a	a	b	a	b	b	a	b	b	b
BHMR_13L24	a	a	a	a	b	b	b	a	b	b	a	b	a	a	a	b	b	b	a	b	b	a	b	b	a	a	a	a	b	a	a	a	a	a	a	a	a	b	b	a	a	a	a	a	a	b	b	b	a
CBHMR_13M05	a	a	b	b	a	b	a	b	b	a	b	b	a	b	a	a	b	b	a	a	b	b	a	a	b	a	b	a	b	a	b	b	b	b	b	a	a	a	a	b	b	a	a	a	b	b	a	b	a
CBHMR_13M12	a	b	b	a	b	b	b	b	b	b	b	b	a	b	b	a	a	a	a	b	a	a	a	a	a	b	a	b	a	b	a	b	a	b	b	b	b	b	b	a	b	b	b	b	a	a	b	a	b
BHMR_13M20	a	b	b	b	b	a	a	b	a	a	a	b	b	b	a	a	a	a	b	a	b	b	b	b	a	b	a	b	a	a	a	a	b	b	b	a	b	b	b	b	b	a	b	a	b	b	b	a	b
BHMR_13M22	a	b	a	b	a	b	a	a	a	b	b	a	b	b	b	b	b	b	a	b	b	b	a	b	b	a	a	a	a	a	b	b	b	b	b	b	b	b	a	a	a	b	a	b	b	a	b	b	b
CBHMR_13N15	a	b	a	b	b	a	b	b	a	b	a	a	a	a	a	a	a	b	b	b	b	b	a	b	a	b	b	b	b	a	b	a	a	b	a	a	a	a	a	a	b	b	a	a	b	a	b	b	b
BHMR_13N18**	b	a	a	b	a	a	a	a	b	a	b	a	b	a	a	a	b	b	a	a	a	b	a	a	b	a	a	a	a	a	a	a	a	b	a	a	b	a	a	a	a	b	b	a	a	a	a	a	a
BHMR_13N21	b	b	a	b	b	a	a	a	b	a	b	a	b	a	b	a	b	b	b	a	b	a	b	b	b	a	b	b	a	a	b	b	b	a	b	a	b	a	b	a	a	b	b	a	a	a	b	b	b
CHMR_13O04	b	b	a	b	a	a	b	a	a	-	a	a	a	b	a	a	a	a	b	b	b	b	a	b	b	a	b	a	b	b	a	b	b	b	b	a	b	b	b	b	b	a	-	b	a	b	a	a	a
BHMR_13O07	a	b	a	a	b	b	b	b	b	a	b	b	b	a	b	b	b	a	b	b	a	a	a	a	a	b	a	b	b	-	a	b	a	b	a	a	a	b	a	a	b	a	b	b	b	a	b	a	b
CHMR_13O19	a	a	a	-	b	b	a	a	b	b	-	a	a	a	b	a	a	-	b	b	a	b	a	b	b	b	b	a	a	a	b	a	b	a	b	b	a	a	b	b	a	b	a	b	b	a	b	a	b
BHMR_13P02	b	a	a	a	b	b	a	b	b	b	a	a	b	b	a	b	a	a	b	a	a	a	b	b	a	a	a	b	a	b	a	a	a	a	a	b	b	b	a	a	b	b	b	b	a	a	a	b	a
CBHMR_13P11	a	b	a	a	b	b	b	b	b	a	a	b	b	a	b	b	b	a	a	b	a	a	a	a	a	b	a	b	b	b	a	b	a	b	a	a	a	b	a	a	b	a	b	b	b	a	b	a	b
CBHMR_13P14	b	-	-	a	-	a	-	b	a	b	a	b	-	b	b	a	b	b	b	b	a	a	b	a	b	-	a	b	b	-	b	-	a	b	a	a	a	b	b	b	a	b	b	b	a	b	b	-	-
BHMR_13P17	a	a	a	a	a	b	a	b	a	a	b	a	a	a	b	a	a	a	a	b	a	b	a	b	a	b	a	a	b	b	a	b	a	a	b	b	b	b	b	a	a	b	b	b	a	a	b	a	a
CHMR_13P21	b	b	b	a	a	b	b	a	a	b	b	a	a	b	a	b	b	b	b	b	a	b	a	b	a	a	a	a	b	b	a	b	-	a	b	b	a	b	a	b	a	a	a	a	a	a	a	b	b
BHMR_13P22	b	b	b	a	a	b	b	a	b	a	b	b	a	a	a	b	a	b	a	a	a	a	a	b	a	b	b	a	b	b	b	b	b	b	a	a	a	a	a	b	b	a	b	b	-	b	a	a	a
BHMR_14A24	a	b	a	b	b	b	a	b	a	b	b	b	b	a	b	a	b	b	b	a	a	a	b	a	b	a	a	a	a	b	a	a	a	a	a	b	b	a	a	b	b	a	b	b	a	b	b	a	a
BHMR_14B12	a	a	b	b	b	a	b	a	b	b	a	a	a	b	b	a	a	b	b	a	b	b	a	b	b	a	b	b	b	b	a	-	a	a	a	b	b	b	b	a	a	b	b	b	a	b	b	a	a
BHMR_14B13	b	b	b	a	a	b	b	a	b	a	a	b	b	b	a	b	b	-	b	a	a	b	b	b	a	b	a	a	b	a	b	b	b	a	b	a	a	a	b	a	a	b	a	b	b	a	a	a	a
BHMR_14C22	a	a	a	b	a	b	a	a	a	a	a	b	b	-	a	a	a	a	a	b	a	b	b	b	a	b	b	b	b	a	b	b	b	b	b	b	a	a	b	a	b	a	a	a	b	a	b	a	b
BHMR_14D02	a	a	a	a	-	b	a	b	a	a	b	a	a	a	b	a	a	a	a	b	a	b	a	b	a	b	a	a	b	b	a	b	a	a	b	b	b	-	b	a	a	b	b	b	a	b	b	a	a
BHMR_14D03***	b	b	a	b	a	b	b	a	b	b	b	a	b	b	b	b	b	b	a	b	b	b	a	b	b	b	a	a	b	b	b	b	b	b	b	a	b	a	b	a	a	b	a	b	b	b	b	b	a
CBHMR_14D22	b	a	a	a	b	b	a	b	b	b	a	a	b	b	a	b	a	a	b	a	a	a	b	b	a	a	a	b	a	b	a	a	a	a	a	b	b	b	a	a	b	b	b	b	a	a	a	b	a
BHMR_14D24	a	b	a	b	b	a	a	b	a	a	a	a	b	b	a	a	b	b	a	a	b	b	b	b	a	b	a	b	a	a	a	a	a	b	b	a	a	b	b	b	b	a	a	a	-	-	b	b	b
BHMR_14E02	a	b	b	b	b	b	b	b	a	b	b	b	b	a	a	a	a	b	a	a	a	b	b	a	b	b	b	a	a	b	a	a	a	a	a	b	a	a	a	b	b	a	b	b	b	b	a	a	b
BHMR_14E17*	b	a	a	a	b	b	a	b	b	b	a	a	b	b	a	b	a	a	b	a	a	a	b	b	a	a	a	b	a	b	b	a	a	a	a	b	b	b	a	a	b	b	b	-	a	a	a	b	a
CBHMR_14F15	a	b	b	b	b	a	a	b	a	a	a	b	b	b	a	a	a	a	a	a	b	b	b	b	a	b	a	b	a	a	a	a	a	b	b	a	a	b	b	b	b	a	b	a	b	b	b	a	b
BHMR_14G02	a	b	a	b	a	b	a	a	-	b	b	a	b	b	b	b	b	b	a	b	b	b	a	b	b	a	a	a	a	a	b	b	b	b	b	b	b	b	a	a	a	b	a	b	b	a	b	b	b
BHMR_14G03	b	b	a	b	b	b	b	a	a	b	b	a	a	a	a	a	a	a	b	b	a	b	a	a	b	a	a	a	b	b	b	a	b	b	a	b	a	a	a	b	a	a	a	a	b	a	b	a	a
BHMR_14G15	a	b	b	a	b	a	a	a	b	a	b	a	b	a	a	a	b	b	b	a	b	a	b	b	b	a	b	b	a	a	b	b	b	a	b	a	b	a	b	a	a	a	b	a	a	b	b	b	a
BHMR_14G23	b	b	b	a	a	b	b	a	b	a	b	b	a	a	a	b	a	b	a	a	a	a	a	b	a	b	b	a	b	b	b	b	b	b	a	a	a	a	a	b	b	a	b	b	a	b	a	a	a
BHMR_14H02	b	b	b	b	a	a	a	b	b	b	-	b	b	b	b	a	b	a	b	b	a	a	-	a	a	b	b	-	b	b	b	a	a	b	a	a	a	b	b	a	a	b	b	b	-	-	b	a	b
BHMR_14H15	b	b	a	a	a	b	b	a	b	a	a	a	a	b	b	b	b	a	a	b	a	a	b	b	a	b	b	a	a	a	b	b	a	b	a	-	b	b	a	b	b	-	a	a	b	b	-	a	b
BHMR_14H16	a	b	a	b	a	b	-	a	a	b	b	a	a	b	b	b	b	b	a	b	b	b	a	b	b	a	a	a	-	a	b	b	b	a	b	b	b	b	b	a	a	b	a	-	b	a	b	b	b
CBHMR_14H18	b	b	b	a	a	b	a	a	b	b	b	a	a	b	b	a	a	a	a	b	b	b	a	a	b	a	a	a	b	a	a	a	a	a	a	a	a	b	a	a	b	a	a	b	b	a	b	a	a
BHMR_14H19	a	a	b	b	b	a	b	a	b	b	a	a	a	b	b	a	a	b	b	a	b	b	a	b	b	a	b	b	b	b	a	b	a	a	a	b	b	b	b	a	a	b	b	b	a	b	b	a	a
BHMR_14I05	b	b	a	b	b	b	b	a	a	b	b	a	a	a	a	a	a	a	b	b	a	b	a	a	b	a	a	a	b	b	b	a	b	b	a	b	a	a	a	b	a	a	a	a	b	a	b	a	a
BHMR_14I16	a	a	a	b	a	b	a	a	a	a	a	b	b	a	a	a	a	a	a	b	a	b	b	b	a	b	b	b	b	a	b	b	b	b	b	b	a	a	b	a	b	a	a	a	b	a	b	a	b
BHMR_14I23	a	b	b	a	a	b	a	b	b	a	b	b	a	b	b	a	b	b	b	a	b	a	b	a	b	b	b	a	b	a	b	b	a	a	b	a	b	b	a	b	a	a	a	a	b	b	a	b	b
BHMR_14J06	a	a	b	b	b	a	b	a	b	b	a	a	a	b	b	a	a	b	b	a	b	b	a	b	b	a	b	b	b	b	a	b	a	a	a	b	b	b	b	a	a	b	b	b	a	b	b	a	a
BHMR_14J07*	a	a	a	b	a	a	b	a	a	b	a	a	b	a	a	a	a	a	a	b	a	a	a	a	a	b	a	a	a	b	a	a	b	a	b	b	b	b	b	a	b	b	b	b	a	b	b	a	b
BHMR_14J17	a	b	b	a	a	b	b	b	b	b	a	b	a	b	b	a	a	b	a	b	a	a	a	a	a	b	-	b	a	b	b	b	a	b	a	b	b	b	b	b	b	a	b	b	a	a	b	b	b
BHMR_14J18	b	b	b	a	a	b	b	b	a	a	b	a	a	a	a	b	b	a	b	b	a	a	b	a	a	b	a	b	b	a	a	b	a	a	b	b	a	b	a	b	a	b	a	a	a	b	a	b	b
BHMR_14K06	a	b	a	b	a	b	a	a	a	b	b	a	a	b	b	b	b	b	a	b	b	b	a	b	b	a	a	a	a	a	b	b	b	a	b	b	b	b	b	a	a	b	a	b	b	a	b	b	b
BHMR_14K24	a	a	a	b	a	a	b	a	a	b	a	a	b	a	a	a	a	a	a	b	a	a	a	a	a	b	a	a	a	b	a	a	b	a	b	b	b	b	b	a	b	b	b	b	a	b	b	a	b
CHMR_14L04	b	b	b	a	a	b	b	a	a	b	b	a	a	b	a	b	b	b	b	b	a	b	a	b	a	a	a	a	b	b	a	b	-	a	b	b	a	b	a	b	a	a	a	a	a	a	a	b	b
CBHMR_14L10*	a	b	a	b	b	a	b	a	b	b	b	b	a	a	a	b	a	a	b	b	a	b	a	b	a	a	b	a	a	a	b	b	b	a	a	a	a	a	b	a	a	b	a	a	b	a	a	b	a
BHMR_14L11	a	b	b	a	b	a	b	a	b	b	b	b	b	b	b	b	a	a	a	b	a	b	b	b	a	a	b	a	a	b	b	b	b	a	a	a	a	a	b	a	a	b	a	b	b	a	a	b	a
BHMR_14L13*	a	b	b	b	b	a	a	b	a	a	b	a	b	b	b	a	a	a	b	b	a	b	a	b	b	a	b	b	a	b	a	a	b	b	a	b	a	a	b	b	a	a	b	b	a	a	b	b	a
BHMR_14L19	a	b	-	b	b	a	a	b	a	a	b	a	b	b	b	a	b	a	b	b	a	b	a	b	b	b	b	b	a	b	a	a	b	b	a	b	b	a	a	b	a	b	b	b	a	a	b	b	a
BHMR_14M02	b	b	b	a	a	b	b	a	b	a	b	b	a	a	a	b	a	b	a	a	a	a	a	a	a	b	b	a	b	a	b	b	b	b	a	a	a	a	a	b	a	a	b	b	a	a	a	a	b
BHMR_14M03	a	a	b	b	b	a	b	a	b	b	a	a	a	b	b	a	a	b	b	a	b	b	a	b	b	a	b	b	b	b	a	b	-	a	a	b	b	b	b	a	a	b	b	b	-	b	b	a	a
BHMR_14N03	b	a	a	a	a	a	b	b	b	b	b	a	a	b	b	a	b	a	a	b	a	b	b	b	b	b	a	b	b	b	b	b	a	b	a	a	b	a	b	b	a	b	b	b	b	b	a	a	a
CBHMR_14N06	b	a	a	a	a	a	b	b	b	b	b	a	a	b	b	a	b	a	a	b	a	b	b	b	b	b	a	b	b	b	b	b	a	b	a	a	b	a	b	b	a	b	b	b	b	b	a	a	a
CBHMR_14N08	a	a	a	a	a	b	a	b	b	a	b	a	a	a	b	a	a	a	b	b	a	b	a	b	b	a	a	b	b	b	a	b	a	a	b	b	b	a	b	a	a	b	b	b	a	a	b	a	a
BHMR_14N09***	a	b	b	b	b	a	a	b	a	a	b	a	b	b	b	a	a	a	b	b	a	b	-	b	b	a	b	b	a	a	b	a	a	b	a	b	a	a	b	b	b	a	a	b	b	a	b	b	a
BHMR_14N13	b	b	b	a	a	b	b	a	b	a	b	b	b	b	a	b	a	b	a	a	a	b	b	a	a	b	b	a	b	a	b	b	b	a	b	a	a	a	b	b	a	a	a	b	-	-	a	a	b
BHMR_14N15	b	b	a	a	b	b	b	a	b	b	a	b	a	b	a	b	a	b	b	a	a	b	a	b	a	a	a	a	b	b	a	a	a	b	a	b	b	b	a	b	b	a	b	a	a	a	b	b	b
CBHMR_14N21	a	a	b	b	a	b	a	b	b	a	a	a	a	b	a	b	a	b	a	b	b	b	-	a	b	a	a	a	b	a	b	b	a	b	b	a	a	a	a	b	b	b	b	b	a	a	a	b	a
BHMR_14O03	b	b	a	b	b	b	a	b	a	b	b	b	a	a	b	b	a	a	a	a	b	a	a	b	a	b	b	a	a	a	a	b	a	b	b	a	b	a	b	b	a	a	a	a	a	a	b	b	a
BHMR_14O19	b	b	b	b	b	a	b	b	b	b	a	b	b	b	a	b	a	a	a	a	a	a	b	b	a	b	b	b	b	-	b	b	a	b	b	a	a	b	b	b	b	a	a	a	b	a	b	b	a
BHMR_14P04	b	b	b	a	a	a	a	b	a	b	a	b	b	b	b	a	b	b	b	b	a	a	b	a	b	a	a	b	b	b	b	a	a	b	a	a	a	b	b	b	a	b	b	b	a	b	b	a	a
BHMR_14P18	b	b	b	b	b	a	b	b	b	b	a	b	b	b	a	b	a	a	a	a	a	a	-	b	a	b	a	b	b	a	b	b	a	b	b	a	a	b	b	b	b	a	a	a	b	a	b	b	a
BHMR_15A07	a	b	b	a	b	b	b	b	b	b	b	b	a	b	b	a	a	a	a	b	a	a	a	a	a	b	a	b	a	b	a	b	a	b	b	b	b	b	b	a	b	b	b	b	a	a	b	a	b
CBHMR_15A14	b	b	b	a	a	b	b	a	b	a	b	b	b	b	a	b	b	a	b	a	a	b	b	a	a	b	b	a	b	a	b	b	b	a	b	a	a	a	b	a	a	b	a	b	b	a	a	a	b
BHMR_15B01	a	b	a	a	b	b	b	b	b	a	b	b	b	a	b	b	b	a	b	b	a	a	a	a	a	b	a	b	b	b	a	b	a	b	a	a	a	b	a	a	b	a	b	b	b	a	b	a	b
BHMR_15C07	a	b	b	a	a	b	b	b	b	b	a	b	a	b	b	a	a	b	a	a	a	a	a	a	a	b	a	b	a	-	b	b	a	b	a	b	b	b	b	b	b	a	b	b	a	a	b	b	b
CBHMR_15D02	a	a	a	b	a	b	a	b	b	a	b	a	a	a	b	b	b	a	b	b	a	b	a	a	b	a	a	b	b	b	b	b	b	a	b	b	b	a	b	a	a	b	b	b	a	a	b	a	a
BHMR_15D13	b	b	a	b	b	b	a	b	a	b	b	b	a	a	b	b	a	a	a	a	b	a	a	b	a	b	b	a	a	a	a	b	a	b	b	a	b	a	b	b	a	a	a	a	a	a	b	b	a
CBHMR_15D24	a	b	b	a	b	a	a	a	b	a	b	b	a	a	a	a	b	b	a	b	b	a	-	b	b	a	b	b	a	a	b	a	b	a	a	a	b	a	b	a	a	a	a	a	a	b	b	b	a
BHMR_15E04	a	b	a	a	b	b	b	b	b	a	b	b	a	a	b	b	b	a	b	b	a	a	a	a	a	b	a	b	b	b	a	b	a	b	a	a	a	b	-	a	b	a	b	b	b	a	b	a	b
BHMR_15E05	a	a	a	b	a	b	a	a	a	a	a	b	b	a	a	a	a	a	a	b	a	b	b	b	a	b	b	b	b	a	b	b	b	b	b	-	a	a	b	a	b	a	a	a	b	a	b	a	b
BHMR_15E24	b	a	a	a	b	b	a	b	b	b	a	a	b	b	a	b	a	a	b	a	a	a	b	b	a	a	a	b	a	b	a	a	a	a	a	b	b	a	b	a	b	b	b	b	a	a	a	b	a
BHMR_15F05	a	a	b	b	a	b	a	b	b	a	b	a	a	b	a	a	a	b	a	b	b	b	a	a	b	a	b	a	b	a	b	b	a	b	b	a	a	a	a	b	b	a	a	a	b	a	a	b	a
BHMR_15F07	b	b	a	a	b	b	b	b	b	b	a	a	a	b	b	b	b	b	b	a	a	a	a	b	b	a	a	b	a	a	a	a	a	a	a	b	b	a	b	a	b	b	b	b	a	a	a	b	a
CBHMR_15F11	a	b	b	a	a	b	a	b	b	a	b	b	a	b	b	a	b	b	a	a	b	b	a	a	b	a	b	a	b	a	b	b	b	b	b	a	a	b	a	b	a	a	a	a	b	b	a	b	b
BHMR_15F24	b	a	a	a	b	b	a	b	b	b	a	a	b	b	a	b	a	a	b	a	a	a	b	b	a	a	a	b	a	b	a	a	a	a	a	b	b	a	b	a	b	b	b	b	a	a	a	b	a
BHMR_15G08	b	b	b	b	a	a	a	b	b	b	a	b	b	-	b	a	b	a	b	b	a	a	b	a	a	b	b	b	b	-	b	a	a	b	a	a	a	b	b	a	a	b	b	b	a	b	b	a	a
CBHMR_15G12	a	b	a	a	b	b	b	b	b	a	a	b	b	a	b	b	b	a	a	b	a	a	a	a	a	b	a	b	b	b	a	b	a	b	a	a	a	b	-	a	b	a	b	b	b	a	b	a	b
BHMR_15G16***	b	b	a	b	a	b	b	a	b	b	b	a	b	b	b	b	b	b	a	b	b	b	a	b	b	b	a	a	b	b	b	b	b	b	b	a	b	a	b	a	a	b	a	-	b	b	b	b	a
BHMR_15G21	a	b	a	b	b	a	b	b	a	a	a	a	b	a	a	a	b	b	a	a	b	b	b	b	a	b	a	b	a	a	a	a	a	b	b	a	a	b	b	b	b	a	a	a	b	b	b	b	b
CBHMR_15H04	a	a	b	b	a	b	a	a	b	a	a	a	a	b	a	b	a	b	a	b	b	b	a	a	b	a	a	a	b	a	b	b	a	b	b	a	a	a	a	b	b	b	b	b	a	a	a	b	a
BHMR_15H07	a	b	a	a	a	b	a	b	b	a	-	b	a	b	b	a	b	b	b	a	b	a	b	a	b	b	b	a	b	b	b	b	a	a	b	a	b	b	a	b	a	a	a	a	b	b	a	b	b
BHMR_15H21	a	a	b	b	-	a	b	a	b	b	a	a	a	b	b	a	a	b	b	a	b	b	a	b	b	a	-	-	-	b	a	b	a	a	a	b	b	b	b	a	a	b	b	-	a	b	b	a	a
BHMR_15I10	b	b	b	a	a	b	a	a	b	b	b	a	a	b	b	a	a	a	a	b	b	b	b	a	b	a	a	a	b	a	a	a	a	a	a	a	a	b	a	a	b	a	a	b	-	a	b	a	a
BHMR_15I20	b	b	b	a	b	b	b	b	b	b	a	b	a	b	b	a	a	b	b	-	a	b	a	a	a	-	a	b	-	b	b	-	a	b	a	b	b	b	b	b	b	a	b	-	a	a	b	b	b
BHMR_15J17	b	b	a	a	a	b	b	b	b	b	b	b	b	b	a	b	b	a	a	b	a	a	b	b	a	b	b	a	b	a	b	a	a	b	a	a	a	a	a	a	b	b	a	a	b	b	b	b	b
BHMR_15J21	b	b	b	a	a	b	a	a	b	b	b	a	a	b	b	a	a	a	a	b	b	b	b	a	b	a	a	a	b	a	a	a	a	a	a	a	a	b	a	a	b	a	a	b	b	a	b	a	a
CBHMR_15K10	a	b	b	b	b	a	b	b	a	a	a	b	b	b	a	a	a	a	a	a	a	b	a	b	a	b	b	a	a	a	b	a	b	b	b	a	b	b	b	b	b	a	b	a	b	b	b	a	b
BHMR_15K12	a	b	a	b	b	a	b	b	a	a	a	a	b	a	a	a	b	b	a	a	b	b	a	b	a	b	a	b	a	a	a	a	a	b	b	a	a	b	b	b	b	a	a	a	b	b	b	b	b
BHMR_15K16	a	b	a	b	b	a	b	b	b	a	b	b	b	a	a	b	a	a	a	a	a	a	a	b	a	b	a	b	b	a	b	a	a	b	b	a	b	a	b	b	b	a	b	a	a	b	b	a	b
BHMR_15K19	b	a	b	b	b	b	a	b	a	b	a	a	a	a	b	b	a	a	a	a	b	a	b	b	a	b	b	a	a	a	b	-	a	b	b	a	b	a	b	b	a	a	a	b	a	a	b	b	a
BHMR_15K23	a	b	b	a	a	b	a	b	b	a	b	b	b	b	b	a	b	b	b	a	b	a	a	a	b	a	b	a	b	a	b	b	b	a	b	a	a	b	a	b	a	a	a	a	b	b	a	b	b
BHMR_15L11	a	a	a	b	a	b	a	b	b	a	b	a	a	a	b	b	b	a	b	b	a	b	a	a	b	a	a	b	b	b	b	b	b	a	b	b	b	a	b	a	a	b	b	b	a	a	b	a	a
CBHMR_15L18	a	a	a	b	a	b	a	b	b	b	b	a	a	b	b	a	b	b	a	a	b	a	b	b	a	a	-	b	a	a	b	b	-	a	b	b	a	a	b	a	b	b	a	b	b	b	b	b	b
BHMR_15M22	b	b	a	a	a	a	a	a	b	a	b	b	a	a	b	b	a	b	a	a	b	a	a	b	a	b	b	b	a	b	b	b	a	a	b	a	a	a	b	a	b	b	b	a	b	b	b	a	a
CBHMR_15N16	b	a	a	a	b	b	a	b	b	b	a	a	b	b	a	b	a	a	b	a	a	a	b	b	a	a	-	b	a	b	a	a	a	a	a	b	b	a	b	a	b	b	b	b	a	a	b	b	a
BHMR_15N20**	a	b	a	b	b	b	a	b	b	b	b	a	a	a	a	a	a	a	b	a	b	a	a	b	a	a	a	a	b	a	b	b	a	a	a	a	a	a	b	a	a	b	a	a	b	a	b	a	a
BHMR_15N21	-	b	a	b	a	b	a	a	a	b	b	a	b	b	b	b	b	b	a	b	b	b	a	b	b	a	a	a	a	a	b	b	b	b	b	b	b	b	a	a	a	b	a	b	b	a	b	b	b
BHMR_15N23	b	b	b	b	b	a	b	b	b	b	a	b	b	b	a	a	a	a	a	b	a	a	b	b	a	b	b	b	b	a	b	b	a	b	b	b	a	b	b	b	b	a	a	a	b	a	b	a	b
BHMR_15P11	a	b	a	a	b	b	b	b	b	a	b	b	b	a	b	b	b	a	b	b	a	a	a	a	a	b	a	b	b	b	a	b	a	b	a	a	a	b	a	a	b	a	b	b	b	a	b	a	b
BHMR_15P13	b	a	a	a	a	a	a	b	a	a	a	a	b	b	a	a	a	b	a	b	b	b	b	a	a	b	a	a	a	b	b	b	b	b	a	b	b	a	a	a	b	b	a	a	b	a	a	b	b
BHMR_16B16	a	b	b	a	a	b	b	b	b	b	a	b	a	b	b	a	a	b	a	b	a	a	a	a	a	b	a	b	a	b	b	b	a	b	a	b	b	b	b	b	b	a	b	b	a	a	b	b	b
BHMR_16B20	a	b	a	b	b	a	a	b	a	a	a	a	b	b	a	a	b	b	a	a	b	b	b	b	a	b	a	b	a	a	a	a	a	b	b	a	a	b	b	b	b	a	a	a	b	b	b	b	b
BHMR_16C20	b	b	b	a	a	b	b	a	b	a	a	b	b	b	a	b	b	a	b	a	a	b	b	a	a	b	b	a	b	a	b	b	b	a	b	a	a	a	b	a	a	b	a	b	b	a	a	a	b
CBHMR_16D01	b	a	b	b	b	b	a	a	a	a	a	a	b	b	a	b	b	a	b	b	b	b	a	b	b	b	a	a	a	b	b	a	b	a	a	b	b	b	a	a	b	a	a	b	-	-	a	a	a
CBHMR_16D21	b	a	a	a	b	b	a	b	b	b	a	a	b	b	a	b	a	a	b	a	a	a	b	b	a	a	a	b	a	b	a	a	a	a	a	b	b	a	b	a	b	b	b	b	a	a	b	b	a
CBHMR_16E04	b	b	b	b	b	a	b	a	b	b	a	a	a	b	a	b	b	a	a	a	a	a	b	b	a	b	a	b	b	a	b	b	a	b	b	a	a	b	b	-	b	a	a	a	b	a	b	b	a
BHMR_16E05	-	b	b	b	b	a	a	b	a	a	b	b	b	b	b	a	b	b	a	b	b	b	b	b	b	b	b	b	a	b	a	a	b	b	a	a	b	a	b	b	a	b	b	a	a	a	b	b	a
BHMR_16E24	b	b	b	a	a	b	b	a	b	a	b	b	a	a	a	b	a	b	a	a	a	a	a	a	a	b	b	a	b	a	b	b	b	b	a	a	a	a	a	b	a	a	b	b	a	a	a	a	b
BHMR_16F09*	a	b	b	b	b	a	a	b	a	a	b	a	b	b	b	a	b	a	b	b	a	b	a	b	b	b	b	b	a	b	a	a	b	b	a	b	b	a	a	b	a	b	b	b	a	a	b	b	a
CBHMR_16F17	a	a	a	a	a	b	a	b	b	a	b	a	a	a	b	a	a	a	b	b	a	b	a	b	-	a	a	b	b	-	a	b	a	a	b	b	b	a	-	a	a	b	b	b	a	a	b	a	a
BHMR_16F22	b	a	b	a	a	a	a	b	a	-	b	a	b	b	a	a	a	b	b	b	a	b	b	a	-	b	a	a	a	b	b	b	b	b	a	b	b	a	a	b	b	-	a	a	b	a	a	b	b
BHMR_16G03	a	a	a	a	a	b	a	b	a	a	b	a	a	a	b	a	a	a	a	b	a	b	a	b	a	b	a	a	b	b	a	b	a	a	b	b	b	b	b	a	a	b	b	b	a	a	b	a	a
CBHMR_16G06	b	a	a	a	b	b	a	b	b	b	a	a	b	b	a	b	a	a	b	a	a	a	b	b	a	a	a	b	a	b	a	a	a	a	a	b	b	a	b	a	b	b	b	b	a	a	a	b	a
BHMR_16G11****	a	b	b	b	-	b	b	b	b	b	a	b	b	b	b	a	a	b	a	a	a	b	a	-	a	-	b	b	a	b	b	b	b	b	a	b	b	b	b	b	b	a	b	b	b	-	b	b	b
BHMR_16G18	b	b	b	a	a	b	b	a	b	a	a	b	b	b	b	b	b	a	b	b	a	b	b	b	a	b	a	a	b	a	b	b	b	a	b	a	a	a	b	a	a	b	a	b	b	a	a	a	a
BHMR_16G21	b	b	b	b	a	a	a	b	b	b	a	b	b	-	b	a	b	a	b	b	a	a	b	a	a	b	b	b	b	b	b	a	a	b	a	a	a	b	b	a	a	b	b	b	a	b	b	a	a
CBHMR_16H17	b	b	b	b	b	a	b	b	b	b	a	b	b	b	a	b	a	-	a	a	a	a	b	b	a	b	b	b	b	a	b	b	a	b	b	a	a	b	b	b	b	a	a	a	b	a	b	b	a
BHMR_16J03	b	b	b	a	b	-	-	-	b	-	b	a	b	a	b	a	b	b	b	a	b	a	b	b	b	a	b	b	a	a	b	b	b	a	b	a	b	a	b	a	a	b	b	a	a	b	b	b	a
BHMR_16J16	b	b	a	a	b	a	a	a	b	a	b	a	b	a	b	a	b	b	a	a	b	a	b	b	b	a	b	b	a	a	b	b	b	a	b	a	b	a	b	a	a	b	b	b	a	a	b	b	b
BHMR_16J22	a	b	a	a	a	b	b	b	b	a	a	b	a	a	a	b	a	b	b	a	a	b	a	a	a	a	b	a	b	b	a	a	a	b	b	a	b	b	a	a	b	b	b	a	a	b	b	b	b
BHMR_16K01	a	b	a	b	b	a	b	a	b	b	b	b	a	a	a	b	a	a	b	b	a	b	a	b	a	-	b	a	a	b	b	b	b	a	a	a	a	-	b	a	a	b	a	-	b	a	a	b	a
CBHMR_16K21	a	b	b	a	b	b	b	b	a	b	b	b	a	b	b	a	a	a	a	b	a	a	a	a	a	b	a	b	a	a	a	b	a	b	b	b	b	b	b	a	b	b	b	b	a	a	b	a	b
BHMR_16L04	a	b	a	b	b	a	b	b	a	a	a	a	b	a	a	a	b	b	a	a	b	b	a	b	a	b	a	b	a	a	a	a	a	b	b	a	a	b	b	b	b	a	a	a	b	b	b	b	b
CBHMR_16L14	a	b	a	b	b	a	b	b	a	b	-	a	a	a	a	a	a	b	b	b	b	b	a	b	a	b	b	b	-	a	b	a	a	b	a	a	a	a	a	a	b	b	a	a	b	a	b	b	b
BHMR_16L23	a	b	a	b	b	a	b	b	b	a	b	b	b	a	a	b	a	a	a	a	a	a	a	b	a	b	a	b	b	a	b	a	a	b	b	a	b	a	b	b	b	a	b	a	a	b	b	a	b
BHMR_16M11	a	b	b	b	b	a	b	b	a	a	b	b	b	a	a	b	a	a	a	a	a	a	a	b	a	b	a	b	b	a	b	a	a	b	b	a	b	b	b	b	b	a	b	a	a	b	b	a	b
CBHMR_16M17	a	b	b	a	a	a	b	a	b	b	b	b	b	b	b	b	a	a	a	b	a	b	b	b	a	a	b	a	a	b	b	b	b	a	a	a	a	a	b	a	a	b	a	b	b	a	a	b	a
BHMR_16M24	b	-	b	a	a	b	b	a	b	a	b	b	a	a	a	b	a	b	a	a	a	a	a	a	a	b	b	a	b	a	b	b	b	b	a	a	a	a	a	b	a	a	b	b	a	a	a	a	b
BHMR_16N01	b	a	a	a	b	b	a	b	b	b	a	a	b	b	a	b	a	a	b	a	a	a	b	b	a	a	a	b	a	b	a	a	a	a	a	b	b	a	b	a	b	b	b	b	a	a	a	b	a
CBHMR_16N16	b	a	a	b	a	b	b	b	b	a	a	b	b	a	a	a	a	a	a	b	a	-	b	b	a	b	b	b	b	a	b	b	b	b	b	b	a	a	b	a	b	a	a	a	b	a	b	a	b
BHMR_16N23	a	b	b	b	b	a	a	b	a	a	a	b	b	b	a	a	a	a	b	a	b	b	b	b	a	b	a	b	a	a	a	a	b	b	b	a	b	b	b	b	b	a	b	a	b	b	b	a	b
BHMR_16N24	b	a	a	b	b	a	b	b	b	a	b	b	b	b	a	b	a	a	a	b	a	a	b	a	a	b	a	a	b	a	b	b	a	b	b	a	b	a	b	a	b	a	b	b	a	b	b	a	b
BHMR_16O09	a	a	b	b	b	a	b	a	b	b	a	a	a	b	b	a	a	b	b	a	b	b	a	b	b	a	b	b	b	b	a	b	a	a	a	b	b	b	b	a	a	b	b	b	a	b	b	a	a
CBHMR_16O12	b	a	a	a	b	b	a	b	b	b	a	a	b	b	a	b	a	a	b	a	a	a	b	b	a	a	a	b	a	b	a	a	a	a	a	b	b	a	b	a	b	b	b	b	a	a	a	b	a
BHMR_16O20	a	a	b	b	b	a	b	a	b	b	a	a	a	b	b	a	a	b	b	a	b	b	a	b	b	a	b	b	b	-	a	b	a	a	a	b	b	b	b	a	a	b	b	b	a	b	b	a	a
BHMR_16O24	a	b	b	b	b	a	a	b	a	a	a	b	b	b	a	a	a	a	b	a	b	b	a	b	a	b	b	a	a	a	b	a	-	b	b	a	b	b	b	b	b	a	b	a	b	b	b	a	b
BHMR_16P01	b	a	a	a	a	a	a	b	a	b	b	a	b	a	a	a	a	b	b	b	a	b	b	a	a	b	a	a	a	b	b	b	b	b	a	b	b	a	a	a	b	b	a	a	b	a	a	b	b
CBHMR_16P06	b	a	b	b	b	b	a	b	a	b	a	a	a	a	b	b	a	a	a	a	b	a	b	b	a	b	b	a	a	a	b	a	a	b	b	a	b	a	b	b	a	a	a	b	a	a	b	b	a
CBHMR_16P23	a	a	a	a	a	b	a	b	b	a	b	a	a	a	b	a	a	a	b	b	a	b	a	b	b	a	a	b	b	b	a	b	a	a	b	b	b	a	b	a	a	b	b	b	a	a	b	a	a
Cgca-0004	a	b	a	a	b	b	b	b	a	a	b	-	a	b	b	b	a	a	b	b	a	a	a	a	a	b	a	b	b	b	a	b	a	b	b	a	b	b	b	a	b	a	b	b	b	a	b	a	b
CMAT	a	b	a	b	b	a	b	b	a	b	a	a	b	a	a	a	a	b	b	b	b	b	a	b	a	b	b	b	b	a	b	a	a	b	a	a	a	a	a	a	b	b	b	a	a	a	a	b	b
CORF_43	a	b	a	a	a	b	b	b	b	a	a	b	a	a	a	b	a	b	b	a	a	b	a	a	a	a	b	a	b	b	a	a	b	b	b	a	b	b	a	a	b	b	b	a	a	b	a	b	b
CSTIE3	b	a	a	b	b	a	a	b	a	a	b	b	a	a	b	b	a	b	a	b	b	a	a	b	a	b	b	b	a	a	a	b	a	a	b	a	a	a	b	a	b	b	b	a	b	b	a	a	a
Ctcc-0006	a	b	b	a	b	b	b	b	a	a	b	b	a	b	a	b	a	a	b	b	a	a	a	a	a	b	a	b	a	b	a	b	a	b	b	a	b	b	b	a	b	a	b	b	a	a	b	a	b
[truncated: 76 more columns]
