# Supplementary material for: Meiosis Drives Extraordinary Genome Plasticity in the Haploid Fungal Plant Pathogen Mycosphaerella graminicola
Source: PLoS One. 2009 Jun 10;4(6):e5863. doi: 10.1371/journal.pone.0005863 (PMC2689623; doi:10.1371/journal.pone.0005863)
Supplement: Table S12 — Graphical genotyping (5.15 MB XLS) [file pone.0005863.s016.xls]

## Sheet: Cross IPO323 xIPO94269
IPO323 x IPO94269	Isolates:	1	10	12	14	22/27	23	24	29	40	47	50	51	62	68	73	83	84	87	88	90	91	94	95	100	109/110	111	115	116/117	118	119	124	125	126	131	132	134	136	137	142	144	147	157	158	160	164	167	173	174
Loci	cM
group 5+10
AEGTMpAT_418	0	a	a	a	a	a	a	a	a	b	b	b	a	b	a	b	b	b	b	a	b	b	b	a	a	a	a	b	b	b	b	b	b	b	b	a	b	b	b	b	a	b	a	b	a	a	a	a	b
CAHMR_04I09	1.883	b	a	a	a	a	a	a	a	b	b	b	a	b	a	b	b	b	b	a	b	b	b	a	a	a	a	b	a	b	b	b	b	b	b	a	b	b	b	b	a	b	a	b	a	a	a	a	b
CAHMR_03H08	5.914	a	a	a	a	a	a	a	a	b	b	b	a	b	a	b	b	b	a	b	b	b	b	a	a	a	a	b	a	b	b	b	b	b	b	a	b	b	b	b	a	b	a	b	a	a	a	a	b
AHMR_07H11	14.292	a	a	b	a	a	a	a	a	b	b	b	a	b	a	b	b	b	a	-	-	b	b	a	b	b	a	b	a	b	b	b	b	b	b	a	b	b	b	b	a	b	a	b	a	a	b	a	b
CABMR_07P14	16.632	a	a	b	a	a	a	a	a	b	b	b	a	b	a	b	b	b	a	b	b	b	b	a	b	b	a	b	a	b	b	b	b	b	b	a	b	b	b	b	a	b	a	b	a	a	b	a	b
AHMR_03L19	27.903	a	b	b	a	b	a	a	a	b	b	a	a	b	a	b	b	b	a	b	b	b	a	a	b	b	a	b	a	b	a	b	b	a	b	a	b	b	a	b	a	b	a	b	a	a	b	a	b
AHMR_15K21	27.903	a	b	b	a	b	a	a	a	b	b	a	a	b	a	b	b	b	a	b	b	b	a	a	b	b	a	b	a	b	a	b	b	a	b	a	b	b	a	b	a	b	a	b	a	a	b	a	b
CABMR_03I08	29.579	a	b	b	b	b	a	a	a	b	b	a	a	b	a	b	b	b	a	b	b	b	a	a	b	b	a	b	a	b	a	b	b	a	b	a	b	b	a	b	a	b	a	b	a	a	b	a	b
AHMR_15G14	29.579	a	b	b	b	b	a	a	a	b	b	a	a	b	a	b	b	b	a	b	b	b	a	a	b	b	a	b	a	b	a	b	b	a	b	-	b	b	-	b	a	b	a	b	-	a	-	a	b
CABMR_08O18	29.579	a	b	b	b	b	a	a	a	b	b	a	a	b	a	b	-	b	a	b	b	b	a	a	b	b	a	b	a	b	a	b	b	a	-	a	b	b	a	b	-	b	a	b	a	a	b	a	b
AEGTMpAT_622	29.579	a	b	b	b	b	a	a	a	b	b	a	a	b	a	b	b	b	a	b	b	b	a	a	b	-	a	b	a	b	a	b	b	a	b	a	b	b	a	b	a	b	a	b	a	a	b	a	b
BEATMpCG_214	29.579	a	b	b	b	b	a	a	a	b	b	a	a	b	a	b	b	b	a	b	b	b	a	a	b	b	a	b	a	b	a	b	b	a	b	a	b	b	a	b	a	b	a	b	a	a	b	a	b
AEGTMpAT_188	29.579	a	b	b	b	b	a	a	a	b	b	a	a	b	a	b	b	b	a	b	b	b	a	a	b	b	a	b	a	b	a	b	b	a	b	a	b	b	a	b	a	b	a	b	a	a	b	a	b
AEATMpCG_141	29.579	a	b	b	b	b	a	a	a	b	b	a	a	b	a	b	b	b	a	b	b	b	a	a	b	b	a	b	a	b	a	b	b	a	b	a	b	b	a	b	a	b	a	b	a	a	b	a	b
AEATMpAG_82	30.631	a	b	b	b	b	a	a	a	b	b	a	a	b	b	b	b	b	a	b	b	b	a	a	b	b	a	b	a	b	a	b	b	a	b	a	b	b	a	b	a	b	a	b	a	a	b	a	b
AHMR_01E04	34.099	a	b	b	b	b	a	a	a	b	a	a	a	b	a	b	b	b	a	b	b	b	a	a	b	b	a	b	a	b	a	b	b	a	b	a	b	a	a	b	a	b	a	b	a	a	b	b	b
ABMR_01K05	34.099	-	b	b	b	b	a	a	a	-	a	a	a	b	a	b	b	b	a	b	b	b	a	a	-	b	a	b	a	b	a	b	b	a	-	a	b	a	a	b	a	b	a	b	a	a	b	b	b
AHMR_15H19	34.099	a	b	b	b	b	a	a	a	-	a	a	a	b	a	b	b	b	a	b	b	b	a	a	b	b	a	b	a	b	a	b	b	a	-	a	-	a	a	b	a	b	a	b	a	a	b	b	b
AHMR_04B14	34.099	a	b	b	b	b	a	a	a	b	a	a	a	b	a	b	b	b	a	b	b	b	a	a	b	b	a	b	a	b	a	b	b	a	b	a	-	a	a	b	a	-	a	b	a	a	b	b	b
ABMR_10E12	34.099	a	b	b	b	b	a	a	a	b	a	a	-	b	a	b	b	b	a	b	b	b	a	a	b	b	a	b	a	b	a	b	b	a	b	a	b	a	a	b	a	b	a	b	a	a	b	b	b
CAHMR_07K01	34.099	a	b	b	b	b	a	a	a	b	a	a	a	b	a	b	b	b	a	b	b	b	a	a	b	b	a	b	a	b	a	b	b	a	b	a	b	a	a	b	a	b	a	b	a	a	b	b	b
AHMR_08E01	35.695	a	b	b	b	b	a	a	a	b	a	a	a	b	a	b	b	a	a	b	b	b	a	a	b	b	a	b	a	b	a	b	b	a	b	a	b	a	a	b	a	b	a	b	a	a	b	b	b
AHMR_15L21	35.695	a	b	-	b	b	a	a	a	b	a	a	a	b	a	b	b	a	a	b	b	b	a	a	b	b	a	b	a	b	a	b	b	a	b	a	b	a	a	b	a	b	a	b	a	a	b	b	b
AEGAMpCC_142	38.641	a	b	b	b	b	a	a	a	b	a	a	a	b	a	b	b	a	a	b	b	b	a	a	b	b	a	b	a	b	b	b	b	a	b	a	b	a	a	b	a	b	a	b	a	a	b	b	b
AHMR_02A15	38.641	a	b	b	b	b	a	a	a	b	a	a	a	b	a	b	b	a	a	b	b	b	a	a	b	b	a	b	a	b	b	b	b	a	b	-	b	a	a	b	a	b	a	b	a	a	b	b	b
CAHMR_03A23	40.796	a	b	b	b	b	a	a	a	b	b	a	a	b	b	b	b	a	a	b	b	b	a	a	b	b	a	b	a	b	b	b	b	a	b	a	b	a	a	b	a	b	a	b	a	a	b	b	b
AHMR_15I02	40.796	a	b	b	b	b	a	a	a	b	b	a	a	b	b	b	b	a	a	b	b	b	a	a	b	b	a	b	a	b	b	b	b	a	b	a	b	a	a	b	a	b	a	b	a	a	b	b	b
AHMR_14F08	40.796	a	b	b	b	b	a	a	a	b	b	a	a	b	b	b	b	a	a	b	b	b	a	a	b	b	a	b	a	b	b	b	b	a	b	a	b	a	a	b	a	b	a	b	a	a	b	b	b
AHMR_11P20	40.796	a	b	b	b	b	a	a	a	b	b	a	a	b	b	b	b	a	a	b	b	b	a	a	b	b	a	b	a	b	b	b	b	a	b	a	b	a	a	b	a	b	a	b	a	a	b	b	b
AEATMpCG_331	41.962	b	b	b	b	b	a	a	a	b	b	a	a	b	b	b	b	a	a	b	b	b	a	a	b	b	a	b	a	b	b	b	b	a	b	a	b	a	a	b	a	a	a	b	a	a	b	b	b
AHMR_10B10	43.035	a	b	b	b	b	a	a	a	b	b	a	a	b	b	b	b	a	a	b	b	b	a	a	b	b	a	b	a	b	b	b	b	a	b	a	b	a	a	b	a	b	a	b	a	b	b	b	b
AHMR_10N20	43.035	a	b	b	b	b	a	a	a	b	b	a	a	b	b	b	b	a	a	b	b	b	a	a	b	b	a	b	a	b	b	b	b	a	b	a	b	a	a	b	a	b	a	b	a	b	b	b	b
AHMR_03L15	46.301	a	b	b	b	b	a	a	a	b	b	a	a	b	b	b	b	a	a	b	b	b	a	a	b	b	a	b	a	b	b	b	b	a	b	a	b	a	a	b	b	b	a	a	a	b	b	b	b
ABMR_05J18	47.946	a	b	a	b	b	a	a	a	b	b	a	a	b	b	b	b	a	a	b	b	b	a	a	b	b	a	b	a	b	b	b	b	a	b	a	b	a	a	b	b	b	a	a	a	b	b	b	b
AHMR_02E05	47.946	a	b	a	b	b	a	a	a	b	b	a	a	b	b	b	b	a	a	b	b	b	a	a	b	-	a	b	a	b	b	b	b	a	b	a	b	a	a	b	-	-	a	a	a	b	b	b	b
AHMR_09F05	47.946	a	b	a	b	b	a	a	a	b	b	a	a	b	-	b	b	a	a	b	b	-	a	a	b	b	a	b	a	b	b	b	b	a	b	a	b	a	a	b	b	b	a	a	a	b	b	b	b
AHMR_03E04	47.946	a	b	a	b	b	a	a	a	b	b	a	a	b	b	b	b	a	a	b	b	b	a	a	b	b	a	b	a	b	b	b	b	a	b	-	b	a	a	b	b	b	a	a	a	b	b	b	b
ABMR_11L01	47.946	a	b	a	b	b	a	a	a	b	b	a	a	b	b	b	b	a	a	b	b	b	a	a	b	b	a	b	a	b	b	b	b	a	b	a	b	a	a	b	b	b	a	a	a	b	b	b	b
ABMR_08K20	47.946	a	b	a	b	b	a	a	a	b	b	a	a	b	b	b	b	a	a	b	b	b	a	a	b	b	a	b	a	b	b	b	b	a	b	a	b	a	a	b	b	b	a	a	a	b	b	b	b
ABMR_06M13	47.946	a	b	a	b	b	a	a	a	b	b	a	a	b	b	b	b	a	a	b	b	b	a	a	b	b	a	b	a	b	b	b	b	a	b	a	b	a	a	b	b	b	a	a	a	b	b	b	b
CABMR_08J15	49.497	a	b	a	b	b	a	a	a	b	b	a	a	b	b	b	b	a	a	b	b	b	a	a	b	b	a	b	a	b	b	b	b	a	b	a	b	a	a	b	b	a	a	a	a	b	b	b	b
CBBMR_14C18	49.497	a	b	a	b	b	a	a	a	b	b	a	a	b	b	b	b	a	a	b	b	b	a	a	b	b	a	b	a	b	b	b	b	a	b	a	b	a	a	b	b	a	a	a	a	b	b	b	b
CBBMR_13M23	49.497	a	b	a	b	b	a	a	a	b	b	a	a	b	b	b	b	a	a	b	b	b	a	a	b	b	a	b	a	b	b	b	b	a	b	a	b	a	a	b	b	a	a	a	a	b	b	b	b
AEGTMpAT_91	49.497	a	b	a	b	b	a	a	a	b	b	a	a	b	b	b	b	a	a	b	b	b	a	a	b	b	a	b	a	b	b	b	b	a	b	a	b	a	a	b	b	a	a	a	a	b	b	b	b
ABMR_03D01	50.887	a	b	a	b	b	a	a	a	b	a	a	a	b	b	b	b	a	a	b	b	b	a	a	b	b	a	b	a	b	b	b	b	a	b	a	b	a	a	b	b	a	a	a	a	b	b	b	b
AHMR_06N06	50.887	a	b	a	b	b	a	a	a	b	a	a	-	-	b	b	b	a	a	b	b	b	a	a	b	b	a	b	a	b	b	b	b	a	b	a	b	a	a	b	b	a	-	a	a	b	b	b	b
AHMR_06I03	50.887	a	b	a	b	b	-	a	a	b	a	a	a	b	b	b	b	a	a	b	b	b	a	a	b	b	a	b	a	b	b	b	b	a	b	-	b	a	a	b	b	a	a	a	a	b	b	b	b
AEGCMpCA_193	50.887	a	b	a	b	b	a	a	a	b	a	a	a	b	b	b	b	a	a	b	b	b	a	a	b	b	a	b	a	b	b	b	b	a	b	a	b	a	a	b	b	a	a	a	a	b	b	b	b
AEATMpAG_225	50.887	a	b	a	b	b	a	a	a	b	a	a	a	b	b	b	b	a	a	b	b	b	a	a	b	b	a	b	a	b	b	b	b	a	b	a	b	a	a	b	b	a	a	a	a	b	b	b	b
ABMR_03E15	50.887	a	b	a	b	b	a	a	a	b	a	a	a	b	b	b	b	a	a	b	b	b	a	a	b	b	a	b	a	b	b	b	b	a	b	a	b	a	a	b	b	a	a	a	a	b	b	b	b
AHMR_16G04	54.333	a	b	a	b	b	a	a	a	b	a	a	a	b	b	b	b	a	a	b	b	b	b	a	b	b	a	b	a	b	b	b	b	a	b	a	b	a	a	b	b	a	a	a	a	b	b	b	b
ABMR_12O09	54.333	a	b	a	b	b	a	a	a	b	a	a	a	-	b	b	b	a	-	b	b	b	b	a	b	b	a	b	a	b	b	b	-	a	b	a	b	a	a	b	b	a	a	a	a	b	b	b	b
CABMR_07P10	54.333	a	b	a	b	b	a	a	a	b	a	a	a	b	b	b	b	a	a	b	b	b	b	a	b	b	a	b	a	b	b	b	b	a	b	a	b	a	a	b	-	a	a	a	a	-	b	b	b
CABMR_02D17	54.333	a	b	a	b	b	a	a	a	b	a	a	a	b	b	b	b	a	a	b	b	b	b	a	b	b	a	b	a	b	b	b	b	a	-	a	-	a	a	b	b	a	a	a	a	b	b	b	b
AEGCMpCA_70	54.333	a	b	a	b	b	a	a	a	b	a	a	a	b	b	b	b	a	a	b	b	b	b	a	b	b	a	b	a	b	b	b	b	a	b	a	b	a	a	b	b	a	a	a	a	b	b	b	b
BEGGMpCG_147	54.333	a	b	a	b	b	a	a	a	b	a	a	a	b	b	b	b	a	a	b	b	b	b	a	b	b	a	b	a	b	b	b	b	a	b	a	b	a	a	b	b	a	a	a	a	b	b	b	b
BEGCMpCA_238	54.333	a	b	a	b	b	a	a	a	b	a	a	a	b	b	b	b	a	a	b	b	b	b	a	b	b	a	b	a	b	b	b	b	a	b	a	b	a	a	b	b	a	a	a	a	b	b	b	b
BEGGMpAT_174	55.88	a	b	a	a	b	a	a	a	b	a	a	a	b	b	b	b	a	a	b	b	b	b	a	b	b	a	b	a	b	b	b	b	a	b	a	b	a	a	b	b	a	a	a	a	b	b	b	b
ABMR_03F04	55.88	a	b	a	a	b	a	a	a	b	a	a	a	b	b	b	b	a	a	b	b	b	b	a	b	b	a	b	a	b	b	b	b	a	b	a	b	a	a	b	b	a	a	-	a	b	b	b	b
ABMR_04K20	63.308	a	b	a	a	a	a	a	a	b	a	a	a	b	b	b	b	a	a	b	b	b	b	a	b	b	a	b	-	b	b	b	b	a	b	a	b	a	a	b	b	a	a	a	a	b	a	b	a
BEGGMpAT_162	66.458	a	b	a	a	a	a	a	a	b	a	a	a	b	b	b	b	a	a	b	b	b	b	a	b	b	a	b	b	b	b	b	b	a	b	a	b	a	a	b	b	a	a	a	a	b	a	b	a
AHMR_15N19	66.458	a	b	a	a	a	a	a	a	-	a	a	a	-	b	b	b	a	a	b	b	b	b	a	b	b	a	b	-	b	b	b	b	a	b	a	b	a	a	b	b	a	a	a	a	b	a	b	a
AEGAMpCC_580	72.508	b	b	a	a	a	a	a	a	a	a	a	a	b	b	b	b	a	a	b	b	b	b	a	b	b	a	b	a	b	b	b	b	a	b	a	a	a	a	b	b	a	a	a	a	b	a	b	a
BEGTMpAT_217	79.791	b	a	a	a	a	a	b	a	a	a	a	a	b	b	b	b	a	a	b	a	b	b	a	b	b	a	b	a	a	b	b	b	a	b	a	a	a	a	b	b	a	a	a	a	b	a	b	a
BBMR_11E01	81.192	b	a	a	a	a	a	b	a	a	a	a	a	b	b	b	b	a	a	b	a	b	b	a	b	b	a	b	a	a	b	b	b	a	b	a	a	a	a	b	b	a	a	a	a	b	a	b	a
CBHMR_13M12	81.192	b	a	a	a	a	a	b	a	a	a	a	a	b	b	b	b	-	a	b	a	b	b	a	b	b	-	b	a	-	b	b	-	-	b	a	a	a	a	b	b	-	a	a	a	b	a	b	a
CBHMR_16K21	84.086	b	a	a	a	a	a	b	a	a	a	a	a	b	b	a	b	a	a	b	a	b	b	a	b	b	a	b	a	a	b	b	b	-	b	a	a	a	a	b	b	a	a	a	a	b	a	b	a
AHMR_06P20	85.613	b	a	a	b	a	a	b	a	a	a	a	a	b	b	a	b	a	a	b	a	b	b	a	b	b	a	b	a	a	b	b	b	a	b	a	a	a	a	b	b	a	a	a	a	b	a	b	a
CBBMR_16B15	85.613	b	a	a	b	a	a	b	a	a	a	a	a	b	b	a	b	a	a	b	a	b	b	a	b	b	a	b	a	a	b	b	b	a	b	a	a	a	a	b	b	a	a	a	a	b	a	b	a
AHMR_14P09	85.613	b	a	a	b	a	a	b	a	a	a	a	a	b	b	a	b	a	a	b	a	b	b	a	b	b	a	b	a	a	b	b	b	a	b	a	a	a	a	b	b	a	a	a	a	b	a	b	a
CABMR_07I21	91.297	b	a	a	b	a	a	b	a	a	a	a	a	b	b	a	b	a	a	b	a	b	b	a	b	b	a	b	a	a	a	b	b	a	b	a	a	a	a	b	b	a	a	b	a	a	a	b	a
BEGAMpAG_198	91.297	b	a	a	b	a	a	b	a	a	a	a	a	b	b	a	b	a	a	b	a	b	b	a	b	b	a	b	a	a	a	b	b	a	b	a	a	a	a	b	b	a	a	b	a	a	a	b	a
ABMR_07F10	92.65	b	a	a	b	a	a	b	a	a	a	a	a	b	b	a	b	a	a	b	a	b	b	a	b	b	a	b	a	a	a	b	b	a	b	a	a	a	a	b	b	a	a	b	a	a	a	b	a
ABMR_02P15	95.768	b	a	a	b	a	a	b	a	a	a	b	a	b	b	a	b	a	a	b	a	b	b	a	b	b	a	b	a	a	a	b	b	a	b	a	a	a	a	a	b	a	a	b	a	a	a	b	a
Ctcc-0006	95.768	b	a	a	b	a	a	b	a	a	a	b	a	b	b	a	b	a	a	b	a	b	b	a	b	b	a	b	a	a	a	b	b	a	b	a	a	a	a	-	b	a	-	b	a	a	a	b	a
BEGGMpCG_430	95.768	b	a	a	b	a	a	b	a	a	a	b	a	b	b	a	b	a	a	b	a	b	b	a	b	b	a	b	a	a	a	b	b	a	b	a	a	a	a	a	b	a	-	b	a	a	a	b	-
AHMR_01H14	95.768	b	a	a	b	a	a	b	a	a	a	b	a	b	b	a	b	a	a	b	a	b	b	a	b	b	a	b	a	a	a	b	b	a	b	a	a	a	a	a	b	a	a	b	a	a	a	b	a
CABMR_08A19	99.575	b	a	a	b	a	a	b	a	a	a	b	a	b	b	a	b	a	a	b	a	b	b	a	b	b	a	b	a	a	a	b	b	a	b	a	a	a	b	a	b	a	a	b	a	a	a	b	a
CABMR_06I23	99.575	b	a	a	b	a	a	b	a	a	a	b	a	b	b	a	b	a	a	b	a	b	b	a	b	b	a	b	a	a	a	b	b	a	b	a	a	a	b	a	b	a	a	b	a	a	a	b	a
ABMR_05C04	105.839	b	a	a	b	a	a	b	a	a	a	b	a	b	b	a	b	a	a	b	a	b	a	a	b	b	a	b	a	b	a	b	b	a	b	a	a	a	b	a	b	a	a	b	a	a	a	b	a
ABMR_05J19	105.839	b	a	a	b	a	a	b	a	a	a	b	a	b	b	a	b	-	a	b	a	-	a	a	b	b	a	b	a	b	a	b	b	a	b	a	a	a	b	a	b	a	a	b	a	a	a	b	a
ABMR_05M03	110.809	b	a	a	b	a	a	b	a	a	a	b	a	b	-	a	b	a	a	b	b	b	a	a	b	b	a	b	a	b	a	b	b	a	b	a	b	b	b	a	b	a	a	b	a	a	a	b	a
ABMR_02D09	110.809	b	a	a	b	a	a	b	a	a	a	b	a	b	b	a	b	a	a	b	b	b	a	a	b	b	a	b	a	b	a	b	b	a	b	a	b	b	b	a	b	a	a	-	a	a	a	-	a
Cgca-0004	110.809	b	a	a	b	a	a	b	a	a	a	b	a	b	b	a	b	a	a	b	b	b	a	a	b	b	a	b	a	b	a	b	b	a	b	a	b	b	b	a	b	a	-	b	a	a	a	b	a
gca-0007	111.227	b	a	a	b	a	a	b	a	a	a	b	a	b	a	a	b	a	a	b	b	b	a	a	b	b	a	b	a	b	a	b	b	a	b	a	b	b	b	a	b	a	a	b	a	-	a	b	a
CAHMR_03E19	127.079	a	a	a	b	a	a	b	a	a	a	b	a	b	a	a	b	a	b	b	b	b	a	a	-	b	a	-	a	b	a	b	b	a	b	a	b	b	b	b	b	a	b	b	a	a	a	a	a
AEGAMpAG_457	130.417	-	a	a	b	a	a	b	a	a	a	b	a	a	a	a	b	b	b	b	b	b	a	a	b	b	a	b	a	b	a	b	b	a	b	a	b	b	b	b	b	a	b	a	a	a	a	a	a
AEGGMpAT_444	133.123	a	a	a	b	a	a	b	a	a	a	b	a	a	a	a	b	a	b	b	b	b	b	a	b	b	a	b	a	b	a	b	b	a	b	a	b	b	b	b	b	a	b	a	a	a	a	a	a
BEGTMpAT_468	133.123	a	a	a	b	a	a	b	a	a	a	b	a	a	a	a	b	a	b	b	b	b	b	a	b	b	a	b	a	b	a	b	b	a	b	a	b	b	b	b	b	a	b	a	a	a	a	a	a
CBHMR_13G21*	136.992	a	a	a	b	a	a	b	a	a	a	b	a	a	a	a	a	a	b	b	b	b	b	a	b	b	-	b	a	-	a	-	a	a	b	a	b	b	b	b	b	a	b	a	a	a	a	a	a
BHMR_12J02	143.17	a	b	a	b	a	a	b	a	a	a	b	a	a	a	a	a	a	b	b	b	b	b	a	b	b	b	a	b	b	a	b	a	a	b	a	b	b	b	b	b	a	b	a	a	a	b	a	a
AHMR_01M23	143.17	a	b	a	b	a	a	b	a	a	a	b	a	a	a	a	a	a	b	b	b	b	b	a	b	b	-	a	b	b	a	b	a	a	b	a	b	b	b	b	b	a	b	a	a	a	b	a	a
ABMR_15A21	144.754	a	b	a	b	a	a	b	a	a	a	b	a	a	a	a	a	a	b	b	b	b	b	a	b	b	b	a	b	b	a	b	a	a	b	a	b	b	b	b	b	a	b	a	a	a	b	a	a
CBBMR_10J15	144.754	a	b	a	b	a	a	b	a	a	a	b	a	a	a	a	a	a	b	b	b	b	b	a	b	b	b	a	b	b	a	b	a	a	b	a	b	b	b	b	b	a	b	a	a	a	b	a	a
AEGAMpCA_506	144.754	a	b	a	b	a	a	b	a	a	a	b	a	a	a	a	a	a	b	b	b	b	b	a	b	b	b	a	b	b	a	b	a	a	b	a	b	b	b	b	b	a	b	a	a	a	b	a	a
AEATMpAG_126	146.445	a	b	a	b	a	a	b	a	a	a	b	a	a	a	a	a	a	b	b	b	b	b	a	b	b	b	a	b	b	b	b	a	a	b	a	b	b	b	b	b	a	b	a	a	a	b	a	a
CBHMR_10P03	146.445	a	b	a	b	a	a	b	a	a	a	b	a	a	a	a	a	a	b	b	b	b	b	a	b	b	b	a	b	b	b	b	a	a	b	a	b	b	b	b	b	a	b	a	a	a	b	a	a
BEATMpAG_312	146.445	a	b	a	b	a	a	b	a	a	a	b	a	a	a	a	a	a	b	b	b	b	b	a	b	b	b	a	b	b	b	b	a	a	b	a	b	b	b	b	b	a	b	a	a	a	b	a	a
BEATMpAG_138	146.445	a	b	a	b	a	a	b	a	a	a	b	a	a	a	a	a	a	b	b	b	b	b	a	b	b	b	a	b	b	b	b	a	a	b	a	b	b	b	b	b	a	b	a	a	a	b	a	a
AHMR_06E08	148.603	a	b	a	b	a	a	b	a	b	a	b	a	a	a	b	a	a	b	b	b	b	b	a	b	b	b	a	b	b	b	b	a	a	b	a	b	b	b	b	b	a	b	a	a	a	b	a	a
STIB3	149.386	a	b	a	b	a	a	b	-	-	a	b	-	a	a	b	b	a	b	b	b	b	b	a	b	b	b	a	b	b	b	b	a	a	b	a	b	b	b	b	b	a	-	a	a	a	b	a	a
CBBMR_14O07	152.211	a	a	b	b	a	a	b	a	b	a	b	a	a	a	b	a	a	b	b	b	b	b	a	b	b	b	a	b	b	b	b	a	a	b	a	b	b	b	b	b	a	b	a	a	a	b	a	a
CBHMR_12P05	152.211	a	a	b	b	a	a	-	a	b	a	b	a	a	a	b	a	a	b	b	b	b	b	a	-	b	b	a	b	b	b	b	a	a	-	a	b	b	-	b	b	a	b	a	a	a	b	a	a
CAHMR_01H06	152.211	a	a	b	b	a	a	b	a	b	a	b	a	a	a	b	a	a	b	b	b	b	b	a	b	b	b	a	b	-	b	b	-	a	b	a	b	b	-	-	b	a	b	a	a	a	b	a	a
CBHMR_13P11	152.211	a	a	b	b	a	a	b	a	b	-	b	a	a	a	b	a	a	b	b	b	b	b	a	b	b	b	a	b	b	b	b	a	a	b	-	b	b	b	b	b	a	b	a	a	a	b	a	a
BHMR_15O10	152.211	a	a	b	b	a	a	b	a	b	a	b	a	a	a	b	-	a	b	b	b	b	b	a	b	b	b	a	b	b	b	b	a	a	b	a	b	b	b	b	b	a	b	a	a	a	b	a	a
ABMR_08O08	152.211	a	a	b	b	a	a	b	a	b	a	b	a	a	a	b	a	a	-	b	b	b	b	a	b	b	b	a	b	b	b	b	a	a	b	a	b	b	b	b	b	a	b	a	a	a	b	a	a
ABMR_02J04	152.211	a	a	b	b	a	a	b	a	b	a	b	a	a	a	b	a	a	b	b	b	b	b	a	b	b	b	a	b	b	b	b	a	a	b	a	b	b	b	b	b	a	b	a	a	a	b	a	a
CABMR_02F15	152.211	a	a	b	b	a	a	b	a	b	a	b	-	a	a	b	a	a	b	b	b	b	b	a	b	b	b	a	b	b	b	b	a	a	b	a	b	b	b	b	b	a	b	a	a	a	b	a	a
Cag-0006	152.211	a	a	b	b	a	a	b	a	b	a	b	a	a	a	b	a	a	b	b	b	b	b	a	b	b	b	a	b	b	b	b	a	a	b	a	b	b	b	b	b	a	b	a	a	a	b	a	a
CBHMR_15G12	152.211	a	a	b	b	a	a	b	a	b	a	b	a	a	a	b	a	a	b	b	b	b	b	a	b	b	b	a	b	b	b	b	a	a	b	a	b	b	b	b	b	a	b	a	a	a	b	a	a
BHMR_12E11	152.211	a	a	b	b	a	a	b	a	b	a	b	a	a	a	b	a	a	b	b	b	b	b	a	b	b	b	a	b	b	b	b	a	a	b	a	b	b	b	b	b	a	b	a	a	a	b	a	a
BEGTMpAT_745	152.211	a	a	b	b	a	a	b	a	b	a	b	a	a	a	b	a	a	b	b	b	b	b	a	b	b	b	a	b	b	b	b	a	a	b	a	b	b	b	b	b	a	b	a	a	a	b	a	a
CBBMR_15B01	152.211	a	a	b	b	a	a	b	a	b	a	b	a	a	a	b	a	a	b	b	b	b	b	a	b	b	b	a	b	b	b	b	a	a	b	a	b	b	b	b	b	a	b	a	a	a	b	a	a
AEGGMpAT_74	155.958	a	a	b	b	a	b	b	b	b	a	b	a	a	a	b	b	b	b	b	b	b	b	a	b	b	b	a	b	b	b	b	a	a	b	a	b	b	b	b	b	a	b	a	a	a	b	a	a
CBBMR_13O05	160.213	a	a	b	b	a	a	b	a	a	a	b	a	a	a	b	a	a	b	b	b	b	b	a	b	b	a	a	b	b	b	b	a	b	b	a	b	b	b	b	b	a	b	a	a	b	b	a	a
BBMR_16J05	160.213	a	a	b	b	a	a	b	a	a	a	b	a	a	a	b	a	a	b	b	b	b	b	a	b	b	a	a	b	b	b	b	a	b	b	a	b	b	b	b	b	a	b	a	a	b	b	a	a
BHMR_10I23	160.213	a	a	b	b	a	a	b	a	a	a	b	a	a	a	b	a	a	b	b	b	b	b	a	b	b	a	a	b	b	b	b	a	b	b	a	b	b	b	b	b	a	b	a	a	b	b	a	a
ABMR_16F17	161.878	a	a	b	b	a	a	b	b	a	a	b	a	a	a	b	a	a	b	b	b	b	b	a	b	b	a	a	b	b	b	b	a	b	b	a	b	b	b	b	b	a	b	a	a	b	-	a	a
BEGAMpCG_308	163.776	a	a	b	b	a	a	a	b	a	a	b	a	-	a	b	a	a	b	b	b	b	b	a	b	b	a	a	b	b	b	b	a	b	b	a	b	b	b	b	b	a	b	a	a	b	b	a	a
BEGCMpCA_173	170.379	a	a	b	b	a	a	a	b	a	a	b	a	a	b	b	a	b	b	b	b	b	b	a	b	b	a	a	b	a	b	b	a	b	b	a	b	b	b	b	b	a	b	a	a	b	b	a	a
AEGCMpCA_174	174.381	a	a	b	a	a	a	a	b	a	a	a	a	a	a	a	a	b	b	b	b	b	b	a	b	b	a	a	b	a	b	b	a	b	b	a	b	b	b	b	b	a	b	a	a	b	b	a	a
ABMR_02J20	193.131	a	a	a	b	a	a	a	b	a	a	b	b	a	b	b	a	b	b	a	b	b	a	b	b	a	a	a	b	a	b	b	b	b	b	a	b	a	b	a	b	a	a	a	a	b	b	a	a
ABMR_11J07	193.131	a	a	a	b	a	-	a	b	a	a	b	b	a	-	b	a	b	b	a	b	b	a	b	b	a	a	a	b	a	-	b	b	b	b	a	b	a	b	a	b	a	a	a	a	b	b	a	a
AHMR_14E04	193.131	a	a	a	b	a	a	a	b	a	a	b	b	a	b	b	a	b	b	a	b	b	a	b	b	a	a	a	b	a	b	b	b	b	b	a	b	a	b	a	b	a	a	a	a	b	b	a	a
AHMR_12G17	193.131	a	a	a	b	a	a	a	b	a	a	b	b	a	b	b	a	b	b	a	b	b	a	b	b	a	a	a	b	a	b	b	b	b	b	a	b	a	b	a	b	a	a	a	a	b	b	a	a
AHMR_04G03	193.131	a	a	a	b	a	a	a	b	a	a	b	b	a	b	b	a	b	b	a	b	b	a	b	b	a	a	a	b	a	b	b	b	b	b	a	b	a	b	a	b	a	a	a	a	b	b	a	a
CABMR_04O10	194.853	a	a	a	b	b	a	a	b	a	a	b	b	a	b	b	a	b	b	a	b	b	a	b	b	a	a	a	b	a	b	b	b	b	b	a	b	a	b	a	b	a	a	a	a	b	b	a	a
AHMR_14N24	194.853	a	a	a	b	b	a	a	b	a	a	b	b	a	b	b	a	b	b	a	b	b	a	-	b	a	a	a	b	a	b	b	b	b	b	a	b	a	b	a	b	a	a	a	a	b	b	a	a
BEGGMpCG_307	198.231	a	a	a	b	b	a	a	b	a	a	b	b	a	b	b	a	b	b	a	a	b	a	b	b	a	a	a	b	a	b	b	b	b	b	a	b	a	b	a	b	a	a	a	a	b	b	a	a
group 2
BBMR_11E24	0	b	b	a	b	b	a	a	a	b	b	a	b	a	b	a	a	a	a	b	a	b	a	b	a	b	a	a	a	a	a	a	a	a	a	a	b	b	b	b	b	a	a	a	a	b	b	b	a
CBHMR_09F06	0	b	b	a	b	b	a	a	a	b	b	a	b	a	b	a	a	a	a	b	a	b	a	b	a	b	a	a	a	a	a	a	a	a	a	a	b	b	b	b	b	a	a	a	a	b	b	b	a
CBBMR_10K04	0	b	b	a	b	b	a	a	a	b	b	a	b	a	b	a	a	a	a	b	a	b	a	b	a	b	a	a	a	a	a	a	a	a	a	a	b	b	b	b	b	a	a	a	a	b	b	b	-
ABMR_06E20	3.329	b	b	b	b	b	a	a	a	b	b	a	b	a	b	a	a	a	a	b	a	b	a	b	a	b	a	a	a	a	a	a	a	a	a	a	b	b	b	b	b	a	a	a	a	b	b	b	b
AEGAMpAG_362	12.319	b	b	b	b	b	a	a	a	b	b	a	b	a	b	a	a	a	a	b	a	b	a	b	a	b	a	a	a	b	a	a	a	a	a	b	a	b	b	b	b	a	a	a	a	b	a	a	b
BEATMpCG_273	27.408	b	b	b	b	b	a	b	a	a	b	b	a	a	a	a	b	a	a	b	a	b	b	a	a	b	a	a	a	b	a	b	-	-	a	b	a	b	b	b	b	b	a	a	a	b	a	a	b
ac-0006	33.811	b	b	b	b	b	a	b	a	b	b	b	a	a	a	a	b	a	a	b	a	a	b	a	a	b	a	a	b	b	a	b	a	a	a	b	a	a	b	a	b	b	a	a	b	b	a	a	b
ABMR_06C17	41.918	b	b	b	b	b	a	b	a	a	b	b	a	a	a	b	b	a	b	b	a	a	a	b	b	a	a	a	b	b	a	b	a	a	a	-	a	a	b	a	b	b	b	a	b	-	a	a	b
CBHMR_14L10	41.918	b	b	b	b	b	a	b	a	a	b	b	a	a	a	b	b	a	b	b	a	a	a	-	b	a	a	a	b	b	a	b	a	a	a	b	a	a	b	a	b	b	b	a	b	b	a	a	b
ABMR_01C23	50.012	b	b	b	b	b	a	b	a	a	b	b	a	a	a	b	b	a	b	b	a	b	a	b	b	a	a	a	b	b	a	b	a	a	a	b	a	a	a	a	b	b	b	a	b	b	a	a	a
BEGTMpAT_377	54.291	b	b	b	b	b	a	b	b	b	b	b	a	a	a	b	b	a	b	b	a	b	a	b	b	a	a	a	b	b	a	b	-	b	b	b	a	a	a	a	b	b	b	a	b	b	a	a	a
ABMR_15E18	55.503	b	b	b	b	b	a	b	a	b	b	b	a	a	a	b	b	a	b	b	a	b	a	b	b	a	a	a	b	b	a	b	a	b	b	b	a	a	a	a	b	b	b	a	b	b	a	a	a
BEATMpCG_205	55.503	b	b	b	b	b	a	b	a	b	b	b	a	a	a	b	b	a	b	b	a	b	a	b	b	a	a	a	b	b	a	b	a	b	b	b	a	a	a	a	b	-	b	a	b	b	a	a	a
AEGAMpAC_356	56.822	b	b	b	b	b	a	b	a	b	b	b	a	a	a	b	b	b	b	b	a	b	a	b	b	a	a	a	b	b	a	b	a	b	b	b	a	a	a	a	b	b	b	a	b	b	a	a	a
CBHMR_12O07	59.08	b	b	b	b	b	a	b	a	b	b	b	a	a	a	b	b	a	b	b	a	b	a	b	b	a	a	a	b	b	b	b	a	b	b	b	a	a	a	a	b	b	b	a	b	b	a	a	a
AEGAMpCA_321	59.08	b	b	b	b	b	a	-	a	b	b	b	a	a	a	b	b	a	b	b	a	b	a	b	-	a	a	a	b	b	b	b	a	b	b	b	a	a	a	a	b	b	b	a	b	b	a	a	a
CBHMR_16M17	62.425	b	b	b	b	b	a	b	a	b	b	b	a	a	a	b	b	a	b	b	a	b	a	b	b	a	a	a	b	b	b	b	a	b	b	b	b	a	a	a	b	b	b	a	b	b	a	a	a
BEGAMpAC_324*	63.397	b	b	b	b	b	a	b	a	b	b	b	a	a	a	b	b	b	b	b	a	b	a	b	b	a	a	a	b	b	b	b	a	b	b	b	b	a	a	a	b	b	b	a	b	b	a	a	a
ag-0011*	63.936	b	b	b	b	b	a	b	a	b	b	b	a	a	a	b	b	a	b	b	a	b	a	b	b	a	a	a	b	b	b	b	a	b	b	b	b	a	a	a	b	b	-	a	b	b	a	a	a
AEGTMpAT_557	68.108	b	b	b	b	b	a	b	a	b	b	a	a	a	a	b	b	a	b	b	a	b	a	b	b	a	a	a	b	b	b	b	a	b	b	b	b	a	b	a	a	b	b	a	b	b	a	a	a
BEGGMpAT_401	73.038	b	b	b	b	b	a	b	a	b	b	a	a	a	b	b	b	a	b	b	a	b	a	b	b	a	a	a	b	b	b	b	a	b	b	b	b	b	b	a	a	b	b	a	a	b	a	a	a
BEGAMpCC_474	75.101	b	b	b	b	b	a	b	a	b	b	a	a	a	b	b	b	a	b	a	a	b	a	b	b	a	a	a	b	b	b	b	a	b	b	b	b	b	b	a	a	b	b	a	a	b	a	a	a
CAHMR_05D24	77.95	b	b	b	b	b	a	b	a	b	b	a	a	a	b	a	b	b	b	a	a	b	a	b	b	a	a	a	b	b	b	b	a	b	b	b	b	b	b	a	a	b	b	a	a	b	a	a	a
AEGTMpAT_548*	78.668	b	b	b	b	b	a	b	a	b	b	a	a	a	b	a	b	b	b	b	a	b	a	b	b	a	a	a	b	b	b	b	a	b	b	b	b	b	b	a	a	b	b	a	a	b	a	a	a
CAHMR_03A17**	78.668	b	b	b	b	b	a	b	a	b	b	a	a	a	b	a	b	b	b	b	a	b	a	b	b	a	-	a	b	b	b	b	a	b	b	b	b	b	b	a	a	b	b	a	a	b	a	a	a
AHMR_12F18	83.84	b	b	b	b	b	a	b	a	b	b	a	a	a	b	a	b	b	b	b	a	b	b	a	b	a	a	a	b	b	b	b	a	b	b	b	b	b	b	a	a	b	b	a	a	b	a	a	a
CBBMR_10C10*	87.667	b	b	b	b	b	a	b	a	b	b	a	a	a	b	a	b	b	b	b	a	a	b	a	b	a	a	a	b	b	b	b	-	b	b	b	b	b	b	a	a	b	b	a	a	b	a	a	a
AEGAMpCC_370	88.259	b	b	b	b	b	a	b	a	b	b	a	a	a	b	a	b	b	b	b	a	a	b	a	b	a	a	a	b	b	b	b	a	a	b	b	b	b	b	a	a	b	b	a	a	b	a	a	a
CBBMR_09C10	88.259	b	b	b	b	b	a	b	a	b	b	a	a	a	b	a	b	b	b	b	a	a	b	a	b	a	a	a	b	b	b	b	a	a	b	b	b	b	b	a	a	b	b	a	a	b	a	a	a
CBBMR_14J04	88.259	b	b	b	b	b	a	b	a	b	b	a	a	a	b	a	b	b	b	b	a	a	b	a	b	a	a	a	b	b	b	b	a	a	b	b	b	b	b	a	a	b	b	a	a	b	a	a	a
BEATMpAG_278	88.259	b	b	b	b	b	a	b	a	b	b	a	a	a	b	a	b	b	b	b	a	a	b	a	b	a	a	a	b	b	b	b	a	a	b	b	b	b	b	a	a	b	b	a	a	b	a	a	a
CAHMR_04D02	88.259	b	b	b	b	b	a	b	a	b	b	a	a	a	b	a	b	-	b	b	a	a	b	a	b	a	a	a	b	b	b	b	a	a	b	b	b	b	b	a	a	b	b	a	a	b	a	a	a
ABMR_07J24	89.858	b	b	a	b	b	a	b	a	b	b	a	a	a	b	a	b	b	b	b	a	a	b	a	b	a	a	a	b	b	b	b	a	a	b	b	-	b	-	a	a	b	b	a	a	b	a	a	a
ABMR_08E20	94.204	b	b	a	b	b	a	b	a	b	b	a	a	a	b	a	b	b	b	b	a	a	b	a	b	a	a	a	b	b	b	b	b	a	b	b	b	b	b	a	a	b	b	a	a	b	a	a	b
AEGAMpAC_213	96.92	a	b	a	b	b	a	b	a	b	a	a	a	a	b	a	b	b	b	b	a	a	-	a	b	-	a	a	b	b	b	b	a	b	b	b	b	b	b	a	a	b	b	a	a	b	a	a	b
AEGAMpAC_212	98.882	a	b	a	b	b	a	b	a	b	a	a	a	a	b	a	b	b	b	b	a	a	b	a	b	b	a	a	b	b	b	b	b	a	b	b	b	b	b	a	a	b	b	a	a	b	a	a	b
AHMR_06C03	98.882	a	b	a	b	b	a	b	a	b	a	a	a	a	b	a	b	b	b	b	a	a	b	a	b	b	a	a	b	b	b	b	b	a	b	b	b	b	b	a	a	b	b	a	a	b	a	a	b
ABMR_02N09	98.882	a	b	a	b	b	a	b	a	b	a	a	a	a	b	a	b	b	b	b	a	a	b	a	b	b	a	a	b	b	b	b	b	a	b	b	-	b	b	a	a	b	b	a	a	b	a	a	b
ABMR_03D07	98.882	a	b	a	b	b	a	b	a	b	a	a	a	a	b	a	b	b	b	b	a	a	b	a	b	b	a	a	b	b	b	b	b	a	b	b	b	b	b	a	a	b	-	a	a	b	a	a	b
AHMR_08C24	98.882	a	b	-	b	b	a	b	a	b	a	a	-	a	b	a	b	b	b	b	a	a	b	a	b	b	a	a	b	-	b	b	b	a	b	b	b	b	b	a	a	b	b	a	a	b	a	a	b
ABMR_01J04	99.716	a	b	a	b	b	a	b	a	b	a	a	a	a	b	a	b	b	b	b	a	a	b	a	b	b	a	a	b	b	b	b	b	b	b	b	b	b	b	a	a	b	b	a	a	b	a	a	b
ABMR_06N21	99.716	a	b	a	b	b	a	b	a	b	a	a	a	a	b	a	b	b	b	b	a	a	b	a	b	b	a	a	b	b	b	b	b	b	b	b	b	b	b	a	a	b	b	a	a	b	a	a	b
CBBMR_14P08	99.716	a	b	a	b	b	a	b	a	b	a	a	a	a	b	a	b	b	b	b	a	a	b	a	b	b	a	a	b	b	b	b	b	b	b	b	b	b	b	a	a	b	b	a	a	b	a	a	b
BEGAMpAC_208	99.716	a	b	a	b	b	a	b	a	b	a	a	a	a	b	a	b	b	b	b	a	a	b	a	b	b	a	a	b	b	b	b	b	b	b	b	b	b	b	a	a	b	b	a	a	b	a	a	b
AHMR_06K10	99.716	a	b	a	b	b	a	-	a	b	a	a	a	a	b	a	b	b	b	b	a	a	b	a	b	b	a	a	b	b	b	b	b	b	b	b	b	b	b	a	a	b	b	a	a	b	a	a	b
AHMR_08B18	99.716	a	b	a	-	b	a	b	a	b	a	a	a	a	b	a	b	b	b	b	a	a	b	a	b	b	a	a	b	b	b	b	b	b	b	b	b	b	b	a	a	b	b	a	a	b	a	a	b
AHMR_08O14	99.716	a	b	a	b	b	a	b	a	b	a	a	a	a	b	a	b	b	b	b	a	a	b	a	b	b	a	a	b	b	b	b	b	b	b	-	b	b	b	a	a	b	b	a	a	b	a	a	b
AHMR_07J12	99.716	-	b	a	b	b	a	b	a	b	a	a	a	a	b	a	b	b	b	b	a	a	b	a	b	b	a	a	b	b	b	b	b	-	b	-	b	b	-	a	a	b	b	a	a	b	a	a	b
AEATMpCG_146	102.906	a	b	a	b	b	a	b	a	b	a	a	a	a	b	a	b	b	a	b	a	a	b	a	a	b	a	a	b	b	b	b	b	b	b	b	b	b	b	a	a	b	b	a	a	b	a	a	b
ABMR_03A05	109.015	a	b	a	b	b	a	b	a	b	b	a	b	a	b	a	b	b	a	b	a	a	b	a	a	b	a	b	a	b	b	b	b	b	b	b	b	b	b	a	a	b	b	a	a	b	a	a	b
AEGAMpAC_558	109.015	a	b	a	b	b	a	b	a	b	b	a	b	a	b	a	b	b	a	b	a	a	b	a	a	b	a	b	a	b	b	b	b	b	b	b	b	b	b	a	a	b	b	a	a	b	a	a	b
AEGGMpCG_322	109.015	a	b	a	b	b	a	b	a	b	b	a	b	a	b	a	b	b	a	b	a	a	b	a	a	b	a	b	a	b	b	b	b	b	b	b	b	b	b	a	a	b	b	a	a	b	a	a	b
AHMR_04L06	109.015	a	b	a	b	b	a	b	a	b	b	a	b	a	b	a	b	b	a	b	a	a	b	a	a	b	a	b	a	b	b	b	b	b	b	b	b	b	b	a	a	b	b	a	a	b	a	a	b
AHMR_13L19	109.015	a	b	a	b	b	a	b	a	b	b	a	b	a	b	a	b	b	a	b	a	a	b	a	a	b	a	b	a	b	b	b	b	b	b	b	b	b	b	a	a	b	b	a	a	b	a	a	b
BBMR_12C03	109.015	a	b	a	b	b	a	b	a	b	b	a	b	a	b	a	b	b	a	b	a	a	b	a	a	b	a	b	a	b	b	b	b	b	b	b	b	b	b	a	a	b	b	a	a	b	a	a	b
BEGAMpAC_556	109.015	a	b	a	b	b	a	b	a	b	b	a	b	a	b	a	b	b	a	b	a	a	b	a	a	b	a	b	a	b	b	b	b	b	b	b	b	b	b	a	a	b	b	a	a	b	a	a	b
AHMR_08G05	109.015	a	b	a	b	b	a	b	a	b	b	a	-	a	b	a	b	b	a	b	a	a	b	a	a	b	a	b	a	b	b	b	b	b	b	b	b	b	b	a	a	b	b	a	a	b	a	a	b
AHMR_10J02	109.015	a	b	a	b	b	a	b	a	b	-	a	b	a	b	a	b	b	a	b	a	a	b	a	a	b	a	b	a	b	b	b	b	-	b	b	b	b	b	a	a	b	b	a	a	b	a	a	b
AHMR_15N06	109.015	a	b	a	b	b	a	b	a	-	b	a	b	a	-	a	b	b	a	b	a	a	b	a	a	b	a	b	a	b	b	b	b	b	b	b	b	b	b	a	a	b	b	a	a	b	a	a	b
BEGAMpAG_127	110.67	a	b	a	b	b	a	b	a	b	b	a	b	a	b	a	b	a	a	b	a	a	b	a	a	b	a	b	a	b	b	b	b	b	b	b	b	b	b	a	a	b	b	a	a	b	a	a	b
CABMR_07H02	112.267	a	b	a	b	b	a	b	a	b	b	a	b	a	b	a	b	a	a	b	a	a	b	a	a	b	a	b	a	b	b	b	b	b	b	b	a	b	b	a	a	b	b	a	a	b	a	a	b
CABMR_08J01	112.267	a	b	a	b	b	a	b	a	b	b	a	b	a	b	a	b	a	a	b	a	a	b	a	a	b	a	b	a	b	b	b	b	b	b	b	a	b	b	a	a	b	b	a	a	b	a	a	b
BEGAMpAG_241	112.267	a	b	a	b	b	a	b	a	b	b	a	b	a	b	a	b	a	a	b	a	a	b	a	a	b	a	b	a	b	b	b	b	b	b	b	a	b	b	a	a	b	b	a	a	b	a	a	b
CBHMR_13F09	112.267	a	b	a	b	b	a	b	a	b	b	a	b	a	b	a	b	a	a	b	a	a	b	a	a	b	a	b	a	b	b	b	b	b	b	b	a	b	b	a	a	b	b	a	a	b	a	a	b
CBHMR_15A14	112.267	a	b	a	b	b	a	b	a	b	b	a	b	a	b	a	b	a	a	b	a	a	b	a	a	b	a	b	a	b	b	b	b	b	b	b	a	b	b	a	a	b	b	a	a	b	a	a	b
AHMR_13M03	112.267	a	b	a	b	b	a	b	a	b	b	a	b	a	b	a	b	a	a	b	a	a	b	a	a	b	a	b	a	b	b	b	-	b	b	b	a	b	b	a	a	b	b	a	a	b	a	a	b
caa-0002	112.267	a	b	a	b	b	a	b	a	b	b	a	b	a	b	a	b	a	a	b	a	a	b	a	a	b	a	b	a	b	b	b	b	b	b	b	-	b	b	a	a	b	b	a	a	b	a	a	b
ABMR_01N22	112.267	a	b	a	b	b	a	b	a	b	b	a	b	a	b	a	b	a	a	b	a	a	b	a	a	b	a	b	a	b	b	b	b	b	b	b	a	b	b	a	a	b	b	a	a	b	a	a	b
AEGAMpAG_511	113.313	a	b	a	b	b	a	b	b	b	b	a	b	a	b	a	b	a	a	b	a	a	b	-	a	b	a	b	a	b	b	b	b	b	b	b	a	b	b	a	a	b	b	a	a	b	a	a	b
CABMR_06F19	114.509	a	b	a	b	b	a	b	a	b	b	a	b	a	b	a	b	a	a	b	a	a	b	a	a	b	a	b	a	b	b	b	b	b	b	b	a	b	b	a	a	b	b	a	a	a	a	a	b
BBMR_14H02	122.898	a	b	a	b	b	a	b	a	b	b	b	b	a	b	a	b	a	a	b	a	a	b	a	b	b	a	b	a	a	b	b	b	b	b	b	a	b	b	a	a	b	b	a	b	a	a	a	b
tcc-0005	131.869	a	a	a	b	b	a	b	a	-	b	b	-	a	b	a	b	a	a	b	a	a	b	a	b	b	b	b	a	a	b	b	b	b	b	b	b	a	a	a	a	b	-	a	b	a	a	a	b
AEGAMpCG_262	140.147	a	a	a	a	a	b	b	a	b	b	b	b	a	a	a	b	a	a	b	a	a	b	a	b	b	b	b	a	a	b	b	b	b	b	a	a	b	b	a	a	b	b	a	b	a	a	a	b
BBMR_13D23	140.147	a	a	a	a	a	b	b	a	b	b	b	b	a	a	a	b	a	a	b	a	a	b	a	b	b	b	b	a	a	b	b	b	b	b	a	a	b	b	a	a	b	b	a	b	a	a	a	b
CBBMR_14M22	140.147	a	a	a	a	a	b	b	a	b	b	b	b	a	a	a	b	a	a	b	a	a	b	a	b	b	b	b	a	a	b	b	b	b	b	a	a	b	b	a	a	b	b	a	b	a	a	a	b
BEGAMpAG_262	140.147	a	a	a	a	a	b	b	a	b	b	b	b	a	a	a	b	a	a	b	a	a	b	a	b	b	b	b	a	a	b	b	b	b	b	a	a	b	b	a	a	b	b	a	b	a	a	a	b
Cag-0003	140.147	a	a	a	a	a	b	b	a	b	b	b	b	a	a	a	b	a	a	b	a	a	b	a	b	b	b	b	a	a	b	b	b	b	b	a	a	b	b	a	a	b	-	a	-	a	a	a	b
BBMR_14E11	140.147	a	a	a	a	a	b	b	a	-	b	b	b	a	a	a	-	a	a	b	a	a	b	a	b	b	b	b	a	a	b	b	b	b	b	a	a	b	b	a	a	b	b	a	b	a	a	a	b
CABMR_03E17	155.921	b	a	a	a	a	b	b	b	a	b	b	b	a	a	a	b	a	b	a	a	a	b	a	b	b	b	b	a	a	b	b	b	b	b	a	a	b	b	a	b	b	-	a	b	a	a	a	a
AEGGMpCG_173	157.55	b	a	a	a	a	b	b	b	a	a	b	b	a	a	a	b	a	b	a	a	a	b	a	b	b	b	b	a	a	b	b	a	b	b	a	a	b	b	a	b	b	a	a	b	a	a	a	a
CABMR_04D15	158.449	b	a	a	a	a	b	b	b	a	a	b	b	a	a	a	b	a	b	a	a	a	b	a	b	b	b	b	a	a	b	b	b	b	b	a	a	b	b	a	b	b	a	a	b	a	a	a	a
AEGAMpCA_265	158.449	b	a	a	a	a	b	b	b	a	a	b	b	a	a	a	b	a	b	a	a	a	b	a	b	b	b	b	a	a	b	b	b	b	b	a	a	b	b	a	b	b	a	a	b	a	a	a	a
AHMR_01J05	158.449	b	a	a	a	a	b	b	b	a	a	b	b	a	a	a	b	a	b	a	a	a	b	a	b	b	b	b	a	a	b	b	b	b	b	a	a	b	b	a	b	b	a	a	b	a	a	a	a
AHMR_16N21	158.449	b	a	a	a	a	b	b	b	a	a	b	b	a	a	a	b	a	b	a	a	a	b	a	b	b	b	b	a	a	b	b	b	b	b	a	a	b	b	a	b	b	a	a	b	a	a	a	a
CBBMR_10M04	158.449	b	a	a	a	a	b	b	b	a	a	b	b	a	a	a	b	a	b	a	a	a	b	a	b	b	b	b	a	a	b	b	b	b	b	a	a	b	b	a	b	b	a	a	b	a	a	a	a
ABMR_04M04	160.158	b	a	a	a	a	b	b	b	a	a	b	b	a	a	a	b	a	b	a	a	a	b	a	b	b	b	b	a	a	b	b	b	b	b	a	a	b	b	a	b	b	a	a	b	a	a	a	a
CBHMR_13D12	163.716	b	a	a	a	a	b	b	b	a	a	b	b	a	a	a	b	a	b	a	a	a	b	a	b	b	b	b	a	a	a	b	b	b	b	-	a	b	b	a	b	b	a	a	b	a	a	a	a
group 1
AEATMpCG_561	0	a	-	-	a	a	a	b	a	b	b	b	a	a	a	a	b	b	b	b	a	a	b	b	b	b	a	b	a	a	a	b	b	b	a	b	a	a	a	b	b	b	a	b	a	-	a	b	a
ABMR_05K18	1.038	a	b	a	a	a	a	b	a	b	b	b	a	a	a	a	b	b	b	b	a	a	b	b	b	b	a	b	a	a	a	b	b	b	a	b	a	a	a	a	b	b	a	b	a	b	a	b	a
CABMR_07D07	1.038	a	b	a	a	a	a	b	a	b	b	b	a	a	a	a	b	b	b	b	a	a	b	b	b	b	a	b	a	a	a	b	b	b	a	b	a	a	a	a	b	b	a	b	a	b	a	b	a
ABMR_01L08	13.997	a	b	a	a	a	a	b	b	b	b	b	a	a	a	a	b	a	b	b	a	a	b	b	b	b	a	b	a	a	a	b	b	b	a	b	a	b	a	a	a	b	a	b	a	a	a	b	a
CABMR_07H13	13.997	a	b	a	a	a	a	b	b	b	b	b	a	a	a	a	b	a	b	b	a	a	b	b	b	b	a	b	a	a	a	b	b	b	a	b	a	b	a	a	a	b	a	b	a	a	a	b	a
ABMR_07L03	13.997	a	b	a	a	a	a	b	b	b	b	b	a	a	a	a	b	a	b	b	a	a	b	b	b	b	a	b	a	a	a	b	b	b	a	b	a	b	a	a	a	b	a	b	a	a	a	b	a
AEATMpCG_197	13.997	a	b	a	a	a	a	b	b	b	b	b	a	a	a	a	b	a	b	b	a	a	b	b	b	b	a	b	a	a	a	b	b	b	a	b	a	b	a	a	a	b	a	b	a	a	a	b	a
ABMR_01A19	13.997	a	b	a	a	a	a	b	b	b	b	b	a	a	a	a	b	a	b	b	a	a	b	-	b	b	a	b	a	a	a	b	b	b	a	b	a	b	a	a	a	b	a	b	a	a	a	b	a
CABMR_03P12	13.997	a	b	a	a	a	a	b	b	b	b	b	a	a	a	a	b	a	b	b	a	a	b	b	b	b	a	b	a	a	a	b	b	b	a	b	a	b	a	a	a	-	a	b	a	a	a	b	a
CAHMR_04C22	13.997	a	b	a	a	a	a	b	b	b	b	b	a	a	a	a	b	a	b	b	a	a	b	b	b	b	a	b	a	a	a	b	b	b	a	b	a	b	a	a	a	b	a	b	a	a	a	b	a
AHMR_05K15	13.997	a	b	a	a	a	a	b	b	b	b	b	a	a	a	a	b	a	b	b	a	a	b	b	b	b	a	b	a	a	a	b	b	b	a	b	a	b	-	a	a	b	a	b	a	a	a	b	a
CAHMR_08O12	13.997	-	b	a	a	a	a	b	b	b	b	b	a	a	a	a	b	a	b	b	a	a	b	b	b	b	a	b	a	a	a	b	b	b	a	b	a	b	a	a	a	b	a	b	a	a	a	b	a
CHMR_12L22	13.997	a	b	-	a	a	a	b	b	b	b	b	a	a	a	a	b	a	b	b	a	a	b	b	b	b	a	b	a	a	a	b	b	b	a	b	a	b	a	a	a	b	a	b	a	a	a	b	a
AHMR_13I03	13.997	-	b	a	a	a	a	b	b	b	b	b	a	a	a	a	b	a	b	b	a	a	b	b	b	b	a	b	a	a	a	b	b	b	a	b	a	b	a	a	a	b	a	b	a	a	a	b	a
CABMR_04P23	13.997	a	b	a	a	a	a	b	b	b	b	b	a	a	a	a	b	a	b	b	a	a	b	-	b	b	a	b	a	a	a	b	b	b	a	b	a	b	-	a	a	b	a	b	a	a	a	b	a
CBMR_15A02	13.997	a	b	a	a	a	a	b	b	b	b	b	a	a	a	a	b	a	b	b	a	a	b	b	b	b	a	b	a	a	a	b	b	b	a	b	a	b	a	a	a	b	a	b	a	a	a	-	a
ABMR_07O10	13.997	a	b	a	a	a	a	b	b	b	b	b	a	a	a	a	b	a	b	b	a	a	-	b	b	b	a	b	-	a	a	b	b	b	a	b	a	b	a	a	a	b	a	b	a	a	a	b	a
AHMR_06A14	13.997	a	b	a	a	a	a	b	b	b	b	b	a	a	a	a	b	a	b	b	a	a	b	b	b	b	a	b	a	a	a	b	-	-	a	b	a	b	a	a	a	b	a	b	a	a	a	b	a
AHMR_03M15	13.997	a	b	a	a	a	a	b	b	b	b	b	a	a	a	a	-	a	b	b	a	a	b	b	b	b	a	b	a	a	a	b	b	b	a	b	a	b	-	a	a	b	a	b	a	a	a	b	a
BEGGMpCG_217	15.205	a	b	a	-	a	a	b	b	b	b	b	b	a	a	a	b	a	b	b	a	a	b	b	b	b	a	b	a	a	a	b	b	b	a	b	a	b	a	a	a	b	a	b	a	a	a	b	a
BEGAMpAG_189	16.057	a	b	a	a	a	a	b	b	b	b	b	b	a	a	a	b	b	b	b	a	a	b	b	b	b	a	b	a	a	a	b	b	b	a	b	a	b	a	a	a	b	a	b	a	a	a	b	a
BEGAMpCA_93	17.577	a	b	a	a	a	b	b	b	b	b	b	b	a	a	a	b	a	b	b	a	a	b	b	b	b	a	b	a	a	a	b	b	b	a	b	a	b	a	a	a	b	a	b	a	a	a	b	a
BEGTMpAT_89	29.285	a	a	b	a	a	b	b	b	b	b	b	b	a	a	a	b	a	b	b	a	a	b	a	b	b	a	a	a	a	b	a	b	b	a	b	a	b	a	a	a	b	a	b	a	a	a	a	a
CAHMR_01C18	30.178	a	a	b	a	a	b	b	b	b	b	b	a	a	a	a	b	a	b	b	a	a	b	a	b	b	a	a	a	a	b	a	b	b	a	b	a	b	a	a	a	b	a	b	a	a	a	a	a
CABMR_03A14*	34.651	a	a	b	a	a	b	b	b	a	a	b	a	a	a	a	b	a	b	a	a	a	b	a	b	b	a	a	a	a	b	a	b	b	a	b	a	b	a	a	a	b	a	b	a	a	a	a	a
CABMR_08E02*	34.651	a	a	b	a	a	b	b	b	a	a	b	a	a	a	a	b	a	b	a	a	a	b	a	b	b	a	a	a	a	b	a	b	b	a	b	a	b	a	a	a	b	a	b	a	a	a	a	a
CABMR_03O06*	34.651	a	a	b	a	a	b	b	b	a	a	b	a	a	a	a	b	a	b	a	a	a	b	a	b	b	a	a	a	a	b	a	b	b	a	b	a	b	a	a	a	b	a	b	a	a	-	a	a
ABMR_16A17	41.235	a	a	b	a	a	b	b	b	a	a	b	a	a	b	b	b	b	b	a	a	a	b	-	b	b	a	a	a	a	b	a	b	b	a	b	a	b	a	a	a	b	a	b	b	a	a	a	a
BEGAMpCC_125	41.769	a	a	b	a	a	b	b	b	a	a	b	b	a	b	b	b	b	b	a	a	a	b	a	b	b	a	a	a	a	b	a	b	b	a	b	a	b	a	a	a	b	a	b	b	a	a	a	a
ABMR_05J22	43.224	a	a	b	a	a	b	b	b	a	a	b	a	a	b	b	b	b	b	a	a	a	b	a	b	b	a	a	a	a	a	a	b	b	a	b	a	b	a	a	a	b	a	b	b	a	a	a	a
ABMR_06F17	43.224	a	a	b	a	a	b	b	b	a	a	b	a	a	b	b	b	b	b	a	a	a	b	a	b	b	a	a	a	a	a	a	b	b	a	b	a	b	a	a	a	b	a	b	b	a	a	a	a
CABMR_08B19	43.224	a	a	b	a	a	b	b	b	a	a	b	a	a	b	b	b	b	b	a	a	a	b	a	b	b	a	a	a	a	a	a	b	b	a	b	a	b	a	a	a	b	a	b	b	a	a	a	a
ABMR_14E17	43.224	a	a	b	a	a	b	b	b	a	a	b	a	a	b	b	b	b	b	a	a	a	b	a	b	b	a	a	a	a	a	a	b	b	a	b	a	b	a	a	a	b	a	b	b	a	a	a	a
CBHMR_16G06	43.64	a	a	b	a	a	b	b	b	a	a	b	b	a	b	b	b	b	b	a	a	a	b	a	b	b	a	a	a	a	a	a	b	b	a	b	a	b	a	a	a	b	a	b	b	a	a	a	a
CBHMR_16O12	43.64	a	a	b	a	a	b	b	b	a	a	b	b	a	b	b	b	b	b	a	a	a	b	a	b	b	a	a	a	a	a	a	b	b	a	b	a	b	a	a	a	b	a	b	b	a	a	a	a
CBHMR_11I11	43.64	a	a	b	a	a	b	b	b	-	a	b	b	a	b	b	b	b	b	a	a	a	b	a	b	b	a	a	a	a	a	a	b	b	a	b	a	b	a	a	a	b	a	b	b	a	a	a	a
CAHMR_06L18	45.105	a	a	b	a	a	b	b	b	a	a	b	a	b	b	b	b	b	b	a	a	a	b	a	b	b	a	a	a	a	a	a	b	b	a	b	a	b	a	a	a	b	a	b	b	a	a	a	a
BEGTMpAT_128	45.495	a	a	b	a	a	b	b	b	a	a	b	b	b	b	b	b	b	b	a	a	a	b	a	b	b	a	a	a	a	a	a	b	b	a	b	a	b	a	a	a	b	a	b	b	a	a	a	a
BEGTMpAT_318	45.495	a	a	b	a	a	b	b	b	a	a	b	b	b	b	b	b	b	b	a	a	a	b	a	b	b	a	a	a	a	a	a	b	b	a	b	a	b	a	a	a	b	a	b	b	a	a	a	a
BEGAMpAC_144	46.89	a	a	b	a	a	b	b	b	a	a	b	b	b	b	b	b	b	b	a	a	a	b	a	b	b	a	a	a	a	a	a	b	b	a	b	a	b	a	a	a	b	a	b	a	a	a	a	a
BBMR_13L09	46.89	a	a	b	a	a	b	-	b	a	a	b	b	b	b	b	b	b	b	-	-	a	b	a	b	b	a	-	a	a	a	a	b	b	a	b	a	b	a	a	a	b	a	b	a	a	-	a	a
CBBMR_15H01	48.525	a	a	b	a	a	b	b	b	a	a	b	b	b	b	b	b	b	b	a	a	a	b	a	b	b	a	a	a	a	a	a	b	a	a	b	a	b	a	a	a	b	a	b	a	a	a	a	a
BBMR_14K01	48.525	a	a	b	a	a	b	b	b	a	a	b	b	b	b	b	b	b	b	a	a	a	b	a	b	b	a	a	a	a	a	a	b	a	a	b	a	b	a	a	a	b	a	-	a	a	a	a	a
ac-0002	48.525	a	a	b	a	a	b	b	b	a	a	b	-	b	b	b	b	b	b	a	a	a	b	a	b	b	a	a	a	a	a	a	b	a	a	b	a	b	a	a	a	b	a	b	a	a	a	a	a
ABMR_09O12	49.677	a	a	b	a	a	b	b	b	a	a	b	a	b	b	b	b	b	b	a	a	a	b	a	b	b	a	a	a	a	a	a	b	a	a	b	a	b	a	a	a	b	a	b	a	a	a	a	a
AHMR_07B04*	49.677	a	a	b	a	a	b	b	-	a	a	b	a	b	b	b	b	b	b	-	a	a	-	a	b	b	a	a	a	a	a	a	b	a	a	b	a	b	a	a	a	b	a	b	a	a	a	a	a
CABMR_04E23	52.062	a	a	b	a	a	b	b	b	a	a	b	a	b	b	b	b	b	b	a	a	a	b	a	b	b	a	a	a	a	a	a	b	a	a	b	a	b	a	a	a	b	a	b	a	a	a	a	a
ABMR_05I21*	52.062	a	a	b	a	a	b	b	b	a	a	b	a	b	b	b	b	b	b	a	a	a	b	a	b	b	a	a	a	a	a	a	b	a	a	b	a	b	a	a	a	b	a	-	a	a	a	a	a
ABMR_02C22*	52.062	a	a	b	a	a	b	b	b	a	a	b	a	b	b	b	b	b	-	a	a	a	b	a	-	b	a	a	a	a	a	a	b	a	a	b	a	b	a	a	a	b	a	b	a	a	a	a	a
AHMR_07O17*	53.719	a	a	b	a	a	b	-	b	a	a	b	a	b	b	b	b	b	b	a	a	a	b	a	b	b	a	a	a	-	a	a	b	a	a	b	a	b	a	a	a	b	a	b	a	a	a	a	a
CBHMR_15N16	54.094	a	a	b	a	a	b	b	b	a	a	b	b	b	b	b	b	b	b	a	a	a	b	a	b	b	a	a	a	a	a	a	b	a	a	b	a	b	a	a	a	b	a	b	a	a	a	a	a
CBHMR_16D21*	54.094	a	a	b	a	a	b	b	b	a	a	b	b	b	b	b	b	b	b	a	a	a	b	a	b	b	a	a	a	a	a	a	b	a	a	b	a	-	a	a	a	b	a	b	a	a	a	a	a
ABMR_08H09	55.604	a	b	b	a	a	b	b	b	a	a	b	a	b	b	b	b	b	b	a	a	a	b	a	b	b	a	a	a	a	a	a	b	a	a	b	a	b	a	a	a	b	a	b	a	a	a	a	a
AHMR_07B11	55.604	a	b	b	a	a	b	b	b	a	a	b	a	b	b	b	b	b	b	a	a	a	b	a	b	b	a	a	a	a	a	a	b	a	a	b	a	b	a	a	a	b	a	b	a	a	a	a	a
AHMR_13N03	55.604	a	b	b	a	a	b	b	b	a	a	b	a	b	b	b	b	b	b	a	a	a	b	a	b	b	a	a	a	a	a	a	b	a	a	b	a	b	a	a	a	b	a	b	a	a	a	a	a
BEGAMpCC_71	56.014	a	b	b	a	a	b	b	b	a	a	b	b	b	b	b	b	b	b	a	a	a	b	a	b	b	a	a	a	a	a	a	b	a	a	b	a	b	a	a	a	b	a	b	a	a	a	a	a
CBBMR_13O22	56.014	a	b	b	a	a	b	b	b	a	a	b	b	b	b	b	b	b	b	a	a	a	b	a	b	b	a	a	a	a	a	a	b	a	a	b	a	b	a	a	a	b	a	b	a	a	a	a	a
BEGGMpCG_700	57.313	a	b	b	a	a	-	b	b	a	a	b	b	b	b	b	b	b	b	a	a	a	b	a	b	b	a	a	a	a	a	a	b	a	a	b	a	b	a	a	a	b	-	b	a	a	a	a	a
CBHMR_14D22	61.613	a	b	-	a	a	b	b	b	a	-	b	b	b	b	b	b	b	b	a	a	a	a	a	b	b	a	a	a	a	a	b	b	a	a	b	a	b	a	a	a	b	a	b	a	a	a	a	a
ABMR_01M20	63.235	a	b	b	a	a	b	b	b	a	b	b	a	b	b	b	b	b	b	a	a	a	a	a	b	b	a	a	a	a	a	b	b	a	a	b	a	b	a	a	a	-	a	b	a	a	a	a	a
CAHMR_05I04	63.235	-	b	b	a	a	b	b	b	a	b	b	a	b	b	b	b	b	b	a	a	a	a	a	b	b	a	a	a	a	a	b	b	a	a	b	a	b	a	a	a	b	a	b	a	a	a	a	a
CABMR_07P12	64.738	a	b	b	a	a	b	b	b	a	b	b	a	b	b	b	b	b	b	a	a	a	a	a	b	b	a	a	a	a	a	b	b	a	a	b	a	b	a	a	a	b	a	b	a	a	a	b	a
CAHMR_05H16	64.738	a	b	b	a	a	b	b	b	a	b	b	a	b	b	b	b	b	b	a	a	a	a	a	b	b	a	a	a	-	a	b	-	a	a	b	a	b	a	a	a	b	a	b	a	a	a	b	a
ABMR_07B15	66.536	a	b	b	a	a	b	b	b	a	b	b	a	b	b	b	b	b	b	a	a	a	a	a	b	b	a	a	a	a	a	b	b	a	b	b	a	b	a	a	a	b	a	b	a	a	a	b	a
AEGAMpCC_149	66.536	a	b	b	a	a	b	b	b	a	b	b	a	b	b	b	b	b	b	a	a	a	a	a	b	b	a	a	a	a	a	b	b	a	b	b	a	b	a	a	a	b	a	b	a	a	a	b	a
CBHMR_12O11	66.536	a	b	b	a	a	b	b	b	a	b	b	a	b	b	b	b	b	b	a	a	a	a	a	b	b	a	a	a	a	a	b	b	a	b	b	a	b	a	a	a	b	a	b	a	a	a	b	a
CABMR_06D24	66.536	a	b	b	a	a	b	b	b	a	b	b	a	b	b	b	b	b	b	a	a	a	a	a	b	b	a	a	a	a	a	b	b	a	b	b	a	-	a	a	a	b	a	b	a	a	a	b	a
BEGAMpAG_256	79.405	a	b	b	a	a	b	b	b	a	b	b	a	b	b	a	b	a	a	b	a	a	a	a	b	b	a	a	a	a	a	b	b	a	b	b	a	b	a	b	b	b	a	a	a	a	a	b	a
BBMR_09C23	80.512	a	b	b	a	a	b	b	b	a	b	b	a	b	b	a	b	b	a	b	a	a	a	a	b	b	a	a	a	a	a	b	b	a	b	b	a	b	a	b	b	b	a	a	a	a	a	b	a
BBMR_10H01	80.512	a	b	b	a	a	b	b	b	a	b	b	a	b	b	a	b	b	a	b	a	a	a	a	b	b	a	a	a	a	a	b	b	a	b	b	a	b	a	b	b	b	a	a	a	a	a	b	a
BBMR_13J11	80.512	a	b	b	a	a	b	b	b	a	b	b	a	b	b	a	b	b	a	b	a	a	a	a	b	b	a	a	a	a	a	b	b	a	b	b	a	b	a	b	b	b	a	a	a	a	a	b	a
BBMR_15O21	80.512	a	b	b	a	a	b	b	b	a	b	b	a	b	b	a	b	b	a	b	a	a	a	a	b	b	a	a	a	a	a	b	b	a	b	b	a	b	a	b	b	b	a	a	a	a	a	b	a
BBMR_16I10	80.512	a	b	b	a	a	b	b	b	a	b	b	a	b	b	a	b	b	a	b	a	a	a	a	b	b	a	a	a	a	a	b	b	a	b	b	a	b	a	b	b	b	a	a	a	a	a	b	a
BEGTMpAT_450	80.512	a	b	b	a	a	b	b	b	a	b	b	a	b	b	a	b	b	a	b	a	a	a	a	b	b	a	a	a	a	a	b	b	a	b	b	a	b	a	b	b	b	a	a	a	a	a	b	a
AEGTMpAT_440	80.512	a	b	b	a	a	b	b	b	a	b	b	a	b	b	a	b	b	a	b	a	a	a	a	b	-	a	a	a	a	a	b	b	a	b	b	a	b	a	b	b	b	a	a	a	a	a	b	a
BBMR_10J11	80.512	a	b	b	a	a	b	b	b	a	b	b	-	b	b	a	b	b	a	b	a	a	a	a	b	b	a	a	a	a	a	b	b	a	b	b	a	b	a	b	b	b	a	a	a	a	a	b	a
BBMR_10O02	80.512	a	b	b	a	a	b	b	b	a	b	b	a	b	b	a	b	b	a	b	a	a	a	a	b	b	a	a	a	a	a	-	b	a	b	b	a	b	a	b	b	b	a	a	a	a	a	b	a
BBMR_15M02	80.512	a	b	b	a	a	b	b	b	a	b	b	a	b	b	a	b	b	a	b	a	a	a	a	b	b	a	a	a	a	a	b	b	a	b	b	a	b	a	b	b	b	-	a	a	a	a	b	a
CBBMR_11I13	85.255	a	b	b	a	a	b	b	b	a	b	a	b	b	a	a	b	b	a	b	a	a	a	a	b	b	a	a	a	a	a	b	b	a	b	b	a	b	a	b	b	b	a	a	a	a	a	b	a
CBBMR_10B09	85.255	a	-	b	a	a	b	b	b	a	b	a	b	b	a	a	b	b	a	b	a	a	a	a	b	b	a	a	a	a	a	b	b	a	b	b	a	b	a	b	b	b	a	a	a	a	a	b	a
CBBMR_10K06	85.255	a	b	b	a	a	b	b	b	a	b	a	b	b	a	a	b	b	a	b	a	a	a	a	b	b	a	a	a	a	a	b	-	a	b	b	a	b	a	b	-	b	a	a	a	a	a	b	a
AEATMpAG_106	85.894	a	b	b	a	a	b	b	b	a	b	a	a	b	a	a	b	b	a	b	a	a	a	a	b	b	a	a	a	a	a	b	b	a	b	b	a	b	a	b	b	b	a	a	a	a	a	b	a
CAHMR_02C06	85.894	a	b	b	a	a	b	b	b	a	b	a	a	b	a	a	b	b	a	b	a	a	a	a	b	b	a	a	a	a	a	b	b	a	b	b	a	b	a	b	b	b	a	a	a	a	a	b	a
AHMR_04F20	85.894	a	b	b	a	a	b	b	b	a	b	a	a	b	a	a	b	b	a	b	a	a	-	a	-	b	a	a	a	a	a	b	b	a	b	b	a	b	a	b	b	b	a	a	a	a	a	b	a
CABMR_07K23	85.894	a	b	b	a	a	b	b	b	a	b	a	a	b	a	a	b	b	a	b	a	a	a	a	b	b	a	a	a	a	a	b	b	a	b	-	a	-	a	-	b	-	a	a	a	a	a	b	a
AHMR_06A16	87.619	a	b	b	a	a	b	b	b	a	b	a	a	b	a	a	b	b	a	b	a	a	a	a	b	b	a	a	a	a	a	b	b	a	b	b	a	b	a	b	b	b	a	a	a	a	a	b	a
AHMR_10M08	87.619	a	b	b	a	a	b	b	b	a	b	a	a	b	a	a	b	b	a	b	a	a	a	a	b	b	a	a	a	a	a	b	b	a	b	b	a	b	a	b	b	b	a	a	a	a	a	b	a
CABMR_06J10	87.619	a	b	b	a	a	b	b	b	a	b	a	a	b	a	a	b	b	a	b	a	a	a	a	b	b	a	a	a	a	a	b	b	a	b	b	a	b	a	b	b	b	a	a	a	a	-	b	a
CABMR_04O23	94.137	a	b	b	a	a	b	b	b	a	b	a	a	b	a	a	a	b	a	b	a	a	a	a	b	b	a	a	a	b	a	b	b	a	b	b	a	b	a	b	b	b	a	a	a	a	a	b	a
AEATMpAG_71	100.238	a	b	b	-	b	b	b	b	b	b	b	b	b	b	b	a	b	a	b	a	a	a	a	b	b	a	a	a	b	a	b	b	a	b	b	a	b	a	b	b	b	a	a	a	a	a	b	a
BEGTMpAT_295	113.568	b	b	b	a	b	b	b	b	a	a	a	b	b	a	a	a	b	a	b	b	a	a	b	b	b	b	a	b	b	a	b	b	a	b	b	b	b	a	b	b	b	a	a	b	a	a	b	a
AHMR_11N15	114.923	b	b	b	a	b	b	b	b	a	a	a	a	b	a	a	a	b	a	b	b	a	a	b	b	b	b	a	b	b	a	b	b	a	b	b	b	b	a	b	b	b	a	a	b	a	a	b	a
AHMR_12B18	114.923	b	b	b	a	b	b	b	b	a	a	a	a	b	a	a	a	b	a	b	b	a	a	b	b	b	b	a	b	b	a	b	b	a	b	b	b	b	-	b	b	b	a	a	b	a	a	b	a
CABMR_03J15	116.496	b	b	b	a	b	b	b	b	a	a	b	a	b	a	a	a	b	a	b	b	a	a	b	b	b	b	a	b	b	a	b	b	a	b	b	b	b	a	b	b	b	a	a	b	a	a	b	a
BEGTMpAT_84	120.043	b	b	b	a	b	b	b	b	a	a	b	a	b	a	a	a	b	a	b	b	a	a	b	b	b	b	a	b	b	a	b	b	a	b	b	b	b	a	b	b	b	a	a	b	b	a	a	a
group 6
CABMR_04F22	0	b	b	a	a	b	a	a	a	b	a	a	b	b	a	b	b	b	a	b	b	a	b	a	a	b	b	a	b	b	b	a	a	b	a	b	a	a	b	a	a	b	b	b	a	a	b	a	a
CBHMR_11E19	0	b	b	a	a	b	a	a	a	b	a	a	b	b	a	b	b	b	a	b	b	a	b	a	a	b	b	a	b	b	b	a	a	b	a	b	a	a	b	a	a	b	b	b	a	a	b	a	a
CBHMR_11F16	0	b	b	a	a	b	a	a	a	b	a	a	b	b	a	b	b	b	a	b	b	a	b	a	a	b	b	a	b	b	b	a	a	b	a	b	a	a	b	a	a	b	b	b	a	a	b	a	a
CBHMR_12O06	0	b	b	a	a	b	a	a	a	b	a	a	b	b	a	b	b	b	a	b	b	a	b	a	a	b	b	a	b	b	b	a	a	b	a	b	a	a	b	a	a	b	b	b	a	a	b	a	a
CBHMR_12P18	0	b	b	a	a	b	a	a	a	b	a	a	b	b	a	b	b	b	a	b	b	a	b	a	a	b	b	a	b	b	b	a	a	b	a	b	a	a	b	a	a	b	b	b	a	a	b	a	a
ABMR_01I11	0	b	b	a	a	b	a	a	a	b	a	a	b	b	a	b	b	b	a	b	b	a	b	a	a	b	b	a	b	b	b	a	a	b	a	b	a	a	b	a	a	b	b	b	a	a	b	a	a
CAHMR_01A18	0	b	b	a	a	b	a	a	a	b	a	a	b	b	a	b	b	b	a	b	b	a	b	a	a	b	b	a	b	-	b	a	a	b	a	b	a	a	b	a	a	b	b	b	a	a	b	a	a
CBBMR_14G17	7.152	b	b	a	a	b	a	a	a	b	a	a	b	b	a	b	b	b	a	b	b	a	b	a	a	b	b	a	a	b	b	a	a	b	a	b	a	a	b	a	b	b	a	b	a	a	b	a	b
CBBMR_14D07	7.152	b	b	a	a	b	a	a	a	b	a	a	b	b	-	b	b	b	a	b	b	a	b	a	a	b	b	a	a	b	b	a	a	b	a	b	a	a	b	a	b	b	a	b	a	a	b	a	b
CBHMR_11I20	8.859	b	a	a	a	b	a	a	a	b	a	a	b	b	a	b	b	b	a	b	b	a	b	a	a	b	b	a	a	b	b	a	a	b	a	b	a	a	b	a	b	b	a	b	a	a	b	a	b
ABMR_05E23	13.519	b	a	a	a	b	a	a	a	b	a	a	b	b	a	b	b	b	a	b	b	a	b	a	a	b	b	a	a	a	b	a	a	b	a	a	a	a	b	a	b	b	a	b	a	a	b	a	b
BEGGMpCG_421	21.609	b	a	a	a	b	a	a	a	b	a	a	b	b	a	a	b	a	a	b	b	a	b	a	a	b	b	a	a	a	b	a	a	b	b	a	a	a	b	a	b	a	a	b	a	a	b	b	b
AHMR_02P24*	31.48	b	a	a	a	b	a	a	a	b	a	a	b	a	a	a	b	a	a	b	b	b	b	a	a	b	b	a	a	a	a	b	a	b	b	a	a	a	b	a	-	a	a	b	a	a	b	b	b
CABMR_01A17	33.305	b	a	a	a	b	a	a	a	b	a	a	b	a	a	a	b	a	b	b	b	b	b	a	a	b	b	a	a	a	a	b	a	b	b	a	a	a	b	a	b	a	a	b	a	a	b	b	b
CABMR_03C15	33.305	b	a	a	a	b	a	a	a	b	a	a	b	a	a	a	b	a	b	b	b	b	b	a	a	b	b	a	a	a	a	b	a	b	b	a	a	a	b	a	b	a	a	b	a	a	b	b	b
ABMR_02D06	36.713	b	a	a	a	b	a	b	a	b	a	a	b	a	a	a	b	a	b	b	b	b	b	a	a	b	b	b	a	a	a	b	a	b	b	a	a	a	b	a	b	a	a	b	a	a	b	b	b
CABMR_03C01	36.713	b	a	a	a	b	a	b	a	b	a	a	b	a	a	a	b	a	b	b	b	b	b	a	a	b	b	b	a	a	a	b	a	b	b	a	a	a	b	a	b	a	a	b	a	a	b	b	b
CABMR_02A02	39.452	b	a	a	a	b	a	b	a	a	a	a	b	a	a	a	b	a	b	b	b	b	b	a	a	b	b	b	a	a	a	b	a	b	b	a	a	a	b	a	b	a	a	b	a	a	b	b	b
AHMR_13I16	39.452	b	a	a	a	b	a	b	a	a	a	a	b	a	a	a	b	a	b	b	b	b	b	a	a	b	-	b	a	a	a	b	a	b	b	a	a	a	b	a	b	a	a	b	a	a	b	b	b
AHMR_12G11	39.452	-	a	a	a	b	a	b	a	a	a	-	b	a	a	a	b	a	b	b	b	b	b	a	a	b	b	b	a	a	a	b	a	b	b	a	a	a	b	a	b	a	a	b	-	a	b	b	b
AHMR_12H08	39.452	b	a	a	a	b	a	b	-	a	a	a	b	a	a	a	b	a	b	b	b	b	b	a	a	b	b	-	a	a	a	b	-	b	b	-	a	a	b	a	b	a	a	b	a	a	b	-	b
CBBMR_16M02	44.976	b	a	a	a	b	a	b	a	a	a	a	b	a	a	a	b	a	b	b	b	b	b	a	a	b	a	b	a	a	a	b	a	a	b	a	a	a	b	a	b	a	a	b	a	a	b	b	a
CBHMR_15K10	44.976	b	a	a	a	b	a	b	a	a	a	a	b	a	a	a	b	a	b	b	b	b	b	a	a	b	a	b	a	a	a	b	a	a	b	a	a	a	b	a	b	a	a	b	a	a	b	b	a
CABMR_08I02	47.256	b	a	a	a	b	a	b	a	b	a	a	b	a	a	a	b	a	b	b	b	b	b	a	a	b	a	b	a	a	a	b	a	a	b	b	a	a	b	a	b	a	a	b	a	a	b	b	a
AEGTMpAT_814	47.256	b	a	a	a	b	a	b	a	b	a	a	b	a	a	a	b	a	b	b	b	b	b	a	a	b	a	b	a	a	a	b	a	a	b	b	a	a	b	a	b	a	a	b	a	a	b	b	a
CHMR_09K21	61.004	b	b	a	a	b	b	b	a	b	a	b	b	a	a	a	b	a	b	a	b	b	b	a	a	a	a	b	a	a	a	b	a	b	a	b	a	a	a	b	b	a	a	b	a	a	b	b	b
CBBMR_14E05	61.004	b	b	a	a	b	b	b	a	b	a	b	b	a	a	a	b	a	b	a	b	b	b	a	a	a	a	b	a	a	a	b	a	b	a	b	a	a	a	b	b	a	a	b	a	a	b	b	b
ABMR_03A20	61.004	b	b	a	a	b	b	b	a	b	a	b	b	a	a	a	b	a	b	a	b	b	b	a	a	a	a	b	a	a	a	-	a	b	a	b	a	a	a	b	b	a	a	b	a	a	b	b	b
ABMR_06P05	61.004	b	b	a	a	b	b	b	a	b	a	b	b	a	a	a	b	a	b	a	b	b	b	a	a	a	a	b	a	a	a	b	a	b	a	b	a	a	a	b	b	a	a	b	a	-	b	b	b
BBMR_16M23	61.004	b	b	a	a	b	b	b	a	b	a	b	b	a	a	a	b	a	b	a	b	b	b	a	a	a	a	b	a	a	a	b	a	b	a	b	a	a	a	b	b	a	a	b	a	a	b	b	b
AEGAMpAC_300	62.838	b	b	a	a	b	b	b	a	b	a	b	b	a	a	a	b	b	b	a	b	b	b	a	a	a	a	b	a	a	a	b	a	b	a	b	a	a	a	b	b	a	a	b	a	a	b	b	b
CAHMR_03A06	65.513	b	b	a	a	b	b	b	a	b	a	b	a	a	a	a	b	a	b	a	b	b	b	a	a	a	a	b	a	a	a	b	a	b	a	b	a	a	a	b	b	a	a	b	a	a	b	b	b
BHMR_11K07	65.513	b	b	a	a	b	b	b	a	b	a	b	a	a	a	a	b	a	b	a	b	b	b	a	a	a	a	b	a	a	a	b	a	b	a	b	a	a	a	b	b	a	a	-	a	a	b	b	b
AEGGMpCG_139	73.266	a	b	a	a	b	b	b	a	a	a	b	a	a	a	a	b	a	b	a	b	b	b	a	a	a	a	b	a	b	a	b	a	b	a	b	a	a	a	b	b	a	a	b	a	a	b	b	b
AHMR_16F19	73.266	a	b	a	a	b	b	b	a	a	a	b	a	a	a	a	b	a	b	a	b	b	b	a	a	a	a	b	a	b	a	b	a	b	a	b	a	a	a	b	b	a	a	b	a	a	b	-	b
AEGAMpAC_289	74.24	a	b	a	a	b	b	b	a	a	a	b	a	a	a	a	b	b	b	a	b	b	b	a	a	a	a	b	a	b	a	b	a	b	a	b	a	a	a	b	b	a	a	b	a	a	b	b	b
BEGAMpAC_290	74.24	a	b	a	a	b	b	b	a	a	a	b	a	a	a	a	b	b	b	a	b	b	b	a	a	a	a	b	a	b	a	b	a	b	a	b	a	a	a	b	b	a	a	b	a	a	b	b	b
ABMR_08H01	83.809	a	b	a	a	b	b	a	a	a	a	b	a	a	a	a	b	a	b	a	b	b	b	a	a	a	a	b	a	b	a	b	b	b	a	b	a	a	a	b	a	b	b	b	a	a	b	b	b
BEGAMpAG_141	85.17	a	b	a	a	b	b	a	a	a	a	b	a	a	a	a	b	b	b	a	b	b	b	a	a	a	a	b	a	b	a	b	b	b	a	b	a	a	a	b	a	b	b	b	a	a	b	b	b
ABMR_12D05	94.992	a	b	a	a	b	b	a	a	a	a	b	a	a	b	a	b	-	b	a	b	b	b	a	b	a	a	b	a	b	b	b	b	b	a	b	a	a	a	b	a	b	b	b	a	a	b	b	a
AEGAMpAG_515	94.992	a	b	a	a	b	b	a	a	a	a	b	a	a	b	a	b	b	b	a	b	b	b	-	b	a	a	b	a	b	b	b	b	b	a	b	a	a	a	b	a	b	b	b	a	a	b	b	a
CBHMR_14F15	96.738	a	b	a	a	b	b	a	a	a	a	b	a	a	b	a	b	b	b	a	b	b	b	a	b	a	a	b	a	b	b	b	b	b	a	b	b	a	a	b	a	b	b	b	a	a	b	b	a
CBHMR_10G18	96.738	a	b	a	a	b	b	a	a	a	a	b	a	a	b	a	b	b	-	a	b	b	b	a	b	a	a	b	a	b	b	b	b	b	a	b	b	a	a	b	a	b	b	b	a	a	b	b	a
AEGGMpCG_599	98.31	a	b	a	a	b	-	a	a	a	a	b	a	a	b	a	b	b	b	a	b	b	b	a	b	a	a	b	a	b	b	b	b	b	a	b	b	a	a	b	a	b	b	-	a	a	b	b	a
AHMR_14H12	98.31	a	b	a	a	b	b	a	a	a	a	b	a	a	b	a	b	-	b	a	b	b	b	a	b	a	a	b	a	-	b	b	b	b	a	b	b	a	a	-	a	b	b	b	a	a	b	b	a
AEATMpCG_600	101.117	a	b	a	a	b	b	a	a	b	a	b	a	a	b	a	b	b	b	a	b	b	b	a	b	a	a	b	a	b	b	a	b	b	-	b	b	a	a	b	a	b	b	b	a	a	b	b	a
BEATMpCG_607	101.957	a	b	a	a	b	b	a	a	b	a	b	a	a	b	a	b	b	b	a	b	b	b	a	b	a	a	b	a	b	b	a	b	b	-	b	b	a	a	a	a	b	b	b	a	-	b	b	a
AEGAMpAG_276	102.427	a	b	a	a	b	b	a	a	b	a	b	a	a	b	a	b	b	b	a	b	b	b	a	b	a	a	b	a	b	b	a	b	b	a	b	b	a	a	b	a	b	b	b	a	a	b	b	a
BEATMpCG_642	103.795	a	b	a	a	b	b	a	a	b	a	b	a	a	b	b	b	b	b	a	b	b	b	a	b	a	a	b	a	b	b	a	b	b	-	b	b	a	a	a	a	b	b	b	a	-	b	b	a
ABMR_05H15	104.409	a	b	a	a	b	b	a	a	b	a	b	a	a	b	b	b	b	b	a	b	b	b	a	b	a	a	b	a	b	b	a	b	b	a	b	b	a	a	b	a	b	b	b	a	a	b	b	a
AEGTMpAT_330	104.409	a	b	a	a	b	b	a	a	b	a	b	a	a	b	b	b	b	b	a	b	b	b	a	b	a	a	b	a	b	b	a	b	b	a	b	b	a	a	b	a	b	b	b	a	a	b	b	a
BEATMpAG_258	104.409	a	b	a	a	b	b	a	a	b	a	b	a	a	b	b	b	b	b	a	b	b	b	a	b	a	a	b	a	b	b	a	b	b	a	b	b	a	a	b	a	b	b	b	a	a	b	b	a
BEGGMpAT_577	104.409	a	b	a	a	b	b	a	a	b	a	b	a	a	b	b	b	b	b	a	b	b	b	a	b	a	a	b	a	b	b	a	b	b	a	b	b	a	a	b	a	b	b	b	a	a	b	b	a
CBHMR_09M13	104.409	a	b	a	a	b	b	a	a	b	a	b	a	a	b	b	b	b	b	a	b	b	b	a	b	a	a	b	a	b	b	a	b	b	a	b	b	a	a	b	a	b	b	b	a	a	b	b	a
ABMR_10H05	104.409	a	b	a	a	b	b	-	a	b	a	b	a	a	b	b	b	b	b	a	b	b	b	a	b	a	a	b	a	b	b	a	b	b	a	b	b	a	a	b	a	b	b	b	a	a	b	b	a
CBHMR_12B09	104.409	a	b	a	a	b	b	a	a	b	a	b	a	a	b	b	b	b	b	a	b	b	b	a	-	a	a	b	a	b	b	a	b	b	a	b	b	a	a	b	a	b	b	b	a	a	b	b	a
AHMR_08E23	104.409	a	b	a	a	b	b	a	a	b	a	b	a	a	b	b	b	-	-	a	b	b	b	a	b	a	a	-	a	-	b	a	b	-	a	b	b	a	a	b	a	b	b	b	a	a	b	b	a
AEATMpAG_514	105.015	a	b	a	a	b	b	a	a	b	a	b	a	a	b	b	b	b	b	a	b	b	b	b	b	a	a	b	a	b	b	a	b	b	-	b	b	a	a	b	a	b	b	b	a	a	b	b	a
AEGAMpAC_513	106.243	a	b	a	a	b	b	a	a	b	a	b	a	a	b	b	b	b	b	a	b	b	b	a	b	a	a	b	a	b	b	a	b	-	a	a	a	a	a	b	a	b	b	b	a	a	b	b	a
CBHMR_13J08	106.886	a	b	a	a	b	b	a	a	b	a	b	a	a	a	b	b	b	b	a	b	b	b	a	b	a	a	b	a	b	b	a	b	b	a	b	b	a	a	b	a	b	b	b	a	a	b	b	a
CABMR_01K22	108.487	a	a	a	a	b	b	a	a	b	a	b	a	a	a	b	b	b	b	a	b	b	b	a	b	a	a	b	a	b	b	a	b	b	a	b	b	a	a	b	a	b	b	b	a	a	b	b	a
ABMR_03M24	108.487	a	a	a	a	b	b	a	a	b	a	b	a	a	a	b	b	b	b	a	b	b	b	a	b	a	a	b	a	b	b	a	b	b	a	b	b	a	a	b	a	b	b	b	a	a	b	b	a
ABMR_04L21	111.968	a	a	a	a	b	b	a	a	b	a	a	a	a	a	b	b	b	b	a	b	b	b	a	b	b	a	b	a	b	b	a	b	b	a	b	b	a	a	b	a	b	b	b	a	a	b	b	a
ABMR_07A16	111.968	a	a	a	a	b	b	a	a	b	a	a	a	a	a	b	b	b	b	a	b	b	b	a	b	b	a	b	a	b	b	a	b	b	a	b	b	a	a	b	a	b	b	b	a	a	b	b	a
ABMR_12O21	111.968	a	a	a	a	b	b	a	a	b	a	a	a	a	a	b	b	b	b	a	b	b	b	a	b	b	a	b	a	b	b	a	b	b	a	b	b	a	a	b	a	b	b	b	a	a	b	b	a
ABMR_13A09	111.968	a	a	a	a	b	b	a	a	b	a	a	a	a	a	b	b	b	b	a	b	b	b	a	b	b	a	b	a	b	b	a	b	b	a	b	b	a	a	b	a	b	b	b	a	a	b	b	a
ABMR_13M15	111.968	a	a	a	a	b	b	a	a	b	a	a	a	a	a	b	b	b	b	a	b	b	b	a	b	b	a	b	a	b	b	a	b	b	a	b	b	a	a	b	a	b	b	-	a	a	b	b	a
CAHMR_06D05	116.884	a	a	a	a	b	b	a	a	b	a	a	a	a	a	b	a	b	b	a	b	b	b	a	b	b	a	b	a	b	b	a	b	b	a	b	b	a	a	b	a	b	b	b	a	a	b	b	a
CBBMR_09B23	123.682	a	a	a	a	b	b	a	a	b	a	a	a	a	a	b	a	b	b	a	b	b	b	a	b	b	a	b	a	b	b	a	b	b	a	b	b	b	a	b	a	b	b	b	b	a	b	b	a
BEGGMpCG_81	129.669	a	a	a	a	b	b	a	a	b	a	a	a	a	a	b	b	b	b	a	b	a	a	a	b	b	a	b	a	b	b	a	b	b	a	b	b	b	a	a	a	b	b	b	b	a	b	b	-
CABMR_05H23	131.573	a	a	a	a	b	b	a	a	b	a	a	a	a	a	b	a	b	b	a	b	a	a	a	b	b	a	b	a	b	b	a	b	b	a	b	b	b	a	b	a	b	b	b	b	a	b	b	a
ABMR_08F01	131.573	a	a	a	a	b	b	a	a	b	a	a	a	a	a	b	a	b	b	a	b	a	a	a	b	b	a	b	a	b	b	a	b	b	a	b	b	b	a	b	a	b	b	b	b	a	b	b	a
BEGAMpAC_134	134.201	a	a	a	a	b	b	a	a	b	a	a	a	a	a	b	a	a	b	a	b	a	a	a	b	b	a	b	a	b	b	a	b	b	a	b	b	b	a	b	a	b	b	b	b	a	b	b	a
ABMR_05P21	156.575	b	a	b	a	b	b	a	a	b	a	a	a	a	b	a	a	b	b	a	b	a	a	a	b	b	a	b	a	b	b	b	b	b	b	b	a	b	b	a	b	b	b	a	b	b	b	b	a
ABMR_07H18	156.575	b	a	b	a	b	b	a	a	b	a	a	a	a	b	a	a	b	b	a	b	a	a	a	b	b	a	b	a	b	b	b	b	b	b	b	a	b	b	a	b	b	b	a	b	b	b	b	a
ABMR_11P08	156.575	b	a	b	a	b	b	a	a	b	a	a	a	a	b	a	a	b	b	a	b	a	a	a	b	b	a	b	a	b	b	b	b	b	b	b	a	b	b	a	b	b	b	a	b	b	b	b	a
AHMR_06O18	156.575	b	a	b	a	b	b	a	a	b	a	a	a	a	b	a	a	b	b	a	b	a	a	a	b	b	a	b	a	b	b	b	b	b	b	b	a	b	b	a	b	b	b	a	b	b	b	b	a
BEATMpAG_336	156.575	b	a	b	a	b	b	a	a	b	a	a	a	a	b	a	a	b	b	a	b	a	a	a	b	b	a	b	a	b	b	b	b	b	b	b	a	b	b	a	b	b	b	a	b	b	b	b	a
AHMR_02I24	156.575	b	a	b	a	b	b	a	a	b	a	a	a	a	b	a	a	b	b	a	b	a	a	a	b	b	a	b	a	b	b	b	b	b	b	b	a	b	b	a	b	b	b	a	b	b	b	b	a
AHMR_05D22	156.575	b	a	b	a	b	b	a	a	b	a	a	a	a	b	a	a	b	b	a	b	a	a	a	b	b	a	b	a	b	b	b	b	b	b	b	-	b	b	a	b	b	b	a	b	b	b	b	a
AHMR_16O10	156.575	b	a	b	a	b	b	a	a	b	a	a	a	a	b	a	a	b	b	a	b	a	a	a	-	b	a	b	a	b	b	b	b	b	b	b	a	b	b	a	b	b	b	a	b	b	b	b	a
AEATMpAG_155	156.575	b	a	b	a	b	b	a	a	b	a	a	a	a	b	a	a	b	b	a	b	a	a	a	b	b	a	b	a	b	b	b	b	b	b	b	a	b	b	a	b	b	-	a	b	b	b	b	a
ABMR_03J01	160.124	b	a	b	a	b	b	a	b	b	a	a	a	a	b	a	a	b	b	a	b	a	a	a	b	b	a	b	a	b	b	b	b	b	b	b	a	b	b	a	b	b	b	a	b	b	b	b	a
ABMR_06J06	160.124	b	a	b	a	b	b	a	b	b	a	a	a	a	b	a	a	b	b	a	b	a	a	a	b	b	a	b	a	b	-	b	b	b	b	b	a	b	b	a	b	b	b	a	b	b	b	b	a
group 4+17
BEGGMpCG_469	0	a	b	b	b	b	a	b	a	a	a	b	b	b	a	b	a	b	b	a	a	a	b	a	b	a	a	b	a	a	a	b	a	a	b	b	b	b	a	b	b	b	a	a	b	a	a	a	b
AHMR_01J15	1.754	a	b	b	b	b	a	b	a	a	a	b	b	b	a	b	a	b	b	a	a	a	b	a	b	a	a	b	a	a	a	b	a	a	b	b	b	b	a	b	b	b	a	a	b	a	a	a	b
AHMR_02K06	1.754	a	b	b	b	b	a	b	a	a	a	b	b	b	a	b	a	b	b	a	a	a	b	a	b	a	a	b	a	a	a	b	a	a	b	b	b	b	a	b	b	b	a	a	b	a	a	a	b
AHMR_10C07	1.754	a	b	b	b	b	a	b	a	a	a	b	b	b	a	b	a	-	-	a	a	a	b	a	b	a	a	b	a	a	a	b	a	a	-	-	b	b	a	-	b	-	a	a	b	a	a	a	b
ggc-0003B	1.754	a	b	b	b	b	a	b	a	-	a	b	-	b	a	b	a	b	b	a	a	a	b	a	b	a	a	b	a	a	a	b	a	a	b	b	b	b	a	b	b	b	-	a	b	a	a	a	b
AEGAMpAC_176	2.451	a	b	b	b	b	a	b	a	a	a	b	b	b	a	b	a	a	b	a	a	a	b	a	b	a	a	b	a	a	a	b	a	a	b	b	b	b	a	b	b	b	a	a	b	a	a	a	b
CBHMR_15H04	4.063	a	b	b	b	b	a	b	a	a	a	b	b	b	a	b	a	b	b	a	a	a	b	a	b	b	a	b	a	a	a	b	a	a	b	b	b	b	a	b	b	b	a	a	b	a	a	a	b
BBMR_12K09	9.169	a	b	b	a	b	a	a	a	a	a	b	b	b	a	b	a	b	b	a	a	a	b	a	b	b	a	b	a	a	a	b	a	b	b	b	b	b	a	b	b	b	a	a	b	a	a	a	b
CBHMR_14N21	9.169	a	b	b	a	b	a	-	a	a	a	b	b	b	a	b	a	b	b	a	a	a	b	a	b	b	a	b	a	a	a	b	a	b	b	b	b	b	a	b	b	b	a	a	b	a	a	a	b
AEGAMpAC_263	14.836	a	b	b	a	b	a	a	a	b	a	b	b	b	a	b	a	a	b	a	a	a	b	a	b	b	a	b	a	a	a	b	a	b	b	b	b	b	a	b	b	b	a	a	b	b	a	a	b
AHMR_07D10	15.844	a	b	b	a	b	a	a	a	b	a	b	b	b	a	b	a	b	b	a	a	a	b	a	b	b	a	b	a	a	a	b	a	b	b	b	b	b	a	b	b	b	a	a	b	b	a	a	b
CAHMR_07L16	15.844	a	b	b	a	b	a	a	a	b	a	b	b	b	a	b	a	b	b	a	a	a	b	a	b	b	a	b	a	a	a	b	a	b	b	b	b	b	a	b	b	b	a	a	b	b	a	a	b
CAHMR_08D20	15.844	a	b	b	a	b	a	a	a	b	a	b	b	b	a	b	a	b	b	a	a	a	b	a	b	b	a	b	a	a	a	b	a	b	b	b	b	b	a	b	b	b	a	a	b	b	a	a	b
CBBMR_15K01	15.844	a	b	b	a	b	a	a	a	b	a	b	b	b	a	b	a	b	b	a	a	a	b	a	b	b	a	b	a	a	a	b	a	b	b	b	b	b	a	b	b	b	a	a	b	b	a	a	b
BBMR_16E15	15.844	a	b	b	a	b	a	a	a	b	a	b	b	b	a	b	a	b	b	a	a	a	b	a	b	b	a	b	a	a	a	b	a	b	b	b	b	b	a	b	b	b	a	a	b	b	a	a	b
ct-0005	15.844	a	b	b	a	b	a	a	a	b	a	b	b	b	a	b	a	b	b	a	a	a	b	a	b	b	a	b	a	a	a	b	a	b	b	b	b	b	a	b	b	b	a	a	b	b	a	a	b
BEGTMpAT_651	16.548	a	b	b	a	b	a	a	a	b	a	b	b	b	a	b	a	b	b	a	a	a	b	a	b	b	a	b	a	a	a	b	a	b	b	b	b	b	a	a	b	b	a	a	b	b	a	a	b
ac-0001	19.478	a	b	b	a	b	a	a	a	b	a	b	b	b	a	b	a	-	b	a	a	a	b	a	b	b	a	b	a	a	a	b	a	b	b	b	b	b	a	b	b	b	a	a	b	b	a	a	b
AHMR_08J09	21.175	a	b	b	a	b	a	a	a	b	a	b	b	b	a	b	a	-	a	a	a	a	b	a	b	b	a	b	a	a	a	b	a	b	b	b	b	-	a	b	b	b	a	a	b	b	a	a	b
ABMR_09E02	28.214	a	b	b	a	b	a	a	a	b	a	b	a	b	a	b	a	b	a	a	a	a	b	a	b	b	a	b	a	b	a	b	a	b	b	a	b	b	a	b	b	b	a	a	a	b	a	a	b
ABMR_11F16	28.214	a	b	b	a	b	a	a	a	b	a	b	a	b	a	b	a	b	a	a	a	a	b	a	b	b	a	b	a	b	a	b	a	b	b	a	b	b	a	b	b	b	a	a	a	b	a	a	b
ABMR_16C07	28.214	a	b	b	a	b	a	a	a	b	a	b	a	b	a	b	a	b	a	a	a	a	b	a	b	b	a	b	a	b	a	b	a	b	b	a	b	b	a	b	b	b	a	a	a	b	a	a	b
ABMR_16P17	28.214	a	b	b	a	b	a	a	a	b	a	b	a	b	a	b	a	b	a	a	a	a	b	a	b	b	a	b	a	b	a	b	a	b	b	a	b	b	a	b	b	b	a	a	a	b	a	a	b
CABMR_05O14	28.214	a	b	b	a	b	a	a	a	b	a	b	a	b	a	b	a	b	a	a	a	a	b	a	b	b	a	b	a	b	a	b	a	b	b	a	b	b	a	b	b	-	a	a	a	b	a	a	b
ABMR_13F23	28.214	a	b	b	a	b	a	a	a	b	a	b	a	b	a	b	a	b	a	a	a	a	b	a	b	b	a	b	a	b	a	b	a	b	b	a	b	b	a	-	b	b	a	a	a	b	a	a	b
AEGAMpCC_313	28.214	-	b	b	a	b	a	a	a	b	a	b	a	b	a	b	a	b	a	a	a	a	b	a	b	b	a	b	a	b	a	b	a	b	b	a	b	b	a	b	b	b	a	a	a	b	a	a	b
ABMR_09M09	28.214	a	b	b	a	b	a	a	a	b	a	b	a	b	a	b	a	b	a	a	a	a	b	a	b	b	a	b	a	b	a	b	a	b	b	a	b	b	a	b	b	b	a	a	a	-	a	a	b
ABMR_14L23	28.214	a	b	b	a	b	a	a	a	b	a	b	a	-	a	b	a	b	a	a	a	a	b	a	b	b	a	b	a	b	a	b	a	b	b	a	b	b	-	b	b	b	a	a	a	b	a	a	b
ABMR_15I16	28.214	a	b	b	a	b	a	a	a	b	a	b	a	b	a	-	a	b	a	a	a	a	b	a	b	b	a	b	a	b	a	b	a	b	b	a	b	b	a	b	b	b	a	a	a	b	a	a	b
CABMR_07A05	28.214	a	b	b	a	b	a	-	a	b	a	b	a	b	a	b	a	b	a	a	a	a	b	a	b	b	a	b	a	b	a	b	a	b	b	a	b	b	a	b	b	-	a	a	a	b	a	a	b
CAHMR_03H20	34.659	a	b	b	a	b	a	a	a	b	a	b	a	b	b	b	a	b	a	a	a	a	b	a	a	b	a	b	a	b	a	b	a	b	b	a	b	b	a	b	b	b	a	a	a	b	a	b	b
CAHMR_05G10	34.659	a	b	b	a	b	a	a	a	b	a	b	a	b	b	b	a	b	a	a	a	a	b	a	a	b	a	b	a	b	a	b	a	b	b	a	b	b	a	b	b	b	a	a	a	b	a	b	b
BBMR_13G12	34.659	a	b	b	a	b	a	a	a	b	a	b	a	b	b	b	a	b	a	a	a	a	b	a	a	b	a	b	a	b	a	b	a	b	b	a	b	b	a	b	b	b	a	a	a	b	a	b	b
CBHMR_13M05	34.659	a	b	b	a	b	a	a	a	b	a	b	a	b	b	b	a	b	a	a	a	a	b	a	a	b	a	b	a	b	a	b	a	b	b	a	b	b	a	b	b	b	a	a	a	b	a	b	b
CAHMR_03H24	34.659	a	b	b	a	b	a	a	a	b	a	b	a	b	b	b	a	b	a	a	a	a	b	a	a	b	a	b	a	b	a	b	a	b	b	a	b	b	a	b	b	b	a	a	a	b	a	b	b
BHMR_13H01	34.659	a	b	b	a	b	a	a	a	b	a	b	a	b	b	b	a	-	a	a	a	a	b	a	a	b	a	-	a	b	a	b	a	b	b	a	b	b	a	b	-	b	a	a	a	b	a	b	b
CBBMR_15L03	36.241	a	b	b	a	b	a	a	a	b	a	b	a	b	b	a	a	b	a	a	a	a	b	a	a	b	a	b	a	b	a	b	a	b	b	a	b	b	a	b	b	b	a	a	a	b	a	b	b
CBHMR_15F11	36.241	-	b	b	a	b	a	a	a	b	-	b	a	b	b	a	a	b	a	a	a	a	b	a	a	b	a	b	a	b	a	b	-	b	b	-	b	b	a	b	b	b	a	a	a	b	a	b	b
AHMR_06E02	45.582	a	b	a	a	b	b	a	a	b	b	b	a	b	b	a	a	b	a	b	a	a	b	a	a	b	a	b	a	b	a	b	a	b	a	a	b	b	a	b	b	b	a	a	b	b	a	b	b
AHMR_09L01	45.582	a	b	a	a	b	b	a	a	b	b	b	a	b	b	a	a	b	a	b	a	a	b	a	a	b	a	b	a	b	a	b	a	b	a	a	b	b	a	b	b	b	a	a	b	b	a	b	b
AHMR_10I07	45.582	a	b	a	a	b	b	a	a	b	b	b	a	b	b	a	a	b	a	b	a	a	b	a	a	b	a	b	a	b	a	b	a	b	a	a	b	b	a	b	b	b	a	a	b	b	a	b	b
AHMR_13K02	45.582	a	b	a	a	b	b	a	a	b	b	b	a	b	b	a	a	b	a	b	a	a	b	a	a	b	a	b	a	b	a	b	a	b	a	a	b	b	a	b	b	b	a	a	b	b	a	b	b
CABMR_06L14	58.973	a	b	a	a	b	b	a	b	b	b	a	a	a	b	a	a	b	a	b	a	b	a	a	a	b	a	b	a	b	a	b	a	b	a	a	b	b	b	b	a	a	b	a	b	b	a	b	b
CABMR_07I24	58.973	a	b	a	a	b	b	a	b	b	b	a	a	a	b	a	a	b	a	b	a	b	a	a	a	b	a	b	a	b	a	b	a	b	a	a	b	b	b	-	a	a	b	a	b	b	a	b	b
BEGAMpAG_483	60.255	a	b	a	a	-	b	a	b	b	b	a	a	a	b	a	a	a	a	b	a	b	a	a	a	b	a	b	a	b	a	b	a	b	a	a	b	b	b	b	a	a	b	a	b	b	a	b	b
CBHMR_12E16	61.405	a	b	a	a	b	b	a	b	b	b	a	a	a	b	a	a	b	a	b	a	b	a	a	a	b	a	b	a	b	a	b	a	b	a	a	b	b	b	b	a	a	b	a	b	b	a	b	b
AEGAMpCC_102	63.583	a	b	a	a	b	b	b	b	b	b	a	a	a	b	a	b	b	a	b	a	b	a	a	a	b	a	b	a	b	a	b	a	b	a	a	b	b	b	b	a	a	b	a	b	b	a	b	b
ABMR_15B20	65.444	a	b	a	a	b	b	a	b	b	b	a	a	a	b	a	a	b	a	b	a	b	a	a	a	b	a	b	a	b	a	b	a	b	a	a	b	b	b	b	a	a	b	a	b	b	a	b	b
AEGAMpCG_176	65.444	a	b	a	a	b	b	a	b	b	b	a	a	a	b	a	a	b	a	b	a	b	a	a	a	b	a	b	a	b	a	b	a	b	a	a	b	b	b	b	a	a	b	a	b	b	a	b	b
ABMR_05P16	65.444	a	b	a	a	b	b	a	b	b	b	a	a	a	b	a	a	b	a	-	a	b	a	a	a	b	a	b	a	b	a	b	a	b	a	a	b	b	b	b	a	a	b	a	-	b	a	b	b
AHMR_03G06	68.974	a	b	a	a	b	b	a	b	b	b	a	-	a	b	a	a	b	b	a	a	b	a	a	a	b	a	b	a	b	a	b	a	b	a	a	b	b	b	b	a	a	b	a	b	b	a	b	b
AEGGMpCG_170	70.143	a	b	a	a	b	b	a	b	b	b	a	a	a	b	a	a	b	b	a	a	b	a	a	a	b	a	b	a	b	a	b	a	a	a	a	b	b	b	b	a	a	b	a	b	b	a	b	b
AEGAMpCA_117	73.778	a	b	a	a	b	a	a	b	a	b	a	a	b	b	a	a	b	b	a	a	b	a	a	a	a	a	-	a	b	a	b	a	a	a	a	b	b	b	b	a	a	b	a	b	b	a	b	b
AEATMpCG_573	74.692	-	-	a	a	b	b	a	b	a	b	a	a	a	b	a	a	b	b	a	a	b	a	-	a	b	a	b	a	b	a	b	a	a	a	a	b	b	b	b	a	a	b	a	b	b	a	b	b
CABMR_01B03	75.341	a	b	a	a	b	b	a	b	a	b	a	a	a	b	a	a	b	b	a	a	b	a	a	a	b	a	b	a	b	a	b	a	a	a	a	b	b	b	b	a	a	b	a	b	b	a	b	b
CABMR_02J08	75.341	a	b	a	a	b	b	a	b	a	b	a	a	a	b	a	a	b	b	a	a	b	a	a	a	b	a	b	a	b	a	b	a	a	a	a	b	b	b	b	a	a	b	a	b	b	a	b	b
CABMR_03C23	75.341	a	b	a	a	b	b	a	b	a	b	a	a	a	b	a	a	b	b	a	a	b	a	a	a	b	a	b	a	b	a	b	a	a	a	a	b	b	b	b	a	a	b	a	b	b	a	b	b
CABMR_04I19	75.341	a	b	a	a	b	b	a	b	a	b	a	a	a	b	a	a	b	b	a	a	b	a	a	a	b	a	b	a	b	a	b	a	a	a	a	b	b	b	b	a	a	b	a	b	b	a	b	b
CBBMR_10G11	75.341	a	b	a	a	b	b	a	b	a	b	a	a	a	b	a	a	b	b	a	a	b	a	a	a	b	a	b	a	b	a	b	a	a	a	a	b	b	b	b	a	a	b	a	b	b	a	b	b
CBBMR_12J04	75.341	a	b	a	a	b	b	a	b	a	b	a	a	a	b	a	a	b	b	a	a	b	a	a	a	b	a	b	a	b	a	b	a	a	a	a	b	b	b	b	a	a	b	a	b	b	a	b	b
CBBMR_15L23	75.341	a	b	a	a	b	b	a	b	a	b	a	a	a	b	a	a	b	b	a	a	b	a	a	a	b	a	b	a	b	a	b	a	a	a	a	b	b	b	b	a	a	b	a	b	b	a	b	b
BEGAMpAG_508	75.341	a	b	a	a	b	b	a	b	a	b	a	a	a	b	a	a	b	b	a	a	b	a	a	a	b	a	b	a	b	a	b	a	a	a	a	b	b	b	b	a	a	b	a	b	b	a	b	b
tcc-0008	75.341	a	b	a	a	b	b	a	b	a	b	a	a	a	b	a	a	b	b	a	a	b	a	a	a	b	a	b	a	b	a	b	a	a	a	a	b	b	b	b	a	a	b	a	b	b	a	b	b
CBBMR_15D08	75.341	a	b	a	a	b	b	a	b	a	b	a	a	a	b	a	a	b	b	a	a	b	-	a	a	b	a	b	a	b	a	b	a	a	a	a	b	b	b	b	a	a	b	a	b	b	a	b	b
CBHMR_13C17	75.341	a	b	-	a	b	b	a	b	a	b	a	a	a	b	a	a	b	b	a	a	b	a	a	a	b	a	b	a	b	a	b	a	a	a	a	b	b	b	b	a	a	b	a	b	b	a	b	b
ABMR_01B01	75.341	a	b	a	a	b	b	a	b	a	b	a	a	a	b	a	a	b	-	a	a	b	a	a	a	b	a	b	a	b	a	b	a	a	a	a	b	b	b	b	a	a	b	a	b	b	a	-	-
AEGAMpAC_167	76.091	a	b	a	a	b	b	a	b	a	b	a	a	a	b	a	a	a	b	a	a	b	a	a	a	b	a	b	a	b	a	b	a	a	a	a	b	b	b	b	a	a	b	a	b	b	a	b	b
ABMR_06F05	77.121	a	b	a	a	b	b	a	b	a	b	a	a	b	b	a	a	b	b	a	a	b	a	a	a	b	a	b	a	b	a	b	a	a	a	a	b	b	b	b	a	a	b	a	b	b	a	b	b
AHMR_13O01	77.121	a	b	a	a	b	b	a	b	a	b	a	a	b	b	a	a	b	b	a	a	b	a	a	a	b	a	b	a	b	a	b	a	a	a	a	b	b	b	b	a	a	b	a	b	b	a	b	b
CAHMR_04B11	77.121	a	b	a	a	b	b	a	b	a	b	a	a	b	b	a	a	b	-	a	a	b	a	a	a	b	a	b	a	b	a	b	a	a	a	a	b	b	b	b	a	a	b	a	b	b	a	b	b
CBBMR_13E15	77.121	a	b	a	a	b	b	a	b	a	b	a	a	b	b	a	a	b	b	a	a	b	a	a	a	b	a	b	a	b	a	b	a	a	a	a	b	b	b	-	a	a	b	a	b	b	a	b	b
ABMR_01I13	80.152	a	b	a	a	b	b	a	b	a	b	a	a	b	b	a	a	a	b	a	a	b	a	a	a	b	a	b	a	b	a	b	a	a	a	a	b	b	b	b	a	a	b	a	b	b	a	b	b
ABMR_07D17	80.152	a	b	a	a	b	b	a	b	a	b	a	a	b	b	a	a	a	b	a	a	b	a	a	a	b	a	b	a	b	a	b	a	a	a	a	b	b	b	b	a	a	b	a	b	b	a	b	b
ABMR_09K19	80.152	a	b	a	a	b	b	a	b	a	b	a	a	b	b	a	a	a	b	a	a	b	a	a	a	b	a	b	a	b	a	b	a	a	a	a	b	b	b	b	a	a	b	a	b	b	a	b	b
AEGGMpAT_426	80.152	a	b	a	a	b	b	a	b	a	b	a	a	b	b	a	a	a	b	a	a	b	a	a	a	b	a	b	a	b	a	b	a	a	a	a	b	b	b	b	a	a	b	a	b	b	a	b	b
CAHMR_08A01	80.152	a	b	a	a	b	b	a	b	a	b	a	a	b	b	a	a	a	b	a	a	b	a	a	a	b	a	b	a	b	a	b	a	a	a	a	b	b	b	b	a	a	b	a	b	b	a	b	b
AHMR_11C18	80.152	a	b	a	a	b	b	a	b	a	b	a	a	b	b	a	a	a	b	a	a	b	a	a	a	b	a	b	a	b	a	b	a	a	a	a	b	b	b	b	a	a	b	a	b	b	a	b	b
AHMR_01K20	80.152	a	b	a	a	b	b	a	b	a	b	a	a	b	b	a	a	a	b	a	a	b	a	a	a	b	a	b	a	b	a	b	a	a	a	a	b	b	b	b	a	a	b	a	b	b	a	b	b
AHMR_08N09	80.152	a	b	a	a	b	b	a	b	a	-	a	a	b	b	a	a	a	b	a	a	b	a	a	a	b	a	b	a	b	a	b	a	a	a	a	b	b	b	b	a	a	b	a	b	b	a	b	b
AHMR_03M16	80.152	a	b	a	a	b	b	a	b	a	b	a	a	b	b	a	a	a	b	a	a	b	a	a	a	b	a	b	a	b	a	b	-	a	-	-	b	b	b	b	a	a	b	a	b	b	a	b	b
AHMR_06H22	80.152	a	b	a	a	b	b	a	b	a	-	a	a	b	b	a	a	a	b	a	a	b	a	a	a	b	a	-	a	b	a	b	a	a	a	a	b	-	b	-	a	a	b	a	b	b	a	b	b
ABMR_13K01	82.158	a	b	-	a	b	b	a	b	a	b	a	a	b	b	a	a	a	b	a	b	b	a	a	a	b	a	b	a	b	a	b	a	a	a	a	b	b	b	b	a	a	b	a	b	b	a	b	b
AEGAMpCC_292	83.563	a	b	a	a	b	b	a	b	a	b	a	a	b	b	a	a	a	b	a	b	a	a	a	a	b	a	b	a	b	a	b	a	a	a	a	b	b	b	b	a	a	b	a	b	b	a	b	b
BEGAMpCA_62	83.563	a	b	a	a	b	b	a	b	a	b	a	a	b	b	a	a	a	b	a	b	a	a	a	a	b	a	b	a	b	a	b	a	a	a	a	b	b	b	b	a	a	b	a	b	b	a	b	b
ABMR_03G21	85.245	a	b	a	a	b	b	a	b	a	b	a	a	b	b	a	a	a	b	a	b	a	a	a	a	b	a	b	a	b	a	b	a	a	a	a	b	b	b	b	a	a	b	a	b	b	a	b	b
ABMR_08B07	85.245	a	b	a	a	b	b	a	b	a	b	a	a	b	b	a	a	a	b	a	b	a	a	a	a	b	a	b	a	b	a	b	a	a	a	a	b	b	b	b	a	a	b	a	b	b	a	b	b
ABMR_10G06	85.245	a	b	a	a	b	b	a	b	a	b	a	a	b	b	a	a	a	b	a	b	a	a	a	a	b	a	b	a	b	a	b	a	a	a	a	b	b	b	b	a	a	b	a	b	b	a	b	b
ABMR_10I03	85.245	a	b	a	a	b	b	a	b	a	b	a	a	b	b	a	a	a	b	a	b	a	a	a	a	b	a	b	a	b	a	b	a	a	a	a	b	b	b	b	a	a	b	a	b	b	a	b	b
ABMR_14L12	85.245	a	b	a	a	b	b	a	b	a	b	a	a	b	b	a	a	a	b	a	b	a	a	a	a	b	a	b	a	b	a	b	a	a	a	a	b	b	b	b	a	a	b	a	b	b	a	b	b
CAHMR_08B05	85.245	a	b	a	a	b	b	a	b	a	b	a	a	b	b	a	a	a	b	a	b	a	a	a	a	b	a	b	a	b	a	b	a	a	a	a	b	b	b	b	a	a	b	a	b	b	a	b	b
CBBMR_16N02	85.245	a	b	a	a	b	b	a	b	a	b	a	a	b	b	a	a	a	b	a	b	a	a	a	a	b	a	b	a	b	a	b	a	a	a	a	b	b	b	b	a	a	b	a	b	b	a	b	b
AEGAMpAC_221	85.245	a	b	a	a	b	b	a	b	a	b	a	a	b	b	a	a	a	b	a	b	a	a	a	a	b	a	b	a	-	a	b	a	a	a	a	b	b	b	b	a	a	b	a	b	b	a	b	b
CBBMR_09M11	85.245	a	b	a	a	-	b	a	b	a	b	a	a	b	b	a	a	a	b	a	b	a	a	a	a	b	a	b	a	b	a	b	a	-	a	a	b	b	b	b	a	a	b	a	b	b	a	b	b
ABMR_07G20	86.389	a	b	b	a	b	b	a	b	a	b	a	a	b	b	a	a	a	b	a	b	a	a	a	a	b	a	b	a	b	a	b	a	a	a	a	b	b	b	b	a	a	b	a	b	b	a	b	b
CABMR_07M23	86.389	a	b	b	a	b	b	a	b	a	b	a	a	b	b	a	a	a	b	a	b	a	a	a	a	b	a	b	a	b	a	b	a	a	a	a	b	b	b	b	a	a	b	a	b	b	a	b	b
CAHMR_03P06	86.389	a	b	b	a	b	b	a	b	a	b	a	a	b	b	a	a	a	b	a	b	a	a	a	a	b	a	b	a	b	a	b	a	a	a	a	b	b	b	b	a	a	b	a	b	b	a	b	b
AHMR_13F07	86.389	a	b	b	a	b	b	a	b	a	b	a	a	b	-	a	a	a	b	a	b	a	a	a	a	b	a	b	a	b	a	b	a	a	a	a	b	b	b	b	a	a	b	a	b	b	a	b	b
AHMR_01O08	86.389	a	b	b	a	b	b	a	b	a	b	-	a	b	b	a	a	a	b	a	b	a	a	a	a	b	a	b	a	b	a	b	a	a	-	a	b	b	b	b	a	a	b	a	b	b	a	b	b
CAHMR_02G20	87.905	a	b	b	a	b	b	a	b	a	b	b	a	b	b	a	a	a	b	a	b	a	a	a	a	b	a	b	a	b	a	b	a	a	a	a	b	b	b	b	a	a	b	a	b	b	a	b	b
CAHMR_04F10	87.905	a	b	b	a	b	b	a	b	a	b	b	a	b	b	a	a	a	b	a	b	a	a	a	a	b	a	b	a	b	a	b	a	a	-	a	b	b	b	b	a	a	b	a	b	b	a	b	b
BEGGMpCG_103	89.238	a	b	a	a	b	b	a	b	a	b	b	a	b	b	a	a	a	b	a	b	a	a	a	a	b	a	b	a	b	a	b	a	a	b	a	b	b	b	b	a	a	b	a	b	b	a	b	b
CABMR_03F07	107.378	a	b	b	a	a	b	a	b	a	b	b	a	b	b	a	a	a	a	a	b	a	a	b	a	b	b	b	a	a	a	b	a	a	b	a	b	a	b	b	a	b	b	a	b	b	b	b	b
AEATMpAG_143	107.378	a	b	b	a	a	b	a	b	a	b	b	a	b	b	a	a	a	a	a	b	a	a	b	a	b	b	b	a	a	a	b	a	a	b	a	b	a	b	b	a	b	b	a	b	b	b	b	b
AEGAMpAG_314	107.378	a	b	b	a	a	b	a	b	a	b	b	a	b	b	a	a	a	a	a	b	a	a	b	a	b	b	b	a	a	a	b	a	a	b	a	b	a	b	b	a	b	b	a	b	b	b	b	b
CAHMR_03L03	107.378	a	b	b	a	a	b	a	b	a	b	b	a	b	b	a	a	a	a	a	b	a	a	b	a	b	b	b	a	a	a	b	a	a	b	a	b	a	b	b	a	b	b	a	b	b	b	b	b
AHMR_06G22	107.378	a	b	b	a	a	b	a	b	a	b	b	a	b	b	a	a	a	a	a	b	a	a	b	a	b	b	b	a	a	a	b	a	a	b	a	b	a	b	b	a	b	b	a	b	b	b	b	b
AHMR_06N21	107.378	a	b	b	a	a	b	a	b	a	b	b	a	b	b	a	a	a	a	a	b	a	a	b	a	b	b	b	a	a	a	b	a	a	b	a	b	a	b	b	a	b	b	a	b	b	b	b	b
AEATMpAG_362	107.378	a	b	b	a	a	b	a	b	a	b	b	a	b	b	a	a	a	a	a	b	a	a	b	a	b	b	b	a	a	a	b	a	a	b	a	b	a	b	b	a	b	-	a	b	b	b	b	b
BEATMpAG_391	109.914	a	b	a	a	a	b	a	b	a	b	b	a	b	b	a	a	a	a	a	b	a	a	b	a	b	b	b	a	a	a	b	a	a	b	a	b	a	b	a	a	b	b	a	b	b	b	b	b
ABMR_06P04	133.278	a	a	b	a	a	a	a	b	a	b	b	a	a	a	a	b	a	a	a	b	b	a	b	a	b	b	a	b	a	a	b	b	a	b	a	b	a	b	b	b	b	b	a	a	b	b	b	b
AHMR_10C13	133.278	a	a	b	a	a	a	a	b	a	b	b	a	a	a	a	b	a	a	a	b	b	a	b	a	b	b	a	b	a	a	b	b	a	b	a	b	a	b	b	b	b	b	a	a	b	b	b	b
ABMR_03D09	133.278	a	a	b	a	a	a	a	b	a	b	b	a	a	a	a	b	a	a	a	b	b	a	b	a	b	b	a	b	a	a	b	b	a	b	a	b	a	b	b	b	b	b	a	a	-	b	b	b
AHMR_02P13	133.278	a	a	b	a	a	a	a	b	a	b	b	a	a	a	a	b	a	a	a	b	b	a	b	a	b	b	a	b	a	a	b	b	a	b	a	b	a	b	b	b	b	-	a	a	b	b	b	b
CSTIE3	133.278	a	a	b	a	a	a	a	b	a	b	b	a	a	a	a	b	a	a	a	b	b	a	b	a	b	b	a	b	a	a	b	b	a	b	a	b	a	b	b	b	b	-	a	a	b	b	b	b
group 9
ABMR_04H23	0	a	a	a	a	a	b	a	b	b	a	b	a	a	a	a	b	a	a	b	a	a	a	b	b	b	a	b	a	a	b	a	b	a	b	a	b	b	a	a	b	a	b	a	b	a	b	b	b
BBMR_12K20	0	a	a	a	a	a	b	-	b	b	a	b	a	a	a	a	-	a	-	b	a	a	a	b	b	b	a	b	a	a	b	a	b	a	b	a	b	b	a	a	b	a	b	a	b	a	b	b	b
BHMR_15D22	0	a	a	a	a	a	b	a	b	b	a	-	a	a	a	a	b	a	a	b	a	a	a	b	b	b	a	b	a	-	b	-	b	a	b	a	b	b	a	a	b	a	b	a	b	a	b	b	b
BBMR_16L06	0	a	a	-	a	a	b	a	b	b	a	b	a	a	-	a	b	a	a	b	a	a	a	b	b	b	a	b	a	a	b	a	b	a	b	a	b	b	a	a	b	a	b	a	-	a	b	b	b
BBMR_11K06	0	a	a	a	a	a	b	-	b	b	a	b	-	-	a	a	b	a	a	b	a	a	a	b	b	b	a	b	a	a	b	a	b	a	b	a	b	b	a	a	b	a	b	a	b	a	b	b	b
BHMR_16H01	0	a	a	a	a	a	b	a	b	b	a	b	a	a	a	a	b	a	a	b	a	a	a	b	b	b	a	-	a	-	b	a	b	a	b	a	b	b	a	a	b	a	b	a	b	a	b	b	b
BHMR_10L23	0	a	a	a	a	a	b	a	b	b	a	b	a	a	-	a	b	a	a	b	a	a	a	b	b	b	a	b	a	a	b	a	b	a	b	a	b	b	a	a	b	a	b	a	b	a	b	b	b
BBMR_16I05	0	a	a	a	a	a	b	a	b	b	a	b	a	a	a	a	b	a	a	b	a	a	a	-	b	b	a	b	a	a	b	a	b	a	b	a	b	b	a	a	b	a	b	a	b	a	b	b	b
BBMR_16B02	0	a	a	a	a	a	b	a	b	b	a	b	a	a	a	a	b	a	a	b	a	a	a	b	b	b	a	b	a	a	b	-	b	a	b	a	b	b	a	a	b	a	b	a	b	a	b	b	b
BBMR_14M14	0	a	a	a	a	a	b	a	b	b	a	b	a	a	a	a	b	a	a	b	a	a	a	b	b	b	a	b	a	a	b	a	b	a	b	a	b	b	a	a	b	a	b	a	b	a	b	-	b
BBMR_12H19	0	a	a	a	a	a	b	a	b	b	a	b	a	a	-	a	b	a	a	b	a	a	a	b	b	b	a	b	a	a	b	a	b	a	b	a	b	b	a	a	b	a	b	a	b	a	b	b	b
BBMR_10D11	0	a	a	a	a	a	b	a	b	b	a	b	a	a	a	a	b	a	a	b	a	a	a	b	b	b	a	b	a	a	b	a	b	a	b	a	b	b	a	a	b	a	b	a	b	a	b	b	b
BBMR_09M06	0	a	a	a	a	a	b	a	b	b	a	b	a	a	a	a	b	a	a	b	a	a	a	b	b	b	a	b	a	a	b	a	b	a	b	a	b	b	a	a	b	a	b	a	b	a	b	b	b
AHMR_07M10	0	a	a	a	a	a	b	a	b	b	a	b	a	a	a	a	b	a	a	b	a	a	a	b	b	b	a	b	a	a	b	a	b	a	b	a	b	b	a	a	b	a	b	a	b	a	b	b	b
ABMR_15I22	0	a	a	a	a	a	b	a	b	b	a	b	a	a	a	a	b	a	a	b	a	a	a	b	b	b	a	b	a	a	b	a	b	a	b	a	b	b	a	a	-	a	b	a	b	a	b	b	b
ABMR_11O15	0	a	a	a	a	a	b	a	b	b	a	b	a	a	a	a	-	a	a	b	a	a	a	b	b	b	a	b	a	a	b	a	b	a	b	a	b	b	a	a	b	a	b	a	b	a	b	b	b
BHMR_12M11	0	a	a	a	a	a	b	a	b	b	a	b	a	a	a	a	b	a	a	b	a	a	a	b	b	b	a	b	a	a	b	a	b	a	b	a	b	b	a	a	b	a	b	a	b	a	b	b	b
BBMR_15L07	0	a	a	a	a	a	b	a	b	b	a	b	a	a	a	a	b	a	a	b	a	a	a	b	b	b	a	b	a	a	b	a	b	a	b	a	b	b	a	a	b	a	b	a	b	a	b	b	b
BBMR_15G01	0	a	a	a	a	a	b	a	b	b	a	b	a	a	a	a	b	a	a	b	a	a	a	b	b	b	a	b	a	a	b	a	b	a	b	a	b	b	a	a	b	a	b	a	b	a	b	b	b
BBMR_15A20	0	a	a	a	a	a	b	a	b	b	a	b	a	a	a	a	b	a	a	b	a	a	a	b	b	b	a	b	a	a	b	a	b	a	b	a	b	b	a	a	b	a	b	a	b	a	b	b	b
BBMR_13M17	0	a	a	a	a	a	b	a	b	b	a	b	a	a	a	a	b	a	a	b	a	a	a	b	b	b	a	b	a	a	b	a	b	a	b	a	b	b	a	a	b	a	b	a	b	a	b	b	b
BBMR_13A15	0	a	a	a	a	a	b	a	b	b	a	b	a	a	a	a	b	a	a	b	a	a	a	b	b	b	a	b	a	a	b	a	b	a	b	a	b	b	a	a	b	a	b	a	b	a	b	b	b
BBMR_13A03	0	a	a	a	a	a	b	a	b	b	a	b	a	a	a	a	b	a	a	b	a	a	a	b	b	b	a	b	a	a	b	a	b	a	b	a	b	b	a	a	b	a	b	a	b	a	b	b	b
BBMR_12L03	0	a	a	a	a	a	b	a	b	b	a	b	a	a	a	a	b	a	a	b	a	a	a	b	b	b	a	b	a	a	b	a	b	a	b	a	b	b	a	a	b	a	b	a	b	a	b	b	b
BBMR_12A21	0	a	a	a	a	a	b	a	b	b	a	b	a	a	a	a	b	a	a	b	a	a	a	b	b	b	a	b	a	a	b	a	b	a	b	a	b	b	a	a	b	a	b	a	b	a	b	b	b
BBMR_11J04	0	a	a	a	a	a	b	a	b	b	a	b	a	a	a	a	b	a	a	b	a	a	a	b	b	b	a	b	a	a	b	a	b	a	b	a	b	b	a	a	b	a	b	a	b	a	b	b	b
BBMR_10K02	0	a	a	a	a	a	b	a	b	b	a	b	a	a	a	a	b	a	a	b	a	a	a	b	b	b	a	b	a	a	b	a	b	a	b	a	b	b	a	a	b	a	b	a	b	a	b	b	b
BBMR_09A21	0	a	a	a	a	a	b	a	b	b	a	b	a	a	a	a	b	a	a	b	a	a	a	b	b	b	a	b	a	a	b	a	b	a	b	a	b	b	a	a	b	a	b	a	b	a	b	b	b
BBMR_09A19	0	a	a	a	a	a	b	a	b	b	a	b	a	a	a	a	b	a	a	b	a	a	a	b	b	b	a	b	a	a	b	a	b	a	b	a	b	b	a	a	b	a	b	a	b	a	b	b	b
ABMR_08F04	0	a	a	a	a	a	b	a	b	b	a	b	a	a	a	a	b	a	a	b	a	a	a	b	b	b	a	b	a	a	b	a	b	a	b	a	b	b	a	a	b	a	b	a	b	a	b	b	b
CABMR_07D04	0	a	a	a	a	a	b	a	b	b	a	b	a	a	a	a	b	a	a	b	a	a	a	b	b	b	a	b	a	a	b	a	b	a	b	a	b	b	a	a	b	a	b	a	b	a	b	b	b
CAHMR_05B20	4.151	a	a	a	a	a	b	a	b	b	a	b	a	a	a	a	b	-	a	b	a	a	a	b	b	b	a	b	a	a	b	a	b	a	b	a	b	b	a	a	b	a	b	a	b	a	b	b	b
CAHMR_08F16	4.151	a	a	a	a	a	b	a	b	b	a	b	a	a	a	a	b	b	a	b	a	a	-	b	b	b	a	b	a	a	b	a	b	a	b	a	b	b	a	a	b	a	b	a	b	a	b	b	b
BEGAMpAC_390	4.151	a	a	a	a	a	b	a	b	b	a	b	a	a	a	a	b	b	a	b	a	a	a	b	b	b	a	b	a	a	b	a	b	a	b	a	b	b	a	a	b	a	b	a	b	a	b	b	b
AHMR_13F19	8.075	a	a	a	a	a	b	a	b	b	a	b	a	a	a	b	b	b	a	b	a	b	a	b	b	b	a	b	a	a	b	a	b	a	b	a	b	b	a	a	b	a	b	a	b	a	b	b	b
CBHMR_15D24	14.017	a	a	a	a	a	b	a	b	b	a	b	a	a	a	b	b	b	a	b	a	b	a	b	b	a	a	b	a	a	b	a	b	a	-	a	b	b	a	-	b	a	b	a	b	a	b	b	b
ABMR_07M17	20.136	a	a	a	b	a	b	a	b	b	b	b	a	a	a	b	b	b	a	b	a	b	b	b	b	a	a	b	a	a	b	a	b	a	b	a	b	b	a	b	b	a	b	a	b	a	b	b	b
CBBMR_09I17	20.136	a	a	a	b	a	b	a	b	b	b	b	a	a	a	b	b	b	a	b	a	b	b	b	b	a	a	b	a	a	b	a	b	a	b	a	b	b	a	b	b	a	b	a	b	a	b	b	b
ABMR_07C14	31.176	a	a	a	b	a	b	a	b	b	b	b	a	a	a	b	b	b	b	a	a	b	b	b	b	a	a	b	a	a	b	a	b	a	b	b	a	b	a	b	b	a	b	a	b	a	b	b	b
AHMR_10O24*	32.994	a	a	a	b	a	b	a	b	b	b	b	a	a	a	b	b	b	b	a	a	b	b	b	b	a	b	b	a	a	b	a	b	a	b	b	a	b	a	b	b	a	b	a	b	a	b	b	b
AHMR_14L12*	32.994	a	a	a	b	a	b	a	b	b	b	b	a	a	a	b	b	b	b	a	a	b	b	b	b	a	b	b	a	a	b	a	b	a	b	b	a	b	a	b	b	a	b	a	b	a	b	b	b
CBHMR_09F14*	32.994	a	a	a	b	a	b	a	b	b	b	b	a	a	a	b	b	b	b	a	a	b	b	b	b	a	b	b	a	a	b	a	b	a	b	b	a	b	a	b	b	a	b	a	b	a	b	b	b
ABMR_04K14*	32.994	a	a	a	b	a	b	a	b	b	b	b	a	a	a	b	b	b	b	a	a	b	b	b	b	a	b	b	a	a	b	a	b	a	b	b	a	b	a	b	b	a	b	-	b	a	b	b	b
BEGGMpAT_142	34.811	a	a	a	b	a	b	a	b	b	b	b	a	a	a	b	b	b	b	a	a	b	b	b	b	a	b	b	a	a	b	a	b	a	b	b	a	b	a	b	b	a	b	a	b	a	b	b	b
BEGAMpCA_288*	41.459	a	a	a	b	a	b	b	a	b	b	b	a	a	b	b	b	b	b	a	a	b	b	b	b	b	b	b	a	a	b	a	a	a	b	b	a	b	a	b	b	a	b	a	b	a	b	b	b
CBHMR_09J13	42.39	a	a	a	b	a	b	b	a	b	b	b	a	a	b	b	b	b	b	a	a	b	b	b	b	a	b	b	a	a	b	a	a	a	b	b	a	b	a	b	b	a	b	a	b	a	b	b	b
AEGAMpCC_302*	42.39	a	a	a	b	a	b	b	a	b	b	b	a	a	b	b	b	b	b	a	a	b	b	b	b	a	b	b	a	a	b	a	-	a	b	b	a	b	a	b	b	a	b	a	b	a	b	b	b
AHMR_02F13	44.167	a	a	a	b	a	b	b	a	a	b	b	a	a	b	b	b	b	b	a	a	b	b	b	b	a	b	b	a	a	b	a	a	a	b	b	a	b	a	b	b	a	b	a	b	a	b	b	b
CAHMR_02J16	44.167	a	a	a	b	a	b	b	a	a	b	b	a	a	b	b	b	b	b	a	a	b	b	b	b	a	b	b	a	a	b	a	a	a	b	b	a	-	a	b	b	a	b	a	b	a	b	b	b
CAHMR_06A08	44.167	a	a	a	b	a	b	b	a	a	b	b	a	a	-	b	b	b	b	a	a	b	b	b	b	a	b	b	a	a	b	a	a	a	b	b	a	b	a	b	b	a	b	a	b	a	b	b	b
ABMR_02O17	45.261	a	a	a	b	a	b	b	a	a	b	b	a	a	b	b	b	b	b	a	a	b	b	b	b	a	b	b	a	a	b	a	a	a	b	b	a	b	a	b	b	a	b	a	a	a	b	b	b
ABMR_07N15	45.261	a	a	a	b	a	b	b	a	a	b	b	a	a	b	b	b	b	b	a	a	b	b	b	b	a	b	b	a	a	b	a	a	a	b	b	a	b	a	b	b	a	b	a	a	a	b	b	b
AEGCMpCA_320	49.161	a	a	a	b	a	b	b	a	a	b	b	a	a	b	b	b	b	b	a	a	b	b	b	b	a	b	a	b	a	a	a	a	a	b	b	a	b	a	b	b	a	b	a	a	a	b	b	b
AEGAMpCG_174	50.302	a	a	b	b	a	b	b	a	a	b	b	a	a	b	b	b	b	b	a	a	b	b	b	b	a	b	a	a	a	a	a	a	a	b	b	a	b	a	b	b	a	b	a	a	a	b	b	b
CABMR_07K05	51.336	a	a	b	b	a	b	b	a	a	b	b	a	a	b	b	b	b	b	a	a	b	b	b	b	a	b	a	a	a	a	a	a	a	b	b	a	b	a	b	b	b	b	a	a	a	b	b	b
ABMR_11D04	51.336	a	a	b	b	a	b	b	a	a	b	b	a	a	b	b	b	b	b	a	a	b	b	b	b	a	b	a	a	a	a	a	a	a	b	b	a	b	a	b	b	b	b	a	a	a	b	b	b
AHMR_01O19	51.336	a	a	b	b	a	b	b	a	a	b	b	a	a	b	b	b	b	b	a	a	b	b	b	b	a	b	a	a	a	a	a	a	a	b	b	a	b	a	b	b	b	b	a	a	a	b	b	b
AHMR_05O24	51.336	a	a	b	b	a	b	b	a	a	b	b	a	a	b	b	b	b	b	a	a	b	b	b	b	a	b	a	a	a	a	a	a	a	b	b	a	b	a	b	b	b	b	a	a	a	b	b	b
BEGCMpCA_120	51.336	a	a	b	b	a	b	b	a	a	b	b	a	a	b	b	b	b	b	a	a	b	b	b	b	a	b	a	a	a	a	a	a	a	b	b	a	b	a	b	b	b	b	a	a	a	b	b	b
AHMR_01K16	51.336	a	a	b	b	a	b	b	a	a	b	b	-	a	b	b	b	b	b	a	a	b	b	b	b	a	b	a	a	a	a	a	a	a	b	b	a	b	a	b	b	b	b	a	a	a	b	b	b
AHMR_02J07	51.336	a	a	b	b	a	b	b	a	a	b	b	a	a	-	b	b	b	b	a	a	b	b	b	b	a	b	a	a	a	a	-	a	a	b	b	a	b	a	b	b	b	b	a	a	a	b	b	b
CBBMR_09M23	52.66	a	a	b	b	a	b	b	a	a	b	b	a	a	b	b	b	b	b	a	a	b	b	b	b	a	b	a	a	a	a	a	a	a	b	b	a	b	a	b	b	b	b	a	a	a	b	a	b
CABMR_06A13	53.919	a	a	b	b	a	b	b	a	a	b	b	a	a	b	b	b	b	b	a	a	b	b	b	b	a	b	a	a	a	a	a	a	a	b	b	a	b	a	b	a	b	b	a	a	a	b	a	b
ABMR_03E19	53.919	a	a	b	b	a	b	b	a	a	b	b	a	a	b	b	b	b	b	a	a	b	b	-	b	a	b	a	a	a	a	a	a	a	b	b	a	b	a	b	a	b	b	a	a	a	b	a	b
AEGTMpAT_481	55.22	a	a	b	b	a	b	b	a	a	b	b	a	a	b	b	b	b	b	a	a	b	b	b	b	a	b	a	a	a	a	a	a	b	b	b	a	b	a	b	a	b	b	a	a	a	b	a	b
CBBMR_13N08	56.5	a	a	b	b	a	b	b	a	a	b	b	a	a	b	b	b	b	b	a	a	b	b	b	b	b	b	a	a	a	a	a	a	b	b	b	a	b	a	b	a	b	b	a	a	a	b	a	b
BHMR_16L07	56.5	a	a	b	b	a	b	b	a	a	b	b	a	a	b	b	b	b	b	a	a	b	b	b	b	b	b	a	a	a	a	a	a	b	b	b	a	b	a	b	a	b	b	a	a	a	b	a	b
CAHMR_07D15	56.5	a	a	-	b	a	b	b	a	a	b	b	a	a	b	b	b	b	b	a	a	b	b	b	b	b	b	a	a	a	a	a	a	b	b	b	a	b	a	b	a	b	b	a	a	a	b	a	b
AEATMpAG_208	59.931	a	a	b	b	a	b	b	a	a	b	b	a	a	b	b	b	b	b	a	a	b	b	b	b	b	b	a	a	a	a	a	a	b	b	b	a	b	a	b	a	a	b	a	b	a	b	a	b
BEGAMpCA_243	63.427	a	a	b	b	a	b	b	a	a	a	b	a	a	b	b	b	b	b	a	a	b	b	b	b	b	b	a	b	a	a	a	a	a	b	b	a	b	a	b	b	a	a	a	b	a	b	a	b
CABMR_01E01	65.337	a	a	b	b	a	a	b	a	a	a	b	a	a	b	b	b	b	b	a	a	b	b	b	b	a	b	a	b	a	a	a	a	a	b	b	a	b	a	b	b	a	a	a	b	a	b	a	b
ABMR_10D19	65.337	a	a	b	b	a	a	b	a	a	a	b	a	a	b	b	b	b	b	a	a	b	b	b	b	a	b	a	b	a	a	a	a	a	b	b	a	b	a	b	b	a	a	a	b	a	b	a	b
ABMR_05H22	65.772	a	a	b	b	a	a	b	a	a	a	b	a	a	b	b	b	b	b	a	a	b	b	b	b	a	b	a	b	a	a	a	a	a	b	b	a	b	a	b	b	a	a	a	b	a	b	b	b
AHMR_11A21	65.772	a	a	b	b	a	a	b	a	a	a	b	a	a	b	b	b	b	b	a	a	b	b	b	b	a	b	a	b	a	a	a	a	a	b	b	a	b	a	b	b	a	a	a	b	a	b	b	b
CBHMR_12L06	65.772	a	a	b	b	a	a	b	a	a	a	b	a	a	b	b	b	b	b	a	a	b	b	b	b	a	b	a	b	a	a	a	a	a	b	b	a	b	a	b	b	a	a	a	b	a	b	b	b
ABMR_02D20	65.772	a	a	b	b	a	a	b	a	a	a	b	a	a	b	b	b	-	b	a	a	b	b	b	b	a	b	a	b	a	a	a	a	a	b	b	a	b	a	b	b	a	a	a	b	a	b	b	b
AHMR_13P12	65.772	a	a	b	b	a	a	b	a	a	a	b	a	a	b	b	b	b	b	a	a	b	b	b	-	a	b	a	b	a	a	a	a	a	b	b	a	b	a	b	b	a	a	a	b	a	b	b	b
BEGAMpCC_253	69.379	a	a	a	b	a	a	b	a	a	a	b	a	a	b	b	b	a	b	a	a	b	b	b	b	a	b	a	b	a	a	a	a	a	b	b	a	b	a	a	b	a	a	a	b	-	b	b	b
AEGAMpCG_85	74.739	a	a	a	b	a	a	b	a	a	a	b	b	a	b	b	b	a	b	a	a	b	b	a	b	a	b	a	b	a	a	a	a	a	b	b	b	b	a	a	b	a	a	a	b	a	b	b	b
AEGAMpAG_199	79.85	a	a	a	b	a	a	b	a	a	a	b	b	a	b	b	b	b	b	a	a	b	b	a	b	a	b	a	b	a	a	a	a	a	b	b	b	b	a	a	b	a	a	a	b	a	b	b	a
BEGAMpAG_208	81.586	b	a	a	b	a	a	b	a	a	a	b	b	a	b	b	b	b	b	a	a	b	b	a	b	a	b	a	b	a	a	a	a	a	b	b	b	b	a	a	b	a	a	a	b	a	b	b	a
BEGAMpCA_278	88.854	b	a	a	b	a	a	a	a	a	b	b	b	a	b	b	b	a	b	a	a	b	b	a	-	b	b	-	b	a	a	a	b	a	b	b	b	b	a	a	b	a	a	a	b	a	b	b	a
CAHMR_06G09	91.632	b	a	a	b	b	a	a	a	a	b	b	b	a	b	b	b	a	b	a	a	b	b	a	a	a	b	a	b	a	a	a	b	a	b	b	b	b	a	a	b	a	a	a	b	a	b	b	a
AHMR_07O20	91.632	b	a	a	b	b	a	a	a	a	b	b	b	a	b	b	b	a	b	a	a	b	b	a	a	a	b	a	b	a	a	a	b	a	b	b	b	b	a	a	b	a	a	a	b	a	b	b	a
BEGAMpCC_68	91.632	b	a	a	b	b	a	a	a	a	b	b	b	a	b	b	b	a	b	a	a	b	b	a	a	a	b	a	b	a	a	a	b	a	b	b	b	b	a	a	b	a	a	a	b	a	b	b	a
AHMR_04J02	91.632	b	a	-	b	b	a	a	a	a	b	b	b	a	b	b	b	a	b	a	a	b	b	a	a	a	b	a	b	a	a	a	b	a	b	b	b	b	a	a	b	a	a	a	b	a	b	b	a
AHMR_05N15	91.632	b	a	a	b	b	a	a	a	a	b	b	b	a	b	b	b	-	b	a	a	b	b	a	a	a	b	a	b	a	a	a	b	a	b	b	b	b	a	a	b	a	a	a	b	a	b	b	a
CAHMR_07F21	91.632	b	a	a	b	b	a	a	a	a	b	b	b	a	b	b	b	a	b	a	a	b	b	a	-	a	b	a	b	a	a	a	b	a	b	b	b	b	a	a	b	a	a	a	b	a	b	b	a
AHMR_16F08	91.632	b	a	a	b	b	a	a	a	a	b	b	b	a	b	b	b	a	b	a	a	b	b	a	a	a	b	a	b	a	a	a	b	a	b	b	b	b	a	a	b	a	a	-	b	a	b	b	a
AHMR_03O14	91.632	b	a	a	b	b	a	a	a	a	b	b	b	a	b	b	b	a	b	a	a	b	b	a	a	a	b	a	b	a	a	a	b	a	b	-	b	b	a	-	b	a	a	a	b	a	b	b	a
CAHMR_07P11	91.632	b	a	a	b	b	a	a	a	a	b	b	b	a	b	b	-	a	b	a	a	b	b	a	a	a	b	a	b	a	a	a	-	a	b	-	b	b	a	a	b	a	a	a	b	a	b	b	a
BEATMpAG_263	93.161	b	a	a	b	b	a	a	a	a	b	b	b	a	b	b	b	a	b	a	a	b	b	a	a	a	b	a	b	a	a	a	b	a	b	b	b	b	a	a	b	a	b	a	b	a	b	b	a
group 7
BEGGMpAT_288	0	a	a	b	b	a	b	a	a	a	a	b	b	a	b	-	b	b	b	a	a	a	a	b	a	b	a	a	a	a	b	b	a	b	a	a	b	a	a	a	a	a	a	b	a	b	b	b	a
AHMR_10F19	11.924	a	a	b	b	a	a	a	b	a	a	b	b	a	b	a	b	b	a	b	a	a	a	b	a	b	a	a	a	a	b	b	a	b	a	a	b	a	a	a	a	a	a	b	a	a	b	b	b
AHMR_16I22	11.924	a	a	b	b	a	a	a	b	a	a	b	b	a	b	a	b	b	a	b	a	a	a	b	a	b	a	a	a	a	b	b	a	b	a	a	b	a	a	a	a	a	a	b	a	a	b	b	b
BBMR_09L07	15.334	a	a	b	b	a	a	a	b	a	a	b	a	a	b	a	b	b	a	b	a	a	a	b	a	b	a	a	a	a	b	b	a	b	a	a	b	a	b	a	a	a	a	b	a	a	b	b	b
CAHMR_03J23	15.334	a	a	b	b	a	a	a	b	-	a	b	a	a	b	a	b	b	a	b	a	a	a	b	a	b	a	a	a	a	b	b	a	b	a	a	b	a	b	a	a	a	a	b	a	a	b	b	b
CAHMR_08O04	15.334	a	a	b	b	a	a	a	b	a	a	b	a	a	b	a	b	b	a	b	a	a	a	b	a	b	a	a	a	a	b	b	a	b	a	a	b	a	b	a	a	a	a	b	a	a	b	b	b
ABMR_05B13	20.454	a	a	b	b	a	a	a	b	a	a	b	a	a	b	a	b	b	a	b	a	a	a	b	b	b	a	b	a	a	b	b	a	b	a	a	b	a	b	a	a	a	a	b	a	a	b	b	b
ABMR_13F03	20.454	a	a	b	b	a	a	a	b	a	a	b	a	a	b	a	b	b	a	b	a	a	a	b	b	b	a	b	a	a	b	b	a	b	a	a	b	a	b	a	a	a	a	b	a	a	b	b	b
BHMR_14C03	20.454	a	a	b	b	a	a	a	b	a	a	b	a	a	b	a	b	b	a	b	a	a	a	b	b	b	a	b	a	a	b	b	a	b	a	a	b	-	b	a	a	-	a	b	a	a	b	b	b
ABMR_13K08	23.977	a	a	b	b	a	a	a	b	a	a	b	a	a	b	a	b	b	a	b	a	a	a	b	b	b	a	b	a	a	a	b	a	b	a	a	b	a	b	a	a	a	a	b	a	a	b	b	b
CBBMR_12I02	23.977	a	a	b	b	a	a	a	b	a	a	b	a	a	b	a	b	b	a	b	a	a	a	b	b	b	a	b	a	a	a	b	a	b	a	a	b	a	b	a	a	a	a	b	a	a	b	b	b
CBBMR_14J14	23.977	a	a	b	b	a	a	a	b	a	a	b	a	a	b	a	b	b	a	b	a	a	a	b	b	b	a	b	a	a	a	b	a	b	a	a	b	a	b	a	a	a	a	b	a	a	b	b	b
CBBMR_16K24	23.977	a	a	b	b	a	a	a	b	a	a	b	a	a	b	a	b	b	a	b	a	a	a	b	b	b	a	b	a	a	a	b	a	b	a	a	b	a	b	a	a	a	a	b	a	a	b	b	b
CBBMR_11N22	31.309	a	a	b	b	a	a	a	b	a	a	b	a	a	b	a	b	b	b	a	a	a	a	b	b	a	b	b	a	a	a	b	a	b	a	a	b	a	b	a	a	a	a	b	a	a	b	a	b
AHMR_02K09	32.505	a	a	b	b	a	a	a	b	a	b	b	a	a	b	a	b	b	b	-	a	a	a	b	b	a	a	b	a	a	a	b	a	b	a	a	b	a	b	a	a	a	a	b	a	a	b	a	b
tcc-0009	33.629	a	a	b	b	a	a	a	b	a	b	b	a	a	b	a	b	b	b	a	a	a	a	b	b	a	b	b	a	a	a	b	a	b	a	a	b	a	b	a	a	a	-	b	a	a	b	a	b
AEGGMpCG_209	33.629	a	a	b	b	a	a	a	b	a	b	b	a	a	b	a	b	b	b	a	a	a	a	b	b	a	b	b	a	a	a	b	a	b	a	a	b	a	b	a	a	a	a	-	a	a	b	a	-
CBBMR_11B02	44.971	a	a	-	b	a	a	a	b	a	b	b	a	a	a	a	a	b	b	a	a	a	b	b	b	a	b	b	-	a	a	b	a	b	a	a	b	b	b	a	a	b	a	-	b	a	b	a	b
CABMR_07O23	47.035	a	a	b	b	a	a	a	b	a	b	b	a	a	a	a	a	b	b	a	a	a	b	b	b	a	b	b	a	a	a	b	a	b	a	a	b	b	b	a	b	b	a	a	b	a	b	a	b
ABMR_13M03	47.035	a	a	b	b	a	a	a	b	a	b	b	a	a	a	a	a	b	b	a	a	a	b	b	b	a	b	b	a	a	a	b	a	b	a	a	b	b	b	a	b	b	a	a	b	a	b	a	b
AEGAMpAG_137	47.035	a	a	b	b	a	a	a	b	a	b	b	a	a	a	a	a	b	b	a	a	a	b	b	b	a	b	b	a	a	a	b	a	-	a	a	b	b	b	a	b	b	a	a	b	a	b	a	b
CAHMR_01K12	47.035	a	a	b	b	a	a	a	b	a	b	b	a	a	a	a	a	b	b	a	a	a	b	b	b	a	b	b	a	a	a	b	a	b	a	a	b	b	b	a	b	b	a	a	b	a	b	a	-
CAHMR_08E12	47.035	a	a	b	b	a	a	a	b	a	b	b	a	a	a	a	a	b	-	a	a	a	b	b	b	a	b	b	a	a	a	b	a	b	a	a	b	b	b	a	b	-	a	a	b	a	b	a	b
ABMR_03K06	48.543	a	a	b	b	a	a	a	b	a	b	b	a	a	a	a	a	b	b	a	a	a	b	b	b	a	a	b	a	a	a	b	a	b	a	a	b	b	b	a	b	b	a	a	b	a	b	a	b
AEGAMpCC_266	48.543	a	a	b	b	a	a	a	b	a	b	b	a	a	a	a	a	b	b	a	a	a	b	b	b	a	a	b	a	a	a	b	a	b	a	a	b	b	b	a	b	b	a	a	b	a	b	a	b
AHMR_16E11	48.543	a	a	b	b	a	a	a	b	a	b	b	a	a	a	a	a	b	b	a	a	a	b	b	b	a	a	b	a	a	a	b	a	b	a	a	b	b	b	a	b	b	a	a	b	a	b	a	b
AEGGMpAT_394	48.543	a	a	b	-	a	a	a	b	a	b	b	a	a	a	a	a	b	b	a	a	a	b	b	b	a	a	b	a	a	a	b	a	b	a	a	b	b	b	a	b	b	a	a	b	a	b	a	b
AHMR_13P19	48.543	a	a	b	b	a	a	a	b	a	b	b	a	a	a	a	a	b	b	a	-	a	b	b	b	a	a	b	a	a	a	b	a	b	a	a	b	b	b	a	b	b	a	a	b	a	b	a	b
CABMR_03M18	54.34	a	a	b	b	a	a	a	b	a	b	b	b	a	a	a	a	b	b	a	a	a	b	b	b	a	a	b	a	b	a	b	b	b	a	b	b	b	b	a	b	b	a	a	b	a	b	a	b
BEATMpAG_133	54.34	a	a	b	b	a	a	a	b	a	b	b	b	a	a	a	a	b	b	a	a	a	b	b	b	a	a	b	a	b	a	b	b	b	a	b	b	b	b	a	b	b	a	a	b	a	b	a	b
BHMR_11O04	54.34	a	a	b	b	a	a	a	b	a	-	b	b	a	a	a	a	b	b	a	a	a	b	b	b	a	a	b	a	b	a	b	b	b	a	b	b	b	b	a	b	b	a	a	b	a	b	a	b
CABMR_04J06	54.34	a	a	b	b	a	a	a	b	a	b	b	b	a	a	a	a	b	b	a	a	a	b	b	b	a	a	b	a	b	a	b	b	b	a	b	b	b	b	a	b	b	a	a	b	a	b	a	b
AEGGMpAT_256	55.487	a	a	b	b	a	a	a	b	a	b	b	b	a	a	a	a	b	b	a	a	a	b	b	b	a	a	b	a	b	a	b	b	b	a	b	b	b	b	a	b	b	a	a	b	a	b	a	b
AEGCMpCA_198	61.283	a	a	b	b	a	a	a	b	a	b	b	b	a	a	a	a	b	b	a	a	a	b	b	b	a	a	b	a	a	a	b	b	b	a	b	b	b	b	a	b	a	a	a	b	a	b	a	b
AEGAMpCA_108	67.596	a	a	b	b	a	a	a	a	a	b	b	b	a	a	a	a	b	b	a	a	a	b	b	b	a	a	a	b	a	a	b	a	b	a	b	b	b	b	a	b	a	a	a	b	a	b	a	b
AEGAMpAG_123	72.419	a	b	b	b	a	b	a	a	a	b	b	b	a	a	a	a	b	b	a	a	a	b	b	b	a	a	a	b	a	a	b	a	b	a	b	b	b	b	b	b	a	a	a	b	a	b	a	b
CAHMR_01O02	72.419	a	b	b	b	a	b	a	a	a	b	b	b	a	a	a	a	b	b	a	a	a	b	b	b	a	a	a	b	a	a	b	a	b	a	b	b	b	b	b	b	a	a	a	b	a	b	a	b
BEGAMpAG_120	72.419	a	b	b	b	a	b	a	a	a	b	b	b	a	a	a	a	b	b	a	a	a	b	b	b	a	a	a	b	a	a	b	a	b	a	b	b	b	b	b	b	a	a	a	b	a	b	a	b
ABMR_08D24	82.195	a	b	b	b	a	b	a	a	a	b	b	b	a	a	b	a	b	a	b	a	a	b	a	b	a	a	a	b	a	a	b	a	a	a	b	b	b	b	b	b	a	a	a	b	a	b	a	b
ABMR_09C11	83.881	a	b	b	b	a	b	a	a	a	b	b	b	a	a	b	a	b	a	b	a	a	b	a	b	a	a	a	b	a	a	b	a	a	a	b	b	b	b	b	b	a	a	a	b	a	b	a	b
AEGAMpCA_73	83.881	a	b	b	b	a	b	a	a	a	b	b	b	a	a	b	a	b	a	b	a	a	b	a	b	a	a	a	b	a	a	b	a	a	a	b	b	b	b	b	b	a	a	a	b	a	b	a	b
AHMR_10K08	83.881	a	b	b	b	a	b	a	a	a	b	b	b	a	a	b	a	b	a	b	a	a	b	a	b	a	a	a	b	a	a	b	a	a	a	b	b	b	b	b	b	a	a	a	b	a	b	a	b
AEGAMpCA_182	83.881	a	b	b	b	a	-	a	a	a	b	b	b	a	a	b	a	b	a	b	a	a	b	a	b	a	a	a	b	a	a	b	a	a	a	b	b	b	b	b	b	a	a	a	b	a	b	a	b
CAHMR_01N11	83.881	a	b	b	b	a	b	a	a	a	b	-	b	a	a	b	a	b	a	b	a	a	b	a	b	a	a	a	b	a	a	b	a	a	a	b	b	b	b	b	b	a	a	a	b	a	b	a	b
CAHMR_06I09	83.881	a	b	-	b	a	b	a	a	a	b	b	b	a	a	b	a	b	a	b	a	a	b	a	b	a	a	a	b	a	a	b	a	a	a	b	b	b	b	b	b	a	a	a	b	a	b	a	b
AHMR_08E16	83.881	a	b	b	b	a	b	a	a	a	b	b	b	a	a	b	a	b	a	b	a	a	b	a	b	a	a	a	b	a	a	b	a	a	a	b	b	b	b	b	b	a	a	a	b	a	b	a	b
AEGAMpAG_534	85.43	b	b	b	b	a	b	a	a	a	b	b	b	a	a	b	a	a	a	b	a	a	b	a	b	a	a	a	b	a	a	b	a	a	a	b	b	b	b	b	b	a	a	a	b	a	b	a	b
CAHMR_03O04	90.038	a	b	b	b	a	b	a	a	a	b	b	b	a	b	b	a	b	a	b	a	a	b	a	b	a	a	a	b	a	a	b	a	a	b	-	b	b	b	b	b	a	a	b	b	a	b	a	b
AEGCMpCA_99	93.308	a	b	b	b	a	b	a	a	a	b	a	b	a	b	b	a	b	a	b	a	a	b	a	b	a	a	a	b	a	a	b	a	a	b	b	b	b	b	b	b	a	a	b	b	a	b	a	b
CAHMR_04D20	93.308	a	b	b	b	a	b	a	a	a	b	a	b	a	b	b	a	b	a	b	a	a	b	a	b	a	a	a	b	a	a	b	a	a	b	b	b	b	b	b	b	a	a	b	b	a	b	a	b
CAHMR_03K09	93.308	a	b	b	b	a	b	a	a	a	b	a	b	a	b	b	a	b	a	b	a	a	-	a	b	a	a	a	b	a	a	b	a	a	b	b	b	b	b	b	b	a	a	b	b	-	b	a	b
AHMR_11G19	104.563	a	a	b	a	a	b	a	a	a	b	a	b	a	b	a	a	b	a	b	a	a	b	a	b	a	a	a	b	a	a	b	a	a	b	b	b	b	b	b	b	b	a	b	b	a	b	-	b
BBMR_12N14	109.835	a	a	b	a	a	b	-	a	a	a	a	b	a	b	a	-	b	a	b	b	a	-	a	b	a	a	a	b	a	a	b	a	a	b	b	b	b	b	b	b	b	a	b	b	-	b	a	b
AEGAMpCA_449	111.396	a	a	b	a	a	-	a	a	a	a	a	b	a	b	a	a	b	a	b	b	a	b	a	b	a	a	a	b	a	a	b	a	a	b	a	b	b	b	b	b	b	a	b	b	a	b	a	b
CABMR_06I18	117.578	a	a	b	a	a	b	a	b	a	a	a	b	a	b	a	a	b	a	b	b	a	b	b	b	a	a	a	b	a	a	b	a	a	b	a	b	b	b	b	b	b	a	b	b	a	b	b	b
CAHMR_03I13	117.578	a	a	b	a	a	b	a	b	a	a	a	b	a	b	a	a	b	a	b	b	a	b	b	b	a	a	a	b	a	a	b	a	a	b	a	b	b	b	b	b	b	a	b	b	a	b	b	b
CAHMR_06K21	117.578	a	a	b	a	a	b	a	b	a	a	a	b	a	b	a	a	b	a	b	b	a	b	b	b	a	a	a	b	a	a	b	a	a	b	a	b	b	b	b	b	b	a	b	b	a	b	b	b
group 3+22
AEGAMpAG_300	0	b	a	b	a	b	b	b	a	b	b	a	b	b	b	b	b	b	b	a	b	b	a	a	a	a	a	a	a	a	a	b	a	b	a	a	b	b	a	b	a	a	a	b	a	a	b	a	a
AEGAMpCA_122	1.638	b	a	b	a	b	b	b	a	b	b	a	b	b	b	b	b	a	b	a	b	b	a	a	a	a	a	a	a	a	a	b	a	b	a	a	b	b	a	b	a	a	a	b	a	a	b	a	a
CAHMR_02H17	1.638	b	a	b	a	b	b	b	a	b	b	a	b	b	b	b	b	a	b	a	b	b	a	a	a	a	a	a	a	a	a	b	a	b	a	a	b	b	a	b	a	a	a	b	a	a	b	a	a
CORF_43	1.638
AEATMpCA_145	1.638	b	a	b	a	b	b	b	a	b	b	a	b	b	b	b	b	a	b	a	b	b	a	a	a	a	a	a	a	a	a	b	a	b	a	a	b	-	a	b	a	a	a	b	a	a	b	a	a
AHMR_01H24	1.638	b	a	b	a	b	b	b	a	b	b	a	b	b	b	b	b	a	b	a	b	b	a	a	a	a	a	a	a	a	a	b	a	b	a	a	b	b	a	b	a	a	a	b	a	a	b	a	a
CAHMR_04N24	1.638	b	a	b	a	b	b	b	a	b	b	a	b	b	b	b	b	a	b	a	b	b	a	a	a	a	a	a	a	a	a	b	a	b	a	a	b	b	a	b	a	a	a	b	a	a	b	a	a
ABMR_12I01	15.367	b	b	b	a	b	b	b	a	a	b	a	b	b	b	b	b	a	b	a	a	b	a	b	a	a	a	a	a	a	a	b	a	a	a	a	b	b	a	b	a	a	a	b	b	a	b	a	a
BEGAMpCC_426	15.367	b	b	b	a	b	b	b	a	a	b	a	b	b	b	b	b	a	b	a	a	b	a	b	a	a	a	a	a	a	a	b	a	a	a	a	b	b	a	b	a	a	a	b	b	-	b	a	a
ABMR_15B24	33.815	b	b	b	a	b	b	a	b	a	b	a	b	b	b	b	a	b	b	b	a	b	a	b	a	b	a	a	a	a	a	b	-	a	a	a	b	b	a	b	a	a	-	-	b	a	-	a	a
CABMR_07L22	37.735	b	b	b	a	b	a	a	b	a	b	a	b	b	b	b	a	b	b	b	a	b	a	b	a	b	a	a	a	a	a	b	b	a	a	a	-	b	a	b	a	a	b	a	b	a	a	a	a
AEGAMpAG_85	43.978	a	b	b	a	b	a	a	b	a	b	a	b	b	b	b	a	b	b	b	a	b	a	b	b	b	b	b	a	b	a	b	b	a	a	a	b	b	a	b	b	a	b	a	b	a	a	b	a
CABMR_08B03	45.83	b	b	b	a	b	a	a	b	a	b	a	b	b	b	b	a	b	b	b	a	b	a	b	b	b	b	b	a	b	a	b	b	a	a	a	b	b	a	b	a	a	b	a	b	a	a	a	a
AEGTMpAT_730	45.83	b	b	b	a	b	a	a	b	a	b	a	b	b	b	b	a	b	b	b	a	b	a	b	b	b	b	b	a	b	a	b	b	a	a	a	b	b	a	b	a	a	b	a	b	a	a	a	a
CBBMR_10K24	45.83	b	b	b	a	b	a	a	b	a	b	a	b	b	b	b	a	b	b	b	a	b	a	b	b	b	b	b	a	b	a	b	b	a	a	a	b	b	a	b	a	a	b	a	b	a	a	a	a
BEGAMpCG_162	45.83	b	b	b	a	b	a	a	b	a	b	a	b	b	b	b	a	b	b	b	a	b	a	b	b	b	b	b	a	b	a	b	b	a	a	a	b	b	a	b	a	a	b	a	b	a	a	a	a
ABMR_03D12	45.83	b	b	b	a	b	a	a	b	a	b	a	b	b	b	b	a	b	b	b	a	b	a	b	b	b	b	b	a	b	a	b	b	a	a	a	b	b	a	-	a	a	b	a	b	a	a	a	a
CBBMR_10F14	45.83	b	b	b	a	b	a	a	b	a	b	a	b	-	b	b	a	b	b	b	a	b	a	b	b	b	b	b	a	b	a	b	b	a	a	a	b	b	a	b	a	a	b	a	b	a	a	a	a
CBBMR_11O13	45.83	b	b	b	a	b	a	a	b	a	b	a	b	b	b	b	a	b	b	b	a	b	a	b	b	b	b	b	a	b	a	b	b	a	a	a	b	b	a	b	a	a	b	a	b	a	a	a	a
BHMR_10K02	45.83	b	b	b	a	b	a	a	b	a	b	a	b	b	b	b	a	b	b	b	a	b	a	b	b	b	b	-	a	b	a	b	b	a	a	a	b	b	a	b	a	a	b	a	b	a	a	-	a
AHMR_06O06	45.83	b	b	b	a	b	a	a	b	a	b	a	b	b	b	b	a	-	b	b	a	-	a	b	b	b	b	b	a	b	a	b	b	a	a	a	b	-	a	b	a	a	b	a	b	a	a	-	a
ABMR_10H18	47.136	b	b	b	a	b	a	a	b	a	b	a	b	b	b	b	a	b	b	b	a	b	a	b	b	b	b	b	a	b	a	b	b	a	a	a	b	b	a	b	a	a	b	a	b	a	a	b	a
ABMR_15E06	47.136	b	b	b	a	b	a	a	b	a	b	a	b	b	b	b	a	b	b	b	a	b	a	b	b	b	b	b	a	b	a	b	b	a	a	a	b	b	a	b	a	a	b	a	b	a	a	b	a
ABMR_16J20	47.136	b	b	b	a	b	a	a	b	a	b	a	b	b	b	b	a	b	b	b	a	b	a	b	b	b	b	b	a	b	a	b	b	a	a	a	b	b	a	b	a	a	b	a	b	a	a	b	a
AHMR_05C05	47.136	b	b	b	a	b	a	a	b	a	b	a	b	b	b	b	a	b	b	b	a	b	a	b	b	b	b	b	a	b	a	b	b	a	a	a	b	b	a	b	a	a	b	a	b	a	a	b	a
AHMR_14C13	47.136	b	b	b	a	b	a	a	b	a	b	a	b	b	b	b	a	b	b	b	a	b	a	b	b	b	b	b	a	b	a	b	b	a	a	a	b	b	a	b	a	a	b	a	b	a	a	b	a
AHMR_15E02	47.136	b	b	b	a	b	a	a	b	a	b	a	b	b	b	b	a	b	b	b	a	b	a	b	b	b	b	b	a	b	a	b	b	a	a	a	b	b	a	b	a	a	b	a	b	a	a	b	a
AHMR_15J24	47.136	b	b	b	a	b	a	a	b	a	b	a	b	b	b	b	a	b	b	b	a	b	a	b	b	b	b	b	a	b	a	b	b	a	a	a	b	b	a	b	a	a	b	a	b	a	a	b	a
BEGAMpCA_326	47.136	b	b	b	a	b	a	a	b	a	b	a	b	b	b	b	a	b	b	b	a	b	a	b	b	b	b	b	a	b	a	b	b	a	a	a	b	b	a	b	a	a	b	a	b	a	a	b	a
BEGAMpAC_283	47.632	b	b	b	a	b	a	a	b	a	b	a	b	b	b	b	a	a	b	b	a	b	a	b	b	b	b	b	a	b	a	b	b	a	a	a	b	b	a	b	a	a	b	a	b	a	a	b	a
BEGAMpAC_489	47.632	b	b	b	a	b	a	a	b	a	b	a	b	b	b	b	a	a	b	b	a	b	a	b	b	b	b	b	a	b	a	b	b	a	a	a	b	b	a	b	a	a	b	a	b	a	a	b	a
AEGAMpCA_239	51.009	b	a	b	a	b	a	a	b	a	b	a	b	b	b	b	a	b	b	b	a	b	a	b	b	b	b	b	a	b	a	b	b	a	a	a	b	b	b	b	a	a	b	a	b	a	a	b	a
CHMR_14L04	51.009	b	a	b	a	b	a	a	b	a	b	a	b	b	b	b	a	b	b	b	a	b	a	b	b	b	b	b	a	b	a	b	b	a	a	a	b	b	b	b	a	a	b	a	b	a	a	b	a
AHMR_14L18	51.009	b	a	b	a	b	a	a	b	a	b	a	b	b	b	b	a	b	b	b	a	b	a	b	b	b	b	b	a	b	a	b	b	a	a	a	b	b	b	b	a	a	b	a	b	a	a	b	a
BEATMpAG_212	51.009	b	a	b	a	b	a	a	b	a	b	a	b	b	b	b	a	b	b	b	a	b	a	b	b	b	b	b	a	b	a	b	b	a	a	a	b	b	b	b	a	a	b	a	b	a	a	b	a
BEGCMpCA_254	51.009	b	a	b	a	b	a	a	b	a	b	a	b	b	b	b	a	b	b	b	a	b	a	b	b	b	b	b	a	b	a	b	b	a	a	a	b	b	b	b	a	a	b	a	b	a	a	b	a
CBHMR_10H11	51.009	b	a	b	a	b	a	a	b	a	b	a	b	b	b	b	a	b	b	b	a	b	a	b	b	b	b	b	a	b	a	b	b	a	a	a	b	b	b	b	a	a	b	a	b	a	a	b	a
CAHMR_08N04	51.009	b	a	b	a	b	a	a	b	a	b	a	b	b	b	b	a	b	b	b	a	b	-	b	b	b	b	b	a	b	a	b	b	a	a	-	b	b	b	b	a	a	b	a	b	a	a	b	a
CHMR_13P21	51.009	b	a	b	a	b	a	a	b	a	b	a	b	b	b	b	a	b	b	b	a	b	a	b	b	b	b	b	a	-	a	b	b	a	a	a	b	-	b	b	a	a	b	a	b	a	a	b	a
CBHMR_12M18	51.009	b	a	b	a	b	a	a	b	a	b	a	b	b	b	b	-	b	b	b	a	b	a	b	b	b	b	b	a	b	a	b	b	a	-	a	b	b	b	b	a	-	b	a	b	a	a	b	a
AHMR_04L03	54.367	b	a	b	a	b	a	a	b	a	b	a	b	b	b	b	a	b	b	b	a	b	a	b	b	b	b	b	a	b	a	b	b	a	a	a	b	b	b	b	a	a	a	b	b	a	a	b	a
AHMR_12K09	54.367	b	a	b	a	b	a	a	b	a	b	a	b	b	b	b	a	b	b	b	a	b	a	b	b	b	b	b	a	b	a	b	b	a	a	a	b	b	b	b	a	a	a	b	b	a	a	b	a
ggc-0001	54.367	b	a	b	a	b	a	a	b	a	b	a	b	b	b	b	a	b	b	b	a	b	a	b	b	b	b	b	a	b	a	b	b	a	a	a	b	b	b	b	a	a	a	b	b	a	a	b	a
ABMR_12F22	54.367	b	a	b	a	b	a	a	b	a	b	a	b	b	b	b	a	b	b	b	a	b	a	b	b	b	b	b	a	b	a	b	b	a	a	a	b	b	b	b	a	a	a	b	b	a	a	b	a
AHMR_11F21	54.367	b	a	b	a	b	a	a	b	a	b	a	b	b	b	b	-	b	b	b	a	b	a	b	b	b	b	b	a	b	a	b	b	a	a	a	b	b	b	b	a	a	a	b	b	a	a	b	a
AHMR_02O01	54.367	b	a	b	a	b	a	a	b	a	-	a	b	b	b	b	a	b	b	b	a	b	a	b	b	b	b	-	a	b	a	b	b	a	a	a	b	b	b	b	a	a	a	b	b	a	a	b	a
AHMR_09J21	54.367	b	a	b	a	b	a	a	b	a	b	a	b	b	-	b	a	b	b	b	a	b	a	b	b	b	b	b	a	b	-	b	b	a	a	a	b	b	b	b	a	a	a	b	b	a	a	b	a
AHMR_13N16	54.367	b	a	b	a	b	a	a	b	a	b	a	b	b	b	b	a	-	b	b	a	b	-	b	b	b	b	b	a	-	a	b	b	a	a	a	b	-	b	b	a	a	a	b	b	a	a	b	a
ABMR_03J13	56.114	b	a	b	a	b	a	a	b	a	b	a	a	b	b	b	a	b	b	b	a	b	a	b	b	b	b	b	a	b	a	b	b	a	a	a	b	b	b	b	a	a	a	b	b	a	a	b	a
ABMR_12K16	56.114	b	a	b	a	b	a	a	b	a	b	a	a	b	b	b	a	b	b	b	a	b	a	b	b	b	b	b	a	b	a	b	b	a	a	a	b	b	b	b	a	a	a	-	b	a	a	-	a
AHMR_02G16	56.114	b	a	b	a	b	a	a	-	a	b	a	a	b	b	b	a	b	b	b	a	b	a	b	b	b	b	-	a	b	a	b	b	a	a	a	b	b	b	b	a	a	a	b	b	a	a	b	a
CBHMR_16F17	56.114	b	a	b	a	b	a	a	b	a	b	a	a	b	-	b	a	b	b	b	a	b	a	b	b	b	b	b	a	b	a	b	b	a	a	a	b	b	b	b	a	a	a	b	b	a	a	b	a
ABMR_13D09	56.114	b	a	b	a	b	a	a	b	a	b	a	a	b	b	b	a	-	b	b	a	b	a	b	b	b	b	b	a	b	a	b	b	a	a	a	b	b	b	b	a	a	a	b	b	a	a	b	a
ABMR_06F24	56.114	b	a	b	a	b	a	a	b	a	b	a	a	b	b	b	a	b	b	b	a	b	a	b	b	b	-	b	a	b	a	b	b	a	a	a	b	b	b	b	a	a	a	b	b	a	a	b	a
ABMR_05P24	56.114	b	a	b	a	b	a	a	b	a	b	a	a	b	b	b	a	b	b	b	a	b	a	b	b	b	b	b	a	b	a	b	b	a	a	a	b	b	-	b	a	a	a	b	b	a	a	b	a
BBMR_10I24	56.114	b	a	b	a	b	a	a	b	a	b	a	a	b	b	b	a	b	b	b	a	b	a	b	b	b	b	b	a	b	a	b	b	a	a	a	b	b	b	b	a	a	a	b	b	a	a	b	a
ABMR_15L04	56.114	b	a	b	a	b	a	a	b	a	b	a	a	b	b	b	a	b	b	b	a	b	a	b	b	b	b	b	a	b	a	b	b	a	a	a	b	b	b	b	a	a	a	b	b	a	a	b	a
ABMR_10N24	56.114	b	a	b	a	b	a	a	b	a	b	a	a	b	b	b	a	b	b	b	a	b	a	b	b	b	b	b	a	b	a	b	b	a	a	a	b	b	b	b	a	a	a	b	b	a	a	b	a
ABMR_07O18	56.114	b	a	b	a	b	a	a	b	a	b	a	a	b	b	b	a	b	b	b	a	b	a	b	b	b	b	b	a	b	a	b	b	a	a	a	b	b	b	b	a	a	a	b	b	a	a	b	a
CABMR_07N16	56.114	b	a	b	a	b	a	a	b	a	b	a	a	b	b	b	a	b	b	b	a	b	a	b	b	b	b	b	a	b	a	b	b	a	a	a	b	b	b	b	a	a	a	b	b	a	a	b	a
ABMR_07F15	56.114	b	a	b	a	b	a	a	b	a	b	a	a	b	b	b	a	b	b	b	a	b	a	b	b	b	b	b	a	b	a	b	b	a	a	a	b	b	b	b	a	a	a	b	b	a	a	b	a
AEGTMpAT_293	57.865	b	a	b	a	b	a	a	b	a	b	a	a	b	b	b	a	b	a	b	a	b	a	b	b	b	b	b	a	b	a	b	b	a	a	a	b	b	b	b	a	a	a	b	b	a	a	b	a
BHMR_09C09	61.407	b	a	b	a	a	a	a	b	b	b	a	a	b	b	b	a	b	a	b	a	b	a	b	b	b	b	b	a	b	a	b	b	a	a	a	b	b	b	b	a	a	a	b	b	a	a	b	a
CAHMR_03P24	65.01	b	a	b	b	a	a	a	b	b	b	a	a	b	a	b	a	b	a	b	a	b	a	b	b	b	b	b	a	b	a	b	b	a	a	a	b	b	b	b	a	a	a	b	b	a	a	b	a
BEGGMpAT_209	65.01	b	a	b	b	a	a	a	b	b	b	a	a	b	a	b	a	b	a	b	a	b	a	b	b	b	b	b	a	b	a	b	b	a	a	a	b	b	b	b	a	a	a	b	b	a	a	b	a
CBHMR_14N08	65.01	b	a	b	b	a	a	a	b	b	b	a	a	b	a	b	a	b	a	b	a	b	a	b	b	b	b	b	a	b	a	b	b	a	a	a	b	b	b	b	a	a	a	b	b	a	a	b	a
CAHMR_02P17	65.01	b	a	b	b	a	a	a	b	b	b	a	a	b	a	b	a	b	a	b	a	b	a	b	b	b	b	b	a	b	a	b	b	a	a	a	b	b	b	b	a	a	a	b	b	-	a	b	a
CAHMR_06K18	65.01	b	a	b	b	a	a	a	b	b	b	a	a	b	a	b	a	b	a	b	a	b	a	b	b	b	b	b	a	b	a	b	b	a	-	a	b	b	b	b	a	a	a	b	b	a	a	b	a
AHMR_09J09	65.01	b	a	b	b	a	a	a	b	b	b	a	a	b	a	b	a	b	a	b	a	b	a	-	b	b	b	b	a	b	a	b	b	a	a	a	b	b	b	b	a	a	a	b	b	a	a	b	a
CBHMR_16P23	65.01	b	a	b	b	a	a	a	b	b	b	a	a	-	a	b	a	b	a	b	a	b	a	b	b	b	b	b	a	b	a	b	b	a	a	a	b	b	b	b	a	a	a	b	b	a	a	b	a
BHMR_15N17	65.01	b	a	b	b	a	a	-	b	b	b	a	a	b	-	b	-	b	a	b	a	b	a	b	b	b	b	b	a	b	a	b	b	a	a	a	b	b	b	b	a	a	a	b	b	a	a	b	a
CBHMR_11E22	65.01	b	a	b	b	a	a	a	b	b	-	a	a	b	a	b	a	b	a	b	a	b	a	b	b	b	b	b	a	b	a	b	b	-	a	a	b	b	b	b	a	-	a	b	b	a	a	b	a
CBHMR_13C20	65.01	b	a	b	b	a	a	a	b	b	-	a	a	b	a	b	a	b	-	b	a	b	a	b	b	b	b	b	a	b	a	b	b	a	a	-	b	b	b	b	a	a	a	b	b	a	a	b	a
CBHMR_15D02	75.671	b	a	a	b	a	a	a	a	b	b	a	a	a	a	-	a	b	a	b	a	a	a	b	b	b	b	b	a	b	a	b	b	a	a	b	b	b	b	b	a	a	a	b	b	a	a	a	a
ABMR_10M22	76.428	b	a	a	b	a	a	a	a	b	b	a	a	a	a	b	a	b	a	b	a	a	a	b	b	b	b	b	a	b	a	b	b	a	a	a	b	b	b	b	a	a	a	b	b	a	a	a	a
BEGAMpAG_505	78.189	b	a	a	b	a	a	a	a	b	b	a	a	a	a	b	a	a	a	b	a	a	a	b	b	b	b	b	a	b	a	b	b	a	a	a	b	b	b	b	a	a	a	b	b	a	a	a	a
ABMR_14M05	81.783	b	a	a	b	a	a	a	a	b	-	a	a	a	a	b	b	a	a	b	a	a	a	b	b	b	b	b	a	b	a	b	b	a	a	-	b	b	b	b	a	a	a	b	b	a	a	a	a
CAHMR_01N01	85.544	b	a	a	b	a	a	a	a	b	b	a	a	a	a	b	b	a	a	b	a	a	a	b	b	b	-	b	a	b	a	b	b	a	a	a	b	b	b	b	a	a	a	b	b	a	a	a	a
AHMR_13A18	90.855	b	a	a	b	a	a	a	a	b	b	a	a	a	a	b	b	a	a	b	b	a	a	b	b	b	b	b	a	b	a	b	b	a	a	a	b	b	b	b	a	a	a	b	b	a	b	a	a
AHMR_14O11	90.855	b	a	a	b	a	a	a	a	b	b	a	a	a	a	b	b	a	a	b	b	a	a	b	b	b	b	b	a	b	a	b	b	a	a	a	b	b	b	b	a	a	a	b	b	a	b	a	a
AHMR_09J19	90.855	b	a	a	b	a	a	a	a	b	b	a	a	a	a	b	b	a	a	b	b	a	a	b	b	b	-	b	a	-	a	b	-	a	a	a	b	b	b	b	a	a	a	b	b	a	b	a	a
AHMR_13M17	94.502	b	a	a	b	a	a	a	a	b	b	a	a	a	a	b	b	a	a	b	b	a	b	a	b	b	b	b	a	b	a	b	b	a	a	a	b	b	b	b	a	a	a	b	b	a	b	a	a
AHMR_14K16	94.502	b	a	a	b	a	a	a	a	b	b	a	a	a	a	b	b	a	a	b	b	a	b	a	b	b	b	b	a	b	a	b	b	a	a	a	b	b	b	b	a	a	a	b	b	a	b	a	a
AEGAMpCA_87	107.526	b	a	a	b	a	a	a	a	b	b	a	a	a	b	b	b	a	a	b	b	a	b	a	b	a	b	b	a	b	b	a	b	a	a	a	a	b	b	b	a	a	a	b	b	b	b	a	a
AHMR_05N13	110.987	b	a	a	b	a	a	a	a	b	b	a	a	a	b	b	-	a	a	b	b	a	b	a	b	a	b	b	a	b	b	a	b	-	-	a	a	-	b	b	b	a	a	a	b	b	b	-	a
BEGAMpAC_153	112.563	b	a	a	b	a	a	a	a	b	b	a	a	a	b	b	b	b	a	b	b	a	b	a	b	a	a	b	a	b	b	a	b	a	a	a	a	b	b	b	b	a	a	a	b	b	b	a	a
CAHMR_04J17	113.321	b	a	a	b	a	a	a	a	b	b	a	a	a	b	b	b	a	a	b	b	a	b	a	b	a	a	b	a	b	b	a	b	a	a	a	a	b	b	b	b	a	a	a	b	b	b	a	a
AHMR_08A06	113.321	b	a	a	b	a	a	a	a	b	b	a	a	a	b	b	b	a	a	b	b	a	b	a	b	a	a	b	a	b	b	a	b	a	a	a	a	b	b	b	b	a	a	a	b	b	b	a	a
CBBMR_10B19	113.321	b	a	a	b	a	a	a	a	b	b	a	a	a	b	b	b	a	a	b	b	a	b	a	b	a	a	b	a	b	-	a	b	a	a	a	a	b	b	b	b	a	a	a	b	b	b	a	a
CBBMR_10C19	113.321	b	a	a	b	a	a	a	a	b	b	a	a	a	b	b	b	a	a	b	b	a	b	a	b	a	a	b	a	b	b	a	b	a	a	a	a	b	b	b	b	a	a	a	b	b	b	a	a
CBBMR_09J20	115.063	b	a	a	b	a	a	a	a	b	b	a	b	a	b	b	b	a	a	b	b	a	b	a	b	a	a	b	a	b	b	a	b	a	a	a	a	b	b	b	b	a	a	a	b	b	b	a	a
ABMR_03H04	116.841	b	a	a	b	a	a	a	a	b	b	a	b	a	b	b	b	a	b	-	b	a	b	a	b	a	a	b	a	b	b	a	b	a	a	a	a	b	b	b	b	a	a	a	b	b	b	a	a
AEATMpAG_124	122.016	b	a	a	b	a	a	a	a	b	b	a	b	a	b	b	b	a	b	b	b	a	b	a	b	a	a	b	a	b	b	a	b	a	a	a	a	b	b	b	b	a	a	a	b	b	b	a	b
BBMR_09J15	125.477	b	a	a	b	a	a	b	a	b	b	a	b	a	b	b	b	a	b	b	b	a	b	a	b	a	a	b	a	b	b	a	b	a	a	a	a	b	b	b	b	a	a	a	b	b	b	a	b
BBMR_10A23	125.477	b	a	a	b	a	a	b	a	b	b	a	b	a	b	b	b	a	b	b	b	a	b	a	b	a	a	b	a	b	b	a	b	a	a	a	a	b	b	b	b	a	a	a	b	b	b	a	b
BBMR_10D05	125.477	b	a	a	b	a	a	b	a	b	b	a	b	a	b	b	b	a	b	b	b	a	b	a	b	a	a	b	a	b	b	a	b	a	a	a	a	b	b	b	b	a	a	a	b	b	b	a	b
BBMR_10O16	125.477	b	a	a	b	a	a	b	a	b	b	a	b	a	b	b	b	a	b	b	b	a	b	a	b	a	a	b	a	b	b	a	b	a	a	a	a	b	b	b	b	a	a	a	b	b	b	a	b
BBMR_10P15	125.477	b	a	a	b	a	a	b	a	b	b	a	b	a	b	b	b	a	b	b	b	a	b	a	b	a	a	b	a	b	b	a	b	a	a	a	a	b	b	b	b	a	a	a	b	b	b	a	b
BBMR_11E07	125.477	b	a	a	b	a	a	b	a	b	b	a	b	a	b	b	b	a	b	b	b	a	b	a	b	a	a	b	a	b	b	a	b	a	a	a	a	b	b	b	b	a	a	a	b	b	b	a	b
BBMR_11N06	125.477	b	a	a	b	a	a	b	a	b	b	a	b	a	b	b	b	a	b	b	b	a	b	a	b	a	a	b	a	b	b	a	b	a	a	a	a	b	b	b	b	a	a	a	b	b	b	a	b
BBMR_11P06	125.477	b	a	a	b	a	a	b	a	b	b	a	b	a	b	b	b	a	b	b	b	a	b	a	b	a	a	b	a	b	b	a	b	a	a	a	a	b	b	b	b	a	a	a	b	b	b	a	b
BBMR_12C01	125.477	b	a	a	b	a	a	b	a	b	b	a	b	a	b	b	b	a	b	b	b	a	b	a	b	a	a	b	a	b	b	a	b	a	a	a	a	b	b	b	b	a	a	a	b	b	b	a	b
BBMR_12G07	125.477	b	a	a	b	a	a	b	a	b	b	a	b	a	b	b	b	a	b	b	b	a	b	a	b	a	a	b	a	b	b	a	b	a	a	a	a	b	b	b	b	a	a	a	b	b	b	a	b
BBMR_12I11	125.477	b	a	a	b	a	a	b	a	b	b	a	b	a	b	b	b	a	b	b	b	a	b	a	b	a	a	b	a	b	b	a	b	a	a	a	a	b	b	b	b	a	a	a	b	b	b	a	b
BBMR_12I21	125.477	b	a	a	b	a	a	b	a	b	b	a	b	a	b	b	b	a	b	b	b	a	b	a	b	a	a	b	a	b	b	a	b	a	a	a	a	b	b	b	b	a	a	a	b	b	b	a	b
BBMR_12N02	125.477	b	a	a	b	a	a	b	a	b	b	a	b	a	b	b	b	a	b	b	b	a	b	a	b	a	a	b	a	b	b	a	b	a	a	a	a	b	b	b	b	a	a	a	b	b	b	a	b
BBMR_12P08	125.477	b	a	a	b	a	a	b	a	b	b	a	b	a	b	b	b	a	b	b	b	a	b	a	b	a	a	b	a	b	b	a	b	a	a	a	a	b	b	b	b	a	a	a	b	b	b	a	b
BBMR_13C07	125.477	b	a	a	b	a	a	b	a	b	b	a	b	a	b	b	b	a	b	b	b	a	b	a	b	a	a	b	a	b	b	a	b	a	a	a	a	b	b	b	b	a	a	a	b	b	b	a	b
BBMR_13C18	125.477	b	a	a	b	a	a	b	a	b	b	a	b	a	b	b	b	a	b	b	b	a	b	a	b	a	a	b	a	b	b	a	b	a	a	a	a	b	b	b	b	a	a	a	b	b	b	a	b
BBMR_13D02	125.477	b	a	a	b	a	a	b	a	b	b	a	b	a	b	b	b	a	b	b	b	a	b	a	b	a	a	b	a	b	b	a	b	a	a	a	a	b	b	b	b	a	a	a	b	b	b	a	b
BBMR_13G02	125.477	b	a	a	b	a	a	b	a	b	b	a	b	a	b	b	b	a	b	b	b	a	b	a	b	a	a	b	a	b	b	a	b	a	a	a	a	b	b	b	b	a	a	a	b	b	b	a	b
BBMR_13H04	125.477	b	a	a	b	a	a	b	a	b	b	a	b	a	b	b	b	a	b	b	b	a	b	a	b	a	a	b	a	b	b	a	b	a	a	a	a	b	b	b	b	a	a	a	b	b	b	a	b
BBMR_13K02	125.477	b	a	a	b	a	a	b	a	b	b	a	b	a	b	b	b	a	b	b	b	a	b	a	b	a	a	b	a	b	b	a	b	a	a	a	a	b	b	b	b	a	a	a	b	b	b	a	b
BBMR_13L06	125.477	b	a	a	b	a	a	b	a	b	b	a	b	a	b	b	b	a	b	b	b	a	b	a	b	a	a	b	a	b	b	a	b	a	a	a	a	b	b	b	b	a	a	a	b	b	b	a	b
BBMR_13L12	125.477	b	a	a	b	a	a	b	a	b	b	a	b	a	b	b	b	a	b	b	b	a	b	a	b	a	a	b	a	b	b	a	b	a	a	a	a	b	b	b	b	a	a	a	b	b	b	a	b
BBMR_13O19	125.477	b	a	a	b	a	a	b	a	b	b	a	b	a	b	b	b	a	b	b	b	a	b	a	b	a	a	b	a	b	b	a	b	a	a	a	a	b	b	b	b	a	a	a	b	b	b	a	b
BBMR_14A14	125.477	b	a	a	b	a	a	b	a	b	b	a	b	a	b	b	b	a	b	b	b	a	b	a	b	a	a	b	a	b	b	a	b	a	a	a	a	b	b	b	b	a	a	a	b	b	b	a	b
BBMR_14C05	125.477	b	a	a	b	a	a	b	a	b	b	a	b	a	b	b	b	a	b	b	b	a	b	a	b	a	a	b	a	b	b	a	b	a	a	a	a	b	b	b	b	a	a	a	b	b	b	a	b
BBMR_14E02	125.477	b	a	a	b	a	a	b	a	b	b	a	b	a	b	b	b	a	b	b	b	a	b	a	b	a	a	b	a	b	b	a	b	a	a	a	a	b	b	b	b	a	a	a	b	b	b	a	b
BBMR_14E14	125.477	b	a	a	b	a	a	b	a	b	b	a	b	a	b	b	b	a	b	b	b	a	b	a	b	a	a	b	a	b	b	a	b	a	a	a	a	b	b	b	b	a	a	a	b	b	b	a	b
BBMR_14G02	125.477	b	a	a	b	a	a	b	a	b	b	a	b	a	b	b	b	a	b	b	b	a	b	a	b	a	a	b	a	b	b	a	b	a	a	a	a	b	b	b	b	a	a	a	b	b	b	a	b
BBMR_14H23	125.477	b	a	a	b	a	a	b	a	b	b	a	b	a	b	b	b	a	b	b	b	a	b	a	b	a	a	b	a	b	b	a	b	a	a	a	a	b	b	b	b	a	a	a	b	b	b	a	b
BBMR_14N01	125.477	b	a	a	b	a	a	b	a	b	b	a	b	a	b	b	b	a	b	b	b	a	b	a	b	a	a	b	a	b	b	a	b	a	a	a	a	b	b	b	b	a	a	a	b	b	b	a	b
BBMR_14N09	125.477	b	a	a	b	a	a	b	a	b	b	a	b	a	b	b	b	a	b	b	b	a	b	a	b	a	a	b	a	b	b	a	b	a	a	a	a	b	b	b	b	a	a	a	b	b	b	a	b
BBMR_15B03	125.477	b	a	a	b	a	a	b	a	b	b	a	b	a	b	b	b	a	b	b	b	a	b	a	b	a	a	b	a	b	b	a	b	a	a	a	a	b	b	b	b	a	a	a	b	b	b	a	b
BBMR_15E04	125.477	b	a	a	b	a	a	b	a	b	b	a	b	a	b	b	b	a	b	b	b	a	b	a	b	a	a	b	a	b	b	a	b	a	a	a	a	b	b	b	b	a	a	a	b	b	b	a	b
BBMR_15G02	125.477	b	a	a	b	a	a	b	a	b	b	a	b	a	b	b	b	a	b	b	b	a	b	a	b	a	a	b	a	b	b	a	b	a	a	a	a	b	b	b	b	a	a	a	b	b	b	a	b
BBMR_15J16	125.477	b	a	a	b	a	a	b	a	b	b	a	b	a	b	b	b	a	b	b	b	a	b	a	b	a	a	b	a	b	b	a	b	a	a	a	a	b	b	b	b	a	a	a	b	b	b	a	b
BBMR_15K19	125.477	b	a	a	b	a	a	b	a	b	b	a	b	a	b	b	b	a	b	b	b	a	b	a	b	a	a	b	a	b	b	a	b	a	a	a	a	b	b	b	b	a	a	a	b	b	b	a	b
BBMR_15N20	125.477	b	a	a	b	a	a	b	a	b	b	a	b	a	b	b	b	a	b	b	b	a	b	a	b	a	a	b	a	b	b	a	b	a	a	a	a	b	b	b	b	a	a	a	b	b	b	a	b
BBMR_16A19	125.477	b	a	a	b	a	a	b	a	b	b	a	b	a	b	b	b	a	b	b	b	a	b	a	b	a	a	b	a	b	b	a	b	a	a	a	a	b	b	b	b	a	a	a	b	b	b	a	b
BBMR_16B08	125.477	b	a	a	b	a	a	b	a	b	b	a	b	a	b	b	b	a	b	b	b	a	b	a	b	a	a	b	a	b	b	a	b	a	a	a	a	b	b	b	b	a	a	a	b	b	b	a	b
BBMR_16G12	125.477	b	a	a	b	a	a	b	a	b	b	a	b	a	b	b	b	a	b	b	b	a	b	a	b	a	a	b	a	b	b	a	b	a	a	a	a	b	b	b	b	a	a	a	b	b	b	a	b
BBMR_16H05	125.477	b	a	a	b	a	a	b	a	b	b	a	b	a	b	b	b	a	b	b	b	a	b	a	b	a	a	b	a	b	b	a	b	a	a	a	a	b	b	b	b	a	a	a	b	b	b	a	b
BBMR_16M06	125.477	b	a	a	b	a	a	b	a	b	b	a	b	a	b	b	b	a	b	b	b	a	b	a	b	a	a	b	a	b	b	a	b	a	a	a	a	b	b	b	b	a	a	a	b	b	b	a	b
BBMR_16O24	125.477	b	a	a	b	a	a	b	a	b	b	a	b	a	b	b	b	a	b	b	b	a	b	a	b	a	a	b	a	b	b	a	b	a	a	a	a	b	b	b	b	a	a	a	b	b	b	a	b
BBMR_16P03	125.477	b	a	a	b	a	a	b	a	b	b	a	b	a	b	b	b	a	b	b	b	a	b	a	b	a	a	b	a	b	b	a	b	a	a	a	a	b	b	b	b	a	a	a	b	b	b	a	b
BBMR_09E12	125.477	b	a	a	b	a	a	b	a	b	b	a	b	a	b	b	b	a	b	b	b	a	b	a	b	a	a	b	a	b	b	a	-	a	a	a	a	b	b	b	b	a	a	a	b	b	b	a	b
BBMR_09L17	125.477	b	a	a	b	a	a	b	a	b	b	a	b	a	b	b	b	a	b	b	b	a	b	a	b	a	a	b	a	b	b	a	b	a	-	a	a	b	b	b	b	a	a	a	b	b	b	a	b
BBMR_10B03	125.477	b	a	a	b	a	a	b	a	b	b	a	b	a	b	b	b	a	b	b	b	a	b	a	b	a	a	b	a	b	b	a	b	a	a	a	a	b	b	b	b	a	a	a	b	b	b	a	b
BBMR_10E18	125.477	b	a	-	b	a	a	b	a	b	b	a	b	a	b	b	b	a	b	b	b	a	b	a	b	a	a	b	a	b	b	a	b	a	a	a	a	b	b	b	b	a	a	a	b	b	b	a	b
BBMR_11C21	125.477	b	a	a	b	a	a	b	a	b	b	a	b	a	b	b	b	a	b	b	b	a	b	a	b	a	a	b	a	b	b	a	b	a	a	a	a	b	b	b	b	a	a	a	b	b	b	a	b
BBMR_11G04	125.477	b	a	a	b	a	a	b	a	b	b	a	b	a	b	b	b	a	b	b	b	a	b	a	b	a	a	b	a	b	b	a	-	a	a	a	a	b	b	b	b	a	a	a	b	b	b	a	b
BBMR_11L21	125.477	b	a	a	b	a	a	b	a	b	b	a	b	a	b	b	b	a	b	b	b	a	b	a	b	a	a	b	a	b	b	a	b	a	a	a	a	b	b	b	b	a	a	a	-	b	b	a	b
BBMR_11N20	125.477	b	a	a	b	a	a	b	-	b	b	a	b	a	b	b	b	a	b	b	b	a	b	a	b	a	a	b	a	b	b	a	b	a	a	a	a	b	b	b	b	a	a	a	b	b	b	a	b
BBMR_12L23	125.477	b	a	a	b	a	a	b	a	b	b	a	b	a	b	b	b	a	b	b	b	a	b	a	b	a	a	b	a	b	b	a	b	a	a	a	a	b	b	b	b	a	-	a	b	b	b	a	b
BBMR_12M14	125.477	b	a	a	b	a	a	b	a	b	b	a	b	a	b	b	b	a	b	b	b	a	b	a	b	a	a	b	a	b	b	a	-	a	a	a	a	b	b	b	b	a	a	a	b	b	b	a	b
BBMR_13E20	125.477	b	a	a	b	a	a	b	a	b	b	a	b	a	b	b	b	a	b	b	b	a	b	a	b	a	a	b	a	b	b	a	b	a	a	a	a	b	b	b	b	a	a	a	b	b	b	-	b
BBMR_15B21	125.477	b	a	a	b	a	a	b	a	b	b	a	b	a	b	b	b	a	b	b	b	a	b	a	b	a	a	b	a	b	b	a	b	a	a	a	a	b	b	b	b	-	a	a	b	b	b	a	b
BBMR_15P06	125.477	b	a	a	b	a	a	b	a	b	b	a	b	a	b	b	b	a	b	b	b	a	b	a	b	a	a	b	a	b	b	a	b	a	a	a	a	b	b	b	b	a	a	a	b	b	b	a	b
BBMR_16E21	125.477	b	a	a	b	a	a	b	a	b	b	a	b	a	b	b	b	a	b	b	b	a	b	-	b	a	a	b	a	b	b	a	b	a	a	a	a	b	b	b	b	a	a	a	b	b	b	a	b
BBMR_16E23	125.477	b	a	a	b	a	a	b	a	b	b	a	b	a	b	b	b	a	b	b	b	a	b	a	b	a	a	b	a	b	b	a	b	a	a	a	a	b	b	b	b	a	a	a	b	b	b	-	b
BBMR_16G14	125.477	b	a	a	b	a	a	b	a	b	b	a	b	a	b	b	b	a	b	b	b	a	b	a	b	a	a	b	a	b	b	a	b	a	a	a	a	b	b	b	b	a	a	-	b	b	b	a	b
BBMR_16O09	125.477	b	a	a	b	a	a	b	a	b	b	a	b	a	b	b	b	a	b	b	b	a	b	a	b	a	a	b	a	b	b	a	b	a	a	a	a	b	b	b	b	a	-	a	b	b	b	a	b
BBMR_10B16	125.477	b	a	a	b	a	a	b	a	b	b	a	b	a	b	b	b	a	b	b	b	a	b	a	b	a	a	b	a	b	b	a	b	a	a	a	a	b	b	b	b	a	a	a	b	b	b	-	b
BBMR_10L08	125.477	b	a	a	b	a	a	b	a	b	b	a	b	a	b	b	b	a	b	b	b	a	b	-	b	a	a	b	a	b	b	a	b	a	a	a	a	b	b	b	b	a	a	a	b	b	b	-	b
BBMR_12B03	125.477	b	a	a	b	a	a	b	a	b	b	a	b	-	b	b	b	a	b	b	b	a	b	a	b	a	a	b	a	b	b	a	-	a	a	a	a	b	b	b	b	a	a	a	b	b	b	a	b
BBMR_12I22	125.477	b	a	a	b	a	a	b	a	b	b	a	b	a	b	b	b	a	b	b	b	a	b	a	b	a	a	b	a	b	b	a	b	a	a	a	a	b	b	b	b	-	a	a	b	b	b	a	b
BBMR_12M20	125.477	b	a	a	b	a	a	b	a	b	b	a	b	a	b	b	b	a	b	b	b	a	b	a	b	a	a	b	a	b	b	a	b	a	a	a	a	b	b	b	b	-	a	a	b	b	b	a	b
BBMR_12M23	125.477	b	a	a	b	a	a	b	a	b	b	a	b	a	b	b	b	a	b	b	b	a	b	a	b	a	a	b	a	b	b	a	b	a	a	a	a	b	b	b	b	a	a	a	-	b	b	a	b
BBMR_14B20	125.477	b	a	a	b	a	a	b	a	b	b	a	b	a	b	b	b	a	b	b	b	a	b	a	b	a	a	b	a	b	b	-	b	a	a	a	a	b	b	b	b	a	a	a	b	b	b	a	b
BBMR_15B02	125.477	b	a	a	b	a	a	b	a	b	b	a	b	a	b	b	b	a	b	b	b	-	b	a	b	a	a	b	a	b	b	a	b	a	a	a	a	b	b	b	b	a	a	a	b	b	b	a	b
BBMR_14I22	125.477	b	a	a	b	a	a	b	a	b	b	a	b	a	b	b	b	a	b	b	b	a	b	a	b	a	a	b	a	b	b	a	b	a	a	a	a	b	b	b	b	a	a	a	b	b	b	-	b
BBMR_15H13	125.477	b	a	a	b	a	a	b	a	b	b	a	b	a	b	b	b	a	b	b	b	a	b	a	b	a	a	b	a	b	b	a	-	a	a	a	a	b	b	b	b	a	a	a	b	b	b	a	b
group 18+19
ABMR_14P23	0	a	a	a	b	b	a	b	b	b	a	b	b	b	a	a	b	a	b	a	b	b	b	a	b	b	b	a	b	b	b	a	b	a	a	a	a	b	a	b	a	b	b	b	a	b	a	b	b
CBBMR_09L05	0	a	a	a	b	b	a	b	b	b	a	b	b	b	a	a	b	a	b	a	b	b	b	a	b	b	b	a	b	b	b	a	b	a	a	a	a	b	a	b	a	b	b	b	a	b	a	b	b
ABMR_02B16	0	a	a	a	b	b	a	b	b	b	a	b	b	b	a	a	b	a	b	a	b	b	b	a	b	b	b	a	b	b	b	a	-	a	a	a	a	b	a	b	a	b	b	b	a	b	a	b	b
CBBMR_09J03	3.429	a	a	a	b	b	a	b	b	b	a	b	a	b	a	a	b	a	b	a	b	b	b	a	b	b	b	a	b	b	b	a	b	a	a	a	b	b	a	b	a	b	b	b	a	b	a	b	b
AHMR_01I18	10.332	a	a	a	b	b	a	b	b	b	a	b	a	b	a	a	b	a	b	a	b	a	b	a	b	b	b	a	b	b	b	a	b	a	a	a	b	b	a	b	b	b	b	a	a	b	a	b	b
CAHMR_03N24	10.332	a	a	a	b	b	a	b	b	b	a	b	a	b	a	a	b	a	b	a	b	a	b	a	b	b	b	a	b	b	b	a	b	a	a	-	b	b	a	-	b	b	b	a	a	b	a	b	b
CAHMR_08B22	15.531	b	a	a	b	b	a	b	b	b	a	b	a	b	a	a	b	a	b	a	b	a	b	a	b	b	b	a	b	a	b	a	b	a	a	a	b	b	a	b	b	b	b	a	a	a	a	b	b
CBHMR_12H11	18.995	b	a	a	b	b	a	b	b	b	a	b	a	b	a	a	b	a	b	a	b	a	b	a	b	b	b	a	b	a	b	a	b	a	a	a	b	b	a	b	b	b	b	a	a	a	a	b	b
AEGAMpCA_454	27.877	b	a	a	b	b	b	b	b	b	a	b	a	b	a	a	a	b	b	a	b	a	b	a	b	b	b	a	b	a	b	a	b	a	a	a	b	a	a	b	b	b	b	a	a	a	a	a	b
AEGAMpAG_672	31.497	b	b	a	b	b	b	b	b	b	-	b	a	b	a	a	a	b	b	a	b	a	b	a	b	b	b	a	b	a	b	a	b	a	a	a	b	a	a	b	b	b	b	a	a	a	a	a	b
ABMR_09I04	50.01	b	b	a	a	a	b	b	b	b	a	b	a	a	a	a	a	b	a	a	b	a	a	a	b	b	b	a	b	a	b	a	b	a	b	a	b	a	a	a	b	b	b	a	b	a	a	a	a
ABMR_10M06	50.01	b	b	a	a	a	b	b	b	b	a	b	a	a	a	a	a	b	a	a	b	a	a	a	b	b	b	a	b	a	b	a	b	a	b	a	b	a	a	a	b	b	b	a	b	a	a	a	a
ABMR_16D05	50.01	b	b	a	a	a	b	b	b	b	a	b	a	a	a	a	a	b	a	a	b	a	a	a	b	b	b	a	b	a	b	a	b	a	b	a	b	a	a	a	b	b	b	a	b	a	a	a	a
AEATMpCG_311	50.01	b	b	a	a	a	b	b	b	b	a	b	a	a	a	a	a	b	a	a	b	a	a	a	b	b	b	a	b	a	b	a	b	a	b	a	b	a	a	a	b	b	b	a	b	a	a	a	a
AEGGMpAT_596	50.01	b	b	a	a	a	b	b	b	b	a	b	a	a	a	a	a	b	a	a	b	a	a	a	b	b	b	a	b	a	b	a	b	a	b	a	b	a	a	a	b	b	b	a	b	a	a	a	a
ABMR_10E24	50.01	b	b	a	a	a	b	b	b	b	a	b	a	a	a	a	a	b	a	a	b	a	a	a	b	b	b	a	b	a	b	a	b	a	b	a	b	a	a	a	b	b	-	a	b	a	a	a	a
ABMR_13H16	50.01	b	b	a	a	a	b	b	b	b	a	b	a	a	a	a	a	b	a	a	b	a	a	a	b	b	b	a	b	a	b	a	b	a	b	a	b	a	a	-	b	b	b	a	b	a	a	a	a
AEGTMpAT_400	50.01	b	b	a	a	a	b	b	b	b	a	b	a	a	a	a	a	b	a	a	b	a	a	a	b	b	b	a	b	a	b	a	-	a	b	a	b	a	a	a	b	b	b	a	b	a	a	a	a
ABMR_01O23	51.474	-	b	a	a	a	b	b	b	b	a	b	a	a	a	a	a	-	a	a	b	a	a	a	b	b	b	b	b	a	b	a	b	a	-	a	b	a	a	a	b	b	b	a	b	a	a	a	a
AEATMpCG_201	55.185	b	b	a	a	a	b	b	b	b	a	b	a	a	a	a	a	b	a	a	b	a	a	a	b	b	b	b	b	a	b	a	b	a	b	a	b	a	b	a	b	b	b	a	b	b	a	a	a
BEGAMpCA_254	55.185	b	b	a	a	a	b	b	b	b	a	b	a	a	a	a	a	b	a	a	b	a	a	a	b	b	b	b	b	a	b	a	b	a	b	a	b	a	b	a	b	b	b	a	b	b	a	a	a
BEGAMpCG_206	55.185	b	b	a	a	a	b	b	b	b	a	b	a	a	a	a	a	b	a	a	b	a	a	a	b	b	b	b	b	a	b	a	b	a	b	a	b	a	b	a	b	b	b	a	b	b	a	a	a
ABMR_10P06	56.904	b	b	a	a	a	b	b	b	b	a	b	a	a	a	a	a	b	a	a	b	a	a	a	b	b	b	b	b	a	b	a	b	a	b	a	b	a	b	a	b	b	b	a	b	b	b	a	a
AEGAMpCC_253	56.904	b	b	a	a	a	b	b	b	b	a	b	a	a	a	a	a	b	a	a	b	a	a	a	b	b	b	b	b	a	b	a	b	a	b	a	b	a	b	a	b	b	b	a	b	b	b	a	a
AHMR_11L05	56.904	b	b	a	a	a	b	b	b	b	a	b	a	a	a	a	a	b	a	a	b	a	a	a	b	b	b	b	b	a	b	a	b	a	b	a	b	a	b	a	b	b	b	a	b	b	b	a	a
AHMR_01I02	56.904	-	b	a	a	a	b	b	b	b	a	b	a	a	-	a	a	b	a	-	b	a	a	a	b	b	b	b	b	a	b	a	b	a	b	-	b	a	b	a	b	b	b	a	b	b	b	a	a
ABMR_07J01	58.621	b	b	a	a	a	b	b	b	b	a	b	a	a	a	b	a	b	a	a	b	a	a	a	b	b	b	b	b	a	b	a	b	a	b	a	b	a	b	a	b	b	b	a	b	b	b	a	a
ABMR_07O04	58.621	b	b	a	a	a	b	b	b	b	a	b	a	a	a	b	a	b	a	a	b	a	a	a	b	b	b	b	b	a	b	a	b	a	b	a	b	a	b	a	b	b	b	a	b	b	b	a	a
ABMR_05I17	69.227	b	a	a	a	a	b	a	b	b	a	b	a	a	a	b	a	b	a	a	a	a	a	a	a	b	b	b	b	a	b	a	b	a	b	a	b	a	b	a	b	b	b	a	b	b	b	b	a
AHMR_12F24	69.227	b	a	a	a	a	b	a	b	b	a	b	a	a	a	b	a	b	a	a	a	a	a	a	a	b	b	b	b	a	b	a	b	a	b	a	b	a	b	a	b	b	b	a	b	b	b	b	a
CBBMR_13P16	78.293	b	a	a	a	a	b	a	b	b	a	b	a	a	b	b	a	b	a	a	a	a	a	a	a	b	b	b	b	b	b	a	a	a	b	a	b	a	b	a	b	b	b	a	b	b	b	b	a
AHMR_02F14	83.671	b	a	a	a	a	b	a	b	b	a	b	a	a	b	b	a	b	a	a	a	a	a	a	a	a	b	b	b	b	b	a	a	a	b	a	b	b	a	a	b	b	b	a	b	b	b	b	a
AHMR_09F21	83.671	b	a	a	a	a	b	a	b	b	a	b	a	a	b	b	a	b	a	a	a	a	a	a	a	a	b	b	b	b	b	a	a	a	b	a	b	b	a	a	b	b	b	a	b	b	b	b	a
AHMR_15H06	83.671	b	a	a	a	a	b	a	b	b	a	b	a	a	b	b	a	b	a	a	a	a	a	a	a	a	b	b	b	b	b	a	a	a	b	a	b	b	a	a	b	b	b	a	b	b	b	b	a
CABMR_06P15	95.413	b	a	a	a	a	b	a	b	b	a	b	a	b	b	b	a	b	a	a	a	a	a	a	a	a	b	a	b	b	b	a	a	b	b	a	b	b	a	a	b	a	b	a	b	a	b	b	b
CABMR_07E19	95.413	b	a	a	a	a	b	a	b	b	a	b	a	b	b	b	a	b	a	a	a	a	a	a	a	a	b	a	b	b	b	a	a	b	b	a	b	b	a	a	b	a	b	a	b	a	b	b	b
AEATMpCG_60	95.413	b	a	a	a	a	b	a	b	b	a	b	a	b	b	b	a	b	a	a	a	a	a	a	a	a	b	a	b	b	b	a	a	b	b	a	b	b	a	a	b	a	b	a	b	a	b	b	b
AEGCMpCA_269	95.413	b	a	a	a	a	b	a	b	b	a	b	a	b	b	b	a	b	a	a	a	a	a	a	a	a	b	a	b	b	b	a	a	b	b	a	b	b	a	a	b	a	b	a	b	a	b	b	b
BEGAMpCG_160	95.413	b	a	a	a	a	b	a	b	b	a	b	a	b	b	b	a	b	a	a	a	a	a	a	a	a	b	a	b	b	b	a	a	b	b	a	b	b	a	a	b	a	b	a	b	a	b	b	b
CAHMR_01A08	95.413	b	a	a	a	a	b	a	b	b	a	b	a	b	b	b	a	b	a	a	a	a	a	a	a	a	b	a	b	b	b	a	a	b	b	a	b	b	-	a	b	a	b	a	b	a	b	b	b
CAHMR_01C07	95.413	b	a	a	a	a	b	a	b	b	a	b	a	b	b	b	a	b	a	a	a	a	a	a	a	a	b	a	b	b	b	a	a	b	b	a	b	b	a	a	b	-	b	a	b	a	b	b	b
AHMR_04A05	95.413	b	a	a	a	a	b	a	b	b	a	b	a	b	b	b	a	b	a	a	a	a	a	a	a	a	b	a	b	b	b	a	a	b	b	a	b	b	-	a	b	a	b	a	b	a	b	b	b
CAHMR_05M17	95.413	b	a	a	a	a	b	a	b	b	a	b	a	b	b	b	a	b	a	a	a	a	a	a	a	a	b	a	b	b	b	a	a	b	b	-	b	b	a	a	b	a	b	a	b	a	b	b	b
ABMR_05G15	95.413	b	a	a	a	a	b	a	b	b	a	b	a	b	b	b	a	b	a	a	a	a	a	a	a	a	-	-	-	b	b	a	a	b	b	a	b	b	a	a	b	a	b	a	b	a	b	b	b
ABMR_12P05	97.117	b	a	a	a	a	b	a	b	b	a	b	a	b	b	b	a	b	a	a	a	a	a	a	a	a	b	a	b	b	b	a	a	b	b	a	b	b	a	a	b	a	b	a	b	a	b	b	b
BEGAMpAC_74	100.491	b	a	a	a	a	b	a	b	b	a	b	a	b	b	b	a	a	a	a	a	b	a	a	a	a	b	a	b	b	b	a	a	b	b	a	b	b	a	a	b	a	b	a	b	a	b	b	b
CAHMR_06G21	101.117	b	a	a	a	a	b	a	b	b	a	b	a	b	b	b	a	b	a	a	a	b	a	a	a	a	b	a	b	b	b	a	a	b	b	a	b	b	a	a	b	a	b	a	b	a	b	b	b
CAHMR_07P17	101.117	b	a	a	a	a	b	a	b	b	a	b	a	b	b	b	a	b	a	a	a	b	a	a	a	a	b	a	b	-	b	a	a	b	b	a	b	b	-	a	b	a	b	a	b	a	b	b	b
BEGAMpCG_143	102.581	b	a	a	a	a	b	a	b	b	a	b	a	b	b	b	a	b	a	a	a	b	a	a	a	a	b	a	b	b	b	a	a	b	b	a	b	b	a	a	b	b	b	a	b	a	b	b	b
ABMR_02C07	102.581	b	a	a	a	a	-	a	b	b	a	b	a	b	b	b	a	b	a	a	a	b	a	a	a	a	b	a	b	b	b	a	a	-	b	a	b	b	a	a	b	b	b	a	b	a	b	b	b
ABMR_03D20	117.107	b	a	b	a	a	b	a	b	b	a	b	a	b	b	b	b	b	a	a	a	b	a	a	a	a	b	a	b	b	b	a	a	b	b	b	a	b	a	b	b	b	b	a	b	a	b	b	b
ABMR_16L11	117.107	b	a	b	a	a	b	a	b	b	a	b	a	b	b	b	b	b	a	a	a	b	a	a	a	a	b	a	b	b	b	a	a	b	b	b	a	b	a	b	b	b	b	a	b	a	b	b	b
CAHMR_04G23	117.107	b	a	b	a	a	b	a	b	b	a	b	a	b	b	b	b	b	a	a	a	b	a	a	a	a	b	a	b	b	b	a	a	b	b	b	a	b	a	b	b	b	b	a	b	a	b	b	b
AEGGMpAT_195	124.364	b	a	b	a	a	b	a	b	b	a	b	a	b	b	b	b	b	a	a	a	b	a	a	b	a	b	a	b	b	b	a	a	b	b	b	a	b	a	b	b	b	b	a	a	a	b	b	b
CBHMR_10B07	130.028	b	a	b	a	a	a	a	b	b	a	b	a	b	b	b	b	b	a	b	a	b	a	a	b	a	b	a	b	b	b	a	a	b	b	b	a	b	a	b	a	b	b	a	a	a	b	b	b
CABMR_05B21	141.079	b	a	b	a	a	a	a	a	b	a	a	a	b	b	b	b	b	a	b	a	b	b	a	b	a	a	a	b	b	b	b	a	b	b	b	a	b	a	b	a	b	b	a	a	a	b	a	b
group 8
CBBMR_15B17	0	b	a	b	a	b	a	b	b	a	a	b	a	b	b	b	a	b	b	a	a	a	b	a	b	a	a	b	a	a	a	a	a	a	a	a	b	b	a	a	b	a	b	a	b	a	b	b	b
CBHMR_16D01	0	b	a	b	a	b	a	b	b	a	a	b	a	b	b	b	a	b	b	a	a	a	b	a	b	a	a	b	a	a	a	a	a	a	a	a	b	b	a	a	b	a	b	a	b	a	b	b	b
BEGAMpCC_390	6.681	b	a	b	a	b	b	b	b	a	a	b	a	b	b	b	a	b	b	a	b	a	b	a	b	a	a	b	a	a	a	a	b	a	a	a	b	b	a	a	b	a	b	a	b	-	b	b	b
AEGTMpAT_229	9.216	b	a	b	a	b	a	b	b	a	a	b	a	b	b	b	b	b	b	a	a	b	b	a	b	a	a	b	a	a	a	a	b	a	a	a	b	b	a	a	b	a	b	a	b	a	b	b	b
CAHMR_04F07	9.216	b	a	b	a	b	a	b	b	a	a	b	a	b	b	b	b	b	b	a	a	b	b	a	b	a	a	b	a	a	a	a	b	a	a	a	b	b	a	a	b	a	b	a	b	a	b	b	b
ABMR_12H10	10.61	b	a	b	a	b	b	b	b	a	a	b	a	b	b	b	b	b	b	a	a	b	b	a	b	a	a	b	a	a	a	a	b	a	a	a	b	b	a	a	b	a	b	a	b	a	b	b	b
ABMR_06E12	10.61	b	a	b	a	b	b	b	b	a	a	b	a	b	b	b	b	b	b	a	a	b	b	a	b	a	a	b	a	a	a	a	b	a	a	a	b	b	a	a	b	a	b	a	b	a	b	b	b
CAHMR_01F01	10.61	-	a	b	a	b	b	b	b	a	a	b	a	b	b	b	b	b	b	a	a	b	b	a	b	a	a	b	a	a	a	a	b	a	a	a	b	b	a	a	b	a	b	a	b	a	b	b	b
AEGAMpAG_174	13.585	b	a	b	a	b	b	b	b	a	a	b	a	b	b	b	b	b	b	a	b	b	b	a	b	a	a	b	a	a	a	b	b	a	a	a	b	b	a	a	b	a	b	a	b	a	b	b	b
CAHMR_03C06	17.039	b	a	a	a	b	b	b	b	a	a	b	a	b	b	b	b	b	b	a	b	b	b	a	b	a	a	b	a	a	b	b	b	a	a	a	b	b	a	a	b	a	b	a	b	a	b	b	b
ABMR_05L12	18.771	b	a	a	a	b	b	b	b	a	a	a	a	b	b	b	b	b	b	a	b	b	b	a	b	a	a	b	a	a	b	b	b	a	a	a	b	b	a	a	b	a	b	a	b	a	b	b	b
AEGAMpCA_80	18.771	b	a	a	a	b	b	b	b	a	a	a	a	b	b	b	b	b	b	a	b	b	b	a	b	a	a	b	a	a	b	b	b	a	a	a	b	b	a	a	b	a	b	a	b	a	b	b	b
CAHMR_08O16	29.372	b	a	a	a	b	b	b	b	a	a	a	a	b	b	b	b	b	b	a	b	b	b	a	b	a	a	b	a	b	b	b	b	b	a	a	a	b	a	a	b	a	b	a	b	a	b	b	b
AHMR_07L14	32.927	a	a	a	a	b	b	b	b	a	a	a	a	b	b	b	b	b	b	a	b	b	b	a	b	a	a	b	a	b	b	b	b	b	a	a	a	b	a	a	b	a	b	a	b	a	b	b	b
ABMR_08P12	32.927	a	a	a	a	b	-	b	b	a	a	a	a	b	b	b	b	b	b	a	b	b	b	a	b	a	a	b	a	b	b	b	b	b	a	a	a	-	a	a	b	a	-	a	b	a	b	b	b
CABMR_02P02	38.255	a	a	a	a	b	b	b	b	a	a	a	a	b	b	b	b	b	b	a	b	b	b	a	b	a	a	b	a	b	b	b	b	b	a	a	a	b	a	a	b	a	a	a	b	a	a	b	b
CABMR_07D02	38.255	a	a	a	a	b	b	b	b	a	a	a	a	b	b	b	b	b	b	a	b	b	b	a	b	a	a	b	a	b	b	b	b	b	a	a	a	b	a	a	b	a	a	a	b	a	a	b	b
AEGAMpCA_398	38.255	a	a	a	a	b	b	b	b	a	a	a	a	b	b	b	b	b	b	a	b	b	b	a	-	a	a	-	a	b	b	b	b	b	a	a	a	b	a	a	b	a	a	a	b	a	a	b	b
BBMR_13O01	40.562	a	a	a	a	b	b	b	b	a	a	a	a	b	b	b	a	b	b	a	b	a	b	a	b	a	a	b	a	b	b	b	b	b	a	a	a	b	a	a	b	a	a	a	b	a	a	b	b
CBBMR_11E02	40.562	a	a	-	a	b	b	b	b	a	a	a	a	b	b	b	a	b	b	a	b	a	b	a	b	a	a	b	a	b	b	b	b	b	a	a	a	b	a	a	b	a	a	a	b	a	a	b	b
AHMR_02E23	55.872	a	a	a	a	a	b	b	b	a	a	a	a	b	b	b	b	b	b	a	b	b	a	a	b	b	a	b	a	b	b	b	b	b	b	a	a	a	b	a	b	b	a	a	a	a	a	b	b
ac-0007	55.872	a	a	a	a	a	b	b	b	a	a	a	a	b	b	b	b	b	b	a	b	b	a	a	b	b	a	b	a	b	b	b	b	b	b	a	a	a	b	a	b	b	a	a	a	a	a	b	b
AHMR_04P14	55.872	a	a	a	a	a	b	b	b	a	a	a	a	b	b	b	-	b	b	a	b	b	a	a	-	b	a	b	a	b	b	b	-	b	b	a	a	a	b	a	b	b	a	a	a	a	a	b	b
AEGCMpCA_226	57.604	a	a	a	a	a	b	b	b	a	a	a	a	b	b	b	b	b	b	b	b	b	a	a	b	b	a	b	a	b	b	b	b	b	b	a	a	a	b	a	b	b	a	a	a	a	a	b	b
AHMR_02O19	59.345	a	a	a	a	a	b	b	b	a	a	a	a	b	b	b	b	b	a	b	b	b	a	a	b	b	a	b	a	-	b	b	b	-	b	a	a	a	b	a	b	-	a	a	a	a	a	b	b
ABMR_05N01	61.054	a	a	a	a	a	b	b	a	a	a	a	a	b	b	b	b	b	a	b	b	b	a	a	b	b	a	b	a	b	b	b	b	b	b	a	a	a	b	a	b	b	a	a	a	a	a	b	b
ABMR_06L11	61.054	a	a	a	a	a	b	b	a	a	a	a	a	b	b	b	b	b	a	b	b	b	a	a	b	b	a	b	a	b	b	b	b	b	b	a	a	a	b	a	b	b	a	a	a	a	a	b	b
AHMR_05P03	61.054	a	a	a	a	a	b	b	a	a	a	a	a	b	b	b	b	b	a	b	b	b	a	a	b	b	a	b	a	b	b	b	b	b	b	a	a	a	b	a	b	b	a	a	a	a	a	b	b
group 12
BHMR_04D05*	0	a	a	a	a	a	b	a	a	b	a	b	a	a	b	b	b	a	a	b	a	a	b	a	a	b	b	a	b	a	a	a	a	a	a	a	a	b	b	a	a	a	b	b	a	b	a	a	b
BEGTMpAT_240	1.727	a	a	a	a	a	b	a	a	b	a	b	a	a	b	b	b	a	a	b	a	a	b	a	a	b	b	a	b	a	a	a	a	a	a	a	a	b	b	a	a	a	b	b	a	b	a	a	b
CABMR_08E04	7.788	a	a	a	a	a	b	a	a	b	a	b	b	b	b	b	b	a	a	b	a	a	b	a	a	b	b	a	b	a	a	b	b	a	a	a	a	b	b	a	a	a	b	b	a	b	a	a	b
AHMR_03D07	7.788	a	a	a	a	a	b	a	a	b	a	b	b	b	b	b	b	a	a	b	a	a	b	a	a	b	b	a	b	a	a	b	b	a	a	a	a	b	b	a	a	a	b	b	a	b	a	a	b
CAHMR_04L02	7.788	a	a	a	a	a	b	a	a	b	a	b	b	b	b	b	b	a	a	b	a	a	b	a	a	b	b	a	b	a	a	b	b	a	a	a	a	b	b	a	a	a	b	b	a	b	a	a	b
AEGAMpAC_69	9.414	a	a	a	a	a	b	a	a	b	a	b	b	b	b	b	b	b	a	b	a	a	b	a	a	b	b	a	b	a	a	b	b	a	a	a	a	b	b	a	a	a	b	b	a	b	a	a	b
gga-0001	20.795	b	a	a	a	a	a	a	b	b	a	b	b	b	b	b	b	b	a	b	a	-	b	a	b	b	b	a	b	a	a	-	-	a	a	a	a	b	b	a	a	a	-	b	a	b	b	a	b
BEGAMpCG_95	27.571	b	a	a	a	a	a	a	b	b	a	b	a	a	b	b	b	b	a	b	a	a	b	a	b	b	a	a	b	a	a	a	a	a	a	a	a	b	b	a	b	a	b	a	a	b	b	a	b
CAHMR_05M06	53.218	b	a	a	a	b	a	a	b	b	a	b	b	b	a	b	b	b	a	b	b	a	b	a	b	b	a	a	b	a	a	b	b	a	b	a	b	a	b	b	b	b	b	a	b	b	b	b	b
ABMR_06H04*	58.369	b	a	a	a	b	a	a	b	b	b	b	b	b	a	b	b	b	a	b	b	a	b	a	b	b	a	b	b	a	a	b	b	a	b	a	b	a	b	b	b	b	b	a	b	b	b	b	b
CAHMR_02M02*	58.369	b	a	a	a	b	a	a	b	b	b	b	b	b	a	b	b	b	a	b	b	a	b	a	b	b	a	b	b	a	a	b	b	a	b	a	b	a	b	b	b	b	b	a	b	b	b	b	b
group 11+20
ABMR_01G03	0	b	a	b	a	a	a	a	b	a	b	a	b	b	b	b	a	b	b	a	a	b	b	a	b	a	a	a	b	b	b	b	a	a	a	b	a	a	a	b	a	b	b	a	a	a	a	b	a
CABMR_01O17	0	b	a	b	a	a	a	a	b	a	b	a	b	b	b	b	a	b	b	a	a	b	b	a	b	a	a	a	b	b	b	b	a	a	a	b	a	a	a	b	a	b	b	a	a	a	a	b	a
AEGTMpAT_366	0	b	a	b	a	a	a	a	b	a	b	a	b	b	b	b	a	b	b	a	a	b	b	a	b	a	a	a	b	b	b	b	a	a	a	b	a	a	a	b	a	b	b	a	a	a	a	b	a
CBHMR_10E06	0	b	a	b	a	a	a	a	b	a	b	a	b	b	b	b	a	b	b	a	a	b	b	a	b	a	a	a	b	b	b	b	a	a	a	b	a	a	a	b	a	b	b	a	a	a	a	b	a
BHMR_11J10	0	b	a	b	a	a	a	a	b	a	b	a	b	b	b	b	a	b	b	a	a	b	b	a	b	a	a	a	b	b	b	b	a	a	a	b	a	a	a	b	a	b	b	a	a	a	a	b	a
gca-0008	0	b	a	b	a	a	a	a	b	a	b	a	b	b	b	b	a	b	b	a	a	b	b	a	b	a	a	a	b	b	b	b	a	a	a	b	a	a	a	b	a	b	b	a	a	a	a	b	a
AHMR_11F12	0	b	a	b	a	a	a	a	b	a	b	a	b	b	b	b	a	b	b	a	a	b	b	-	b	a	a	a	b	b	b	b	a	a	a	b	a	a	a	b	a	b	b	a	a	a	a	b	a
BHMR_10D06	0	b	a	b	a	a	a	a	b	a	b	a	b	b	b	b	a	b	b	a	a	b	-	a	b	a	a	a	b	b	b	b	a	a	a	b	a	-	a	b	a	b	b	a	a	a	a	b	a
ABMR_08J09	0	b	a	b	a	a	a	a	b	a	b	a	b	b	b	b	a	b	b	a	a	b	b	a	b	a	a	a	b	b	b	b	a	a	a	b	a	a	a	b	a	b	-	a	a	a	a	b	a
CAHMR_08O05	0	b	a	b	a	a	a	a	b	a	b	a	-	b	b	b	a	b	b	a	a	b	b	a	b	a	a	a	b	b	b	b	-	a	-	b	a	a	a	b	a	b	b	a	a	a	a	b	a
CABMR_01N02	1.713	b	a	b	a	a	a	a	b	a	b	a	b	b	b	b	a	b	b	a	a	b	b	a	b	a	a	a	b	b	b	b	a	a	a	b	a	b	a	b	a	b	b	a	a	a	a	b	a
AEGGMpCG_96	1.713	b	a	b	a	a	a	a	b	a	b	a	b	b	b	b	a	b	b	a	a	b	b	a	b	a	a	a	b	b	b	b	a	a	a	b	a	b	a	b	a	b	b	a	a	a	a	b	a
AHMR_03O11	1.713	b	a	b	a	a	a	a	b	a	b	a	b	b	b	b	a	b	b	a	a	b	b	a	b	a	a	a	b	b	b	b	a	a	a	b	a	b	a	b	a	b	b	a	a	a	a	b	a
AEGAMpCA_474	3.366	b	a	b	a	a	a	a	b	a	b	a	b	b	b	b	a	b	b	a	-	b	b	a	b	a	a	a	b	b	b	b	a	a	a	b	a	b	a	b	a	b	b	b	a	a	a	b	a
BEGAMpAC_343	4.195	b	a	b	a	a	a	a	b	a	b	a	b	b	b	b	a	a	b	a	a	b	b	a	b	a	a	a	b	b	b	b	a	a	a	b	a	b	a	b	a	b	b	b	a	a	a	b	a
AEGAMpCA_339	10.918	b	a	b	a	a	a	a	b	a	b	a	b	b	b	b	a	b	b	a	a	b	b	a	b	a	a	a	b	b	b	b	a	a	a	b	b	b	a	b	a	b	b	b	a	a	a	b	a
BEGAMpCA_342	10.918	b	a	b	a	a	a	a	b	a	b	a	b	b	b	b	a	b	b	a	a	b	b	a	b	a	a	a	b	b	b	b	a	a	a	b	b	b	a	b	a	b	b	b	a	a	a	b	a
CABMR_08L14	12.653	b	a	b	a	a	a	a	b	a	b	a	b	b	b	b	a	b	b	a	a	b	b	a	b	a	a	a	b	b	b	b	a	a	a	a	b	b	a	b	a	b	b	b	a	a	a	b	a
ABMR_08A01	14.382	b	a	b	a	a	a	a	b	a	b	a	b	b	b	b	a	b	b	a	a	b	b	a	b	a	a	a	b	b	b	b	a	a	a	a	b	b	a	b	a	b	b	b	a	a	a	b	a
AHMR_01N05	14.382	b	a	b	a	a	a	a	b	a	b	a	b	b	b	b	a	b	b	a	a	b	b	a	b	a	a	a	b	b	b	b	a	a	a	a	b	b	a	b	a	b	b	b	a	a	a	b	a
CAHMR_01N23	14.382	b	a	b	a	a	a	a	b	a	b	a	b	b	b	b	a	b	b	a	a	b	b	a	b	a	a	a	b	b	b	b	a	a	a	a	b	b	a	b	a	b	b	b	a	a	a	b	a
AHMR_05I19	14.382	b	a	b	a	a	a	a	b	a	b	a	b	b	b	b	a	b	b	a	a	b	b	a	b	a	a	a	b	b	b	b	a	a	a	a	b	b	a	b	a	b	b	b	a	a	a	b	a
CAHMR_08I14	14.382	b	a	b	a	a	a	a	b	a	b	a	b	b	b	b	a	b	b	a	a	b	b	a	b	a	a	a	b	b	b	b	a	a	a	a	b	b	a	b	a	b	b	b	a	a	a	b	a
CAHMR_08M22	14.382	b	a	b	a	a	a	a	b	a	b	a	b	b	b	b	a	b	b	a	a	b	b	a	b	a	a	a	b	b	b	b	a	a	a	a	b	b	a	b	a	b	b	b	a	a	a	b	a
BEGAMpCA_214	14.382	b	a	b	a	a	a	a	b	a	b	a	b	b	b	b	a	b	b	a	a	b	b	a	b	a	a	a	b	b	b	b	a	a	a	a	b	b	a	b	a	b	b	b	a	a	a	b	a
ABMR_13L11	14.382	b	a	b	a	a	a	a	b	a	b	a	b	b	b	b	a	b	-	a	a	b	b	a	b	a	a	a	b	b	b	b	a	a	a	a	b	b	a	b	a	b	b	b	a	a	a	b	a
AEGAMpAC_223	16.935	b	a	b	a	a	a	a	b	a	b	a	b	b	a	b	a	a	b	a	a	b	b	a	b	a	a	a	b	b	b	b	a	a	a	a	b	b	a	b	a	b	b	b	a	a	a	b	a
AHMR_16E22	26.726	b	a	b	b	a	a	a	b	b	a	b	a	b	-	b	a	b	b	a	a	b	b	a	b	a	a	a	b	b	b	b	a	a	a	a	b	b	a	b	a	b	b	b	a	a	a	a	a
ABMR_02F23	28.873	b	a	b	b	a	a	a	b	b	a	b	a	b	a	b	a	b	b	a	a	b	b	a	b	b	a	a	b	b	b	b	a	a	a	a	b	b	a	b	a	b	b	b	a	a	a	a	a
CAHMR_08I06	28.873	b	a	b	b	a	a	a	b	b	a	b	a	b	a	b	a	b	b	a	a	b	b	a	b	b	a	a	b	b	b	b	a	a	a	a	b	b	a	b	a	b	b	b	a	a	a	a	a
CABMR_04K10	28.873	b	a	b	b	a	a	a	b	b	a	b	a	b	a	b	a	b	b	a	a	b	b	a	b	b	a	a	b	b	b	b	a	a	a	a	b	b	a	b	a	b	b	b	a	a	a	a	a
ABMR_08O20	28.873	b	a	b	b	a	a	a	b	b	a	b	a	b	a	b	a	b	b	a	a	b	b	a	b	b	a	a	b	b	b	b	-	a	a	a	b	b	a	b	a	b	b	b	a	a	a	a	a
CABMR_08G14	32.44	b	b	b	b	a	a	a	b	b	a	b	a	b	a	b	a	b	b	a	a	b	b	a	b	b	a	a	b	b	b	-	a	a	a	a	b	b	a	b	a	b	b	b	a	b	a	a	a
CABMR_07L05	34.155	b	b	b	b	a	a	a	b	b	a	b	a	b	a	b	a	b	b	a	a	b	b	a	b	b	a	a	b	b	a	b	a	a	a	a	b	b	a	b	a	b	b	b	a	b	a	a	a
ABMR_14P09	34.155	b	b	b	b	a	a	a	b	b	a	b	a	b	a	b	a	b	b	a	a	b	b	a	b	b	a	a	b	b	a	b	a	a	a	a	b	b	a	b	a	b	b	b	a	b	a	a	a
CAHMR_08L13	34.155	b	b	b	b	a	a	a	b	b	a	b	a	b	a	b	a	b	b	a	a	b	b	a	b	b	a	a	b	b	a	b	a	a	a	a	b	b	a	b	a	b	b	b	a	b	a	a	a
CBHMR_16N16	34.155	b	b	b	b	a	a	a	b	b	a	b	a	b	a	b	a	b	b	a	a	b	b	a	b	b	a	a	b	b	a	b	a	a	a	a	b	b	a	b	a	b	b	b	a	b	a	a	a
CAHMR_08H09	34.155	b	b	b	b	a	a	a	b	b	a	b	a	b	a	b	a	b	b	a	a	b	b	a	b	b	a	a	b	b	a	b	a	a	a	a	b	b	-	b	a	b	b	b	a	b	a	a	a
CAHMR_07G23	34.155	b	b	b	b	a	a	a	b	b	a	b	a	b	a	b	a	b	b	a	a	b	b	a	b	b	a	a	b	-	a	b	a	a	a	a	b	b	a	b	a	-	b	b	a	b	a	a	a
AHMR_14A15	34.155	b	b	-	-	a	a	a	b	b	a	b	a	b	a	b	a	b	b	a	a	b	b	a	b	b	a	a	b	b	a	b	a	a	a	a	b	b	a	b	a	b	b	b	a	b	a	a	a
AHMR_05D18	34.155	b	b	b	b	a	a	a	-	b	a	b	-	b	a	b	a	b	b	a	a	b	b	a	b	b	a	a	b	b	a	b	a	a	a	a	b	-	a	b	a	b	b	b	a	b	a	a	a
BEATMpCG_465	55.523	-	b	b	b	a	a	a	b	b	a	b	a	b	b	b	a	b	b	a	a	b	b	a	b	b	a	a	b	b	a	b	b	a	-	a	b	a	a	a	a	a	b	b	b	b	a	a	b
ABMR_01C09	58.495	a	b	b	b	a	a	a	b	b	a	b	a	b	b	b	a	b	b	a	a	b	b	a	b	b	a	a	b	b	a	b	b	a	a	a	b	a	a	b	a	a	b	b	b	b	a	a	b
ABMR_11E14	58.495	a	b	b	b	a	a	a	b	b	a	b	a	b	b	b	a	b	b	a	a	b	b	a	b	b	a	a	b	b	a	b	b	a	a	a	b	a	a	b	a	a	b	b	b	b	a	a	b
ABMR_05J23	65.661	a	b	b	b	a	a	b	b	b	a	b	a	b	b	b	a	b	b	a	a	a	b	a	a	b	a	a	b	a	a	b	b	a	a	a	b	a	a	b	a	a	b	b	b	b	a	a	b
ABMR_13P06	65.661	a	b	b	b	a	a	b	b	b	a	b	a	b	b	b	a	b	b	a	a	a	b	a	a	b	a	a	b	a	a	b	b	a	a	a	b	a	a	b	a	a	b	b	b	b	a	a	b
gaa-0001	69.998	a	b	b	b	a	a	b	b	-	a	a	-	a	b	b	a	b	b	a	a	a	b	a	a	b	a	a	a	a	a	b	b	a	a	b	b	a	a	b	a	a	-	b	b	b	a	a	b
ABMR_07L14	71.32	a	b	b	b	a	a	b	b	b	a	a	a	a	b	b	a	b	b	a	a	a	b	a	a	b	a	a	b	a	a	b	b	a	a	b	b	a	a	b	a	a	b	b	b	b	a	a	b
ABMR_14J13	71.32	a	b	b	b	a	a	b	b	b	a	a	a	a	b	b	a	b	b	a	a	a	b	a	a	b	a	a	b	a	a	b	b	a	a	b	b	a	a	b	a	a	b	b	b	b	a	a	b
AHMR_10J22	71.32	a	b	b	b	a	a	b	b	b	a	a	a	a	b	b	a	b	b	a	a	a	b	a	a	b	a	a	b	a	a	b	b	a	a	b	b	a	a	b	a	a	b	b	b	b	a	a	b
BEATMpCG_82	71.32	a	b	b	b	a	a	b	b	b	a	a	a	a	b	b	a	b	b	a	a	a	b	a	a	b	a	a	b	a	a	b	b	a	a	b	b	a	a	b	a	a	b	b	b	b	a	a	b
CBHMR_16H17	71.32	a	b	b	b	a	a	b	b	b	a	a	a	a	b	b	a	b	b	a	a	a	b	a	a	b	a	a	b	a	a	b	b	a	a	b	b	a	a	b	a	a	b	b	b	b	a	a	b
AHMR_12B02	71.32	a	b	b	b	a	a	b	b	b	a	a	a	a	b	b	a	b	b	-	a	a	b	a	-	b	a	a	b	a	a	b	b	a	a	b	b	a	-	b	a	a	b	b	b	b	a	a	b
ABMR_05J13	73.059	a	b	b	b	a	a	b	b	b	a	a	a	a	b	b	a	b	b	a	b	a	b	a	a	b	a	a	b	a	a	b	b	a	a	b	b	a	a	b	a	a	b	b	b	b	a	a	b
BEGAMpAC_129	74.06	a	b	b	b	a	a	b	b	b	a	a	a	a	b	b	a	a	b	a	b	a	b	a	a	b	a	a	b	a	a	b	b	a	a	b	b	a	a	b	a	a	b	b	b	b	a	a	b
AEGTMpAT_345	78.571	a	b	b	b	a	a	b	b	b	a	a	a	a	b	b	a	b	b	a	b	a	b	a	a	b	a	a	b	a	a	b	b	a	a	b	b	a	a	b	b	a	b	a	b	b	a	a	b
CBHMR_13K14	78.571	a	b	b	b	a	a	b	b	b	a	a	a	a	b	-	a	b	b	a	b	a	b	a	a	b	a	a	b	a	a	b	b	a	a	b	b	a	a	b	b	a	b	a	b	b	a	a	b
AHMR_08K21	78.571	a	b	b	b	a	a	b	b	b	-	-	a	a	b	-	a	b	b	a	b	a	b	a	a	b	a	a	b	a	a	b	b	a	a	b	b	a	a	b	b	a	b	a	b	b	a	a	b
AHMR_04D09	80.301	a	b	b	b	a	a	b	b	b	a	a	a	a	b	a	a	b	b	a	b	a	b	a	a	b	a	a	b	a	a	b	b	a	a	b	b	a	a	b	b	a	b	a	b	b	a	a	b
AHMR_05H18	80.301	a	b	b	b	a	a	b	b	b	a	a	a	a	b	a	a	b	b	a	b	a	b	a	a	b	a	a	b	a	a	b	b	a	a	b	b	a	a	b	b	a	b	a	b	b	a	a	b
AHMR_14F04	80.301	a	b	b	b	a	a	b	b	b	a	a	a	a	b	a	a	b	b	a	b	a	b	a	a	b	a	a	b	a	a	b	b	a	a	b	b	a	a	b	b	a	b	a	b	b	a	a	b
CBHMR_09M03	80.301	a	b	b	b	a	a	b	b	b	a	a	a	a	b	a	a	b	b	a	b	a	b	a	a	b	a	a	b	a	a	b	b	a	a	b	b	a	a	b	b	a	b	a	b	b	a	a	b
ABMR_01N13	80.301	a	b	b	b	a	a	b	-	b	a	a	a	a	b	a	a	b	b	a	b	a	b	a	a	b	a	a	b	a	a	b	b	a	a	b	b	a	a	b	b	a	b	-	b	b	a	a	-
CBHMR_16E04	80.301	a	b	b	b	a	a	b	b	b	a	a	a	a	-	a	a	-	-	a	b	a	b	a	a	b	a	a	b	a	a	b	b	a	a	-	b	a	a	b	b	a	b	a	b	b	a	a	b
AHMR_16G02	80.301	a	b	b	b	a	a	b	b	b	a	a	a	a	b	a	-	b	-	a	b	a	b	a	-	b	a	-	b	a	a	b	-	a	a	b	b	a	a	b	b	a	b	a	b	b	a	a	b
group F
CBBMR_15O14	0	b	b	a	a	a	a	a	a	a	a	b	b	b	a	a	a	a	b	a	b	a	a	a	a	b	b	a	b	b	a	b	b	a	b	b	b	b	a	b	b	b	a	a	a	a	a	b	a
BHMR_08K20	0	b	b	a	a	a	a	a	a	a	a	b	b	b	a	a	a	a	b	a	b	a	a	a	a	b	b	a	b	b	a	b	b	a	b	b	b	b	a	b	b	b	a	a	a	a	a	b	a
CBBMR_10B23	0	b	b	a	a	a	a	a	a	a	a	b	b	b	a	a	a	-	b	a	b	a	a	a	a	b	b	a	b	b	a	b	b	a	b	b	b	b	a	b	b	b	a	a	a	a	-	b	a
AHMR_04A16	0	-	b	a	a	a	a	a	a	a	a	b	b	b	a	a	a	a	b	a	b	a	a	a	a	b	b	a	b	b	a	b	b	-	b	b	b	b	-	b	b	b	a	a	a	a	a	b	a
AHMR_15O23	0	b	b	a	a	a	a	a	a	a	a	b	b	b	a	a	a	a	b	a	b	a	a	a	a	b	b	a	b	b	a	b	b	a	b	b	b	b	-	b	b	b	a	-	a	a	a	b	-
AEGTMpAT_655	14.863	b	b	a	a	a	a	a	b	a	b	b	b	b	a	b	a	a	b	a	b	a	a	a	b	-	b	a	b	b	a	a	a	a	b	b	b	b	a	b	b	b	a	a	a	a	a	b	a
ABMR_04O20	18.406	b	b	a	a	b	a	a	b	a	b	b	b	b	a	b	a	a	b	a	b	a	a	a	b	a	b	a	b	b	a	a	a	a	b	b	b	b	a	b	b	b	a	a	a	a	a	b	a
CAHMR_08G14	18.406	b	b	a	a	b	a	a	b	a	b	b	b	b	a	b	a	a	b	a	b	a	a	a	b	a	b	a	b	b	a	a	a	a	b	b	b	b	a	b	b	b	a	a	a	a	a	b	a
ABMR_10O20	18.406	b	b	a	a	b	a	a	b	a	b	b	b	b	a	b	a	a	b	a	b	a	a	a	b	a	b	a	b	b	a	a	a	a	b	b	b	b	a	b	b	-	a	a	a	a	a	b	a
AHMR_09G13	20.092	b	b	a	a	b	a	a	b	a	b	b	b	b	a	b	a	b	b	a	b	a	a	a	b	a	b	a	b	b	a	a	a	a	b	b	b	b	a	b	b	b	a	a	a	a	a	b	a
ABMR_03H18	20.092	b	b	a	a	b	a	a	b	a	b	b	b	b	a	b	a	b	b	a	b	a	a	a	b	a	b	a	b	b	a	a	a	a	b	b	b	b	a	b	b	b	a	a	a	a	a	b	a
AHMR_12G20	20.092	b	b	a	a	b	a	a	b	a	-	-	b	b	a	b	a	b	b	a	b	a	a	a	b	a	b	a	b	b	a	a	a	a	b	b	b	b	a	b	b	b	a	a	a	a	a	b	a
group 23
AHMR_09E24	0	a	a	b	b	a	-	b	b	a	a	b	b	b	-	-	b	a	b	b	a	b	a	a	b	a	b	b	a	a	b	b	a	b	a	b	b	a	a	a	a	b	b	b	a	b	b	b	a
CABMR_07E18*	1.897	a	a	b	b	a	b	b	b	a	a	b	b	b	b	b	b	a	b	b	a	b	a	a	b	a	b	b	a	a	b	b	a	b	a	b	b	a	a	a	a	b	b	b	a	b	b	b	a
ABMR_04M05*	1.897	a	a	b	b	a	b	b	b	a	a	b	b	b	-	b	b	a	b	b	a	b	a	a	b	a	b	b	a	a	b	b	a	b	a	b	b	a	a	a	a	b	b	b	a	b	b	b	a
BEGAMpCC_208*	12.862	-	a	b	b	a	b	a	b	a	a	b	b	a	b	b	b	a	b	b	a	b	a	a	b	a	b	b	a	a	b	b	a	b	a	b	b	a	a	b	b	b	a	b	a	b	b	b	b
ABMR_03J24*	26.033	a	a	b	b	b	b	a	b	a	a	a	b	a	b	b	b	a	b	b	b	b	a	a	b	a	b	b	a	a	b	b	a	b	b	b	a	a	a	b	b	b	a	b	b	b	b	b	b
AHMR_06O02**	27.753	a	a	b	b	b	b	a	b	-	a	a	b	a	b	b	b	a	b	b	b	b	a	-	b	a	b	b	a	a	b	b	a	b	b	b	a	a	a	b	b	b	a	b	b	b	b	b	b
ABMR_05N03**	32.729	a	a	b	b	b	b	a	b	a	a	a	b	a	b	b	b	b	b	b	b	b	a	a	b	a	b	b	a	a	b	b	a	a	b	b	a	a	a	b	b	a	a	b	b	b	b	b	b
ABMR_12F19**	32.729	a	a	b	b	b	b	a	b	a	a	a	b	a	b	b	b	b	b	b	b	b	a	-	b	a	b	b	a	a	b	b	a	a	b	b	a	a	a	b	b	a	a	b	b	b	b	b	b
CBBMR_16B03**	32.729	a	a	b	b	b	b	a	b	a	a	a	b	a	b	b	b	b	b	b	b	b	a	a	b	a	b	b	a	a	b	b	a	a	b	b	a	a	a	b	b	a	a	b	b	b	b	b	b
AHMR_10E11**	32.729	a	a	b	b	b	b	a	b	a	a	a	b	a	b	b	b	b	b	b	b	b	a	a	b	a	b	b	a	a	b	b	a	a	b	b	a	a	a	b	b	a	a	b	b	b	b	b	b
AEGTMpAT_676**	32.729	a	a	b	b	b	b	a	b	a	a	a	b	a	b	b	b	b	b	b	b	b	a	a	b	a	b	b	a	a	b	b	a	a	b	b	a	a	a	b	b	a	a	b	b	b	b	b	b
ABMR_10J13**	32.729	a	a	b	b	b	b	a	b	a	a	a	b	a	b	b	b	b	b	b	b	b	a	a	b	a	b	b	a	a	b	b	a	a	b	b	a	a	a	b	b	a	a	b	b	b	b	b	b
ABMR_02B03*	34.416	a	a	b	b	b	b	a	b	a	a	a	b	a	b	b	b	b	b	b	b	b	a	a	b	a	b	b	a	a	b	b	a	a	b	b	a	a	a	b	b	a	a	b	b	b	b	b	b
ABMR_03F13*	34.416	a	a	b	b	b	b	a	b	a	a	a	b	a	b	b	b	b	b	b	b	b	a	a	b	a	b	b	a	a	b	b	a	a	b	b	a	a	a	b	b	a	a	b	b	b	b	b	b
CABMR_05L23*	34.416	a	a	b	b	b	b	a	b	a	a	a	b	a	b	b	b	b	b	b	b	b	a	a	b	a	b	b	a	a	b	b	a	a	b	b	a	a	a	b	b	a	a	b	b	b	b	b	b
ABMR_06C21*	34.416	a	a	b	b	b	b	a	b	a	a	a	b	a	b	b	b	b	b	b	b	b	a	a	b	a	b	b	a	a	b	b	a	a	b	b	a	a	a	b	b	a	a	b	b	b	b	b	b
CABMR_08L05*	34.416	a	a	b	b	b	b	a	b	a	a	a	b	a	b	b	b	b	b	b	b	b	a	a	b	a	b	b	a	a	b	b	a	a	b	b	a	a	a	b	b	a	a	b	b	b	b	b	b
ABMR_10B21*	34.416	a	a	b	b	b	b	a	b	a	a	a	b	a	b	b	b	b	b	b	b	b	a	a	b	a	b	b	a	a	b	b	a	a	b	b	a	a	a	b	b	a	a	b	b	b	b	b	b
ABMR_14P21*	34.416	a	a	b	b	b	b	a	b	a	a	a	b	a	b	b	b	b	b	b	b	b	a	a	b	a	b	b	a	a	b	b	a	a	b	b	a	a	a	b	b	a	a	b	b	b	b	b	b
AEATMpAG_328*	34.416	a	a	b	b	b	b	a	b	a	a	a	b	a	b	b	b	b	b	b	b	b	a	a	b	a	b	b	a	a	b	b	a	a	b	b	a	a	a	b	b	a	a	b	b	b	b	b	b
ABMR_15D24*	34.416	a	a	b	b	b	b	a	b	a	a	a	b	a	b	b	b	b	b	b	b	b	a	-	b	a	b	b	a	a	b	b	a	a	b	b	a	a	a	b	b	a	a	b	b	b	b	b	b
ABMR_15I24	34.416	a	a	b	b	b	b	a	b	a	a	a	b	a	b	b	b	b	b	b	b	b	a	a	b	a	b	b	a	a	b	b	a	a	b	b	a	a	a	b	b	a	a	b	b	b	-	-	b
ABMR_15I13*	34.416	a	a	b	-	b	b	a	b	-	a	a	b	a	b	b	b	b	b	b	b	b	-	a	b	a	b	-	a	a	b	b	a	a	b	b	a	a	a	b	b	a	-	b	b	b	b	-	b
AEGAMpCC_64	42.893	a	b	b	b	b	b	a	b	a	a	a	b	a	b	b	b	b	b	a	b	b	a	a	b	a	b	b	a	a	b	a	a	a	b	b	a	a	a	b	b	a	a	b	b	b	b	b	b
AEGGMpCG_192	42.893	a	b	b	b	b	b	a	b	a	a	a	b	a	b	b	b	b	b	a	b	b	a	a	b	a	b	b	a	a	b	a	a	a	b	b	a	a	a	b	b	a	a	b	b	b	b	b	b
CBHMR_09I05	42.893	a	b	b	b	b	b	a	b	a	a	a	b	a	b	b	b	b	b	a	b	b	a	a	b	a	b	b	a	a	b	a	a	a	b	b	a	a	a	b	b	a	a	b	b	b	b	b	b
BEGAMpAC_334	42.893	a	b	b	b	b	b	a	b	a	a	a	b	a	b	b	b	b	b	a	b	b	a	a	b	a	b	b	a	a	b	a	a	a	b	b	a	a	a	b	b	a	a	b	b	b	b	b	b
CBHMR_09D14	42.893	a	b	b	b	b	b	a	b	a	a	a	b	a	b	b	b	b	b	a	b	b	a	a	b	a	b	b	a	a	b	a	a	a	b	b	-	a	a	b	b	a	a	b	b	b	b	b	b
CBHMR_16P06	42.893	a	b	b	b	b	b	a	b	-	a	a	b	a	b	b	b	b	b	a	b	b	a	a	b	a	b	b	a	a	b	a	a	a	b	b	a	a	a	b	b	a	a	b	b	b	b	b	b
BEGCMpCA_156**	42.893	a	b	b	b	b	b	-	b	a	a	a	b	a	b	b	b	b	b	a	b	b	-	-	b	a	b	b	-	a	b	-	a	-	b	b	a	a	a	b	b	a	a	b	b	b	b	b	b
ABMR_07A18	50.097	a	b	b	b	b	b	a	b	a	b	a	b	a	b	b	b	a	b	a	b	b	a	a	b	a	b	a	a	a	b	a	b	b	b	b	a	a	a	b	b	a	a	b	b	b	b	b	b
CAHMR_07D17	50.097	a	b	b	b	b	b	a	b	a	b	a	b	a	b	b	b	a	b	a	b	b	a	a	b	a	b	a	a	a	b	a	b	b	b	b	a	a	a	b	b	a	a	b	b	b	b	b	b
CABMR_01L15	50.097	a	b	b	b	b	b	a	b	a	b	a	b	a	b	b	b	a	b	a	b	b	a	a	b	a	b	a	a	a	b	a	b	-	b	b	a	a	a	b	b	a	a	-	b	b	b	b	b
AHMR_16O04	67.491	b	b	b	b	b	b	a	b	a	b	a	b	b	a	b	b	a	b	a	a	b	a	a	b	b	b	a	a	b	b	a	b	a	b	a	a	a	b	b	b	a	a	b	b	b	b	b	b
AEGTMpAT_81	71	b	b	b	b	b	b	a	b	a	b	a	a	b	a	b	b	a	b	a	a	b	a	a	b	b	b	a	a	b	b	a	b	a	b	a	a	a	b	b	b	a	a	a	b	b	b	b	b
AHMR_02O05	71	b	b	b	b	b	b	a	b	a	b	a	a	b	a	b	b	a	b	a	a	b	a	a	b	b	b	a	a	b	b	a	b	a	b	a	a	a	b	b	b	a	a	a	b	b	b	b	b
AHMR_06D23	71	b	b	b	b	b	b	a	b	a	b	a	a	b	a	b	b	a	b	a	a	b	a	a	b	b	b	a	a	b	b	a	b	a	b	a	a	a	b	b	b	a	a	a	b	b	b	b	b
AHMR_07N17	71	b	b	b	b	b	b	a	b	a	b	a	a	b	a	b	b	a	b	a	a	b	a	a	b	b	b	a	a	b	b	a	b	a	b	a	a	a	b	b	b	a	a	a	b	b	b	b	b
BBMR_16F24	71	b	b	b	b	b	b	a	b	a	b	a	a	b	a	b	b	a	b	a	a	b	a	a	b	b	b	a	a	b	b	a	b	a	b	a	a	a	b	b	b	a	a	a	b	b	b	b	b
BEGAMpAG_74	75.216	b	b	b	b	a	b	a	a	a	b	a	a	b	a	b	b	b	b	a	a	b	a	a	b	b	b	a	a	b	b	a	b	a	b	a	a	a	b	b	b	a	a	a	b	b	b	b	b
CABMR_03H14	82.602	b	b	b	a	a	b	a	a	a	b	a	a	b	a	b	b	a	b	a	a	b	a	a	b	b	b	a	a	b	b	a	b	b	b	a	a	b	b	b	b	a	a	a	b	b	b	b	b
BEGAMpAG_194	97.798	b	b	b	a	a	b	a	a	a	b	a	a	b	a	a	b	a	a	b	a	a	a	b	b	b	b	b	a	b	a	a	b	b	b	a	a	b	b	b	a	a	a	a	b	a	b	b	b
CABMR_03B13	99.273	b	b	b	a	a	b	a	a	a	b	a	a	b	a	a	b	a	a	b	a	a	a	b	b	b	b	b	a	b	a	a	b	b	b	a	a	b	b	b	b	a	a	a	b	a	b	b	b
ABMR_03D15	99.273	b	b	b	a	a	b	a	a	a	b	a	a	b	a	a	b	a	a	b	a	a	a	b	b	b	b	b	a	b	a	a	b	b	b	a	a	b	b	b	b	a	a	a	b	a	b	b	b
CABMR_07M04	99.273	b	b	b	a	a	b	a	a	a	b	a	a	b	a	a	b	a	a	b	a	a	a	b	b	b	b	b	a	b	a	a	b	b	b	a	a	b	b	b	b	a	a	a	b	a	b	b	b
AEATMpCG_279	99.273	b	b	b	a	a	b	a	a	a	b	a	a	b	a	a	b	a	a	b	a	a	a	b	b	b	b	b	a	b	a	a	b	b	b	a	a	b	b	b	b	a	a	a	b	a	b	b	b
AHMR_04J20	99.273	b	b	b	a	a	b	a	a	a	b	a	a	b	a	a	b	a	a	b	a	a	a	b	b	b	b	b	a	b	a	a	b	b	b	a	a	b	b	b	b	a	a	a	b	a	b	b	b
CBBMR_09C04	100.968	b	b	b	a	a	b	a	a	a	b	a	a	b	a	a	b	a	a	b	a	a	a	b	b	b	b	b	a	b	a	a	b	b	b	a	a	b	b	b	b	a	a	a	b	a	b	b	b
AHMR_11F08	100.968	b	b	b	a	a	b	a	a	a	b	a	a	b	-	a	b	a	a	b	a	a	a	b	b	b	b	b	a	b	a	a	b	b	b	a	a	b	b	b	b	a	a	a	b	a	b	b	b
CABMR_08K24	101.717	b	b	b	a	a	b	a	a	a	b	a	a	b	a	a	b	a	a	b	a	a	a	b	b	b	b	b	a	b	a	a	b	b	b	a	a	b	a	b	b	a	a	a	b	a	b	b	b
ABMR_02O22	101.717	b	b	b	a	a	b	a	a	a	b	a	a	b	a	a	b	a	a	b	a	a	a	b	b	b	b	b	a	b	a	a	b	b	b	a	a	b	a	b	b	a	a	a	-	a	b	b	b
ABMR_10C13	101.717	b	b	b	a	a	b	-	a	a	b	a	a	b	a	a	-	a	a	b	a	a	a	-	b	b	-	b	a	b	a	a	b	b	b	-	a	b	a	b	b	a	a	-	b	a	b	b	b
ABMR_14M17	102.803	b	b	a	a	a	b	a	a	a	b	a	a	b	a	a	b	a	a	b	a	a	a	b	b	b	b	b	a	-	-	-	b	b	b	a	a	b	b	b	b	a	a	a	b	a	b	b	b
AEGGMpCG_130	105.279	b	b	b	a	a	b	a	a	a	b	a	a	b	a	a	b	a	a	b	a	a	a	b	b	b	b	b	a	b	a	a	a	b	b	a	a	b	b	b	b	a	a	a	b	a	b	b	b
group 14
CABMR_04P01	0	a	a	b	a	a	b	a	b	b	a	b	a	a	b	b	a	a	b	a	a	b	a	a	b	a	a	a	a	a	b	b	b	a	a	b	a	a	b	b	a	b	a	b	b	a	b	a	a
ABMR_08K17	0	a	a	b	a	a	b	a	b	b	a	b	a	a	b	b	a	a	b	a	a	b	a	a	b	a	a	a	a	a	b	b	b	a	a	b	a	a	b	b	a	b	a	b	b	a	b	a	a
CBHMR_14N06	0	a	a	b	a	a	b	a	b	b	a	b	a	a	b	b	a	a	b	a	a	b	a	a	b	a	a	a	a	a	b	b	b	a	a	b	a	a	b	b	a	b	a	b	b	a	b	a	a
ABMR_14M03	0	a	a	b	a	a	b	a	b	b	a	b	a	a	-	b	a	a	b	a	a	b	a	a	b	a	a	a	a	a	b	b	b	a	a	b	a	a	b	b	a	b	a	b	b	a	b	a	a
AEGAMpAG_217	2.988	a	a	b	a	a	b	a	b	b	a	b	a	a	b	b	a	b	b	a	a	b	a	a	b	a	a	a	a	a	b	b	b	a	a	b	a	a	b	b	a	b	a	b	b	b	b	a	a
CAHMR_05O12	23.991	a	a	a	a	a	b	a	b	b	a	b	a	a	b	b	a	a	-	a	a	a	a	-	b	a	a	a	b	b	b	a	b	a	b	b	a	b	b	b	a	b	b	b	b	b	b	a	b
AHMR_11M02	25.516	a	a	a	a	a	b	a	b	b	a	b	a	a	b	b	a	a	b	a	a	a	a	a	b	a	a	a	b	b	b	a	b	-	b	b	a	b	a	b	a	b	b	b	b	b	b	a	b
AHMR_01D24	25.516	a	a	a	a	a	b	a	b	b	a	b	a	a	b	b	a	a	-	a	a	a	a	a	b	a	a	a	b	b	b	a	b	a	b	-	a	b	a	b	a	b	b	b	b	b	b	a	b
BEGGMpCG_248	27.31	a	a	a	a	a	b	a	b	b	a	b	a	a	b	b	a	a	b	a	a	a	a	a	b	a	a	a	b	b	b	a	b	a	b	b	a	b	a	b	a	b	b	b	b	b	b	b	b
ABMR_01A07	41.685	a	a	a	a	b	b	b	b	b	a	b	a	a	b	b	b	a	b	b	a	a	a	b	b	a	a	a	b	b	b	a	b	a	b	b	a	b	a	a	a	b	b	b	b	b	b	b	b
ABMR_01O06	41.685	a	a	a	a	b	b	b	b	b	a	b	a	a	b	b	b	a	b	b	a	a	a	b	b	a	a	a	b	b	b	a	b	a	b	b	a	b	a	a	a	b	b	b	b	b	b	b	b
ABMR_01O10	41.685	a	a	a	a	b	b	b	b	b	a	b	a	a	b	b	b	a	b	-	a	a	a	b	b	a	a	a	b	b	b	a	b	a	b	b	a	b	a	a	a	b	b	b	b	b	b	b	b
ABMR_14D06	41.685	a	a	a	a	b	b	b	b	b	a	b	a	a	b	b	b	a	b	b	a	a	a	b	b	a	a	a	b	b	b	a	b	a	b	b	a	b	a	a	a	b	b	b	b	b	b	b	b
gca-0010	49.631	a	a	a	a	b	b	b	b	a	a	b	a	a	b	b	b	a	b	b	a	a	a	b	b	a	a	a	b	b	a	a	b	a	b	b	a	b	a	a	a	a	b	b	b	a	b	b	b
AEGCMpCA_421	49.631	a	a	-	-	b	b	b	b	a	a	b	a	a	b	b	b	a	b	b	a	a	a	b	b	a	a	a	b	b	a	a	b	a	b	b	a	b	a	a	a	a	b	b	b	a	b	b	b
AEGGMpCG_188	51.294	a	a	a	a	b	b	b	b	a	b	b	a	a	b	b	b	a	b	b	a	a	a	b	b	a	a	a	b	b	a	a	b	a	b	b	a	b	a	a	a	a	b	b	b	a	b	b	b
AHMR_04F11	53.042	a	a	a	a	b	b	b	b	a	b	a	a	a	b	b	b	a	b	b	a	a	a	b	b	a	a	a	b	b	a	a	b	a	b	b	a	b	a	a	a	a	b	b	b	a	b	b	b
AHMR_04E11	53.042	a	a	a	a	b	b	b	b	a	b	a	a	a	b	b	b	a	b	b	a	a	a	b	b	a	a	a	b	b	a	a	b	a	b	b	a	b	a	a	a	a	b	b	b	a	b	b	b
AHMR_08O13	53.042	a	a	a	a	b	b	b	b	a	-	a	a	a	b	b	b	a	b	b	a	a	a	b	b	a	a	a	b	b	a	a	b	a	b	b	a	b	a	a	a	a	b	b	b	a	b	b	b
AHMR_15C12	53.042	a	a	a	a	b	b	b	b	a	b	a	a	a	b	b	b	a	b	b	a	-	a	b	b	a	a	a	b	b	a	a	b	a	b	b	a	b	a	a	a	a	b	b	b	a	b	b	b
ABMR_12B08	54.752	a	a	a	a	b	b	b	b	a	b	a	a	a	b	b	b	a	b	b	a	a	a	b	b	a	a	a	b	b	a	a	b	a	b	b	a	b	a	a	a	a	b	b	b	a	b	b	b
AHMR_03E01	54.752	a	a	a	a	b	b	b	b	a	b	a	a	a	b	b	b	a	b	b	a	a	a	b	b	a	a	a	b	b	a	a	b	a	b	b	a	b	a	a	a	a	b	b	b	a	b	b	b
CAHMR_05E03	54.752	a	a	a	a	b	b	b	b	a	b	a	a	a	b	b	b	a	b	b	a	a	a	b	b	a	a	a	b	b	a	a	b	a	b	b	a	b	a	a	a	a	b	b	b	a	b	b	b
CAHMR_07G08	54.752	a	a	a	a	b	b	b	b	a	b	a	a	a	b	b	b	a	b	b	a	a	a	b	b	a	a	a	b	b	a	a	b	a	b	b	a	b	a	a	a	a	b	b	b	a	b	b	b
BEGAMpCG_213	54.752	a	a	a	a	b	b	b	b	a	b	a	a	a	b	b	b	a	b	b	a	a	a	b	b	a	a	a	b	b	a	a	b	a	b	b	a	b	a	a	a	a	b	b	b	a	b	b	b
ABMR_05H19	54.752	a	a	a	a	b	b	b	b	a	b	a	a	a	b	b	b	a	b	b	a	a	a	b	b	a	a	a	b	b	a	a	b	a	b	b	a	b	a	a	a	a	b	b	b	a	b	b	b
ABMR_11H15	54.752	a	a	a	a	b	b	b	b	a	b	a	a	a	b	b	b	a	b	b	a	a	a	b	b	a	a	a	b	b	a	a	b	a	b	b	a	b	a	a	a	a	b	b	b	a	-	b	b
CAHMR_04I10	54.752	a	a	a	a	b	b	-	b	a	b	a	a	a	b	b	b	a	b	b	a	a	a	b	b	a	a	a	b	b	a	a	b	a	b	b	a	b	a	a	a	a	b	b	b	a	b	b	b
AHMR_05D19	54.752	a	a	a	a	b	b	b	b	a	b	a	a	a	-	b	b	a	b	b	a	a	a	b	b	a	a	a	b	b	a	a	b	a	b	b	a	b	a	a	a	a	b	b	b	a	b	b	b
AHMR_15J09	54.752	a	a	a	a	b	b	b	b	-	-	a	a	a	b	b	b	a	b	b	a	a	a	b	b	a	a	a	b	b	a	a	b	a	-	b	a	b	a	a	a	a	b	b	b	a	b	b	b
AEGGMpAT_278	57.784	a	a	a	a	b	b	b	b	a	b	a	a	a	a	b	b	a	b	b	a	a	a	b	b	a	a	a	b	b	a	a	b	a	b	b	a	b	a	a	a	b	b	b	b	a	b	b	b
AEGTMpAT_372	57.784	a	a	a	a	b	b	b	b	a	b	a	a	a	a	b	b	a	b	b	a	a	a	b	b	a	a	a	b	b	a	a	b	a	b	b	a	b	a	a	a	b	b	b	b	a	b	b	b
BEGGMpAT_112	57.784	a	a	a	a	b	b	b	b	a	b	a	a	a	a	b	b	a	b	b	a	a	a	b	b	a	a	a	b	b	a	a	b	a	b	b	a	b	a	a	a	b	b	b	b	a	b	b	b
CAHMR_07I22	61.214	a	a	a	a	b	b	b	b	a	b	a	a	a	a	b	b	a	b	b	a	a	a	b	b	b	a	a	b	b	a	a	b	b	b	b	a	b	a	a	a	b	b	b	b	a	b	b	b
CAHMR_05P09	61.214	a	a	a	a	b	b	b	b	a	b	a	a	a	a	b	b	a	b	b	a	a	a	b	-	b	a	a	b	b	a	a	b	b	b	b	a	b	a	a	a	b	b	b	b	a	b	b	b
CAHMR_07H22	61.214	a	a	a	a	b	b	b	b	a	b	a	a	a	a	b	b	a	b	b	a	a	a	b	b	b	a	a	b	b	a	a	-	b	b	b	a	b	a	a	a	b	b	b	b	a	b	b	b
CAHMR_02N09	61.214	a	a	a	a	b	b	b	b	a	b	a	a	a	a	b	b	a	-	b	a	a	a	b	b	b	a	a	b	b	a	a	b	-	b	b	a	b	a	a	a	b	b	b	b	a	b	b	b
CAHMR_08B17	61.214	a	a	a	a	b	b	b	b	a	b	a	a	a	a	b	b	a	b	b	a	a	-	b	b	b	a	a	b	b	a	a	b	-	b	b	a	b	a	a	a	b	b	b	b	a	b	b	b
CAHMR_05D06	61.214	a	a	a	a	b	b	b	b	a	-	a	a	a	a	b	b	a	b	b	a	a	a	b	b	b	a	-	b	b	a	a	b	b	b	-	a	b	a	a	a	b	-	b	b	a	b	b	b
AHMR_16K20	62.901	a	a	a	a	b	b	b	b	a	b	a	a	a	a	b	b	a	b	b	a	a	a	b	b	b	a	a	b	b	a	a	b	b	b	b	a	b	a	a	a	b	b	b	b	a	b	b	b
BEGTMpAT_637	62.901	a	a	a	a	b	b	b	b	a	b	a	a	a	a	b	b	a	b	b	a	a	a	b	b	-	a	a	b	b	a	a	b	b	b	b	a	b	a	a	a	b	b	b	b	a	b	b	b
ABMR_04J07	67.97	a	a	a	a	b	b	b	b	a	b	a	a	a	a	b	b	a	b	a	a	a	a	b	b	b	a	a	b	b	a	a	a	b	b	b	a	b	a	a	a	b	b	b	b	a	b	b	b
AEATMpCG_106	67.97	a	a	a	a	b	b	b	b	a	b	a	a	a	a	b	b	a	b	a	a	a	a	b	b	b	a	a	b	b	a	a	a	b	b	b	a	b	a	a	a	b	b	b	b	a	b	b	b
AHMR_04I01	67.97	a	a	a	a	b	b	b	b	a	b	a	a	a	a	b	b	a	b	a	a	a	a	b	b	b	a	a	b	b	a	a	a	b	b	b	a	b	a	a	a	b	b	b	b	a	b	b	b
AHMR_10L17	67.97	a	a	a	a	b	b	b	b	a	b	a	a	a	a	b	b	a	b	a	a	a	a	b	b	b	a	a	b	b	a	a	a	b	b	b	a	b	a	a	a	b	b	b	b	a	b	b	b
AHMR_11B18	67.97	a	a	a	a	b	b	b	b	a	b	a	a	a	a	b	b	a	b	a	a	a	a	b	b	b	a	a	b	b	a	a	a	b	b	b	a	b	a	a	a	b	b	b	b	a	b	b	b
AHMR_13C23	67.97	a	a	a	a	b	b	b	b	a	b	a	a	a	a	b	b	a	b	a	a	a	a	b	b	b	a	a	b	b	a	a	a	b	b	b	a	b	a	a	a	b	b	b	b	a	b	b	b
ABMR_13I08	67.97	a	a	a	a	b	b	b	b	a	b	a	-	a	a	b	b	a	b	a	a	a	a	b	b	b	a	a	b	b	a	a	a	b	b	b	a	b	a	a	a	b	b	b	b	a	b	b	b
AHMR_05B09	67.97	a	a	a	a	b	b	b	b	a	-	a	a	a	a	b	b	a	b	a	a	a	a	b	-	b	a	a	b	b	a	a	a	b	b	-	a	b	a	a	a	b	b	b	b	a	b	b	b
ABMR_13O03	71.429	a	a	a	a	b	b	b	b	a	b	a	a	a	a	a	b	a	b	a	a	a	a	b	b	b	a	a	b	b	a	a	a	b	b	b	a	a	a	a	a	b	b	b	b	a	b	b	b
AHMR_04C19	71.429	a	a	a	a	b	b	b	b	a	b	a	a	a	a	a	b	a	b	a	a	a	a	b	b	b	a	a	b	b	a	a	a	b	b	b	a	a	a	a	a	b	b	b	b	a	b	b	b
AHMR_05I24	71.429	a	a	a	a	b	b	b	b	a	b	a	a	a	a	a	b	a	b	a	a	a	a	b	b	b	a	a	b	b	a	a	a	b	b	b	a	a	a	a	a	b	b	b	b	a	b	b	b
AHMR_14J04	71.429	a	a	a	a	b	b	b	b	a	b	a	a	a	a	a	b	a	b	a	a	a	a	b	b	b	a	a	b	b	a	a	a	b	b	b	a	a	a	a	a	b	b	b	b	a	b	b	b
AHMR_14P20	71.429	a	a	a	a	b	b	b	b	a	b	a	a	a	a	a	b	a	b	a	a	a	a	b	b	b	a	a	b	b	a	a	a	b	b	b	a	a	a	a	a	b	b	b	b	a	b	b	b
ABMR_03H10	76.282	a	a	a	a	b	b	b	b	a	b	a	a	a	a	a	b	a	b	a	a	a	a	b	b	b	b	a	b	b	a	a	a	b	b	a	a	a	a	a	a	a	b	b	b	a	b	b	b
AHMR_07L20	76.282	a	a	a	a	b	b	b	b	a	b	a	a	a	a	a	b	a	b	a	a	a	a	b	b	b	b	a	b	b	a	a	a	b	b	a	a	a	a	a	a	a	b	b	b	a	b	b	b
CBBMR_15P19	78.053	a	a	a	a	b	b	b	b	a	b	a	a	a	a	a	b	a	b	a	a	a	a	b	b	b	b	a	b	b	a	a	a	b	b	a	a	a	a	b	a	a	b	b	b	a	b	-	b
AEGAMpCG_326	92.621	a	a	a	a	b	b	a	b	a	b	a	a	a	a	a	b	a	b	a	a	a	b	b	a	b	b	a	b	b	b	a	a	b	b	a	a	a	a	a	b	a	a	b	b	a	b	a	b
AEGGMpAT_221	92.621	a	a	a	a	b	b	a	b	a	b	a	a	a	a	a	-	a	b	a	a	a	b	b	a	b	b	a	b	b	b	a	a	b	b	a	a	a	a	a	b	a	a	b	b	a	b	a	b
group 15
CBBMR_13A04	0	a	b	a	a	a	a	b	b	b	a	b	a	a	a	b	a	b	a	b	a	a	b	b	b	b	a	a	b	b	b	a	a	b	a	a	b	b	a	b	a	a	a	b	a	a	b	a	a
CABMR_01O19	5.083	a	b	a	a	a	a	b	b	a	a	b	a	b	a	b	a	b	a	b	a	a	b	b	b	b	a	a	b	b	b	a	a	b	a	a	b	b	a	b	a	b	a	b	a	a	b	a	a
BEGCMpCA_82	21.393	a	b	a	a	a	a	b	b	a	a	b	a	b	a	b	a	b	a	b	a	a	b	a	b	b	a	a	b	b	b	b	b	b	a	a	b	b	a	b	b	b	a	a	a	a	b	a	a
AHMR_03K19	37.867	a	a	a	a	a	a	b	b	a	a	b	b	b	b	b	a	b	b	a	a	a	b	a	a	b	a	a	b	b	b	b	b	b	a	a	b	a	a	b	b	b	a	a	a	a	b	a	a
AHMR_04E24	37.867	a	a	a	a	a	a	b	b	a	a	b	b	b	b	b	a	b	b	a	a	a	b	a	a	b	a	a	b	b	b	b	b	b	a	a	b	a	a	b	b	b	a	a	a	a	b	a	a
AHMR_09L16	37.867	a	a	a	a	a	a	b	b	a	a	b	b	b	b	b	a	b	b	a	a	a	b	a	a	b	a	a	b	b	b	b	b	b	a	a	b	a	a	b	b	b	a	a	a	a	b	a	a
AHMR_14N02	37.867	a	a	a	a	a	a	b	b	a	a	b	b	b	b	b	a	b	b	a	a	a	b	a	a	b	a	a	b	b	b	b	b	b	a	a	b	a	a	b	b	b	a	a	a	a	b	a	a
ABMR_08L18	37.867	a	a	a	a	a	a	b	b	a	a	b	b	b	b	b	a	b	b	a	a	a	b	a	a	b	a	a	b	b	b	b	b	b	a	a	b	a	a	b	b	b	a	a	a	a	b	a	a
AHMR_06K02	37.867	a	a	a	a	a	a	b	b	a	a	b	b	b	b	b	a	b	b	a	a	a	b	a	a	b	a	a	b	b	b	b	b	b	a	a	b	a	a	b	b	b	a	a	a	a	b	a	a
AHMR_02E17	37.867	a	a	a	a	a	a	b	b	a	a	b	b	b	-	b	a	b	b	a	a	a	b	a	a	b	a	a	b	b	b	b	b	b	-	-	b	a	a	b	b	b	a	a	a	a	b	a	a
AHMR_04M08	37.867	a	a	a	a	a	a	b	b	a	a	b	b	b	-	b	a	b	b	a	a	a	b	a	a	b	a	a	b	b	b	b	b	-	a	a	b	a	-	b	b	b	a	a	a	a	b	a	a
AEGGMpCG_456	42.195	a	a	a	a	a	a	b	b	a	a	b	b	b	b	b	a	b	b	a	a	a	b	a	a	b	a	a	b	b	b	b	a	b	a	b	b	a	a	b	b	b	a	a	a	b	b	a	a
ABMR_05P05	43.538	a	a	a	a	a	a	b	b	a	a	b	b	b	b	b	a	b	b	a	a	a	b	a	a	b	a	a	b	b	b	b	b	b	a	b	b	a	a	b	b	b	a	a	a	b	b	a	a
CBHMR_13F13	43.538	a	a	a	a	a	a	b	b	a	a	b	b	b	b	b	a	b	b	a	a	a	b	a	a	b	a	a	b	b	b	b	b	b	a	b	b	a	a	b	b	b	a	a	a	b	b	a	a
AHMR_07O03	43.538	a	a	a	a	a	a	b	b	a	a	b	b	b	b	b	a	b	b	a	a	a	b	a	a	b	a	a	b	b	b	b	b	-	a	b	b	a	a	b	b	b	a	a	a	b	b	a	a
BEGGMpCG_99	46.719	b	a	a	a	a	a	b	b	a	a	b	b	b	b	a	a	b	b	a	a	a	b	a	a	b	a	a	b	b	b	b	b	b	a	b	b	a	a	b	b	b	a	a	a	b	b	a	a
ABMR_13C19	47.44	b	a	a	a	a	a	b	b	a	a	b	b	b	b	a	a	b	b	a	a	a	b	a	a	b	a	a	b	b	b	b	b	b	a	b	b	a	a	b	b	b	a	a	a	b	b	a	a
CAHMR_03F08	47.44	b	a	a	a	a	a	-	b	a	a	b	b	b	b	a	a	b	b	a	a	a	b	a	a	b	a	a	b	b	b	b	b	-	a	b	b	a	a	b	b	b	a	a	a	b	b	a	a
BEATMpCG_313	48.345	b	a	a	a	a	a	b	b	a	a	b	b	b	b	a	a	b	b	a	a	a	b	a	a	b	a	a	b	b	b	b	b	b	a	b	b	a	a	a	b	b	a	a	a	b	b	a	a
ABMR_08G09	49.624	b	a	a	a	a	a	b	a	a	a	b	b	b	b	a	a	b	b	a	a	a	b	a	a	b	a	a	b	b	b	b	b	b	a	b	b	a	a	b	b	b	a	a	a	b	b	a	a
AEGAMpCG_356	49.624	b	a	a	a	a	a	b	a	a	a	b	b	b	b	a	a	b	b	a	a	a	b	a	a	b	a	a	b	b	b	b	b	b	a	b	b	a	a	b	b	b	a	a	a	b	b	a	a
CAHMR_03M24	49.624	b	a	a	a	a	a	b	a	a	a	b	b	b	b	a	a	b	b	a	a	a	b	a	a	b	a	a	b	b	b	b	b	b	a	b	b	a	a	b	b	b	a	a	a	b	b	a	a
CBHMR_09D13	49.624	b	a	a	a	a	a	b	a	a	a	b	b	b	b	a	a	b	b	-	a	a	b	a	a	b	a	a	b	b	b	b	b	b	a	b	b	a	a	b	b	b	a	a	a	b	b	a	a
CABMR_06K02	53.338	b	a	a	a	a	a	b	a	a	a	b	b	b	b	a	a	b	b	-	a	a	b	a	a	b	a	a	b	-	b	b	b	b	a	b	b	a	a	b	b	b	a	a	a	b	b	a	a
group 13
AEATMpAG_230	0	a	a	b	b	b	a	b	a	a	b	a	a	b	b	b	b	b	a	b	a	a	a	a	b	b	b	a	a	b	b	a	a	a	a	b	b	a	a	b	a	b	a	a	a	b	a	a	a
AEGAMpAG_337	8.986	a	a	b	b	a	a	b	b	-	b	a	a	b	b	b	a	a	a	b	a	a	a	a	b	b	b	b	a	b	b	a	a	a	a	b	a	a	a	b	a	b	b	a	a	b	a	a	a
AHMR_13E17	18.04	a	a	a	b	a	a	b	b	a	b	a	a	b	b	b	a	b	a	b	a	b	a	b	b	b	b	b	a	b	b	a	a	a	b	b	b	a	a	b	a	b	b	a	a	b	a	a	a
AHMR_15A17	18.04	a	a	a	b	a	a	b	b	a	b	a	a	b	b	b	a	b	a	b	a	b	a	b	b	b	b	b	a	b	b	a	a	a	b	b	b	a	a	b	a	b	b	a	a	b	a	a	a
CAHMR_04E23	18.04	a	a	a	b	a	a	b	b	a	b	a	a	b	b	b	a	b	a	b	a	b	a	b	b	b	b	b	a	b	b	a	a	a	b	b	b	a	a	b	a	b	b	a	a	-	a	a	a
CBBMR_10A19	20.384	a	a	a	b	a	a	b	b	b	b	a	a	b	b	b	a	b	a	b	a	b	a	b	b	b	b	b	a	b	b	a	a	a	b	b	b	a	a	b	a	b	b	a	a	a	a	a	a
CBBMR_16B20	20.384	a	a	a	b	a	a	b	b	b	b	a	a	b	b	b	a	b	a	b	a	b	a	b	b	b	b	b	a	b	b	a	a	a	b	b	b	a	a	b	a	b	b	a	a	a	a	-	a
CBHMR_11H24	20.384	a	a	a	b	a	a	b	b	b	b	a	a	b	b	b	a	b	a	b	a	b	a	b	b	b	b	b	a	b	b	a	a	a	b	b	b	a	a	b	a	b	b	a	a	a	a	a	a
CBHMR_13P14	23.609	a	a	a	b	a	a	b	b	b	b	a	a	b	b	a	a	b	a	b	a	b	a	b	b	b	b	b	a	b	b	a	a	a	b	b	b	a	a	b	a	b	b	a	a	a	a	a	a
CBHMR_11E02	23.609	a	a	a	b	a	a	-	b	b	b	a	a	b	b	a	a	b	a	b	a	b	a	b	b	b	b	b	a	b	b	a	a	-	b	b	b	a	a	b	a	b	b	a	a	a	a	a	a
ABMR_11O20	34.559	a	a	a	b	a	a	b	b	a	b	a	a	b	b	a	a	b	a	-	a	b	a	b	b	b	b	b	a	a	b	a	a	b	b	b	b	a	a	b	a	-	b	a	a	b	b	a	a
CABMR_01K07	42.067	a	a	a	b	a	a	b	b	a	b	a	a	b	b	a	a	b	a	b	b	b	a	b	b	b	b	b	a	a	b	a	a	b	b	b	b	a	a	b	b	a	a	a	a	b	b	a	a
AHMR_05O20	42.067	a	a	a	b	a	a	b	b	a	b	a	a	b	b	a	a	b	a	b	b	b	a	b	-	b	b	b	a	a	b	a	a	b	b	b	b	a	a	b	b	a	a	a	a	b	b	a	a
ABMR_02D07	42.067	a	a	a	b	a	a	b	b	a	b	a	a	b	b	a	a	b	a	b	b	b	a	b	b	b	b	b	a	a	b	a	a	b	b	b	b	a	a	b	b	a	a	a	a	b	b	a	a
AHMR_14L02	42.067	a	a	a	b	a	a	b	b	a	b	a	a	b	b	a	a	b	a	b	b	b	a	b	b	b	b	b	a	a	b	a	a	b	b	b	b	a	a	b	b	a	a	a	a	b	b	a	a
AHMR_07K15	42.067	a	a	a	b	a	a	b	b	a	b	a	a	b	b	a	a	b	a	b	b	b	a	b	b	b	b	b	a	a	b	a	a	b	b	b	b	a	a	b	b	a	a	a	a	b	b	a	a
CAHMR_07H13	42.067	a	a	a	b	a	a	b	b	a	b	a	a	b	b	a	a	b	a	b	b	b	a	b	b	b	b	b	a	a	b	a	a	b	b	b	b	a	a	b	b	a	a	a	a	b	b	a	a
AHMR_01I04	42.067	a	a	a	b	a	a	b	b	a	b	a	a	b	b	a	a	b	a	b	b	b	a	b	b	b	b	b	a	a	b	a	a	b	b	b	b	a	a	b	b	a	a	a	a	b	b	a	a
ABMR_16G16	42.067	a	a	a	b	a	a	b	b	a	b	a	a	b	b	a	a	b	a	b	b	b	a	b	b	b	b	b	a	a	b	a	a	b	b	b	b	a	a	b	b	a	a	a	a	b	b	a	a
ABMR_10E14	42.067	a	a	a	b	a	a	b	b	a	b	a	a	b	b	a	a	b	a	b	b	b	a	b	b	b	b	b	a	a	b	a	a	b	b	b	b	a	a	b	b	a	a	a	a	b	b	a	a
ABMR_09K12	42.067	a	a	a	b	a	a	b	b	a	b	a	a	b	b	a	a	b	a	b	b	b	a	b	b	b	b	b	a	a	b	a	a	b	b	b	b	a	a	b	b	a	a	a	a	b	b	a	a
ABMR_08L11	42.067	a	a	a	b	a	a	b	b	a	b	a	a	b	b	a	a	b	a	b	b	b	a	b	b	b	b	b	a	a	b	a	a	b	b	b	b	a	a	b	b	a	a	a	a	b	b	a	a
CABMR_06M10	42.067	a	a	a	b	a	a	b	b	a	b	a	a	b	b	a	a	b	a	b	b	b	a	b	b	b	b	b	a	a	b	a	a	b	b	b	b	a	a	b	b	a	a	a	a	b	b	a	a
ABMR_05N06	42.067	a	a	a	b	a	a	b	b	a	b	a	a	b	b	a	a	b	a	b	b	b	a	b	b	b	b	b	a	a	b	a	a	b	b	b	b	a	a	b	b	a	a	a	a	b	b	a	a
AEGAMpAC_147	43.759	a	a	a	b	a	a	b	b	a	b	a	a	b	b	a	a	a	a	b	b	b	a	b	b	b	b	b	a	a	b	a	a	b	b	b	b	a	a	b	b	a	a	a	a	b	b	a	a
group 16
AHMR_08D22	0	a	a	b	a	a	a	a	b	b	b	a	a	b	b	b	a	b	b	a	b	b	a	b	a	b	b	a	a	b	a	b	a	b	a	a	a	a	a	b	b	a	a	a	a	a	b	b	a
CABMR_06L08	4.359	a	b	a	a	a	a	a	b	b	b	a	a	b	b	b	a	b	b	a	b	a	a	b	a	b	b	a	a	b	a	b	a	b	a	a	a	a	a	b	b	a	a	a	a	a	b	b	a
CAHMR_02O22	4.359	a	b	a	a	a	a	a	b	b	b	a	a	b	b	b	a	b	b	a	b	a	a	b	-	b	b	a	a	b	a	b	a	b	a	a	a	a	a	b	b	a	a	a	a	a	b	b	a
Cag-0009	7.702	a	b	a	a	a	a	a	b	b	b	a	a	b	b	b	a	b	b	a	a	a	a	b	a	b	b	a	a	b	a	b	a	b	a	a	a	a	a	b	b	a	a	a	a	a	a	b	a
AEGGMpAT_356	9.373	a	b	a	a	a	a	a	b	b	b	a	a	b	b	b	a	b	b	a	a	a	a	b	a	b	b	a	a	b	a	b	a	b	a	a	a	a	a	b	b	a	a	a	a	a	a	b	a
AHMR_08H17	9.373	a	b	a	a	a	a	a	b	b	b	a	a	b	b	b	-	b	b	a	a	a	a	b	a	b	b	a	a	b	a	b	a	b	a	a	a	a	a	b	b	a	a	a	a	a	a	b	a
ABMR_07L04	11.044	a	b	a	a	a	a	a	b	b	b	a	a	b	b	b	a	b	b	a	a	a	a	b	a	b	b	a	a	b	a	b	a	b	a	a	a	a	a	b	b	a	a	a	a	a	a	b	a
ABMR_13C13	11.044	a	b	a	a	a	a	a	b	b	b	a	a	b	b	b	a	b	b	a	a	a	a	b	a	b	b	a	a	b	a	b	a	b	a	a	a	a	a	b	b	a	a	a	a	a	a	b	a
AEGCMpCA_160	11.044	a	b	a	a	a	a	a	b	b	b	a	a	b	b	b	a	b	b	a	a	a	a	b	a	b	b	a	a	b	a	b	a	b	a	a	a	a	a	b	b	a	a	a	a	a	a	b	a
AHMR_09C02	11.044	a	b	a	a	a	a	a	b	b	b	a	a	b	b	b	a	b	b	a	a	a	a	b	a	b	b	a	a	b	a	b	a	b	a	a	a	a	a	b	b	a	a	a	a	a	a	b	a
AHMR_12P10	11.044	a	b	a	a	a	a	a	b	b	b	a	a	b	b	b	a	b	b	a	a	a	a	b	a	b	b	a	a	b	a	b	a	b	a	a	a	a	a	b	b	a	a	a	a	a	a	b	a
AHMR_13H11	11.044	a	b	a	a	a	a	a	b	b	b	a	a	b	b	b	a	b	b	a	a	a	a	b	a	b	b	a	a	b	a	b	a	b	a	a	a	a	a	b	b	a	a	a	a	a	a	b	a
ABMR_06A11	11.044	a	b	a	a	a	a	a	b	b	b	a	a	b	b	b	a	b	b	a	-	a	-	b	a	b	b	a	a	b	a	b	a	b	a	a	a	a	a	b	b	a	a	a	a	a	a	b	a
CAHMR_03N21*	11.044	a	b	a	a	a	a	a	b	b	-	a	a	b	b	b	a	b	-	a	a	a	a	b	a	b	b	a	a	-	a	b	a	b	a	a	a	a	a	b	b	a	a	a	a	a	a	b	a
CMAT	11.044	a	b	-	a	a	a	a	b	b	-	a	-	b	b	b	a	b	b	a	a	a	-	b	a	b	b	a	a	b	-	b	a	b	a	a	-	a	a	-	b	a	a	a	a	a	a	-	a
CAHMR_07J01	12.51	a	b	b	a	a	a	a	b	b	b	a	a	b	b	b	a	b	b	a	a	a	a	b	a	b	b	a	a	b	a	b	a	b	a	a	a	a	a	b	b	a	a	a	a	a	a	b	a
AEGGMpCG_235*	21.217	a	b	b	a	a	a	a	a	b	b	a	a	b	a	b	a	b	b	a	a	a	a	b	a	b	b	b	a	b	a	b	a	a	a	a	a	a	a	b	b	a	a	a	a	a	a	b	a
BEGGMpAT_204*	21.217	a	b	b	a	a	a	a	a	b	b	a	a	b	a	b	a	b	b	a	-	a	a	b	a	b	b	b	a	b	a	b	a	a	a	a	a	a	a	b	b	a	a	a	a	a	a	b	a
CABMR_04O18**	22.956	a	b	b	a	a	a	a	a	b	b	a	a	b	a	b	a	b	b	a	a	a	a	b	a	b	b	b	a	b	a	b	a	a	a	a	a	a	a	b	b	a	a	a	a	a	a	b	a
CABMR_06N13**	22.956	a	b	b	a	a	a	a	a	b	b	a	a	b	a	b	a	b	b	a	a	a	a	b	a	b	b	b	a	b	a	b	a	a	a	a	a	a	a	b	b	a	a	a	a	a	a	b	a
AHMR_01A16**	22.956	a	b	b	a	a	a	a	a	b	b	a	a	b	a	b	a	b	b	a	a	a	a	b	a	b	b	b	a	b	a	b	a	a	a	a	a	a	a	b	b	a	a	a	a	a	a	b	a
CABMR_06L09**	29.967	b	b	b	a	a	a	a	a	b	b	a	a	b	a	b	a	b	b	a	a	a	b	a	a	b	b	b	a	b	a	b	a	a	a	a	a	a	a	b	b	a	a	a	a	a	a	b	a
CBBMR_09P05**	29.967	b	b	b	a	a	a	a	a	b	b	a	a	b	a	b	a	b	-	a	a	a	b	a	a	b	b	b	a	b	a	b	a	a	a	a	a	a	a	b	b	a	a	a	a	a	a	b	a
AHMR_14H13**	29.967	b	b	b	a	a	a	a	a	b	-	a	a	b	a	b	a	b	b	-	a	a	-	a	a	b	-	b	a	b	a	b	a	a	a	a	a	a	a	b	b	a	a	a	a	a	a	b	a
CBHMR_16L14*	29.967	b	b	b	a	a	a	a	a	b	b	a	a	b	-	b	a	b	b	a	a	a	b	a	-	b	b	b	a	b	a	b	a	a	a	a	a	a	a	b	b	a	a	a	a	a	a	b	a
CAHMR_07C05**	29.967	b	b	b	a	a	a	a	a	b	b	a	a	b	a	b	a	b	b	a	a	a	b	a	a	b	b	-	a	b	a	b	a	a	a	a	a	a	a	b	b	a	a	a	a	a	a	b	a
CBHMR_13N15**	29.967	b	b	b	a	a	a	a	a	b	b	a	a	b	a	b	a	b	b	a	a	a	b	a	a	b	b	b	a	b	a	b	a	a	a	a	a	a	a	b	b	a	a	a	a	a	a	b	a
CBHMR_10B06**	29.967	b	b	b	a	a	a	a	a	b	b	a	a	b	a	b	a	b	b	a	a	a	b	a	a	b	b	b	a	b	a	b	a	a	a	a	a	a	a	b	b	a	a	a	a	a	a	b	a
BHMR_06J05**	29.967	b	b	b	a	a	a	a	a	b	b	a	a	b	a	b	a	b	b	a	a	a	b	a	a	b	b	b	a	b	a	b	a	a	a	a	a	a	a	b	b	a	a	a	a	a	a	b	a
CABMR_07M19**	29.967	b	b	b	a	a	a	a	a	b	b	a	a	b	a	b	a	b	b	a	a	a	b	a	a	b	b	b	a	b	a	b	a	a	a	a	a	a	a	b	b	a	a	a	a	a	a	b	a
CAHMR_06H07**	31.704	b	b	b	a	a	a	a	a	b	b	a	a	b	a	b	a	b	b	a	a	a	b	a	a	b	b	b	a	a	a	b	a	a	a	a	a	a	a	b	b	a	a	a	a	a	a	b	a
CAHMR_03K05**	31.704	b	b	b	a	a	a	a	a	b	b	a	a	b	a	b	a	b	b	a	a	a	b	a	a	b	b	b	a	a	a	b	a	a	a	a	a	a	a	b	b	a	a	a	a	a	a	b	a
AHMR_09M15**	31.704	b	b	b	a	a	a	a	a	b	b	a	a	b	a	b	a	b	b	a	a	a	b	a	a	b	b	b	a	a	a	b	a	a	a	a	a	a	a	b	b	a	a	a	a	a	a	b	a
group 16B
CAHMR_07I02	0	b	b	b	a	b	a	a	a	b	b	b	a	a	a	b	a	a	b	b	b	a	b	a	b	b	b	b	a	a	a	a	a	a	a	b	a	b	a	b	b	a	a	b	b	b	a	b	a
ABMR_13J19	0	b	b	b	a	b	a	a	a	b	b	b	a	a	a	b	a	a	b	b	b	a	b	a	b	b	b	b	a	a	a	a	a	a	a	b	a	b	a	b	-	-	a	b	b	b	-	b	a
group A
CABMR_03I13**	0	b	b	a	a	a	a	b	a	a	a	a	a	a	b	a	b	a	b	a	b	b	b	a	a	a	b	a	a	a	a	a	a	a	a	a	b	a	a	a	a	b	a	b	a	a	a	a	b
AHMR_16P15**	0	b	b	a	a	a	a	b	a	a	a	a	a	a	b	a	b	a	b	a	b	b	b	a	a	a	b	a	a	a	a	a	a	a	a	a	b	a	-	a	a	b	a	b	a	a	a	a	b
CAHMR_05N09**	0	b	b	a	a	a	a	b	a	a	a	a	a	a	b	a	b	a	b	a	b	b	b	a	a	a	b	a	a	a	a	a	a	a	a	a	b	a	a	a	a	b	a	b	a	a	a	a	b
ABMR_15O18**	0	b	b	a	a	a	a	b	a	a	a	a	a	a	b	a	b	a	b	a	b	b	b	a	a	a	b	a	a	a	a	a	a	a	a	a	b	a	a	a	a	b	a	b	a	a	a	a	b
AHMR_07L07*	1.603	b	b	a	a	a	a	b	a	a	a	a	a	a	b	a	b	a	b	a	b	b	b	a	a	a	b	a	a	a	a	a	a	a	a	a	b	a	-	a	a	b	a	b	a	a	a	a	b
BEGGMpAT_367**	3.021	b	b	a	a	a	a	b	a	a	a	a	a	a	b	a	b	a	a	a	b	b	b	a	a	a	b	a	a	a	a	a	a	a	a	a	a	a	a	a	a	b	a	b	a	a	a	a	b
BEGTMpAT_162**	3.021	b	b	a	a	a	a	b	a	a	a	a	a	a	b	a	b	a	a	a	b	b	b	a	a	a	b	a	a	a	a	a	a	a	a	a	a	a	a	a	a	b	a	b	a	a	a	a	b
CAHMR_08C07*	5.696	a	b	a	a	a	a	b	a	-	a	a	a	a	b	a	b	a	b	a	b	b	b	a	a	a	b	a	a	a	a	a	a	a	a	a	b	a	a	a	a	-	a	b	b	a	a	a	b
CBHMR_10J13**	6.829	a	b	a	a	a	a	b	a	a	a	a	a	a	b	a	b	a	a	a	b	b	b	a	a	a	b	a	a	a	a	a	a	a	a	a	a	a	a	a	a	b	a	b	b	a	a	a	b
CBHMR_10I02**	6.829	a	b	a	a	a	a	b	a	a	a	a	a	a	b	a	b	a	a	a	b	b	b	a	a	a	b	a	a	a	a	a	a	a	a	a	a	a	a	a	a	b	a	b	b	a	-	a	b
BHMR_14M01**	6.829	a	b	a	a	a	a	b	a	a	a	a	a	a	b	a	b	a	a	a	b	b	b	a	a	a	b	a	a	a	a	a	a	a	a	a	a	a	a	a	a	b	a	b	b	a	a	a	b
CBHMR_14H18**	6.829	a	b	a	a	a	a	b	a	a	a	a	a	a	b	a	b	a	a	a	b	b	b	a	a	a	b	a	a	a	a	a	a	a	a	a	a	a	a	a	a	b	a	b	b	a	a	a	b
ABMR_03P23*	9.875	a	b	a	a	a	a	b	a	a	a	a	a	a	b	a	b	a	b	a	b	b	b	a	a	a	b	a	a	a	a	a	a	a	a	a	b	a	a	a	b	b	a	a	b	a	a	a	b
CABMR_06P08*	9.875	a	b	a	a	a	a	b	a	a	a	a	a	a	b	a	b	a	b	a	b	b	b	a	a	a	b	a	a	a	a	a	a	a	a	a	b	a	a	a	b	b	a	a	b	a	a	a	b
BEATMpCG_86**	12.224	a	b	a	b	a	a	b	a	a	a	a	a	a	b	a	b	a	a	a	b	b	b	a	a	a	b	a	a	a	a	a	a	a	a	a	a	a	a	a	b	b	a	a	b	a	a	a	b
BBMR_16E06**	13.716	a	b	a	b	a	a	b	a	a	a	a	a	a	b	a	b	a	a	a	b	b	b	a	a	a	b	a	a	a	a	a	a	a	a	a	a	a	a	a	b	b	a	a	b	a	a	a	b
CABMR_01E03*	14.927	a	b	a	b	a	a	b	a	a	a	a	a	a	b	a	b	a	b	a	b	b	b	a	a	a	b	a	a	a	a	a	a	a	a	a	b	a	a	a	b	b	a	a	b	a	a	a	b
CABMR_01O20*	14.927	a	b	a	b	a	a	b	a	a	a	a	a	a	b	a	b	a	b	a	b	b	b	a	a	a	b	a	a	a	a	a	a	a	a	a	b	a	a	a	b	b	a	a	b	a	a	a	b
CABMR_03J20*	14.927	a	b	a	b	a	a	b	a	a	a	a	a	a	b	a	b	a	b	a	b	b	b	a	a	a	b	a	a	a	a	a	a	a	a	a	b	a	a	a	b	b	a	a	b	a	a	a	b
ABMR_07K06*	14.927	a	b	a	b	a	a	b	a	a	a	a	a	a	b	a	b	a	b	a	b	b	b	a	a	a	b	a	a	a	a	a	a	a	a	a	b	a	a	a	b	b	a	a	b	a	a	a	b
ABMR_16K14*	14.927	a	b	a	b	a	a	b	a	a	a	a	a	a	b	a	b	a	b	a	b	b	b	a	a	a	b	a	a	a	a	a	a	a	a	a	b	a	a	a	b	b	a	a	b	a	a	a	b
CAHMR_08L11*	14.927	a	b	a	b	a	a	b	a	a	a	a	a	a	b	a	b	a	b	a	b	b	b	a	a	a	b	a	a	a	a	a	a	a	a	a	b	a	a	a	b	b	a	a	b	a	a	a	b
AHMR_09J16*	14.927	a	b	a	b	a	a	b	a	a	a	a	a	a	b	a	b	a	b	a	b	b	b	a	a	a	b	a	a	a	a	a	a	a	a	a	b	a	a	a	b	b	a	a	b	a	a	a	b
CAHMR_03F10	14.927	a	b	a	b	a	a	b	a	-	a	a	a	a	b	a	b	a	b	a	b	b	b	a	a	a	b	a	a	a	a	a	a	a	a	a	b	a	a	a	b	b	a	a	b	a	a	a	b
CAHMR_04I12**	14.927	a	b	a	b	a	a	-	a	a	a	a	a	a	b	a	b	a	b	a	b	b	b	a	a	a	-	a	a	a	a	a	a	a	a	a	b	a	a	a	-	b	a	a	b	a	a	a	b
AEGGMpCG_271	19.952	-	b	a	b	a	a	b	a	a	a	b	b	a	b	a	b	a	b	a	b	b	b	a	a	a	b	a	a	a	a	a	a	a	a	a	b	a	a	a	b	b	a	a	b	a	a	b	b
group C
CABMR_01C24	0	a	a	b	a	a	a	a	b	a	b	a	b	b	b	b	b	b	a	a	a	a	a	a	a	a	b	a	a	a	a	a	b	b	a	a	b	a	b	a	a	b	a	a	b	a	b	b	a
CAHMR_02D04	0	a	a	b	a	a	a	-	b	a	b	-	b	b	b	b	b	b	a	a	a	a	a	-	-	a	b	-	a	a	a	a	b	b	-	a	b	a	b	a	a	b	a	a	b	a	b	b	a
ABMR_10D16	0	a	a	b	a	a	a	a	b	a	b	a	b	-	b	-	b	b	a	a	a	a	a	a	a	a	b	a	a	a	a	a	b	b	a	-	-	a	b	a	a	b	a	-	b	a	b	b	a
CHMR_13O19**	0	a	a	b	a	a	a	a	b	a	b	a	b	b	-	b	b	-	a	a	a	a	a	a	a	a	b	a	a	a	a	a	b	-	a	a	b	a	b	a	a	-	a	a	b	a	b	-	a
CBMR_13A17	0	a	a	b	a	a	a	a	b	a	b	a	b	b	b	b	b	b	a	a	a	a	a	-	a	a	b	a	a	a	a	a	b	b	a	a	b	a	b	a	a	-	a	a	-	a	b	b	a
ABMR_03I10	0	a	a	b	a	a	a	a	b	a	b	a	b	b	b	b	b	b	a	a	a	a	a	a	a	a	b	a	a	a	a	a	b	b	a	a	b	a	b	-	a	b	a	a	b	a	-	-	a
AHMR_16H20*	0	a	a	b	a	a	a	a	b	a	b	a	b	b	b	b	b	b	a	a	a	a	a	a	a	a	b	a	a	a	a	a	-	-	a	a	b	a	b	a	a	b	a	a	b	a	b	b	a
AHMR_11P01*	0	a	a	b	a	a	a	a	b	a	b	a	b	b	b	b	b	b	a	a	a	a	a	a	a	a	-	a	a	a	a	a	-	-	a	a	b	a	b	a	a	b	a	a	b	a	b	b	a
ABMR_14M13	0	a	a	b	a	a	-	a	b	a	b	a	b	b	b	b	b	b	a	a	a	a	a	a	a	a	b	a	a	a	a	-	b	b	a	a	b	a	b	a	a	b	a	a	b	a	b	b	a
AHMR_16N06	0	a	a	b	a	a	a	a	b	a	b	a	b	b	b	b	b	b	a	a	a	a	a	a	a	a	b	a	a	a	a	a	b	b	a	a	b	a	b	a	a	b	a	a	b	a	b	b	a
AHMR_06F17	0	a	a	b	a	a	a	a	b	a	b	a	b	b	-	b	b	b	a	a	a	a	a	a	a	a	b	a	a	a	a	a	b	b	a	a	b	a	b	a	a	b	a	a	b	a	b	b	a
AHMR_04B08	0	a	a	b	a	a	a	-	b	a	b	a	b	b	b	b	b	b	a	a	a	a	a	a	a	a	b	a	a	a	a	a	b	b	a	a	b	a	b	a	a	b	a	a	b	a	b	b	a
AHMR_03E24	0	a	a	b	a	a	a	a	b	a	b	a	b	b	b	b	b	b	a	a	a	a	a	-	a	a	b	a	a	a	a	a	b	b	a	a	b	a	b	a	a	b	a	a	b	a	b	b	a
AHMR_01G04	0	a	a	b	a	a	a	a	b	a	b	-	b	b	b	b	b	b	a	a	a	a	a	a	a	a	b	a	a	a	a	a	b	b	a	a	b	a	b	a	a	b	a	a	b	a	b	b	a
ABMR_15C20	0	a	a	b	a	a	a	a	b	a	b	a	b	b	b	b	b	b	a	a	a	a	a	a	a	a	b	a	a	a	a	a	b	b	a	a	b	a	b	a	a	b	a	a	b	a	b	b	a
ABMR_13A18	0	a	a	b	a	a	a	a	b	a	b	a	b	b	b	b	b	b	a	a	a	a	a	a	a	a	-	a	a	a	a	a	b	b	a	a	b	a	b	a	a	b	a	a	b	a	b	b	a
ABMR_09J21	0	a	a	b	a	a	a	a	b	a	b	a	b	b	b	b	b	b	a	a	a	a	a	a	a	a	b	a	a	a	a	a	b	b	a	a	b	a	b	a	a	b	a	a	b	a	b	b	a
CABMR_07P09	0	a	a	b	a	a	a	a	b	a	b	a	b	b	b	b	b	b	a	a	a	a	a	a	a	a	b	a	a	a	a	a	b	b	a	a	b	a	b	a	a	b	a	a	-	a	b	b	a
AHMR_16N07	0	a	a	b	a	a	a	a	b	a	b	a	b	b	b	b	b	b	a	a	a	a	a	a	a	a	b	a	a	a	a	a	b	b	a	a	b	a	b	a	a	b	a	a	b	a	b	b	a
AHMR_16B05	0	a	a	b	a	a	a	a	b	a	b	a	b	b	b	b	b	b	a	a	a	a	a	a	a	a	b	a	a	a	a	a	b	b	a	a	b	a	b	a	a	b	a	a	b	a	b	b	a
CHMR_12F23	0	a	a	b	a	a	a	a	b	a	b	a	b	b	b	b	b	b	a	a	a	a	a	a	a	a	b	a	a	a	a	a	b	b	a	a	b	a	b	a	a	b	a	a	b	a	b	b	a
CAHMR_07N06	0	a	a	b	a	a	a	a	b	a	b	a	b	b	b	b	b	b	a	a	a	a	a	a	a	a	b	a	a	a	a	a	b	b	a	a	b	a	b	a	a	b	a	a	b	a	b	b	a
ABMR_13M05	0	a	a	b	a	a	a	a	b	a	b	a	b	b	b	b	b	b	a	a	a	a	a	a	a	a	b	a	a	a	a	a	b	b	a	a	b	a	b	a	a	b	a	a	b	a	b	b	a
ABMR_12D04	0	a	a	b	a	a	a	a	b	a	b	a	b	b	b	b	b	b	a	a	a	a	a	a	a	a	b	a	a	a	a	a	b	b	a	a	b	a	b	a	a	b	a	a	b	a	b	b	a
ABMR_08G07	0	a	a	b	a	a	a	a	b	a	b	a	b	b	b	b	b	b	a	a	a	a	a	a	a	a	b	a	a	a	a	a	b	b	a	a	b	a	b	a	a	b	a	a	b	a	b	b	a
CABMR_06B15	0	a	a	b	a	a	a	a	b	a	b	a	b	b	b	b	b	b	a	a	a	a	a	a	a	a	b	a	a	a	a	a	b	b	a	a	b	a	b	a	a	b	a	a	b	a	b	b	a
CABMR_04P19	0	a	a	b	a	a	a	a	b	a	b	a	b	b	b	b	b	b	a	a	a	a	a	a	a	a	b	a	a	a	a	a	b	b	a	a	b	a	b	a	a	b	a	a	b	a	b	b	a
ABMR_03L06	0	a	a	b	a	a	a	a	b	a	b	a	b	b	b	b	b	b	a	a	a	a	a	a	a	a	b	a	a	a	a	a	b	b	a	a	b	a	b	a	a	b	a	a	b	a	b	b	a
ABMR_03F19	0	a	a	b	a	a	a	a	b	a	b	a	b	b	b	b	b	b	a	a	a	a	a	a	a	a	b	a	a	a	a	a	b	b	a	a	b	a	b	a	a	b	a	a	b	a	b	b	a
ABMR_02K06	0	a	a	b	a	a	a	a	b	a	b	a	b	b	b	b	b	b	a	a	a	a	a	a	a	a	b	a	a	a	a	a	b	b	a	a	b	a	b	a	a	b	a	a	b	a	b	b	a
CABMR_02F10	0	a	a	b	a	a	a	a	b	a	b	a	b	b	b	b	b	b	a	a	a	a	a	a	a	a	b	a	a	a	a	a	b	b	a	a	b	a	b	a	a	b	a	a	b	a	b	b	a
CABMR_02D21	0	a	a	b	a	a	a	a	b	a	b	a	b	b	b	b	b	b	a	a	a	a	a	a	a	a	b	a	a	a	a	a	b	b	a	a	b	a	b	a	a	b	a	a	b	a	b	b	a
ABMR_02B09	0	a	a	b	a	a	a	a	b	a	b	a	b	b	b	b	b	b	a	a	a	a	a	a	a	a	b	a	a	a	a	a	b	b	a	a	b	a	b	a	a	b	a	a	b	a	b	b	a
CABMR_01M07	0	a	a	b	a	a	a	a	b	a	b	a	b	b	b	b	b	b	a	a	a	a	a	a	a	a	b	a	a	a	a	a	b	b	a	a	b	a	b	a	a	b	a	a	b	a	b	b	a
ABMR_01L24	0	a	a	b	a	a	a	a	b	a	b	a	b	b	b	b	b	b	a	a	a	a	a	a	a	a	b	a	a	a	a	a	b	b	a	a	b	a	b	a	a	b	a	a	b	a	b	b	a
AEGAMpAG_146	1.667	a	a	b	a	a	a	a	b	a	b	a	b	b	b	b	b	a	a	a	a	a	a	a	a	a	b	a	a	a	a	a	b	b	a	a	b	a	b	a	a	b	a	a	b	a	b	b	a
group 21
ABMR_01A09	0	b	a	b	b	b	a	a	b	a	a	b	a	b	b	a	b	b	a	a	a	a	a	a	a	b	b	a	a	a	a	a	a	b	a	b	a	a	a	b	a	b	a	a	a	b	b	b	a
AHMR_09F03	0	b	a	b	b	b	-	a	b	a	a	b	a	b	b	a	b	b	a	a	a	a	a	a	a	b	b	a	a	a	a	-	a	b	a	b	-	a	a	b	a	b	a	a	a	b	b	b	a
CAHMR_03I02	0	b	a	b	b	b	-	a	b	a	a	b	a	b	b	a	b	b	a	a	a	a	a	a	a	b	b	a	a	-	a	a	-	b	a	b	a	a	a	b	a	b	a	a	a	b	b	b	a
AHMR_09B12	0	b	a	b	b	b	-	a	b	a	a	b	a	b	b	a	b	b	a	a	a	a	a	a	a	b	b	a	a	a	a	a	a	b	a	b	a	a	a	b	a	b	a	-	a	b	b	b	a
AHMR_02F22	0	b	a	b	b	b	-	a	b	a	a	b	a	b	-	a	b	b	a	a	a	a	a	a	a	b	b	a	a	a	a	a	a	b	a	b	a	a	-	b	a	b	a	a	a	b	b	b	a
ABMR_05O20	0	b	a	b	b	b	-	a	b	a	a	b	a	b	b	a	b	b	a	a	a	a	a	a	a	b	b	a	a	a	a	a	a	b	a	b	a	a	a	b	a	b	a	a	a	b	b	-	a
CAHMR_05C20	0	b	a	b	b	b	-	a	b	a	a	b	a	b	b	a	b	b	a	a	a	a	a	a	-	b	b	a	a	a	a	a	a	b	a	b	a	a	a	b	a	b	a	a	a	b	b	b	a
ABMR_09M18	0	b	a	b	b	b	-	a	b	a	a	b	a	b	-	a	b	b	a	a	a	a	a	a	a	b	b	a	a	a	a	a	a	b	a	b	a	a	a	b	a	b	a	a	a	b	b	b	a
ABMR_08O14	0	b	a	b	b	b	-	a	b	a	a	b	a	b	b	a	b	b	a	a	a	a	a	a	a	b	b	a	a	a	a	a	a	b	a	b	a	a	a	b	a	b	a	a	a	b	b	-	a
AHMR_13I15	0	b	a	b	b	b	-	a	b	a	a	b	a	b	b	a	b	b	a	a	a	a	a	a	a	b	b	a	a	a	a	a	a	b	a	b	a	a	a	b	a	b	a	a	a	b	b	b	a
CHMR_13D06	0	b	a	b	b	b	-	a	b	a	a	b	a	b	b	a	b	b	a	a	a	a	a	a	a	b	b	a	a	a	a	a	a	b	a	b	a	a	a	b	a	b	a	a	a	b	b	b	a
CHMR_12J15	0	b	a	b	b	b	-	a	b	a	a	b	a	b	b	a	b	b	a	a	a	a	a	a	a	b	b	a	a	a	a	a	a	b	a	b	a	a	a	b	a	b	a	a	a	b	b	b	a
CAHMR_08O18	0	b	a	b	b	b	-	a	b	a	a	b	a	b	b	a	b	b	a	a	a	a	a	a	a	b	b	a	a	a	a	a	a	b	a	b	a	a	a	b	a	b	a	a	a	b	b	b	a
AHMR_07C18	0	b	a	b	b	b	-	a	b	a	a	b	a	b	b	a	b	b	a	a	a	a	a	a	a	b	b	a	a	a	a	a	a	b	a	b	a	a	a	b	a	b	a	a	a	b	b	b	a
AHMR_05L13	0	b	a	b	b	b	-	a	b	a	a	b	a	b	b	a	b	b	a	a	a	a	a	a	a	b	b	a	a	a	a	a	a	b	a	b	a	a	a	b	a	b	a	a	a	b	b	b	a
CAHMR_05K11	0	b	a	b	b	b	-	a	b	a	a	b	a	b	b	a	b	b	a	a	a	a	a	a	a	b	b	a	a	a	a	a	a	b	a	b	a	a	a	b	a	b	a	a	a	b	b	b	a
CAHMR_02P01	0	b	a	b	b	b	-	a	b	a	a	b	a	b	b	a	b	b	a	a	a	a	a	a	a	b	b	a	a	a	a	a	a	b	a	b	a	a	a	b	a	b	a	a	a	b	b	b	a
AEGAMpCA_150	0	b	a	b	b	b	a	a	b	a	a	b	a	b	b	a	b	b	a	a	a	a	a	a	a	b	b	a	a	a	a	a	a	b	a	b	a	a	a	b	a	b	a	a	a	b	b	-	a
ABMR_16I14	0	b	a	b	b	b	-	a	b	a	a	b	a	b	b	a	b	b	a	a	a	a	a	a	a	b	b	a	a	a	a	a	a	b	a	b	a	a	a	b	a	b	a	a	a	b	b	b	a
ABMR_05O21	0	b	a	b	b	b	-	a	b	a	a	b	a	b	b	a	b	b	a	a	a	a	a	a	a	b	b	a	a	a	a	a	a	b	a	b	a	a	a	b	a	b	a	a	a	b	b	b	a
ABMR_02K18	0	b	a	b	b	b	-	a	b	a	a	b	a	b	b	a	b	b	a	a	a	a	a	a	a	b	b	a	a	a	a	a	a	b	a	b	a	a	a	b	a	b	a	a	a	b	b	b	a
ABMR_02F20	0	b	a	b	b	b	-	a	b	a	a	b	a	b	b	a	b	b	a	a	a	a	a	a	a	b	b	a	a	a	a	a	a	b	a	b	a	a	a	b	a	b	a	a	a	b	b	b	a
AEGAMpCG_109	0	b	a	b	b	b	a	a	b	a	a	b	a	b	b	a	b	b	a	a	a	a	a	a	a	b	b	a	a	a	a	a	a	b	a	b	a	a	a	b	a	b	a	a	a	b	b	b	a
AEGAMpCC_212	0	b	a	b	b	b	a	a	b	a	a	b	a	b	b	a	b	b	a	a	a	a	a	a	a	b	b	a	a	a	a	a	a	b	a	b	a	a	a	b	a	b	a	a	a	b	b	b	a
ABMR_16D22	0	b	a	b	b	b	a	a	b	a	a	b	a	b	b	a	b	b	a	a	a	a	a	a	a	b	b	a	a	a	a	a	a	b	a	b	a	a	a	b	a	b	a	a	a	b	b	b	a
ABMR_08A24	0	b	a	b	b	b	a	a	b	a	a	b	a	b	b	a	b	b	a	a	a	a	a	a	a	b	b	a	a	a	a	a	a	b	a	b	a	a	a	b	a	b	a	a	a	b	b	b	a
CABMR_07P03	0	b	a	b	b	b	a	a	b	a	a	b	a	b	b	a	b	b	a	a	a	a	a	a	a	b	b	a	a	a	a	a	a	b	a	b	a	a	a	b	a	b	a	a	a	b	b	b	a
CABMR_01E02	0	b	a	b	b	b	a	a	b	a	a	b	a	b	b	a	b	b	a	a	a	a	a	a	a	b	b	a	a	a	a	a	a	b	a	b	a	a	a	b	a	b	a	a	a	b	b	b	a
ABMR_03O18	1.667	b	a	b	b	b	b	a	b	a	a	b	a	b	b	a	b	b	a	a	a	a	a	a	a	b	b	a	a	a	a	a	a	b	a	b	a	a	a	b	a	b	a	a	a	b	b	b	a
ggc-0003A	1.667	b	a	b	b	b	b	a	b	-	a	b	-	b	b	a	b	b	a	a	a	a	a	a	a	b	b	a	a	a	a	a	a	b	a	b	a	a	a	b	a	b	-	a	a	b	b	b	a
gaa-0004	1.667	b	a	b	b	b	b	a	b	-	a	b	-	b	b	a	b	b	a	a	a	a	a	a	a	b	b	a	a	a	a	a	a	b	a	b	a	a	a	b	a	b	-	a	a	b	b	b	a
AHMR_15K01	1.667	-	a	b	b	b	b	a	b	a	a	b	a	b	b	a	-	-	a	a	a	a	a	a	a	b	b	a	a	a	a	a	a	b	a	-	a	a	a	b	a	b	a	a	a	b	b	b	a
CHMR_10D17	1.667	b	a	b	b	b	b	a	b	a	a	b	a	b	b	a	b	b	a	a	a	a	a	a	a	b	b	a	a	a	a	a	-	-	a	b	a	a	a	-	a	b	a	a	a	-	b	b	a
ABMR_09J23	1.667	b	a	b	b	b	b	a	b	a	a	b	a	b	b	a	b	-	a	a	a	a	a	a	a	b	b	a	a	a	a	a	a	b	a	-	a	a	a	b	a	b	a	a	a	b	-	-	a
CHMR_13O04	1.667	b	a	b	b	b	b	a	b	a	a	b	a	b	b	a	b	b	a	a	a	a	a	a	a	b	b	a	a	a	a	a	a	-	a	b	a	a	a	b	a	b	a	a	a	b	b	b	a
CHMR_09B06	1.667	b	a	b	b	b	b	a	b	a	a	-	a	b	b	a	b	b	a	a	a	a	a	a	a	b	b	a	a	a	a	a	a	b	a	b	a	a	a	-	a	b	a	a	a	b	b	b	a
AHMR_15A20	1.667	b	a	b	b	b	b	a	b	-	a	b	a	b	b	a	b	b	a	a	a	a	a	a	a	b	b	a	a	a	a	a	a	b	a	b	a	a	a	b	a	b	a	a	a	b	b	b	a
CAHMR_06B02	1.667	b	a	b	b	b	b	a	b	a	a	b	a	b	-	a	b	b	a	a	a	a	a	a	a	b	b	a	a	a	a	a	a	b	a	b	a	a	a	b	a	b	a	a	a	b	b	b	a
ABMR_15I21	1.667	b	a	b	b	b	b	a	b	a	a	b	a	b	b	a	b	b	a	a	a	a	a	a	a	b	b	a	a	a	a	a	a	b	a	b	a	a	a	b	a	b	a	-	a	b	b	b	a
ABMR_04N24	1.667	b	a	b	b	b	b	a	b	a	a	b	a	b	b	a	b	b	a	a	a	a	a	a	a	b	b	a	a	a	a	a	a	b	-	b	a	a	a	b	a	b	a	a	a	b	b	b	a
AHMR_16M15	1.667	b	a	b	b	b	b	a	b	a	a	b	a	b	b	a	b	b	a	a	a	a	a	a	a	b	b	a	a	a	a	a	a	b	a	b	a	a	a	b	a	b	a	a	a	b	b	b	a
AHMR_15G24	1.667	b	a	b	b	b	b	a	b	a	a	b	a	b	b	a	b	b	a	a	a	a	a	a	a	b	b	a	a	a	a	a	a	b	a	b	a	a	a	b	a	b	a	a	a	b	b	b	a
AHMR_14K08	1.667	b	a	b	b	b	b	a	b	a	a	b	a	b	b	a	b	b	a	a	a	a	a	a	a	b	b	a	a	a	a	a	a	b	a	b	a	a	a	b	a	b	a	a	a	b	b	b	a
AHMR_12H07	1.667	b	a	b	b	b	b	a	b	a	a	b	a	b	b	a	b	b	a	a	a	a	a	a	a	b	b	a	a	a	a	a	a	b	a	b	a	a	a	b	a	b	a	a	a	b	b	b	a
AHMR_10D02	1.667	b	a	b	b	b	b	a	b	a	a	b	a	b	b	a	b	b	a	a	a	a	a	a	a	b	b	a	a	a	a	a	a	b	a	b	a	a	a	b	a	b	a	a	a	b	b	b	a
CHMR_09D04	1.667	b	a	b	b	b	b	a	b	a	a	b	a	b	b	a	b	b	a	a	a	a	a	a	a	b	b	a	a	a	a	a	a	b	a	b	a	a	a	b	a	b	a	a	a	b	b	b	a
CAHMR_05E06	1.667	b	a	b	b	b	b	a	b	a	a	b	a	b	b	a	b	b	a	a	a	a	a	a	a	b	b	a	a	a	a	a	a	b	a	b	a	a	a	b	a	b	a	a	a	b	b	b	a
CABMR_07N05	1.667	b	a	b	b	b	b	a	b	a	a	b	a	b	b	a	b	b	a	a	a	a	a	a	a	b	b	a	a	a	a	a	a	b	a	b	a	a	a	b	a	b	a	a	a	b	b	b	a
CABMR_04K19	1.667	b	a	b	b	b	b	a	b	a	a	b	a	b	b	a	b	b	a	a	a	a	a	a	a	b	b	a	a	a	a	a	a	b	a	b	a	a	a	b	a	b	a	a	a	b	b	b	a
group B
CABMR_04N23	0	a	a	a	a	a	a	a	b	a	b	a	a	b	a	b	a	b	b	b	b	b	b	b	a	b	b	b	b	b	b	a	a	a	b	a	b	b	a	b	a	b	b	a	b	a	b	b	a
ABMR_05A24	0	a	a	a	a	a	a	a	b	a	b	a	a	b	a	b	a	b	b	b	b	b	b	b	a	b	b	b	b	b	b	a	a	a	b	a	b	b	a	b	a	b	b	a	b	a	b	b	a
ABMR_05N21	0	a	a	a	a	a	a	a	b	a	b	a	a	b	a	b	a	b	b	b	b	b	b	b	a	b	b	b	b	b	b	a	a	a	b	a	b	b	a	b	a	b	b	a	b	a	b	b	a
ABMR_08N21	0	a	a	a	a	a	a	a	b	a	b	a	a	-	a	b	a	b	b	b	b	b	b	b	a	b	b	b	b	b	b	a	a	a	b	a	b	b	a	b	a	b	b	a	b	a	b	b	a
CABMR_01C12	0	a	a	a	a	a	a	a	b	a	b	a	a	b	a	b	a	b	b	b	b	b	b	b	a	b	b	b	b	b	b	a	a	a	b	a	b	b	-	b	-	b	b	a	b	a	b	b	a
CAHMR_02A19	23.2	a	a	b	a	a	a	b	b	a	b	a	b	b	a	a	a	b	b	b	b	b	b	b	b	b	b	b	b	b	b	b	a	a	b	b	a	b	a	b	a	b	b	a	b	b	b	b	b
CAHMR_07E02	23.2	a	a	b	a	a	a	b	b	a	b	a	b	b	a	a	a	b	b	b	b	b	b	b	b	b	b	b	b	b	b	b	a	a	b	b	a	b	a	b	a	b	b	a	b	b	b	b	b
group E
ABMR_02N22	0	b	a	a	a	a	b	b	a	a	b	a	b	b	a	a	a	b	b	a	b	a	b	a	a	a	a	a	a	b	b	b	a	b	a	b	a	b	b	b	a	b	a	b	a	a	a	a	a
ABMR_03F22	0	b	a	a	a	a	b	b	a	a	b	a	b	b	a	a	a	b	b	a	b	a	b	a	a	a	a	a	a	b	b	b	a	b	a	b	a	b	b	b	a	b	a	b	a	a	a	a	a
BHMR_13F01	5.024	b	a	a	a	a	b	b	a	a	b	a	b	b	a	a	a	b	b	a	b	a	b	a	a	a	a	a	b	b	b	b	a	b	b	b	a	b	b	b	b	b	a	b	a	a	a	a	a
AEGAMpAC_529	6.697	b	a	a	a	a	b	b	a	a	b	a	b	b	a	a	a	a	b	a	b	a	b	a	a	a	a	a	b	b	b	b	a	b	b	b	a	b	b	b	b	b	a	b	a	a	a	a	a
ABMR_06P22	6.697	b	a	a	a	a	b	b	a	a	b	a	b	b	a	a	a	-	b	a	b	a	b	a	a	a	a	a	b	b	b	b	a	b	b	b	a	b	b	-	b	b	a	b	a	a	a	a	a
group D
AHMR_08D24	0	a	a	b	a	a	a	a	b	b	a	b	a	a	a	b	-	-	-	a	a	a	b	b	a	b	b	b	a	a	b	b	a	a	b	a	a	a	a	a	b	a	a	b	b	b	b	a	b
CBHMR_15L18	1.755	a	a	b	a	a	a	a	b	b	a	b	a	a	a	b	b	b	b	a	a	a	b	b	a	b	b	b	a	a	b	b	a	a	b	a	a	a	a	a	b	a	a	b	b	a	b	a	b
[truncated: 12 more columns]

## Sheet: AFLP and DArT twin data
AFLP & DArT twin data
AFLP loci IPO323 x IPO94269	9	10		111	112		133	134		156	158		159	160		174	175		176	178		DArT loci	22	27		109	110		116	117		148	150
AEATMpAG,108	A	A		B	B		B	B		B	B		B	B		B	B		A	A		ABMR_06A11	A	A		B	B		A	A		A	A
AEATMpAG,124	B	B		B	B		B	B		B	B		A	A		A	A		B	B		CABMR_06A13	A	A		A	A		A	A		A	A
AEATMpAG,126	A	A		A	A		A	A		B	B		B	B		B	B		A	A		CABMR_06B15	A	A		A	A		A	A		B	B
AEATMpAG,140	A	A		A	A		A	A		B	B		A	A		A	A		B	B		ABMR_06C17	B	B		A	A		B	B		B	B
AEATMpAG,150	B	B		B	B		B	B		B	B		A	A		B	B		A	A		ABMR_06C21*	B	B		A	A		A	A		A	A
AEATMpAG,200	B	B		A	A		B	B		B	B		A	A		A	A		A	A		CABMR_06D24	A	A		B	B		A	A		A	A
AEATMpAG,217	A	A		B	B		A	A		B	B		B	B		A	A		B	B		ABMR_06E12	B	B		A	A		A	A		A	A
AEATMpAG,221	B	B		A	A		A	A		B	B		B	B		B	B		B	B		ABMR_06E20	B	B		B	B		A	A		B	B
AEATMpAG,322	B	B		A	A		B	B		A	A		A	A		A	A		A	A		ABMR_06F05	B	B		B	B		A	A		B	B
AEATMpAG,357	A	A		A	A		A	A		B	B		A	A		A	A		B	B		ABMR_06F17	A	A		B	B		A	A		A	A
AEATMpAG,526	A	A		B	B		A	A		A	A		B	B		B	B		A	A		CABMR_06F19	B	B		B	B		A	A		A	A
AEATMpAG,80	A	A		B	B		B	B		B	B		B	B		B	B		A	A		ABMR_06F24	B	B		B	B		A	A		B	B
AEATMpAG,90	A	A		B	B		A	A		A	A		B	B		A	A		B	B		ABMR_06H04*	B	B		B	B		B	B		A	A
AEATMpCG,109	B	B		B	B		B	B		A	A		A	A		A	A		B	B		CABMR_06I18	A	A		A	A		B	B		A	A
AEATMpCG,138	A	A		B	B		A	A		A	A		B	B		A	A		B	B		CABMR_06I23	A	A		B	B		A	A		A	A
AEATMpCG,143	A	A		B	B		A	A		B	B		B	B		A	A		A	A		ABMR_06J06	B	B		B	B		A	A		B	B
AEATMpCG,190	A	A		B	B		B	B		A	A		B	B		B	B		A	A		CABMR_06J10	A	A		B	B		A	A		A	A
AEATMpCG,194	A	A		A	A		A	A		B	B		A	A		B	B		B	B		CABMR_06K02	A	A		B	B		B	B		B	B
AEATMpCG,272	A	A		A	A		B	B		B	B		A	A		A	A		B	B		CABMR_06L08	A	A		B	B		A	A		A	A
AEATMpCG,305	A	A		A	A		A	A		B	B		A	A		B	B		B	B		CABMR_06L09**	A	A		B	B		A	A		A	A
AEATMpCG,325	A	A		B	B		A	A		A	A		B	B		A	A		B	B		ABMR_06L11	A	A		B	B		A	A		A	A
AEATMpCG,577	-	-		B	B		B	B		A	A		B	B		B	B		B	B		CABMR_06L14	B	B		B	B		A	A		B	B
AEATMpCG,591	-	-		B	B		A	A		B	B		A	A		A	A		B	B		CABMR_06M10	A	A		B	B		A	A		A	A
AEATMpCG,620	A	A		B	B		A	A		A	A		B	B		B	B		A	A		ABMR_06M13	B	B		B	B		A	A		A	A
AEATMpCG,71	B	B		A	A		A	A		B	B		A	A		A	A		B	B		CABMR_06N13**	A	A		B	B		A	A		A	A
AEGAMpAC,117	B	B		B	B		A	A		B	B		A	A		A	A		B	B		ABMR_06N21	B	B		B	B		B	B		A	A
AEGAMpAC,145	B	B		A	A		A	A		B	B		B	B		B	B		A	A		ABMR_06P04	A	A		B	B		B	B		A	A
AEGAMpAC,161	A	A		B	B		A	A		-	B		A	A		A	A		B	B		ABMR_06P05	B	B		A	A		A	A		B	B
AEGAMpAC,169	A	A		B	B		A	A		B	B		A	A		A	A		B	B		CABMR_06P08*	A	A		A	A		A	A		A	A
AEGAMpAC,201	A	A		B	B		A	A		B	B		B	B		A	A		A	A		CABMR_06P15	A	A		A	A		B	B		B	B
AEGAMpAC,202	A	A		B	B		A	A		B	B		B	B		A	A		A	A		ABMR_06P22	A	A		A	A		B	B		A	A
AEGAMpAC,210	A	A		B	B		A	A		B	B		A	A		A	A		B	B		CABMR_02A02	B	B		B	B		A	A		B	B
AEGAMpAC,212	B	B		B	B		A	A		A	A		B	B		B	B		B	B		ABMR_02B03*	B	B		A	A		A	A		A	-
AEGAMpAC,251	A	A		B	B		A	A		B	B		A	A		A	A		B	B		ABMR_02B09	A	A		A	A		A	A		B	B
AEGAMpAC,277	A	A		B	B		B	B		A	A		B	B		A	A		B	B		ABMR_02B16	B	B		B	B		B	B		B	B
AEGAMpAC,289	A	A		B	B		B	B		A	A		B	B		A	A		B	B		ABMR_02C07	A	A		A	A		B	B		B	B
AEGAMpAC,349	A	A		B	B		B	B		B	B		A	A		B	B		A	A		ABMR_02C22*	A	A		-	B		A	A		A	A
AEGAMpAC,358	B	B		A	A		A	A		B	B		A	A		B	B		B	B		ABMR_02D06	B	B		B	B		A	A		B	B
AEGAMpAC,529	A	A		B	B		B	B		A	A		B	B		B	B		A	A		ABMR_02D07	A	A		B	B		A	A		A	A
AEGAMpAC,549	B	B		B	B		B	B		A	A		B	B		B	B		B	B		ABMR_02D09	A	A		B	B		A	A		A	A
AEGAMpAC,584	A	A		B	B		A	A		B	B		B	B		A	A		A	A		CABMR_02D17	B	B		B	B		A	A		A	A
AEGAMpAC,83	B	B		A	A		B	B		A	A		B	B		A	A		B	B		ABMR_02D20	A	A		A	A		B	B		A	A
AEGAMpAG,122	A	A		B	B		A	A		B	B		A	A		A	A		B	B		CABMR_02D21	A	A		A	A		A	A		B	B
AEGAMpAG,134	B	B		A	A		A	A		B	B		A	A		A	A		B	B		CABMR_02F10	A	A		A	A		A	A		B	B
AEGAMpAG,142	B	B		A	A		A	A		B	B		A	A		B	B		B	B		CABMR_02F15	A	A		B	B		B	B		B	B
AEGAMpAG,168	B	B		B	B		A	A		B	B		A	A		A	A		B	B		ABMR_02F20	B	B		B	B		A	A		A	A
AEGAMpAG,192	B	B		A	A		A	A		B	B		A	A		B	B		A	A		ABMR_02F23	A	A		B	B		B	B		A	A
AEGAMpAG,209	B	B		B	B		B	B		A	A		A	A		B	B		B	B		ABMR_02J04	A	A		B	B		B	B		B	B
AEGAMpAG,268	A	A		B	B		A	A		A	A		B	B		B	B		A	A		CABMR_02J08	B	B		B	B		A	A		B	B
AEGAMpAG,293	B	B		B	B		A	A		A	A		B	B		B	B		A	A		ABMR_02J20	A	A		A	A		B	B		B	B
AEGAMpAG,308	A	A		A	A		A	A		B	B		A	A		A	A		B	B		ABMR_02K06	A	A		A	A		A	A		B	B
AEGAMpAG,333	B	B		A	A		B	B		B	B		B	B		B	B		B	B		ABMR_02K18	B	B		B	B		A	A		A	A
AEGAMpAG,358	A	A		B	B		B	B		B	B		B	B		A	A		A	A		ABMR_02N09	B	B		B	B		B	B		A	A
AEGAMpAG,394	B	B		B	B		B	B		B	B		B	B		A	A		B	-		ABMR_02N22	A	A		A	A		A	A		A	A
AEGAMpAG,460	B	B		B	B		A	A		B	B		B	B		B	B		A	A		ABMR_02O17	A	A		A	A		A	A		A	A
AEGAMpAG,519	A	A		B	B		B	B		B	B		B	B		A	A		A	A		ABMR_02O22	A	A		B	B		A	A		A	A
AEGAMpAG,523	A	A		B	B		B	B		A	A		B	B		B	B		A	A		CABMR_02P02	B	B		A	A		A	A		A	A
AEGAMpAG,543	A	A		B	B		A	A		B	B		A	A		A	A		B	B		ABMR_02P15	A	A		B	B		A	A		A	A
AEGAMpAG,688	A	A		A	A		A	A		B	B		B	B		A	A		B	B		ABMR_03A05	B	B		B	B		A	A		A	A
AEGAMpAG,90	A	A		A	A		A	A		B	B		A	A		B	B		A	A		CABMR_03A14*	A	A		B	B		A	A		A	A
AEGAMpCA,107	A	A		B	B		-	A		B	B		A	A		A	A		B	B		ABMR_03A20	-	B		A	A		A	A		B	B
AEGAMpCA,139	A	A		B	B		A	A		A	A		B	B		A	A		B	B		CABMR_03B13	A	A		B	B		A	A		A	A
AEGAMpCA,145	A	A		B	B		B	B		A	A		B	B		B	B		A	A		CABMR_03C01	B	B		B	B		A	A		B	B
AEGAMpCA,186	B	B		A	A		B	B		B	B		B	B		B	B		A	A		CABMR_03C15	B	B		B	B		A	A		B	B
AEGAMpCA,202	A	A		A	A		A	A		B	B		A	A		B	B		B	B		CABMR_03C23	B	B		B	B		A	A		B	B
AEGAMpCA,255	B	B		B	B		A	A		B	B		A	A		A	A		B	B		ABMR_03D01	B	B		B	B		A	A		A	A
AEGAMpCA,281	A	A		B	B		A	A		B	B		A	A		A	A		B	B		ABMR_03D07	B	B		B	B		B	B		A	A
AEGAMpCA,292	B	B		A	A		B	B		B	B		A	A		A	A		A	A		ABMR_03D09	A	A		B	B		B	B		A	A
AEGAMpCA,303	-	A		B	B		A	A		B	B		B	B		A	A		B	B		ABMR_03D12	B	B		B	B		A	A		B	B
AEGAMpCA,364	A	A		B	B		A	A		B	B		B	B		B	B		A	A		ABMR_03D15	A	A		B	B		A	A		A	A
AEGAMpCA,606	A	A		B	B		B	B		B	B		B	B		B	B		A	A		ABMR_03D20	A	A		A	A		B	B		B	B
AEGAMpCA,77	A	A		A	A		B	B		A	A		A	A		A	A		A	-		ABMR_03E15	B	B		B	B		A	A		A	A
AEGAMpCC,110	B	B		B	B		A	A		B	B		A	A		A	A		B	B		CABMR_03E17	A	A		B	B		A	A		B	B
AEGAMpCC,118	A	A		B	B		A	A		B	B		A	A		A	A		B	B		ABMR_03E19	A	A		A	A		A	A		A	A
AEGAMpCC,120	B	B		B	B		A	A		A	A		B	B		B	B		A	A		ABMR_03F04	B	B		B	B		A	A		A	A
AEGAMpCC,145	B	B		A	A		B	B		B	B		B	B		B	B		A	A		CABMR_03F07	A	A		B	B		A	A		A	A
AEGAMpCC,173	A	A		B	B		A	A		B	B		A	A		A	A		B	B		ABMR_03F13*	B	B		A	A		A	A		A	A
AEGAMpCC,227	B	B		A	A		A	A		B	B		A	A		B	B		A	A		ABMR_03F19	A	A		A	A		A	A		B	B
AEGAMpCC,253	B	B		A	A		B	B		B	B		A	A		B	B		A	A		ABMR_03F22	A	A		A	A		A	A		A	A
AEGAMpCC,313	A	A		B	B		B	B		B	B		A	A		B	B		A	A		ABMR_03G21	B	B		B	B		A	A		B	B
AEGAMpCC,333	B	B		B	B		A	A		A	A		B	B		B	B		B	B		ABMR_03H04	A	A		A	A		A	A		A	A
AEGAMpCC,402	B	B		B	B		B	B		B	B		A	A		A	A		B	B		ABMR_03H10	B	B		B	B		B	B		A	A
AEGAMpCC,466	B	B		B	B		A	A		A	A		A	A		A	A		A	A		CABMR_03H14	A	A		B	B		A	A		A	A
AEGAMpCC,473	B	B		A	A		A	A		B	B		B	B		A	A		B	B		ABMR_03H18	B	B		A	A		B	B		A	A
AEGAMpCC,492	B	B		B	B		B	B		A	A		B	B		B	B		A	A		CABMR_03I08	B	-		B	B		A	A		A	A
AEGAMpCC,535	A	A		A	A		A	A		B	B		B	B		B	B		A	A		ABMR_03I10	A	A		A	A		A	A		B	B
AEGAMpCC,86	A	A		B	B		A	A		B	B		A	A		A	A		B	B		CABMR_03I13**	A	A		A	A		A	A		A	A
AEGAMpCC,91	B	B		B	B		A	A		B	B		A	A		A	A		B	B		ABMR_03J01	B	B		B	B		A	A		B	B
AEGAMpCC,96	B	B		A	A		B	B		A	A		A	A		B	B		A	A		ABMR_03J13	B	B		B	B		A	A		B	B
AEGAMpCG,114	B	B		A	A		B	B		B	B		B	B		B	B		A	A		CABMR_03J15	B	B		-	B		B	B		B	B
AEGAMpCG,168	B	B		A	A		B	B		B	B		B	B		A	A		A	A		CABMR_03J20*	A	A		A	A		A	A		A	A
AEGAMpCG,169	A	A		B	B		A	A		B	B		A	A		A	A		B	B		ABMR_03J24*	B	B		A	A		A	A		A	A
AEGAMpCG,248	B	B		A	A		B	B		B	B		A	A		A	A		A	A		ABMR_03K06	A	A		A	A		A	A		A	A
AEGAMpCG,296	B	B		A	A		B	B		B	B		B	B		B	B		B	B		ABMR_03L06	A	A		A	A		A	A		B	B
AEGAMpCG,312	B	B		A	A		B	B		A	A		A	A		A	A		A	A		CABMR_03M18	A	A		A	A		A	A		A	A
AEGAMpCG,346	B	B		B	B		A	A		B	B		B	B		B	B		A	A		ABMR_03M24	B	B		A	A		A	A		B	B
AEGAMpCG,97	B	B		A	A		A	A		B	B		A	A		A	A		A	A		CABMR_03O06*	A	A		B	B		A	A		A	A
AEGCMpCC,104	A	A		B	B		A	A		A	A		A	A		A	A		A	A		ABMR_03O18	B	B		B	B		A	A		A	A
AEGCMpCC,155	A	A		A	A		B	B		B	B		B	B		B	B		A	A		CABMR_03P12	A	A		B	B		A	A		A	A
AEGCMpCC,167	B	B		B	B		A	A		B	B		B	B		B	B		A	A		ABMR_03P23*	A	A		A	A		A	A		A	A
AEGCMpCC,185	A	A		B	B		A	A		B	B		B	B		A	A		B	B		CABMR_04D15	A	A		B	B		A	A		-	-
AEGCMpCC,189	B	B		B	B		A	A		B	B		A	A		A	A		B	B		CABMR_04E23	A	A		B	B		A	A		A	A
AEGCMpCC,217	B	B		B	B		B	B		B	B		B	B		A	A		B	B		CABMR_04F22	B	B		B	B		B	B		A	A
AEGCMpCC,259	B	B		A	A		A	A		B	B		A	A		A	A		B	B		ABMR_04H23	A	A		B	B		A	A		A	A
AEGCMpCC,311	B	B		A	A		B	B		B	B		B	B		A	A		A	A		CABMR_04I19	B	B		B	B		A	A		B	B
AEGCMpCC,419	B	B		B	B		B	B		A	A		A	A		A	A		B	B		CABMR_04J06	A	A		A	A		A	A		A	A
AEGCMpCC,81	A	A		B	B		A	A		B	B		B	B		A	A		B	B		ABMR_04J07	B	B		B	B		B	B		A	A
AEGGMpAT,188	B	B		A	A		B	B		B	B		B	B		A	A		B	B		CABMR_04K10	A	A		B	B		B	B		A	A
AEGGMpAT,214	B	B		A	A		B	B		A	A		A	A		A	A		A	A		ABMR_04K14*	A	A		A	A		A	A		A	A
AEGGMpAT,248	B	B		B	B		A	A		B	B		A	A		A	A		B	B		CABMR_04K19	B	B		B	B		A	A		A	A
AEGGMpAT,271	B	B		B	B		B	B		A	A		A	A		A	A		B	B		ABMR_04K20	A	A		B	B		-	-		A	A
AEGGMpAT,351	A	A		A	A		B	B		B	B		B	B		B	B		A	A		ABMR_04L21	B	B		B	B		A	A		B	B
AEGGMpAT,392	B	B		B	B		A	A		B	B		A	A		A	A		B	B		ABMR_04M04	A	A		B	B		A	A		B	B
AEGGMpAT,428	A	A		B	B		A	A		B	B		A	A		A	A		B	B		ABMR_04M05*	A	A		A	A		A	A		A	A
AEGGMpAT,447	B	B		B	B		A	A		B	B		B	B		B	B		A	A		CABMR_04N23	A	A		B	B		B	B		A	A
AEGGMpAT,619	A	A		A	A		A	A		B	B		A	A		B	B		B	B		ABMR_04N24	B	B		-	B		A	A		A	A
AEGGMpAT,83	B	B		A	A		A	A		B	B		B	B		B	B		A	A		CABMR_04O10	B	B		A	A		B	B		B	B
AEGGMpCG,101	B	B		B	B		B	B		B	B		B	B		B	B		A	A		CABMR_04O18**	A	A		B	B		A	A		A	A
AEGGMpCG,129	A	A		A	A		B	B		B	B		A	A		A	A		B	B		ABMR_04O20	B	B		A	A		B	B		A	A
AEGGMpCG,137	A	A		B	B		B	B		A	A		B	B		A	A		B	B		CABMR_04O23	A	A		B	B		A	A		A	A
AEGGMpCG,164	A	A		B	B		A	A		B	B		A	A		A	A		B	B		CABMR_04P01	A	A		A	A		A	A		A	A
AEGGMpCG,167	B	B		A	A		B	B		B	B		-	A		B	B		A	A		CABMR_04P19	A	A		A	A		A	A		B	B
AEGGMpCG,181	B	B		B	B		B	B		A	A		A	A		A	A		B	B		CABMR_04P23	A	A		B	B		A	A		-	A
AEGGMpCG,185	A	A		A	A		B	B		A	A		A	A		A	A		A	A		ABMR_05A24	A	A		B	B		B	B		A	A
AEGGMpCG,201	B	B		A	A		A	A		A	-		B	B		-	A		B	B		ABMR_05B13	A	A		B	B		A	A		B	B
AEGGMpCG,225	A	A		A	A		B	B		B	B		B	B		B	B		A	A		CABMR_05B21	A	A		A	A		B	B		B	B
AEGGMpCG,261	A	A		A	A		A	A		B	B		A	A		A	A		B	B		ABMR_05C04	A	A		B	B		A	A		A	A
AEGGMpCG,262	B	B		B	B		A	A		B	B		B	B		B	B		A	A		ABMR_05E23	B	B		B	B		A	A		A	A
AEGGMpCG,314	A	A		B	B		A	A		B	B		B	B		A	A		A	A		ABMR_05G15	A	A		A	-		-	-		B	B
AEGGMpCG,625	A	A		B	B		A	A		A	-		B	B		B	B		A	A		ABMR_05H15	B	B		A	A		A	A		B	B
AEGTMpAT,180	A	A		B	B		A	A		A	A		B	B		A	A		B	B		ABMR_05H19	B	B		A	A		B	B		B	B
AEGTMpAT,221	B	B		B	B		A	A		B	B		A	A		A	A		B	B		ABMR_05H22	A	A		A	A		B	B		A	A
AEGTMpAT,284	B	B		A	A		A	A		A	A		A	A		B	B		A	A		CABMR_05H23	B	B		B	B		A	A		B	B
AEGTMpAT,323	A	A		B	B		A	A		A	A		B	B		B	B		A	A		ABMR_05I17	A	A		B	B		B	B		A	A
AEGTMpAT,339	A	A		B	B		A	A		B	B		A	A		A	A		B	B		ABMR_05I21*	A	A		B	B		A	A		A	A
AEGTMpAT,361	B	B		B	B		B	B		B	B		B	B		B	B		A	A		ABMR_05J13	A	A		B	B		B	B		A	A
AEGTMpAT,368	B	B		B	B		B	B		A	A		A	A		A	A		B	B		ABMR_05J18	B	B		B	B		A	A		A	A
AEGTMpAT,398	A	A		A	A		A	A		B	B		A	A		B	B		B	B		ABMR_05J19	A	A		B	B		A	A		A	A
AEGTMpAT,418	B	B		B	B		A	A		A	A		B	B		A	A		B	B		ABMR_05J22	A	A		B	B		A	A		A	A
AEGTMpAT,442	A	A		B	B		B	B		B	B		B	B		B	B		A	A		ABMR_05J23	A	A		B	B		B	B		A	A
AEGTMpAT,489	B	B		A	A		B	B		B	B		B	B		A	A		A	A		ABMR_05K18	A	A		B	B		A	A		A	A
AEGTMpAT,567	A	A		B	B		A	A		B	B		B	B		B	B		A	A		ABMR_05L12	B	B		A	A		A	A		A	A
AEGTMpAT,579	A	A		B	B		A	A		B	B		A	A		B	B		A	A		CABMR_05L23*	B	B		A	A		A	A		A	A
AEGTMpAT,655	A	A		B	B		A	A		A	A		B	B		A	A		B	B		ABMR_05M03	A	A		B	B		A	A		A	A
AEGTMpAT,697	A	A		A	A		A	A		B	B		B	B		B	B		A	A		ABMR_05N01	A	A		B	B		A	A		A	A
AEGTMpAT,725	B	B		A	A		B	B		A	A		A	A		A	A		A	A		ABMR_05N03**	B	B		A	A		A	A		A	A
AEGTMpAT,792	A	A		A	A		A	A		B	B		A	A		B	B		A	A		ABMR_05N06	A	A		B	B		A	A		A	A
AEGTMpAT,89	A	A		A	A		B	B		B	B		A	A		A	A		A	A		ABMR_05N21	A	A		B	B		B	B		A	A
AEGTMpAT,905	B	B		B	B		B	B		-	A		B	B		B	B		B	B		CABMR_05O14	B	B		B	B		A	A		-	-
AEGTMpAT,97	A	A		B	B		A	A		B	B		B	B		A	A		B	B		ABMR_05O20	B	-		B	B		A	A		A	A
BEATMpAG,136	B	B		B	B		B	B		A	A		A	A		A	A		B	B		ABMR_05O21	B	B		B	B		A	A		A	A
BEATMpAG,138	A	A		A	A		B	B		A	A		B	B		B	B		A	A		ABMR_05P05	A	A		B	B		B	B		B	B
BEATMpAG,204	A	A		B	B		B	B		A	A		B	B		A	A		B	B		ABMR_05P16	B	B		B	B		A	A		B	B
BEATMpAG,249	B	B		A	A		B	B		B	B		A	A		A	A		B	B		ABMR_05P21	B	B		B	B		A	A		B	B
BEATMpAG,255	A	A		B	B		B	B		A	A		B	B		A	A		B	B		ABMR_05P24	B	B		B	B		A	A		B	-
BEATMpAG,270	B	B		A	A		B	B		A	A		A	A		A	A		B	B		ABMR_01A07	B	B		A	A		B	B		A	A
BEATMpAG,305	B	B		B	B		B	B		A	A		A	A		A	A		B	B		ABMR_01A09	B	B		B	B		A	A		A	A
BEATMpAG,329	A	A		A	A		A	A		A	A		B	B		A	A		B	B		CABMR_01A17	B	B		B	B		A	A		B	B
BEATMpAG,390	B	B		B	B		B	B		A	A		B	B		B	B		A	A		ABMR_01A19	A	A		B	B		A	A		A	A
BEATMpCG,165	A	A		B	B		A	A		B	B		B	B		B	B		A	A		ABMR_01B01	B	B		B	B		A	A		B	B
BEATMpCG,198	B	B		A	A		A	A		A	A		B	B		A	A		B	B		CABMR_01B03	B	B		B	B		A	A		B	B
BEATMpCG,206	B	B		A	A		B	B		B	B		A	A		B	B		A	A		ABMR_01C09	A	A		B	B		B	B		A	A
BEATMpCG,266	B	B		A	A		A	A		A	A		A	A		B	B		B	B		CABMR_01C12	A	A		B	B		B	B		A	A
BEATMpCG,307	A	A		A	A		B	B		A	A		A	A		A	A		B	B		ABMR_01C23	B	B		A	A		B	B		B	B
BEATMpCG,470	-	B		A	A		B	B		B	B		B	B		B	B		A	A		CABMR_01C24	A	A		A	A		A	A		B	B
BEATMpCG,630	B	B		A	A		B	B		B	B		A	A		A	A		B	B		CABMR_01E01	A	A		A	A		B	B		A	A
BEATMpCG,670	B	B		A	A		B	B		B	B		A	A		A	A		B	B		CABMR_01E02	B	B		B	B		A	A		A	A
BEATMpCG,88	B	B		A	A		B	B		B	B		B	B		B	B		A	A		CABMR_01E03*	A	A		A	A		A	A		A	A
BEATMpCG,92	B	B		B	B		A	A		A	A		B	B		B	B		A	A		ABMR_01G03	A	A		A	A		B	B		A	A
BEGAMpAC,129	B	B		A	A		B	B		B	B		B	B		B	B		A	A		ABMR_01I11	B	B		B	B		B	B		A	A
BEGAMpAC,133	A	A		A	A		B	B		B	B		B	B		A	A		B	B		ABMR_01I13	B	B		B	B		A	A		B	B
BEGAMpAC,142	A	A		A	A		A	A		A	B		A	A		A	A		B	B		ABMR_01J04	-	B		B	B		B	B		A	A
BEGAMpAC,149	A	A		A	A		A	A		A	A		B	B		A	A		B	B		ABMR_01K05	B	B		B	B		A	A		A	A
BEGAMpAC,198	B	B		A	A		B	B		A	A		A	A		B	B		B	B		CABMR_01K07	A	A		B	B		A	A		A	A
BEGAMpAC,271	B	B		B	B		B	B		A	A		B	B		A	A		B	B		CABMR_01K22	B	B		A	A		A	A		B	B
BEGAMpAC,278	B	B		A	A		A	A		B	B		A	A		B	B		A	A		ABMR_01L08	A	A		B	B		A	A		A	A
BEGAMpAC,314	B	B		A	A		B	B		A	A		B	B		A	A		B	B		CABMR_01L15	B	B		A	A		A	A		A	A
BEGAMpAC,324	B	B		B	B		A	A		B	B		B	B		B	B		B	B		ABMR_01L24	A	A		A	A		A	A		B	B
BEGAMpAC,334	A	A		A	A		A	A		B	B		A	A		A	A		B	B		CABMR_01M07	A	A		A	A		A	A		B	B
BEGAMpAC,386	A	A		A	A		B	B		A	A		B	B		B	B		A	A		ABMR_01M20	A	A		B	B		A	A		A	A
BEGAMpAC,501	B	B		B	B		B	B		A	A		B	B		A	A		B	B		CABMR_01N02	A	A		A	A		B	B		A	A
BEGAMpAC,579	B	B		A	A		B	B		A	A		A	A		B	B		B	B		ABMR_01N13	A	A		B	B		B	B		A	A
BEGAMpAC,87	A	A		B	B		B	B		A	A		B	B		B	B		A	A		ABMR_01N22	B	B		B	B		A	A		A	A
BEGAMpAG,119	B	B		A	A		B	B		A	A		B	B		B	B		A	A		ABMR_01O06	B	B		A	A		B	B		A	A
BEGAMpAG,125	B	B		A	A		B	B		A	A		A	A		B	B		B	B		ABMR_01O10	B	B		A	A		B	B		A	A
BEGAMpAG,137	B	B		A	A		A	A		B	B		A	A		B	B		A	A		CABMR_01O17	A	A		A	A		B	B		A	A
BEGAMpAG,182	B	B		A	A		A	A		B	B		A	A		A	A		B	B		CABMR_01O19	A	A		B	B		B	B		B	B
BEGAMpAG,186	B	B		B	B		A	A		A	A		B	B		B	B		A	A		CABMR_01O20*	A	A		A	A		A	A		A	A
BEGAMpAG,190	A	A		A	A		A	A		B	B		A	A		A	A		B	B		ABMR_01O23	A	A		B	B		B	B		A	A
BEGAMpAG,201	A	A		B	B		B	B		A	A		B	B		A	A		B	B		CABMR_07A05	B	B		B	B		A	A		B	B
BEGAMpAG,233	B	B		A	A		A	A		A	A		A	A		B	B		B	B		ABMR_07A16	B	B		B	B		A	A		B	B
BEGAMpAG,248	B	B		A	A		A	A		A	A		A	A		A	A		B	B		ABMR_07A18	B	B		A	A		A	A		A	A
BEGAMpAG,255	A	A		B	B		A	A		A	A		B	B		B	B		B	B		ABMR_07B15	A	A		B	B		A	A		A	A
BEGAMpAG,489	-	B		A	A		B	B		A	A		B	B		B	B		A	A		ABMR_07C14	A	A		A	A		A	A		A	A
BEGAMpAG,513	A	A		B	B		B	B		B	B		B	B		A	A		B	B		CABMR_07D02	B	B		A	A		A	A		A	A
BEGAMpAG,517	B	B		A	A		B	B		A	A		B	B		B	B		A	A		CABMR_07D04	A	A		B	B		A	A		A	A
BEGAMpAG,81	B	B		B	B		A	A		A	A		B	B		B	B		B	B		CABMR_07D07	A	A		B	B		A	A		A	A
BEGAMpCA,125	A	A		A	A		A	A		B	B		B	B		A	A		B	B		ABMR_07D17	B	B		B	B		A	A		B	B
BEGAMpCA,199	A	A		B	B		B	B		B	B		A	A		B	B		B	B		CABMR_07E18*	A	A		A	A		A	A		A	A
BEGAMpCA,243	A	A		B	B		A	A		A	A		B	B		B	B		B	B		CABMR_07E19	A	A		A	A		B	B		B	B
BEGAMpCA,385	A	A		A	A		B	B		A	A		B	B		B	B		A	-		ABMR_07F10	A	A		B	B		A	A		A	A
BEGAMpCA,428	B	B		A	A		B	B		B	B		B	B		A	-		B	B		ABMR_07F15	B	B		B	B		A	A		B	B
BEGAMpCA,450	B	B		B	B		B	B		A	A		B	B		A	A		B	B		ABMR_07G20	B	B		B	B		A	A		B	B
BEGAMpCA,482	B	B		A	A		B	B		A	A		A	A		A	A		B	B		CABMR_07H02	B	B		B	B		A	A		A	A
BEGAMpCA,74	B	B		B	B		A	A		A	A		B	B		B	B		B	B		CABMR_07H13	A	A		B	B		A	A		A	A
BEGAMpCA,80	A	A		B	B		B	B		A	A		B	B		A	A		B	B		ABMR_07H18	B	B		B	B		A	A		B	B
BEGAMpCA,83	B	B		A	A		A	A		B	B		A	A		A	A		B	B		CABMR_07I21	A	A		B	B		A	A		A	A
BEGAMpCC,100	B	B		A	A		A	A		B	B		A	A		A	A		B	B		CABMR_07I24	B	B		B	B		A	A		B	B
BEGAMpCC,202	A	A		A	A		B	B		B	B		A	A		A	A		A	A		ABMR_07J01	A	A		B	B		B	B		A	A
BEGAMpCC,230	A	A		B	B		A	A		A	A		B	B		B	B		B	B		ABMR_07J24	B	B		A	A		B	B		A	A
BEGAMpCC,240	B	B		B	B		B	B		A	A		B	B		A	A		A	A		CABMR_07K05	A	A		A	A		A	A		A	A
BEGAMpCC,267	A	A		B	B		B	B		A	A		B	B		A	A		B	B		ABMR_07K06*	A	A		A	A		A	A		A	A
BEGAMpCC,277	A	A		B	B		A	A		A	A		B	B		B	B		B	B		CABMR_07K23	A	A		B	B		A	A		A	A
BEGAMpCC,285	B	B		A	A		B	B		A	A		A	A		A	A		B	B		ABMR_07L03	A	A		B	B		A	A		A	A
BEGAMpCC,317	B	B		B	B		B	B		A	A		B	B		A	A		B	B		ABMR_07L04	A	A		B	B		A	A		A	A
BEGAMpCC,336	A	A		A	A		B	B		B	B		A	A		A	A		A	A		CABMR_07L05	A	A		B	B		B	B		A	A
BEGAMpCC,78	B	B		A	A		B	B		A	A		B	B		B	B		A	A		ABMR_07L14	A	A		B	B		B	B		A	A
BEGAMpCC,94	A	A		B	B		B	B		B	B		B	B		B	B		B	B		ABMR_07L18*******	A	A		A	A		A	A		A	A
BEGAMpCG,104	A	A		A	A		A	A		A	A		A	A		B	B		B	B		CABMR_07M04	A	A		B	B		A	A		A	A
BEGAMpCG,141	A	A		B	B		B	B		A	A		B	B		B	B		A	A		ABMR_07M17	A	A		A	A		A	A		A	-
BEGAMpCG,155	A	A		B	B		B	B		A	A		B	B		B	B		A	A		CABMR_07M19**	A	A		B	B		A	A		A	A
BEGAMpCG,157	B	B		B	B		B	B		A	A		B	B		A	A		B	B		CABMR_07M23	B	B		B	B		A	A		B	B
BEGAMpCG,194	B	B		B	B		B	B		A	A		B	B		A	A		A	A		CABMR_07N05	B	B		B	B		A	A		A	A
BEGAMpCG,200	A	A		A	A		A	A		B	B		B	B		B	B		A	A		ABMR_07N15	A	A		A	A		A	A		A	A
BEGAMpCG,293	A	A		A	A		B	B		A	A		A	A		A	A		B	B		CABMR_07N16	B	B		B	B		A	A		B	B
BEGCMpCC,121	A	A		B	B		A	A		A	A		A	A		B	B		B	B		ABMR_07O04	A	A		B	B		B	B		A	A
BEGCMpCC,151	B	B		B	B		A	A		B	B		B	B		B	B		B	B		ABMR_07O10	A	A		B	B		-	-		A	A
BEGCMpCC,166	A	A		A	A		B	B		A	A		A	A		A	A		B	B		ABMR_07O18	B	B		B	B		A	A		B	B
BEGCMpCC,228	B	B		A	A		B	B		A	A		A	A		B	B		A	A		CABMR_07O23	A	A		A	A		A	A		A	A
BEGCMpCC,244	A	A		B	B		B	B		A	A		B	B		A	A		B	B		CABMR_07P03	B	B		B	B		A	A		A	A
BEGCMpCC,91	B	B		A	A		B	B		A	A		A	A		A	A		B	B		CABMR_07P09	A	A		A	A		A	A		B	B
BEGGMpAT,114	A	A		A	A		A	A		B	B		B	B		B	B		A	A		CABMR_07P10	B	B		B	B		A	A		A	A
BEGGMpAT,139	A	A		B	B		A	A		A	A		B	B		B	B		B	B		CABMR_07P12	A	A		B	B		A	A		A	A
BEGGMpAT,157	B	B		A	A		B	B		A	A		A	A		A	A		B	B		CABMR_07P14	A	A		B	B		A	A		A	A
BEGGMpAT,168	B	B		A	A		B	B		A	A		A	A		B	B		A	A		ABMR_08A01	A	A		A	A		B	B		A	A
BEGGMpAT,198	B	B		B	B		A	A		A	A		A	A		A	A		B	B		CABMR_08A19	A	A		B	B		A	A		A	A
BEGGMpAT,202	A	A		B	B		B	B		B	B		B	B		A	A		B	B		ABMR_08A24	B	B		B	B		A	A		A	A
BEGGMpAT,234	B	B		B	B		B	B		A	A		-	A		B	B		B	B		CABMR_08B03	B	B		B	B		A	A		B	B
BEGGMpAT,281	A	A		A	A		B	B		B	B		A	A		A	A		A	A		ABMR_08B07	B	B		B	B		A	A		B	B
BEGGMpAT,364	B	B		B	B		A	A		B	B		A	A		B	B		A	A		CABMR_08B19	A	A		B	B		A	A		A	A
BEGGMpAT,396	B	B		B	B		B	B		A	A		B	B		A	A		B	B		ABMR_08D24	A	A		A	A		B	B		A	A
BEGGMpAT,401	B	B		A	A		B	B		A	A		A	A		A	A		B	B		CABMR_08E02*	A	A		B	B		A	A		A	A
BEGGMpAT,442	B	B		A	A		B	B		A	A		A	A		A	A		B	B		CABMR_08E04	A	A		B	B		B	B		A	A
BEGGMpAT,570	A	A		B	B		B	B		B	B		B	B		A	A		B	B		ABMR_08E20	B	B		A	A		B	B		A	A
BEGGMpAT,598	B	B		A	A		B	B		B	B		A	A		A	A		B	B		ABMR_08F01	B	B		B	B		A	A		B	B
BEGGMpCG,104	A	A		A	A		B	B		A	A		A	A		A	A		B	B		ABMR_08F04	A	A		B	B		A	A		A	A
BEGGMpCG,106	B	B		A	A		B	B		A	A		B	B		B	B		A	A		ABMR_08G07	A	A		A	A		A	A		B	B
BEGGMpCG,144	B	B		A	A		B	B		A	A		A	A		B	B		A	A		ABMR_08G09	A	A		B	B		B	B		B	B
BEGGMpCG,208	B	B		A	A		A	A		B	B		A	A		A	A		B	B		CABMR_08G14	A	A		B	B		B	B		A	A
BEGGMpCG,238	A	A		A	A		A	A		B	B		B	B		B	B		A	A		ABMR_08H01	B	B		A	A		A	A		B	B
BEGGMpCG,298	A	A		A	A		B	B		A	A		A	A		A	A		B	B		ABMR_08H09	A	A		B	B		A	A		A	A
BEGGMpCG,421	A	A		B	B		A	A		B	B		A	A		B	B		A	A		CABMR_08I02	B	B		B	B		A	A		B	B
BEGGMpCG,431	A	A		A	A		A	A		B	B		-	A		-	A		A	A		CABMR_08J01	B	B		B	B		A	A		A	A
BEGGMpCG,475	B	B		A	A		B	B		A	A		B	B		B	B		A	A		ABMR_08J09	A	A		A	A		B	B		A	A
BEGGMpCG,68	A	A		A	A		B	B		B	B		B	B		-	A		B	B		CABMR_08J15	B	B		B	B		A	A		A	A
BEGGMpCG,741	B	B		A	A		A	A		B	B		B	A		A	A		B	B		ABMR_08K17	A	A		A	A		A	A		A	A
BEGTMpAT,128	A	A		A	A		A	A		B	B		B	B		A	A		B	B		ABMR_08K20	B	B		B	B		A	A		A	A
BEGTMpAT,157	B	B		B	B		A	A		B	B		A	A		B	B		A	A		CABMR_08K24	A	A		B	B		A	A		A	A
BEGTMpAT,209	A	A		A	A		A	A		A	A		A	A		A	A		B	B		CABMR_08L05*	B	B		A	A		A	A		A	A
BEGTMpAT,232	A	A		B	B		A	A		B	B		A	A		B	B		A	A		ABMR_08L11	A	A		B	B		A	A		A	A
BEGTMpAT,287	B	B		B	B		B	B		A	A		B	B		A	A		B	B		CABMR_08L14	A	A		A	A		B	B		A	A
BEGTMpAT,311	A	A		A	A		A	A		B	B		B	B		A	A		B	B		ABMR_08L18	A	A		B	B		B	B		B	B
BEGTMpAT,372	B	B		A	A		A	A		-	A		B	B		A	A		B	B		ABMR_08N21	A	A		B	B		B	B		A	A
BEGTMpAT,453	B	B		A	A		A	A		A	A		A	A		A	A		B	B		ABMR_08O08	A	A		B	B		B	B		B	B
BEGTMpAT,476	A	A		A	A		B	B		A	A		A	A		A	A		B	B		ABMR_08O14	B	B		-	B		A	A		A	A
BEGTMpAT,676	A	A		A	A		A	A		B	B		B	B		B	B		A	A		CABMR_08O18	B	B		B	B		A	A		A	A
BEGTMpAT,692	B	B		A	A		B	B		A	A		B	B		B	B		A	A		ABMR_08O20	A	A		B	B		B	B		A	A
BEGTMpAT,813	A	A		B	B		B	B		A	A		A	A		A	A		B	B		ABMR_08P12	B	B		A	A		A	A		A	A
BEGTMpAT,92	B	B		B	B		B	B		A	A		B	B		A	A		B	B		BBMR_09A19	A	A		B	B		A	A		A	A
BEGTMpAT,95	A	A		A	A		A	A		B	B		A	A		A	A		B	B		BBMR_09A21	A	A		B	B		A	A		A	A
																						CBBMR_09B23	B	B		B	B		A	A		B	B
																						CBBMR_09C04	A	A		B	B		A	A		A	A
																						CBBMR_09C10	B	B		A	A		B	B		A	A
																						ABMR_09C11	A	A		A	A		B	B		A	A
																						BBMR_09C23	A	A		B	B		A	A		A	A
																						ABMR_09E02	B	B		B	B		A	A		B	B
																						BBMR_09E12	A	A		A	A		A	A		A	A
																						ABMR_09I04	A	A		B	B		B	B		A	A
																						CBBMR_09I17	A	A		A	A		A	A		A	A
																						CBBMR_09J03	B	B		B	B		B	B		B	B
																						BBMR_09J15	A	A		A	A		A	A		A	A
																						CBBMR_09J20	A	A		A	A		A	A		A	A
																						ABMR_09J21	A	A		A	A		A	A		B	B
																						ABMR_09J23	B	B		B	B		A	A		A	A
																						ABMR_09K12	A	A		B	B		A	A		A	A
																						ABMR_09K19	B	B		B	B		A	A		B	B
																						CBBMR_09L05	B	B		B	B		B	B		B	B
																						BBMR_09L07	A	A		B	B		A	A		B	B
																						BBMR_09L17	A	A		A	A		A	A		A	A
																						BBMR_09M06	A	A		B	B		A	A		A	A
																						ABMR_09M09	B	B		B	B		A	A		B	B
																						CBBMR_09M11	-	-		B	B		A	A		B	B
																						ABMR_09M18	B	B		B	B		A	A		A	A
																						CBBMR_09M23	A	A		A	A		A	A		A	A
																						ABMR_09O12	A	A		B	B		A	A		A	A
																						CBBMR_09P05**	A	A		B	B		A	A		A	A
																						CBBMR_10A19	A	A		B	B		A	A		A	A
																						BBMR_10A23	A	A		A	A		A	A		A	A
																						BBMR_10B03	A	A		A	A		A	A		A	A
																						CBBMR_10B09	A	A		B	B		A	A		A	A
																						BBMR_10B16	A	A		A	A		A	A		A	A
																						CBBMR_10B19	A	A		A	A		A	A		A	A
																						ABMR_10B21*	B	B		A	A		A	A		A	A
																						CBBMR_10B23	A	A		B	B		B	B		B	B
																						CBBMR_10C10*	B	B		A	A		B	B		A	A
																						ABMR_10C13	A	A		B	B		A	A		A	A
																						CBBMR_10C19	A	A		A	A		A	A		A	A
																						BBMR_10D05	A	A		A	A		A	A		A	A
																						BBMR_10D11	A	A		B	B		A	-		A	A
																						ABMR_10D16	A	A		A	A		A	A		B	B
																						ABMR_10D19	A	A		A	A		B	B		A	A
																						ABMR_10E12	B	B		B	B		A	A		A	A
																						ABMR_10E14	A	A		B	B		A	A		A	A
																						BBMR_10E18	A	A		A	A		A	A		A	A
																						ABMR_10E24	A	A		B	B		B	B		A	A
																						CBBMR_10F14	B	B		B	B		A	A		B	B
																						ABMR_10G06	B	B		B	B		A	A		B	B
																						CBBMR_10G11	B	B		B	B		A	A		B	B
																						BBMR_10H01	A	A		B	B		A	A		A	A
																						ABMR_10H05	B	B		A	A		A	A		B	B
																						ABMR_10H18	B	B		B	B		A	A		B	B
																						ABMR_10I03	B	B		B	B		A	A		B	B
																						BBMR_10I24	B	B		B	B		A	A		B	B
																						BBMR_10J11	A	A		B	B		A	A		A	A
																						ABMR_10J13**	B	B		A	A		A	A		A	A
																						CBBMR_10J15	A	A		B	B		B	B		B	B
																						BBMR_10K02	A	A		B	B		A	A		A	A
																						CBBMR_10K04	B	B		B	B		A	A		B	B
																						CBBMR_10K06	A	A		B	B		A	A		A	A
																						CBBMR_10K24	B	B		B	B		A	A		B	B
																						BBMR_10L08	A	A		-	A		A	A		A	A
																						CBBMR_10M04	A	A		B	B		A	A		B	B
																						ABMR_10M06	A	A		B	B		B	B		A	A
																						ABMR_10M22	A	A		B	B		A	A		A	A
																						ABMR_10N24	B	B		B	B		A	A		B	B
																						BBMR_10O02	A	A		B	B		A	A		-	-
																						BBMR_10O16	A	A		A	A		A	A		A	A
																						ABMR_10O20	B	B		A	A		B	B		A	A
																						ABMR_10P06	A	A		B	B		B	B		A	A
																						BBMR_10P15	A	A		A	A		A	A		A	A
																						CBBMR_11B02	A	A		A	A		-	-		A	A
																						BBMR_11C21	A	A		A	A		A	A		A	A
																						ABMR_11D04	A	A		A	A		A	A		A	A
																						BBMR_11E01	A	A		B	B		A	A		A	A
																						CBBMR_11E02	B	B		A	A		A	A		A	A
																						BBMR_11E07	A	A		A	A		A	A		A	A
																						ABMR_11E14	A	A		B	B		B	B		A	A
																						BBMR_11E24	B	B		B	B		A	A		B	B
																						ABMR_11F16	B	B		B	B		A	A		B	B
																						BBMR_11G04	A	A		A	A		A	A		A	A
																						ABMR_11H15	B	B		A	A		B	B		B	B
																						CBBMR_11I13	A	A		B	B		A	A		A	A
																						BBMR_11J04	A	A		B	B		A	A		A	A
																						ABMR_11J07	A	-		A	A		-	B		B	B
																						BBMR_11K06	A	A		B	B		A	A		A	A
																						ABMR_11L01	B	B		B	B		A	A		A	A
																						BBMR_11L21	A	A		A	A		A	A		A	A
																						BBMR_11N06	A	A		A	A		A	A		A	A
																						BBMR_11N20	A	A		A	A		A	A		A	A
																						CBBMR_11N22	A	-		A	A		A	A		B	-
																						CBBMR_11O13	B	B		B	B		A	A		B	B
																						ABMR_11O15	A	A		B	B		A	A		A	A
																						ABMR_11O20	A	A		-	B		A	A		A	-
																						BBMR_11P06	A	A		A	A		A	A		A	A
																						ABMR_11P08	B	B		B	B		A	A		B	B
																						BBMR_12A21	A	A		B	B		A	A		A	A
																						BBMR_12B03	A	A		A	A		A	A		A	A
																						ABMR_12B08	B	B		A	A		B	B		B	B
																						BBMR_12C01	A	A		A	A		A	A		A	A
																						BBMR_12C03	B	B		B	B		A	A		A	-
																						ABMR_12D04	A	A		A	A		A	A		B	B
																						ABMR_12D05	B	B		A	A		A	-		B	B
																						ABMR_12F19**	B	B		A	A		A	A		A	A
																						ABMR_12F22	B	B		B	B		A	A		B	B
																						BBMR_12G07	A	A		A	A		A	A		A	A
																						ABMR_12H10	B	B		A	A		A	A		A	A
																						BBMR_12H19	A	A		B	B		A	A		A	A
																						ABMR_12I01	B	B		A	A		A	A		A	A
																						CBBMR_12I02	A	A		B	B		A	A		B	B
																						BBMR_12I11	A	A		A	A		A	A		A	A
																						BBMR_12I21	A	A		A	A		A	A		A	A
																						BBMR_12I22	A	-		A	A		A	A		A	A
																						CBBMR_12J04	B	B		B	B		A	A		B	B
																						BBMR_12K09	B	B		B	B		A	A		A	A
																						ABMR_12K16	B	B		B	B		A	A		B	B
																						BBMR_12K20	A	A		B	B		A	A		A	A
																						BBMR_12L03	A	A		B	B		A	A		A	A
																						BBMR_12L23	A	A		A	A		A	A		A	A
																						BBMR_12M01*	B	B		B	B		A	A		B	B
																						BBMR_12M14	A	A		A	A		A	A		A	A
																						BBMR_12M20	A	-		A	A		A	A		A	A
																						BBMR_12M23	A	A		-	A		A	A		A	A
																						BBMR_12N02	A	A		A	A		A	A		A	A
																						BBMR_12N14	A	A		-	A		B	B		A	A
																						ABMR_12O09	B	-		B	-		A	A		A	A
																						ABMR_12O21	B	B		B	B		A	A		B	B
																						ABMR_12P05	A	A		A	A		B	B		B	B
																						BBMR_12P08	A	A		A	A		A	A		A	A
																						ABMR_12P22*******	B	B		B	B		A	A		A	A
																						BBMR_13A03	A	A		B	B		A	A		A	A
																						CBBMR_13A04	A	A		B	B		B	B		B	B
																						ABMR_13A09	B	B		B	B		A	A		B	B
																						BBMR_13A15	A	A		B	B		A	A		A	A
																						CBMR_13A17	A	A		A	A		A	A		B	B
																						ABMR_13A18	A	A		A	A		A	A		B	B
																						BBMR_13C07	A	A		A	A		A	A		A	A
																						ABMR_13C13	A	A		B	B		A	A		A	A
																						BBMR_13C18	A	A		A	A		A	A		A	A
																						ABMR_13C19	A	A		B	B		B	B		B	B
																						BBMR_13D02	A	A		A	A		A	A		A	A
																						ABMR_13D09	B	B		B	B		A	A		B	B
																						BBMR_13D22**	B	B		B	B		A	A		B	B
																						BBMR_13D23	A	A		B	B		A	A		B	B
																						CBBMR_13E15	B	B		B	B		A	A		B	B
																						BBMR_13E20	A	A		A	A		A	A		A	A
																						ABMR_13F03	A	A		B	B		A	A		B	B
																						ABMR_13F23	B	B		B	B		A	A		B	B
																						BBMR_13G02	A	A		A	A		A	A		A	A
																						BBMR_13G12	B	B		B	B		A	A		B	B
																						BBMR_13H04	A	A		A	A		A	A		A	A
																						ABMR_13H16	A	A		B	B		B	B		A	A
																						ABMR_13I08	B	B		B	B		B	B		A	A
																						BBMR_13J11	A	A		B	B		A	A		A	A
																						ABMR_13J19	B	B		B	B		A	A		-	B
																						ABMR_13K01	B	B		B	B		A	A		B	B
																						BBMR_13K02	A	A		A	A		A	A		A	A
																						ABMR_13K08	A	A		B	B		A	A		B	B
																						BBMR_13L06	A	A		A	A		A	A		A	A
																						BBMR_13L09	A	A		B	B		A	A		A	A
																						ABMR_13L11	A	A		A	A		B	B		A	A
																						BBMR_13L12	A	A		A	A		A	A		A	A
																						ABMR_13M03	A	A		A	A		A	A		A	A
																						ABMR_13M05	A	A		A	A		A	A		B	B
																						ABMR_13M15	B	B		B	B		A	A		B	B
																						BBMR_13M17	A	A		B	B		A	A		A	A
																						CBBMR_13M23	B	B		B	B		A	A		A	A
																						CBBMR_13N08	A	A		B	B		A	A		A	A
																						BBMR_13O01	B	B		A	A		A	A		A	A
																						ABMR_13O03	B	B		B	B		B	B		A	A
																						CBBMR_13O05	A	A		B	B		B	B		B	B
																						BBMR_13O19	A	A		A	A		A	A		A	A
																						CBBMR_13O22	A	A		B	B		A	A		A	A
																						ABMR_13P06	A	A		B	B		B	B		A	A
																						CBBMR_13P16	A	A		B	B		B	B		A	A
																						BBMR_14A14	A	A		A	A		A	A		A	A
																						BBMR_14B20	A	A		A	A		A	-		-	A
																						BBMR_14C05	A	A		A	A		A	A		A	A
																						CBBMR_14C18	B	B		B	B		A	A		A	A
																						ABMR_14D06	B	B		A	A		B	-		A	A
																						CBBMR_14D07	B	B		B	B		A	A		A	A
																						BBMR_14E02	A	A		A	A		A	A		A	A
																						CBBMR_14E05	B	B		A	A		A	A		B	B
																						BBMR_14E11	A	A		B	B		A	A		B	B
																						BBMR_14E14	A	A		A	A		A	A		-	A
																						ABMR_14E17	A	A		B	B		A	A		A	A
																						BBMR_14G02	A	A		A	A		A	A		A	A
																						CBBMR_14G17	B	B		B	B		A	A		A	A
																						BBMR_14H02	B	B		B	B		A	A		A	A
																						BBMR_14H23	A	A		A	A		A	A		A	A
																						BBMR_14I22	A	A		A	A		A	A		-	-
																						CBBMR_14J04	B	B		A	A		B	B		A	-
																						ABMR_14J13	A	A		B	B		B	B		A	A
																						CBBMR_14J14	A	A		B	B		A	A		B	B
																						BBMR_14K01	A	A		B	B		A	A		A	A
																						ABMR_14L12	B	B		B	B		A	A		B	B
																						ABMR_14L23	B	B		B	B		A	A		B	B
																						ABMR_14M03	A	A		A	A		A	A		A	A
																						ABMR_14M05	A	A		B	B		A	A		A	A
																						ABMR_14M13	A	A		A	A		A	A		B	B
																						BBMR_14M14	A	A		B	B		A	A		A	A
																						ABMR_14M17	A	A		B	B		A	A		A	A
																						CBBMR_14M22	A	A		B	B		A	A		B	B
																						BBMR_14N01	A	A		A	A		A	A		A	A
																						BBMR_14N09	A	A		A	A		A	A		A	A
																						CBBMR_14O07	A	A		B	B		B	B		B	B
																						CBBMR_14P08	B	B		B	B		B	B		A	A
																						ABMR_14P09	A	A		B	B		B	B		A	A
																						ABMR_14P21*	B	B		A	A		A	A		A	A
																						ABMR_14P23	B	B		B	B		B	B		B	B
																						CBMR_15A02	A	A		B	B		A	A		A	A
																						BBMR_15A20	A	A		B	B		A	A		A	A
																						ABMR_15A21	A	A		B	B		B	B		B	B
																						CBBMR_15B01	A	A		B	B		B	B		B	B
																						BBMR_15B02	A	A		A	A		A	A		-	A
																						BBMR_15B03	A	A		A	A		A	A		A	A
																						CBBMR_15B17	B	B		A	A		A	A		A	A
																						ABMR_15B20	B	B		B	B		A	A		B	B
																						BBMR_15B21	A	A		A	A		A	A		A	A
																						ABMR_15C20	A	A		A	A		A	A		B	B
																						CBBMR_15D08	B	-		B	B		A	A		B	B
																						ABMR_15D24*	B	B		A	A		A	A		A	-
																						BBMR_15E04	A	A		A	A		A	A		A	A
																						ABMR_15E06	B	B		B	B		A	A		B	B
																						ABMR_15E18	B	B		A	A		B	B		B	B
																						BBMR_15G01	A	A		B	B		A	A		A	A
																						BBMR_15G02	A	A		A	A		A	A		A	A
																						CBBMR_15H01	A	A		B	B		A	A		A	A
																						BBMR_15H13	A	A		A	A		A	A		A	A
																						ABMR_15I13*	B	B		-	A		A	A		A	A
																						ABMR_15I16	B	B		B	B		A	A		B	B
																						ABMR_15I21	B	B		B	B		A	A		A	A
																						ABMR_15I22	A	A		B	B		A	A		A	A
																						ABMR_15I24	B	B		A	A		A	A		A	A
																						BBMR_15J16	A	A		A	A		A	A		A	A
																						CBBMR_15K01	B	B		B	B		A	A		B	B
																						BBMR_15K19	A	A		A	A		A	A		A	A
																						CBBMR_15L03	B	B		B	B		A	A		B	B
																						ABMR_15L04	B	B		B	B		A	A		B	B
																						BBMR_15L07	A	A		B	B		A	A		A	A
																						CBBMR_15L23	B	B		B	B		A	A		B	B
																						BBMR_15M02	A	A		B	B		A	A		A	A
																						BBMR_15N20	A	A		A	A		A	A		A	A
																						CBBMR_15O14	A	A		B	B		B	B		B	B
																						ABMR_15O18**	A	A		A	A		A	A		A	A
																						BBMR_15O21	A	A		B	B		A	A		A	A
																						BBMR_15P06	A	A		A	A		A	A		A	A
																						CBBMR_15P19	B	B		B	B		B	B		A	A
																						ABMR_16A17	A	A		B	B		A	A		A	A
																						BBMR_16A19	A	A		A	A		A	A		A	A
																						BBMR_16B02	A	A		B	B		A	A		A	A
																						CBBMR_16B03**	B	B		A	A		A	A		A	A
																						BBMR_16B08	A	A		A	A		A	A		A	A
																						CBBMR_16B15	A	A		B	B		A	A		A	-
																						CBBMR_16B20	A	A		B	B		A	A		A	A
																						ABMR_16C07	B	B		B	B		A	A		B	B
																						ABMR_16D05	A	A		B	B		B	B		A	A
																						ABMR_16D22	B	B		B	B		A	A		A	A
																						BBMR_16E06**	A	A		A	-		A	A		A	A
																						BBMR_16E15	B	B		B	B		A	A		B	B
																						BBMR_16E21	A	A		A	A		A	-		A	A
																						BBMR_16E23	-	A		A	-		A	A		A	A
																						ABMR_16F17	A	A		B	-		B	B		B	B
																						BBMR_16F24	B	B		B	B		A	A		A	A
																						ABMR_16G02*******	B	B		B	B		A	A		A	A
																						BBMR_16G12	A	A		A	A		A	A		A	A
																						BBMR_16G14	A	A		A	A		A	A		A	A
																						ABMR_16G16	A	A		B	B		A	A		A	A
																						BBMR_16H05	A	A		A	A		A	A		A	A
																						BBMR_16I05	A	A		B	-		A	A		A	A
																						BBMR_16I10	A	A		B	B		A	A		A	A
																						ABMR_16I14	B	B		B	B		A	A		A	A
																						BBMR_16J05	A	A		B	B		B	B		B	B
																						ABMR_16J20	B	B		B	B		A	A		B	B
																						ABMR_16K14*	A	A		A	A		A	A		A	A
																						CBBMR_16K24	A	A		B	B		A	A		B	B
																						BBMR_16L06	A	A		B	B		A	A		A	A
																						ABMR_16L11	A	A		A	A		B	B		B	B
																						CBBMR_16M02	B	B		B	B		A	A		B	B
																						BBMR_16M06	A	A		A	A		A	A		A	A
																						BBMR_16M23	B	B		A	A		A	A		B	B
																						CBBMR_16N02	B	B		B	B		A	A		B	B
																						BBMR_16N22**	B	B		B	B		A	A		B	B
																						BBMR_16O09	A	A		A	A		A	A		A	A
																						BBMR_16O24	A	A		A	A		A	A		A	A
																						BBMR_16P03	-	A		A	A		A	A		-	A
																						ABMR_16P17	B	B		B	B		A	A		B	B
																						CAHMR_06A08	A	A		A	A		A	A		A	A
																						AHMR_06A14	A	A		B	B		A	A		A	A
																						AHMR_06A16	A	A		B	B		A	A		A	A
																						CAHMR_06B02	B	B		B	B		A	A		A	A
																						AHMR_06C03	B	B		B	B		-	B		A	A
																						CAHMR_06D05	B	B		B	B		A	A		B	B
																						AHMR_06D23	B	B		B	B		A	A		A	A
																						AHMR_06E02	B	B		B	B		A	A		B	B
																						AHMR_06E08	A	A		B	B		B	B		B	B
																						AHMR_06F17	A	A		A	A		A	A		B	B
																						CAHMR_06G09	B	B		A	A		B	B		A	A
																						CAHMR_06G21	A	A		A	A		B	B		B	B
																						AHMR_06G22	A	A		B	B		A	A		A	A
																						CAHMR_06H07**	A	A		B	B		A	A		A	A
																						AHMR_06H22	B	-		B	-		A	A		B	B
																						AHMR_06I03	B	B		B	B		A	A		A	A
																						CAHMR_06I09	A	A		A	A		B	B		A	A
																						BHMR_06J05**	A	A		B	B		A	A		A	A
																						AHMR_06K02	A	A		B	B		B	B		B	B
																						AHMR_06K10	B	B		B	B		B	B		A	A
																						CAHMR_06K18	A	A		B	B		A	A		B	B
																						CAHMR_06K21	A	A		A	A		B	B		A	A
																						CAHMR_06L18	A	A		B	B		A	A		A	A
																						AHMR_06N06	B	B		B	B		A	A		A	A
																						AHMR_06N21	A	A		B	B		A	A		A	A
																						AHMR_06O02**	B	B		A	A		A	A		A	A
																						AHMR_06O06	B	B		-	B		A	A		B	B
																						AHMR_06O18	-	B		B	B		A	A		B	B
																						AHMR_06P20	A	A		B	B		A	A		A	A
																						AHMR_02A15	B	B		B	B		A	A		A	A
																						CAHMR_02A19	A	A		B	B		B	B		A	A
																						CAHMR_02C06	A	A		B	B		A	A		A	A
																						CAHMR_02D04	A	A		A	A		-	A		B	B
																						AHMR_02E05	B	B		-	-		A	A		A	A
																						AHMR_02E17	A	A		B	B		B	B		B	B
																						AHMR_02E23	A	A		B	B		A	A		A	A
																						AHMR_02F13	A	A		A	A		A	A		A	A
																						AHMR_02F14	A	A		A	A		B	B		A	A
																						AHMR_02F22	B	B		B	B		A	A		A	A
																						AHMR_02G16	B	B		B	B		A	A		B	B
																						CAHMR_02G20	B	B		B	B		A	A		B	B
																						CAHMR_02H17	B	B		A	A		A	A		A	A
																						AHMR_02I24	B	B		B	B		A	A		B	B
																						AHMR_02J07	A	A		A	A		A	A		A	A
																						CAHMR_02J16	A	A		A	A		A	A		A	A
																						AHMR_02K06	B	B		A	A		A	A		A	A
																						AHMR_02K09	A	A		A	A		A	A		B	B
																						CAHMR_02M02*	B	B		B	B		B	B		A	A
																						CAHMR_02N09	B	B		B	B		B	B		A	A
																						AHMR_02O01	B	B		B	B		-	A		B	B
																						AHMR_02O05	B	B		B	B		A	A		A	A
																						AHMR_02O19	A	A		B	B		A	A		A	A
																						CAHMR_02O22	A	A		B	B		A	A		A	A
																						CAHMR_02P01	B	B		B	B		A	A		A	A
																						AHMR_02P13	A	A		B	B		-	B		A	A
																						CAHMR_02P17	A	A		B	B		A	A		B	B
																						AHMR_02P24*	B	B		B	B		A	A		B	B
																						CAHMR_03A06	B	B		A	A		A	A		B	B
																						CAHMR_03A17**	B	B		A	A		B	B		B	B
																						CAHMR_03A23	B	B		B	B		A	A		A	A
																						CAHMR_03C06	B	B		A	A		A	A		A	A
																						AHMR_03D07	A	-		B	B		B	B		A	A
																						AHMR_03E01	B	B		A	A		B	B		B	B
																						AHMR_03E04	B	B		B	B		-	A		A	A
																						CAHMR_03E19	A	A		B	B		A	A		B	B
																						AHMR_03E24	A	A		A	A		A	A		B	B
																						CAHMR_03F08	A	A		B	B		B	B		B	B
																						CAHMR_03F10	A	A		A	A		A	A		-	A
																						AHMR_03G06	B	B		B	B		A	A		B	B
																						CAHMR_03H08	A	A		A	A		A	A		A	A
																						CAHMR_03H20	B	B		B	B		A	A		B	B
																						CAHMR_03H24	B	B		B	B		A	A		B	B
																						CAHMR_03I02	-	B		B	B		A	A		A	A
																						CAHMR_03I13	A	A		A	A		B	B		A	A
																						CAHMR_03J23	A	A		B	B		A	A		B	B
																						CAHMR_03K05**	A	A		B	B		A	A		A	A
																						CAHMR_03K09	A	A		A	A		B	B		A	A
																						AHMR_03K19	A	A		B	B		B	B		B	B
																						CAHMR_03L03	A	A		B	B		A	A		A	A
																						AHMR_03L15	B	B		B	B		A	A		A	A
																						AHMR_03L19	B	B		B	B		A	A		A	A
																						AHMR_03M15	A	A		B	B		A	A		A	A
																						AHMR_03M16	B	B		B	B		A	A		B	B
																						CAHMR_03M24	A	A		B	B		B	B		B	B
																						CAHMR_03N21*	A	A		B	B		A	A		A	A
																						CAHMR_03N24	B	B		B	B		B	B		B	B
																						CAHMR_03O04	A	A		A	A		B	B		A	A
																						AHMR_03O11	A	A		A	A		B	B		A	A
																						AHMR_03O14	B	B		A	A		B	B		A	A
																						CAHMR_03P06	B	B		B	B		A	A		B	B
																						CAHMR_03P24	A	A		B	B		A	A		B	B
																						AHMR_04A05	A	A		A	A		B	B		B	B
																						AHMR_04A16	A	A		B	B		B	B		B	B
																						AHMR_04B08	A	A		A	A		A	A		B	B
																						CAHMR_04B11	B	B		B	B		A	A		B	B
																						AHMR_04B14	B	B		B	B		A	A		A	A
																						AHMR_04C19	B	B		B	B		B	B		A	A
																						CAHMR_04C22	A	A		B	B		A	A		A	A
																						CAHMR_04D02	B	B		A	A		B	B		A	A
																						BHMR_04D05*	A	A		B	B		B	B		A	A
																						AHMR_04D09	A	A		B	B		B	B		A	A
																						CAHMR_04D20	A	A		A	A		B	B		A	A
																						AHMR_04E11	B	B		A	A		B	B		B	B
																						CAHMR_04E23	A	A		B	B		A	A		A	A
																						AHMR_04E24	A	A		B	B		B	B		B	B
																						CAHMR_04F07	B	B		A	A		A	A		A	A
																						CAHMR_04F10	B	B		B	B		A	A		B	B
																						AHMR_04F11	B	B		A	A		B	B		B	B
																						AHMR_04F20	A	A		B	-		A	A		A	A
																						AHMR_04G03	A	A		A	A		B	B		B	B
																						CAHMR_04G23	A	A		A	A		B	B		B	B
																						AHMR_04I01	B	B		B	B		B	B		A	A
																						CAHMR_04I09	A	A		A	A		A	A		A	A
																						CAHMR_04I10	B	B		A	A		B	B		B	B
																						CAHMR_04I12**	A	A		A	A		A	A		A	A
																						AHMR_04J02	B	B		A	A		-	B		A	A
																						CAHMR_04J17	A	A		A	A		A	A		A	A
																						AHMR_04J20	A	A		B	B		A	A		A	A
																						CAHMR_04L02	A	A		B	B		B	B		A	A
																						AHMR_04L03	B	B		B	B		A	A		B	B
																						AHMR_04L06	B	B		B	B		A	A		A	A
																						AHMR_04M08	A	-		B	B		B	B		B	B
																						CAHMR_04N24	B	B		A	A		A	A		A	A
																						AHMR_04P14	A	A		B	B		A	A		A	A
																						AHMR_05B09	B	B		B	B		-	B		A	A
																						CAHMR_05B20	A	A		B	B		A	A		A	A
																						AHMR_05C05	B	B		B	B		A	A		B	B
																						CAHMR_05C20	B	B		B	B		A	A		A	A
																						CAHMR_05D06	B	B		B	B		-	B		A	A
																						AHMR_05D18	A	A		B	B		B	B		A	A
																						AHMR_05D19	B	B		A	A		B	B		B	B
																						AHMR_05D22	B	B		B	B		A	A		B	B
																						CAHMR_05D24	B	B		A	A		B	B		B	B
																						CAHMR_05E03	B	B		A	A		B	B		B	B
																						CAHMR_05E06	B	B		B	B		A	A		A	A
																						CAHMR_05G10	B	B		B	B		A	A		B	B
																						CAHMR_05H16	A	A		B	B		A	A		A	A
																						AHMR_05H18	A	A		B	B		B	B		A	-
																						CAHMR_05I04	A	A		B	B		A	A		A	A
																						AHMR_05I19	A	A		A	A		B	B		A	A
																						AHMR_05I24	B	B		B	B		B	B		A	A
																						CAHMR_05K11	B	B		B	B		A	A		A	A
																						AHMR_05K15	A	A		B	B		A	A		A	A
																						AHMR_05L13	B	B		B	B		A	A		A	A
																						CAHMR_05M06	B	B		B	B		B	B		A	A
																						CAHMR_05M17	A	A		A	A		B	B		B	B
																						CAHMR_05N09**	A	A		A	A		A	A		A	A
																						AHMR_05N13	A	A		A	A		A	A		A	A
																						AHMR_05N15	B	B		A	A		B	B		A	A
																						CAHMR_05O12	A	A		A	A		B	B		A	A
																						AHMR_05O20	A	A		B	B		A	A		A	A
																						AHMR_05O24	A	A		A	A		A	A		A	A
																						AHMR_05P03	A	A		B	B		A	A		A	A
																						CAHMR_05P09	B	B		B	B		B	B		A	A
																						CAHMR_01A08	A	A		A	A		-	B		B	B
																						AHMR_01A16**	A	A		B	B		A	A		A	A
																						CAHMR_01A18	-	B		B	B		B	B		A	A
																						CAHMR_01C07	A	A		A	A		B	B		B	B
																						CAHMR_01C18	A	A		B	B		A	A		A	A
																						AHMR_01D24	A	A		A	A		B	B		A	A
																						AHMR_01E04	-	B		B	B		A	A		A	A
																						CAHMR_01F01	B	B		A	A		A	A		A	A
																						AHMR_01G04	A	A		A	A		A	A		B	B
																						CAHMR_01H06	A	A		B	B		-	B		B	B
																						AHMR_01H14	A	A		B	B		A	A		A	A
																						AHMR_01H24	B	B		A	A		A	A		A	A
																						AHMR_01I02	A	A		B	B		B	B		A	A
																						AHMR_01I04	A	A		B	B		A	A		A	A
																						AHMR_01I18	B	B		B	B		B	B		B	B
																						AHMR_01J05	A	A		B	B		A	A		B	B
																						AHMR_01J15	B	B		A	A		A	A		A	A
																						CAHMR_01K12	A	A		A	A		A	A		A	A
																						AHMR_01K16	A	A		A	A		A	A		A	A
																						AHMR_01K20	B	B		B	B		A	A		B	B
																						AHMR_01M23	A	A		B	B		B	B		B	B
																						CAHMR_01N01	A	A		B	B		A	A		A	A
																						AHMR_01N05	A	A		A	A		-	B		A	A
																						CAHMR_01N11	A	A		A	A		B	B		A	A
																						CAHMR_01N23	A	A		A	A		B	B		A	A
																						CAHMR_01O02	A	A		A	A		B	B		A	A
																						AHMR_01O08	B	B		B	B		A	A		B	B
																						AHMR_01O19	A	A		A	A		A	A		A	A
																						AHMR_07B04*	A	A		B	B		-	A		A	A
																						AHMR_07B11	A	A		B	B		A	A		A	A
																						CAHMR_07C05**	A	A		B	B		A	A		A	A
																						AHMR_07C18	B	B		B	B		A	A		A	A
																						AHMR_07D10	B	B		B	B		-	A		B	B
																						CAHMR_07D15	A	A		B	B		A	A		A	A
																						CAHMR_07D17	B	B		A	A		A	A		A	A
																						CAHMR_07E02	A	A		B	B		B	B		A	A
																						AHMR_07F08*******	A	A		B	B		A	A		A	A
																						CAHMR_07F21	B	B		A	A		B	B		A	A
																						CAHMR_07G08	B	B		A	A		B	B		B	B
																						CAHMR_07G23	A	A		B	B		B	B		A	A
																						AHMR_07H11	A	A		B	B		A	A		A	A
																						CAHMR_07H13	A	A		B	B		A	A		-	A
																						CAHMR_07H22	B	B		B	B		B	B		A	A
																						CAHMR_07I02	B	B		B	B		A	A		B	B
																						CAHMR_07I22	B	B		B	B		B	B		A	A
																						CAHMR_07J01	A	A		B	B		A	A		A	A
																						AHMR_07J12	B	B		B	-		-	B		A	A
																						CAHMR_07K01	B	B		B	B		A	A		A	A
																						AHMR_07K15	A	A		B	B		A	A		A	A
																						AHMR_07L07*	A	A		A	A		A	A		A	A
																						AHMR_07L14	B	B		A	A		A	A		A	A
																						CAHMR_07L16	B	B		B	B		A	A		B	B
																						AHMR_07L20	B	B		B	B		B	B		A	A
																						AHMR_07M10	A	A		B	B		A	A		A	A
																						CAHMR_07N06	A	A		A	A		A	A		B	B
																						AHMR_07N17	-	B		B	B		A	A		A	A
																						AHMR_07O03	A	A		B	B		B	B		B	B
																						AHMR_07O17*	A	A		B	B		A	A		A	A
																						AHMR_07O20	B	-		A	A		-	B		A	A
																						CAHMR_07P11	B	B		A	A		-	B		A	A
																						CAHMR_07P17	A	A		A	A		B	B		B	B
																						CAHMR_08A01	B	B		B	B		A	A		B	B
																						AHMR_08A06	A	A		A	A		A	A		A	A
																						CAHMR_08B05	B	B		B	B		-	A		B	B
																						CAHMR_08B17	B	B		B	B		B	B		A	A
																						AHMR_08B18	B	B		B	B		B	B		A	A
																						CAHMR_08B22	B	B		B	B		B	B		B	B
																						CAHMR_08C07*	A	A		A	A		A	A		A	A
																						AHMR_08C24	B	B		B	B		B	B		A	A
																						CAHMR_08D20	B	B		B	B		A	A		B	B
																						AHMR_08D22	A	A		B	B		-	A		A	A
																						AHMR_08D24	A	A		B	B		A	A		A	A
																						AHMR_08E01	B	B		B	B		A	A		A	A
																						CAHMR_08E12	A	A		A	A		A	A		A	A
																						AHMR_08E16	A	A		A	A		B	B		A	A
																						AHMR_08E23	B	B		A	A		A	A		B	B
																						CAHMR_08F16	A	A		B	B		A	A		A	A
																						AHMR_08G05	B	B		B	B		A	A		A	A
																						CAHMR_08G14	B	B		A	A		B	B		A	A
																						CAHMR_08H09	A	A		B	B		B	B		A	A
																						AHMR_08H17	A	A		B	B		A	A		A	A
																						CAHMR_08I06	A	A		B	B		B	B		A	A
																						CAHMR_08I14	A	A		A	A		B	B		A	A
																						AHMR_08J09	-	B		B	B		A	A		B	B
																						BHMR_08K20	-	A		B	B		B	B		B	B
																						AHMR_08K21	A	A		B	B		B	B		A	A
																						CAHMR_08L11*	A	A		A	A		A	A		A	A
																						CAHMR_08L13	A	A		B	B		B	B		A	A
																						CAHMR_08M22	A	A		A	A		B	B		A	A
																						CAHMR_08N04	B	B		B	B		A	A		B	B
																						AHMR_08N09	B	B		B	B		A	A		B	B
																						CAHMR_08O04	A	A		B	B		A	A		B	B
																						CAHMR_08O05	A	A		A	A		B	B		A	A
																						CAHMR_08O12	A	A		B	B		A	A		-	-
																						AHMR_08O13	B	B		A	A		B	B		B	B
																						AHMR_08O14	-	B		B	B		B	B		A	A
																						CAHMR_08O16	B	B		A	A		A	A		A	A
																						CAHMR_08O18	B	B		B	B		A	A		A	A
																						CHMR_09B06	B	B		B	B		A	A		A	A
																						AHMR_09B12	B	B		B	B		A	A		A	A
																						AHMR_09C02	A	A		B	B		A	A		A	A
																						BHMR_09C09	A	A		B	B		A	A		B	B
																						CHMR_09D04	B	B		B	B		A	A		A	A
																						CBHMR_09D13	A	A		B	B		B	B		B	B
																						CBHMR_09D14	B	B		A	A		A	A		A	A
																						AHMR_09E24	A	A		A	A		A	A		A	A
																						AHMR_09F03	B	B		-	B		A	A		A	A
																						AHMR_09F05	B	B		B	B		A	-		A	A
																						CBHMR_09F06	B	B		B	B		A	A		B	B
																						CBHMR_09F14*	A	A		A	A		A	A		A	A
																						AHMR_09F21	A	A		A	A		B	B		A	A
																						AHMR_09G13	B	B		A	A		B	B		A	A
																						CBHMR_09I05	B	B		A	A		A	A		A	A
																						AHMR_09J09	A	A		B	B		A	A		B	B
																						CBHMR_09J13	A	A		A	A		A	A		A	A
																						AHMR_09J16*	A	A		A	A		A	A		A	A
																						AHMR_09J19	A	A		B	B		A	A		A	A
																						AHMR_09J21	B	B		B	B		A	-		B	B
																						CHMR_09K21	B	B		A	A		A	A		B	B
																						AHMR_09L01	B	B		B	B		A	A		B	B
																						AHMR_09L16	A	A		B	B		B	B		B	B
																						CBHMR_09M03	A	A		B	B		B	B		A	A
																						CBHMR_09M13	B	B		A	A		A	A		B	B
																						AHMR_09M15**	A	A		B	B		A	A		A	A
																						CBHMR_10B06**	A	A		B	B		A	A		A	A
																						CBHMR_10B07	A	A		A	A		B	B		B	B
																						AHMR_10B10	B	B		B	B		A	A		A	A
																						AHMR_10C07	B	B		A	A		A	A		A	A
																						AHMR_10C13	A	A		B	B		B	B		A	A
																						AHMR_10D02	B	B		B	B		A	A		A	A
																						BHMR_10D06	A	A		A	A		B	B		A	A
																						CHMR_10D17	B	B		B	B		A	A		A	A
																						CBHMR_10E06	A	A		A	A		B	B		A	A
																						AHMR_10E11**	B	B		A	A		A	A		A	A
																						AHMR_10F19	A	A		B	B		A	A		B	B
																						BHMR_10G08***	B	B		B	B		A	-		B	B
																						CBHMR_10G18	B	B		A	A		A	A		B	B
																						CBHMR_10H11	B	B		B	B		A	A		B	B
																						CBHMR_10I02**	A	A		A	A		A	A		A	A
																						AHMR_10I07	B	B		B	B		A	A		B	B
																						BHMR_10I23	A	A		B	B		B	B		B	B
																						AHMR_10J02	B	B		B	B		A	A		A	A
																						CBHMR_10J13**	A	A		A	A		A	A		A	A
																						AHMR_10J22	A	A		B	B		B	B		A	A
																						BHMR_10K02	B	B		B	B		A	A		B	B
																						AHMR_10K08	A	A		A	A		-	B		A	A
																						AHMR_10L17	B	B		B	B		B	B		A	A
																						BHMR_10L23	A	A		B	B		A	A		A	A
																						AHMR_10M08	A	A		B	B		A	A		A	A
																						AHMR_10N20	B	B		B	B		A	A		A	A
																						AHMR_10O24*	A	A		A	A		A	A		A	A
																						CBHMR_10P03	A	A		B	B		B	B		B	B
																						AHMR_11A21	A	A		A	A		B	B		A	A
																						AHMR_11B18	B	B		B	B		B	B		A	A
																						AHMR_11C18	B	B		B	B		A	A		-	B
																						CBHMR_11E02	A	A		B	B		A	A		A	A
																						CBHMR_11E19	B	B		B	B		B	B		A	A
																						CBHMR_11E22	A	A		B	B		A	A		B	B
																						AHMR_11F08	A	A		B	B		A	A		A	A
																						AHMR_11F12	A	A		A	A		B	B		A	A
																						CBHMR_11F16	B	B		B	B		B	B		A	A
																						AHMR_11F21	B	B		B	B		A	A		B	B
																						AHMR_11G19	A	A		A	A		B	B		A	A
																						CBHMR_11H24	-	A		B	B		A	A		A	A
																						CBHMR_11I11	A	A		B	B		A	A		A	A
																						CBHMR_11I20	B	B		B	B		A	A		A	A
																						CBHMR_11I23****	B	B		B	B		A	A		A	A
																						BHMR_11J10	-	A		A	A		B	B		A	A
																						BHMR_11K07	B	B		A	A		A	A		B	B
																						AHMR_11L05	A	A		B	B		B	B		A	A
																						AHMR_11M02	A	A		A	A		B	B		A	A
																						AHMR_11N15	B	B		B	B		B	B		B	B
																						BHMR_11O04	A	A		A	A		A	A		A	A
																						AHMR_11P01*	A	A		A	A		A	A		B	B
																						AHMR_11P20	B	B		B	B		A	A		A	A
																						AHMR_12B02	A	A		B	B		B	B		A	A
																						CBHMR_12B09	B	B		A	A		A	A		B	B
																						AHMR_12B18	B	B		B	B		B	B		B	B
																						BHMR_12E11	A	A		B	B		B	B		B	B
																						CBHMR_12E16	B	B		B	B		A	A		B	B
																						AHMR_12F18	B	B		A	A		B	B		A	A
																						CHMR_12F23	A	A		A	A		A	A		B	B
																						AHMR_12F24	A	A		B	B		B	B		A	A
																						AHMR_12G11	-	B		B	B		A	A		B	B
																						AHMR_12G17	A	A		A	A		B	B		B	B
																						AHMR_12G20	B	-		A	A		B	B		A	A
																						AHMR_12H07	B	B		B	B		A	A		A	A
																						AHMR_12H08	-	B		B	B		A	A		B	B
																						CBHMR_12H11	B	B		B	B		B	B		B	B
																						BHMR_12J02	A	A		B	B		B	B		B	B
																						CHMR_12J15	B	B		B	B		A	A		A	A
																						AHMR_12K09	B	B		B	B		A	A		B	B
																						CBHMR_12K23*****	B	B		B	B		A	A		A	A
																						CBHMR_12L06	A	A		A	A		B	B		A	A
																						CHMR_12L22	A	A		B	B		A	A		A	A
																						BHMR_12M11	A	A		B	B		A	A		A	A
																						CBHMR_12M18	B	B		B	B		A	A		B	B
																						CBHMR_12O06	B	B		B	B		B	B		-	A
																						CBHMR_12O07	B	B		A	A		B	B		B	B
																						CBHMR_12O11	A	A		B	B		A	A		A	A
																						CBHMR_12P05	A	A		B	B		-	B		-	B
																						AHMR_12P10	A	A		B	B		A	A		A	A
																						CBHMR_12P18	B	B		B	B		B	B		A	A
																						AHMR_13A18	A	A		B	B		A	A		A	A
																						CBHMR_13C17	B	B		B	B		A	A		B	B
																						CBHMR_13C20	A	A		B	B		A	A		B	B
																						AHMR_13C23	B	B		B	B		B	B		A	A
																						CHMR_13D06	B	B		B	B		A	A		A	A
																						CBHMR_13D12	A	A		B	B		-	A		B	B
																						AHMR_13E17	A	A		B	B		A	A		A	A
																						BHMR_13F01	A	A		A	A		B	B		A	A
																						AHMR_13F07	B	B		B	B		A	A		B	B
																						CBHMR_13F09	B	B		B	B		A	A		A	A
																						CBHMR_13F13	A	A		B	B		B	B		B	B
																						AHMR_13F19	A	A		B	B		A	A		A	A
																						CBHMR_13G21*	A	A		B	B		-	A		B	B
																						BHMR_13H01	B	B		B	B		A	A		B	-
																						AHMR_13H11	A	A		B	B		A	A		A	A
																						AHMR_13I03	A	A		B	B		-	A		A	A
																						AHMR_13I15	B	B		B	B		A	A		A	A
																						AHMR_13I16	B	B		B	B		A	A		B	B
																						CBHMR_13J08	B	B		A	A		A	A		B	B
																						AHMR_13K02	B	B		B	B		A	A		B	B
																						CBHMR_13K14	A	A		B	B		B	B		A	A
																						AHMR_13L19	B	B		B	B		A	A		A	A
																						AHMR_13M03	B	B		B	B		A	A		A	A
																						CBHMR_13M05	B	B		B	B		A	A		B	B
																						CBHMR_13M12	A	A		B	B		-	A		A	A
																						AHMR_13M17	A	A		B	B		A	A		A	A
																						AHMR_13N03	A	A		B	B		A	A		A	A
																						CBHMR_13N15**	A	A		B	B		A	A		A	A
																						AHMR_13N16	B	B		B	B		A	A		B	B
																						AHMR_13O01	B	B		B	B		A	A		B	B
																						CHMR_13O04	B	B		B	B		A	A		A	-
																						CHMR_13O19**	A	A		A	A		A	A		B	B
																						AHMR_13P06***	B	B		B	B		B	B		B	B
																						CBHMR_13P11	A	-		B	B		B	B		B	B
																						AHMR_13P12	A	A		A	A		-	B		A	A
																						CBHMR_13P14	A	A		B	B		A	A		A	A
																						AHMR_13P19	A	A		A	A		A	A		A	A
																						CHMR_13P21	B	B		B	B		A	A		B	B
																						AHMR_14A15	A	A		B	B		B	B		A	A
																						BHMR_14C03	A	A		B	B		A	A		B	B
																						AHMR_14C13	B	B		B	B		A	A		B	B
																						CBHMR_14D22	A	-		B	B		A	A		A	A
																						AHMR_14E04	A	A		A	A		B	B		B	B
																						AHMR_14F04	A	A		B	B		B	B		A	A
																						AHMR_14F08	B	B		B	B		A	A		A	A
																						CBHMR_14F15	B	B		A	A		A	A		B	B
																						AHMR_14H12	B	B		A	A		A	A		B	B
																						AHMR_14H13**	A	A		B	B		A	A		A	A
																						CBHMR_14H18**	A	A		A	A		A	A		A	A
																						AHMR_14J04	B	B		B	B		B	B		A	A
																						AHMR_14K08	B	B		B	B		A	A		A	A
																						AHMR_14K16	A	A		B	B		A	A		A	A
																						AHMR_14L02	A	A		B	B		A	A		A	A
																						CHMR_14L04	B	B		B	B		A	A		B	B
																						CBHMR_14L10	B	B		A	A		B	B		B	B
																						AHMR_14L12*	A	A		A	A		A	A		A	A
																						AHMR_14L18	B	B		B	B		A	A		B	B
																						BHMR_14M01**	A	A		A	A		A	A		A	A
																						AHMR_14N02	A	A		B	B		B	B		B	B
																						CBHMR_14N06	A	A		A	A		A	A		A	A
																						CBHMR_14N08	A	A		B	B		A	A		B	B
																						CBHMR_14N21	B	B		B	B		A	A		A	A
																						AHMR_14N24	B	B		A	A		B	B		B	B
																						AHMR_14O11	A	A		B	B		A	A		A	A
																						AHMR_14P09	A	A		B	B		A	A		A	A
																						AHMR_14P20	B	B		B	B		B	B		A	A
																						CBHMR_15A14	B	B		B	B		A	A		A	A
																						AHMR_15A17	A	A		B	B		A	A		A	A
																						AHMR_15A20	B	B		B	B		A	A		A	A
																						AHMR_15C12	B	B		A	A		B	B		B	B
																						CBHMR_15D02	A	A		B	B		A	A		A	A
																						BHMR_15D22	-	A		B	B		A	A		A	A
																						CBHMR_15D24	A	A		A	A		A	A		A	A
																						AHMR_15E02	B	B		B	B		A	A		B	B
																						CBHMR_15F11	B	B		B	B		A	A		B	B
																						CBHMR_15G12	A	A		B	B		B	B		B	B
																						AHMR_15G14	B	B		B	B		A	A		A	A
																						AHMR_15G24	B	B		B	B		A	A		A	A
																						CBHMR_15H04	B	B		B	B		A	A		A	A
																						AHMR_15H06	A	A		A	A		B	B		A	A
																						AHMR_15H19	B	B		B	B		-	A		A	A
																						AHMR_15I02	B	B		B	B		A	A		A	A
																						AHMR_15J09	B	-		A	A		B	B		-	B
																						AHMR_15J24	B	B		B	B		A	A		B	B
																						AHMR_15K01	B	B		B	B		A	A		A	A
																						CBHMR_15K10	B	B		B	B		A	A		-	B
																						AHMR_15K21	B	B		B	B		A	A		A	A
																						CBHMR_15L18	A	A		B	B		A	A		A	A
																						AHMR_15L21	B	B		B	B		A	A		A	A
																						AHMR_15N06	B	B		B	B		A	A		A	A
																						CBHMR_15N16	A	A		B	B		A	A		A	A
																						BHMR_15N17	A	A		B	B		A	A		B	B
																						AHMR_15N19	A	A		B	B		-	-		A	A
																						BHMR_15O10	A	A		B	B		B	B		B	B
																						AHMR_15O23	A	A		B	B		B	B		B	B
																						AHMR_16B05	A	A		A	A		A	A		B	B
																						CBHMR_16D01	B	B		A	A		A	A		A	A
																						CBHMR_16D21*	A	A		B	B		A	A		A	A
																						CBHMR_16E04	A	A		B	B		B	B		A	A
																						AHMR_16E11	A	A		A	A		A	A		A	A
																						AHMR_16E22	A	A		A	A		B	B		A	A
																						AHMR_16F08	B	B		A	A		B	B		A	A
																						CBHMR_16F17	B	B		B	B		A	A		B	B
																						AHMR_16F19	B	B		A	A		A	A		B	B
																						AHMR_16G02	A	A		B	B		B	B		A	A
																						AHMR_16G04	B	B		B	B		A	A		A	A
																						CBHMR_16G06	A	A		B	B		A	A		A	A
																						BHMR_16H01	A	A		B	B		A	A		A	A
																						CBHMR_16H17	A	A		B	B		B	B		A	A
																						AHMR_16H20*	A	A		A	A		A	A		B	B
																						AHMR_16I22	A	A		B	B		A	A		B	B
																						AHMR_16K20	B	B		B	B		B	B		A	A
																						CBHMR_16K21	A	A		B	B		A	A		A	A
																						BHMR_16L07	A	A		B	B		A	A		A	A
																						CBHMR_16L14*	A	A		B	B		A	A		A	A
																						AHMR_16M15	B	B		B	B		A	A		A	A
																						CBHMR_16M17	B	B		A	A		B	B		B	B
																						AHMR_16N06	A	A		A	A		A	A		B	B
																						AHMR_16N07	A	A		A	A		A	A		B	B
																						CBHMR_16N16	A	A		B	B		B	B		A	A
																						AHMR_16N21	A	A		B	B		A	A		B	B
																						AHMR_16O04	-	B		B	B		A	A		A	A
																						AHMR_16O10	B	B		B	B		A	A		B	B
																						CBHMR_16O12	A	A		B	B		A	A		A	A
																						CBHMR_16P06	B	B		A	A		A	A		A	A
																						AHMR_16P15**	A	A		A	A		A	A		A	A
																						CBHMR_16P23	A	A		B	B		A	A		B	B

## Sheet: Cross IPO323 x IPO95052
IPO323 x IPO95052	Isolates:	1104	1107	1108	1110	1111	1114	1116	1117	1118	1120	1121	1122	1123	1124	1125	1127	1128	1129	1131	1136	1137	1138	1139	1141	1144	1146	1147	1148	1149	1150	1151	1152	1155	1157	1158	1159	1160	1163	1164	1165	1166	1167	1168	1169	1170	1171	1172	1173
Loci	cM
group 1
BBMR_15L11	0	a	b	b	a	b	b	b	b	a	b	b	b	b	b	b	a	b	a	b	a	a	a	b	a	a	b	a	b	b	a	b	a	a	a	a	b	b	a	a	b	a	-	b	b	a	a	a	a
ABMR_01P10	14.499	a	b	a	a	b	b	a	b	a	b	b	a	b	b	b	b	b	a	b	a	a	a	b	b	a	b	a	b	a	a	b	a	a	a	a	b	b	a	a	a	a	b	b	b	a	a	a	a
CABMR_03J15	14.499	a	b	a	a	b	b	a	b	a	b	b	a	b	b	b	b	b	a	b	a	a	a	b	b	a	b	a	b	a	a	b	a	a	a	a	b	b	a	a	a	a	b	b	b	a	a	a	a
BBMR_09G19	14.499	a	b	a	a	b	b	a	b	a	b	b	a	b	b	b	b	b	a	b	a	a	a	b	b	a	b	a	b	a	a	b	a	a	a	a	b	b	a	a	a	a	b	b	b	a	a	a	a
BHMR_13G13	14.499	a	b	a	a	b	b	a	b	a	b	b	a	b	b	b	b	b	a	b	a	a	a	b	b	a	b	a	b	a	a	b	a	a	a	a	b	b	a	a	a	a	b	b	b	a	a	a	a
ABMR_07C11	14.499	a	b	a	a	b	b	a	b	a	b	b	a	b	b	b	-	b	a	b	a	a	a	b	b	a	b	a	b	a	a	b	a	a	a	a	b	b	a	a	a	a	b	b	b	a	a	a	a
ABMR_08P09	14.499	a	b	a	a	b	b	a	b	a	b	b	a	b	b	b	b	b	a	b	a	a	a	b	b	a	b	a	b	a	a	b	a	a	a	a	b	b	a	a	a	a	b	b	b	a	a	a	a
BBMR_15D11	14.499	a	b	a	a	b	b	a	b	a	b	b	a	b	b	b	b	b	a	b	a	a	a	b	b	a	b	a	b	a	a	b	a	a	a	a	b	b	a	a	a	a	b	b	b	a	a	a	a
BHMR_12A20	14.499	a	b	a	a	b	b	a	b	a	b	b	a	b	b	b	b	b	a	b	a	a	a	b	b	a	b	a	b	a	a	b	a	a	a	a	b	b	a	a	a	a	b	b	b	a	a	a	a
AHMR_04O20	14.499	a	b	a	a	b	b	a	b	a	b	b	a	b	b	b	-	b	a	b	a	a	a	b	b	a	b	a	b	a	a	b	a	a	a	a	b	-	a	a	a	a	b	b	b	a	a	a	a
AHMR_03G13	15.712	a	b	a	a	b	b	a	b	a	b	b	a	b	b	a	b	b	a	a	a	a	a	b	b	a	b	a	b	a	b	b	a	a	a	a	b	b	a	a	a	a	b	b	b	a	a	a	a
AHMR_06P03	15.712	a	b	a	a	b	b	a	b	a	b	b	a	b	b	a	b	b	a	a	a	a	a	b	b	a	b	a	b	a	b	b	a	a	a	a	b	b	a	a	a	a	b	b	b	a	a	a	a
BBMR_14F24	18.568	a	a	a	a	b	b	a	b	a	b	b	a	b	b	a	b	b	a	b	a	a	a	b	b	a	b	a	b	a	b	b	a	a	a	a	b	b	a	a	a	-	b	b	b	a	a	a	a
BHMR_11N20	18.568	a	a	a	a	b	b	a	b	a	b	b	a	b	b	a	b	b	a	b	a	a	a	-	b	a	b	a	b	a	b	b	a	a	a	a	b	b	a	a	a	b	b	b	b	a	a	a	a
BHMR_11O20	18.568	a	a	a	a	b	b	a	b	a	b	b	a	-	b	a	b	b	a	b	a	a	a	b	b	a	b	a	b	a	-	b	a	a	a	a	b	b	-	a	a	b	b	b	b	a	a	a	a
CABMR_04O23	24.168	a	a	a	a	b	b	a	b	a	b	a	a	b	b	a	b	b	a	b	a	a	a	b	b	a	a	a	-	a	b	b	a	a	a	a	b	b	b	a	a	b	b	b	b	a	a	a	b
BHMR_11H17	24.415	a	a	a	a	b	-	a	b	a	b	a	a	b	b	a	b	b	a	b	a	a	a	b	b	a	a	a	b	a	b	b	a	a	a	a	b	b	b	a	a	b	b	b	b	a	a	a	b
CABMR_06J10	26.84	b	a	a	a	b	b	a	b	a	b	a	a	b	b	a	b	a	a	b	a	a	a	b	b	a	a	a	b	a	b	b	a	a	a	a	b	b	b	a	a	b	b	b	b	a	a	a	b
CABMR_07K23	27.608	b	a	a	a	b	b	a	b	a	b	a	a	b	b	a	b	a	a	b	a	a	a	b	b	a	a	a	b	a	b	b	a	a	a	a	b	b	b	a	a	b	b	b	b	a	a	a	b
CBBMR_10B09	27.608	b	a	a	a	b	b	a	b	a	b	a	a	b	b	a	b	a	a	b	a	a	a	b	b	a	a	a	b	a	b	b	a	a	a	a	b	b	b	a	a	b	b	b	b	a	a	a	b
CBBMR_10K06	27.608	b	a	a	a	b	b	a	b	a	b	a	a	b	b	a	b	a	a	b	a	a	a	b	b	a	a	a	b	a	b	b	a	a	a	a	b	b	b	a	a	b	b	b	b	-	a	a	b
CAHMR_02C06	28.379	b	a	a	a	b	b	a	b	b	b	a	a	b	b	a	b	a	a	b	a	a	a	b	b	a	a	a	b	a	b	b	a	a	a	a	b	b	b	a	a	b	b	b	b	a	a	a	b
CBBMR_11I13	28.379	b	a	a	a	b	b	a	b	b	b	a	a	b	b	a	b	a	a	b	a	a	a	b	b	a	a	a	b	a	b	b	a	a	a	a	b	b	b	a	a	b	b	b	b	a	a	a	b
ABMR_07M22	31.667	b	a	a	a	b	b	a	b	b	b	a	a	b	b	a	b	a	a	b	a	a	a	b	b	a	a	a	b	a	b	b	a	a	a	a	b	b	b	a	a	b	b	b	b	a	a	a	b
BBMR_10C11	31.667	b	a	a	a	b	b	a	b	b	b	a	a	b	b	a	b	a	a	b	a	a	a	b	b	a	a	a	b	a	b	b	a	a	-	a	b	b	b	a	a	b	b	b	b	-	a	a	b
BBMR_13P18	36.463	b	a	a	a	b	b	a	b	b	b	a	a	b	b	a	b	a	a	b	a	a	a	b	b	a	a	a	b	a	b	b	a	a	a	a	b	b	b	a	a	b	b	b	b	a	a	a	b
BBMR_16A08	36.463	b	a	a	a	b	b	a	b	b	b	a	a	b	b	a	b	a	a	b	a	a	a	b	b	a	a	a	b	a	b	b	a	a	a	a	b	b	b	a	a	b	b	b	b	a	a	a	b
CABMR_06D24*	36.463	b	a	a	a	b	b	a	b	b	b	a	a	b	b	a	b	a	a	b	a	a	a	b	b	a	a	a	b	a	b	b	a	a	a	a	b	b	b	a	a	b	b	b	b	a	a	a	b
AHMR_06I21*	36.463	b	a	a	a	b	b	a	b	b	b	a	a	b	b	a	b	a	a	b	a	a	a	b	b	a	a	a	b	a	b	b	a	a	a	a	b	b	b	a	a	b	b	b	b	a	a	a	b
AHMR_06K03**	36.463	b	a	a	a	b	b	a	b	b	b	a	a	-	-	a	b	a	a	b	a	a	a	-	b	a	a	a	b	a	b	b	a	a	a	a	b	b	b	a	a	b	-	b	b	a	a	a	b
BBMR_11K20	36.463	b	a	a	a	b	b	a	b	b	b	a	a	b	b	a	b	a	a	b	a	a	a	b	b	a	a	a	b	a	b	b	a	a	-	a	b	b	b	a	a	b	b	b	b	-	a	a	b
BHMR_09D23	37.825	b	a	a	a	b	b	a	b	b	b	a	a	b	b	a	b	a	a	b	a	a	a	b	b	a	a	a	b	a	b	b	a	a	a	a	b	b	b	a	a	b	b	b	b	a	a	a	b
BBMR_10A13	37.825	b	a	a	-	b	b	a	b	b	b	a	a	b	b	a	b	a	a	b	a	a	a	b	b	a	a	a	b	a	b	b	a	a	a	a	b	b	b	a	a	b	b	b	b	a	a	a	b
CBHMR_12O11	37.825	b	a	a	a	b	b	a	b	b	b	a	a	b	b	a	b	a	-	b	a	a	a	b	b	a	a	a	b	a	b	b	a	a	a	a	b	b	b	a	a	b	b	b	b	a	a	a	b
BBMR_13F06	37.825	b	a	a	a	b	b	a	b	b	b	a	a	b	b	a	b	a	a	b	a	a	a	b	b	a	a	a	b	a	b	b	a	a	-	a	b	b	b	a	a	b	b	b	b	a	a	a	b
AHMR_05I05	38.619	b	a	a	a	b	b	a	b	b	b	a	a	b	b	a	b	a	a	b	a	a	a	b	b	a	a	a	b	a	b	b	a	a	a	a	b	b	b	a	a	b	b	b	b	a	a	a	b
AHMR_08C17	38.619	b	a	a	a	b	b	a	b	b	b	a	a	b	b	a	b	a	a	b	a	a	a	b	b	a	a	a	b	a	b	b	a	a	a	a	b	b	b	a	a	b	b	b	b	a	a	a	b
ABMR_06N08	38.619	b	a	a	a	b	b	a	b	b	b	a	a	b	b	a	b	a	a	b	a	a	a	b	b	a	a	a	b	a	b	b	a	a	a	a	b	b	b	a	a	b	b	b	b	a	a	a	b
BHMR_14E17*	38.619	b	a	a	a	b	b	a	b	b	b	a	a	b	b	a	b	a	a	b	a	a	a	b	b	a	a	a	b	a	b	b	a	a	a	a	b	b	b	a	a	b	b	b	-	a	a	a	b
CABMR_07P12	39.158	b	a	a	a	b	b	a	b	b	b	a	a	b	b	a	b	a	a	b	a	a	a	b	b	a	a	a	b	a	b	b	a	a	a	a	b	b	b	a	a	b	b	b	b	a	a	a	b
AHMR_03L16	39.158	b	a	a	a	b	b	a	b	b	b	a	a	b	b	a	b	a	a	b	a	a	a	b	b	a	a	a	b	a	b	b	a	a	a	a	b	b	b	a	a	b	b	b	b	a	a	a	b
CAHMR_05H16	39.158	b	a	a	a	b	-	a	b	b	b	a	a	b	b	a	b	a	a	b	a	a	a	b	b	a	a	a	b	a	b	b	a	a	a	a	b	b	b	a	a	b	b	b	b	a	a	a	b
CAHMR_05I04	39.925	b	a	a	a	b	b	a	b	b	b	a	a	b	b	a	b	a	a	b	a	a	a	b	b	a	a	a	b	a	b	a	a	a	a	a	b	b	b	a	a	b	b	b	b	a	a	a	b
BHMR_13P02	39.925	b	a	a	a	b	b	a	b	b	b	a	a	b	b	a	b	a	a	b	a	a	a	b	b	a	a	a	b	a	b	a	a	a	a	a	b	b	b	a	a	b	b	b	b	a	a	a	b
CBHMR_14D22	39.925	b	a	a	a	b	b	a	b	b	b	a	a	b	b	a	b	a	a	b	a	a	a	b	b	a	a	a	b	a	b	a	a	a	a	a	b	b	b	a	a	b	b	b	b	a	a	a	b
BBMR_09G09	42.185	b	a	a	a	b	b	a	b	b	b	a	a	b	b	a	b	a	a	b	a	a	a	b	b	a	a	a	b	a	b	a	a	a	a	a	b	b	a	b	a	b	b	b	b	a	a	a	b
CBBMR_13O22	42.185	b	a	a	a	b	b	a	b	b	b	a	a	b	b	a	b	a	a	b	a	a	a	b	b	a	a	a	b	a	b	a	a	a	a	a	b	b	a	b	a	b	b	b	b	a	a	a	b
BHMR_16N01	42.185	b	a	a	a	b	b	a	b	b	b	a	a	b	b	a	b	a	a	b	a	a	a	b	b	a	a	a	b	a	b	a	a	a	a	a	b	b	a	b	a	b	b	b	b	a	a	a	b
CABMR_04E23	42.707	b	a	a	a	b	b	a	b	b	b	a	a	b	b	a	b	a	a	b	a	a	a	b	b	a	a	a	b	a	b	a	a	a	a	a	b	b	a	b	a	b	b	b	b	a	a	b	b
CBHMR_16D21	42.707	b	a	a	a	b	b	a	b	b	b	a	a	b	b	a	b	a	a	b	a	a	a	b	b	a	a	a	b	a	b	a	a	a	a	a	b	b	a	b	a	b	b	b	b	a	a	b	b
CBHMR_15N16	42.707	b	a	a	a	b	b	a	b	b	b	a	a	b	b	a	b	a	a	b	a	a	a	b	b	a	a	-	b	a	b	a	a	a	a	a	b	b	a	b	a	b	b	b	b	a	a	b	b
BHMR_10N14	44.865	b	a	a	a	b	b	a	b	b	b	a	a	b	b	a	b	a	a	b	a	a	a	b	b	a	a	a	b	a	b	a	a	a	a	a	b	b	a	b	a	b	b	b	b	a	a	b	b
BBMR_10K12	46.413	b	a	a	a	b	b	a	b	b	b	a	a	b	b	a	b	a	a	b	a	a	a	b	b	a	a	a	b	a	b	a	a	a	a	a	b	b	a	b	a	b	b	b	b	a	a	b	b
BHMR_15F24	47.533	b	a	a	a	b	b	a	b	b	b	a	a	b	b	a	b	a	a	b	a	a	a	b	b	a	a	a	b	a	b	a	a	a	a	a	b	b	a	b	a	b	b	b	b	a	a	a	b
BHMR_15E24	47.533	b	a	a	a	b	b	a	b	b	b	a	a	b	b	a	b	a	a	b	a	a	a	b	b	a	a	a	b	a	b	a	a	a	a	a	b	b	a	b	a	b	b	b	b	a	a	a	b
CAHMR_06L18*	47.533	-	a	a	a	b	b	a	b	b	b	a	a	b	b	a	-	a	a	b	a	a	a	b	b	a	a	a	b	a	b	a	a	a	a	a	b	b	a	b	a	b	b	b	b	a	a	a	b
AHMR_05K03	47.533	b	a	a	a	b	-	a	b	b	b	a	a	b	b	a	b	a	a	b	a	a	a	b	b	a	a	a	b	a	b	a	a	a	a	a	b	b	a	b	a	b	b	b	b	-	-	a	b
CABMR_08B19	48.942	b	a	a	a	b	b	a	b	b	b	a	a	b	b	a	b	a	a	b	a	a	a	b	b	a	a	a	b	a	b	a	a	a	a	a	b	b	a	b	a	b	b	b	b	a	a	a	b
CBHMR_11I11	48.942	b	a	a	a	b	b	a	b	b	b	a	a	b	b	a	b	a	a	b	a	a	a	b	b	a	a	a	b	a	b	a	a	a	a	a	b	b	a	b	a	b	b	b	b	a	a	a	b
CBHMR_16G06	48.942	b	a	a	a	b	b	a	b	b	b	a	a	b	b	a	b	a	a	b	a	a	a	b	b	a	a	a	b	a	b	a	a	a	a	a	b	b	a	b	a	b	b	b	b	a	a	a	b
CBHMR_16O12	48.942	b	a	a	a	b	b	a	b	b	b	a	a	b	b	a	b	a	a	b	a	a	a	b	b	a	a	a	b	a	b	a	a	a	a	a	b	b	a	b	a	b	b	b	b	a	a	a	b
BBMR_16A03	48.942	b	a	a	a	b	b	a	b	b	b	a	a	b	b	a	b	a	a	b	a	a	a	b	b	a	a	a	b	a	b	a	a	a	a	a	b	b	a	b	a	b	b	b	b	a	a	a	b
BBMR_12F02*	48.942	b	a	a	a	b	b	a	b	b	b	a	a	-	b	a	b	a	a	b	a	a	a	b	b	a	a	a	b	a	b	a	a	a	a	a	b	b	a	b	a	b	b	-	b	-	a	a	b
CABMR_08E02*	54.736	b	a	a	a	b	b	a	b	b	b	a	a	b	b	a	b	b	a	b	a	a	a	a	b	b	a	a	b	a	a	a	a	a	a	a	b	b	a	b	a	b	b	b	b	a	a	a	b
AHMR_04C23*	54.736	b	a	a	a	b	b	a	b	b	b	a	a	b	b	a	b	b	a	b	a	a	a	a	b	b	a	a	b	a	a	a	a	a	a	a	b	b	a	b	a	b	b	b	b	a	a	a	b
CABMR_03O06*	54.736	b	a	a	a	b	b	a	b	b	b	a	a	-	b	a	b	b	a	b	a	a	a	a	b	b	a	a	b	a	a	a	a	a	a	a	b	b	a	b	a	b	b	b	b	a	a	a	b
CABMR_03A14**	54.736	b	a	a	a	b	b	a	b	b	b	a	a	-	b	a	b	b	a	b	a	a	a	a	b	b	a	a	b	a	a	a	a	a	a	a	-	b	a	b	a	b	b	b	b	a	a	a	-
CAHMR_01C18	56.846	b	a	a	a	-	b	b	b	b	b	a	a	b	b	a	b	b	a	b	a	a	a	a	b	b	a	a	b	a	a	a	a	a	a	a	b	b	a	b	a	b	b	b	b	a	a	a	b
CABMR_04P23	64.48	b	b	a	a	b	b	b	b	b	b	a	a	a	b	b	b	b	b	b	a	a	a	a	b	b	a	a	b	a	a	a	a	a	a	a	b	b	a	b	a	b	b	b	b	a	a	a	b
BBMR_14C20	64.48	b	b	a	a	b	b	b	b	b	b	a	a	a	b	b	b	b	b	b	a	a	a	a	b	b	a	a	b	a	a	a	a	a	a	a	b	b	a	b	a	b	b	b	b	a	a	a	b
AHMR_06C24	64.48	b	b	a	a	b	b	b	b	b	b	a	a	a	b	b	b	b	b	b	a	a	a	a	b	b	a	a	b	a	a	a	a	a	a	a	b	b	a	b	a	b	b	b	b	a	a	a	b
CABMR_07H13	65.85	b	b	a	a	b	b	b	b	b	b	a	a	a	b	b	b	b	b	b	a	a	a	a	b	b	a	a	b	a	a	a	a	a	a	a	b	b	a	b	a	b	b	b	b	a	a	a	b
CAHMR_04C22	65.85	b	b	a	a	b	b	b	b	b	b	a	a	a	b	b	b	b	b	b	a	a	a	a	b	b	a	a	b	a	a	a	a	a	a	a	b	b	a	b	a	b	b	b	b	a	a	a	b
CBMR_15A02	65.85	b	b	a	a	b	b	b	b	b	b	a	a	a	b	b	b	b	b	b	a	a	a	a	b	b	a	a	b	a	a	a	a	a	a	a	b	b	a	b	a	b	b	b	b	a	a	a	b
BBMR_11C03	65.85	b	b	a	-	b	b	b	b	b	b	a	a	a	b	b	b	b	b	b	a	a	a	a	b	b	a	a	b	a	a	a	a	a	a	a	b	b	a	b	a	b	b	b	b	a	a	a	b
CHMR_12L22	65.85	b	b	a	a	b	b	b	b	b	b	a	a	a	b	b	b	b	b	b	a	a	a	a	b	b	a	a	b	a	a	a	a	a	a	a	b	b	a	b	a	b	b	-	b	a	a	a	b
BBMR_10C22	67.421	b	b	a	a	b	b	b	b	b	b	a	a	a	b	b	b	b	b	b	a	a	a	a	b	b	a	a	b	a	a	a	a	a	a	a	b	b	a	b	a	b	b	b	b	a	a	a	b
BHMR_09O16	67.421	b	b	a	a	b	b	b	b	b	b	a	a	a	b	b	b	b	b	b	a	a	a	a	b	b	a	a	b	a	a	a	a	a	a	a	b	b	a	b	a	b	b	b	b	a	a	a	b
BHMR_15F07	67.421	b	b	a	a	b	b	b	b	b	b	a	a	a	b	b	b	b	b	b	a	a	a	a	b	b	a	a	b	a	a	a	a	a	a	a	b	b	a	b	a	b	b	b	b	a	a	a	b
BHMR_11J20	67.807	b	b	a	-	b	b	-	b	b	-	a	a	a	b	b	b	b	b	b	a	a	a	-	b	b	a	a	b	a	a	a	a	a	a	a	b	b	a	b	a	b	b	b	b	a	a	a	b
CABMR_03P12	69.596	b	b	a	a	b	a	b	b	b	b	a	a	a	b	b	b	b	b	b	a	a	a	a	b	b	a	a	b	a	a	a	a	a	a	b	b	b	a	b	a	b	b	b	b	a	a	a	b
CAHMR_08O12	76.009	b	b	a	a	b	a	b	b	b	b	a	a	a	b	b	a	b	b	b	a	a	a	a	b	b	a	a	b	b	a	a	a	a	a	b	b	b	a	b	a	b	-	a	a	b	a	b	b
BHMR_13E11	76.009	b	b	a	a	-	a	b	b	b	b	a	a	a	b	b	a	b	b	b	a	a	a	a	b	b	a	a	b	b	a	a	a	a	a	b	b	b	a	b	a	b	b	a	a	b	a	b	b
ABMR_01J17	112.645	a	b	b	a	a	a	b	b	a	b	a	b	a	b	b	a	b	b	b	a	b	a	a	b	b	a	a	b	b	a	a	b	b	b	b	a	b	a	b	b	b	a	a	a	b	a	b	b
CABMR_07D07	112.645	a	b	b	a	a	a	b	b	a	b	a	b	a	b	b	a	b	b	b	a	b	a	a	b	b	a	a	b	b	a	a	b	b	b	b	a	b	a	b	b	b	a	a	a	b	a	b	b
group 2
CBBMR_10K04	0	a	b	a	b	a	b	a	b	b	b	b	a	a	b	a	a	b	b	b	a	a	b	a	b	b	a	a	a	b	a	b	a	-	a	b	a	b	a	a	b	b	a	a	a	b	a	b	a
CBHMR_09F06	2.477	a	b	a	b	a	b	a	b	b	b	b	a	a	a	a	a	b	b	b	a	a	b	a	b	b	a	a	a	b	a	b	a	a	a	b	a	b	a	a	b	a	a	a	a	b	a	b	a
BHMR_15N20**	24.718	a	b	a	b	b	b	a	b	b	b	b	a	a	a	a	a	a	a	b	a	b	a	a	b	a	a	a	a	b	a	b	b	a	a	a	a	a	a	b	a	a	b	a	a	b	a	b	a
AHMR_05J22	31.614	a	b	a	b	b	a	b	b	b	b	b	a	a	a	a	a	a	a	b	b	b	a	a	b	a	a	a	a	b	a	b	b	b	a	a	a	a	a	b	a	a	b	a	a	b	a	b	a
CBHMR_14L10*	44.023	a	b	a	b	b	a	b	a	b	b	b	b	a	a	a	b	a	a	b	b	a	b	a	b	a	a	b	a	a	a	b	b	b	a	a	a	a	a	b	a	a	b	a	a	b	a	a	b
BBMR_10F05	45.389	a	b	a	b	b	a	b	a	b	b	b	b	a	a	a	b	a	a	b	b	a	b	a	b	a	a	b	a	a	a	b	b	b	-	a	a	a	a	b	a	a	b	a	a	b	a	a	b
BHMR_12I14	46.164	a	b	a	b	b	a	b	a	b	b	b	b	a	a	a	b	a	a	b	b	a	b	a	b	a	a	b	a	a	b	b	b	b	a	a	a	a	a	b	a	a	b	a	a	b	a	a	b
BHMR_16K01	46.164	a	b	a	b	b	a	b	a	b	b	b	b	a	a	a	b	a	a	b	b	a	b	a	b	a	-	b	a	a	b	b	b	b	a	a	a	a	-	b	a	a	b	a	-	b	a	a	b
ABMR_07G01	53.684	a	b	a	b	b	a	b	a	b	b	b	b	a	a	b	b	a	a	b	b	a	b	a	b	a	a	b	a	a	b	b	b	b	a	a	a	a	a	b	a	a	b	a	b	b	a	a	b
ABMR_06N24	53.684	a	b	a	b	b	a	b	a	b	b	b	b	a	a	b	b	a	a	b	b	a	b	a	b	a	a	b	a	a	b	b	b	b	a	a	a	a	a	b	a	a	b	a	b	b	a	a	b
AHMR_01J17	55.382	a	b	a	b	b	a	b	a	b	b	b	b	a	a	b	b	a	a	b	b	a	b	b	b	a	a	b	a	a	b	b	b	b	a	a	a	a	a	b	a	a	b	a	b	b	a	a	b
BHMR_09P06	55.382	a	b	a	b	b	a	b	a	b	b	b	b	a	a	b	b	a	a	b	b	a	b	b	b	a	a	b	a	a	b	b	b	b	a	a	a	a	a	b	a	a	b	a	b	b	a	a	b
ABMR_08D20	60.469	a	b	a	b	b	a	b	a	b	b	b	b	b	b	b	b	a	a	b	b	a	b	b	b	a	a	b	a	a	b	b	b	b	a	a	a	a	a	b	a	a	b	a	b	b	a	a	b
BHMR_10C02	61.17	a	b	a	b	b	a	b	a	b	b	b	b	b	b	b	b	a	a	b	b	a	b	b	b	a	a	b	a	a	b	b	b	b	a	a	a	a	a	b	a	a	b	a	b	b	a	a	b
BHMR_10N23	61.17	a	b	a	b	b	a	b	a	b	b	b	b	b	b	b	b	a	a	b	b	a	b	b	b	a	a	b	a	a	b	b	b	b	a	a	a	a	a	b	a	a	b	a	b	b	a	a	b
BHMR_12L04	61.17	a	b	a	b	b	-	b	a	b	b	b	b	b	b	b	b	a	a	b	b	a	b	b	b	a	a	b	a	a	b	b	b	b	a	a	a	a	a	b	a	a	b	a	b	b	a	a	b
ABMR_06E03	63.516	a	b	b	a	b	a	b	a	b	b	b	b	b	b	b	b	a	a	a	b	a	b	b	b	a	a	b	a	a	b	b	b	b	a	a	a	a	a	b	a	a	b	a	b	b	a	a	b
BHMR_14L11	63.516	a	b	b	a	b	a	b	a	b	b	b	b	b	b	b	b	a	a	a	b	a	b	b	b	a	a	b	a	a	b	b	b	b	a	a	a	a	a	b	a	a	b	a	b	b	a	a	b
CBHMR_12O07	63.516	a	b	b	a	b	a	b	a	b	b	b	b	b	b	b	b	a	a	a	b	a	b	b	b	a	a	b	a	a	-	b	b	b	a	a	a	a	a	b	a	a	b	a	b	b	a	a	b
CBHMR_16M17	66.877	a	b	b	a	a	a	b	a	b	b	b	b	b	b	b	b	a	a	a	b	a	b	b	b	a	a	b	a	a	b	b	b	b	a	a	a	a	a	b	a	a	b	a	b	b	a	a	b
BBMR_09K03	70.88	a	b	b	a	a	a	b	a	b	b	b	b	b	b	b	b	a	a	a	b	a	b	b	b	a	a	b	a	a	b	b	b	b	a	a	a	a	a	b	a	a	b	a	b	b	a	a	b
AHMR_08B03	72.445	a	b	b	a	a	a	b	a	b	b	b	b	b	b	b	b	a	a	a	b	a	b	b	b	a	a	b	a	a	b	b	b	b	a	a	a	a	a	b	a	a	b	a	b	b	a	a	a
AHMR_03A13	72.445	a	b	b	a	a	a	b	a	b	b	b	b	b	b	b	b	a	a	a	b	a	b	b	b	a	a	b	a	a	b	b	b	b	a	a	a	a	a	b	a	a	b	a	b	b	a	a	-
CAHMR_05D24	73.285	a	b	b	a	a	a	b	a	b	a	b	b	b	b	b	b	a	a	a	b	a	b	b	b	a	a	b	a	a	b	b	b	b	a	a	a	a	a	b	a	a	b	a	b	b	a	a	a
AHMR_08H11	73.285	a	b	b	a	a	a	b	a	b	a	b	b	b	b	b	b	a	a	a	b	a	b	b	b	a	a	b	a	a	b	b	b	b	a	a	a	a	a	b	a	a	b	a	b	b	a	a	a
CAHMR_03A17	73.285	a	b	b	a	a	a	b	a	b	a	b	b	b	b	b	b	a	a	a	b	a	b	b	b	a	a	b	a	a	b	b	b	b	a	a	a	a	a	b	a	a	b	a	b	b	a	a	a
AHMR_04C21	73.285	a	b	b	a	a	a	b	a	b	a	b	b	b	-	b	b	a	a	a	b	a	b	b	b	a	a	b	a	a	b	b	b	b	a	a	a	a	a	-	a	a	b	a	b	b	a	a	a
AHMR_08P24	73.285	a	b	b	a	a	a	b	a	b	a	-	b	b	b	b	b	a	a	a	b	a	b	b	b	a	a	b	a	a	b	b	b	b	a	a	a	a	a	b	a	a	b	a	b	b	a	a	a
AHMR_02B11	73.285	a	b	-	a	a	a	b	a	b	a	b	b	b	b	b	b	a	a	a	-	a	b	b	b	a	a	b	a	a	b	b	b	b	a	a	a	a	a	b	a	a	b	a	b	b	a	a	a
CAHMR_04D02	80.899	b	b	b	a	a	b	b	a	b	a	a	b	b	b	b	b	a	a	b	b	a	b	b	b	a	a	a	a	b	a	b	b	b	a	a	a	a	a	b	a	a	b	a	b	b	a	a	a
CBBMR_09C10	83.184	b	b	b	a	a	b	b	a	b	a	a	b	b	b	b	b	b	a	b	b	a	b	b	b	a	a	-	a	b	a	b	b	b	a	a	a	a	a	b	a	a	b	a	b	b	a	a	a
BBMR_12D11	83.184	b	b	b	a	a	b	b	a	b	a	a	b	b	b	b	b	b	a	b	b	a	b	b	b	a	a	a	a	b	a	b	b	b	a	a	a	a	a	b	a	a	b	a	b	b	a	a	a
BHMR_12J22	83.184	b	b	b	a	a	b	b	a	b	a	a	b	b	-	b	b	b	a	b	b	a	b	b	b	-	a	a	a	b	a	b	b	b	a	a	a	a	a	b	a	a	b	a	b	b	-	a	a
CBBMR_14J04	84.479	b	b	b	a	a	b	b	a	b	a	a	b	b	b	b	b	b	a	b	b	a	b	b	b	a	b	a	a	b	a	b	b	b	a	a	a	a	a	b	a	a	b	a	b	b	a	a	a
CBBMR_10C10	85.615	b	b	b	a	a	b	b	a	b	a	a	b	b	b	b	b	b	a	b	b	a	b	b	b	a	b	a	a	b	a	b	b	b	a	b	a	a	a	b	a	a	b	a	b	b	a	a	a
AHMR_08P05	86.253	b	b	b	a	a	-	-	a	b	a	a	b	b	b	b	b	b	a	b	b	a	b	b	b	a	b	a	a	-	a	b	b	b	a	b	a	a	a	b	a	a	b	a	b	b	a	a	a
BHMR_16G18	86.253	b	b	b	a	a	b	b	a	b	a	a	b	b	b	b	b	b	a	b	b	a	b	b	b	a	b	a	a	b	a	b	b	b	a	b	a	a	a	b	a	a	b	a	b	b	a	a	a
BBMR_15P07	86.253	b	b	b	a	a	b	b	a	b	a	-	b	b	b	b	b	b	a	b	b	a	b	b	b	a	b	a	a	b	a	b	b	b	a	b	a	a	a	b	a	a	b	a	b	b	a	a	a
ABMR_07C17	87.31	b	b	b	a	a	b	b	a	b	a	a	b	b	b	b	b	b	a	b	b	a	b	b	b	a	b	a	a	b	a	b	b	b	a	b	a	a	a	b	a	a	b	a	b	b	a	a	a
ABMR_06K19	87.31	b	b	b	a	a	b	b	a	b	a	a	b	b	b	b	-	b	a	b	b	a	b	b	b	a	b	a	a	b	a	b	b	b	-	b	a	a	a	b	a	a	b	a	b	b	a	a	a
BHMR_10N05	93.21	b	b	b	a	a	b	b	a	b	a	a	b	b	b	a	b	b	a	b	a	a	b	b	b	a	b	a	a	b	a	b	b	b	a	b	a	a	a	b	a	a	b	a	b	b	a	a	a
AHMR_06E22	93.21	b	b	b	a	a	b	b	a	b	a	a	b	-	b	a	b	b	a	b	a	a	b	b	b	a	b	a	a	b	a	b	b	b	a	b	a	a	a	b	a	a	b	a	b	b	a	a	a
BHMR_12P12	94.059	b	b	b	a	a	b	b	a	b	a	a	b	b	b	a	b	b	a	b	a	a	b	b	b	a	b	a	a	b	a	b	b	b	a	b	a	a	a	b	a	a	b	a	b	b	a	a	a
BHMR_14B13	94.059	b	b	b	a	a	b	b	a	b	a	a	b	b	b	a	b	b	-	b	a	a	b	b	b	a	b	a	a	b	a	b	b	b	a	b	a	a	a	b	a	a	b	a	b	b	a	a	a
AHMR_02N03	94.059	b	b	b	a	a	b	b	a	b	a	a	b	b	-	a	b	b	a	b	a	a	b	b	b	a	b	a	a	b	a	b	b	b	a	b	a	a	a	b	a	a	b	a	b	b	a	a	a
ABMR_02P16	98.556	b	b	b	a	a	b	b	a	b	a	a	b	b	b	a	b	b	a	b	a	a	b	b	a	a	b	b	a	b	a	b	b	b	a	b	a	a	a	b	a	a	b	a	b	b	a	a	a
ABMR_06N16	98.556	b	b	b	a	a	b	b	a	b	a	a	b	b	b	a	b	b	a	b	a	a	b	b	a	a	b	b	a	b	a	b	b	b	a	b	a	a	a	b	a	a	b	a	b	b	a	a	a
CBBMR_14P08	98.556	b	b	b	a	a	b	b	a	b	a	a	b	b	b	a	b	b	a	b	a	a	b	b	a	a	b	b	a	b	a	b	b	b	a	b	a	a	a	b	a	a	b	a	b	b	a	a	a
ABMR_06H10	98.556	b	b	b	a	a	b	b	a	b	a	a	b	b	b	a	b	b	a	b	a	a	b	b	a	a	b	b	a	b	a	b	b	b	a	b	a	a	a	b	a	a	b	a	b	b	a	a	a
BHMR_16C20	100.229	b	b	b	a	a	b	b	a	b	a	a	b	b	b	a	b	b	a	b	a	a	b	b	a	a	b	b	a	b	a	b	b	b	a	b	a	a	a	b	a	a	b	a	b	b	a	a	a
CBHMR_13F09	102.018	b	b	b	a	a	b	b	a	b	a	a	b	b	b	a	b	b	a	b	a	a	b	b	a	a	b	b	a	b	a	b	b	b	a	b	a	a	a	b	a	a	b	a	b	b	a	a	a
BHMR_13F05	102.018	b	b	b	-	a	b	b	a	b	a	a	b	b	b	a	b	b	a	b	a	a	b	b	a	a	b	b	a	b	a	b	b	b	a	b	a	a	a	b	a	a	b	a	b	b	a	a	a
BBMR_11N03	104.873	b	b	b	a	a	b	b	a	b	a	b	b	b	b	a	b	b	a	b	a	a	b	b	a	a	b	b	a	b	a	b	b	b	a	b	a	a	a	b	a	a	b	a	b	b	a	a	a
CABMR_08J01	104.873	b	b	b	a	a	b	b	a	b	a	b	b	b	b	a	b	b	a	b	a	a	b	b	a	a	b	b	a	b	a	b	b	b	a	b	a	a	a	b	a	a	b	-	b	b	a	a	a
CABMR_07H02	104.873	b	b	b	a	a	b	b	a	b	a	b	b	b	b	a	b	b	a	b	a	a	b	b	a	a	b	b	-	-	a	b	b	b	a	b	a	a	a	b	a	a	b	a	b	b	a	a	a
AHMR_03I22	104.873	b	b	b	a	a	b	b	a	b	a	b	b	b	b	a	b	b	a	b	a	a	b	b	a	a	b	b	-	b	a	b	b	b	a	b	a	a	a	b	a	a	b	a	b	b	a	a	a
ABMR_05D23	104.873	b	b	b	a	a	b	b	a	b	a	b	b	b	b	a	b	b	a	b	a	a	b	b	a	a	b	-	a	b	a	b	b	b	a	b	a	a	a	b	a	a	b	a	b	b	a	a	a
AHMR_08N05	104.873	b	-	b	a	a	b	b	a	b	a	b	b	b	b	a	b	b	a	b	a	a	b	b	a	a	b	-	a	b	a	b	b	b	a	b	a	a	a	b	a	a	-	a	b	-	-	a	a
BHMR_13I14	105.779	b	b	b	a	a	b	b	a	b	a	b	b	b	b	a	b	b	a	b	a	a	b	b	a	a	b	b	a	b	a	b	b	b	a	b	a	a	a	b	a	a	b	a	b	b	a	a	a
CBHMR_15A14	105.779	b	b	b	a	a	b	b	a	b	a	b	b	b	b	a	b	b	a	b	a	a	b	b	a	a	b	b	a	b	a	b	b	b	a	b	a	a	a	b	a	a	b	a	b	b	a	a	a
CABMR_06F19	109.117	b	b	b	a	a	b	b	a	b	a	b	b	b	b	a	b	a	a	b	a	a	b	b	a	a	b	b	a	b	a	b	b	b	a	b	a	a	a	b	b	a	a	a	b	b	a	a	a
AHMR_01J19	113.435	b	b	b	a	a	b	b	a	b	a	b	b	b	b	a	b	a	b	a	a	a	b	b	a	a	b	b	a	b	a	b	b	b	a	b	a	a	a	b	b	a	a	a	b	b	a	a	a
BHMR_14N13	113.435	b	b	b	a	a	b	b	a	b	a	b	b	b	b	a	b	a	b	a	a	a	b	b	a	a	b	b	a	b	a	b	b	b	a	b	a	a	a	b	b	a	a	a	b	-	-	a	a
BHMR_09I02	114.345	b	b	b	a	a	b	b	a	b	a	b	b	b	b	a	b	a	b	a	a	a	a	b	a	a	b	b	a	b	a	b	b	b	a	b	a	a	a	b	b	a	a	a	-	b	a	a	a
BHMR_16M24	133.461	b	-	b	a	a	b	b	a	b	a	b	b	a	a	a	b	a	b	a	a	a	a	a	a	a	b	b	a	b	a	b	b	b	b	a	a	a	a	a	b	a	a	b	b	a	a	a	a
BBMR_10C24	134.351	b	b	b	a	a	b	b	a	b	a	b	b	a	a	a	b	a	b	a	a	a	a	a	a	a	b	b	a	b	a	b	b	b	b	a	a	a	a	a	b	a	a	b	b	a	a	a	a
BBMR_15O24	134.351	b	b	b	a	a	b	b	a	b	a	b	b	a	a	a	b	a	b	a	a	a	a	a	a	a	b	b	a	b	a	b	b	b	b	a	a	a	a	a	b	a	a	b	b	a	a	a	a
BHMR_14M02	134.351	b	b	b	a	a	b	b	a	b	a	b	b	a	a	a	b	a	b	a	a	a	a	a	a	a	b	b	a	b	a	b	b	b	b	a	a	a	a	a	b	a	a	b	b	a	a	a	a
CBBMR_14M22	134.351	b	b	b	a	a	b	b	a	b	a	b	b	a	a	a	b	a	b	a	a	a	a	a	a	a	b	b	a	b	a	b	b	b	b	a	a	a	a	a	b	a	a	b	b	a	a	a	a
BHMR_10J19	134.351	b	b	b	a	a	b	b	a	b	-	b	b	a	a	a	b	a	b	a	a	a	a	a	a	a	b	b	a	b	a	b	-	b	b	a	a	a	a	a	b	a	a	b	b	a	a	a	a
BHMR_16E24	134.351	b	b	b	a	a	b	b	a	b	a	b	b	a	a	a	b	a	b	a	a	a	a	a	a	a	b	b	a	b	a	b	b	b	b	a	a	a	a	a	b	a	a	b	b	a	a	a	a
BHMR_11J06	134.351	b	b	b	a	a	b	b	a	b	a	b	b	a	a	a	b	a	b	a	a	a	a	a	a	a	b	b	a	b	a	b	b	b	b	a	a	a	a	a	b	a	a	b	b	a	-	a	a
Cag-0003	135.207	b	b	b	a	a	b	b	a	b	a	b	b	a	a	a	b	a	b	a	a	a	a	a	a	a	b	b	a	b	a	b	b	b	b	a	a	a	a	a	b	a	a	b	b	a	a	a	a
CABMR_03E17	142.346	b	b	b	a	a	b	b	a	b	a	b	b	a	a	a	b	a	b	a	a	a	a	a	a	a	b	b	a	b	b	b	b	b	b	a	a	a	a	a	b	b	a	b	b	-	a	a	a
CBBMR_10M04	146.872	b	b	b	a	a	b	b	a	b	a	b	b	a	a	a	b	a	b	a	a	a	a	a	b	a	b	b	a	b	b	b	b	b	b	a	a	a	a	a	b	b	a	b	b	a	b	a	a
ABMR_07E04	146.872	b	b	b	a	a	b	b	a	b	a	b	b	a	a	a	b	a	b	a	a	a	a	a	b	a	b	b	a	b	b	b	b	b	b	a	a	a	a	a	b	b	a	b	b	a	b	a	a
CABMR_04D15	146.872	b	b	b	a	a	b	b	a	b	a	b	b	a	a	a	b	a	b	a	a	a	a	a	b	a	b	b	a	b	b	b	b	b	-	a	a	a	a	a	b	b	a	b	b	a	b	a	a
BBMR_09A14	147.567	b	b	b	a	a	b	b	a	b	a	b	b	a	a	a	b	a	b	a	a	a	a	a	b	a	b	b	a	b	b	b	b	b	b	a	a	a	a	a	b	b	a	b	b	a	b	a	a
BHMR_14G23	147.567	b	b	b	a	a	b	b	a	b	a	b	b	a	a	a	b	a	b	a	a	a	a	a	b	a	b	b	a	b	b	b	b	b	b	a	a	a	a	a	b	b	a	b	b	a	b	a	a
BBMR_14C21	147.567	b	b	b	a	a	b	b	a	b	a	b	b	a	a	a	b	a	b	a	a	a	a	a	b	a	b	b	a	b	b	b	b	b	b	a	a	a	a	a	b	-	a	-	b	a	b	a	a
BHMR_13P22	147.567	b	b	b	a	a	b	b	a	b	a	b	b	a	a	a	b	a	b	a	a	a	a	a	b	a	b	b	a	b	b	b	b	b	b	a	a	a	a	a	b	b	a	b	b	-	b	a	a
BBMR_11G21	147.567	b	b	b	a	a	b	b	a	b	a	b	b	a	a	a	b	a	b	a	a	a	a	a	b	a	b	b	a	b	b	b	b	b	b	a	a	a	a	a	b	b	a	b	b	a	b	a	a
BHMR_09F17	147.567	b	b	b	a	a	b	b	a	b	a	b	b	a	a	a	b	a	b	a	a	a	a	-	b	a	b	b	a	b	b	b	b	b	b	a	a	a	a	a	b	b	a	b	b	-	b	a	a
CBHMR_13D12	154.311	b	b	a	a	a	b	b	a	b	a	b	a	a	a	a	b	a	b	a	a	a	a	a	b	a	b	a	a	b	b	b	b	b	b	a	b	a	a	a	b	b	a	b	b	a	b	a	a
group 3+22
BHMR_11I12	0	a	b	a	b	a	a	b	a	a	a	b	a	b	b	b	b	b	b	a	b	b	b	b	a	b	a	a	b	a	a	b	b	a	b	a	b	a	b	a	b	b	a	a	b	a	a	b	b
AHMR_07C17	1.695	a	b	a	b	a	a	-	a	a	a	b	a	-	b	b	b	b	b	a	b	b	b	b	a	b	a	a	-	a	a	b	b	a	b	a	b	b	b	a	b	b	a	a	b	-	-	b	b
BBMR_12M19	1.695	a	b	a	b	a	a	b	a	a	a	b	a	b	b	b	b	b	b	a	b	b	b	b	a	b	a	a	b	a	a	b	b	a	b	a	b	b	b	a	b	b	a	a	b	a	a	b	b
ABMR_03L07	2.495	a	b	a	b	a	a	b	a	a	a	b	a	b	b	b	b	b	b	a	b	b	b	b	a	b	a	a	b	a	a	b	b	a	b	a	b	b	b	a	b	b	a	b	b	a	a	b	b
AHMR_08C12	10.387	a	-	-	b	a	a	-	b	a	a	b	a	b	b	b	b	b	b	a	b	b	-	b	a	b	-	a	b	-	a	b	b	-	b	a	b	b	b	b	b	b	a	b	b	a	a	b	a
CBBMR_09J20	19.559	a	a	a	b	a	b	a	b	a	a	b	a	b	b	b	b	b	b	a	b	b	b	b	a	b	a	a	b	a	b	b	b	b	b	a	b	b	b	a	b	b	a	b	b	a	a	b	a
AHMR_07J21	24.637	a	a	a	b	a	b	a	b	a	a	b	a	b	b	b	b	b	b	a	b	b	b	b	a	b	a	a	b	a	b	b	b	b	b	a	b	b	b	b	a	b	b	b	b	a	a	b	a
BBMR_09D01	24.637	a	a	a	b	a	b	a	b	a	a	b	a	b	b	b	b	b	b	a	b	b	b	b	a	b	a	a	b	a	b	b	b	b	b	a	b	b	b	b	a	b	b	b	b	a	a	b	a
BBMR_10K13	24.637	a	a	a	b	a	b	a	b	a	a	b	a	b	b	b	b	b	b	a	b	b	b	b	a	b	a	a	b	a	b	b	b	b	b	a	b	b	b	b	a	b	b	b	b	a	a	b	a
CAHMR_04J17	24.637	a	a	a	b	a	b	a	b	a	a	b	a	b	b	b	b	b	b	a	b	b	b	b	a	b	a	a	b	a	b	b	b	b	b	a	b	b	b	b	a	b	b	b	b	a	a	b	a
CBBMR_10B19	24.637	a	a	a	b	a	b	a	b	a	a	b	a	b	b	b	b	b	b	a	b	b	b	b	a	b	a	a	b	a	b	b	b	b	b	a	b	b	b	b	a	b	b	b	b	a	a	b	a
CBBMR_10C19	24.637	a	a	a	b	a	b	a	b	a	a	b	a	b	b	b	b	b	b	a	b	b	b	b	a	b	a	a	b	a	b	b	b	b	b	a	b	b	b	b	a	b	b	b	b	a	a	b	a
BBMR_16D11	33.35	a	a	a	b	a	b	a	b	a	a	b	a	b	b	b	b	b	a	a	b	a	b	b	a	b	a	-	b	a	b	b	b	b	a	a	b	b	b	b	a	b	b	b	b	a	a	b	a
BHMR_13H15	35.068	a	a	a	b	a	b	a	b	a	a	b	a	b	b	b	b	b	a	a	b	a	b	b	a	b	a	a	b	a	b	b	b	b	a	a	b	b	b	b	a	b	b	b	b	a	a	b	a
AHMR_05L02	44.659	a	a	a	b	-	b	a	b	b	a	b	a	a	a	b	b	b	a	b	b	a	b	a	a	b	a	a	b	b	b	b	b	b	a	a	b	b	b	b	a	b	b	b	b	a	a	b	a
CAHMR_01N01	44.659	a	a	a	b	a	b	a	b	b	a	b	a	a	a	b	b	b	a	b	b	a	b	a	a	b	a	a	b	b	b	b	b	b	a	a	b	b	b	b	a	b	b	b	b	a	a	b	a
AHMR_05K07	45.496	a	a	a	b	a	b	a	b	b	a	b	a	a	a	b	b	b	a	b	b	a	b	a	a	b	a	a	b	b	-	b	b	b	a	a	b	b	b	b	a	b	b	b	b	a	a	b	a
BBMR_13G15	48.164	a	a	a	b	a	b	a	b	b	a	b	a	a	a	b	b	b	a	b	b	a	b	a	a	b	a	a	b	b	b	b	b	b	-	b	b	b	b	b	a	a	b	b	b	a	a	b	a
BHMR_12A18	48.164	a	a	a	b	a	b	a	b	b	a	b	a	a	a	b	b	b	a	b	b	a	b	a	a	b	a	a	b	b	b	b	b	b	a	b	b	b	b	b	a	a	b	b	b	a	a	b	a
CBBMR_15H01	50.072	a	a	a	-	a	b	a	b	b	a	b	a	a	a	b	b	b	a	b	b	a	b	a	a	b	a	a	b	b	b	b	-	b	a	b	b	b	a	b	a	a	b	b	b	a	a	b	a
CBHMR_15D02	50.072	a	a	a	b	a	b	a	b	b	a	b	a	a	a	b	b	b	a	b	b	a	b	a	a	b	a	a	b	b	b	b	b	b	a	b	b	b	a	b	a	a	b	b	b	a	a	b	a
BHMR_15L11	52.487	a	a	a	b	a	b	a	b	b	a	b	a	a	a	b	b	b	a	b	b	a	b	a	a	b	a	a	b	b	b	b	b	b	a	b	b	b	a	b	a	a	b	b	b	a	a	b	a
CAHMR_02P17	60.5	a	a	a	b	a	b	a	b	b	a	b	a	a	a	b	a	a	a	b	b	a	b	a	b	b	a	a	b	b	b	a	b	a	a	b	b	b	a	b	a	a	b	b	b	a	a	-	a
CAHMR_03P24	60.5	a	a	a	b	a	b	a	b	b	a	b	a	a	a	b	a	a	a	b	b	a	b	a	b	b	a	a	b	b	b	a	b	a	a	b	b	b	a	b	a	a	b	b	b	a	a	b	a
CAHMR_06K18	60.5	a	a	a	b	a	b	a	b	b	a	b	a	a	a	b	a	a	a	b	b	a	b	a	b	b	a	a	b	b	b	a	b	a	a	b	b	b	a	b	a	a	b	b	b	a	a	b	a
CBHMR_11E22	61.326	a	a	a	a	a	b	a	b	b	a	b	a	a	a	b	a	a	a	b	b	a	b	a	b	b	a	a	b	b	b	a	b	a	a	b	b	b	a	b	a	a	b	b	b	a	a	b	a
CBHMR_13C20	61.326	a	a	a	a	a	b	a	b	b	a	b	a	a	a	b	a	a	a	b	b	a	b	a	b	b	a	a	b	b	b	a	b	a	a	b	b	b	a	b	a	a	b	b	b	a	a	b	a
CBHMR_14N08	61.326	a	a	a	a	a	b	a	b	b	a	b	a	a	a	b	a	a	a	b	b	a	b	a	b	b	a	a	b	b	b	a	b	a	a	b	b	b	a	b	a	a	b	b	b	a	a	b	a
CBHMR_16P23	61.326	a	a	a	a	a	b	a	b	b	a	b	a	a	a	b	a	a	a	b	b	a	b	a	b	b	a	a	b	b	b	a	b	a	a	b	b	b	a	b	a	a	b	b	b	a	a	b	a
AHMR_01A09	63.045	a	a	a	a	a	b	a	b	b	a	b	a	a	a	b	a	a	a	b	b	a	b	a	b	b	a	a	b	b	b	a	b	a	a	b	b	b	a	-	a	a	b	b	b	a	a	b	a
AHMR_05K18	63.045	a	a	a	a	a	b	a	b	b	a	b	a	a	a	b	a	a	a	b	b	a	b	a	b	b	a	a	b	b	b	a	b	a	a	b	b	b	a	b	a	a	b	b	b	a	a	b	a
ABMR_02I18	63.747	a	a	a	a	a	b	a	b	b	a	b	a	a	a	b	a	a	a	b	b	a	b	a	b	b	a	a	b	b	b	a	b	a	a	b	b	b	a	b	a	a	b	b	b	a	a	b	a
AHMR_02H08	63.747	a	a	a	a	a	b	a	b	b	a	b	a	a	a	b	a	a	a	b	b	a	b	a	b	b	a	a	b	b	b	a	b	a	a	b	b	b	a	b	a	a	b	b	b	a	a	b	a
AHMR_04I03	63.747	a	a	a	a	a	b	a	b	b	a	b	a	a	a	b	a	a	a	b	b	a	b	a	b	b	a	a	b	b	b	a	b	a	a	b	b	b	a	b	a	a	b	-	b	a	a	b	a
AHMR_04M01	63.747	a	a	a	a	a	b	a	b	b	a	b	a	a	a	b	a	a	a	b	b	a	b	a	b	b	a	a	b	b	b	a	b	a	a	b	b	b	a	b	a	a	b	b	b	a	a	b	a
AHMR_06K23	63.747	a	-	-	a	a	b	-	b	b	a	b	a	-	a	b	a	a	a	b	b	-	b	a	b	b	a	a	-	-	-	-	b	a	a	b	b	b	a	b	a	a	-	b	b	a	a	b	a
AHMR_08D19	63.747	a	a	a	a	a	b	a	b	b	a	b	a	a	a	b	a	a	a	b	b	a	b	a	b	b	a	a	b	-	b	a	b	a	a	b	b	-	a	b	a	a	b	b	b	a	a	b	a
BBMR_09K16	63.747	a	a	a	a	a	b	a	b	b	a	b	a	a	a	b	a	a	a	b	b	a	b	a	b	b	a	a	b	b	b	a	b	a	a	b	b	b	a	b	a	a	b	b	b	a	a	b	a
BBMR_10I02	63.747	a	a	a	a	a	b	a	b	b	a	b	a	a	a	b	a	a	a	b	b	a	b	a	b	b	a	a	b	-	b	a	b	a	a	b	b	b	a	b	a	a	b	b	b	a	a	b	a
BHMR_09F23	63.747	a	a	a	a	a	b	-	b	b	a	b	a	a	a	b	a	a	a	b	b	a	b	a	b	b	a	a	b	b	b	a	b	a	a	b	b	b	a	b	a	a	b	b	b	a	a	b	a
BHMR_09P13	63.747	a	a	a	a	a	b	a	b	b	a	b	a	a	a	b	a	a	a	b	b	a	b	a	b	b	a	a	b	b	b	-	b	a	a	b	b	b	a	b	a	a	b	b	b	a	a	b	a
BHMR_12D07	63.747	a	a	a	a	a	b	a	b	b	a	b	-	a	a	b	a	a	a	b	b	a	b	a	b	b	a	a	b	b	b	a	b	a	a	b	b	b	a	b	a	a	b	b	b	a	a	b	a
CABMR_07N16	63.747	a	a	a	a	a	b	a	b	b	a	b	a	a	a	b	a	a	a	b	b	a	b	a	b	b	a	a	b	b	b	a	b	a	a	b	b	b	a	b	a	a	b	b	b	a	a	b	a
CAHMR_08N04	63.747	a	a	a	a	a	b	a	b	b	a	b	a	a	a	b	a	a	a	b	b	a	b	a	b	b	a	a	b	b	b	a	b	a	a	b	b	b	a	b	a	a	b	b	b	a	a	b	a
CBHMR_10H11	63.747	a	a	a	a	a	b	a	b	b	a	b	a	a	a	b	a	a	a	b	b	a	b	a	b	b	a	a	b	b	b	a	b	a	a	b	b	b	a	b	a	a	b	b	b	a	a	b	a
CBHMR_12M18	63.747	a	a	a	a	a	b	a	b	b	a	b	a	a	a	b	a	a	a	b	b	a	b	a	b	b	a	a	b	b	b	a	b	a	a	b	b	b	a	b	a	a	b	b	b	a	a	b	a
CBHMR_16F17	63.747	a	a	a	a	a	b	a	b	b	a	b	a	a	a	b	a	a	a	b	b	a	b	a	b	-	a	a	b	b	-	a	b	a	a	b	b	b	a	-	a	a	b	b	b	a	a	b	a
AHMR_08E11	64.114	a	a	a	a	a	b	a	b	b	a	b	a	a	a	b	a	a	a	b	b	a	b	a	b	b	a	a	b	b	b	a	b	a	a	b	b	b	a	b	a	a	b	b	b	a	a	b	a
AHMR_04P06	66.928	a	-	-	a	a	b	-	b	a	a	b	a	-	a	b	a	a	a	b	b	a	b	a	b	a	-	a	a	b	-	a	-	a	a	b	b	b	a	b	a	a	b	b	b	a	a	b	a
AHMR_05K08	72.676	a	a	a	a	a	b	a	b	a	-	b	a	a	a	b	a	a	a	b	b	a	b	a	b	a	b	a	a	b	b	a	b	a	a	b	b	b	b	b	a	a	b	b	b	a	a	b	a
AHMR_08L10	73.52	a	a	a	a	a	b	a	b	a	a	b	a	a	a	b	a	a	a	a	b	a	b	a	b	a	b	a	a	b	b	a	b	a	a	b	b	b	b	b	a	a	b	-	b	a	a	b	a
BBMR_12K17	74.244	a	a	a	a	a	b	a	b	a	a	b	a	a	a	b	a	a	a	a	b	a	b	a	b	a	b	a	a	b	b	a	b	a	a	b	b	b	b	b	a	a	b	b	b	a	a	b	a
BHMR_13P17	75.658	a	a	a	a	a	b	a	b	a	a	b	a	a	a	b	a	a	a	a	b	a	b	a	b	a	b	a	a	b	b	a	b	a	a	b	b	b	b	b	a	a	b	b	b	a	a	b	a
BHMR_16G03	75.658	a	a	a	a	a	b	a	b	a	a	b	a	a	a	b	a	a	a	a	b	a	b	a	b	a	b	a	a	b	b	a	b	a	a	b	b	b	b	b	a	a	b	b	b	a	a	b	a
CABMR_08B03	75.658	a	a	a	a	a	b	a	b	a	a	b	a	a	a	b	a	a	a	a	b	a	b	a	b	a	b	a	a	b	b	a	b	a	a	b	b	b	b	b	a	a	b	b	b	a	a	b	a
BHMR_14D02	76.149	a	a	a	a	-	b	a	b	a	a	b	a	a	a	b	a	a	a	a	b	a	b	a	b	a	b	a	a	b	b	a	b	a	a	b	b	b	-	b	a	a	b	b	b	a	b	b	a
AHMR_08H14	77.049	a	a	a	a	a	b	a	b	a	a	b	a	a	a	b	a	a	a	a	b	a	b	a	b	a	b	a	a	b	b	a	b	a	a	b	b	b	b	b	a	a	b	b	b	a	a	b	a
CBBMR_10F14	77.049	a	a	a	a	a	b	a	b	a	a	b	a	a	a	b	a	a	a	a	b	a	b	a	b	a	b	a	a	b	b	a	b	a	a	b	b	b	b	b	a	a	b	b	b	a	a	b	a
CBBMR_10K24	77.049	a	a	a	a	a	b	a	b	a	a	b	a	a	a	b	a	a	a	a	b	a	b	a	b	a	b	a	a	b	b	a	b	a	a	b	b	b	b	b	a	a	b	-	b	a	a	b	a
CBBMR_11O13	77.049	a	a	a	a	a	b	a	b	a	a	b	a	a	a	b	a	a	a	a	b	a	b	a	b	a	b	a	a	b	b	a	b	a	a	b	b	b	b	b	a	a	b	b	b	a	a	b	a
CABMR_07L22	82.95	a	a	a	a	a	b	a	b	a	a	b	a	a	a	b	b	a	a	a	b	a	b	a	b	a	a	a	a	b	b	a	b	a	a	b	b	b	b	b	a	a	b	b	b	a	a	b	a
ABMR_05D21	91.173	a	a	a	a	a	b	a	b	a	a	b	a	a	a	a	b	a	b	a	b	a	b	a	b	a	a	a	a	b	b	a	b	a	a	b	a	b	b	b	a	a	b	b	b	a	a	b	b
BHMR_16J22	119.867	a	b	a	a	a	b	b	b	b	a	a	b	a	a	a	b	a	b	b	a	a	b	a	a	a	a	b	a	b	b	a	a	a	b	b	a	b	b	a	a	b	b	b	a	a	b	b	b
Cavr	125.605	a	b	a	a	a	b	b	b	b	a	a	b	a	a	a	b	a	b	b	a	a	b	a	a	a	a	b	a	b	b	a	a	b	b	b	a	b	b	a	a	b	b	b	a	a	b	a	b
CAHMR_02H17	126.416	a	b	a	a	a	b	b	b	b	a	a	b	a	a	a	b	a	b	b	a	a	b	a	a	a	a	b	a	b	b	a	a	b	b	b	a	b	b	a	a	b	b	b	a	a	b	a	b
CAHMR_04N24	126.416	a	b	a	a	a	b	b	b	b	a	a	b	a	a	a	b	a	b	b	a	a	b	a	a	a	a	b	a	b	b	a	a	b	b	b	a	b	b	a	a	b	b	b	a	a	b	a	b
group 4+17
CBHMR_15H04	0	a	a	b	b	a	b	a	a	b	a	a	a	a	b	a	b	a	b	a	b	b	b	a	a	b	a	a	a	b	a	b	b	a	b	b	a	a	a	a	b	b	b	b	b	a	a	a	b
BHMR_10K06	1.653	a	a	b	b	a	b	a	a	b	a	a	a	a	b	a	b	a	b	a	b	b	b	a	a	b	a	a	a	b	a	b	b	a	b	b	a	a	a	a	b	b	b	b	b	a	a	a	b
CBHMR_14N21	3.282	a	a	b	b	a	b	a	b	b	a	a	a	a	b	a	b	a	b	a	b	b	b	-	a	b	a	a	a	b	a	b	b	a	b	b	a	a	a	a	b	b	b	b	b	a	a	a	b
ABMR_04L05	10.912	a	a	b	b	a	b	a	b	b	a	b	a	a	b	a	a	a	b	a	b	b	b	a	a	b	a	b	a	b	a	b	b	a	b	b	a	a	a	a	b	b	a	a	b	b	a	a	b
AHMR_02B03	15.198	a	a	b	b	a	b	a	b	b	a	b	a	a	b	a	a	a	b	a	b	b	b	a	a	b	a	b	a	b	a	b	b	a	b	b	a	a	a	a	b	b	a	a	a	b	a	a	b
AHMR_07L11	15.198	a	a	b	b	a	b	a	b	b	a	b	a	a	b	a	a	a	b	a	b	b	b	a	a	b	a	b	a	b	a	b	b	a	b	b	a	a	a	a	b	b	a	a	a	b	a	a	b
CAHMR_07L16	15.198	a	a	b	-	a	b	a	b	b	a	b	a	a	b	a	a	a	b	a	b	b	b	a	a	b	a	b	a	b	a	b	b	a	b	b	a	a	a	a	b	b	a	a	a	b	a	a	b
CAHMR_08D20	15.198	a	a	b	b	a	b	a	b	b	a	b	a	a	b	a	a	a	b	a	b	b	b	a	a	b	a	b	a	b	a	b	b	a	b	b	a	-	a	a	b	b	a	a	a	b	a	a	b
CBBMR_15K01	15.198	a	a	b	b	a	b	a	b	b	a	b	a	-	b	a	a	a	b	a	b	b	b	a	a	b	a	b	a	b	a	b	b	a	b	b	a	a	a	a	b	b	a	a	a	b	a	a	b
BHMR_15F05	15.198	a	a	b	b	a	b	a	b	b	a	b	a	a	b	a	a	a	b	a	b	b	b	a	a	b	a	b	a	b	a	b	b	a	b	b	a	a	a	a	b	b	a	a	a	b	a	a	b
BBMR_13C08	15.198	a	a	b	b	a	b	a	b	b	a	b	a	-	b	a	a	a	b	a	b	b	b	a	a	b	a	b	a	b	a	b	b	a	b	b	a	a	a	a	b	b	a	a	a	b	a	a	b
BBMR_16L15	15.198	a	a	b	b	a	b	a	b	b	a	b	a	a	b	a	a	a	b	a	b	b	b	a	a	b	a	b	a	b	a	b	b	a	b	b	a	a	a	a	b	b	a	a	a	b	a	a	b
CABMR_07A05	19.525	a	a	b	b	a	b	a	b	b	a	b	b	a	b	a	a	b	b	a	a	b	b	a	a	b	a	b	a	-	a	b	b	a	b	b	a	a	a	a	-	b	a	a	a	b	b	a	b
CABMR_05O14	19.525	a	a	b	b	a	b	a	b	b	a	b	b	a	b	a	a	b	b	a	a	b	b	a	a	b	a	b	a	b	a	b	b	a	b	b	a	a	a	a	b	-	a	a	a	-	b	a	b
ABMR_01J15	19.525	a	a	b	b	a	b	a	b	b	a	b	b	a	b	a	a	b	b	a	a	b	b	a	a	b	a	b	a	b	a	b	b	a	b	b	a	a	a	a	b	b	a	a	a	b	b	-	b
CAHMR_03H20	21.241	a	a	b	b	a	b	a	b	b	a	b	b	a	b	a	a	b	b	a	a	b	b	a	a	b	a	b	a	b	a	b	b	b	b	b	a	a	a	a	b	b	a	a	a	b	b	a	b
CAHMR_03H24	21.241	a	a	b	b	a	b	a	b	b	a	b	b	a	b	a	a	b	b	a	a	b	b	a	a	b	a	b	a	b	a	b	b	b	b	b	a	a	a	a	b	b	a	a	a	b	b	a	b
CAHMR_05G10	21.241	a	a	b	b	a	b	a	b	b	a	b	b	a	b	a	a	b	b	a	a	b	b	a	a	b	a	b	a	b	a	b	b	b	b	b	a	a	a	a	b	b	a	a	a	b	b	a	b
CBHMR_13M05	21.241	a	a	b	b	a	b	a	b	b	a	b	b	a	b	a	a	b	b	a	a	b	b	a	a	b	a	b	a	b	a	b	b	b	b	b	a	a	a	a	b	b	a	a	a	b	b	a	b
CBBMR_15L03	32.888	a	b	b	a	a	b	a	b	b	a	b	b	a	b	b	a	b	b	a	a	b	b	a	a	b	a	b	a	b	a	b	b	b	b	b	a	a	b	a	b	a	a	a	a	b	b	a	b
CBHMR_15F11	32.888	a	b	b	a	a	b	a	b	b	a	b	b	a	b	b	a	b	b	a	a	b	b	a	a	b	a	b	a	b	a	b	b	b	b	b	a	a	b	a	b	a	a	a	a	b	b	a	b
BHMR_10H18	32.888	a	b	b	a	a	b	a	b	b	a	b	b	a	b	b	a	b	b	a	a	b	b	a	a	b	a	b	a	b	a	b	b	b	b	b	-	a	b	a	b	-	a	-	a	b	b	-	b
BBMR_09J08	35.124	a	b	b	a	a	b	a	b	b	a	b	b	b	b	b	a	b	b	b	a	b	b	a	a	b	a	b	a	b	a	b	b	b	b	b	a	a	b	a	b	a	a	a	a	b	b	a	b
BBMR_12P03	36.986	a	b	b	a	a	b	a	b	b	a	b	b	b	b	b	a	b	b	b	a	b	a	a	a	b	a	b	a	b	a	b	b	b	b	b	a	a	b	a	b	a	a	a	a	b	b	a	b
BHMR_15K23	37.621	a	b	b	a	a	b	a	b	b	a	b	b	b	b	b	a	b	b	b	a	b	a	a	a	b	a	b	a	b	a	b	b	b	a	b	a	a	b	a	b	a	a	a	a	b	b	a	b
BHMR_12J05	37.621	a	b	b	a	a	b	a	b	b	a	b	b	b	b	b	a	b	b	b	a	b	a	a	a	b	a	b	a	b	a	b	b	b	a	b	a	a	b	a	b	a	a	a	a	b	b	a	b
CABMR_07I24	44.225	a	b	b	a	a	b	a	b	b	a	b	b	b	b	b	a	b	b	b	a	b	a	a	a	b	a	b	a	b	a	b	b	b	a	b	a	b	b	a	b	a	a	a	a	b	b	a	b
CABMR_06L14	44.225	a	b	b	a	a	b	a	b	b	a	b	b	b	b	b	a	b	b	b	a	b	a	a	a	b	a	b	a	b	a	b	b	b	a	b	a	b	b	a	b	a	a	a	a	b	b	a	b
AHMR_01C14	44.225	a	b	b	a	a	b	a	b	b	a	b	b	b	b	b	a	b	b	b	a	b	a	a	a	b	a	b	a	-	a	b	b	b	a	b	a	b	b	a	b	a	a	a	a	b	b	a	b
AHMR_06K12	44.225	a	b	b	-	a	b	a	b	b	a	b	b	b	b	b	a	b	b	b	a	b	a	a	a	b	a	b	a	-	a	b	-	b	a	b	a	b	b	a	b	a	a	a	a	b	b	a	b
CBHMR_12E16	45.047	a	b	b	a	a	b	a	b	b	a	b	b	b	b	b	a	b	b	b	a	b	a	a	a	b	a	b	a	b	a	b	b	b	a	b	a	b	b	a	b	a	a	a	a	b	b	a	b
AHMR_08A04	49.504	a	b	b	a	a	b	a	b	b	a	b	b	a	b	b	a	b	b	b	a	b	a	b	a	b	b	b	a	b	a	b	b	a	a	b	a	b	b	a	b	a	a	a	a	-	b	a	-
ABMR_08P14	51.481	a	b	b	a	a	b	a	b	b	a	b	b	a	b	b	a	b	b	b	a	b	a	b	a	b	b	b	a	b	a	b	b	a	a	b	a	b	b	a	b	a	a	a	a	b	b	a	b
BBMR_15B19	51.481	a	b	b	a	a	b	a	b	b	a	b	b	a	b	b	a	b	b	b	a	b	a	b	a	b	b	b	a	b	a	b	b	a	a	b	a	b	b	a	b	a	a	a	a	b	b	a	b
BHMR_14I23	51.481	a	b	b	a	a	b	a	b	b	a	b	b	a	b	b	a	b	b	b	a	b	a	b	a	b	b	b	a	b	a	b	b	a	a	b	a	b	b	a	b	a	a	a	a	b	b	a	b
BBMR_09A04	51.481	a	b	b	a	a	b	a	b	b	a	b	b	a	b	b	a	b	b	b	a	b	a	b	a	b	b	b	a	-	a	b	b	a	a	b	a	b	b	a	b	a	a	a	a	b	b	a	b
ABMR_01L03	51.481	a	b	b	a	a	b	a	b	b	a	b	b	a	b	b	a	b	b	b	a	b	a	b	-	b	b	b	-	b	a	b	b	a	a	b	a	b	b	a	b	a	a	a	a	b	b	a	b
CABMR_02J08	57.013	a	b	a	a	a	b	a	b	b	a	b	b	a	b	b	a	b	b	b	a	b	a	b	a	b	b	b	a	b	b	b	b	a	a	b	a	b	b	a	b	a	a	a	a	a	b	a	b
CABMR_04I19	57.557	a	b	a	a	a	b	a	b	b	a	b	b	a	b	b	a	b	b	b	a	b	a	b	a	b	b	b	a	b	b	b	b	a	a	b	a	b	b	a	b	a	a	a	a	b	b	a	b
BHMR_09O23	57.557	a	b	a	a	a	b	a	b	b	a	b	b	a	b	b	a	b	b	b	a	b	a	b	a	b	b	b	a	b	b	b	b	a	a	b	a	b	b	a	b	a	a	a	a	b	b	a	b
BHMR_15H07	57.557	a	b	a	a	a	b	a	b	b	a	-	b	a	b	b	a	b	b	b	a	b	a	b	a	b	b	b	a	b	b	b	b	a	a	b	a	b	b	a	b	a	a	a	a	b	b	a	b
CABMR_01B03	57.557	a	b	a	a	a	b	a	b	b	a	b	b	a	b	b	a	b	b	b	a	b	a	b	a	b	b	b	a	-	b	b	b	a	a	b	a	b	b	a	b	a	a	a	-	b	b	a	b
CABMR_03C23	57.557	a	b	a	a	a	b	a	b	b	a	b	b	a	b	b	a	b	b	b	a	b	a	b	a	b	b	b	a	b	b	b	b	a	a	b	a	-	b	a	b	a	a	a	a	-	b	a	b
AHMR_04M04	57.557	a	b	a	a	a	b	a	b	b	a	b	b	a	b	b	a	b	b	b	a	b	a	b	a	b	b	b	a	b	b	b	b	a	a	b	a	b	b	a	b	a	a	a	a	-	b	a	b
BBMR_09O20*	58.384	a	b	a	a	a	b	a	b	b	a	b	b	a	b	b	a	b	b	b	a	b	a	b	a	b	b	b	a	b	b	b	b	a	a	b	a	b	b	a	b	a	a	a	a	b	b	a	b
BBMR_10K05*	58.384	a	b	a	a	a	b	a	b	b	a	b	b	a	b	b	a	b	b	b	a	b	a	b	a	b	b	b	a	b	b	b	b	a	-	b	a	b	b	a	b	a	a	a	a	b	b	a	b
BBMR_10G14*	58.384	a	b	a	a	a	b	a	b	b	a	b	b	-	b	b	a	b	b	b	a	b	a	b	a	b	b	b	a	b	b	b	b	a	-	b	a	b	b	a	b	a	a	a	a	b	b	a	b
CBBMR_10G11	58.598	a	b	a	a	a	b	a	b	b	a	b	b	a	b	b	a	b	b	b	a	b	a	b	a	b	b	b	a	b	b	b	b	a	a	b	a	b	b	a	b	a	a	a	a	b	b	a	b
CBBMR_12J04	58.598	a	b	a	a	a	b	a	b	b	a	b	b	a	b	b	a	b	b	b	a	b	a	b	a	b	b	b	a	b	b	b	b	a	a	b	a	b	b	a	b	a	a	a	a	b	b	a	b
CBBMR_15L23	58.598	a	b	a	a	a	b	a	b	b	a	b	b	a	b	b	a	b	b	b	a	b	a	b	a	b	b	b	a	b	b	b	b	a	a	b	a	b	b	a	b	a	a	a	a	b	b	a	b
BHMR_13D20	58.598	a	b	a	a	a	b	a	b	b	a	b	b	a	b	b	a	b	b	b	a	b	a	b	a	b	b	b	a	b	b	b	b	a	a	b	a	b	b	a	b	a	a	a	a	b	b	a	b
CBBMR_15D08	58.598	a	b	a	a	a	b	a	b	b	a	b	b	a	b	b	a	b	b	b	a	b	a	b	a	b	b	b	a	b	b	b	b	a	a	b	a	b	b	a	b	a	a	a	a	b	b	a	b
CBHMR_13C17	58.598	a	b	a	a	a	b	a	b	b	-	b	b	a	b	b	a	b	b	b	a	b	a	b	a	b	b	b	a	b	b	b	b	a	a	b	a	b	b	a	b	a	a	a	a	b	b	a	b
BBMR_09C09	58.598	a	b	a	a	a	b	a	b	b	a	b	b	-	b	b	a	b	b	b	a	b	a	b	a	b	b	b	a	b	b	b	b	a	a	b	a	b	b	a	b	a	a	a	a	b	b	a	b
BHMR_12F08*	58.598	a	b	a	-	-	b	a	b	b	-	b	b	a	b	b	a	b	b	b	a	b	a	b	a	b	b	b	a	b	b	b	b	a	a	b	a	b	b	a	b	a	a	a	a	b	b	a	b
ABMR_02A04	58.598	a	b	a	a	a	b	a	b	b	a	b	b	a	b	b	a	b	b	b	a	b	a	b	a	b	b	b	a	b	b	b	b	a	a	b	a	b	b	a	-	a	a	a	a	b	b	a	-
CAHMR_04B11*	60.215	b	b	a	a	a	b	a	b	b	a	b	b	a	b	b	a	b	b	b	a	b	a	b	a	b	b	b	a	b	b	b	b	a	a	b	a	b	b	a	b	a	a	a	a	b	b	a	b
CBBMR_13E15	60.215	b	b	a	a	a	b	a	b	b	a	b	b	a	b	b	a	b	b	b	a	b	a	b	a	b	b	b	a	b	b	b	b	a	a	b	a	b	b	a	b	a	a	a	a	b	b	a	b
ABMR_07E02	60.215	b	b	a	a	a	b	a	b	b	a	b	b	a	b	b	a	b	b	b	a	b	a	b	a	b	b	b	a	b	b	b	b	a	a	b	a	b	b	a	b	a	a	a	a	b	b	a	b
BHMR_12L14*	61.028	b	b	a	a	a	b	a	b	b	a	b	b	a	b	b	a	b	b	a	a	b	a	b	a	b	b	b	a	b	b	b	b	a	a	b	a	b	b	a	b	a	a	a	a	b	b	a	b
CAHMR_08A01*	65.822	b	b	a	a	a	b	a	b	b	a	b	b	a	b	b	b	b	b	a	a	b	a	b	a	b	b	b	a	b	b	b	b	a	a	b	a	b	b	a	b	a	a	a	a	b	b	a	b
ABMR_07K19**	67.297	b	b	a	a	b	b	a	b	b	a	b	b	a	a	b	b	b	b	a	a	b	a	b	a	b	b	b	a	b	b	b	b	a	a	b	a	b	b	a	b	a	a	a	a	b	b	a	b
ABMR_08E12**	67.297	b	b	a	a	b	b	a	b	b	a	b	b	a	a	b	b	b	b	a	a	b	a	b	a	b	b	b	a	b	b	b	b	a	a	b	a	b	b	a	b	a	a	a	a	b	b	a	b
ABMR_08E14**	67.297	b	b	a	a	b	b	a	b	b	a	b	b	a	a	b	b	b	b	a	a	b	a	b	a	b	b	b	a	b	b	b	b	a	a	b	a	b	b	a	b	a	a	a	a	b	b	a	b
AHMR_04H12**	69.803	b	b	a	a	b	b	a	b	b	a	b	b	a	a	b	b	b	b	a	a	b	a	a	a	b	b	b	b	b	b	b	b	a	a	b	a	b	b	a	b	b	a	a	a	b	b	a	b
AHMR_07C07**	69.803	b	-	-	a	b	b	-	b	b	a	b	b	-	a	b	b	b	b	a	a	b	a	a	a	b	-	b	b	b	-	b	-	a	a	b	a	b	b	a	b	b	a	a	a	b	b	a	b
CAHMR_08B05**	69.803	b	b	a	a	b	b	a	b	b	a	b	b	a	a	b	b	b	b	a	a	b	a	a	a	b	b	b	b	b	b	b	-	a	a	b	a	b	b	a	b	b	a	a	a	-	b	a	b
BHMR_10I12***	69.803	b	b	a	a	b	b	a	b	b	a	b	b	a	a	b	b	b	b	a	a	b	a	a	a	b	b	b	b	b	b	b	b	a	a	b	a	b	b	a	b	b	a	a	a	b	b	a	b
CBBMR_09M11****	70.231	b	b	a	a	b	b	a	b	b	a	b	b	a	a	b	b	b	b	a	a	b	a	a	a	b	b	b	b	b	b	b	b	a	-	b	a	b	b	a	b	b	a	a	a	b	b	a	b
CBBMR_16N02****	73.196	b	b	a	a	b	a	a	b	b	a	b	b	-	-	b	b	a	b	a	a	b	a	a	a	b	b	b	b	b	b	b	b	a	a	b	a	b	b	a	b	b	a	a	a	b	b	b	b
CABMR_07M23*	78.603	b	b	a	a	b	a	a	b	b	a	b	b	a	a	b	b	a	b	a	a	b	a	a	a	b	b	b	b	b	b	b	b	a	a	b	a	a	b	a	b	b	a	a	a	b	b	b	b
CAHMR_02G20*	78.603	b	b	a	a	b	a	a	b	b	a	b	b	a	a	b	b	a	b	a	a	b	a	a	a	b	b	b	b	b	b	b	b	a	a	b	a	a	b	a	b	b	a	a	a	b	b	b	b
AHMR_05N21*	78.603	b	b	a	a	b	a	a	b	b	a	b	b	a	a	b	b	a	b	a	a	b	a	a	a	b	b	b	b	b	b	b	b	a	a	b	a	a	b	a	b	b	a	a	a	b	b	b	b
BBMR_14J22	78.603	b	b	a	a	b	a	a	b	b	a	b	b	a	a	b	b	a	b	a	a	b	a	a	a	b	b	b	b	b	b	b	b	a	a	b	a	a	b	a	b	b	a	a	a	b	b	b	b
BBMR_15F08	78.603	b	b	a	a	b	a	a	b	b	a	b	b	a	a	b	b	a	b	a	a	b	a	a	a	b	b	b	b	b	b	b	b	a	-	b	a	a	b	a	b	b	a	a	a	b	b	b	b
CAHMR_03P06	78.603	b	b	a	a	b	a	a	b	b	a	b	b	a	a	b	b	a	b	a	a	b	a	a	a	b	-	b	b	-	-	b	b	a	a	b	a	a	b	a	b	b	a	a	a	b	b	b	b
BBMR_16A14	81.185	b	b	a	a	b	a	a	a	b	a	b	b	a	a	b	b	a	b	a	a	b	a	a	a	b	b	b	b	a	b	b	b	a	a	b	a	a	b	a	b	b	a	a	a	b	b	b	b
CAHMR_04F10	82.992	b	b	a	a	b	a	a	a	b	a	b	b	a	a	b	b	a	b	a	a	b	a	a	a	b	-	b	b	a	b	b	b	a	a	b	a	a	b	a	a	b	b	a	a	b	b	b	b
AHMR_01J11	87.348	b	b	a	a	b	a	a	a	b	a	b	b	a	a	b	b	a	b	a	a	b	a	a	a	a	b	b	b	a	b	b	b	a	a	b	a	a	a	b	a	b	b	b	a	b	b	b	a
BHMR_10I16	90.504	b	b	a	a	a	a	a	a	b	a	b	b	a	a	b	b	a	b	a	a	b	a	a	b	a	b	b	b	a	b	b	b	a	a	b	a	a	a	b	a	b	b	b	a	b	b	b	a
BHMR_13C01	94.175	b	b	a	a	a	a	a	a	b	a	b	b	a	a	b	b	a	b	a	a	b	a	a	b	a	b	b	b	a	b	b	b	a	a	b	a	a	a	b	a	b	b	b	a	-	-	b	a
BHMR_11D10	94.699	b	b	a	-	a	a	a	a	b	a	b	b	a	a	b	b	a	b	a	a	b	a	a	b	a	b	b	b	a	b	b	b	a	a	b	a	a	a	b	a	b	b	b	a	b	b	b	a
BBMR_14J17	95.365	b	b	a	a	a	a	a	a	b	a	b	b	a	a	b	b	a	b	a	a	b	a	a	b	a	b	b	b	a	b	b	b	a	a	b	a	a	a	b	a	b	b	b	a	b	b	b	a
CABMR_03F07	95.365	b	b	a	a	a	a	a	a	b	a	b	b	a	a	b	b	a	b	a	a	b	a	a	b	a	b	b	b	a	b	b	b	a	a	b	a	a	a	b	a	b	b	b	a	b	b	-	a
BHMR_15M22	96.208	b	b	a	a	a	a	a	a	b	a	b	b	a	a	b	b	a	b	a	a	b	a	a	b	a	b	b	b	a	b	b	b	a	a	b	a	a	a	b	a	b	b	b	a	b	b	b	a
CAHMR_03L03	96.208	b	b	a	a	a	a	a	a	b	a	b	b	a	a	b	b	a	b	a	a	b	a	a	b	a	-	b	b	a	b	b	b	a	a	b	a	a	a	b	a	b	b	b	a	b	b	b	a
CSTIE3	115.117	b	a	a	b	b	a	a	b	a	a	b	b	a	a	b	b	a	b	a	b	b	a	a	b	a	b	b	b	a	a	a	b	a	a	b	a	a	a	b	a	b	b	b	a	b	b	a	a
BHMR_10M22	117.025	b	a	a	b	b	a	a	b	a	a	b	b	a	a	b	b	a	b	a	b	b	a	a	b	a	b	b	b	a	a	a	b	a	a	b	a	a	a	b	a	b	b	b	a	b	b	a	a
group 5+10
AHMR_03J22	0	b	a	-	b	a	a	b	b	a	b	b	a	b	-	b	a	a	a	a	a	-	a	b	b	a	b	a	a	b	b	a	b	b	a	a	b	a	b	b	b	a	a	b	b	a	a	b	a
CABMR_04O10	30.101	b	a	b	a	b	b	b	b	a	b	a	b	b	a	b	b	b	a	a	a	a	a	a	a	a	b	a	b	b	b	b	b	b	b	b	b	a	b	a	a	b	a	b	b	a	a	b	a
AHMR_06P06	34.056	b	b	b	a	b	b	b	b	a	b	-	b	b	a	b	-	b	a	a	b	a	a	a	a	a	-	a	b	b	-	b	-	b	b	b	b	a	b	a	a	b	a	b	b	a	a	b	a
CBBMR_13O05	52.191	a	b	a	a	b	b	b	b	b	a	a	b	b	a	b	b	b	a	a	b	a	a	a	a	a	b	a	b	b	b	a	b	a	b	a	a	a	b	a	a	b	a	b	b	a	a	b	a
BBMR_10I21	52.854	a	b	a	a	b	b	b	b	b	a	a	b	b	a	b	b	b	a	a	b	a	a	a	a	a	b	a	b	b	b	a	b	a	b	a	a	a	b	a	a	b	a	b	b	b	a	b	a
BBMR_15O22	52.854	a	b	a	a	b	b	b	b	b	a	a	b	b	a	b	b	b	a	a	b	a	a	a	a	a	b	a	b	b	b	a	b	a	b	a	a	a	b	a	a	b	a	b	b	b	a	b	a
CBBMR_14O07	53.687	a	b	a	a	b	b	b	b	b	a	a	b	b	a	b	b	b	a	a	b	a	a	a	a	a	b	a	b	b	b	a	b	a	b	a	a	a	b	a	a	b	a	b	b	b	a	b	a
CBBMR_15B01	53.687	a	b	a	a	b	b	b	b	b	a	a	b	b	a	b	b	b	a	a	b	a	a	a	a	a	b	a	b	b	b	a	b	a	b	a	a	a	b	a	a	b	a	b	b	b	a	b	a
CBHMR_13P11	53.687	a	b	a	a	b	b	b	b	b	a	a	b	b	a	b	b	b	a	a	b	a	a	a	a	a	b	a	b	b	b	a	b	a	b	a	a	a	b	a	a	b	a	b	b	b	a	b	a
ABMR_07L15	53.687	a	b	a	a	b	b	b	b	b	a	a	b	b	a	b	b	b	a	a	b	a	a	a	a	a	b	a	b	b	b	a	b	a	-	a	a	a	b	a	a	b	a	b	b	b	a	b	a
CBHMR_15G12	53.687	a	b	a	a	b	b	b	b	b	a	a	b	b	a	b	b	b	a	a	b	a	a	a	a	a	b	a	b	b	b	a	b	a	b	a	a	a	b	-	a	b	a	b	b	b	a	b	a
AHMR_05N19	56.205	a	b	a	a	b	b	b	b	b	a	a	b	b	a	b	b	b	a	b	b	a	a	a	a	a	b	a	b	b	b	a	b	a	b	a	a	a	b	a	a	b	a	b	b	b	a	b	a
ABMR_02N17	56.96	a	b	a	a	b	b	b	b	b	a	b	b	b	a	b	b	b	a	b	b	a	a	a	a	a	b	a	b	b	b	a	b	a	b	a	a	a	b	a	a	b	a	b	b	b	a	b	a
ABMR_04G08	56.96	a	b	a	a	b	b	b	b	b	a	b	b	b	a	b	b	b	a	b	b	a	a	a	a	a	b	a	b	b	b	a	b	a	b	a	a	a	b	a	a	b	a	b	b	b	a	b	a
ABMR_07K21	56.96	a	b	a	a	b	b	b	b	b	a	b	b	b	a	b	b	b	a	b	b	a	a	a	a	a	b	a	b	b	b	a	b	a	b	a	a	a	b	a	a	b	a	b	b	b	a	b	a
AHMR_07L21	56.96	a	b	a	a	b	b	b	b	b	a	b	b	b	a	b	b	b	a	b	b	a	a	a	a	a	b	a	b	b	b	a	b	a	b	a	a	a	b	a	a	b	a	b	b	b	a	b	a
CBBMR_10J15	56.96	a	b	a	a	b	b	b	b	b	a	b	b	b	a	b	b	b	a	b	b	a	a	a	a	a	b	a	b	b	b	a	b	a	b	a	a	a	b	a	a	b	a	b	b	b	a	b	a
BHMR_15B01	56.96	a	b	a	a	b	b	b	b	b	a	b	b	b	a	b	b	b	a	b	b	a	a	a	a	a	b	a	b	b	b	a	b	a	b	a	a	a	b	a	a	b	a	b	b	b	a	b	a
BBMR_10M21	56.96	a	b	a	a	b	b	b	b	b	a	b	b	b	a	b	b	b	a	b	b	a	a	a	a	a	b	a	-	b	b	a	b	a	b	a	a	a	b	a	a	b	a	b	b	b	a	b	a
BHMR_13O07	56.96	a	b	a	a	b	b	b	b	b	a	b	b	b	a	b	b	b	a	b	b	a	a	a	a	a	b	a	b	b	-	a	b	a	b	a	a	a	b	a	a	b	a	b	b	b	a	b	a
AHMR_05C18	56.96	a	b	a	a	b	b	b	b	b	-	b	b	b	a	b	b	b	a	b	b	a	a	a	a	a	b	a	b	b	b	a	b	a	b	a	a	a	b	a	a	b	a	b	b	b	a	b	-
BHMR_10N16	56.96	a	b	a	a	b	b	b	b	b	a	b	b	b	a	b	b	b	a	b	b	a	a	a	-	a	b	a	b	b	-	a	b	a	b	a	a	a	b	a	a	b	a	b	b	b	a	b	a
BHMR_12A12	56.96	a	-	-	a	-	b	-	b	b	a	b	b	-	a	b	b	b	-	b	b	a	a	a	a	a	-	a	b	b	-	a	-	a	b	a	a	a	b	a	a	b	a	b	b	b	a	b	a
BBMR_14H09	56.96	a	b	a	a	b	b	b	b	b	a	b	b	b	a	b	b	b	a	b	b	a	a	a	a	a	b	a	b	b	b	a	b	a	b	a	a	a	b	a	a	b	a	b	b	-	a	b	a
BBMR_10A11	57.396	a	b	a	a	b	b	b	b	b	a	b	b	b	a	b	b	b	a	b	b	a	a	a	a	a	b	a	b	b	b	a	b	a	b	a	a	a	b	a	a	b	a	b	b	-	a	b	-
BBMR_09K18	57.578	a	b	a	a	b	b	b	b	b	a	b	b	a	a	b	b	b	a	b	b	a	a	a	a	a	b	a	b	b	b	a	b	a	b	a	a	a	b	a	a	b	a	b	b	b	a	b	a
BBMR_12C09	57.578	a	b	a	a	b	b	b	b	b	a	b	b	a	a	b	b	b	a	b	b	a	a	a	a	a	b	a	b	b	b	a	b	a	b	a	a	a	b	a	a	b	a	b	b	b	a	b	a
CBHMR_13G21	57.578	a	b	a	a	b	b	b	b	b	a	b	b	a	a	b	b	b	a	b	b	a	a	-	a	a	b	a	b	b	b	a	b	a	b	a	a	-	b	a	a	b	a	b	b	b	a	b	a
CABMR_02F15	57.637	a	b	a	a	b	b	b	b	b	a	a	b	b	a	b	b	b	a	b	b	a	a	a	a	a	b	a	b	b	b	a	b	a	b	a	a	a	b	a	a	b	a	b	b	b	a	b	a
CBHMR_12P05	57.637	a	b	a	a	b	b	b	b	b	a	a	b	b	a	b	b	b	a	b	b	a	a	a	a	a	b	a	b	b	b	a	b	a	b	a	a	a	b	a	a	b	a	b	b	b	a	b	a
Cag-0006	57.637	a	b	a	a	b	b	b	b	b	a	a	b	b	a	b	b	b	a	b	b	a	a	a	a	a	b	a	b	b	b	a	b	a	b	a	a	a	b	a	a	b	a	b	b	b	a	b	a
BHMR_10B16	57.637	a	b	a	a	b	b	b	b	b	a	a	b	b	a	b	b	b	a	b	b	-	a	a	a	a	b	a	b	b	b	a	b	a	b	a	a	a	b	a	a	b	a	b	b	b	a	b	a
BHMR_13B19	57.637	a	b	a	a	b	b	b	b	b	a	a	b	b	a	b	b	b	a	b	b	a	a	a	a	a	b	a	b	b	-	a	-	a	b	a	a	a	b	a	a	b	a	b	b	b	a	b	a
CAHMR_01H06	57.637	a	b	a	a	b	b	b	b	b	a	a	b	-	a	b	-	-	a	b	b	a	a	a	a	a	b	a	b	b	b	a	b	a	b	a	a	a	b	a	a	b	a	b	b	b	a	b	a
BBMR_09H13	58.179	a	b	a	a	b	b	b	b	b	a	b	b	b	a	b	b	b	a	b	b	a	a	a	a	a	b	a	b	b	b	a	b	a	b	a	a	a	b	a	a	b	a	b	b	b	a	b	a
BHMR_15P11	58.179	a	b	a	a	b	b	b	b	b	a	b	b	b	a	b	b	b	a	b	b	a	a	a	a	a	b	a	b	b	b	a	b	a	b	a	a	a	b	a	a	b	a	b	b	b	a	b	a
BHMR_11A10	58.179	a	b	a	a	b	b	b	b	b	a	b	b	b	a	b	b	b	-	b	b	a	a	a	a	a	b	a	b	b	b	a	b	a	b	a	a	a	b	a	a	b	a	b	b	b	a	b	a
CBHMR_10P03	58.603	a	b	a	a	b	b	b	b	b	a	b	b	b	a	b	b	b	a	b	b	a	a	a	a	a	b	a	b	b	b	a	b	a	b	a	a	a	b	a	a	b	a	b	b	b	a	b	a
BHMR_12C19	59.335	a	b	a	a	b	b	b	b	b	a	b	b	a	a	b	b	b	a	b	b	a	a	a	a	a	b	a	b	b	b	a	b	a	b	a	a	a	b	a	a	b	a	b	b	b	a	b	a
BHMR_15E04	59.335	a	b	a	a	b	b	b	b	b	a	b	b	a	a	b	b	b	a	b	b	a	a	a	a	a	b	a	b	b	b	a	b	a	b	a	a	a	b	-	a	b	a	b	b	b	a	b	a
BHMR_10C03	59.335	a	b	a	a	b	b	-	b	b	-	b	b	a	a	b	b	b	a	b	b	-	a	a	a	a	b	a	b	b	b	a	b	-	b	a	a	a	b	-	a	b	a	b	b	b	a	b	a
BBMR_10O10	60.919	a	b	a	a	b	b	b	b	b	a	b	b	a	a	b	b	b	a	b	b	a	a	a	a	a	b	a	b	b	b	a	b	a	b	a	a	a	b	a	a	b	a	b	b	b	a	b	a
CAHMR_03E19	61.792	a	b	a	a	b	-	b	b	b	a	b	b	a	a	b	b	b	a	b	b	a	a	a	a	a	b	a	b	b	b	a	b	a	b	a	a	a	b	a	a	b	a	b	b	b	a	-	a
BHMR_11J12	67.533	a	b	a	a	b	b	b	b	a	a	b	b	a	a	b	b	b	a	b	b	a	a	a	a	a	b	a	b	b	b	a	b	a	b	a	a	b	b	b	a	b	a	b	b	b	a	b	a
BHMR_09B01	67.533	a	b	a	a	b	b	b	b	a	a	b	b	a	a	b	b	b	a	b	b	a	a	a	a	a	b	a	b	b	b	a	b	a	b	a	a	b	b	b	a	b	a	b	b	b	a	b	a
AHMR_01M16	69.225	a	b	a	a	b	b	b	b	a	a	b	b	a	b	b	b	b	a	b	b	a	a	a	a	a	b	a	b	b	b	a	b	a	b	b	a	b	b	b	a	b	a	b	b	b	a	b	a
Cgca-0004	73.198	a	b	a	a	b	b	b	b	a	a	b	-	a	b	b	b	a	a	b	b	a	a	a	a	a	b	a	b	b	b	a	b	a	b	b	a	b	b	b	a	b	a	b	b	b	a	b	a
CBHMR_11I23*	76.728	a	b	a	a	b	b	b	b	a	a	b	b	a	b	b	b	a	a	b	b	a	-	a	a	a	b	-	b	b	b	a	b	a	b	b	a	b	b	b	a	b	a	b	b	a	a	b	a
BBMR_13L14	77.731	a	b	a	a	b	b	b	b	a	a	b	b	a	b	b	b	a	a	b	b	a	a	a	a	a	b	a	b	b	b	a	b	a	b	b	a	b	b	b	a	b	a	b	b	a	a	b	a
BBMR_09E22	77.731	a	b	a	a	b	b	b	b	a	a	b	b	a	b	b	b	a	a	b	b	a	a	a	a	a	b	a	b	b	b	a	b	a	b	b	a	b	b	b	a	b	a	b	b	a	a	b	a
CBHMR_12K23	77.731	a	b	a	a	b	b	b	b	a	a	b	b	a	b	b	b	a	a	b	b	a	a	a	a	a	b	a	b	b	b	a	b	a	b	b	a	b	b	b	a	b	a	b	b	a	a	b	a
AHMR_02K05	77.731	a	-	-	-	b	b	-	b	a	a	b	b	-	b	b	b	a	a	-	b	a	a	a	a	a	-	a	-	b	-	a	-	a	b	b	a	b	b	b	a	b	a	b	b	-	-	b	a
CABMR_08A19	78.99	a	b	a	a	b	b	b	b	a	a	b	b	a	b	a	b	a	a	b	b	a	a	a	a	a	b	a	b	a	b	a	b	a	b	b	a	b	b	b	a	b	a	b	b	a	a	b	a
BBMR_11C02	78.99	a	b	a	a	b	b	b	b	a	a	b	b	a	b	a	b	a	a	b	b	a	a	a	a	a	b	a	b	a	b	a	b	a	b	b	a	b	b	b	a	b	a	b	b	a	a	b	a
BBMR_15D18	78.99	a	b	a	a	b	b	b	b	a	a	b	b	a	b	a	b	a	a	b	b	a	a	a	a	a	b	a	b	a	b	a	b	a	b	b	a	b	b	b	a	b	a	b	b	a	a	b	a
CABMR_06I23	79.813	a	b	a	a	b	b	b	b	a	a	b	b	a	b	a	b	a	a	b	b	a	a	a	a	a	b	a	b	a	b	a	b	a	-	b	a	b	b	b	a	b	a	b	b	a	a	b	a
Ctcc-0006	83.094	a	b	b	a	b	b	b	b	a	a	b	b	a	b	a	b	a	a	b	b	a	a	a	a	a	b	a	b	a	b	a	b	a	b	b	a	b	b	b	a	b	a	b	b	a	a	b	a
BHMR_11E03	86.445	a	b	b	a	-	b	-	b	a	b	b	b	a	b	b	b	a	a	a	b	a	a	a	a	a	b	a	b	a	b	a	b	a	b	b	b	b	b	b	a	b	-	b	b	a	a	b	a
BBMR_13I13	89.249	a	b	b	a	b	b	b	b	a	b	b	b	a	b	b	b	a	a	a	b	a	a	a	a	a	b	a	b	a	b	a	b	a	b	b	b	b	b	b	a	b	a	b	b	a	a	b	a
ABMR_04L03	89.249	a	b	b	a	b	b	b	b	a	b	b	b	a	b	b	b	a	a	a	b	a	a	a	a	a	b	a	b	a	b	a	b	a	-	b	b	b	b	b	a	b	a	b	b	a	a	b	a
BBMR_13C01	89.956	a	b	b	a	b	b	b	b	a	b	b	b	-	b	b	b	a	a	a	b	a	a	a	a	-	b	a	b	a	b	a	b	a	b	b	b	b	b	b	a	b	b	b	b	a	a	b	a
CABMR_07I21	90.292	a	b	b	a	b	b	b	b	a	b	b	b	a	b	b	b	a	a	a	b	a	a	a	a	a	b	a	b	a	a	a	b	a	b	b	b	b	b	b	a	b	b	b	b	a	a	b	a
BBMR_15P24	90.292	a	b	b	a	b	b	b	b	a	b	b	b	a	b	b	b	a	a	a	b	a	a	a	a	a	b	a	b	a	a	a	b	a	b	b	b	b	b	b	a	b	b	b	b	a	a	b	a
CBBMR_16B15	91.065	a	b	b	a	b	b	b	b	a	b	b	b	a	b	b	a	a	a	a	b	a	a	a	a	a	b	a	b	a	a	a	b	a	b	b	b	b	b	b	a	b	b	b	b	a	a	b	a
CBHMR_16K21	91.065	a	b	b	a	b	b	b	b	a	b	b	b	a	b	b	a	a	a	a	b	a	a	a	a	a	b	a	b	a	a	a	b	a	b	b	b	b	b	b	a	b	b	b	b	a	a	b	a
ABMR_04L16	91.065	a	b	b	a	b	b	b	b	a	b	b	b	a	b	b	a	a	a	a	b	a	a	a	a	a	b	a	b	-	a	a	b	a	b	b	b	b	b	b	a	-	b	-	b	a	a	b	a
AHMR_08O10	94.238	a	b	b	a	b	b	b	b	b	b	b	b	a	b	b	a	a	a	a	b	a	a	a	a	a	b	a	b	a	b	a	b	a	b	b	b	b	b	b	a	b	b	b	b	a	a	b	a
BBMR_11P21	94.238	a	b	b	a	b	b	b	b	b	b	b	b	a	b	b	a	a	a	a	b	a	a	a	a	a	b	a	b	a	b	a	b	a	b	b	b	b	b	b	a	b	b	b	b	a	a	b	a
CBHMR_13M12	94.238	a	b	b	a	b	b	b	b	b	b	b	b	a	b	b	a	a	a	a	b	a	a	a	a	a	b	a	b	a	b	a	b	a	b	b	b	b	b	b	a	b	b	b	b	a	a	b	a
AHMR_04K19	94.238	a	b	b	a	b	b	b	b	b	b	b	b	a	b	b	a	a	a	a	b	a	a	a	a	a	b	a	b	a	-	a	b	a	b	b	b	b	b	b	a	b	b	b	b	a	a	b	a
AHMR_07J13	95.145	a	b	b	a	b	b	b	b	b	b	b	b	a	b	b	a	a	a	a	b	a	a	a	a	a	b	a	b	a	b	a	b	a	b	b	b	b	b	b	a	b	b	b	b	a	a	b	a
BHMR_15A07	97.675	a	b	b	a	b	b	b	b	b	b	b	b	a	b	b	a	a	a	a	b	a	a	a	a	a	b	a	b	a	b	a	b	a	b	b	b	b	b	b	a	b	b	b	b	a	a	b	a
BHMR_09A02*	97.675	-	b	b	a	b	b	b	b	b	b	b	b	a	b	b	a	a	a	a	b	a	-	-	a	a	b	a	b	a	b	a	b	a	b	b	b	b	b	b	a	b	b	b	b	-	-	b	a
BBMR_11H14	99.235	a	b	b	a	a	b	b	b	b	b	b	b	a	b	b	a	a	a	a	b	a	a	a	a	a	b	a	b	a	b	a	b	a	b	a	b	b	b	b	a	b	b	b	b	a	a	b	a
BHMR_13A23	99.235	a	b	b	a	a	b	b	b	b	b	b	b	a	b	b	a	a	a	a	b	a	a	a	a	a	b	a	b	a	b	a	b	a	b	a	b	b	b	b	a	b	b	b	b	a	a	b	a
BBMR_10K22	101.259	a	b	b	a	a	b	b	b	b	b	b	b	a	b	b	a	a	a	b	b	a	a	a	a	a	b	a	b	a	b	a	b	a	b	a	b	b	b	b	a	b	b	b	b	a	a	b	a
BHMR_13J02	101.259	a	b	b	a	a	b	b	b	b	b	b	b	a	b	b	a	a	a	b	b	a	a	a	a	a	b	a	b	a	b	a	b	a	b	a	b	b	b	b	a	b	b	b	b	a	a	b	a
AHMR_05J23	101.259	a	b	b	a	a	b	b	b	b	b	b	b	a	b	b	a	a	a	b	b	a	a	a	a	a	b	a	b	a	b	a	b	a	b	a	b	b	b	b	a	b	b	b	b	a	a	b	a
BBMR_10H20	101.96	a	b	b	a	a	b	b	b	b	b	b	b	a	b	b	a	a	a	a	b	a	a	a	a	a	b	a	b	a	b	a	b	a	b	a	b	b	b	b	a	b	b	b	b	a	a	b	a
ABMR_06M18	110.333	a	b	b	a	a	b	b	b	b	b	b	b	a	b	b	a	a	b	a	b	a	a	a	a	a	b	a	b	a	b	a	b	a	b	a	b	b	a	b	a	b	a	b	b	a	a	b	b
BHMR_16B16	116.058	a	b	b	a	a	b	b	b	b	b	a	b	a	b	b	a	a	b	a	b	a	a	a	a	a	b	a	b	a	b	b	b	a	b	a	b	b	b	b	b	b	a	b	b	a	a	b	b
BHMR_14J17	116.058	a	b	b	a	a	b	b	b	b	b	a	b	a	b	b	a	a	b	a	b	a	a	a	a	a	b	-	b	a	b	b	b	a	b	a	b	b	b	b	b	b	a	b	b	a	a	b	b
BHMR_09J04	116.837	a	b	b	a	a	b	b	b	b	b	a	b	a	b	b	a	a	b	a	a	a	a	a	a	a	b	a	b	a	b	b	b	a	b	a	b	b	b	b	b	b	a	b	b	a	a	b	b
BHMR_15C07	116.837	a	b	b	a	a	b	b	b	b	b	a	b	a	b	b	a	a	b	a	a	a	a	a	a	a	b	a	b	a	-	b	b	a	b	a	b	b	b	b	b	b	a	b	b	a	a	b	b
CABMR_02D17	116.837	a	b	b	a	a	b	b	b	b	b	a	b	a	b	b	a	a	b	a	a	a	a	a	a	a	b	a	b	a	b	b	b	a	b	a	b	b	b	b	b	b	a	b	b	a	a	b	b
BHMR_09B07	116.837	a	b	b	a	a	-	b	b	b	b	a	b	a	b	b	a	a	b	a	a	a	a	a	a	a	b	a	b	a	b	b	b	a	b	a	b	b	b	b	b	b	a	b	b	a	a	b	b
BHMR_09O19	116.837	a	b	b	a	a	b	b	b	b	b	a	b	a	b	b	a	a	b	a	a	a	a	a	a	a	b	a	b	a	b	b	b	a	b	a	b	b	b	b	b	b	a	b	b	a	a	b	b
CABMR_07P10	116.837	a	b	b	a	a	b	b	b	b	b	a	b	a	b	b	a	a	b	a	a	a	a	a	a	a	b	a	b	a	b	b	b	a	b	a	b	b	b	b	b	b	a	b	b	a	a	b	b
ABMR_04C16	120.018	b	b	b	a	a	b	b	b	b	b	a	b	a	b	b	a	a	b	b	a	a	a	a	a	a	b	a	b	a	b	b	b	a	b	a	b	b	b	b	b	b	a	b	b	a	a	b	b
BHMR_11J05	120.018	b	b	b	a	a	b	b	b	b	b	a	b	a	b	b	a	a	b	b	a	a	a	a	a	a	b	a	b	a	b	b	b	a	b	a	b	b	b	b	b	b	a	b	b	a	a	b	b
AHMR_08L03	120.018	b	b	b	-	a	b	b	b	b	b	a	b	a	b	b	a	a	b	b	a	a	a	a	a	a	b	a	b	a	b	b	b	a	b	a	b	b	b	b	b	b	a	b	b	a	a	b	b
CABMR_08J15	120.018	b	b	b	a	a	b	b	b	b	b	a	b	a	b	b	a	a	b	b	a	a	a	a	a	a	b	a	b	a	b	b	b	a	-	a	b	b	b	b	b	b	a	b	b	-	a	b	b
CBBMR_14C18	120.846	b	b	b	a	a	b	b	b	b	b	a	b	a	b	b	a	a	b	b	a	a	a	a	a	a	b	a	b	a	b	b	b	a	b	a	b	b	b	b	b	b	a	b	b	a	a	b	b
CBBMR_13M23	122.424	b	b	b	a	b	b	b	b	b	b	a	b	a	b	b	a	a	b	b	a	a	a	a	a	a	b	a	b	a	b	b	b	a	b	a	b	b	b	b	b	b	a	b	b	a	a	b	b
BHMR_15I20	124.01	b	b	b	a	b	b	b	b	b	b	a	b	a	b	b	a	a	b	b	-	a	b	a	a	a	-	a	b	-	b	b	-	a	b	a	b	b	b	b	b	b	a	b	-	a	a	b	b
CAHMR_03A23*	128.988	b	b	b	a	b	b	b	b	b	b	a	b	a	b	b	b	a	b	b	a	a	b	a	a	a	a	a	b	b	b	b	b	a	b	a	b	b	b	a	b	b	a	b	b	-	a	b	b
AHMR_06F15	128.988	b	b	-	a	b	b	b	b	b	b	a	b	a	b	b	b	a	b	b	a	a	b	a	a	a	a	a	b	b	b	b	b	a	b	a	-	b	b	-	b	b	a	b	b	a	a	b	b
CAHMR_07K01	136.747	b	b	a	a	b	b	b	a	b	b	a	b	a	b	b	b	a	b	b	a	a	b	a	b	a	a	a	b	b	b	b	a	a	b	a	b	b	b	a	b	b	a	b	a	a	a	b	b
ABMR_04H01	136.747	b	b	a	a	b	b	b	a	b	b	a	b	a	b	b	b	a	b	b	a	a	b	a	b	a	a	a	b	b	b	b	a	a	-	a	b	b	b	a	b	b	a	b	a	a	a	b	b
CABMR_08O18	141.818	b	b	a	a	b	b	b	a	b	b	a	b	a	b	a	b	a	b	b	a	a	b	a	b	a	a	a	a	b	b	a	a	a	b	a	b	b	b	a	b	b	a	b	a	a	a	b	b
BBMR_16B06	141.818	b	b	a	a	b	b	b	a	b	b	a	b	a	b	a	b	a	b	b	a	a	b	a	b	a	a	a	a	b	b	a	a	a	b	a	b	b	b	a	b	b	a	b	a	a	a	b	b
AHMR_08N08	141.818	b	b	a	a	b	b	b	a	b	b	a	b	a	b	a	b	a	b	b	a	a	b	-	b	a	a	a	a	b	b	a	a	a	b	a	b	b	b	a	b	b	a	b	a	a	a	b	b
CABMR_03I08	142.586	b	b	a	a	b	b	b	a	b	b	a	b	a	b	a	b	a	b	b	a	a	b	a	b	a	a	a	a	b	b	a	a	a	b	a	b	b	b	a	b	b	a	b	a	a	a	b	b
BHMR_10L08	142.586	b	b	a	a	b	b	b	a	b	b	a	b	a	b	a	b	a	b	b	a	a	b	a	b	a	a	a	a	b	b	a	a	a	b	a	b	b	b	a	b	b	a	b	a	a	a	b	b
ABMR_03P05	144.883	b	b	a	a	b	b	b	a	b	b	a	b	a	b	a	b	a	b	b	a	a	b	a	b	a	a	a	a	b	b	a	a	a	b	a	b	b	b	a	b	b	a	b	a	a	a	b	b
CABMR_07P14	149.999	b	b	a	a	b	b	b	a	b	b	a	b	a	b	a	b	a	b	b	a	a	b	a	b	a	a	a	a	b	b	a	a	a	b	a	b	b	b	a	b	b	a	b	a	a	a	b	b
BHMR_14N15	149.999	b	b	a	a	b	b	b	a	b	b	a	b	a	b	a	b	a	b	b	a	a	b	a	b	a	a	a	a	b	b	a	a	a	b	a	b	b	b	a	b	b	a	b	a	a	a	b	b
ABMR_08P02	153.418	b	b	a	a	b	b	b	a	b	b	a	b	a	b	a	b	a	b	b	a	a	b	a	b	a	a	a	a	b	b	a	a	a	a	a	b	b	b	a	b	b	a	b	a	a	a	b	b
CAHMR_03H08	157.715	b	b	a	a	b	b	b	a	b	b	b	a	a	b	a	b	a	b	b	a	a	b	a	b	a	a	a	a	b	b	a	a	a	a	a	b	-	b	a	b	b	a	b	a	a	a	b	b
AHMR_06M24	167.076	b	b	a	a	b	b	b	a	b	b	b	a	a	b	a	b	b	b	b	b	a	b	a	b	a	a	a	a	b	b	a	b	a	a	a	b	b	b	a	b	b	a	a	a	a	a	a	b
CAHMR_04I09	167.789	b	b	a	a	b	b	b	a	b	b	b	a	a	b	a	b	b	b	b	b	a	b	a	b	a	a	a	a	b	b	a	b	a	a	a	b	b	b	a	b	b	a	a	a	a	a	a	b
CHMR_14L04	175.744	b	b	b	a	a	b	b	a	a	b	b	a	a	b	a	b	b	b	b	b	a	b	a	b	a	a	a	a	b	b	a	b	-	a	b	b	a	b	a	b	a	a	a	a	a	a	a	b
CHMR_13P21	175.744	b	b	b	a	a	b	b	a	a	b	b	a	a	b	a	b	b	b	b	b	a	b	a	b	a	a	a	a	b	b	a	b	-	a	b	b	a	b	a	b	a	a	a	a	a	a	a	b
BHMR_10L20	196.336	b	b	b	a	a	b	b	b	a	a	b	a	a	a	a	b	b	a	b	b	a	a	b	a	a	b	a	-	b	a	a	b	a	a	b	b	-	b	a	b	a	b	a	a	-	b	a	b
BHMR_14J18	197.305	b	b	b	a	a	b	b	b	a	a	b	a	a	a	a	b	b	a	b	b	a	a	b	a	a	b	a	b	b	a	a	b	a	a	b	b	a	b	a	b	a	b	a	a	a	b	a	b
group 6
BBMR_14B07	0	b	a	b	b	a	a	b	b	a	b	b	a	a	b	b	b	b	b	a	b	b	a	a	a	a	a	b	b	a	a	a	a	a	a	b	a	b	a	b	b	a	b	a	a	b	a	b	b
ABMR_04P14	17.674	-	b	b	b	a	a	b	b	a	b	b	a	a	a	b	-	b	b	a	b	b	a	a	b	a	a	a	b	a	a	a	a	a	a	b	a	a	a	b	b	a	b	a	a	a	a	b	b
ABMR_03N05	37.552	a	b	b	b	b	a	b	b	a	a	a	a	b	a	a	a	b	b	a	a	b	b	a	b	a	a	a	b	a	a	a	a	a	b	b	a	a	b	b	b	b	a	a	a	b	b	b	b
ABMR_04F08	37.552	a	b	b	b	b	a	b	b	a	a	a	a	b	a	a	a	b	b	a	a	b	b	a	b	a	a	a	b	a	a	a	a	a	b	b	a	a	b	b	b	b	a	a	a	b	b	b	b
ABMR_06N18	37.552	a	b	b	b	b	a	b	b	a	a	a	a	b	a	a	a	b	b	a	a	b	b	a	b	a	a	a	b	a	a	a	a	a	b	b	a	a	b	b	b	b	a	a	a	b	b	b	b
ABMR_07N22	37.552	a	b	b	b	b	a	b	b	a	a	a	a	b	a	a	a	b	b	a	a	b	b	a	b	a	a	a	b	a	a	a	a	a	b	b	a	a	b	b	b	b	a	a	a	b	b	b	b
AHMR_04F23	37.552	a	b	b	b	b	a	b	b	a	a	a	a	b	a	a	a	b	b	a	a	b	b	a	b	a	a	a	b	a	a	a	a	a	b	b	a	a	b	b	b	b	a	a	a	b	b	b	b
ABMR_07E05	37.552	a	b	b	b	b	a	b	b	a	a	a	a	b	a	a	a	b	b	a	a	b	b	a	b	a	a	a	b	a	a	a	a	a	b	b	a	a	b	b	b	b	a	a	a	b	b	b	b
ABMR_07G03	37.552	a	b	b	b	b	a	b	b	a	a	a	a	b	a	a	a	b	b	a	a	b	b	a	b	a	a	a	b	a	a	a	a	a	b	b	a	a	b	b	b	b	a	a	a	b	b	b	b
AHMR_05G06	37.552	a	b	b	b	b	a	b	b	a	a	a	a	b	a	a	a	b	b	a	a	b	b	a	b	a	a	a	b	a	a	a	a	a	b	b	a	a	b	b	b	b	a	a	a	b	b	-	b
BBMR_10I05	37.552	a	b	b	b	b	a	b	b	a	a	a	a	b	a	a	a	b	b	a	a	b	b	a	b	a	a	a	b	a	a	a	a	a	b	b	a	a	b	b	b	b	a	a	a	b	b	b	b
AHMR_03O19	37.552	a	b	b	b	b	a	b	b	a	a	a	a	b	a	a	a	b	b	a	a	-	b	a	b	a	a	a	b	a	a	a	a	a	b	b	a	a	b	b	b	b	a	a	a	b	b	b	b
BHMR_12P22	37.994	a	b	b	b	b	a	b	b	a	a	a	a	b	a	a	a	b	b	a	a	b	b	a	b	a	a	a	b	a	a	a	a	a	b	b	a	a	b	b	b	b	a	a	a	b	b	b	b
CABMR_05H23	37.994	a	b	b	b	b	a	b	-	a	a	a	a	b	a	a	a	b	-	a	a	b	b	a	b	a	a	a	b	a	a	a	a	a	b	b	a	a	b	b	b	b	a	a	a	b	b	b	b
AHMR_06H10	40.103	a	-	-	b	b	a	-	b	a	a	a	a	-	a	a	a	b	b	a	a	b	b	a	b	a	-	a	b	a	-	a	-	a	b	b	a	a	b	b	-	b	a	a	a	b	b	b	b
CBBMR_09B23	50.782	a	b	a	b	b	a	b	b	a	a	a	a	b	a	a	a	b	b	a	a	b	b	a	b	a	b	a	b	a	a	a	a	a	b	b	a	a	b	b	b	b	a	a	a	b	b	b	b
BHMR_10K10	53.255	a	b	a	b	b	a	b	b	a	a	a	a	b	a	a	a	b	b	a	a	b	b	a	b	a	b	a	b	a	a	a	a	a	b	b	a	a	b	b	b	b	a	a	a	b	b	b	b
AHMR_08M24	54.054	a	b	a	b	b	a	b	b	a	a	a	a	b	a	a	a	b	b	a	a	b	b	a	b	a	b	a	b	a	a	a	a	a	b	b	a	a	b	b	b	b	a	a	a	b	b	b	b
BHMR_15K12	54.054	a	b	a	b	b	a	b	b	a	a	a	a	b	a	a	a	b	b	a	a	b	b	a	b	a	b	a	b	a	a	a	a	a	b	b	a	a	b	b	b	b	a	a	a	b	b	b	b
ABMR_02P03	54.485	a	b	a	b	b	a	b	b	a	a	a	a	b	a	a	a	b	b	a	a	b	b	a	b	a	b	a	b	a	a	a	a	a	b	b	a	a	b	b	b	b	a	a	a	b	b	b	b
ABMR_05A04	54.485	a	b	a	b	b	a	b	b	a	a	a	a	b	a	a	a	b	b	a	a	b	b	a	b	a	b	a	b	a	a	a	a	a	b	b	a	a	b	b	b	b	a	a	a	b	b	b	b
BHMR_16L04	54.485	a	b	a	b	b	a	b	b	a	a	a	a	b	a	a	a	b	b	a	a	b	b	a	b	a	b	a	b	a	a	a	a	a	b	b	a	a	b	b	b	b	a	a	a	b	b	b	b
CAHMR_06D05	54.485	a	b	-	b	b	a	b	b	a	a	a	a	b	a	a	a	b	b	a	a	b	b	a	b	a	b	a	b	a	a	a	a	a	b	b	a	a	b	b	b	b	a	a	a	b	b	b	b
ABMR_07O07	54.485	a	b	a	b	b	a	b	b	a	a	a	a	b	a	a	a	b	b	a	a	b	b	a	b	a	b	a	b	a	a	a	a	a	-	b	a	a	b	b	b	b	a	a	a	-	b	b	b
BBMR_12B11	54.485	a	b	a	b	b	a	b	b	a	a	a	a	b	a	a	a	b	b	a	a	b	b	a	b	a	b	-	b	a	a	a	a	a	b	b	a	a	b	b	b	b	a	a	a	b	b	b	b
BHMR_09B21	55.839	a	b	a	b	b	a	b	b	a	a	a	a	b	a	a	a	b	b	a	a	b	b	b	b	a	b	a	b	a	a	a	a	a	b	b	a	a	b	b	b	b	a	a	a	b	b	b	b
AHMR_03O06	56.582	a	b	a	b	b	a	b	b	a	a	a	a	b	a	a	a	b	b	a	a	b	b	b	b	a	b	a	b	a	a	a	a	a	b	b	a	a	b	b	b	b	a	a	a	b	b	b	b
BHMR_15G21	56.582	a	b	a	b	b	a	b	b	a	a	a	a	b	a	a	a	b	b	a	a	b	b	b	b	a	b	a	b	a	a	a	a	a	b	b	a	a	b	b	b	b	a	a	a	b	b	b	b
BBMR_14P14*	57.546	a	-	a	b	b	a	b	b	a	a	a	a	b	a	a	a	b	b	a	a	b	b	b	b	a	b	a	b	a	a	a	a	a	b	b	a	a	b	b	b	-	a	a	a	b	b	b	b
ABMR_01B08	61.695	a	b	a	b	b	a	a	b	a	a	a	a	b	a	a	a	b	b	a	a	b	b	b	b	a	b	a	b	a	a	a	a	a	b	b	a	a	b	b	b	b	a	a	a	b	b	b	b
AHMR_03D06	61.695	a	b	a	-	b	a	a	b	a	a	a	a	-	a	a	a	b	b	a	a	b	b	b	b	a	b	a	b	a	a	a	a	a	b	b	a	a	b	b	b	b	a	a	a	b	b	b	b
CABMR_01K22	62.315	a	b	a	b	b	a	a	b	a	a	a	a	b	b	a	a	b	b	a	a	b	b	b	b	a	b	a	b	a	a	a	a	a	b	b	a	a	b	b	b	b	a	a	a	b	b	b	b
BHMR_16B20	62.315	a	b	a	b	b	a	a	b	a	a	a	a	b	b	a	a	b	b	a	a	b	b	b	b	a	b	a	b	a	a	a	a	a	b	b	a	a	b	b	b	b	a	a	a	b	b	b	b
BHMR_14D24	62.315	a	b	a	b	b	a	a	b	a	a	a	a	b	b	a	a	b	b	a	a	b	b	b	b	a	b	a	b	a	a	a	a	a	b	b	a	a	b	b	b	b	a	a	a	-	-	b	b
CBHMR_13J08	62.658	a	b	a	a	b	a	a	b	a	a	a	a	b	b	a	a	b	b	a	a	b	b	b	b	a	b	a	b	a	a	a	a	a	b	b	a	a	b	b	b	b	a	a	a	b	b	b	b
BHMR_13B05	62.658	a	b	a	a	-	a	a	b	a	a	a	a	b	-	a	a	b	b	a	a	b	b	b	b	a	b	a	b	a	a	a	a	a	b	b	a	a	b	b	b	b	a	a	a	b	b	b	b
AHMR_08P08	62.658	a	b	a	-	b	a	a	b	a	a	a	a	-	b	a	a	b	b	a	a	b	b	b	b	a	b	a	b	a	a	a	a	a	b	b	a	a	b	b	b	b	a	a	a	b	-	b	b
CBHMR_12B09	63.501	a	b	a	b	b	a	a	b	a	a	a	a	b	b	a	a	b	a	a	a	b	b	b	b	a	b	a	b	a	a	a	a	a	b	b	a	a	b	b	b	b	a	a	a	b	b	b	b
BBMR_15D10	63.501	a	b	a	b	b	a	a	b	a	a	a	a	b	b	a	a	b	a	a	a	b	b	b	b	a	b	a	b	a	a	a	a	a	b	b	a	a	b	b	b	b	a	a	a	b	b	b	b
CBHMR_09M13	66.003	a	b	a	b	b	a	a	b	a	a	-	a	b	b	a	a	b	a	a	a	b	b	b	b	a	b	a	b	a	a	a	a	a	b	b	a	a	b	b	b	b	a	b	a	b	b	b	a
BBMR_11A02	69.086	a	b	a	b	b	a	a	b	a	a	a	b	b	b	a	a	a	a	a	a	b	b	b	b	a	b	a	b	a	a	a	a	a	b	b	a	a	b	b	b	b	a	b	a	b	b	b	a
BHMR_13H09	69.086	a	b	a	b	b	a	a	b	a	a	a	b	b	b	a	a	a	a	a	a	b	b	b	b	a	b	a	b	a	a	a	a	a	b	b	a	a	b	b	b	b	a	b	a	b	b	b	a
AHMR_01F17	69.086	a	b	a	b	b	a	a	b	a	a	a	b	b	b	a	a	a	a	a	a	b	b	b	b	a	b	a	b	a	a	a	a	a	b	b	a	a	b	b	b	b	a	b	a	b	-	b	a
AHMR_03K08	69.086	a	-	-	b	b	a	-	b	a	a	a	b	-	b	a	a	a	a	a	a	b	b	b	b	a	-	a	b	a	a	a	-	a	b	b	a	a	b	b	b	b	a	b	-	b	b	b	a
CBHMR_14F15	69.9	a	b	b	b	b	a	a	b	a	a	a	b	b	b	a	a	a	a	a	a	b	b	b	b	a	b	a	b	a	a	a	a	a	b	b	a	a	b	b	b	b	a	b	a	b	b	b	a
CBHMR_10G18	69.9	a	b	b	b	b	a	a	b	a	a	a	b	b	b	a	a	a	a	a	a	b	b	b	b	a	b	a	b	a	a	a	a	a	b	b	a	a	b	b	b	b	a	b	a	b	b	b	a
BHMR_13B10	69.9	a	b	b	b	b	a	a	b	a	a	-	b	b	b	a	a	-	a	a	a	b	b	b	b	a	-	a	b	a	a	a	a	a	b	b	a	a	b	b	b	b	a	b	-	b	b	b	a
CBBMR_14D07*	70.723	a	b	b	b	b	a	a	b	a	a	a	b	b	b	a	a	a	a	a	a	b	b	b	b	a	b	a	b	a	a	a	a	a	b	b	a	a	b	b	b	b	a	b	a	b	b	b	a
CBBMR_14G17*	70.723	a	b	b	b	b	a	a	b	a	a	a	b	b	b	a	a	a	a	a	a	b	b	b	b	a	b	a	b	a	a	a	a	a	b	b	a	a	b	b	b	b	a	b	a	b	b	b	a
AHMR_08H13	70.723	a	b	b	b	b	a	a	b	a	a	a	b	b	b	a	a	a	-	a	a	b	b	b	b	a	b	a	b	a	a	a	a	a	b	b	a	a	b	b	b	b	a	b	a	b	b	b	a
BBMR_16J04	70.723	a	b	b	b	b	a	a	b	a	a	a	b	b	b	a	a	a	a	a	a	b	b	b	-	a	b	a	b	a	a	a	a	a	b	b	a	a	b	b	b	b	a	b	a	b	b	b	a
ABMR_08M18	75.658	a	b	b	b	b	a	a	b	a	a	a	b	b	b	a	a	a	a	b	a	b	b	b	b	a	b	a	-	a	a	a	a	b	b	b	a	b	b	b	b	b	a	b	a	b	b	b	a
BHMR_16N23	75.658	a	b	b	b	b	a	a	b	a	a	a	b	b	b	a	a	a	a	b	a	b	b	b	b	a	b	a	b	a	a	a	a	b	b	b	a	b	b	b	b	b	a	b	a	b	b	b	a
BHMR_13M20	75.658	a	b	b	b	b	a	a	b	a	a	a	b	b	b	a	a	a	a	b	a	b	b	b	b	a	b	a	b	a	a	a	a	b	b	b	a	b	b	b	b	b	a	b	a	b	b	b	a
BBMR_13B22	75.658	a	b	b	b	b	a	a	b	a	a	a	b	b	b	a	a	a	a	b	a	b	b	b	b	a	b	a	b	a	a	a	a	b	b	b	a	b	b	b	b	b	a	b	-	b	b	b	a
CAHMR_03A06	76.59	a	b	b	b	b	a	a	b	a	a	a	b	b	b	a	a	a	a	b	a	b	b	b	b	a	b	b	b	a	a	a	a	b	b	b	a	b	b	b	b	b	a	b	a	b	b	b	a
BBMR_12O23	80.488	a	b	b	b	b	a	a	b	a	a	a	b	b	b	a	a	a	a	b	a	b	b	a	b	a	b	b	a	a	a	b	a	b	b	b	a	b	b	b	b	b	a	b	a	b	b	b	a
CBBMR_14E05	82.098	a	b	b	b	b	a	a	b	a	a	a	b	b	b	a	a	a	a	b	a	b	b	a	b	a	b	-	a	a	a	b	a	b	b	b	a	b	b	b	b	b	a	-	a	b	b	b	a
CHMR_09K21	82.8	a	b	b	b	b	a	a	b	a	a	a	b	b	-	a	a	a	a	b	a	b	b	-	b	a	b	b	a	a	a	b	a	b	b	b	a	b	b	-	b	b	a	b	a	b	b	b	a
BBMR_14P05	83.83	a	b	b	b	b	a	a	b	a	a	a	b	b	b	a	a	a	a	b	a	b	b	a	b	a	b	b	a	a	a	b	a	-	b	b	a	b	b	b	b	b	a	b	-	-	b	b	a
BHMR_16O24	83.83	a	b	b	b	b	a	a	b	a	a	a	b	b	b	a	a	a	a	b	a	b	b	a	b	a	b	b	a	a	a	b	a	-	b	b	a	b	b	b	b	b	a	b	a	b	b	b	a
BBMR_14F23	84.598	a	b	b	b	b	a	a	b	a	a	a	b	b	b	a	a	a	a	b	a	a	b	a	b	a	b	b	a	a	a	b	a	b	b	b	a	b	b	b	b	b	a	b	a	b	b	b	a
BBMR_14G12	84.598	a	b	b	b	b	a	a	b	a	a	a	b	b	b	a	a	a	a	b	a	a	b	a	b	a	b	b	a	a	a	b	a	b	b	b	a	b	b	b	b	b	a	b	a	b	b	b	a
AHMR_01C04	84.598	a	b	b	b	b	a	a	b	a	a	a	b	b	b	a	a	a	a	-	a	a	b	a	b	a	b	b	a	a	a	b	a	b	b	b	a	b	b	b	b	b	a	b	a	-	b	b	a
ABMR_03P21	86.275	a	b	b	b	b	a	a	b	a	a	a	b	b	b	a	a	a	a	b	a	a	b	a	b	a	b	b	a	a	a	b	a	b	b	b	a	b	b	b	b	b	a	b	a	b	b	b	a
ABMR_07J21	86.275	a	b	b	b	b	a	a	b	a	a	a	b	b	b	a	a	a	a	b	a	a	b	a	b	a	b	b	a	a	a	b	a	b	b	b	a	b	b	b	b	b	a	b	a	b	b	b	a
CABMR_08I02	86.275	a	b	b	b	b	a	a	b	a	a	a	b	b	b	a	a	a	a	b	a	a	b	a	b	a	b	b	a	a	a	b	a	b	b	b	a	b	b	b	b	b	a	b	a	b	b	b	a
BBMR_13J02	90.761	a	b	b	b	b	a	a	b	a	a	a	b	b	b	a	a	a	a	a	a	a	b	a	b	a	b	b	a	a	a	b	a	b	b	b	a	b	b	b	b	b	a	b	a	b	b	b	a
AHMR_05N17	91.504	a	b	b	b	b	a	b	b	a	a	a	b	b	b	a	a	a	a	a	a	a	b	a	b	a	b	b	a	a	a	b	a	b	b	b	a	b	b	b	b	b	a	b	a	b	b	b	a
BHMR_13J05	91.504	a	b	b	b	b	a	b	b	a	a	a	b	b	b	a	a	a	a	a	a	a	b	a	b	a	b	b	a	a	a	b	a	b	b	b	a	b	b	b	b	b	a	b	a	b	b	b	a
BBMR_16D12	91.504	a	b	b	b	b	a	b	b	a	a	a	b	b	b	a	a	a	a	a	a	a	b	a	b	a	b	b	a	a	a	b	a	b	b	b	a	b	b	b	b	b	a	b	a	b	b	b	a
CBHMR_15K10	95.088	a	b	b	b	b	a	b	b	a	a	a	b	b	b	a	a	a	a	a	a	a	b	a	b	a	b	b	a	a	a	b	a	b	b	b	a	b	b	b	b	b	a	b	a	b	b	b	a
CBBMR_16M02	96.336	a	b	b	b	b	a	b	b	a	a	a	b	b	b	a	a	a	a	a	a	a	b	a	b	a	b	b	a	a	a	b	a	b	b	b	a	b	b	b	b	b	a	b	a	b	b	b	a
CABMR_02A02	97.834	a	b	b	b	b	a	b	b	a	a	a	b	b	b	a	a	a	a	a	a	a	b	a	b	a	b	b	a	a	a	b	a	a	b	b	a	b	b	b	b	b	a	b	a	b	b	b	a
CABMR_03C01	104.73	a	b	b	b	b	a	b	b	a	a	b	b	b	b	a	a	a	a	a	a	a	b	a	b	a	b	a	a	b	a	b	a	a	b	b	a	b	b	b	b	b	a	b	a	b	b	b	a
CABMR_01A17	111.674	a	b	b	b	b	a	b	b	a	a	b	b	b	a	a	a	a	a	a	a	a	a	a	b	a	b	a	b	b	a	b	a	a	b	b	a	b	b	b	b	b	a	b	a	a	b	b	a
CABMR_03C15	111.674	a	b	b	b	b	a	b	b	a	a	b	b	b	a	a	a	a	a	a	a	a	a	a	b	a	b	a	b	b	a	b	a	a	b	b	a	b	b	b	b	b	a	b	a	a	b	b	a
BBMR_15B07	111.674	a	b	b	b	b	a	b	b	a	a	b	b	b	a	a	a	a	a	a	a	a	a	a	b	a	b	a	b	b	a	b	a	a	b	b	a	b	b	b	b	b	a	b	a	a	b	b	a
AHMR_05D13	111.674	a	b	b	b	-	a	b	b	a	a	b	b	b	a	a	a	a	a	a	a	a	a	a	b	a	b	a	b	b	a	b	a	a	b	b	a	b	b	b	b	b	a	b	a	a	b	b	a
BBMR_12B06	114.134	a	b	b	b	b	a	b	b	a	a	b	b	b	a	a	a	a	a	a	a	a	a	a	b	a	b	a	b	b	a	b	a	a	b	b	a	b	b	b	b	b	a	b	a	a	b	b	a
BHMR_16M11	119.282	a	b	b	b	b	a	b	b	a	a	b	b	b	a	a	b	a	a	a	a	a	a	a	b	a	b	a	b	b	a	b	a	a	b	b	a	b	b	b	b	b	a	b	a	a	b	b	a
BHMR_15K16	126.053	a	b	a	b	b	a	b	b	b	a	b	b	b	a	a	b	a	a	a	a	a	a	a	b	a	b	a	b	b	a	b	a	a	b	b	a	b	a	b	b	b	a	b	a	a	b	b	a
BHMR_16L23	126.053	a	b	a	b	b	a	b	b	b	a	b	b	b	a	a	b	a	a	a	a	a	a	a	b	a	b	a	b	b	a	b	a	a	b	b	a	b	a	b	b	b	a	b	a	a	b	b	a
BBMR_14F17	131.372	b	b	a	b	b	a	b	b	b	a	b	b	b	a	a	b	a	a	a	b	a	a	a	b	a	b	a	b	b	a	b	a	a	b	b	a	b	a	b	a	b	a	b	b	a	b	b	a
CBHMR_11I20	139.037	b	a	a	b	b	a	b	b	b	a	b	b	b	b	a	b	a	a	a	b	a	a	a	a	a	b	a	a	b	a	b	b	a	b	b	a	b	a	b	a	b	a	b	b	a	b	b	a
BHMR_11M23	142.358	b	a	a	b	b	a	b	b	b	a	b	b	b	b	a	b	a	a	a	b	a	a	b	a	a	b	a	a	b	a	b	b	a	b	b	a	b	a	b	a	b	a	b	b	a	b	b	a
BHMR_16N24	144.036	b	a	a	b	b	a	b	b	b	a	b	b	b	b	a	b	a	a	a	b	a	a	b	a	a	b	a	a	b	a	b	b	a	b	b	a	b	a	b	a	b	a	b	b	a	b	b	a
BHMR_10M18	144.036	b	a	a	b	b	a	b	b	b	a	b	b	b	b	a	b	a	a	a	b	a	a	b	a	a	b	a	a	b	a	b	-	a	b	b	a	b	a	b	a	b	a	b	b	a	b	b	a
BHMR_12P06	144.036	b	a	a	b	b	a	b	b	b	a	b	b	b	b	a	b	a	a	a	b	a	a	b	a	a	b	a	a	b	a	b	b	a	b	b	a	b	a	b	a	b	a	b	b	a	b	b	a
CAHMR_01A18	144.865	b	a	a	b	b	a	b	b	b	a	b	b	b	b	a	b	a	a	b	b	a	a	b	a	a	b	a	a	b	a	b	b	a	b	b	a	b	a	b	a	b	a	b	b	a	b	b	a
CBHMR_11E19	144.865	b	a	a	b	b	a	b	b	b	a	b	b	b	b	a	b	a	a	b	b	a	a	b	a	a	b	a	a	b	a	b	b	a	b	b	a	b	a	b	a	b	a	b	b	a	b	b	a
CBHMR_12O06	144.865	b	a	a	b	b	a	b	b	b	a	b	b	b	b	a	b	a	a	b	b	a	a	b	a	a	b	a	a	b	a	b	b	a	b	b	a	b	a	b	a	b	a	b	b	a	b	b	a
CBHMR_12P18	144.865	b	a	a	b	b	a	b	b	b	a	b	b	b	b	a	b	a	a	b	b	a	a	b	a	a	b	a	a	b	a	b	b	a	b	b	a	b	a	b	a	b	a	b	b	a	b	b	a
CBHMR_11F16	144.865	b	a	a	b	b	a	b	b	b	a	b	b	b	b	a	b	a	a	b	b	a	a	b	a	a	b	a	a	b	-	b	b	a	b	b	a	b	a	b	a	b	a	b	b	a	b	b	a
CABMR_04F22*	150.09	b	a	a	b	b	a	b	b	b	-	b	b	b	b	a	b	a	b	b	b	a	b	b	a	a	b	a	a	b	a	b	b	a	b	b	a	b	a	b	a	b	a	b	b	a	b	b	-
group 7
ABMR_01H12	0	b	a	a	b	b	a	b	b	a	a	b	b	b	a	a	b	b	b	a	a	a	a	a	b	b	b	a	b	b	a	a	a	b	b	a	b	a	a	b	b	b	a	a	a	a	a	b	b
BBMR_12J10	1.791	b	a	a	b	b	a	b	b	a	a	b	b	b	a	a	b	b	b	a	a	a	a	a	b	b	b	a	b	b	a	a	a	b	b	a	b	a	a	b	b	b	a	a	a	a	a	b	b
CAHMR_03J23*	20.521	b	a	b	a	a	a	a	b	a	a	b	a	a	a	a	a	a	b	b	a	a	a	a	a	a	b	a	b	b	b	b	a	b	b	b	b	a	a	b	b	b	a	a	-	a	a	b	b
CAHMR_08O04**	21.077	b	a	b	a	a	a	a	b	a	a	b	a	a	a	a	a	a	b	b	a	a	a	a	a	a	b	a	b	b	b	b	a	b	b	b	b	a	a	-	b	b	a	a	-	a	a	b	b
AHMR_05N01**	24.388	b	a	b	a	a	a	a	b	a	a	b	a	a	a	a	a	a	b	b	a	a	a	a	a	a	b	a	b	b	b	b	b	b	b	b	b	a	a	a	b	b	a	a	-	a	a	b	b
BBMR_12C06	37.253	b	a	b	a	a	a	a	b	a	a	b	a	a	a	a	a	a	b	b	b	a	a	a	a	a	b	a	a	a	b	b	b	b	b	b	b	b	a	a	b	b	a	a	a	a	a	b	b
CBBMR_12I02	37.253	b	a	b	a	a	a	a	b	a	a	b	a	a	a	a	a	a	b	b	b	a	a	a	a	a	b	a	a	a	b	b	b	b	b	b	b	b	a	a	b	b	a	a	a	a	a	b	b
CBBMR_14J14	37.253	b	a	b	a	a	a	a	b	a	a	b	a	a	a	a	a	a	b	b	b	a	a	a	a	a	b	a	a	a	b	b	b	b	b	b	b	b	a	a	b	b	a	a	a	a	a	b	b
CBBMR_16K24	37.253	b	a	b	a	a	a	a	b	a	a	b	a	a	a	a	a	a	b	b	b	a	a	a	a	a	b	a	a	a	b	b	b	b	b	b	b	b	a	a	b	b	a	a	a	a	a	b	b
ABMR_07P16*	37.253	b	a	b	a	a	a	a	b	a	a	b	a	a	a	a	a	a	b	b	b	a	a	a	a	a	b	a	a	a	b	b	b	b	b	b	b	b	a	a	b	b	a	a	a	a	a	b	b
ABMR_07C04	47.141	b	a	b	a	a	a	a	b	a	a	b	a	a	b	a	a	a	b	b	b	a	b	b	a	a	b	a	a	a	b	b	b	b	b	b	b	b	a	a	b	b	a	a	a	a	a	b	b
ABMR_08B24	58.609	b	a	b	a	a	a	a	b	a	a	b	a	a	b	a	a	a	b	b	b	a	b	b	a	a	b	a	a	-	b	b	b	b	b	a	b	b	a	a	b	b	a	a	a	b	a	a	b
AHMR_08M21*	58.906	b	a	b	a	a	a	a	b	a	a	b	a	a	b	a	a	a	b	b	b	a	b	b	a	a	b	a	a	a	b	b	b	b	b	a	b	b	a	a	b	b	a	a	a	b	a	a	b
CBBMR_11B02*	58.906	b	a	b	a	a	a	a	b	a	a	b	a	a	b	a	a	a	b	b	b	a	b	b	a	a	b	a	a	a	b	b	b	b	b	a	b	b	a	a	b	b	a	a	a	b	a	a	b
BBMR_13N23*	58.906	b	a	b	a	a	a	a	b	a	a	b	a	a	b	a	a	a	b	b	b	a	b	b	a	a	b	a	a	a	b	b	b	b	b	a	b	b	a	a	b	b	a	a	a	b	a	a	b
CAHMR_08E12**	58.906	b	a	b	a	-	a	a	b	a	a	b	a	a	-	a	a	a	b	b	b	a	b	b	a	a	b	a	a	a	b	b	b	b	b	a	b	-	a	a	b	b	a	a	a	b	a	a	b
CAHMR_01K12**	58.906	b	a	b	a	a	a	a	b	a	a	b	a	a	b	a	a	a	b	b	b	a	b	b	a	a	b	a	a	a	b	b	-	b	b	a	b	b	a	a	b	b	a	a	a	b	a	a	b
CABMR_07O23**	60.638	b	a	b	a	a	a	a	b	a	a	b	a	a	a	a	a	a	b	b	b	a	b	b	a	a	b	a	a	a	b	b	b	b	b	a	b	b	a	a	a	b	b	a	a	b	a	a	b
BHMR_09O22*	61.187	b	a	b	-	a	a	a	b	a	b	b	a	a	a	a	a	a	b	b	b	a	b	b	a	a	b	a	a	a	b	b	b	b	b	a	b	b	a	a	a	b	b	a	a	b	a	a	b
AHMR_05J13*	61.187	b	a	b	a	a	a	a	b	a	b	b	a	a	a	a	a	a	b	b	b	a	b	b	a	a	b	a	a	a	b	b	b	b	b	a	b	b	a	a	a	b	b	a	a	-	a	a	b
BHMR_16F22	63.566	b	a	b	a	a	a	a	b	a	-	b	a	b	b	a	a	a	b	b	b	a	b	b	a	-	b	a	a	a	b	b	b	b	b	a	b	b	a	a	b	b	-	a	a	b	a	a	b
ABMR_01C07	67.584	b	a	a	a	a	a	a	b	a	b	b	a	b	a	a	a	a	b	b	b	a	b	b	a	a	b	a	a	a	b	b	b	b	b	a	b	b	a	a	a	b	b	a	a	b	a	a	b
ABMR_01G02	67.584	b	a	a	a	a	a	a	b	a	b	b	a	b	a	a	a	a	b	b	b	a	b	b	a	a	b	a	a	a	b	b	b	b	b	a	b	b	a	a	a	b	b	a	a	b	a	a	b
CABMR_04J06	67.986	b	a	a	a	a	a	a	b	a	b	b	a	b	a	a	a	a	b	b	b	a	b	b	a	a	b	a	a	a	b	b	b	b	b	a	b	b	a	a	a	b	b	a	a	b	a	a	b
BBMR_10O13	67.986	b	a	a	a	a	a	a	b	a	b	b	a	b	a	a	a	a	b	b	b	a	b	b	a	a	b	a	a	a	b	b	b	b	b	a	b	b	a	a	a	b	b	a	a	b	a	a	b
BHMR_09I11	67.986	b	a	a	a	a	a	a	b	a	b	b	a	b	a	a	a	a	b	b	b	a	b	b	a	a	b	a	a	a	b	b	b	b	b	a	b	b	a	a	a	b	b	a	a	b	a	a	b
CABMR_03M18	67.986	b	a	a	a	a	a	a	b	a	b	b	a	b	a	a	a	a	b	b	b	a	b	b	a	a	b	a	a	a	b	b	b	b	-	a	b	b	a	a	a	b	b	a	a	b	a	a	b
ABMR_07A04	68.662	b	a	a	a	a	a	a	b	a	b	b	a	b	a	a	a	a	b	b	b	a	b	b	a	a	b	a	a	a	b	b	b	b	b	a	b	b	a	a	a	b	b	a	a	b	a	a	b
AHMR_05L10	68.662	b	a	a	a	a	a	a	b	a	b	b	a	b	a	a	a	a	b	b	b	a	b	b	a	a	b	a	a	a	b	b	b	b	b	a	b	b	a	a	a	b	b	a	a	b	a	a	b
BHMR_09H02	68.662	b	a	a	a	a	a	a	b	a	b	b	a	b	a	a	a	a	b	b	b	a	b	b	a	a	b	a	a	a	b	b	b	b	b	a	b	b	a	a	a	b	b	a	a	b	a	a	b
BHMR_16P01	69.046	b	a	a	a	a	a	a	b	a	b	b	a	b	a	a	a	a	b	b	b	a	b	b	a	a	b	a	a	a	b	b	b	b	b	a	b	b	a	a	a	b	b	a	a	b	a	a	b
BBMR_13L04	72.577	b	a	a	a	a	a	a	b	a	b	a	a	b	a	a	a	a	b	a	b	a	b	b	a	a	b	a	a	a	b	b	b	b	b	a	b	b	a	a	a	b	b	a	a	b	a	a	b
CAHMR_01O02	74.089	b	a	a	a	a	a	a	b	a	b	a	a	b	b	a	a	a	b	a	b	a	b	b	a	a	b	a	a	a	b	b	b	b	b	a	b	b	a	a	a	b	b	a	a	b	a	a	b
BHMR_15P13	76.312	b	a	a	a	a	a	a	b	a	a	a	a	b	b	a	a	a	b	a	b	b	b	b	a	a	b	a	a	a	b	b	b	b	b	a	b	b	a	a	a	b	b	a	a	b	a	a	b
BHMR_12K20	76.312	b	-	-	a	a	a	a	b	a	a	a	a	-	b	a	a	a	b	a	b	b	b	b	a	a	b	a	a	-	-	b	b	b	b	a	b	b	-	-	a	b	b	a	a	b	a	a	b
CAHMR_06I09	79.335	b	a	a	a	a	a	a	b	a	a	a	a	b	b	a	a	a	b	a	b	b	b	b	a	a	b	a	a	a	b	b	b	b	b	a	b	b	a	a	a	b	b	a	a	b	a	a	b
CAHMR_01N11	79.335	b	a	a	a	a	a	a	b	a	a	a	a	b	b	a	a	a	b	a	b	b	b	b	a	a	b	a	a	a	b	b	b	b	b	a	b	b	a	a	a	b	b	a	a	b	a	a	b
BBMR_11A08	79.335	b	a	a	a	a	a	a	b	a	a	a	a	b	b	a	a	a	b	a	b	b	b	b	a	a	b	a	-	a	b	b	b	b	b	a	b	b	a	a	a	b	b	a	a	b	a	a	b
ABMR_04B04	80.997	b	a	a	a	a	a	a	b	a	a	a	a	b	b	a	a	a	b	a	b	b	b	b	a	a	b	a	a	b	b	b	b	b	b	a	b	b	a	a	a	b	b	a	a	b	a	a	a
AHMR_01K09	84.4	b	a	a	a	a	a	a	b	a	a	a	a	b	b	a	a	a	b	a	b	b	b	b	a	a	b	a	a	b	b	b	b	b	b	a	b	b	a	a	a	b	b	a	a	b	a	a	a
CAHMR_03O04	88.619	b	a	a	a	a	a	a	b	a	a	a	a	b	b	a	a	a	b	a	b	b	b	b	a	a	b	a	a	b	b	b	b	b	b	a	b	b	a	-	b	b	b	a	a	b	a	a	a
CAHMR_03K09	103.058	a	b	a	a	a	a	a	b	a	a	a	a	b	b	a	a	a	b	a	b	b	b	b	a	b	b	a	a	b	b	b	a	b	b	a	a	b	a	b	b	b	b	a	a	b	b	a	a
CAHMR_04D20	103.058	a	b	a	a	a	a	a	b	a	a	a	a	b	b	a	a	a	b	a	b	b	b	b	a	b	b	a	a	b	b	b	a	b	b	a	a	-	a	b	b	b	b	a	a	b	b	a	a
BHMR_10B15	103.058	a	b	a	a	a	a	a	b	-	-	a	a	b	b	a	a	a	b	a	b	b	b	b	a	b	b	a	a	b	b	b	a	b	b	a	a	b	a	b	b	b	b	-	a	b	b	a	a
CAHMR_03I13	135.149	a	b	a	a	a	a	a	b	b	a	b	a	b	a	a	a	a	b	a	b	a	b	b	a	b	b	b	b	b	a	b	a	a	b	a	a	b	a	b	b	a	b	a	a	b	b	a	b
CAHMR_06K21	135.149	a	b	a	a	a	a	a	b	b	a	b	a	b	a	a	a	a	b	a	b	a	b	b	a	b	b	b	b	b	a	b	a	a	b	a	a	b	a	b	b	a	b	a	a	b	b	a	b
ABMR_08L19	135.149	a	b	a	a	a	a	a	b	b	a	b	a	b	a	a	a	a	b	a	b	a	b	b	a	b	b	b	b	b	a	b	a	a	b	a	a	b	a	b	b	a	b	a	a	-	b	a	b
AHMR_05J17	135.149	a	b	a	a	a	a	a	b	b	a	b	a	b	a	a	a	a	b	a	b	a	b	b	a	b	b	b	b	b	a	b	a	a	b	a	a	b	a	b	b	a	b	a	a	b	b	a	b
AHMR_04E06	135.149	a	b	a	a	a	a	a	b	b	a	b	a	b	a	a	a	a	b	a	b	a	b	b	a	b	-	b	b	-	-	b	a	a	b	a	a	b	a	b	b	a	b	a	a	b	b	a	b
CABMR_06I18*	135.971	a	b	a	a	a	a	a	b	b	a	b	a	b	a	a	a	a	b	a	b	a	b	b	a	b	b	b	b	b	a	b	a	a	b	a	a	b	a	b	b	a	b	a	a	b	b	a	b
group 8
AHMR_06F24	0	b	b	a	b	b	b	b	a	a	b	b	a	a	a	a	a	a	a	b	b	a	b	a	a	b	a	a	a	b	-	b	a	b	b	a	b	a	a	a	-	a	a	a	a	a	a	b	a
BHMR_14G03	2.955	b	b	a	b	b	b	b	a	a	b	b	a	a	a	a	a	a	a	b	b	a	b	a	a	b	a	a	a	b	b	b	a	b	b	a	b	a	a	a	b	a	a	a	a	b	a	b	a
BHMR_14I05	2.955	b	b	a	b	b	b	b	a	a	b	b	a	a	a	a	a	a	a	b	b	a	b	a	a	b	a	a	a	b	b	b	a	b	b	a	b	a	a	a	b	a	a	a	a	b	a	b	a
BBMR_12A13	3.575	b	b	a	b	b	b	b	a	a	b	b	a	a	a	a	a	a	a	b	b	a	b	a	a	b	a	a	-	b	b	b	a	b	b	a	b	a	a	a	b	a	a	a	a	b	a	b	a
CBBMR_11E02	18.481	b	b	a	b	b	b	a	a	a	a	b	a	a	a	a	b	a	a	b	b	b	b	a	a	b	a	a	a	a	b	b	a	b	b	a	b	b	a	a	b	a	a	a	a	b	a	a	a
BBMR_16N19	18.481	b	b	a	b	b	b	a	a	a	a	b	a	a	a	a	b	a	a	b	b	b	b	a	a	b	a	a	a	a	b	b	a	b	b	a	b	b	a	a	b	a	a	a	-	b	a	a	a
BBMR_12O15	18.805	b	b	a	b	b	b	a	a	a	a	b	a	-	a	a	b	a	a	b	b	b	b	a	a	b	a	a	a	a	b	b	a	b	b	a	b	b	a	a	b	a	a	a	a	b	a	a	a
CABMR_02P02	21.081	b	b	a	b	b	b	a	a	a	a	b	a	a	a	a	b	a	a	b	b	b	b	a	a	b	a	a	a	a	b	b	a	b	b	a	b	b	a	a	b	a	a	a	a	b	a	a	a
CABMR_07D02	21.737	b	b	a	b	b	b	a	a	a	a	b	a	a	a	a	b	a	a	b	b	b	b	a	a	b	a	a	a	a	b	b	a	b	b	a	b	b	a	a	b	a	a	a	a	a	a	a	a
AHMR_06I06	21.737	b	b	a	b	b	b	a	a	a	a	b	a	a	a	a	b	a	a	b	b	b	b	a	a	b	a	a	a	a	b	b	a	b	b	a	b	b	a	a	b	a	a	a	a	a	a	a	a
AHMR_07A07	21.737	b	b	a	b	b	b	a	a	a	a	b	a	a	a	a	b	a	a	b	b	b	b	a	a	b	a	a	a	a	b	b	a	b	b	a	b	b	a	a	b	a	a	a	a	a	a	a	a
ABMR_08J16	23.282	b	b	a	b	b	b	a	a	a	a	b	a	a	a	a	-	a	a	b	b	b	b	a	a	b	a	a	a	a	b	b	a	b	-	a	b	b	a	a	b	a	a	a	a	a	a	a	a
ABMR_03P16	24.974	b	b	a	b	b	b	a	a	a	a	b	a	a	a	a	b	a	a	b	b	b	b	a	a	b	a	a	a	a	b	b	a	b	b	a	b	b	a	a	b	a	a	a	a	a	a	a	a
ABMR_07O16	24.974	b	b	a	b	b	b	a	a	a	a	b	a	a	a	a	b	a	a	b	b	b	b	a	a	b	a	a	a	a	b	b	a	b	b	a	b	b	a	a	b	a	a	a	a	a	a	a	a
CAHMR_08O16	29.076	b	b	a	b	b	b	a	a	a	a	b	a	a	b	a	b	a	a	b	b	b	b	a	a	b	b	a	a	a	b	b	a	b	b	a	b	b	b	a	b	a	a	a	a	a	a	a	a
AHMR_05D09	31.53	b	b	a	b	b	b	a	a	a	a	b	a	b	b	a	b	a	a	b	b	b	b	a	a	b	b	a	a	a	b	b	a	b	b	a	b	b	b	a	b	a	a	a	a	a	a	a	a
AHMR_03N15	32.36	b	b	a	b	b	b	a	a	a	a	b	a	b	b	a	b	a	a	b	b	b	b	a	a	b	b	a	a	a	b	b	a	b	b	a	b	b	b	a	b	b	a	a	a	a	a	a	a
ABMR_03G03	36.303	b	b	a	b	b	b	a	a	a	a	b	a	b	b	a	b	a	a	b	b	b	b	a	b	b	b	a	a	a	b	b	a	b	b	a	b	b	b	a	b	b	a	a	a	b	a	a	b
ABMR_08E22	36.303	b	b	a	b	b	b	a	a	a	a	b	a	b	b	a	b	a	a	b	b	b	b	a	b	b	b	a	a	a	b	b	a	b	b	a	b	b	b	a	b	b	a	a	a	b	a	a	b
ABMR_01M01	38.567	b	b	a	b	b	b	a	a	a	a	b	a	b	b	a	b	a	a	b	b	b	b	a	b	b	b	a	a	a	b	b	a	b	b	a	b	b	b	a	b	b	a	a	a	a	a	a	a
CAHMR_03C06	38.567	b	b	a	b	b	b	a	a	a	a	b	a	b	b	a	b	a	a	b	b	b	b	a	b	b	b	a	a	a	b	b	a	b	b	a	b	b	b	a	b	b	a	a	a	a	a	a	a
AHMR_08E06	38.567	b	b	a	b	b	b	a	a	a	a	b	a	b	b	a	b	a	a	b	b	b	b	a	b	b	b	a	a	a	b	b	a	b	b	a	b	b	b	a	b	b	a	a	a	a	a	a	a
AHMR_03A12	38.988	b	b	a	b	b	b	a	a	a	a	b	a	b	b	a	b	a	a	b	b	b	b	a	b	b	b	a	a	a	b	b	a	b	b	a	b	b	b	a	b	b	a	a	a	b	a	a	a
AHMR_07C16	38.988	b	b	a	b	b	b	a	-	a	a	b	a	b	b	a	b	a	a	b	b	b	b	a	b	b	b	a	a	a	b	b	a	b	b	a	b	b	b	a	b	b	a	a	a	b	a	a	a
BBMR_13B05	40.788	b	b	a	b	b	b	a	a	a	a	b	a	b	b	a	b	a	a	b	b	b	b	a	b	b	b	a	a	a	b	b	a	b	b	a	b	b	b	a	b	b	a	a	a	b	a	a	a
BBMR_14L17	40.788	b	b	a	b	b	b	a	a	a	a	b	a	b	b	a	b	a	a	b	b	b	b	a	b	b	b	a	a	a	b	b	a	b	b	a	b	b	b	a	b	b	a	a	a	b	a	a	a
BHMR_12G15	50.332	b	a	a	b	b	b	a	a	a	a	b	a	b	b	a	b	a	a	b	b	b	b	a	b	b	b	a	a	a	b	b	a	b	b	a	b	b	b	a	b	b	a	a	b	b	b	a	a
CAHMR_01F01	52.885	b	a	a	b	b	b	a	a	a	a	b	a	b	b	a	b	a	a	b	b	b	b	a	b	b	b	a	a	a	b	b	a	b	b	a	b	b	b	a	b	b	a	a	b	a	b	a	b
CAHMR_04F07	54.793	b	a	a	b	b	b	a	a	a	a	b	a	b	b	a	b	a	a	b	b	b	b	a	b	b	b	a	a	a	b	b	a	b	b	a	b	b	b	a	b	b	a	a	b	a	b	a	a
CBBMR_15B17	65.688	b	a	b	b	b	b	a	a	a	a	a	a	b	b	a	b	b	a	b	b	b	b	a	b	b	b	a	a	a	b	b	a	b	a	a	b	b	b	a	a	b	a	a	b	b	b	a	a
BHMR_11K19	65.688	b	a	b	b	b	b	a	a	a	a	a	a	b	b	a	b	b	a	b	b	b	b	a	b	b	b	a	a	a	b	b	a	b	a	a	b	b	b	a	a	b	a	a	b	b	b	a	a
CBHMR_16D01	65.688	b	a	b	b	b	b	a	a	a	a	a	a	b	b	a	b	b	a	b	b	b	b	a	b	b	b	a	a	a	b	b	a	b	a	a	b	b	b	a	a	b	a	a	b	-	-	a	a
BHMR_11P07	65.688	b	a	b	b	b	b	a	a	-	a	a	a	b	b	a	b	b	a	b	b	b	b	a	b	b	b	a	a	a	b	b	a	b	a	a	b	b	b	a	a	b	a	a	b	-	b	-	a
group 9
CABMR_07D04	0	a	a	a	a	b	b	b	a	b	b	a	b	a	a	a	b	b	b	a	b	b	a	b	b	a	a	a	a	b	a	a	a	a	a	a	a	a	b	b	a	a	a	a	a	a	b	b	b
BHMR_10A17	0	a	a	a	a	b	b	b	a	b	b	a	b	a	a	a	b	b	b	a	b	b	a	b	b	a	a	a	a	b	a	a	a	a	a	a	a	a	b	b	a	a	a	a	a	a	b	b	b
BHMR_13L24	0	a	a	a	a	b	b	b	a	b	b	a	b	a	a	a	b	b	b	a	b	b	a	b	b	a	a	a	a	b	a	a	a	a	a	a	a	a	b	b	a	a	a	a	a	a	b	b	b
CAHMR_05B20	12.741	a	b	b	a	b	a	a	a	b	b	b	b	a	a	a	b	b	b	a	b	b	a	b	b	a	a	a	b	b	a	b	a	b	a	a	a	a	b	b	a	a	a	a	a	a	b	b	b
CAHMR_08F16	16.12	a	b	b	a	b	a	a	a	b	b	b	b	a	a	a	b	b	b	a	b	b	a	b	b	a	a	b	b	a	a	b	a	b	a	a	a	a	a	b	a	a	a	a	a	a	b	b	b
BBMR_10H22	29.351	a	b	b	a	b	a	a	a	b	a	b	b	-	a	a	a	b	b	a	b	b	a	b	b	b	a	b	b	a	a	b	a	b	a	a	a	b	a	b	a	a	a	a	a	a	b	b	b
BBMR_14D02	29.351	a	b	b	a	b	a	a	a	b	a	b	b	-	-	a	a	b	b	a	b	b	a	b	b	b	a	b	b	a	a	b	a	b	a	a	a	b	a	b	a	a	a	a	a	a	b	b	b
CBHMR_15D24	29.979	a	b	b	a	b	a	a	a	b	a	b	b	a	a	a	a	b	b	a	b	b	a	-	b	b	a	b	b	a	a	b	a	b	a	a	a	b	a	b	a	a	a	a	a	a	b	b	b
ABMR_07C16	33.423	a	b	b	a	b	a	a	a	b	a	b	b	a	a	a	a	b	b	a	a	b	a	b	b	b	a	b	b	a	a	b	a	b	a	b	a	b	a	b	a	a	a	a	a	a	b	b	b
CBBMR_09I17	37.52	a	b	b	a	b	a	a	a	b	a	b	b	b	a	a	a	b	b	a	a	b	a	b	b	b	a	b	b	a	a	b	a	b	a	b	a	b	a	b	a	-	a	b	a	a	b	b	b
AHMR_01L11	49.91	a	-	-	a	b	a	-	a	-	a	b	a	-	a	a	a	b	b	b	a	b	a	b	b	b	-	b	b	a	-	b	-	b	a	b	a	b	a	b	a	a	a	a	a	a	b	b	b
AHMR_06I15	50.621	a	b	-	a	b	a	a	a	b	a	b	a	b	a	a	a	b	b	b	a	b	a	b	b	b	a	b	b	a	a	b	b	b	a	b	a	b	a	b	a	a	a	b	a	-	-	b	b
BBMR_14I08	51.158	a	b	b	a	b	a	a	a	b	a	b	a	b	a	a	a	b	b	b	a	b	a	b	b	b	a	b	b	a	a	b	b	b	a	b	a	b	a	b	a	a	a	b	a	a	b	b	b
CBHMR_09F14	51.158	a	b	b	a	b	a	a	a	b	a	b	a	b	a	a	a	b	b	b	a	b	a	b	b	b	a	b	b	a	a	b	b	b	a	b	a	b	a	b	a	a	a	b	a	a	b	b	b
CBHMR_09J13	51.158	a	b	b	a	b	a	a	a	b	a	b	a	b	a	a	a	b	b	b	a	b	a	b	b	b	a	b	b	a	a	b	b	b	a	b	a	b	a	b	a	a	a	b	a	a	b	b	b
BHMR_10M24	51.158	a	b	b	a	b	a	a	a	b	a	b	a	b	a	a	a	b	b	b	a	b	a	b	b	b	a	b	b	a	a	b	b	b	a	b	a	b	a	b	a	a	a	b	a	a	b	b	b
BHMR_13B06	51.158	a	b	b	a	b	a	a	a	b	a	b	a	b	a	a	a	b	b	b	a	b	a	b	b	b	a	b	b	a	a	b	b	b	a	b	a	b	a	b	a	a	a	b	a	a	b	b	b
BHMR_14G15	51.158	a	b	b	a	b	a	a	a	b	a	b	a	b	a	a	a	b	b	b	a	b	a	b	b	b	a	b	b	a	a	b	b	b	a	b	a	b	a	b	a	a	a	b	a	a	b	b	b
BHMR_09J10	51.158	a	b	b	a	b	a	a	a	b	a	b	a	b	a	a	a	b	b	b	a	b	a	b	b	b	a	b	b	a	a	b	b	b	a	b	a	-	a	b	a	a	a	b	a	a	b	b	b
AHMR_03N23	51.158	a	b	-	a	b	a	a	-	b	a	b	a	b	a	a	a	b	b	b	a	b	a	b	b	b	a	b	b	a	a	b	b	b	a	b	a	b	a	b	a	a	a	b	a	a	b	b	b
BHMR_09N24	51.158	a	b	b	-	b	a	a	a	b	a	b	a	b	a	a	a	b	b	b	a	b	a	b	b	b	a	b	b	a	a	b	b	b	a	b	a	b	a	b	a	a	a	b	a	a	b	b	b
BHMR_13E14	51.158	a	b	b	a	b	a	a	a	b	a	b	a	b	-	a	a	b	b	b	a	b	a	b	b	b	a	b	b	a	a	b	b	b	a	b	-	b	a	b	a	-	a	b	a	a	b	b	b
AHMR_08B12	51.158	a	b	b	-	b	a	a	a	b	a	b	a	b	a	a	a	-	b	b	a	b	a	b	b	b	a	b	b	a	a	b	b	-	a	b	a	b	a	b	a	a	a	-	a	-	b	b	b
CAHMR_02J16	52.012	a	b	b	a	b	a	a	a	b	a	b	a	b	a	b	a	b	b	b	a	b	a	b	b	b	a	b	b	a	a	b	b	b	a	b	a	b	a	b	a	a	a	b	a	a	b	b	b
CAHMR_06A08	52.012	a	-	-	a	b	a	-	-	-	a	b	a	-	a	b	a	b	b	-	a	b	a	b	b	b	-	b	b	a	-	b	-	b	a	b	a	b	a	b	a	a	a	b	a	a	b	b	b
BHMR_11N07	55.39	b	b	b	a	b	a	a	a	b	a	b	a	b	a	b	a	b	b	b	a	b	a	b	b	b	a	b	b	a	a	b	b	b	a	b	a	b	a	b	a	a	b	b	a	a	b	b	b
ABMR_06O19	55.39	b	b	b	a	b	a	a	a	b	a	b	a	b	a	b	a	b	b	b	a	b	a	b	b	b	a	b	b	a	a	b	b	b	a	b	a	b	a	b	a	a	b	b	a	a	b	b	b
ABMR_07B12	55.39	b	b	b	a	b	a	a	a	b	a	b	a	b	a	b	a	b	b	b	a	b	a	b	b	b	a	b	b	a	a	b	b	b	a	b	a	b	a	b	a	a	b	b	a	a	b	b	b
BBMR_12C16	55.39	b	b	b	a	b	a	a	a	b	a	b	a	b	a	b	a	b	b	b	a	b	a	b	b	b	a	b	b	a	a	b	b	b	-	b	a	b	a	b	a	a	b	b	a	a	b	b	b
BHMR_16J03	55.39	b	b	b	a	b	-	-	-	b	-	b	a	b	a	b	a	b	b	b	a	b	a	b	b	b	a	b	b	a	a	b	b	b	a	b	a	b	a	b	a	a	b	b	a	a	b	b	b
AHMR_08B06	55.39	b	b	b	a	b	a	a	a	b	a	b	a	b	a	b	a	b	b	b	a	b	a	b	b	b	a	b	b	a	a	b	-	b	a	b	-	b	a	b	a	a	b	b	a	a	b	b	b
AHMR_08A17	55.39	b	b	b	a	b	a	-	a	b	a	-	a	b	a	-	a	b	b	b	a	b	a	-	b	b	a	-	-	a	a	b	b	b	a	b	a	b	a	b	a	a	b	b	a	a	b	b	b
ABMR_05N20	58.274	b	b	a	b	b	a	a	a	b	a	b	a	b	a	b	a	b	b	b	a	b	a	b	b	b	a	b	b	a	a	b	b	b	a	b	a	b	a	b	a	a	b	b	a	a	a	b	b
CABMR_07K05	58.274	b	b	a	b	b	a	a	a	b	a	b	a	b	a	b	a	b	b	b	a	b	a	b	b	b	a	b	b	a	a	b	b	b	a	b	a	b	a	b	a	a	b	b	a	a	a	b	b
ABMR_08B17	58.274	b	b	a	b	b	a	a	a	b	a	b	a	b	a	b	a	b	b	b	a	b	a	b	b	b	a	b	b	a	a	b	b	b	a	b	a	b	a	b	a	a	b	b	a	a	a	b	b
BHMR_10O07	58.274	b	b	a	b	b	a	a	a	b	a	b	a	b	a	b	a	b	b	b	a	b	a	b	b	b	a	b	b	a	a	b	b	b	a	b	a	b	a	b	a	a	b	b	a	a	a	b	b
BHMR_13F23	58.274	b	b	a	b	b	a	a	a	b	a	b	a	b	a	b	a	b	b	b	a	b	a	b	b	b	a	b	b	a	a	b	b	b	a	b	a	b	a	b	a	a	b	b	a	a	a	b	b
BHMR_13N21	58.274	b	b	a	b	b	a	a	a	b	a	b	a	b	a	b	a	b	b	b	a	b	a	b	b	b	a	b	b	a	a	b	b	b	a	b	a	b	a	b	a	a	b	b	a	a	a	b	b
BHMR_11D22	58.274	b	b	a	b	b	a	a	a	b	a	b	a	b	a	b	a	b	b	b	a	b	a	b	b	b	a	b	b	a	a	b	b	b	a	b	a	b	a	-	a	a	b	b	a	a	a	b	b
CBBMR_09M23	58.274	b	b	a	b	b	a	a	a	b	a	b	a	b	a	b	a	b	b	b	a	b	a	b	b	b	a	b	b	a	a	b	b	b	a	b	a	b	a	b	a	a	b	b	a	a	a	b	b
CABMR_06A13	58.274	b	b	a	b	b	a	a	a	b	a	b	a	b	a	b	a	b	b	b	a	b	a	b	b	b	a	b	-	a	a	b	b	b	a	-	a	b	a	b	a	a	b	b	a	a	a	-	-
BBMR_16B04	61.269	b	b	a	b	b	a	a	a	b	a	b	a	b	a	b	a	b	b	a	a	b	a	b	b	b	a	b	b	a	a	b	b	b	a	b	a	b	a	b	a	a	b	b	-	a	a	b	b
AHMR_03E08	63.013	b	b	a	b	b	a	a	a	b	a	b	a	b	a	b	a	b	b	a	a	b	a	b	b	b	a	b	b	a	a	b	b	b	a	b	a	b	a	b	a	a	b	b	b	a	a	b	b
CBBMR_13N08	63.013	b	b	a	b	b	a	a	a	b	a	b	a	b	a	b	a	b	b	a	a	b	a	b	b	b	a	b	b	a	a	b	b	b	a	b	a	b	a	b	a	a	b	b	b	a	a	b	b
CAHMR_07D15	63.013	b	b	a	b	b	a	a	a	b	a	-	a	b	a	b	a	b	-	a	a	b	a	b	b	b	a	b	b	a	a	b	b	b	a	b	a	b	a	b	a	a	-	b	b	a	a	b	b
ABMR_02P18	66.719	b	b	a	a	b	a	a	a	b	a	b	a	b	a	b	a	b	b	a	a	b	a	b	b	b	a	b	b	a	a	b	b	b	a	b	a	b	a	b	a	a	b	b	b	a	a	b	b
BHMR_16J16	66.719	b	b	a	a	b	a	a	a	b	a	b	a	b	a	b	a	b	b	a	a	b	a	b	b	b	a	b	b	a	a	b	b	b	a	b	a	b	a	b	a	a	b	b	b	a	a	b	b
ABMR_07E24	66.719	b	b	a	a	b	a	a	a	b	a	b	a	b	a	b	a	b	b	a	a	b	a	b	b	b	a	-	b	a	a	b	b	b	a	b	a	b	a	b	a	a	b	b	b	a	a	b	b
ABMR_01F05	66.719	b	b	a	a	b	a	a	a	b	a	b	a	b	a	b	a	b	b	a	a	b	a	b	b	b	a	-	b	a	a	b	b	b	a	b	a	b	a	-	a	a	b	b	b	a	a	b	b
BBMR_13O08	66.719	b	b	a	-	b	a	a	a	b	a	b	a	b	a	b	a	b	b	a	a	b	a	b	b	b	a	b	b	a	a	b	b	b	a	b	a	b	a	b	a	a	b	b	b	a	a	b	b
ABMR_03H02	70.167	b	b	a	a	b	a	a	a	b	a	b	a	b	a	b	a	b	b	a	a	b	b	b	b	b	a	b	b	a	a	b	b	b	b	b	a	b	a	b	a	a	b	b	b	a	a	a	b
ABMR_07D12	70.167	b	b	a	a	b	a	a	a	b	a	b	a	b	a	b	a	b	b	a	a	b	b	b	b	b	a	b	b	a	a	b	b	b	b	b	a	b	a	b	a	a	b	b	b	a	a	a	b
BBMR_10M20	70.167	b	b	a	a	b	a	a	a	b	a	b	a	b	a	b	a	b	b	a	a	b	b	b	b	b	a	b	b	a	a	b	b	b	b	b	a	b	a	b	a	a	b	b	b	a	a	a	b
BBMR_16C10	70.167	b	b	a	a	b	a	a	a	b	a	b	a	b	-	b	a	b	b	a	a	b	b	b	b	b	a	b	b	a	a	b	b	b	b	b	a	b	a	b	a	a	b	b	b	a	a	a	b
BHMR_12G09	75.141	b	b	a	a	b	a	a	a	b	b	b	a	b	a	b	a	b	b	a	a	b	b	b	b	b	a	b	b	a	a	b	b	b	b	b	a	b	a	b	a	a	b	a	b	b	a	a	b
CABMR_01E01	75.984	b	b	a	a	b	b	a	a	b	b	b	a	b	a	b	a	b	b	a	a	b	b	b	b	b	a	b	b	a	a	b	b	b	b	b	a	b	a	b	a	a	b	a	b	b	a	a	b
AHMR_01C05	77.502	b	b	a	a	b	b	a	a	b	b	b	a	b	a	b	a	b	b	a	a	b	b	b	b	b	a	b	b	a	a	b	b	b	b	b	a	b	a	b	a	a	b	a	b	-	a	a	b
ABMR_06C15	88.996	b	b	a	a	b	b	a	a	a	b	b	a	b	a	b	a	b	a	a	b	b	b	b	b	b	a	b	b	a	a	a	b	b	b	b	a	b	a	b	b	a	a	a	b	b	a	a	b
BBMR_12J05	88.996	b	b	a	a	b	b	a	a	a	b	b	a	b	a	b	a	b	a	a	b	b	b	b	b	b	a	b	b	a	a	a	b	b	b	b	a	b	a	b	b	a	a	a	b	b	a	a	b
CBHMR_12L06	92.444	b	a	a	a	b	b	a	a	a	b	b	a	b	a	b	a	b	a	a	b	b	b	b	a	b	a	b	b	a	a	a	b	b	b	b	a	b	a	b	b	a	a	a	b	b	a	a	b
BBMR_11B19	97.508	b	a	a	a	b	b	a	a	a	b	b	a	b	a	b	b	b	a	a	b	b	b	b	a	b	a	b	b	a	a	a	b	b	b	a	b	b	a	b	b	a	a	a	b	b	a	a	b
BBMR_10P01	97.508	b	a	a	a	b	b	a	a	a	b	b	a	b	-	b	b	b	a	a	b	b	b	b	a	b	a	b	b	a	a	a	b	b	b	a	b	b	a	b	b	a	a	a	b	b	a	a	b
BBMR_13H12	97.508	b	a	a	a	b	b	a	a	a	b	b	a	b	a	b	b	b	a	a	b	b	b	b	a	b	a	b	b	a	a	a	b	b	b	a	b	b	a	b	b	a	a	a	b	b	a	a	b
ABMR_03J10	100.082	b	a	a	a	b	b	a	a	a	b	b	a	b	a	b	b	b	a	a	b	b	b	b	a	b	a	b	b	a	a	a	b	b	b	a	b	b	a	b	b	a	a	a	b	b	b	a	b
CBBMR_11N22*	115.649	a	a	a	a	a	b	b	a	a	b	b	a	a	a	a	b	a	a	b	b	b	b	b	a	b	a	a	b	a	a	a	b	b	b	a	b	b	a	b	b	a	a	a	b	b	b	a	b
BBMR_13D04	115.649	a	a	a	a	a	b	b	a	a	b	b	a	a	a	a	b	a	a	b	b	b	b	b	a	b	a	a	b	a	a	a	b	b	b	a	b	b	a	b	b	a	a	a	b	b	b	a	b
CAHMR_06G09	118.135	a	a	a	a	a	b	b	a	a	b	b	a	a	a	a	b	a	a	b	b	b	b	b	a	b	a	a	b	a	a	a	b	b	b	a	b	b	b	b	b	a	a	a	b	b	b	a	b
CAHMR_07F21	118.135	a	a	a	a	a	b	b	a	a	b	b	a	a	a	a	b	a	a	b	b	b	b	b	a	b	a	a	b	a	a	a	b	b	b	a	b	b	b	b	b	a	a	a	b	b	b	a	b
BBMR_13K23	118.135	a	a	a	a	a	b	b	a	a	b	b	a	a	a	a	b	a	a	b	b	b	b	b	a	b	a	a	b	a	a	a	b	b	b	a	b	b	b	b	b	a	a	a	b	b	b	a	b
BBMR_14I15	118.135	a	a	a	a	a	b	b	a	a	b	b	a	a	a	a	b	a	a	b	b	b	b	b	a	b	a	a	b	a	a	a	b	b	b	a	b	b	b	b	b	a	a	a	b	b	b	a	b
CAHMR_07P11	118.135	a	a	a	a	a	b	b	a	a	b	b	a	a	a	a	b	a	a	b	b	b	b	b	a	b	a	a	b	a	a	a	b	b	b	a	-	b	b	b	b	a	a	a	b	b	b	a	b
BBMR_11B06	118.135	a	a	a	a	a	b	b	a	a	b	b	a	a	a	a	b	a	a	b	b	b	b	b	a	b	a	a	b	a	a	a	b	b	b	a	b	b	b	b	b	a	a	a	b	b	b	a	b
BBMR_16O21	118.135	a	a	a	a	a	b	b	a	a	-	b	a	a	a	a	b	a	a	b	b	b	b	b	a	b	a	a	-	a	a	a	b	b	b	a	b	b	b	b	b	a	a	a	b	b	b	a	b
group 11+20
BHMR_13J24	0	b	b	b	b	b	a	b	a	b	b	a	a	a	b	a	b	b	a	a	a	a	a	b	b	a	b	a	b	b	a	b	b	a	b	b	a	a	b	b	b	b	a	a	a	b	a	b	b
ABMR_07E12	0	b	b	b	b	b	a	b	a	b	b	a	a	a	b	a	b	b	a	a	a	a	a	b	b	a	b	a	b	b	a	b	b	a	-	b	a	a	b	b	b	b	a	a	a	b	a	b	b
ABMR_01I09	0	b	b	b	b	b	a	b	a	b	b	a	a	a	b	a	b	b	a	a	a	a	a	b	b	a	b	a	b	-	a	b	b	a	-	b	a	a	b	b	b	b	a	a	a	b	a	b	b
CBHMR_09M03	0.838	b	b	b	b	b	a	b	a	b	b	a	a	a	b	a	b	b	a	a	a	a	a	b	b	a	b	a	b	b	a	b	b	a	b	b	a	a	b	b	b	b	a	a	a	b	a	b	b
CBHMR_16E04	0.838	b	b	b	b	b	a	b	a	b	b	a	a	a	b	a	b	b	a	a	a	a	a	b	b	a	b	a	b	b	a	b	b	a	b	b	a	a	b	b	-	b	a	a	a	b	a	b	b
CBHMR_13K14	5.416	b	b	b	b	b	a	b	a	b	b	a	b	b	b	a	b	b	a	a	a	a	a	b	b	a	b	a	b	b	a	b	b	a	b	b	a	a	b	b	b	b	a	a	a	b	a	b	b
BBMR_12L07	7.168	b	b	b	b	b	a	b	b	b	b	a	b	b	b	a	-	a	a	a	a	a	a	b	b	a	b	a	b	-	a	b	b	a	b	b	a	a	b	b	b	b	a	a	a	b	a	b	b
AHMR_02O18	7.168	b	b	b	b	b	a	b	b	-	b	a	b	b	-	a	b	-	a	a	a	a	a	b	b	a	b	a	b	-	-	-	-	a	b	b	a	a	b	b	b	b	a	a	a	b	a	b	b
BHMR_14P18	7.924	b	b	b	b	b	a	b	b	b	b	a	b	b	b	a	b	a	a	a	a	a	a	-	b	a	b	a	b	b	a	b	b	a	b	b	a	a	b	b	b	b	a	a	a	b	a	b	b
CBHMR_16H17	11.343	b	b	b	b	b	a	b	b	b	b	a	b	b	b	a	b	a	-	a	a	a	a	b	b	a	b	b	b	b	a	b	b	a	b	b	a	a	b	b	b	b	a	a	a	b	a	b	b
BHMR_14O19	11.343	b	b	b	b	b	a	b	b	b	b	a	b	b	b	a	b	a	a	a	a	a	a	b	b	a	b	b	b	b	-	b	b	a	b	b	a	a	b	b	b	b	a	a	a	b	a	b	b
BHMR_11K23	11.343	b	b	b	b	b	a	b	b	b	b	a	b	b	b	a	b	a	a	a	a	a	a	b	b	a	b	b	b	b	a	b	b	a	b	b	a	a	b	b	b	b	a	a	a	b	a	b	b
AHMR_04H11	14.691	b	b	b	b	b	a	b	b	b	b	a	b	b	b	a	a	a	a	a	b	a	a	b	b	a	b	b	b	b	a	b	b	a	b	b	a	a	b	b	b	b	a	a	a	b	a	b	b
BHMR_15N23	18.305	b	b	b	b	b	a	b	b	b	b	a	b	b	b	a	a	a	a	a	b	a	a	b	b	a	b	b	b	b	a	b	b	a	b	b	b	a	b	b	b	b	a	a	a	b	a	b	a
CABMR_07L05	50.282	b	a	a	b	a	b	b	b	b	a	a	b	b	a	a	a	a	a	a	b	a	a	b	b	a	b	b	b	b	a	b	b	b	b	b	b	a	a	b	a	b	a	a	a	b	a	b	a
AHMR_04N02	50.282	b	a	a	b	a	b	b	b	b	a	a	b	b	a	a	a	a	a	a	b	a	a	b	b	a	b	b	b	b	a	b	b	b	b	b	b	a	a	b	a	b	a	a	a	b	a	b	a
CAHMR_08H09	50.282	b	a	a	b	a	b	b	b	b	a	a	b	b	a	a	a	a	a	a	b	a	a	b	b	a	b	b	b	b	a	b	b	b	b	b	b	a	a	b	a	b	a	a	a	b	a	b	a
CBHMR_16N16	50.282	b	a	a	b	a	b	b	b	b	a	a	b	b	a	a	a	a	a	a	b	a	-	b	b	a	b	b	b	b	a	b	b	b	b	b	b	a	a	b	a	b	a	a	a	b	a	b	a
AHMR_08M14	50.282	b	a	a	-	a	b	b	b	b	a	a	-	b	a	a	a	a	a	a	b	a	a	b	b	a	b	b	b	b	a	b	b	b	b	b	b	a	a	b	a	b	a	a	-	-	a	b	a
CAHMR_07G23	50.282	b	a	a	b	a	b	-	b	b	a	a	b	-	a	a	a	a	a	a	b	a	a	b	b	a	b	b	b	-	a	b	b	b	b	b	b	a	a	-	a	b	a	a	a	b	a	b	a
CAHMR_08L13	51.919	b	a	a	b	a	b	b	a	a	a	a	b	b	a	a	a	a	a	a	b	a	a	b	b	a	b	b	b	b	a	b	b	b	b	b	b	a	a	b	a	b	a	a	a	b	a	b	a
BHMR_10D09	51.919	b	a	a	b	a	b	b	a	a	a	a	b	b	a	a	a	a	a	a	b	a	a	b	b	a	b	b	b	b	a	b	b	b	b	b	b	a	a	b	a	b	a	a	a	b	a	b	a
BHMR_13J14	51.919	b	a	a	b	a	b	b	a	a	a	a	b	b	a	a	a	a	a	a	b	a	a	b	b	a	b	b	b	b	a	b	b	b	b	b	b	a	a	b	a	b	a	a	a	b	a	b	a
CABMR_08G14	54.567	b	a	a	b	a	b	a	a	a	a	a	b	b	a	a	a	a	a	a	b	a	b	b	b	a	b	b	b	b	a	b	b	b	b	b	b	a	a	b	a	b	a	a	a	b	a	b	a
AHMR_08B07*	54.567	b	a	a	-	a	b	a	a	a	a	a	b	b	a	a	a	a	a	a	b	a	b	b	b	a	b	-	b	b	a	b	b	b	b	b	b	a	a	b	a	b	a	a	a	-	a	b	a
CABMR_04K10	55.188	a	a	a	b	a	b	a	a	a	a	a	b	b	a	a	a	a	a	a	b	a	b	b	b	a	b	b	b	b	a	b	b	b	b	b	b	a	a	b	a	b	a	a	a	b	a	b	a
ABMR_07G04	55.188	a	a	a	b	a	b	a	a	a	a	a	b	b	a	a	a	a	a	a	b	a	b	b	b	a	b	b	b	b	a	b	b	b	b	b	b	a	a	b	a	b	a	a	a	b	a	b	a
AHMR_07A04	56.004	a	a	a	b	a	b	a	a	a	a	a	b	b	a	a	a	a	a	a	b	a	b	b	b	a	b	b	b	b	a	b	b	b	b	b	b	a	a	b	a	b	a	a	a	b	a	b	a
CAHMR_08I06	56.004	a	a	a	b	a	b	a	a	a	a	a	b	b	a	a	a	a	a	a	b	a	b	b	b	a	b	b	b	b	a	b	b	b	b	b	b	a	a	b	a	b	a	a	a	b	a	b	a
BBMR_09F02	56.004	a	a	a	b	a	b	a	a	a	a	a	b	b	a	a	a	a	a	a	b	a	b	b	b	a	b	b	b	b	a	b	b	b	b	b	b	a	a	b	a	b	a	a	a	b	a	b	a
BBMR_11M01	56.004	a	a	a	b	a	b	a	a	a	a	a	b	b	a	a	a	a	a	a	b	a	b	b	b	a	b	b	b	b	a	b	b	b	b	b	b	a	a	b	a	b	a	a	a	b	a	b	a
BBMR_13I24	56.004	a	a	a	b	a	b	a	a	a	a	a	b	b	a	a	a	a	a	a	b	a	b	b	b	a	b	b	b	b	a	b	b	b	b	b	b	a	a	b	a	b	a	a	a	b	a	b	a
BBMR_15L20	56.004	a	a	a	b	a	b	a	a	a	a	a	b	b	a	a	a	a	a	a	b	a	b	b	b	a	b	b	b	b	a	b	b	b	b	b	b	a	a	b	a	b	a	a	a	b	a	b	a
AHMR_07D22*	56.004	a	a	a	b	a	-	a	a	a	a	a	b	b	a	a	a	a	a	a	b	a	b	b	b	a	b	b	b	b	a	b	-	b	b	b	b	a	a	b	a	b	a	a	a	-	-	b	a
BBMR_12H24	56.792	a	a	a	b	a	b	a	a	a	a	a	b	b	a	a	a	a	a	a	b	a	b	b	b	a	b	b	b	b	a	b	b	b	b	b	b	a	a	b	a	b	a	a	a	b	a	b	a
ABMR_01C21	60.66	a	a	a	b	a	b	a	a	a	a	a	b	b	a	a	a	a	a	a	b	a	b	b	b	a	b	b	b	b	a	b	b	b	b	b	b	a	a	b	a	b	a	a	a	b	a	b	a
CABMR_01O17	60.66	a	a	a	b	a	b	a	a	a	a	a	b	b	a	a	a	a	a	a	b	a	b	b	b	a	b	b	b	b	a	b	b	b	b	b	b	a	a	b	a	b	a	a	a	b	a	b	a
ABMR_03G17	60.66	a	a	a	b	a	b	a	a	a	a	a	b	b	a	a	a	a	a	a	b	a	b	b	b	a	b	b	b	b	a	b	b	b	b	b	b	a	a	b	a	b	a	a	a	b	a	b	a
ABMR_06L03	60.66	a	a	a	b	a	b	a	a	a	a	a	b	b	a	a	a	a	a	a	b	a	b	b	b	a	b	b	b	b	a	b	b	b	b	b	b	a	a	b	a	b	a	a	a	b	a	b	a
ABMR_06O04	60.66	a	a	a	b	a	b	a	a	a	a	a	b	b	a	a	a	a	a	a	b	a	b	b	b	a	b	b	b	b	a	b	b	b	b	b	b	a	a	b	a	b	a	a	a	b	a	b	a
ABMR_07F18	60.66	a	a	a	b	a	b	a	a	a	a	a	b	b	a	a	a	a	a	a	b	a	b	b	b	a	b	b	b	b	a	b	b	b	b	b	b	a	a	b	a	b	a	a	a	b	a	b	a
CAHMR_01N23	60.66	a	a	a	b	a	b	a	a	a	a	a	b	b	a	a	a	a	a	a	b	a	b	b	b	a	b	b	b	b	a	b	b	b	b	b	b	a	a	b	a	b	a	a	a	b	a	b	a
CAHMR_08I14	60.66	a	a	a	b	a	b	a	a	a	a	a	b	b	a	a	a	a	a	a	b	a	b	b	b	a	b	b	b	b	a	b	b	b	b	b	b	a	a	b	a	b	a	a	a	b	a	b	a
CAHMR_08M22	60.66	a	a	a	b	a	b	a	a	a	a	a	b	b	a	a	a	a	a	a	b	a	b	b	b	a	b	b	b	b	a	b	b	b	b	b	b	a	a	b	a	b	a	a	a	b	a	b	a
CAHMR_08O05	60.66	a	a	a	b	a	b	a	a	a	a	a	b	b	a	a	a	a	a	a	b	a	b	b	b	a	b	b	b	b	a	b	b	b	b	b	b	a	a	b	a	b	a	a	a	b	a	b	a
AHMR_06J09	60.66	a	-	-	b	a	b	-	a	a	a	a	b	-	a	a	a	a	a	a	b	a	b	-	b	a	-	b	b	b	-	b	-	b	b	b	b	a	a	b	a	b	a	a	a	b	a	-	a
BHMR_14C22	60.66	a	a	a	b	a	b	a	a	a	a	a	b	b	-	a	a	a	a	a	b	a	b	b	b	a	b	b	b	b	a	b	b	b	b	b	b	a	a	b	a	b	a	a	a	b	a	b	a
AHMR_04C03	60.66	a	a	a	b	a	b	a	a	a	a	a	b	b	a	a	a	a	a	a	b	a	b	b	b	a	b	b	b	b	a	b	b	b	b	b	b	a	a	b	a	b	a	a	a	b	a	-	a
ABMR_08M24	60.66	a	a	a	b	a	b	a	a	a	a	a	b	b	a	a	a	a	a	a	b	a	b	b	b	a	b	b	-	b	a	b	b	b	b	b	b	a	a	b	a	b	a	a	a	b	a	b	a
CABMR_01N02	60.66	a	a	-	b	a	b	a	a	a	a	a	b	b	a	a	a	a	a	a	b	a	b	b	b	a	b	b	b	b	a	b	b	b	b	b	b	a	a	b	a	b	a	a	a	-	a	b	a
BHMR_15E05	60.66	a	a	a	b	a	b	a	a	a	a	a	b	b	a	a	a	a	a	a	b	a	b	b	b	a	b	b	b	b	a	b	b	b	b	b	-	a	a	b	a	b	a	a	a	b	a	b	a
BHMR_14I16	60.66	a	a	a	b	a	b	a	a	a	a	a	b	b	a	a	a	a	a	a	b	a	b	b	b	a	b	b	b	b	a	b	b	b	b	b	b	a	a	b	a	b	a	a	a	b	a	b	a
AHMR_01L13	60.66	a	a	a	b	a	b	a	a	a	a	a	b	b	a	a	a	a	a	a	b	a	b	b	b	a	b	b	b	b	a	-	b	b	b	b	b	a	a	b	a	b	a	a	a	b	a	b	a
BBMR_10J03	60.66	a	a	a	b	a	b	a	a	a	a	a	b	b	a	a	a	a	a	a	b	a	b	b	b	a	b	b	b	b	a	b	b	b	b	b	b	a	a	b	a	b	a	a	a	b	a	b	a
AHMR_06L17	60.66	a	a	a	b	a	b	a	a	a	a	a	b	b	a	a	a	a	a	a	b	a	b	b	b	a	b	b	b	b	a	b	b	b	b	b	b	a	a	b	a	b	a	a	a	b	a	b	a
CABMR_08L14	60.66	a	a	a	-	a	b	a	a	a	a	a	b	b	a	a	a	a	a	a	b	a	b	b	b	a	b	b	b	b	a	b	b	b	b	b	b	a	a	b	a	b	a	a	a	b	a	b	a
CBHMR_10E06	60.66	a	a	a	b	a	b	a	a	a	a	a	b	b	a	a	a	a	a	a	b	a	b	b	b	a	b	b	b	b	a	b	b	b	b	b	b	a	a	b	a	b	a	a	a	b	a	b	a
BBMR_12B05	60.66	a	a	a	b	a	b	a	a	a	a	a	b	b	a	a	a	a	a	a	b	a	b	b	b	a	b	b	b	b	a	b	b	b	b	b	b	a	a	b	a	b	a	a	a	b	a	b	a
BBMR_09E23	60.66	a	a	a	b	a	b	a	a	a	a	a	b	b	a	a	a	a	a	a	b	a	b	b	b	a	b	b	b	b	a	b	b	b	b	b	b	a	a	b	a	b	a	a	a	b	a	b	a
ABMR_08O13	61.358	a	a	a	b	a	b	a	a	a	a	a	b	a	a	a	a	a	a	a	b	a	b	b	b	a	b	b	b	b	a	b	b	b	b	b	b	a	a	b	a	b	a	a	a	b	a	b	a
AHMR_03C18	61.678	a	a	a	b	a	b	a	a	a	a	a	b	-	a	a	a	a	a	a	b	a	b	b	b	a	b	b	b	b	a	b	b	b	b	b	b	a	a	b	a	b	a	a	a	b	a	b	a
AHMR_08H04	68.106	a	a	a	b	a	-	a	a	a	a	a	b	a	b	a	a	a	a	a	b	a	b	b	b	a	b	b	b	a	a	b	b	b	b	b	b	a	a	b	a	b	a	a	a	b	a	a	a
AHMR_06K09	68.106	a	a	a	b	a	b	a	a	a	a	a	b	a	b	a	a	a	a	a	b	a	b	b	b	a	b	b	b	a	a	b	-	b	b	b	b	a	a	b	a	b	a	a	a	b	a	a	a
CAHMR_08G14	84.334	a	a	a	b	a	b	b	a	b	b	b	b	a	b	-	a	a	a	b	b	a	b	b	-	a	b	b	b	a	a	b	b	b	b	b	b	a	a	b	a	-	b	a	a	b	a	a	a
BBMR_16H23	86.9	a	a	a	b	a	b	b	a	b	b	b	b	a	b	b	a	a	a	b	b	a	b	b	b	a	b	b	-	-	a	b	b	b	b	b	b	a	a	b	a	b	b	a	a	b	a	a	a
ABMR_01I19	92.075	a	a	a	b	a	b	b	a	b	b	b	b	a	b	b	a	a	a	a	b	a	b	b	b	a	b	b	b	a	a	b	b	b	b	b	b	a	a	b	a	b	b	a	a	a	a	a	b
ABMR_03O07	92.075	a	a	a	b	a	b	b	a	b	b	b	b	a	b	b	a	a	a	a	b	a	b	b	b	a	b	b	b	a	a	b	b	b	b	b	b	a	a	b	a	b	b	a	a	a	a	a	b
ABMR_06N06	92.075	a	a	a	b	a	b	b	a	b	b	b	b	a	b	b	a	a	a	a	b	a	b	b	b	a	b	b	b	a	a	b	b	b	b	b	b	a	a	b	a	b	b	a	a	a	a	a	b
AHMR_02I13	93.251	a	a	a	a	a	b	b	a	b	b	b	b	a	b	b	a	a	a	b	b	a	b	b	b	a	b	b	b	a	a	b	b	b	b	b	b	a	a	b	a	b	b	a	a	a	a	a	b
group 12
ABMR_08O21	0	a	b	a	b	b	b	a	b	a	b	b	b	b	b	b	a	b	b	b	a	a	a	b	a	b	a	a	a	a	b	a	a	a	a	a	b	b	b	a	b	b	a	b	b	a	b	b	a
ABMR_04G24	0	a	b	a	b	b	b	a	b	a	b	b	b	b	b	b	a	b	b	b	a	a	a	b	a	b	a	a	a	a	b	a	a	a	a	a	b	b	b	a	b	b	a	b	b	a	b	b	a
CABMR_08E04	0.852	a	b	a	b	b	b	a	b	a	b	b	b	b	b	b	a	b	b	b	a	a	a	b	a	b	a	a	a	a	b	a	a	a	a	a	b	b	a	a	b	b	a	b	b	a	b	b	a
ABMR_08P15	0.852	a	b	a	b	b	b	a	b	a	b	b	b	b	b	b	a	b	b	b	a	a	a	b	a	b	a	a	a	a	b	a	a	a	a	a	b	b	a	a	b	b	a	b	b	a	b	b	a
ABMR_07G15	0.852	a	b	a	b	b	b	a	b	a	b	b	b	b	b	b	a	b	b	b	a	a	a	b	a	b	a	a	a	a	b	a	a	a	a	a	b	b	a	a	b	b	a	b	b	a	b	b	a
CAHMR_04L02	0.852	a	b	a	b	b	b	a	b	a	b	b	b	b	b	b	a	b	b	b	a	a	a	b	a	b	a	a	a	a	b	a	a	a	a	a	b	b	a	a	b	b	a	b	b	a	b	b	a
ABMR_01B24	0.852	a	b	a	b	b	b	a	b	a	b	b	b	b	b	b	a	b	b	b	a	a	a	b	a	b	a	a	a	a	b	a	a	a	a	a	b	b	a	a	b	b	a	b	b	a	b	b	a
BBMR_12G02	2.425	a	-	a	b	b	b	a	b	a	b	b	b	b	b	b	a	b	b	b	a	a	a	b	a	b	a	a	a	a	b	a	a	a	a	a	b	b	a	a	b	b	a	b	b	a	b	b	a
BHMR_12N03	3.254	a	b	a	b	b	b	a	b	a	b	b	b	b	a	b	a	b	b	b	a	a	a	b	a	b	a	a	a	a	b	a	a	a	a	a	b	b	a	a	b	b	a	b	b	a	b	b	a
BHMR_14A24	3.254	a	b	a	b	b	b	a	b	a	b	b	b	b	a	b	a	b	b	b	a	a	a	b	a	b	a	a	a	a	b	a	a	a	a	a	b	b	a	a	b	b	a	b	b	a	b	b	a
BBMR_12D19	9.958	a	b	a	b	b	b	a	b	a	b	b	b	b	a	b	a	b	b	b	a	a	a	b	a	b	b	a	a	a	b	a	a	a	a	a	b	b	a	a	b	b	a	b	b	a	b	b	a
BHMR_10D07	9.958	a	b	a	b	b	b	a	b	a	b	b	b	b	a	b	a	b	b	b	a	a	a	b	a	b	b	-	a	a	b	a	a	a	a	a	b	b	a	a	b	b	a	b	b	a	b	b	a
BHMR_14E02	22.355	a	b	b	b	b	b	b	b	a	b	b	b	b	a	a	a	a	b	a	a	a	b	b	a	b	b	b	a	a	b	a	a	a	a	a	b	a	a	a	b	b	a	b	b	b	b	a	a
BBMR_09K23	29.12	a	b	b	b	b	a	b	b	a	b	b	b	b	a	a	a	a	b	a	a	a	b	b	a	b	b	b	a	a	b	a	a	a	a	b	b	a	a	a	b	b	a	b	b	b	b	a	a
BHMR_09H11	29.12	a	b	b	b	b	a	b	b	a	b	b	b	b	a	a	a	a	b	a	a	a	b	b	a	b	b	b	a	a	b	a	a	a	a	b	b	a	a	a	b	b	a	b	b	b	b	a	a
CAHMR_05M06	30.701	a	b	b	b	b	a	b	b	a	b	b	b	b	a	a	a	a	b	a	a	a	b	b	a	b	b	b	a	a	b	a	a	a	a	b	b	a	a	a	b	b	a	b	b	b	b	a	a
AHMR_07D16	30.701	a	b	b	b	b	a	b	b	a	b	b	b	b	a	a	a	a	b	a	a	a	b	b	a	b	b	b	a	a	b	a	a	a	a	b	b	a	a	a	b	b	a	b	b	b	b	a	a
ABMR_02M22	30.701	a	b	b	b	b	a	b	b	a	b	b	b	b	a	a	a	a	b	a	a	a	b	b	a	b	b	b	a	a	b	a	a	a	a	b	b	a	a	a	b	b	a	b	b	b	b	a	a
AHMR_05I02	34.874	b	b	b	b	b	a	b	b	a	b	b	b	b	a	a	a	a	b	a	a	a	b	b	b	b	b	b	a	a	b	a	a	a	a	b	b	a	a	a	b	b	a	b	b	b	b	a	a
CAHMR_02M02	40.624	b	b	b	b	b	a	b	b	a	b	b	a	b	a	a	a	a	b	a	a	a	b	b	b	b	b	b	a	a	b	b	a	a	a	b	b	a	a	a	b	b	a	b	b	b	b	a	a
ABMR_08E07	40.624	b	b	b	b	b	a	b	b	a	b	b	a	b	a	a	a	a	b	a	a	a	b	b	b	b	b	-	a	a	b	b	a	a	a	b	b	a	a	a	b	b	a	b	b	b	b	a	a
AHMR_01A13	40.624	b	b	b	b	b	a	b	b	a	b	b	a	b	a	a	a	a	b	a	a	a	b	b	b	b	b	b	a	a	b	b	a	a	a	b	b	a	a	a	b	b	a	b	b	b	b	a	a
group 13
BBMR_12D02	0	b	b	b	b	b	a	a	b	b	b	a	b	b	b	b	a	b	a	b	b	b	a	b	a	a	b	b	b	b	b	b	a	a	b	a	a	a	b	b	a	a	b	b	b	a	b	b	a
BBMR_16H01	0	b	b	b	b	b	a	a	b	b	b	a	b	b	b	b	a	b	a	b	b	b	a	b	a	a	b	b	-	-	b	b	a	a	b	a	a	a	b	b	a	a	b	b	b	a	b	b	a
CAHMR_07H13	0.338	b	b	b	b	b	a	a	b	b	b	a	b	b	b	b	a	b	a	b	b	b	a	b	a	a	b	b	b	b	b	b	a	a	b	b	a	a	b	b	a	a	b	b	b	a	b	b	a
CABMR_06M10	1.148	b	b	b	b	b	a	a	b	b	b	a	b	-	b	b	a	b	a	b	b	a	a	b	a	a	b	b	b	b	b	b	a	a	b	b	a	a	b	b	a	a	b	b	b	a	b	b	a
BHMR_14H02	3.374	b	b	b	b	a	a	a	b	b	b	-	b	b	b	b	a	b	a	b	b	a	a	-	a	a	b	b	-	b	b	b	a	a	b	a	a	a	b	b	a	a	b	b	b	-	-	b	a
BBMR_09P11	3.831	b	b	b	b	a	a	a	b	b	b	a	b	b	b	b	a	b	a	b	b	a	a	b	a	a	b	b	b	b	b	b	a	a	b	a	a	a	b	b	a	a	b	b	b	a	b	b	a
BBMR_11A09	3.831	b	b	b	b	a	a	a	b	b	b	a	b	b	b	b	a	b	a	b	b	a	a	b	a	a	b	b	b	b	b	b	a	a	b	a	a	a	b	b	a	a	b	b	b	a	b	b	a
BBMR_13F14	3.831	b	b	b	b	a	a	a	b	b	b	a	b	b	b	b	a	b	a	b	b	a	a	b	a	a	b	b	b	b	b	b	a	a	b	a	a	a	b	b	a	a	b	b	b	a	b	b	a
BHMR_16G21	3.831	b	b	b	b	a	a	a	b	b	b	a	b	b	-	b	a	b	a	b	b	a	a	b	a	a	b	b	b	b	b	b	a	a	b	a	a	a	b	b	a	a	b	b	b	a	b	b	a
BHMR_15G08	3.831	b	b	b	b	a	a	a	b	b	b	a	b	b	-	b	a	b	a	b	b	a	a	b	a	a	b	b	b	b	-	b	a	a	b	a	a	a	b	b	a	a	b	b	b	a	b	b	a
CABMR_01K07	4.266	b	b	b	b	a	a	a	b	b	b	a	b	b	b	b	a	b	a	b	b	a	a	b	a	a	b	b	b	b	b	b	a	a	b	b	a	a	b	b	a	a	b	b	b	a	b	b	a
AHMR_06F02	4.266	b	b	b	b	a	a	a	b	b	b	a	b	b	b	b	a	b	a	b	b	a	a	b	a	a	b	b	b	b	b	b	a	a	b	b	a	a	b	b	a	a	b	b	b	-	b	b	a
AHMR_07C04	9.873	b	b	b	b	a	a	a	b	a	b	a	b	b	b	b	a	b	a	b	b	a	a	b	a	a	b	b	b	b	b	b	a	a	b	b	a	a	b	b	a	a	b	b	b	-	-	b	a
CBHMR_11E02	18.987	b	b	b	a	a	a	a	b	a	b	a	b	b	b	b	a	b	b	b	b	a	a	b	a	b	a	a	b	b	b	b	a	a	b	a	a	a	b	b	b	a	b	b	b	a	b	b	a
CBHMR_13P14	18.987	b	-	-	a	-	a	-	b	a	b	a	b	-	b	b	a	b	b	b	b	a	a	b	a	b	-	a	b	b	-	b	-	a	b	a	a	a	b	b	b	a	b	b	b	a	b	b	-
CAHMR_04E23	21.06	b	b	b	-	a	a	a	b	a	b	a	b	b	b	b	a	b	b	b	b	a	a	b	a	b	a	a	b	b	b	b	a	a	b	b	a	a	b	b	b	a	b	b	b	a	b	b	a
CBBMR_10A19	21.683	b	b	b	a	a	a	a	b	a	b	a	b	b	b	b	a	b	b	b	b	a	a	b	a	b	a	a	b	b	b	b	a	a	b	a	a	a	b	b	b	a	b	b	b	a	b	b	a
CBBMR_16B20	21.683	b	b	b	a	a	a	a	b	a	b	a	b	b	b	b	a	b	b	b	b	a	a	b	a	b	a	a	b	b	b	b	a	a	b	a	a	a	b	b	b	a	b	b	b	a	b	b	a
CBHMR_11H24	21.683	b	b	b	a	a	a	a	b	a	b	a	b	b	b	b	a	b	b	b	b	a	a	b	a	b	a	a	b	b	b	b	a	a	b	a	a	a	b	b	b	a	b	b	b	a	b	b	a
BHMR_14P04	22.428	b	b	b	a	a	a	a	b	a	b	a	b	b	b	b	a	b	b	b	b	a	a	b	a	b	a	a	b	b	b	b	a	a	b	a	a	a	b	b	b	a	b	b	b	a	b	b	a
BBMR_12B18	25.025	b	b	b	a	a	a	a	b	a	b	a	b	a	b	b	a	b	b	b	b	a	a	b	a	b	a	a	b	b	b	b	a	a	b	a	a	a	b	b	b	a	b	b	b	a	b	b	a
group 14
CABMR_04P01	0	b	a	a	a	a	a	b	b	b	b	b	a	a	b	b	a	b	a	a	b	a	b	b	b	b	b	a	b	b	b	b	b	a	b	a	a	b	a	b	b	a	b	b	b	b	b	a	a
ABMR_07I20	0	b	a	a	a	a	a	b	b	b	b	b	a	a	b	b	a	b	a	a	b	a	b	b	b	b	b	a	b	b	b	b	b	a	b	a	a	b	a	b	b	a	-	b	b	b	b	a	a
CBHMR_14N06	0	b	a	a	a	a	a	b	b	b	b	b	a	a	b	b	a	b	a	a	b	a	b	b	b	b	b	a	b	b	b	b	b	a	b	a	a	b	a	b	b	a	b	b	b	b	b	a	a
BHMR_14N03	0	b	a	a	a	a	a	b	b	b	b	b	a	a	b	b	a	b	a	a	b	a	b	b	b	b	b	a	b	b	b	b	b	a	b	a	a	b	a	b	b	a	b	b	b	b	b	a	a
AHMR_03B22**	22.103	b	a	a	a	a	a	b	a	b	b	b	a	b	b	b	b	b	b	a	b	a	b	a	b	b	b	a	a	b	b	b	b	a	-	b	a	b	a	b	-	a	b	b	b	-	-	b	b
AHMR_06H09**	23.163	b	a	a	a	a	a	b	a	b	b	b	a	b	b	b	b	b	b	a	b	a	b	a	b	b	b	a	a	b	b	b	b	a	b	b	a	b	a	b	a	a	b	a	b	b	b	b	b
CAHMR_05O12**	23.163	b	a	a	a	a	a	b	a	b	b	b	a	b	b	b	b	b	b	a	b	a	b	a	b	b	b	a	a	b	b	b	b	a	-	b	a	b	a	b	-	-	b	-	b	-	b	b	b
ABMR_05A09**	24.016	b	a	a	a	a	a	b	a	b	b	b	a	b	b	b	b	b	b	a	b	a	b	a	b	b	b	a	a	b	b	b	b	a	b	b	a	b	a	b	a	a	b	a	b	b	b	b	b
ABMR_07A02**	27.395	b	b	a	a	a	a	b	a	b	b	b	a	b	b	b	b	b	b	a	b	b	b	a	-	b	b	a	a	b	b	b	b	b	b	b	a	b	a	b	a	a	b	a	b	b	b	b	b
BHMR_15G16***	31.729	b	b	a	b	a	b	b	a	b	b	b	a	b	b	b	b	b	b	a	b	b	b	a	b	b	b	a	a	b	b	b	b	b	b	b	a	b	a	b	a	a	b	a	-	b	b	b	b
BHMR_14D03***	31.729	b	b	a	b	a	b	b	a	b	b	b	a	b	b	b	b	b	b	a	b	b	b	a	b	b	b	a	a	b	b	b	b	b	b	b	a	b	a	b	a	a	b	a	b	b	b	b	b
ABMR_05K01	47.869	a	b	a	b	a	b	a	a	a	b	b	a	b	b	b	b	b	b	a	b	b	b	a	b	b	a	a	a	a	a	b	b	b	b	b	b	b	b	a	a	a	b	a	b	b	a	b	b
CAHMR_05E03	47.869	a	b	a	b	a	b	a	a	a	b	b	a	b	b	b	b	b	b	a	b	b	b	a	b	b	a	a	a	a	a	b	b	b	b	b	b	b	b	a	a	a	b	a	b	b	a	b	b
CAHMR_07G08	47.869	a	b	a	b	a	b	a	a	a	b	b	a	b	b	b	b	b	b	a	b	b	b	a	b	b	a	a	a	a	a	b	b	b	b	b	b	b	b	a	a	a	b	a	b	b	a	b	b
ABMR_04O09	47.869	a	b	a	b	a	b	a	a	a	b	b	a	b	b	b	b	b	b	a	b	b	b	a	b	b	a	a	a	a	a	b	b	b	b	b	b	b	b	a	a	a	b	a	b	b	a	b	b
ABMR_05F11	47.869	a	b	a	b	a	b	a	a	a	b	b	a	b	b	b	b	b	b	a	b	b	b	a	b	b	a	a	a	a	a	b	b	b	b	b	b	b	b	a	a	a	b	a	b	b	a	b	b
ABMR_08D07	47.869	a	b	a	b	a	b	a	a	a	b	b	a	b	b	b	-	b	b	a	b	b	b	a	b	b	a	a	a	a	a	b	b	b	b	b	b	b	b	a	a	a	b	a	b	b	a	b	b
AHMR_03C10	47.869	a	-	a	b	a	b	a	a	a	b	b	a	b	-	b	b	b	b	a	b	b	b	a	b	b	a	a	a	a	a	b	b	b	b	b	b	b	b	a	a	a	b	a	b	b	a	b	b
CAHMR_04I10	49.537	a	b	a	b	a	b	a	a	a	b	b	a	b	b	b	b	b	b	a	b	b	b	a	b	b	a	a	a	a	a	b	b	b	b	b	b	b	b	a	a	a	b	a	b	b	a	b	b
BBMR_12O01	49.537	a	b	a	b	a	b	a	a	a	b	b	a	b	b	b	b	b	b	a	b	b	b	a	b	b	a	a	a	a	a	b	b	b	b	b	b	b	b	a	a	a	b	a	b	b	a	b	b
BBMR_13B08	49.537	a	b	a	b	a	b	a	a	a	b	b	a	b	b	b	b	b	b	a	b	b	b	a	b	b	a	a	a	a	a	b	b	b	b	b	b	b	b	a	a	a	b	a	b	b	a	b	b
BBMR_16F08	49.537	a	b	a	b	a	b	a	a	a	b	b	a	b	b	b	b	b	b	a	b	b	b	a	b	b	a	a	a	a	a	b	b	b	b	b	b	b	b	a	a	a	b	a	b	b	a	b	b
BHMR_14G02	49.537	a	b	a	b	a	b	a	a	-	b	b	a	b	b	b	b	b	b	a	b	b	b	a	b	b	a	a	a	a	a	b	b	b	b	b	b	b	b	a	a	a	b	a	b	b	a	b	b
BHMR_15N21	49.537	-	b	a	b	a	b	a	a	a	b	b	a	b	b	b	b	b	b	a	b	b	b	a	b	b	a	a	a	a	a	b	b	b	b	b	b	b	b	a	a	a	b	a	b	b	a	b	b
BBMR_16N08	49.537	a	b	a	b	a	b	a	a	a	b	b	a	b	b	b	b	b	b	a	b	b	b	a	b	b	a	a	a	a	a	b	b	b	b	b	-	-	b	a	a	a	b	a	-	b	a	b	b
BBMR_10L06	49.537	a	b	a	b	a	b	a	a	a	b	b	a	b	b	b	b	b	b	a	b	b	b	a	b	b	a	a	a	a	a	b	b	b	b	b	b	b	b	a	a	a	b	a	b	b	a	b	b
AHMR_08N24	49.537	a	b	a	b	a	b	a	a	a	b	b	a	b	b	b	b	b	b	a	b	b	b	a	b	b	a	a	a	a	a	b	b	b	b	b	b	b	b	a	a	a	b	a	b	-	a	b	b
BHMR_13M22	51.093	a	b	a	b	a	b	a	a	a	b	b	a	b	b	b	b	b	b	a	b	b	b	a	b	b	a	a	a	a	a	b	b	b	b	b	b	b	b	a	a	a	b	a	b	b	a	b	b
CAHMR_02N09	51.929	a	b	a	b	a	b	a	a	a	b	b	a	b	b	b	b	b	b	a	b	b	b	a	b	b	a	a	a	a	a	b	b	b	a	b	b	b	b	a	a	a	b	a	b	b	a	b	b
CAHMR_05P09	51.929	a	b	a	b	a	b	a	a	a	b	b	a	b	b	b	b	b	b	a	b	b	b	a	b	b	a	a	a	a	a	b	b	b	a	b	b	b	b	a	a	a	b	a	b	b	a	b	b
AHMR_06J03	51.929	a	b	a	b	a	b	a	a	a	b	b	a	b	b	b	b	b	b	a	b	b	b	a	b	b	a	a	a	a	a	b	b	b	a	b	b	b	b	a	a	a	b	a	b	b	a	b	b
CAHMR_07H22	51.929	a	b	a	b	a	b	a	a	a	b	b	a	b	b	b	b	b	b	a	b	b	b	a	b	b	a	a	a	a	a	b	b	b	a	b	b	b	b	a	a	a	b	a	b	b	a	b	b
CAHMR_08B17	51.929	a	b	a	b	a	b	a	a	a	b	b	a	b	b	b	b	b	b	a	b	b	b	a	b	b	a	a	a	a	a	b	b	b	a	b	b	b	b	a	a	a	b	a	b	b	a	b	b
CAHMR_07I22	51.929	a	b	a	b	a	b	a	-	a	b	b	a	b	b	b	b	b	b	a	b	b	b	a	b	b	a	a	a	a	a	b	b	b	a	b	b	b	b	a	a	a	b	a	b	b	a	b	b
BHMR_13L23	51.929	a	b	a	b	a	b	a	a	a	b	b	a	b	b	b	b	b	b	a	b	b	b	a	b	b	a	a	a	a	a	b	b	b	a	b	b	b	b	a	a	a	b	a	b	b	a	b	b
CAHMR_05D06	51.929	a	b	a	b	a	b	a	a	a	b	b	a	-	b	b	b	b	b	a	b	b	b	a	b	b	a	a	a	-	a	-	-	b	a	b	b	b	b	a	a	a	b	a	b	b	a	b	b
BHMR_12K11	51.929	a	b	a	b	a	b	a	a	a	b	b	a	b	b	b	b	-	b	a	b	b	b	a	b	b	a	a	-	a	-	b	b	b	a	b	b	b	b	a	a	a	b	a	b	-	-	b	b
BHMR_10A01	52.311	a	-	a	-	a	-	a	a	a	b	b	a	b	b	-	-	b	b	a	b	-	b	a	b	b	a	a	a	a	a	b	b	b	a	b	b	b	-	a	a	a	b	a	-	b	a	-	b
BHMR_12F17	52.311	a	b	-	b	a	b	a	a	a	b	b	a	-	b	b	b	b	b	a	b	b	b	a	b	b	a	a	-	-	a	b	b	-	-	-	b	b	b	-	a	a	b	a	b	b	a	b	b
AHMR_04P17	57.188	a	b	a	b	a	-	a	a	a	b	b	a	a	b	b	b	b	b	a	b	b	b	a	b	b	a	a	a	a	a	b	b	b	a	b	b	b	b	b	a	a	b	a	b	b	a	b	b
ABMR_01I07	57.188	a	b	a	b	a	b	a	a	a	b	b	a	a	-	b	b	b	b	a	b	b	b	a	b	b	a	a	a	a	a	b	b	b	a	b	b	b	b	b	a	a	b	a	b	b	a	b	b
BHMR_13J18	57.972	a	b	a	b	a	b	a	a	a	b	b	a	a	b	b	b	b	b	a	b	b	b	a	b	b	a	a	a	a	a	b	b	b	a	b	b	b	b	b	a	a	b	a	b	b	a	b	b
ABMR_08M07	57.972	a	b	a	b	a	b	a	a	a	b	b	a	a	b	b	b	b	b	a	b	b	b	a	b	b	a	a	a	a	a	b	b	b	a	b	b	b	b	b	a	a	b	a	b	b	a	b	b
BHMR_14H16	57.972	a	b	a	b	a	b	-	a	a	b	b	a	a	b	b	b	b	b	a	b	b	b	a	b	b	a	a	a	-	a	b	b	b	a	b	b	b	b	b	a	a	b	a	-	b	a	b	b
BHMR_12J06	60.47	a	b	a	b	a	b	a	a	a	b	b	a	a	b	b	b	b	b	a	b	b	b	a	b	b	a	a	a	a	a	b	b	b	a	b	b	b	b	b	a	a	b	a	b	b	a	b	b
BHMR_13A19	60.47	a	b	a	b	a	b	a	a	a	b	b	a	a	b	b	b	b	b	a	b	b	b	a	b	b	a	a	a	a	a	b	b	b	a	b	b	b	b	b	a	a	b	a	b	b	a	b	b
BHMR_14K06	60.47	a	b	a	b	a	b	a	a	a	b	b	a	a	b	b	b	b	b	a	b	b	b	a	b	b	a	a	a	a	a	b	b	b	a	b	b	b	b	b	a	a	b	a	b	b	a	b	b
CBBMR_15P19*	61.3	a	b	a	b	a	b	a	a	a	b	b	a	a	b	b	b	b	b	a	b	b	b	a	b	b	a	a	a	a	a	b	b	b	a	b	b	b	b	b	a	b	b	a	b	b	a	b	b
BHMR_13L20**	63.79	a	b	a	b	a	b	a	a	a	b	b	a	a	b	b	b	b	b	a	b	b	b	a	b	b	a	a	a	a	a	b	b	b	a	b	b	b	b	b	a	b	b	a	b	b	a	b	b
group 15
AHMR_03A21	0	b	b	a	a	b	b	a	b	b	b	a	b	b	b	b	b	a	a	a	a	a	b	b	a	b	b	b	a	a	a	b	a	a	a	b	b	a	b	a	a	a	a	b	b	b	a	b	a
CBBMR_13A04	11.343	a	b	a	b	b	b	a	b	b	b	a	b	b	a	b	a	a	a	a	a	a	b	b	a	b	b	b	a	a	a	b	a	a	a	b	b	a	b	a	a	b	a	b	b	b	a	b	a
CABMR_01O19	27.038	a	a	a	b	b	b	a	b	b	b	a	b	b	a	b	a	a	a	a	b	a	a	b	a	b	b	b	a	a	b	b	a	b	-	b	b	a	b	a	a	b	b	b	b	b	a	b	a
AHMR_08O09	46.468	a	a	a	b	a	a	a	a	a	b	a	-	b	a	b	a	a	a	a	b	a	a	a	a	a	b	a	a	a	b	b	a	b	a	b	b	a	b	b	a	b	b	b	b	b	b	b	a
AHMR_02C18	48.303	a	a	a	b	a	a	a	a	a	b	a	a	b	a	a	a	a	a	a	b	a	a	a	a	a	b	a	a	a	b	a	a	b	a	b	b	a	b	b	a	b	b	b	b	b	b	b	a
BHMR_12O10*	49.57	a	a	a	b	a	a	a	a	a	b	a	a	b	-	a	a	a	a	a	b	a	a	a	a	a	b	a	a	-	b	a	a	b	a	b	b	a	b	b	a	b	b	b	b	b	b	b	a
AHMR_05G11	54.331	a	a	a	b	a	a	b	a	a	b	a	a	b	a	a	a	a	a	a	b	a	a	a	a	a	b	a	a	a	b	a	a	b	a	b	b	b	b	b	a	b	b	b	b	a	b	b	a
CAHMR_03M24	54.905	a	a	a	b	a	a	b	a	a	b	a	a	b	a	a	a	a	a	a	b	a	a	a	a	a	b	a	a	a	b	a	a	b	a	b	b	b	b	b	a	b	b	b	b	a	b	b	a
CABMR_06K02	54.905	a	a	a	b	a	a	b	a	a	b	a	a	b	a	a	a	a	a	a	b	a	a	a	a	a	b	a	a	a	b	a	a	b	a	b	b	b	b	b	a	b	b	b	b	a	b	b	a
CAHMR_03F08	55.116	a	a	a	b	a	a	b	a	a	b	a	a	b	a	a	a	a	a	a	b	a	a	a	a	a	b	a	a	a	b	a	a	b	a	b	b	b	b	b	a	b	b	b	b	a	b	b	a
ABMR_02F13	55.402	a	a	a	b	a	a	b	a	a	b	a	a	b	a	a	a	a	a	a	b	a	a	a	a	a	b	a	a	a	b	a	a	b	a	b	b	b	b	b	a	b	b	b	b	a	b	b	a
AHMR_01F19	55.402	a	a	a	b	a	a	b	a	a	b	a	a	b	a	a	a	a	a	a	b	a	a	a	a	a	b	a	a	a	b	a	a	b	a	b	b	b	b	b	a	b	b	b	b	a	b	b	a
ABMR_03K03	55.402	a	a	a	b	a	a	b	a	a	b	a	a	b	a	a	a	a	a	a	b	a	a	a	a	a	b	a	a	a	b	a	a	b	a	b	b	b	b	b	a	b	b	b	b	a	b	b	a
AHMR_05F05	55.402	a	a	a	b	a	a	b	a	a	b	a	a	b	a	a	a	a	a	a	b	a	a	a	a	a	b	a	a	a	b	a	a	b	a	b	b	b	b	b	a	b	b	b	b	a	b	b	a
AHMR_08M10	55.402	a	a	a	b	a	a	-	a	a	b	a	a	b	a	a	a	a	a	a	b	a	a	a	a	a	b	a	a	a	b	a	a	b	a	b	b	b	b	b	a	b	b	b	b	a	b	b	a
ABMR_01F24	55.402	a	a	a	b	a	a	b	a	a	b	a	a	-	a	a	a	a	a	a	b	a	a	a	a	a	b	a	a	a	b	a	a	b	a	b	b	b	b	b	a	b	b	b	b	a	b	b	a
AHMR_08G10	55.402	a	a	a	b	a	a	b	a	a	-	a	a	b	a	a	a	a	a	a	b	a	a	a	a	a	b	a	a	a	b	a	a	b	a	b	b	b	b	b	a	b	b	b	b	a	-	b	a
BHMR_12A06	57.262	a	a	a	b	a	a	b	a	a	b	a	a	b	-	a	a	a	a	a	b	a	a	a	a	a	b	a	a	a	b	a	a	b	a	b	b	b	b	b	a	b	b	b	b	a	b	b	a
BBMR_12A06	57.514	a	a	a	b	a	a	b	a	a	b	a	a	b	a	a	a	a	a	a	b	a	a	a	a	a	b	a	a	a	b	a	a	b	a	b	b	b	b	b	a	b	b	b	b	a	b	b	a
BHMR_14K24	57.514	a	a	a	b	a	a	b	a	a	b	a	a	b	a	a	a	a	a	a	b	a	a	a	a	a	b	a	a	a	b	a	a	b	a	b	b	b	b	b	a	b	b	b	b	a	b	b	a
CBHMR_13F13*	57.514	a	a	a	b	a	a	b	a	a	b	a	a	b	a	a	a	a	a	a	b	a	a	a	a	a	b	a	a	a	b	a	a	b	a	b	b	b	b	b	a	b	b	b	b	a	b	b	a
BHMR_11K22	57.514	a	-	-	b	a	a	b	a	a	b	a	a	b	a	a	a	-	a	a	b	a	a	a	a	-	-	a	a	a	b	a	a	b	a	b	b	b	b	b	a	b	b	b	b	a	b	b	a
BBMR_13L16*	57.928	a	a	a	b	a	a	b	a	a	b	a	a	b	a	a	a	a	a	a	b	a	a	a	a	a	b	a	a	a	b	a	a	b	a	b	b	b	b	b	a	b	b	b	b	a	b	b	a
BBMR_14D23*	57.928	a	a	a	b	a	a	b	a	a	b	a	a	b	a	a	a	a	a	a	b	a	a	a	a	a	b	a	a	a	b	a	a	b	a	b	b	b	b	b	a	b	b	b	b	a	b	b	a
BHMR_12P11*	57.928	a	a	a	b	a	a	b	a	a	b	a	a	b	a	a	a	a	a	a	b	a	a	a	a	a	b	a	a	a	b	a	a	b	a	b	b	b	b	b	a	b	b	b	b	a	b	b	a
BHMR_13F18*	57.928	a	a	a	b	a	a	b	a	a	b	a	a	b	a	a	a	a	a	a	b	a	a	a	a	a	b	a	a	a	b	a	a	b	a	b	b	b	b	b	a	b	b	b	b	a	b	b	a
BHMR_14J07*	57.928	a	a	a	b	a	a	b	a	a	b	a	a	b	a	a	a	a	a	a	b	a	a	a	a	a	b	a	a	a	b	a	a	b	a	b	b	b	b	b	a	b	b	b	b	a	b	b	a
CBHMR_09D13	63.083	a	b	a	b	a	a	b	a	a	b	a	a	b	a	a	a	a	-	a	b	a	a	a	a	a	b	a	a	a	b	a	-	b	a	b	b	b	b	b	a	b	-	b	b	-	-	b	a
group 16
CAHMR_07I02	0	a	b	a	a	b	b	b	a	b	b	a	b	a	a	a	b	b	b	b	b	a	b	b	b	b	a	b	b	a	a	a	a	a	a	a	a	b	a	b	b	b	a	a	a	b	b	b	b
AHMR_03N13	0	a	b	a	a	b	b	b	a	b	b	a	b	a	a	a	-	b	b	b	b	a	b	b	b	b	a	b	b	a	a	a	a	a	a	a	a	b	a	b	b	b	a	a	a	b	b	b	b
AHMR_05P19	14.56	a	b	a	a	b	a	-	b	b	b	a	b	a	a	a	a	b	b	b	b	a	b	a	b	a	b	b	b	a	a	a	a	a	b	a	a	a	a	a	b	b	a	a	a	-	-	b	-
ABMR_01M15	25.436	a	b	a	b	b	a	b	b	a	b	a	a	a	a	a	a	b	b	b	b	a	b	a	b	a	b	b	b	a	a	b	a	a	-	a	a	a	a	a	a	b	b	a	a	b	b	b	b
AHMR_08J04	26.554	a	b	a	b	b	a	b	b	a	b	a	a	a	a	a	a	b	b	b	b	a	b	a	b	a	b	b	b	a	a	-	a	a	b	a	a	a	a	a	a	b	b	a	a	b	b	b	b
ABMR_06L18	36.345	a	b	a	b	b	a	b	b	a	b	a	a	a	a	a	a	a	b	b	b	b	b	a	b	a	b	b	b	b	a	b	a	a	b	a	a	a	a	a	a	b	b	a	a	b	a	b	b
CAHMR_06H07	37.141	a	b	a	b	b	a	b	b	a	b	a	a	a	a	a	a	a	b	b	b	b	b	a	b	a	b	b	b	b	a	b	a	a	b	a	a	-	a	a	a	b	b	a	a	b	a	b	b
CAHMR_03K05	37.141	a	b	a	b	b	a	-	b	a	b	a	a	a	a	a	a	a	b	b	b	b	b	a	b	a	b	b	b	b	a	b	a	a	b	a	a	a	a	a	a	b	b	a	a	b	a	b	b
CABMR_06L09	37.951	a	b	a	b	b	a	b	b	a	b	a	a	a	a	a	a	a	b	b	b	b	b	a	b	a	b	b	b	b	a	b	a	a	b	a	a	a	a	a	a	b	b	a	a	b	a	b	b
CABMR_07M19	37.951	a	b	a	b	b	a	b	b	a	b	a	a	a	a	a	a	a	b	b	b	b	b	a	b	a	b	b	b	b	a	b	a	a	b	a	a	a	a	a	a	b	b	a	a	b	a	b	b
CAHMR_07C05	37.951	a	b	a	b	b	a	b	b	a	b	a	a	a	a	a	a	a	b	b	b	b	b	a	b	a	b	b	b	b	a	b	a	a	b	a	a	a	a	a	a	b	b	a	a	b	a	b	b
CBBMR_09P05	37.951	a	b	a	b	b	a	b	b	a	b	a	a	a	a	a	a	a	b	b	b	b	b	a	b	a	b	b	b	b	a	b	a	a	b	a	a	a	a	a	a	b	b	a	a	b	a	b	b
CBHMR_10B06	37.951	a	b	a	b	b	a	b	b	a	b	a	a	a	a	a	a	a	b	b	b	b	b	a	b	a	b	b	b	b	a	b	a	a	b	a	a	a	a	a	a	b	b	a	a	b	a	b	b
CBHMR_13N15	37.951	a	b	a	b	b	a	b	b	a	b	a	a	a	a	a	a	a	b	b	b	b	b	a	b	a	b	b	b	b	a	b	a	a	b	a	a	a	a	a	a	b	b	a	a	b	a	b	b
BHMR_12C09	37.951	a	b	a	b	b	a	b	b	a	b	a	a	a	a	a	a	a	b	b	b	b	b	a	b	a	b	b	b	b	a	b	a	a	b	a	a	a	a	a	a	b	-	a	a	b	a	b	b
CBHMR_16L14	37.951	a	b	a	b	b	a	b	b	a	b	-	a	a	a	a	a	a	b	b	b	b	b	a	b	a	b	b	b	-	a	b	a	a	b	a	a	a	a	a	a	b	b	a	a	b	a	b	b
CABMR_04O18	43.807	a	b	a	b	b	a	b	b	a	b	a	a	a	a	a	a	a	b	b	b	b	b	a	b	a	b	b	b	b	a	b	a	a	b	a	a	a	a	a	a	b	b	a	a	b	a	a	b
CABMR_06N13	43.807	a	b	a	b	b	a	b	b	a	b	a	a	a	a	a	a	a	b	b	b	b	b	a	b	a	b	b	b	b	a	b	a	a	b	a	a	a	a	a	a	b	b	a	a	b	a	a	b
BBMR_15A14	43.807	a	b	a	b	b	a	b	b	a	b	a	a	a	a	a	a	a	b	b	b	b	b	a	b	a	b	b	b	b	a	b	a	a	b	a	a	a	a	a	a	b	b	a	a	b	a	a	b
CAHMR_07J01	47.139	a	b	a	b	b	a	b	b	a	b	a	a	a	a	a	a	a	b	b	b	b	b	a	b	a	b	b	b	b	a	b	a	a	b	a	a	a	a	a	a	b	b	b	a	a	a	a	b
BBMR_11H02	47.139	a	b	a	b	b	a	b	b	a	b	a	a	a	a	a	a	a	b	b	b	b	b	a	b	a	b	b	b	b	a	b	a	a	b	a	a	a	a	a	a	b	b	b	a	a	a	a	b
BBMR_12N12	47.139	a	b	a	b	b	a	b	b	a	b	a	a	a	a	a	-	a	b	b	b	b	b	a	b	a	b	b	b	b	a	b	a	a	b	a	a	a	a	a	a	b	b	b	a	a	a	a	b
BBMR_09O19	47.717	a	b	a	b	b	a	b	b	a	b	a	a	b	a	a	a	a	b	b	b	b	b	a	b	a	b	b	b	b	a	b	a	a	b	a	a	a	a	a	a	b	b	b	a	a	a	a	b
BBMR_12N19	47.717	a	b	a	b	b	a	b	b	a	b	a	a	b	a	a	a	a	b	b	b	b	b	a	b	a	b	b	b	b	a	b	a	a	b	a	a	a	a	a	a	b	b	b	a	a	a	a	b
BHMR_09H06	47.717	a	b	a	b	b	a	b	b	a	b	a	a	b	a	a	a	a	b	b	b	b	b	a	b	a	b	b	b	b	a	b	a	a	b	a	a	a	a	a	a	b	b	b	a	a	a	a	b
CAHMR_03N21	47.717	a	b	a	b	b	a	b	b	a	b	a	a	b	a	a	a	a	b	b	b	b	b	a	b	a	b	b	b	b	a	b	a	a	b	a	a	a	a	a	a	b	b	b	a	a	a	a	b
CMAT	47.717	a	b	a	b	b	a	b	b	a	b	a	a	b	a	a	a	a	b	b	b	b	b	a	b	a	b	b	b	b	a	b	a	a	b	a	a	a	a	a	a	b	b	b	a	a	a	a	b
BBMR_14G04	47.717	a	b	a	b	b	a	b	b	a	b	a	a	b	a	a	a	a	b	b	b	b	b	a	b	a	b	b	b	b	a	b	a	a	b	a	a	a	a	a	a	b	b	b	a	a	a	a	b
BHMR_10P01	47.717	a	b	a	b	b	a	b	b	a	b	a	a	b	a	a	a	a	b	b	b	b	b	a	b	a	b	b	b	b	a	b	a	a	b	a	a	a	a	a	a	b	b	b	a	a	a	a	b
ABMR_01K14	48.524	a	b	a	b	b	a	b	b	a	b	a	a	b	a	a	a	a	b	b	b	b	b	b	b	a	b	b	b	b	a	b	a	a	b	a	a	a	a	a	a	b	b	b	a	a	a	a	b
ABMR_06G17	48.524	a	b	a	b	b	a	b	b	a	b	a	a	b	a	a	a	a	b	b	b	b	b	b	b	a	b	b	b	b	a	b	a	a	b	a	a	a	a	a	a	b	b	b	a	a	a	a	b
AHMR_08B23	59.323	a	a	a	b	b	a	a	b	a	b	a	a	a	a	a	a	a	b	a	b	b	b	b	b	a	a	b	b	a	a	b	a	a	b	a	a	b	a	b	b	b	b	b	a	a	a	a	b
BHMR_12B16	59.323	a	a	a	b	b	a	-	b	a	b	a	a	a	a	a	a	a	b	a	b	b	b	b	b	a	-	b	b	a	a	b	a	a	b	a	a	b	a	b	b	b	b	b	a	a	a	a	b
CAHMR_02O22	60.165	a	a	a	b	b	a	a	b	a	b	a	a	a	a	a	a	a	b	a	b	b	b	b	b	a	a	b	b	a	a	b	a	a	b	a	a	b	a	b	b	b	b	b	a	a	a	a	b
Cag-0009	60.165	a	a	a	b	b	a	a	b	a	b	a	a	a	a	a	a	a	b	a	b	b	b	b	b	a	a	b	b	a	a	b	a	a	b	a	a	b	a	b	b	b	b	b	a	a	a	a	b
ABMR_04K05	60.165	a	a	a	b	b	a	a	b	a	b	-	a	a	a	a	a	a	b	a	b	b	b	b	b	a	a	b	b	a	a	b	a	a	b	a	a	b	a	-	b	b	b	b	a	a	a	a	b
ABMR_03A22	61.005	a	a	a	b	b	a	a	b	a	b	a	a	a	a	a	a	a	b	a	b	b	b	b	b	a	a	b	b	a	a	b	a	a	b	a	a	b	a	b	b	b	b	b	a	a	a	a	b
ABMR_08H21	61.005	a	a	a	b	b	a	a	b	a	b	a	a	a	a	a	a	a	b	a	b	b	b	b	b	a	a	b	b	a	a	b	a	a	b	a	a	b	a	b	b	b	b	b	a	a	a	a	b
CABMR_06L08	61.005	a	a	a	b	b	a	a	b	a	b	a	a	a	a	a	a	a	b	a	b	b	b	b	b	a	a	b	b	a	a	b	a	a	b	a	a	b	a	b	b	b	b	b	a	a	a	a	b
ABMR_08H07	68.909	a	a	a	b	b	a	a	b	a	b	a	a	a	a	a	a	a	b	a	b	b	b	b	b	a	a	b	b	a	a	b	b	a	b	a	a	b	a	b	b	b	b	b	a	a	b	a	a
AHMR_04A17	100.047	b	b	a	b	a	a	a	a	b	b	b	b	a	a	a	b	a	b	a	b	b	a	b	a	a	a	b	a	a	a	b	b	a	a	a	a	b	b	b	b	a	b	b	a	a	b	a	a
AHMR_02K20	100.047	b	b	a	b	a	a	a	a	b	b	b	b	a	a	a	b	a	b	a	b	b	a	b	a	a	a	b	a	a	a	b	b	a	a	a	a	b	b	b	b	a	b	b	a	a	b	a	a
group 18+19
ABMR_05J12	0	a	b	b	b	a	a	a	b	b	b	a	a	a	b	a	a	a	a	a	b	a	a	a	a	b	a	-	b	b	a	a	a	b	a	b	a	a	b	b	a	b	b	a	b	b	b	a	b
ABMR_05N11	0	a	b	b	b	a	a	a	b	b	b	a	a	a	b	a	a	a	a	a	b	a	a	a	a	b	a	b	b	b	a	a	a	b	a	b	a	a	b	b	a	b	b	a	b	b	b	a	b
CBBMR_09L05	0	a	b	b	b	a	a	a	b	b	b	a	a	a	b	a	-	a	a	a	b	a	a	a	a	b	a	b	b	b	a	a	a	b	-	b	a	a	b	b	a	b	b	a	b	b	b	a	b
CBBMR_09J03	6.725	a	b	b	b	a	a	a	b	b	b	a	a	a	b	b	a	a	a	a	b	a	a	a	a	b	a	b	b	a	a	a	a	b	a	b	a	a	b	b	a	b	b	a	b	b	b	a	b
BBMR_10C17	6.725	a	b	b	b	a	a	a	b	b	b	a	a	a	b	b	a	a	a	a	b	a	a	a	a	b	a	b	b	a	a	a	a	b	a	b	a	a	b	b	a	b	b	a	b	b	b	a	b
BBMR_10H21	6.725	a	b	b	b	a	a	a	b	b	b	a	a	a	b	b	a	a	a	a	b	a	a	a	a	b	a	b	b	a	a	a	a	b	a	b	a	a	b	b	a	b	b	a	b	b	b	a	b
BBMR_13A16	6.725	a	b	b	b	a	a	a	b	b	b	a	a	a	b	b	a	a	a	a	b	a	a	a	a	b	a	b	b	a	a	a	a	b	a	b	a	a	b	b	a	b	b	a	b	b	b	a	b
AHMR_02A08	6.725	a	b	b	b	a	a	a	b	b	b	a	a	a	b	-	a	a	a	a	b	a	a	a	a	-	a	b	b	a	a	a	a	b	a	b	a	a	b	b	a	b	b	a	b	b	b	a	b
BBMR_09D02	8.375	a	b	b	b	a	a	a	b	b	b	a	a	a	b	b	a	a	a	a	b	a	a	a	a	b	a	b	b	a	a	a	a	b	a	b	a	a	b	b	a	b	b	a	b	b	b	a	b
ABMR_06E19	8.375	a	b	b	b	a	a	a	b	b	b	a	a	a	b	b	a	a	a	a	b	a	a	a	a	b	a	b	b	a	a	a	a	b	a	b	a	a	b	b	a	b	-	a	b	b	b	a	b
CAHMR_03N24	10.034	a	b	b	b	a	a	a	b	b	b	a	a	a	b	b	a	a	a	a	b	a	a	a	a	b	a	b	b	a	a	a	a	b	a	b	a	a	b	b	a	b	b	a	b	b	b	a	b
CAHMR_08B22	15.978	a	b	b	b	a	a	a	b	b	a	a	a	a	b	b	a	a	a	a	b	a	a	a	-	b	a	b	b	a	a	b	a	a	b	b	a	a	b	b	a	b	b	a	b	b	b	a	b
AHMR_05I22	15.978	a	b	b	b	a	a	a	b	b	a	-	a	a	b	b	a	a	a	a	b	a	-	a	-	b	a	b	b	a	a	b	a	-	-	b	a	a	-	b	a	b	b	a	-	-	b	a	b
CBHMR_12H11	20.252	a	b	b	b	b	a	a	b	b	a	b	a	a	b	b	a	a	a	a	b	a	b	a	a	b	a	b	b	a	a	b	a	a	b	b	a	a	b	b	a	b	b	a	b	b	b	a	b
BBMR_13A05	20.252	a	b	b	b	b	a	a	b	b	a	b	a	a	b	b	a	a	a	a	b	a	b	a	a	b	a	b	b	a	a	b	a	a	b	b	a	a	b	b	a	b	b	a	b	b	b	a	b
AHMR_05K12	20.252	a	b	b	b	b	a	a	b	b	a	b	a	a	b	b	a	a	a	a	-	a	b	a	a	b	a	b	b	a	a	b	a	a	b	b	a	a	b	b	a	-	b	-	b	b	b	a	b
BBMR_16P13	32.832	a	b	b	b	b	a	a	b	b	a	b	a	a	b	b	a	a	a	b	b	a	b	a	a	b	a	b	b	a	a	b	a	a	b	a	b	a	b	b	b	b	a	a	b	b	a	a	b
ABMR_06P06*	34.591	a	b	b	b	b	a	a	b	b	a	b	a	a	b	b	a	a	a	b	b	a	b	a	a	b	a	b	b	a	a	b	a	a	b	a	b	a	b	b	b	b	a	a	b	b	a	a	b
ABMR_06I16**	45.691	a	b	b	b	b	a	a	b	a	a	b	a	b	b	b	a	a	a	b	b	a	b	a	b	b	a	b	b	a	a	b	a	a	b	a	b	a	b	b	b	b	a	a	b	b	a	a	b
BBMR_10L20****	47.308	a	b	b	b	b	a	a	b	a	a	b	a	b	b	b	a	a	a	b	b	a	b	a	b	b	a	b	b	a	a	b	a	a	b	a	b	a	b	b	b	b	a	a	b	b	a	b	b
BHMR_12N12***	47.308	a	b	-	b	b	a	a	b	a	a	b	a	b	b	b	a	a	a	b	b	a	b	a	b	b	a	b	b	a	a	b	a	a	b	a	b	a	b	b	b	b	a	a	b	b	a	b	b
AHMR_05E23**	48.984	a	b	b	b	b	a	a	b	a	a	b	a	b	b	b	a	a	a	b	b	a	b	a	b	b	a	b	b	a	a	b	a	a	b	a	b	a	a	b	b	b	a	a	b	b	a	b	b
AHMR_06F12**	48.984	a	b	b	b	b	a	a	b	a	a	b	a	b	b	b	a	a	a	b	b	a	b	a	b	b	a	b	b	a	a	b	a	a	b	a	b	a	a	b	-	b	a	a	b	b	a	b	b
BHMR_11J23***	48.984	a	b	-	b	b	a	-	b	a	a	b	a	b	b	b	a	a	a	b	b	a	b	a	b	b	a	b	b	a	a	b	a	a	b	a	b	a	a	b	b	b	a	a	b	b	a	b	b
BHMR_14N09***	48.984	a	b	b	b	b	a	a	b	a	a	b	a	b	b	b	a	a	a	b	b	a	b	-	b	b	a	b	b	a	a	b	a	a	b	a	b	a	a	b	b	b	a	a	b	b	a	b	b
BBMR_11B03**	49.822	a	b	b	b	b	a	a	b	a	a	b	a	b	b	b	a	a	a	b	b	a	b	a	b	b	a	b	b	a	a	b	a	a	b	a	b	a	a	b	b	b	a	a	b	b	a	b	b
BHMR_14L13*	63.509	a	b	b	b	b	a	a	b	a	a	b	a	b	b	b	a	a	a	b	b	a	b	a	b	b	a	b	b	a	b	a	a	b	b	a	b	a	a	b	b	a	a	b	b	a	a	b	b
ABMR_08N09*	64.355	a	b	b	b	b	a	a	b	a	a	b	a	b	b	b	a	a	a	b	b	a	b	a	b	b	a	b	b	a	b	a	a	b	b	a	b	a	a	b	b	a	b	b	b	a	a	b	b
BBMR_11P20	65.211	a	b	b	b	b	a	a	b	a	a	b	a	b	b	b	a	a	a	b	b	a	b	a	b	b	a	b	b	a	b	a	a	b	b	a	b	a	a	b	b	a	b	b	b	a	a	b	b
BBMR_13I21*	65.211	a	b	b	b	b	a	a	b	a	a	b	a	b	b	b	-	a	a	b	b	a	b	a	b	b	a	b	b	a	b	a	a	b	b	a	b	a	a	b	b	a	b	b	b	a	a	b	b
CHMR_09D04	66.871	a	b	b	b	b	a	a	b	a	a	b	a	b	b	b	a	a	a	b	b	a	b	a	b	b	a	b	b	a	b	a	a	b	b	a	b	a	a	b	b	a	b	b	b	a	a	b	b
CHMR_10D17	66.871	a	b	b	b	b	a	a	b	a	a	b	a	b	b	b	a	a	a	b	b	a	b	a	b	b	a	b	b	a	b	a	a	b	b	a	b	a	a	b	b	a	b	b	b	a	a	b	b
CBBMR_13P16	69.301	a	b	b	b	b	a	a	b	a	a	b	a	b	b	b	a	a	a	b	b	a	b	a	b	b	a	b	b	a	b	a	a	b	b	a	b	a	a	a	b	a	b	b	b	a	a	b	b
BBMR_09F08	72.604	a	b	b	b	b	a	a	b	a	a	b	a	b	b	b	a	a	a	b	b	a	b	a	b	b	b	b	b	-	b	a	a	b	b	a	b	a	a	a	b	a	b	b	b	a	a	b	b
ABMR_05B15	73.429	a	b	b	b	b	a	a	b	a	a	b	a	b	b	b	a	a	a	b	b	a	b	a	b	b	b	b	b	a	b	a	a	b	b	a	b	b	a	a	b	a	b	b	b	a	a	b	b
ABMR_02E22*	74.262	a	b	b	b	b	a	a	b	a	a	b	a	b	b	b	a	b	a	b	b	a	b	a	b	b	b	b	b	a	b	a	a	b	b	a	b	b	a	a	b	a	b	b	b	a	a	b	b
BHMR_16F09*	74.262	a	b	b	b	b	a	a	b	a	a	b	a	b	b	b	a	b	a	b	b	a	b	a	b	b	b	b	b	a	b	a	a	b	b	a	b	b	a	a	b	a	b	b	b	a	a	b	b
BHMR_12G12*	74.262	a	b	b	b	b	a	a	b	a	a	b	a	b	b	b	a	b	a	b	b	a	b	a	b	b	b	b	b	a	b	a	a	b	b	a	b	b	a	a	b	a	-	b	b	a	a	b	b
BHMR_11G23**	74.262	a	b	b	b	b	a	a	b	-	-	b	-	b	b	b	a	b	a	b	b	a	b	a	b	b	b	b	b	a	b	a	a	b	b	a	b	b	a	a	b	a	b	b	b	a	a	b	b
BHMR_14L19	74.262	a	b	-	b	b	a	a	b	a	a	b	a	b	b	b	a	b	a	b	b	a	b	a	b	b	b	b	b	a	b	a	a	b	b	a	b	b	a	a	b	a	b	b	b	a	a	b	b
BBMR_09H11*	74.262	a	b	b	b	b	a	a	b	a	a	b	a	b	b	b	a	b	a	b	b	a	b	a	b	b	b	b	b	a	b	a	a	b	b	a	b	b	a	a	b	a	b	b	b	a	a	b	b
AHMR_05G04	74.262	a	-	b	b	b	a	a	b	a	a	b	-	b	b	b	a	b	a	b	b	a	b	a	b	b	b	b	b	a	-	a	a	b	b	a	b	b	a	a	b	a	-	b	b	a	a	b	b
AHMR_05C17*	74.262	a	b	b	b	b	a	-	b	a	a	b	a	-	b	b	a	b	a	b	b	a	b	a	b	b	-	b	b	-	-	-	-	b	b	a	b	b	a	a	b	a	b	b	b	a	a	-	b
CABMR_06P15**	76.716	a	b	b	b	b	a	a	b	a	a	b	a	b	b	b	a	b	a	b	b	b	b	a	b	b	b	b	b	a	b	a	a	b	b	a	b	b	a	a	b	a	b	b	b	a	a	b	b
ABMR_01O07**	76.716	a	b	b	b	b	a	a	b	a	a	b	a	b	b	b	a	b	a	b	b	b	b	a	b	b	b	-	b	a	b	a	a	b	b	a	b	b	a	a	b	a	b	b	b	a	-	b	b
CAHMR_01A08	76.716	a	b	b	b	b	a	a	-	a	a	b	a	b	b	b	a	b	a	b	b	b	b	a	b	b	b	b	b	a	b	a	a	b	b	a	-	b	a	a	b	a	b	b	b	a	a	-	b
CABMR_07E19*	76.716	a	b	b	b	b	a	a	b	a	a	b	a	b	b	b	a	b	a	b	b	b	b	a	b	b	b	-	b	a	b	a	a	b	-	a	b	b	a	a	b	a	b	b	b	a	a	b	b
CAHMR_01C07*	76.716	a	b	b	b	b	a	a	b	a	a	b	a	b	b	b	a	b	a	b	b	b	b	a	b	b	b	b	b	a	-	a	a	b	b	a	b	b	a	a	b	a	b	b	b	a	a	b	b
ABMR_01K10*	76.716	a	b	b	b	b	a	a	b	a	a	b	a	b	b	b	a	b	a	b	b	b	b	a	b	b	b	b	b	a	b	a	a	b	b	a	b	b	a	a	b	a	b	b	b	a	a	b	b
CAHMR_05M17**	76.716	a	b	b	b	b	a	a	b	a	a	b	a	b	b	b	a	b	a	b	b	b	b	a	b	b	b	b	b	a	b	a	a	b	b	a	b	b	a	a	b	a	b	b	b	a	a	b	b
AHMR_01D11**	78.406	a	b	b	b	b	a	a	b	a	a	b	a	b	b	b	a	b	a	b	b	b	b	b	b	b	b	b	b	a	b	a	a	b	b	a	b	b	a	a	b	a	b	b	b	a	a	b	b
CAHMR_06G21	89.859	a	b	b	b	b	a	a	b	a	a	b	b	b	b	b	a	b	b	a	b	b	b	b	b	b	b	b	b	a	b	a	a	b	b	a	a	b	a	b	b	a	b	b	b	a	a	b	b
CAHMR_07P17	89.859	a	b	b	b	b	a	a	b	a	a	b	b	b	b	b	a	b	b	a	b	b	b	b	b	b	b	b	b	a	b	a	a	b	b	a	a	b	a	b	b	a	b	b	b	a	a	b	b
BBMR_10B08	90.695	a	b	b	b	b	a	a	b	a	a	b	b	b	b	b	a	b	b	a	b	b	b	b	b	b	b	b	b	a	b	a	a	b	b	a	a	b	a	b	b	a	b	b	a	a	a	b	b
BHMR_09K13	90.695	a	b	b	b	b	a	a	b	a	a	b	b	b	b	b	a	b	b	a	b	b	b	b	b	b	b	b	b	a	b	a	a	b	b	a	a	b	a	b	b	a	b	b	a	a	a	b	b
BHMR_13F22	90.695	a	b	b	b	b	a	a	b	a	a	b	b	b	b	b	a	b	b	a	b	b	b	b	b	b	b	b	b	a	b	a	a	b	b	a	a	b	a	b	b	a	b	b	a	a	a	b	b
BHMR_16E05	90.695	-	b	b	b	b	a	a	b	a	a	b	b	b	b	b	a	b	b	a	b	b	b	b	b	b	b	b	b	a	b	a	a	b	b	a	a	b	a	b	b	a	b	b	a	a	a	b	b
ABMR_02P08	97.837	a	b	b	b	b	b	a	b	a	a	a	b	b	a	b	a	b	b	a	b	b	b	b	b	b	b	b	b	a	b	a	a	b	b	a	a	b	a	b	b	a	b	b	a	a	b	b	a
ABMR_06D16	97.837	a	b	b	b	b	b	a	b	a	a	a	b	b	a	b	a	b	b	a	b	b	b	b	b	b	b	b	b	a	b	a	a	b	b	a	a	b	a	b	b	a	b	b	a	a	b	b	a
BBMR_15P09	97.837	a	b	b	b	b	b	a	b	a	a	a	b	b	a	b	a	b	b	a	b	b	b	b	b	b	b	b	b	a	b	a	a	b	b	a	a	b	a	b	b	a	b	b	a	a	b	b	a
ABMR_02L22	97.837	a	b	b	b	b	b	a	b	a	a	a	b	b	a	b	a	b	b	a	b	b	b	b	b	b	b	b	b	a	b	a	a	b	b	a	a	b	a	b	b	a	b	b	a	a	b	b	a
CAHMR_04G23	99.369	a	b	b	b	b	b	a	b	a	a	a	-	b	a	b	a	b	b	a	b	b	b	b	b	b	b	b	b	a	b	a	a	b	b	a	a	b	a	b	b	a	b	b	a	a	b	b	a
CBHMR_10B07	106.865	a	b	a	b	b	b	a	b	b	a	a	b	a	a	b	a	b	b	a	b	b	b	b	b	b	b	b	-	a	b	a	a	b	b	a	a	b	a	b	b	a	a	b	a	-	-	b	a
CABMR_05B21	129.979	a	b	a	a	b	b	a	b	b	a	a	b	a	a	a	b	a	b	a	a	b	a	b	a	b	a	b	b	b	a	a	b	a	a	a	a	b	a	b	b	a	a	b	a	a	b	b	a
group 21
CAHMR_05E06***	0	b	b	a	b	a	b	b	b	a	a	b	b	a	b	a	b	b	a	b	b	b	b	a	b	b	a	b	a	b	b	b	b	a	b	b	b	b	b	b	b	a	a	a	b	b	b	a	a
AHMR_08A13**	0	b	b	a	b	a	b	b	b	a	a	b	b	a	b	a	b	b	a	b	b	b	b	a	b	b	a	b	a	b	b	b	b	a	-	b	b	b	b	b	b	a	a	a	-	b	b	a	a
ABMR_04G07***	3.293	b	b	a	b	a	b	b	a	a	a	b	b	a	b	a	b	b	a	b	b	b	b	a	b	b	a	b	a	b	b	b	b	b	-	b	b	b	b	b	b	a	a	a	b	b	b	a	a
CAHMR_06B02**	3.293	-	b	a	b	a	b	b	a	a	a	b	b	a	b	a	b	b	a	b	b	b	b	a	b	b	a	b	a	b	b	b	b	b	b	b	b	b	b	b	b	a	a	a	b	b	b	a	a
CABMR_07P03**	4.934	b	b	a	b	a	b	b	a	a	a	b	b	a	b	a	b	b	a	b	b	b	b	a	b	b	a	b	a	b	b	b	b	b	-	b	b	b	b	b	b	a	a	a	b	b	b	a	a
CABMR_04K19***	8.298	b	b	a	b	a	b	b	a	a	a	b	b	a	b	a	b	a	a	b	b	b	b	a	b	b	a	b	a	b	b	b	b	b	b	b	b	b	b	b	b	b	a	a	b	b	b	a	a
CAHMR_05C20***	8.298	b	b	a	b	a	b	b	a	a	a	b	b	a	b	a	b	a	a	b	b	b	b	a	b	b	a	b	a	b	b	b	b	b	b	b	b	b	b	b	b	b	a	a	b	b	b	a	a
CAHMR_02P01***	8.298	b	b	a	b	a	b	b	a	a	a	b	b	a	b	a	b	a	a	b	b	b	b	a	b	b	a	b	a	b	b	b	b	b	b	b	b	b	b	b	b	b	a	a	b	b	b	a	a
CABMR_07N05***	8.298	b	b	a	b	a	b	b	a	a	a	b	b	a	b	a	b	a	a	b	b	b	b	a	b	b	a	b	a	b	b	b	b	b	b	b	b	b	b	b	b	b	a	a	b	b	b	a	a
CABMR_01E02****	8.968	b	b	a	b	a	b	b	a	a	a	b	b	a	b	a	b	a	a	b	b	b	b	a	b	b	a	b	a	-	b	b	b	b	b	b	b	b	b	b	b	b	a	-	b	b	b	a	a
CAHMR_05K11**	10.402	b	b	a	b	a	b	b	a	a	a	b	b	a	b	a	b	a	a	b	b	b	b	a	b	b	a	b	a	b	b	b	b	b	b	b	b	b	b	b	b	b	a	a	b	b	b	a	a
CAHMR_03I02**	10.402	b	b	a	b	a	b	b	a	a	a	b	b	a	b	a	b	a	a	b	b	b	b	a	b	b	a	b	a	b	b	b	b	b	b	b	b	b	b	b	b	b	a	a	b	b	b	a	a
BBMR_14H01	19.127	b	b	a	b	a	a	b	a	a	a	a	a	a	b	a	a	a	a	b	b	b	b	a	b	b	a	b	a	b	b	a	b	b	b	b	a	b	b	b	b	b	a	a	b	a	b	a	a
CHMR_13O04	19.127	b	b	a	b	a	a	b	a	a	-	a	a	a	b	a	a	a	a	b	b	b	b	a	b	b	a	b	a	b	b	a	b	b	b	b	a	b	b	b	b	b	a	-	b	a	b	a	a
BBMR_09B07	21.045	b	b	a	b	a	a	b	a	a	a	a	a	a	b	a	a	a	a	b	b	b	b	a	b	b	a	b	a	b	b	a	b	b	b	b	a	b	b	b	b	b	a	a	b	a	b	a	a
group 23
CABMR_08K24	0	b	b	b	b	b	b	a	a	a	a	b	b	a	a	a	a	a	a	a	b	b	b	a	b	a	a	b	b	b	a	a	b	a	b	b	a	a	a	a	b	a	a	b	a	a	b	b	a
BBMR_11I21	0	b	b	b	b	b	b	a	a	a	a	b	b	a	a	a	a	a	a	a	b	b	b	a	b	a	a	b	b	b	a	a	b	a	b	b	a	a	a	a	b	a	a	-	a	a	b	b	a
BBMR_12P21	0	b	-	b	b	b	b	a	a	a	a	b	b	a	a	a	a	a	a	a	b	b	b	a	b	a	a	b	b	b	a	a	b	a	b	b	a	a	a	a	b	a	a	b	a	a	b	b	a
CBBMR_09C04	3.294	b	b	b	b	b	b	a	a	a	b	b	b	a	a	a	a	a	a	a	b	b	b	a	b	a	a	b	b	b	a	a	b	a	b	b	a	a	a	a	b	a	a	b	a	a	b	b	a
CABMR_07M04	8.306	b	b	a	b	b	b	a	a	a	b	b	b	a	a	a	a	a	a	a	b	b	b	a	b	a	b	b	b	b	a	a	b	a	b	b	a	a	a	a	b	a	a	b	a	a	b	b	a
AHMR_07M03	8.306	b	b	a	b	b	b	a	a	a	b	b	b	a	a	a	a	a	a	a	b	b	b	a	b	a	b	b	b	b	a	a	b	a	b	b	a	a	a	a	b	a	a	b	a	a	b	b	a
CABMR_03B13	8.306	b	b	a	b	b	b	a	a	a	b	b	b	a	a	a	a	a	a	a	b	b	b	a	b	a	b	b	b	b	a	a	b	a	b	b	a	a	a	a	b	a	a	b	a	a	b	b	a
BBMR_11M24	8.306	b	b	a	b	b	b	a	a	a	b	b	b	a	a	a	a	a	a	a	b	b	b	a	b	a	b	b	b	b	a	a	b	a	b	b	a	a	a	a	b	a	a	b	a	a	b	b	a
BBMR_12H08	8.306	b	b	a	b	b	b	a	a	a	b	b	b	-	a	a	a	a	a	a	b	b	b	a	b	a	b	b	b	b	a	a	b	a	b	b	a	a	a	a	b	a	a	b	a	a	b	b	a
CABMR_03H14	27.104	b	b	a	b	b	b	a	b	a	b	b	b	a	a	a	b	a	a	a	a	b	a	a	b	a	b	b	a	b	a	a	b	a	b	b	a	b	a	b	b	a	a	b	a	a	b	b	a
ABMR_08F19	27.995	b	b	a	b	b	b	a	b	a	b	b	b	a	a	a	b	a	a	a	a	b	a	a	b	a	b	b	a	b	a	a	b	a	b	b	a	b	a	b	b	a	a	b	a	a	a	b	a
BHMR_14O03	34.889	b	b	a	b	b	b	a	b	a	b	b	b	a	a	b	b	a	a	a	a	b	a	a	b	a	b	b	a	a	a	a	b	a	b	b	a	b	a	b	b	a	a	a	a	a	a	b	b
BHMR_15D13	34.889	b	b	a	b	b	b	a	b	a	b	b	b	a	a	b	b	a	a	a	a	b	a	a	b	a	b	b	a	a	a	a	b	a	b	b	a	b	a	b	b	a	a	a	a	a	a	b	b
AHMR_02M23	37.414	b	b	a	b	b	b	a	b	a	b	b	b	a	a	b	b	a	a	a	a	b	a	b	b	a	b	b	a	a	a	a	b	a	b	b	a	b	a	-	b	a	a	a	a	a	a	b	b
BHMR_13B03	44.154	b	b	b	b	b	b	a	b	a	b	a	b	a	a	b	b	a	a	a	a	b	a	b	b	a	b	b	a	a	a	a	b	a	b	b	a	b	a	b	b	a	a	a	b	a	a	b	b
AHMR_06B15	47.097	b	-	b	b	b	b	a	b	a	b	a	b	a	a	b	b	a	a	a	a	b	a	b	b	a	b	b	a	a	a	b	a	a	b	b	a	b	a	b	b	a	a	a	b	a	a	-	b
BHMR_10C06	48.197	b	a	b	b	b	b	a	b	a	b	a	a	a	a	b	b	a	a	a	a	b	a	b	b	a	b	b	a	a	a	b	a	a	b	b	a	b	a	b	b	a	a	a	b	a	a	b	b
AHMR_03B19	48.197	b	a	b	b	b	b	a	b	a	b	a	a	a	a	b	b	a	a	a	a	b	a	b	b	a	b	b	a	a	a	b	a	a	b	b	a	b	a	b	b	a	a	a	b	a	a	b	b
CABMR_01L15	48.197	b	a	b	b	b	b	a	b	a	b	a	a	a	a	b	-	a	a	a	a	b	a	b	b	a	b	b	a	a	a	b	a	a	b	b	a	b	a	b	b	a	a	a	b	a	a	b	b
CAHMR_07D17	48.197	b	a	b	b	b	b	a	b	a	b	a	-	-	a	b	b	-	a	-	-	b	a	b	b	a	b	b	a	a	a	b	a	a	b	b	a	b	a	b	b	a	a	a	b	a	a	b	b
CBHMR_09I05	49.03	b	a	b	b	b	b	a	b	a	b	a	a	a	a	b	b	a	a	a	a	b	a	b	b	a	b	b	a	a	a	b	a	a	b	b	a	b	a	b	b	a	a	a	b	a	a	b	b
BBMR_13F21	49.03	b	a	b	b	b	b	a	b	a	b	a	a	a	a	b	b	a	a	a	a	b	a	b	b	a	b	b	a	a	a	b	a	a	b	b	a	b	a	b	b	a	a	a	b	a	a	b	b
BHMR_15K19	49.03	b	a	b	b	b	b	a	b	a	b	a	a	a	a	b	b	a	a	a	a	b	a	b	b	a	b	b	a	a	a	b	-	a	b	b	a	b	a	b	b	a	a	a	b	a	a	b	b
CBHMR_16P06	49.03	b	a	b	b	b	b	a	b	a	b	a	a	a	a	b	b	a	a	a	a	b	a	b	b	a	b	b	a	a	a	b	a	a	b	b	a	b	a	b	b	a	a	a	b	a	a	b	b
CBHMR_09D14	49.03	b	a	b	b	b	b	a	b	a	b	a	a	a	a	b	b	a	a	a	a	b	a	b	b	a	b	b	a	a	a	b	a	a	b	b	a	b	a	b	b	a	a	a	b	a	a	b	b
ABMR_06B05	49.863	b	a	b	b	b	b	a	b	a	b	a	a	a	a	b	b	a	a	a	a	b	a	b	b	a	b	b	a	a	a	b	a	a	b	b	a	b	a	b	b	a	a	a	b	a	a	b	b
ABMR_03L24	51.574	b	a	b	b	b	b	a	b	a	b	a	a	a	a	b	b	a	a	a	a	b	a	b	b	a	b	b	a	a	a	b	a	a	b	b	a	b	a	b	b	a	a	a	b	a	a	b	b
CABMR_05L23	57.347	b	a	b	b	b	b	b	b	a	b	a	a	a	a	b	b	a	a	a	a	b	a	b	b	a	b	b	a	a	a	b	a	a	b	b	a	b	a	b	b	a	a	a	b	a	a	b	b
BHMR_13B24	57.347	b	a	b	b	b	b	b	b	a	b	a	a	a	a	b	b	a	a	a	a	b	a	b	b	a	b	b	a	a	a	b	a	a	b	b	a	b	a	b	b	a	a	a	b	a	a	b	b
CABMR_08L05	57.347	b	a	b	b	b	b	b	b	a	b	a	a	a	a	b	-	a	a	a	a	b	a	b	b	a	b	-	a	a	a	b	a	a	-	b	a	b	a	b	b	a	a	a	b	a	a	b	b
BBMR_13E08	65.002	b	a	b	b	b	b	b	b	a	b	a	a	a	b	b	b	a	a	a	a	b	a	b	b	a	b	b	a	a	a	b	a	a	a	a	b	b	a	b	b	a	a	a	b	a	a	b	b
CBBMR_16B03	65.002	b	a	b	b	b	b	b	b	a	b	a	a	a	b	b	b	a	a	a	a	b	a	b	b	a	b	b	a	a	a	b	a	a	a	a	b	b	a	b	b	a	a	a	b	a	a	b	b
BBMR_10P16	77.06	b	a	b	b	b	b	b	b	a	a	a	a	a	b	b	b	a	a	a	a	b	a	b	b	a	a	b	a	a	a	b	a	a	-	a	b	b	b	b	b	a	a	a	a	a	b	a	b
AHMR_01K10	77.06	b	a	-	b	b	b	b	b	a	a	a	a	a	b	b	b	a	a	a	a	b	a	b	b	a	-	b	a	-	a	b	a	a	a	a	b	b	b	-	-	a	a	a	-	a	b	a	b
CABMR_07E18	92.609	b	a	b	b	b	b	b	a	a	a	b	a	a	b	a	b	a	a	a	a	a	a	a	a	a	a	b	a	a	a	b	a	a	a	a	b	b	b	b	a	b	b	a	a	a	b	a	b
group A
CABMR_03I13	0	b	b	b	a	a	b	a	a	b	b	b	a	a	b	b	a	a	a	a	b	b	b	b	a	b	a	a	a	b	a	a	a	a	a	a	a	a	b	a	a	b	a	a	b	b	a	b	a
BBMR_10N17	0	b	b	b	a	a	b	a	a	b	b	b	a	a	b	b	a	a	a	a	b	b	b	b	a	b	a	a	a	b	a	a	a	a	a	a	a	a	b	a	a	b	a	a	b	b	a	b	a
BHMR_15J21	0	b	b	b	a	a	b	a	a	b	b	b	a	a	b	b	a	a	a	a	b	b	b	b	a	b	a	a	a	b	a	a	a	a	a	a	a	a	b	a	a	b	a	a	b	b	a	b	a
BHMR_12K02	0	b	b	b	a	a	b	a	a	b	b	b	a	a	b	b	a	a	-	a	b	b	b	b	a	b	a	a	a	b	a	a	a	a	a	a	a	a	b	a	a	b	a	a	b	b	a	b	a
CAHMR_05N09	0	b	b	b	a	a	b	a	a	b	b	b	a	a	b	b	a	a	a	a	b	b	b	b	a	b	a	a	a	b	a	a	a	a	a	a	a	a	b	a	a	b	a	a	b	b	a	-	a
BBMR_13A02	0	b	b	b	a	a	b	a	a	b	b	b	a	a	b	b	a	a	a	a	b	b	b	b	a	b	a	a	a	b	a	a	a	a	a	a	a	a	b	a	a	b	a	a	b	b	a	b	a
BHMR_15I10	0	b	b	b	a	a	b	a	a	b	b	b	a	a	b	b	a	a	a	a	b	b	b	b	a	b	a	a	a	b	a	a	a	a	a	a	a	a	b	a	a	b	a	a	b	-	a	b	a
CBHMR_10I02	0.816	b	b	b	a	a	b	a	a	b	b	b	a	a	b	b	a	a	a	a	b	b	b	a	a	b	a	a	a	b	a	a	a	a	a	a	a	a	b	a	a	b	a	a	b	b	a	b	a
CBHMR_10J13	0.816	b	b	b	a	a	b	a	a	b	b	b	a	a	b	b	a	a	a	a	b	b	b	a	a	b	a	a	a	b	a	a	a	a	a	a	a	a	b	a	a	b	a	a	b	b	a	b	a
BHMR_13E22	0.816	b	b	b	a	a	b	a	a	b	b	b	a	a	b	b	a	a	a	a	b	b	b	a	a	b	a	a	a	b	a	a	a	a	a	a	a	a	b	a	a	b	a	a	b	b	a	b	a
CBHMR_14H18	0.816	b	b	b	a	a	b	a	a	b	b	b	a	a	b	b	a	a	a	a	b	b	b	a	a	b	a	a	a	b	a	a	a	a	a	a	a	a	b	a	a	b	a	a	b	b	a	b	a
CAHMR_08C07	0.816	b	b	b	a	a	b	a	a	b	b	b	a	a	b	b	a	a	a	a	b	b	b	a	a	b	a	a	a	b	a	a	a	a	a	a	a	a	b	a	a	b	a	a	b	b	a	b	a
BHMR_09L17	0.816	b	b	b	a	a	-	a	a	b	b	b	a	a	b	b	a	a	a	a	b	b	b	a	a	b	a	a	a	b	a	a	a	a	a	a	a	a	b	a	a	b	a	a	b	b	a	b	a
CABMR_06P08	1.631	b	b	b	a	a	b	a	a	b	b	b	a	a	b	b	a	a	a	a	b	b	b	a	a	b	a	a	a	b	a	a	a	a	a	a	a	a	b	a	a	b	a	a	b	b	a	b	a
CABMR_03J20	4.08	b	b	b	b	a	b	a	a	b	b	b	a	a	b	b	a	a	a	a	b	b	b	a	b	b	a	a	a	b	a	a	a	a	a	a	a	a	b	a	a	b	a	a	b	b	a	b	a
CAHMR_08L11	4.08	b	b	b	b	a	b	a	a	b	b	b	a	a	b	b	a	a	a	a	b	b	b	a	b	b	a	a	a	b	a	a	a	a	a	a	a	a	b	a	a	b	a	a	b	b	a	b	a
BHMR_11D14	4.747	b	b	b	b	a	b	a	a	b	b	b	a	a	b	b	a	a	-	a	b	b	b	a	b	b	a	a	a	b	a	a	a	a	a	a	a	a	b	a	a	b	a	a	b	b	a	b	a
BHMR_12F10	10.849	b	b	b	b	a	b	a	a	b	b	b	a	a	b	b	a	a	b	a	b	b	b	a	b	b	a	a	a	b	a	b	a	a	a	a	a	a	b	a	a	b	a	b	b	a	a	b	a
CABMR_01E03	14.294	b	b	b	b	a	b	a	a	b	b	b	a	a	b	b	a	a	b	a	b	b	b	a	b	b	a	a	a	a	a	b	a	a	a	a	a	a	b	a	a	-	a	b	a	a	a	b	a
ABMR_04J03	14.294	b	b	b	b	a	b	a	a	b	b	b	a	a	b	b	a	a	b	a	b	b	b	a	b	b	a	a	a	a	a	b	a	a	a	a	a	a	b	a	a	b	a	b	a	a	a	b	a
BBMR_14J08	14.294	b	b	b	b	a	b	a	a	b	b	b	a	a	b	b	a	a	b	a	b	b	b	a	b	b	a	a	a	a	a	b	a	a	a	a	a	a	b	a	a	b	a	b	-	a	a	b	a
BBMR_15L24	14.294	b	b	b	b	a	b	a	a	b	b	b	a	-	b	b	a	a	b	a	b	b	b	a	b	b	a	a	a	a	a	b	a	a	a	a	a	a	b	a	a	b	a	b	a	a	a	b	a
CABMR_01O20	14.294	b	b	b	b	a	b	a	a	b	b	b	a	a	b	b	a	a	b	a	b	b	b	a	b	b	a	a	a	a	a	b	a	a	a	a	a	a	-	a	a	b	a	b	a	a	a	b	a
ABMR_03G20	14.294	b	b	b	b	a	b	a	a	b	b	b	a	a	b	b	a	a	b	a	b	b	b	a	b	b	a	a	a	a	a	b	a	a	-	a	a	a	b	a	a	b	a	b	a	a	a	b	a
CAHMR_04I12	14.294	b	b	-	b	a	b	a	a	b	b	b	a	a	b	b	a	a	b	a	-	b	b	a	b	b	a	a	a	a	a	b	a	a	a	a	a	a	b	a	a	b	a	b	a	a	a	b	a
CAHMR_03F10	14.294	b	b	-	b	a	-	a	a	b	b	b	a	a	-	b	a	a	b	a	b	b	b	a	b	b	a	a	a	a	a	b	a	a	a	a	a	a	b	a	a	b	a	b	a	a	a	b	a
ABMR_02O21	14.294	b	b	b	b	a	b	a	a	b	b	b	a	a	b	b	a	a	b	a	b	b	b	a	b	b	a	a	a	a	a	b	a	a	a	a	a	a	b	a	a	b	a	b	a	a	a	b	a
BHMR_09F24	29.854	b	b	b	b	a	b	a	a	b	b	b	a	a	b	a	a	a	b	a	b	b	b	a	b	b	a	a	a	a	a	b	a	a	a	a	a	a	a	-	a	a	b	b	a	a	a	a	a
BHMR_13N18**	55.281	b	a	a	b	a	a	a	a	b	a	b	a	b	a	a	a	b	b	a	a	a	b	a	a	b	a	a	a	a	a	a	a	a	b	a	a	b	a	a	a	a	b	b	a	a	a	a	a
CBBMR_10B23**	55.281	b	a	a	b	a	a	a	a	b	a	b	a	b	a	a	a	b	b	a	a	a	b	a	a	b	a	a	a	a	a	a	a	a	b	a	a	b	a	a	a	a	b	b	a	a	a	a	a
CBBMR_15O14*	55.281	b	a	a	b	a	a	a	a	b	a	b	a	b	a	a	a	b	b	a	a	a	b	a	a	b	a	a	a	a	a	a	a	a	b	a	a	b	a	a	a	a	b	b	a	a	a	a	a
BHMR_09O17	60.415	b	-	a	b	a	a	a	-	b	b	b	a	b	-	a	a	b	b	-	b	a	b	b	a	b	a	a	a	a	a	a	-	a	b	a	a	b	a	a	a	-	b	b	-	-	a	a	a
group B
CABMR_01C12	0	b	a	b	a	a	b	a	a	b	a	a	a	a	b	b	b	b	a	a	b	a	b	b	b	a	b	b	a	a	b	b	b	b	b	a	a	b	b	a	b	b	a	a	b	b	b	a	a
CABMR_04N23	0	b	a	b	a	a	b	a	a	b	a	a	a	a	b	b	b	b	a	a	b	a	b	b	b	a	b	b	a	a	b	b	b	b	b	a	a	b	b	a	b	b	a	a	b	b	b	a	a
BHMR_12A11	10.17	b	b	a	a	a	b	a	a	b	a	a	a	a	b	b	b	b	a	a	b	a	b	b	b	a	b	b	a	a	a	b	b	b	b	a	a	b	b	a	b	b	a	a	a	b	b	a	a
ABMR_04L19	17.04	b	b	b	a	a	b	b	a	b	a	a	a	a	b	b	b	b	a	a	b	a	a	b	b	a	b	b	a	a	a	b	b	a	b	a	a	b	b	a	b	b	a	a	b	b	b	a	a
BHMR_14H15	19.293	b	b	a	a	a	b	b	a	b	a	a	a	a	b	b	b	b	a	a	b	a	a	b	b	a	b	b	a	a	a	b	b	a	b	a	-	b	b	a	b	b	-	a	a	b	b	-	a
BHMR_12N16	23.965	b	-	-	a	a	b	-	a	b	a	a	a	-	b	b	b	b	a	a	b	a	a	b	b	a	-	b	a	b	-	b	-	a	b	a	a	b	b	a	b	b	a	a	a	b	b	a	-
BBMR_14L11	24.907	b	b	a	a	a	b	b	a	b	a	a	a	a	b	b	b	b	a	a	b	a	a	b	b	a	b	b	a	b	a	b	a	a	b	a	a	b	b	a	b	b	a	a	a	b	b	a	a
ABMR_03O10	27.613	b	b	b	a	a	b	b	a	b	a	a	a	a	b	b	b	b	a	a	b	a	a	b	b	a	b	b	a	b	a	b	a	a	b	a	a	b	b	a	b	b	a	a	b	b	b	a	a
ABMR_03P20	27.613	b	b	b	a	a	b	b	a	b	a	a	a	a	b	b	b	b	a	a	b	a	a	b	b	a	b	b	a	b	a	b	a	a	b	a	a	b	b	a	b	b	a	a	b	b	b	a	a
ABMR_04I16	27.613	b	b	b	a	a	b	b	a	b	a	a	a	a	b	b	b	b	a	a	b	a	a	b	b	a	b	b	a	b	a	b	a	a	b	a	a	b	b	a	b	b	a	a	b	b	b	a	a
ABMR_07I11	27.613	b	b	b	a	a	b	b	a	b	a	a	a	a	b	b	b	b	a	a	b	a	a	b	b	a	b	b	a	b	a	b	a	a	b	a	a	b	b	a	b	b	a	a	b	b	b	a	a
ABMR_07M08	27.613	b	b	b	a	a	b	b	a	b	a	a	a	a	b	b	b	b	a	a	b	a	a	b	b	a	b	b	a	b	a	b	a	a	b	a	a	b	b	a	b	b	a	a	b	b	b	a	a
AHMR_03K18	27.613	b	b	b	a	a	b	b	a	b	a	a	a	a	b	b	b	b	a	a	b	a	a	b	b	a	b	b	a	b	a	b	a	a	b	a	a	b	b	a	b	b	a	a	b	b	b	a	a
AHMR_04L05	27.613	b	b	b	a	a	b	b	a	b	a	a	a	a	b	b	b	b	a	a	b	a	a	b	b	a	b	b	a	b	a	b	a	a	b	a	a	b	b	a	b	b	a	a	b	b	b	a	a
AHMR_05D01	27.613	b	b	b	a	a	b	b	a	b	a	a	a	a	b	b	b	b	a	a	b	a	a	b	b	a	b	b	a	b	a	b	a	a	b	a	a	b	b	a	b	b	a	a	b	b	b	a	a
AHMR_05K06	27.613	b	b	b	a	a	b	b	a	b	a	a	a	a	b	b	b	b	a	a	b	a	a	b	b	a	b	b	a	b	a	b	a	a	b	a	a	b	b	a	b	b	a	a	b	b	b	a	a
CAHMR_07E02	27.613	b	b	b	a	a	b	b	a	b	a	a	a	a	b	b	b	b	a	a	b	a	a	b	b	a	b	b	a	b	a	b	a	a	b	a	a	b	b	a	b	b	a	a	b	b	b	a	a
AHMR_02L02	27.613	b	b	b	a	a	b	-	a	-	a	a	a	a	-	b	b	b	a	a	b	a	a	b	b	a	b	-	a	b	a	b	a	a	b	a	a	b	b	a	b	b	a	a	-	b	b	a	a
AHMR_01H09	27.613	b	b	b	a	a	b	b	a	-	a	a	a	a	-	b	b	b	a	a	b	a	-	b	b	a	b	b	a	b	a	b	a	a	b	a	a	b	b	a	b	b	a	a	-	b	b	a	a
AHMR_06I12	27.613	b	b	-	-	a	b	b	a	b	a	a	a	a	b	b	b	b	a	a	-	a	a	b	b	a	b	b	a	b	a	b	a	a	b	a	a	b	b	a	b	b	a	a	b	b	b	a	a
CAHMR_02A19	27.613	b	b	b	a	a	b	b	a	b	a	a	a	a	b	b	b	b	a	a	b	a	a	b	b	a	b	b	a	b	a	b	a	a	b	a	a	b	b	a	b	b	a	a	b	b	b	a	a
AHMR_01D07	27.613	b	b	b	a	a	b	b	a	b	a	a	a	a	b	b	b	b	a	a	b	a	a	b	b	a	b	b	a	b	a	b	a	a	b	a	a	-	b	a	b	b	a	a	b	b	b	a	a
ABMR_06E16	27.613	b	b	b	a	a	b	b	a	b	a	a	a	a	b	b	b	b	a	a	b	a	a	b	b	a	b	b	a	b	a	b	a	a	b	a	a	b	b	a	b	b	a	a	b	b	b	a	a
AHMR_06C14	27.613	b	b	b	a	a	b	b	a	b	a	a	a	a	b	b	b	b	a	a	b	a	a	b	b	a	b	b	a	b	a	b	a	a	b	a	a	b	b	a	b	b	a	a	b	b	b	a	a
AHMR_04I20	27.613	b	b	b	a	a	b	b	a	b	a	a	a	a	b	b	b	b	a	a	b	a	a	b	b	a	b	b	a	b	a	b	a	a	b	a	a	b	b	a	b	b	a	a	b	b	b	a	a
AHMR_03N09	27.613	b	b	-	a	a	b	b	a	b	a	a	a	a	b	b	b	b	a	a	b	a	a	b	b	a	b	b	a	b	a	b	a	a	b	a	a	b	b	a	b	b	a	a	b	b	b	a	a
ABMR_01O03	27.613	b	b	b	a	a	b	b	a	b	a	a	a	a	b	b	b	b	a	a	b	a	a	b	b	a	b	b	a	b	a	b	a	a	-	a	a	b	b	a	b	b	a	a	b	b	b	a	a
AHMR_05O01	27.613	b	b	b	a	a	b	b	a	b	a	a	a	a	b	b	b	b	-	a	b	a	a	b	b	a	b	b	a	b	a	b	a	a	b	a	a	b	b	a	b	b	a	a	b	b	b	a	a
ABMR_08E05	27.613	b	b	b	a	a	b	b	a	b	a	a	a	a	b	b	b	b	a	a	b	a	a	b	b	a	b	-	a	b	a	b	a	a	b	a	a	b	b	a	b	b	a	a	b	b	b	a	a
ABMR_02L14	27.613	b	b	b	a	a	b	b	a	b	a	a	a	a	b	b	b	b	a	a	b	a	a	b	b	a	b	b	a	b	a	b	a	a	b	a	a	b	b	a	b	b	a	a	b	b	b	a	a
AHMR_08J17	27.613	b	b	b	a	a	b	b	a	b	a	a	a	a	b	b	b	b	a	a	b	a	a	b	b	a	b	b	a	b	a	b	a	a	b	a	a	b	b	a	b	b	a	a	b	b	b	a	a
AHMR_08C08	27.613	b	b	b	a	a	b	b	a	b	a	a	a	a	b	b	b	b	a	a	b	a	a	b	b	a	b	b	a	b	a	b	a	a	b	a	a	b	b	a	b	b	a	a	b	b	b	a	a
AHMR_07G12	27.613	b	b	b	a	a	b	b	a	b	a	a	a	a	b	b	b	b	a	a	b	a	a	b	b	a	b	b	a	b	a	b	a	a	b	a	a	b	b	a	b	b	a	a	b	b	b	a	a
BHMR_15J17	45.987	b	b	a	a	a	b	b	b	b	b	b	b	b	b	a	b	b	a	a	b	a	a	b	b	a	b	b	a	b	a	b	a	a	b	a	a	a	a	a	a	b	b	a	a	b	b	b	b
group C
ABMR_07M20	0	a	a	b	b	b	a	a	a	b	b	a	a	a	b	b	b	b	b	b	a	b	b	b	b	b	a	b	b	b	b	a	b	a	a	a	b	a	b	b	a	a	b	b	b	a	b	b	a
CABMR_07P09	0	a	a	b	b	b	a	a	a	b	b	a	a	a	b	b	b	b	b	b	a	b	b	b	b	b	a	b	b	b	b	a	b	a	a	a	b	a	b	b	a	a	b	b	b	a	b	b	a
ABMR_01P07	0	a	a	b	b	b	a	a	a	b	b	a	a	a	b	b	b	b	b	b	a	b	b	b	b	b	a	b	b	-	b	a	b	a	a	a	b	a	b	b	a	a	b	b	b	a	b	b	a
CABMR_01C24	0.654	a	a	b	b	b	a	a	a	b	b	a	a	a	b	b	a	b	b	b	a	b	b	b	b	b	a	b	b	b	b	a	b	a	a	a	b	a	b	b	a	a	b	b	b	a	b	b	a
BHMR_10E17	2.727	a	a	b	b	b	a	a	a	b	b	a	a	a	b	b	b	a	b	b	a	b	b	a	b	b	a	b	b	b	b	a	b	a	a	a	b	a	b	b	a	a	b	b	b	a	b	b	a
BHMR_10O13	2.727	a	a	b	b	b	a	a	a	b	b	a	a	a	b	b	b	a	b	b	a	b	b	a	b	b	a	b	b	b	b	a	b	a	a	a	b	a	b	b	a	a	b	b	b	a	b	b	a
BHMR_12J11	7.028	a	a	b	b	b	a	a	a	b	b	a	a	a	b	b	a	a	b	b	a	b	b	a	b	b	a	b	b	b	b	a	b	a	a	a	b	a	b	b	a	a	b	b	b	a	b	b	a
BBMR_16J19	8.574	a	a	b	b	b	a	b	a	b	b	a	a	a	b	b	a	a	b	b	a	b	b	a	b	b	a	b	b	b	b	a	b	a	a	a	b	b	b	b	a	a	b	b	b	a	b	b	a
CHMR_12F23	8.574	a	a	b	b	b	a	b	a	b	b	a	a	a	b	b	a	a	b	b	a	b	b	a	b	b	a	b	b	b	b	a	b	a	a	a	b	b	b	b	a	a	b	b	b	a	b	b	a
BHMR_12O14	8.574	a	a	b	b	b	a	b	a	b	b	a	a	a	b	b	a	a	b	b	a	b	b	a	b	b	a	b	b	b	b	a	b	a	a	a	b	b	b	b	a	a	b	b	b	a	b	b	a
BHMR_14B12	8.574	a	a	b	b	b	a	b	a	b	b	a	a	a	b	b	a	a	b	b	a	b	b	a	b	b	a	b	b	b	b	a	-	a	a	a	b	b	b	b	a	a	b	b	b	a	b	b	a
BBMR_09O18	10.718	a	a	b	b	b	a	b	a	b	b	a	a	a	b	b	a	a	b	b	a	b	b	a	b	b	a	b	b	b	b	a	b	a	a	a	b	b	b	b	a	a	b	b	b	a	b	b	a
BBMR_12J16	10.718	a	a	b	b	b	a	b	a	b	b	a	a	a	b	b	a	a	b	b	a	b	b	a	b	b	a	b	b	b	b	a	b	a	a	a	b	b	b	b	a	a	b	b	b	a	b	b	a
BHMR_12N07	10.718	a	a	b	b	b	a	b	a	b	b	a	a	a	b	b	a	a	b	b	a	b	b	a	b	b	a	b	b	b	b	a	b	a	a	a	b	b	b	b	a	a	b	b	b	a	b	b	a
BHMR_13F11	10.718	a	a	b	b	b	a	b	a	b	b	a	a	a	b	b	a	a	b	b	a	b	b	a	b	b	a	b	b	b	b	a	b	a	a	a	b	b	b	b	a	a	b	b	b	a	b	b	a
BHMR_14H19	10.718	a	a	b	b	b	a	b	a	b	b	a	a	a	b	b	a	a	b	b	a	b	b	a	b	b	a	b	b	b	b	a	b	a	a	a	b	b	b	b	a	a	b	b	b	a	b	b	a
BHMR_14J06	10.718	a	a	b	b	b	a	b	a	b	b	a	a	a	b	b	a	a	b	b	a	b	b	a	b	b	a	b	b	b	b	a	b	a	a	a	b	b	b	b	a	a	b	b	b	a	b	b	a
BHMR_16O09	10.718	a	a	b	b	b	a	b	a	b	b	a	a	a	b	b	a	a	b	b	a	b	b	a	b	b	a	b	b	b	b	a	b	a	a	a	b	b	b	b	a	a	b	b	b	a	b	b	a
BBMR_11P02	10.718	a	a	b	-	b	a	b	a	b	b	a	a	a	b	b	a	a	b	b	a	b	b	a	b	b	a	b	b	b	b	a	b	a	a	a	b	b	b	b	a	a	b	b	b	a	b	b	a
BBMR_12N17	10.718	a	a	b	b	b	a	b	a	b	b	a	a	a	b	b	a	a	b	b	a	b	b	a	b	b	a	b	b	b	b	a	b	a	a	a	b	b	b	b	a	a	b	b	b	a	b	b	a
BHMR_16O20	10.718	a	a	b	b	b	a	b	a	b	b	a	a	a	b	b	a	a	b	b	a	b	b	a	b	b	a	b	b	b	-	a	b	a	a	a	b	b	b	b	a	a	b	b	b	a	b	b	a
BHMR_14M03	10.718	a	a	b	b	b	a	b	a	b	b	a	a	a	b	b	a	a	b	b	a	b	b	a	b	b	a	b	b	b	b	a	b	-	a	a	b	b	b	b	a	a	b	b	b	-	b	b	a
BHMR_11K05	10.718	a	-	b	b	b	a	b	a	b	b	a	a	a	b	b	a	-	b	b	a	b	b	a	b	b	-	b	b	-	b	a	b	a	a	a	b	b	b	b	a	a	b	b	b	a	b	b	a
BHMR_15H21	10.718	a	a	b	b	-	a	b	a	b	b	a	a	a	b	b	a	a	b	b	a	b	b	a	b	b	a	-	-	-	b	a	b	a	a	a	b	b	b	b	a	a	b	b	-	a	b	b	a
BBMR_13B21	10.718	a	a	b	b	b	a	b	a	b	b	a	a	a	b	b	a	a	b	b	a	b	b	a	b	b	a	b	b	b	b	a	b	a	a	a	b	b	b	b	a	a	b	b	b	a	b	b	a
BBMR_10L09	10.718	a	a	b	b	b	a	b	a	b	b	a	a	a	b	b	a	a	b	b	a	b	b	a	b	b	a	b	b	b	b	a	b	a	a	a	b	b	b	b	a	a	b	b	b	a	b	b	a
BBMR_12P18	11.223	a	a	b	b	b	a	b	a	b	b	a	a	a	b	b	a	a	b	b	a	b	b	a	b	b	a	b	b	b	b	a	b	a	a	b	b	b	b	b	a	a	b	b	b	a	b	b	a
BBMR_15J22	11.223	a	a	b	b	b	a	b	a	b	b	a	a	a	b	b	a	a	b	b	a	b	b	a	-	b	a	b	b	b	b	a	b	a	a	b	b	b	b	b	a	a	b	b	b	a	b	b	a
BHMR_09N23	11.788	a	a	b	b	b	a	b	a	b	b	a	a	a	b	b	a	a	b	b	a	b	b	a	b	b	a	b	b	b	b	a	b	a	a	b	b	b	b	b	a	a	b	b	b	a	b	b	a
CAHMR_02D04	14.105	a	a	b	b	b	a	b	a	b	b	a	a	a	b	b	a	b	b	b	a	-	b	b	b	b	a	b	b	b	b	a	b	a	a	a	b	b	b	b	a	a	b	b	b	a	b	b	a
CABMR_01M07	14.476	a	a	b	b	b	a	b	a	b	b	a	a	a	b	b	a	b	b	b	a	b	b	b	b	b	a	b	b	b	b	a	b	a	a	a	b	b	b	b	a	a	b	b	b	a	b	b	a
CABMR_02F10	14.476	a	a	b	b	b	a	b	a	b	b	a	a	a	b	b	a	b	b	b	a	b	b	b	b	b	a	b	b	b	b	a	b	a	a	a	b	b	b	b	a	a	b	b	b	a	b	b	a
ABMR_04H05	14.476	a	a	b	b	b	a	b	a	b	b	a	a	a	b	b	a	b	b	b	a	b	b	b	b	b	a	b	b	b	b	a	b	a	a	a	b	b	b	b	a	a	b	b	b	a	b	b	a
CABMR_04P19	14.476	a	a	b	b	b	a	b	a	b	b	a	a	a	b	b	a	b	b	b	a	b	b	b	b	b	a	b	b	b	b	a	b	a	a	a	b	b	b	b	a	a	b	b	b	a	b	b	a
CABMR_06B15	14.476	a	a	b	b	b	a	b	a	b	b	a	a	a	b	b	a	b	b	b	a	b	b	b	b	b	a	b	b	b	b	a	b	a	a	a	b	b	b	b	a	a	b	b	b	a	b	b	a
group D
CBHMR_15L18	0	a	a	a	b	a	b	a	b	b	b	b	a	a	b	b	a	b	b	a	a	b	a	b	b	a	a	-	b	a	a	b	b	-	a	b	b	a	a	b	a	b	b	a	b	b	b	b	b
ABMR_04I08	4.357	a	a	a	b	a	b	a	b	b	b	b	a	a	a	b	a	b	b	a	a	b	a	b	b	a	a	b	b	a	a	b	b	a	a	b	b	a	a	b	a	b	b	a	b	b	b	b	b
ABMR_07J06	4.357	a	a	a	b	a	b	a	b	b	b	b	a	a	a	b	a	b	b	a	a	b	a	b	b	a	a	b	b	a	a	b	b	a	a	b	b	a	a	b	a	b	b	a	b	b	b	b	b
BBMR_11A20	8.499	a	a	a	b	a	a	a	b	b	b	b	a	a	a	b	a	b	b	a	a	b	a	b	b	a	a	b	b	a	b	b	b	a	a	b	b	a	a	b	a	b	a	b	b	a	b	b	b
group C
CBMR_13A17*	0	a	a	a	a	b	b	a	a	b	b	a	a	a	a	b	b	a	a	b	b	a	b	a	b	b	b	b	b	a	a	b	a	b	a	b	b	a	a	b	b	a	b	a	b	b	a	b	a
CHMR_13O19	1.735	a	a	a	-	b	b	a	a	b	b	-	a	a	a	b	a	a	-	b	b	a	b	a	b	b	b	b	a	a	a	b	a	b	a	b	b	a	a	b	b	a	b	a	b	b	a	b	a
BBMR_14P01**	2.41	a	a	a	a	b	b	a	a	b	b	a	a	a	a	b	a	a	a	b	b	a	b	a	b	b	b	b	a	a	a	b	a	b	a	b	b	a	a	b	b	a	b	a	b	b	a	b	a
CAHMR_07N06	7.131	a	a	a	a	b	b	a	a	b	b	a	a	a	a	b	a	b	a	b	b	a	b	b	b	b	b	b	a	a	a	b	a	b	a	a	b	a	a	b	b	a	b	a	b	b	a	b	a
CABMR_02D21	9.934	a	a	a	a	b	b	a	a	b	b	a	a	a	a	b	-	b	a	b	b	a	b	b	b	b	b	b	b	a	a	b	a	b	a	a	b	a	b	b	b	a	b	a	b	b	a	b	a
[truncated: 77 more columns]

## Sheet: DArT twin data
DArT twin data
Loci IPO323 x IPO95052	1101	1102		1103	1126		1105	1106		1109	1112		1115	1119		1132	1133		1142	1143		1154	1162		1177	1184		1196	1197		1426	1433		1429	1430		1434	1437		1435	1439		2034	2047		2035	2043		2037
CABMR_01A17	A	A		A	A		B	B		B	B		A	A		A	A		B	B		A	A		A	A		B	B		B	B		B	B		B	B		A	A		A	A		A	A		A
CABMR_01B03	B	B		A	A		B	B		A	A		B	B		A	A		B	B		B	B		B	B		B	B		A	A		B	B		A	A		B	B		B	B		B	B		A
ABMR_01B08	B	B		A	A		A	A		B	B		B	B		B	B		B	B		B	B		B	B		B	B		B	B		B	B		A	A		A	A		A	A		A	A		A
ABMR_01B24	B	B		B	B		A	A		A	A		A	A		A	A		B	B		A	A		A	A		A	A		A	A		A	A		A	A		A	A		A	A		A	A		B
ABMR_01C07	A	A		A	A		B	B		B	B		A	A		A	A		A	A		A	A		B	B		A	A		A	A		A	A		A	A		A	A		B	B		B	B		A
CABMR_01C12	B	B		B	B		B	B		B	B		A	A		B	B		A	A		A	A		A	A		B	B		A	A		A	A		A	A		B	B		A	A		B	B		B
ABMR_01C21	B	B		A	A		A	A		B	B		A	A		B	B		A	A		A	A		B	B		A	A		A	A		A	A		A	A		A	A		A	A		A	A		A
CABMR_01C24	B	B		A	A		A	A		B	B		B	B		B	B		B	B		A	A		A	A		A	A		B	B		A	A		B	A		B	B		A	A		B	B		B
CABMR_01E01	B	B		B	B		A	A		A	A		A	A		B	B		A	A		B	B		A	A		A	A		B	B		A	A		A	A		A	A		A	A		B	B		A
CABMR_01E02****	A	-		B	B		A	A		B	B		A	A		B	B		B	B		B	B		B	B		A	A		A	A		B	B		B	B		B	B		B	B		B	B		B
CABMR_01E03	A	A		B	B		B	B		A	A		B	B		B	B		B	B		B	B		A	A		A	A		A	A		A	A		A	A		A	A		B	B		B	B		A
ABMR_01F05	B	B		B	B		B	B		A	A		A	A		-	B		A	A		B	B		A	A		A	A		B	B		A	A		-	A		A	A		A	A		B	B		A
ABMR_01F24	A	A		A	A		A	A		A	A		B	B		B	B		B	B		A	A		A	A		B	B		B	B		A	A		A	A		A	A		A	A		A	A		A
ABMR_01G02	A	A		A	A		B	B		B	B		A	A		A	A		A	A		A	A		B	B		A	A		A	A		A	A		A	A		A	A		B	B		B	B		A
ABMR_01H12	B	B		A	A		A	A		A	A		A	A		B	B		-	A		A	A		A	A		B	B		A	A		B	B		A	A		B	B		A	-		A	A		A
ABMR_01I07	A	A		A	A		A	A		-	A		A	A		A	A		B	B		B	B		A	A		A	A		A	A		B	B		-	A		-	A		B	-		B	B		B
ABMR_01I09	A	A		B	B		A	A		A	A		A	A		A	A		B	B		A	A		-	B		A	A		A	A		A	A		A	A		A	A		A	A		B	B		A
ABMR_01I19	B	B		A	A		A	A		A	A		A	A		B	B		A	A		A	A		B	B		A	A		A	A		A	A		A	A		A	A		B	-		A	A		A
ABMR_01J15	B	B		A	A		B	B		B	B		A	A		A	A		A	A		A	A		B	B		B	B		B	B		A	A		B	B		B	B		A	-		A	A		A
ABMR_01J17	B	B		A	A		B	B		A	A		A	A		A	A		B	B		B	B		B	B		B	B		A	A		-	B		A	A		B	B		B	-		A	A		B
CABMR_01K07	A	A		B	B		A	A		B	B		A	A		A	A		A	A		B	B		B	B		A	A		A	A		B	B		A	A		A	A		B	B		B	B		B
ABMR_01K10*	A	A		B	B		A	A		A	A		A	A		B	B		B	B		A	A		B	B		B	B		A	A		B	B		B	B		B	B		A	A		B	B		B
ABMR_01K14	A	A		A	A		A	A		A	A		A	A		A	A		A	A		B	B		A	A		A	A		B	B		A	A		A	A		A	A		A	A		B	B		A
CABMR_01K22	B	B		A	A		A	A		B	B		B	B		B	B		B	B		B	B		B	B		B	B		B	B		B	B		A	A		A	A		A	A		A	A		A
ABMR_01L03	B	B		A	A		B	B		A	A		B	B		A	A		B	B		B	B		B	B		B	B		A	A		A	A		A	A		B	B		B	B		A	A		A
CABMR_01L15	A	A		B	B		B	B		A	A		B	B		B	B		B	B		A	A		A	A		A	A		B	B		A	A		A	A		B	B		A	A		A	A		B
ABMR_01M01	A	-		A	A		A	A		B	B		A	A		A	A		B	B		B	B		B	B		B	B		-	B		A	A		A	A		B	B		B	-		B	B		A
CABMR_01M07	B	B		A	A		A	A		B	B		B	B		B	B		B	B		A	A		A	A		A	A		A	A		A	A		B	B		B	B		A	A		B	B		B
ABMR_01M15	B	B		A	A		A	A		A	A		A	A		A	A		A	A		A	A		B	B		A	A		B	B		A	A		A	A		A	A		A	A		A	A		A
CABMR_01N02	B	B		A	A		A	A		B	B		A	A		B	B		A	A		A	A		B	B		A	A		A	A		A	A		A	A		A	A		A	A		A	A		A
ABMR_01O03	B	B		B	B		B	B		B	B		A	A		B	B		B	B		B	B		A	A		B	-		A	A		A	A		A	A		B	B		A	A		A	A		B
ABMR_01O07**	A	A		B	B		A	A		A	A		A	A		B	B		B	B		A	A		B	B		B	B		X	A		B	B		-	-		B	B		-	-		B	B		B
CABMR_01O17	B	B		A	A		A	A		B	B		A	A		B	B		A	A		A	A		B	B		A	A		A	A		A	A		A	A		A	A		A	A		A	A		A
CABMR_01O19	A	A		A	A		A	A		A	A		B	B		B	B		B	B		A	A		B	B		B	B		B	B		A	A		A	A		B	A		A	A		A	A		B
CABMR_01O20	A	A		B	B		B	B		A	A		B	B		B	B		B	B		B	B		A	A		A	A		A	A		A	A		A	A		A	A		B	B		B	B		A
ABMR_01P07	B	B		A	A		A	A		B	B		B	B		B	B		B	B		A	A		A	A		A	A		B	B		A	A		-	-		B	B		A	-		B	B		-
ABMR_01P10	A	A		A	A		A	A		B	B		B	B		B	B		B	B		B	B		A	A		B	B		A	A		B	B		A	A		A	A		A	A		A	A		-
CABMR_02A02	A	A		A	A		B	B		B	B		A	A		A	A		B	B		A	A		A	A		B	B		B	B		A	A		B	B		A	A		B	B		A	A		A
ABMR_02A04	B	B		A	A		B	B		A	A		B	B		A	A		B	B		B	B		B	B		B	B		A	A		B	B		A	A		B	B		B	B		B	B		-
CABMR_02D17	B	B		B	B		A	A		B	B		A	A		B	B		B	B		B	B		B	B		-	B		B	B		A	A		B	B		B	B		B	-		B	B		A
CABMR_02D21	A	A		B	B		A	A		B	B		A	A		A	A		B	B		B	B		B	B		A	A		B	B		A	A		B	-		A	A		A	A		B	B		B
ABMR_02E22*	A	A		B	B		A	A		A	A		A	A		B	B		B	B		A	A		B	B		B	B		A	A		B	B		B	B		B	B		A	A		B	B		B
CABMR_02F10	B	B		A	A		A	A		B	B		B	B		B	B		B	B		A	A		A	A		A	A		A	A		A	A		B	B		B	B		A	A		B	B		B
ABMR_02F13	A	A		A	A		A	A		A	A		B	B		B	B		B	B		A	A		A	A		B	B		B	B		A	A		A	A		A	A		A	A		A	A		A
CABMR_02F15	B	B		A	A		B	B		B	B		B	B		A	A		B	B		A	A		A	A		B	B		B	B		A	A		B	B		A	A		B	B		A	A		A
ABMR_02I18	A	A		B	B		A	A		A	A		A	A		A	A		B	B		B	B		B	B		A	A		A	A		A	A		B	B		A	A		B	B		B	B		B
CABMR_02J08	B	B		A	A		B	B		A	A		B	B		A	A		B	B		B	B		B	B		B	B		A	A		B	B		A	A		B	B		B	-		B	B		A
ABMR_02L14	B	B		B	B		B	B		B	B		A	A		B	B		B	B		B	B		A	A		B	B		A	A		A	A		A	A		B	B		A	A		A	A		B
ABMR_02L22	A	A		A	A		A	A		B	B		A	A		B	B		A	A		A	A		A	A		A	A		A	A		B	X		B	-		B	B		-	A		B	B		B
ABMR_02M22	B	B		B	B		B	B		A	A		A	A		A	A		B	B		A	A		A	A		A	A		A	A		B	B		A	A		B	B		A	A		A	A		A
ABMR_02N17	B	B		A	A		A	A		B	B		B	B		A	A		B	B		A	A		A	A		B	B		B	B		A	A		B	B		A	A		B	B		A	A		A
ABMR_02O21	A	A		B	B		B	B		A	A		B	B		B	B		B	B		B	B		A	A		A	A		A	A		A	A		-	-		A	A		B	B		B	B		A
CABMR_02P02	B	B		A	A		A	A		B	B		B	B		B	B		B	B		B	B		B	B		B	B		B	B		A	A		A	A		A	A		B	B		B	B		A
ABMR_02P03	B	B		A	A		A	A		B	B		B	B		B	B		B	B		B	B		B	B		B	B		A	A		B	B		A	A		A	A		A	A		A	A		A
ABMR_02P08	A	A		A	A		A	A		B	B		A	A		B	B		A	A		A	A		A	A		A	A		A	A		B	B		B	B		B	B		A	A		B	B		B
ABMR_02P16	A	A		B	B		A	A		B	B		B	B		A	A		A	A		B	B		A	A		B	B		B	B		B	B		A	A		B	B		A	A		B	B		A
ABMR_02P18	B	B		B	B		B	B		A	A		A	A		B	B		A	A		B	B		A	A		A	A		B	B		A	A		A	A		A	A		A	A		B	B		A
CABMR_03A14**	A	A		A	A		B	B		A	A		B	B		B	B		B	B		B	B		B	B		B	B		A	A		A	A		B	B		A	A		A	A		A	A		B
ABMR_03A22	B	B		A	A		A	A		B	B		A	A		A	A		A	A		B	B		A	A		A	A		B	B		A	A		A	A		A	A		A	A		B	B		A
CABMR_03B13	A	A		B	B		B	B		A	A		B	B		B	B		A	A		A	A		A	A		B	B		B	B		A	A		A	A		A	A		B	B		B	B		A
CABMR_03C01	A	A		A	A		B	B		B	B		A	A		A	A		B	B		A	A		A	A		B	B		B	B		A	A		B	B		A	A		A	A		A	A		A
CABMR_03C15	A	A		A	A		B	B		B	B		A	A		A	A		B	B		A	A		A	A		B	B		B	B		B	B		B	B		A	A		A	A		A	A		A
CABMR_03C23	B	B		A	A		B	B		A	A		B	B		A	A		B	B		B	B		B	B		B	B		A	A		B	B		-	-		B	B		B	B		B	B		A
CABMR_03E17	A	A		B	B		B	B		A	A		A	A		A	A		A	A		B	B		A	A		A	A		B	B		B	B		A	A		A	A		A	A		B	B		B
CABMR_03F07	B	B		A	A		B	B		A	A		B	B		A	A		B	B		B	B		B	B		B	A		A	A		A	A		A	A		B	B		B	B		B	B		A
ABMR_03G03	A	A		A	A		A	A		B	B		A	A		A	A		B	B		B	B		B	B		B	B		B	B		A	A		A	A		B	B		B	B		B	B		A
ABMR_03G17	B	B		A	A		A	A		B	B		A	A		B	B		A	A		A	A		B	B		A	A		A	A		A	A		A	A		A	A		A	A		A	A		A
ABMR_03G20	A	A		B	B		B	B		A	A		B	B		B	B		B	B		B	B		A	A		A	A		A	A		A	A		A	A		A	A		B	B		B	B		A
ABMR_03H02	B	B		B	B		A	A		A	A		A	A		B	B		A	A		B	B		A	A		A	A		B	B		A	A		A	A		A	A		A	A		B	B		A
CABMR_03H14	A	A		B	B		B	B		A	A		B	B		B	B		B	B		A	A		A	A		A	A		B	B		A	A		A	A		B	B		A	A		B	B		B
CABMR_03I08	A	A		B	B		B	B		A	A		A	A		B	B		B	B		B	B		B	B		B	B		B	B		B	B		B	B		A	A		B	-		B	B		A
CABMR_03I13	A	A		B	B		A	A		A	A		B	B		B	B		B	B		B	B		A	A		A	A		A	A		A	A		A	A		A	A		B	B		B	B		A
ABMR_03J10	B	B		B	B		A	A		A	A		A	A		B	B		A	A		B	B		A	A		A	A		B	B		A	A		A	A		A	A		A	A		B	B		A
CABMR_03J15	A	A		A	A		A	A		B	B		B	B		B	B		B	B		B	B		A	A		B	B		A	A		B	B		A	A		A	A		A	A		A	A		B
CABMR_03J20	A	A		B	B		A	A		A	A		B	B		B	B		B	B		B	B		A	A		A	A		A	A		A	A		A	A		A	A		B	B		B	B		A
ABMR_03K03	A	A		A	A		A	A		A	A		B	B		B	B		B	B		A	A		A	A		B	B		B	B		A	A		A	A		A	A		A	A		A	A		A
ABMR_03L07	B	B		A	A		B	B		B	B		B	B		B	B		B	B		B	B		A	A		B	B		B	B		B	B		B	B		B	B		B	B		A	A		B
ABMR_03L24	A	A		B	B		B	B		A	A		B	B		B	B		B	B		A	A		A	A		A	A		B	B		A	A		A	A		B	B		A	-		A	A		B
CABMR_03M18	A	A		A	A		B	B		B	B		B	B		A	A		A	A		A	A		B	B		A	A		A	A		A	A		A	A		A	A		B	B		B	B		A
ABMR_03N05	B	B		A	A		A	A		B	B		B	B		B	B		B	B		B	B		B	B		B	B		A	A		B	B		B	B		A	A		B	B		A	A		A
CABMR_03O06*	A	A		A	A		B	B		A	A		B	B		B	B		B	B		B	B		B	B		B	B		A	A		A	A		B	B		A	A		A	A		A	A		B
ABMR_03O07	B	B		A	A		A	A		A	A		A	A		B	B		A	A		A	A		B	B		A	A		A	A		A	A		A	A		A	A		B	B		A	A		A
ABMR_03O10	B	B		B	B		B	B		B	B		A	A		B	B		B	B		B	B		A	A		B	B		A	A		A	A		A	A		B	B		A	A		A	A		B
ABMR_03P05	A	A		B	B		B	B		A	A		A	A		B	B		B	B		B	B		B	B		B	B		B	B		B	B		B	B		A	A		B	-		B	B		A
CABMR_03P12	A	A		A	A		B	B		A	A		A	A		B	B		B	B		B	B		A	A		B	B		A	A		B	B		-	B		A	A		B	-		A	A		B
ABMR_03P16	B	B		A	A		A	A		B	B		B	B		B	B		B	B		B	B		B	B		B	B		B	B		A	A		A	A		A	A		B	B		B	B		A
ABMR_03P20	B	B		B	B		B	B		B	B		A	A		B	B		B	B		B	B		A	A		B	B		A	A		A	A		A	A		B	B		A	A		A	A		B
ABMR_03P21	A	A		A	A		A	A		B	B		A	A		A	A		B	B		A	A		A	A		B	B		B	B		A	A		B	B		A	A		A	A		A	A		A
ABMR_04B04	A	A		A	A		B	B		B	B		B	B		A	A		-	A		A	A		B	B		A	A		A	A		B	B		A	A		A	A		B	B		B	B		A
ABMR_04B09**	A	A		A	A		A	A		A	A		X	B		B	B		B	B		A	A		A	A		B	B		X	B		A	A		-	-		A	A		A	-		A	A		A
ABMR_04C16	B	B		B	B		A	A		B	B		A	A		B	B		B	B		B	B		B	B		B	B		B	B		A	A		B	B		A	A		B	B		B	B		A
CABMR_04D15	A	A		B	B		B	B		A	A		A	A		A	A		A	A		A	A		A	A		A	A		B	B		B	B		A	A		A	A		A	A		B	B		B
CABMR_04E23	A	A		A	A		B	B		B	B		B	B		B	B		B	B		B	B		B	B		B	B		A	A		B	B		B	B		A	A		A	A		B	B		B
ABMR_04F08	B	B		A	A		A	A		B	B		B	B		B	B		B	B		B	B		B	B		B	B		A	A		B	B		B	B		A	A		B	B		A	A		A
CABMR_04F22*	B	B		B	B		B	B		A	A		B	B		A	A		B	B		A	A		A	A		A	A		B	B		B	B		-	A		A	A		A	-		A	A		A
ABMR_04G07***	B	B		B	B		A	A		A	A		A	A		B	B		B	B		B	B		B	B		A	A		A	A		B	B		B	B		B	B		B	B		B	B		B
ABMR_04G08	B	B		A	A		A	A		B	B		B	B		A	A		B	B		A	A		A	A		B	B		B	B		A	A		B	B		A	A		B	B		A	A		A
ABMR_04G24	B	B		B	B		A	A		A	A		A	A		A	A		B	B		A	A		A	A		A	A		A	A		A	A		-	A		A	A		A	A		A	A		B
ABMR_04H01	A	A		B	B		A	A		A	A		A	A		B	B		B	B		B	B		B	B		B	B		B	B		B	B		-	B		A	A		B	B		B	B		A
ABMR_04H05	B	B		A	A		A	A		B	B		B	B		B	B		B	B		A	A		A	A		A	A		A	A		A	A		B	B		B	B		A	A		B	B		B
ABMR_04I08	A	A		B	B		B	B		B	B		A	A		A	A		A	A		B	B		B	B		B	B		B	B		A	A		A	A		B	B		A	A		A	A		A
ABMR_04I16	B	B		B	B		B	B		B	B		A	A		B	B		-	B		B	B		A	A		B	B		A	A		A	A		A	A		B	B		A	-		A	A		B
CABMR_04I19	B	B		A	A		B	B		A	A		B	B		A	A		B	B		B	B		B	B		B	B		A	A		B	B		A	A		B	B		B	B		B	B		A
ABMR_04J03	A	A		B	B		B	B		A	A		B	B		B	B		B	B		B	B		A	A		A	A		A	A		A	A		-	A		A	A		B	B		B	B		A
CABMR_04J06	A	A		A	A		B	B		B	B		B	B		A	A		A	A		A	A		B	B		A	A		A	A		A	A		A	A		A	A		B	B		B	B		A
ABMR_04K05	B	B		A	A		A	A		B	B		A	A		A	A		A	A		B	B		A	A		A	A		B	B		A	A		-	-		A	A		-	A		B	B		A
CABMR_04K10	B	B		B	B		A	A		A	A		A	A		A	A		A	A		A	A		B	B		A	A		A	A		A	A		A	A		A	A		A	A		A	A		A
CABMR_04K19***	A	A		B	B		A	A		B	B		A	A		B	B		B	B		B	B		B	B		A	A		A	A		B	B		B	B		B	B		B	B		B	B		B
ABMR_04L03	B	B		B	B		A	A		B	B		B	B		B	B		B	B		A	A		B	B		A	A		B	B		A	A		B	B		B	B		B	-		A	A		B
ABMR_04L05	B	B		A	A		B	B		B	B		A	A		A	A		A	A		A	A		B	B		B	B		B	B		A	A		B	B		B	B		A	A		B	B		A
ABMR_04L16	B	B		B	B		A	A		B	B		B	B		B	B		-	B		A	A		B	B		A	A		B	B		A	A		B	B		B	B		B	B		A	A		B
ABMR_04L19	B	B		B	B		B	B		B	B		A	A		B	B		B	B		B	B		A	A		B	B		A	A		A	A		A	A		B	B		A	A		A	A		B
CABMR_04N23	B	B		B	B		B	B		B	B		A	A		B	B		A	A		A	A		A	A		B	B		A	A		A	A		A	A		B	B		A	A		B	B		B
ABMR_04O09	A	A		A	A		A	A		A	A		A	A		A	A		B	B		B	B		A	A		A	A		A	A		B	B		A	A		A	A		B	B		B	B		B
CABMR_04O10	B	B		A	A		B	B		B	B		B	B		A	A		B	B		A	A		B	B		B	B		B	B		A	A		B	B		A	A		B	B		B	B		B
CABMR_04O18	A	A		A	A		A	A		A	A		A	A		A	A		A	A		B	B		A	A		A	A		B	B		A	A		A	A		A	A		A	A		B	B		A
CABMR_04O23	A	A		A	A		A	A		B	B		B	B		B	B		B	B		B	B		A	A		B	B		A	A		B	B		B	B		A	A		A	A		A	-		A
CABMR_04P01	B	B		B	B		A	A		A	A		A	A		A	A		B	B		B	B		B	B		B	B		A	A		A	A		B	B		A	A		B	B		B	B		B
ABMR_04P14	A	A		B	B		A	A		B	B		B	B		B	B		B	B		B	X		B	B		B	B		A	A		B	B		A	B		A	A		B	B		A	A		A
CABMR_04P19	B	B		A	A		A	A		B	B		B	B		B	B		B	B		A	A		A	A		A	A		A	A		A	A		B	-		B	B		A	A		B	B		B
CABMR_04P23	A	A		A	A		B	B		A	A		B	B		B	B		B	B		B	B		A	A		B	B		A	A		A	A		B	B		A	A		B	B		A	A		B
ABMR_05A04	B	B		A	A		A	A		B	B		B	B		B	B		B	B		B	B		B	B		B	B		A	A		B	B		A	A		A	A		A	A		A	A		A
ABMR_05A09**	B	B		A	A		A	A		A	A		A	A		A	A		B	B		B	B		B	B		B	B		A	A		A	A		B	B		A	A		B	B		B	B		B
ABMR_05B15	A	A		B	B		A	A		A	A		A	A		B	B		B	B		A	A		B	B		B	B		A	A		B	B		-	B		B	B		A	A		B	B		B
CABMR_05B21	A	A		A	A		A	A		B	B		A	A		A	A		A	A		B	B		A	A		A	A		B	B		B	B		A	A		B	B		A	A		A	A		B
ABMR_05D21	A	A		B	B		B	B		B	B		A	A		B	B		B	B		B	B		B	B		A	A		B	B		A	A		B	B		A	A		B	B		A	A		B
ABMR_05D23	A	A		B	B		A	A		B	B		B	B		A	A		A	-		B	B		A	A		B	B		B	B		B	B		A	A		B	B		A	A		B	B		A
ABMR_05F11	A	A		A	A		A	A		A	A		A	A		A	A		B	B		B	B		A	A		A	A		A	A		B	B		A	A		A	A		B	-		B	B		B
CABMR_05H23	B	B		A	A		A	A		B	B		B	B		B	B		B	B		B	B		B	B		B	B		A	A		B	B		-	A		A	A		B	B		A	A		A
ABMR_05J12	B	B		A	A		A	A		B	B		A	A		B	B		B	B		B	B		A	A		A	A		B	B		A	A		B	B		-	B		A	A		A	A		B
ABMR_05K01	A	A		A	A		A	A		A	A		A	A		A	A		B	B		B	B		A	A		A	A		A	A		B	B		A	A		A	A		B	B		B	B		B
CABMR_05L23	A	A		B	B		B	B		A	A		B	B		B	B		B	B		A	A		A	A		A	A		B	B		A	A		A	A		B	B		A	A		A	A		B
ABMR_05N11	B	B		A	A		A	A		B	B		A	A		B	B		B	B		B	B		A	A		A	A		B	B		A	A		-	-		B	B		A	A		A	A		B
ABMR_05N20	B	B		A	A		B	B		A	A		A	A		B	B		A	A		B	B		A	A		A	A		B	B		A	A		B	B		A	A		A	A		B	B		A
CABMR_05O14	X	B		A	A		B	B		B	B		A	A		A	A		X	X		A	A		B	B		B	B		B	B		A	A		B	B		B	B		A	A		A	A		A
CABMR_06A13	B	B		A	A		B	B		A	A		A	A		B	B		A	A		B	B		A	A		A	A		B	B		A	A		-	B		A	A		A	A		B	B		A
ABMR_06B05	A	A		B	B		B	B		A	A		B	B		B	B		B	B		A	A		A	A		A	A		B	B		A	A		A	A		B	B		A	A		A	A		B
CABMR_06B15	B	B		A	A		A	A		B	B		B	B		B	B		B	B		A	A		A	A		A	A		A	A		A	A		B	B		B	B		A	A		B	B		B
ABMR_06C15	B	B		B	B		A	A		A	A		A	A		B	B		A	A		B	B		A	A		A	A		B	B		A	A		A	A		A	A		A	A		B	B		A
ABMR_06D16	A	A		A	A		A	A		B	B		A	A		B	B		A	A		A	A		A	A		A	A		A	A		B	B		B	B		B	B		A	A		B	B		B
CABMR_06D24*	A	A		A	A		A	A		B	B		B	B		B	B		B	B		B	B		B	B		B	B		A	A		B	B		B	B		A	A		A	A		A	A		B
ABMR_06E03	B	B		B	B		A	A		B	B		B	B		A	A		A	A		B	B		B	B		B	B		A	A		B	B		A	A		B	B		A	A		B	B		A
ABMR_06E16	B	B		B	B		B	B		B	B		A	A		B	B		B	B		B	B		A	A		B	B		X	A		A	A		A	A		B	B		A	A		A	A		B
ABMR_06E19	B	B		A	A		A	A		B	B		A	A		B	B		B	B		B	B		A	A		A	A		A	A		A	A		B	B		B	B		A	-		A	A		A
CABMR_06F19	A	A		B	B		A	A		A	A		B	B		A	A		A	A		B	B		A	A		B	B		B	B		B	B		A	A		B	B		A	A		B	B		A
ABMR_06G17	A	A		A	A		A	A		A	A		A	A		A	A		A	A		B	B		A	A		A	A		B	B		A	A		A	A		A	A		A	A		B	B		A
ABMR_06H10	A	A		B	B		A	A		B	B		B	B		A	A		A	A		B	B		A	A		B	B		B	B		B	B		A	A		B	B		A	A		B	B		A
ABMR_06I16**	B	B		B	B		B	B		A	A		A	A		B	B		B	B		B	B		B	B		B	B		A	A		B	B		A	A		B	B		A	A		A	A		B
CABMR_06I18*	B	B		B	B		B	B		B	B		B	B		B	B		B	B		A	A		B	B		B	B		A	A		A	A		B	B		A	B		B	B		B	B		B
CABMR_06I23	B	B		B	B		A	A		B	B		B	B		B	B		B	B		A	A		A	A		A	A		B	B		A	A		B	B		A	A		B	B		A	A		B
CABMR_06J10	A	A		A	A		A	A		B	B		B	B		B	B		B	B		B	B		A	A		B	B		A	A		B	B		B	B		A	A		A	A		A	A		A
CABMR_06K02	A	A		A	A		A	A		B	B		B	B		B	B		B	B		A	A		A	A		B	B		B	B		A	A		A	A		A	A		A	A		A	A		A
ABMR_06K19	A	A		B	B		A	A		B	B		B	B		A	A		A	A		B	B		A	A		B	B		B	B		B	B		A	A		B	B		A	A		A	A		A
ABMR_06L03	B	B		A	A		A	A		B	B		A	A		B	B		A	A		A	A		B	B		A	A		A	A		A	A		A	A		A	A		A	A		A	A		A
CABMR_06L08	B	B		A	A		A	A		B	B		A	A		A	A		A	A		B	B		A	A		A	A		B	B		A	A		A	A		A	A		A	A		B	B		A
CABMR_06L09	A	A		A	A		A	A		A	A		A	A		A	A		A	A		A	A		B	B		A	A		B	B		A	A		A	A		A	A		A	A		B	B		A
CABMR_06L14	B	B		A	A		B	B		A	A		B	B		A	A		B	B		B	B		B	B		B	B		A	A		A	A		A	A		B	B		B	B		A	A		A
ABMR_06L18	B	B		A	A		A	A		A	A		A	A		A	A		A	A		A	A		B	B		A	A		B	B		A	A		A	A		A	A		A	A		B	B		A
CABMR_06M10	A	A		B	B		A	A		B	B		A	A		A	A		A	A		B	B		B	B		A	A		A	A		A	A		A	A		A	A		B	B		B	B		B
ABMR_06M18	B	B		B	B		A	A		B	B		A	A		B	B		B	B		B	B		B	B		A	A		B	B		A	A		B	B		B	B		B	B		A	A		A
ABMR_06N06	B	B		A	A		A	A		A	A		A	A		B	B		A	A		A	A		B	B		A	A		A	A		A	A		A	A		A	A		B	B		A	A		A
ABMR_06N08	A	A		A	A		B	B		B	B		B	B		B	B		B	B		B	B		B	B		B	B		A	A		B	B		B	B		A	A		A	A		A	A		B
CABMR_06N13	A	A		A	A		A	A		A	A		A	A		A	A		A	A		B	B		A	A		A	A		B	B		A	A		A	A		A	A		A	A		B	B		A
ABMR_06N16	A	A		B	B		A	A		B	B		B	B		A	A		A	A		B	B		A	A		B	B		B	B		B	B		A	A		B	B		A	A		B	B		A
ABMR_06N18	B	B		A	A		A	A		B	B		B	B		B	B		B	B		B	B		B	B		B	B		A	A		B	B		B	B		A	A		B	B		A	A		A
ABMR_06N24	B	B		B	B		A	A		A	A		B	B		A	A		A	A		B	B		B	B		A	A		A	A		B	B		A	A		B	B		A	A		B	B		A
ABMR_06O04	B	B		A	A		A	A		B	B		A	A		B	B		A	A		A	A		B	B		A	A		A	A		A	A		A	A		A	A		A	A		A	A		A
ABMR_06O19	B	B		A	A		B	B		A	A		A	A		B	B		A	A		B	B		A	A		A	A		B	B		A	A		B	B		A	A		A	A		B	B		A
ABMR_06P06*	B	B		B	B		B	B		A	A		A	A		B	B		B	B		B	B		B	B		B	B		A	A		B	B		B	B		B	B		-	-		A	A		A
CABMR_06P08	A	A		B	B		A	A		A	A		B	B		B	B		B	B		B	B		A	A		A	A		A	A		A	A		A	A		A	A		B	B		B	B		A
CABMR_06P15**	A	A		B	B		A	A		A	A		A	A		B	B		B	B		A	A		B	B		B	B		A	A		B	B		B	B		B	B		A	A		B	B		B
ABMR_07A02**	B	B		A	A		A	A		A	A		A	A		A	A		B	B		B	B		-	B		B	B		A	A		A	A		B	B		A	A		B	B		B	B		B
ABMR_07A04	A	A		A	A		B	B		B	B		B	B		A	A		A	A		A	A		B	B		A	A		A	A		A	A		A	A		A	A		B	B		B	B		A
CABMR_07A05	B	B		A	A		B	B		B	B		A	A		A	A		A	A		A	A		B	B		B	B		B	B		A	A		B	B		B	B		A	A		-	A		A
ABMR_07B12	B	B		A	A		B	B		A	A		A	A		B	B		A	A		B	B		A	A		A	A		B	B		A	A		B	-		A	A		A	A		B	B		A
ABMR_07C04	A	A		A	A		B	B		A	A		B	B		A	A		A	A		A	A		B	B		A	A		A	A		A	A		A	A		B	B		A	A		A	A		A
ABMR_07C11	A	A		A	A		A	A		B	B		B	B		B	B		B	B		B	B		A	A		B	B		A	A		B	B		A	A		A	A		A	A		A	A		B
ABMR_07C16	B	B		A	A		B	B		A	A		A	A		B	B		A	A		A	A		A	A		A	A		B	B		A	A		B	B		B	B		A	A		B	B		B
ABMR_07C17	A	A		B	B		A	A		B	B		B	B		A	A		A	A		B	B		A	A		B	B		B	B		B	B		A	A		B	B		A	A		A	A		A
CABMR_07D02	B	B		A	A		A	A		B	B		B	B		B	B		B	B		B	B		B	B		B	B		B	B		A	A		A	A		A	A		B	B		B	B		A
CABMR_07D04	A	A		A	A		B	B		B	B		A	A		B	B		B	B		A	A		A	A		B	B		A	A		A	A		B	B		B	B		A	A		B	B		B
CABMR_07D07	B	B		A	A		B	B		A	A		A	A		A	A		B	B		B	B		B	B		B	B		A	A		B	B		A	A		B	B		B	B		A	A		B
ABMR_07D12	B	B		B	B		A	A		A	A		A	A		B	B		A	A		B	B		A	A		A	A		B	B		A	A		A	A		-	A		A	A		B	B		A
ABMR_07E02	B	B		A	A		B	B		A	A		B	B		A	A		B	B		B	B		B	B		B	B		A	A		B	B		A	A		B	B		B	B		B	B		A
ABMR_07E04	A	A		B	B		B	B		A	A		A	A		A	A		A	A		A	A		A	A		A	A		B	B		B	B		A	A		A	A		A	A		B	B		B
ABMR_07E05	B	B		A	A		A	A		B	B		B	B		B	B		B	B		B	B		B	B		B	B		A	A		B	B		A	B		A	A		B	B		A	A		A
ABMR_07E12	A	A		B	B		A	A		A	A		A	A		A	A		B	B		A	A		B	B		A	A		A	A		A	A		A	A		A	A		A	-		B	B		A
CABMR_07E18	B	B		A	A		B	B		A	A		B	B		A	A		B	B		B	B		A	A		A	A		B	B		A	A		A	A		B	B		B	B		A	A		B
CABMR_07E19*	A	A		B	B		A	A		A	A		A	A		B	B		B	B		A	A		B	B		B	B		A	A		B	B		-	B		B	B		A	A		B	B		B
ABMR_07E24	B	B		B	B		B	B		A	A		A	A		B	B		A	A		B	B		A	A		A	A		B	B		A	A		A	A		A	A		A	A		B	B		A
ABMR_07F18	B	B		A	A		A	A		B	B		A	A		B	B		A	A		A	A		B	B		A	A		A	A		A	A		A	A		A	A		A	A		A	A		A
ABMR_07G01	B	B		B	B		A	A		A	A		B	B		A	A		A	A		B	B		B	B		A	A		A	A		B	B		A	A		B	B		A	A		B	B		A
ABMR_07G03	B	B		A	A		A	A		B	B		B	B		B	B		B	B		B	B		B	B		B	B		A	A		B	B		B	B		B	A		B	B		A	A		A
ABMR_07G04	B	B		B	B		A	A		A	A		A	A		A	A		A	A		A	A		B	B		A	A		A	A		A	A		A	A		A	A		A	A		A	A		A
ABMR_07G15	B	B		B	B		A	A		A	A		A	A		A	A		B	B		A	A		A	A		A	A		A	A		A	A		A	A		A	A		A	A		A	A		B
CABMR_07H02	A	A		B	B		A	A		B	B		B	B		A	A		A	A		B	B		A	A		B	B		B	B		B	B		A	A		B	B		A	A		B	B		A
CABMR_07H13	A	A		A	A		B	B		A	A		B	B		B	B		B	B		B	B		A	A		B	B		A	A		A	A		B	B		A	A		B	B		A	A		B
ABMR_07I11	B	B		B	B		B	B		B	B		A	A		B	B		B	B		B	B		A	A		B	B		A	A		A	A		A	A		B	B		A	A		A	A		B
ABMR_07I20	B	B		B	B		A	A		A	A		A	A		A	A		B	B		B	B		B	B		B	B		A	A		A	A		B	B		A	A		B	-		B	B		B
CABMR_07I21	B	B		B	B		A	A		B	B		B	B		B	B		B	B		A	A		B	B		A	A		B	B		A	A		B	B		B	B		B	B		A	A		B
CABMR_07I24	B	B		A	A		B	B		A	A		B	B		A	A		B	B		B	B		B	B		B	B		A	A		A	A		A	A		B	B		B	-		A	A		A
ABMR_07J06	A	A		B	B		B	B		B	B		A	A		A	A		A	A		B	B		B	B		B	B		B	B		A	A		A	A		B	B		A	A		A	A		A
ABMR_07J21	A	A		A	A		A	A		B	B		A	A		A	A		B	B		A	A		A	A		B	B		B	B		A	A		B	B		A	A		A	A		A	A		A
CABMR_07K05	B	B		A	A		B	B		A	A		A	A		B	B		A	A		B	B		A	A		A	A		B	B		A	A		B	B		A	A		A	A		B	B		A
ABMR_07K19**	B	B		A	A		B	B		B	B		B	B		B	B		B	B		B	B		B	B		B	B		A	A		B	B		A	A		B	B		B	B		B	B		A
ABMR_07K21	B	B		A	A		A	A		B	B		B	B		A	A		B	B		A	A		A	A		B	B		B	B		A	A		B	B		A	A		B	B		A	A		A
CABMR_07K23	A	A		A	A		A	A		B	B		B	B		B	B		B	B		B	B		A	A		B	B		A	A		B	B		B	B		A	A		A	A		A	A		A
CABMR_07L05	B	B		B	B		A	A		A	A		A	A		A	A		A	A		A	A		B	B		A	A		A	A		A	A		A	A		A	A		A	A		A	A		A
ABMR_07L15	B	B		A	A		B	B		B	B		B	B		A	A		B	B		A	A		A	A		B	B		B	B		A	A		B	B		A	A		B	B		A	A		A
CABMR_07L22	A	A		B	B		B	B		B	B		A	A		A	A		B	B		B	B		B	B		A	A		B	B		A	A		B	B		A	A		B	B		A	A		B
CABMR_07M04	A	-		B	B		B	B		A	A		B	B		B	B		A	A		A	A		A	A		B	B		B	B		A	A		A	A		A	A		B	B		B	B		A
ABMR_07M08	B	B		B	B		B	B		B	B		A	A		B	B		B	B		B	B		A	A		B	B		A	A		A	A		A	A		B	B		A	A		A	A		B
CABMR_07M19	A	A		A	A		A	A		A	A		A	A		A	A		A	A		A	A		B	B		A	A		B	B		A	A		A	A		A	A		A	A		B	B		A
ABMR_07M20	B	B		A	A		A	A		B	B		B	B		B	B		B	B		A	A		A	A		A	A		-	B		A	A		-	B		B	B		A	A		B	B		B
ABMR_07M22	A	A		A	A		A	A		B	B		B	B		B	B		B	B		B	B		A	A		B	B		A	A		B	B		B	B		A	A		A	A		A	A		B
CABMR_07M23*	B	B		A	A		B	B		B	B		B	B		B	B		B	B		B	B		B	B		B	B		A	A		A	A		A	A		B	B		B	B		B	B		A
CABMR_07N05***	A	A		B	B		A	A		B	B		A	A		B	B		B	B		B	B		B	B		A	A		A	A		B	B		B	B		B	B		B	B		B	B		B
CABMR_07N16	A	A		B	B		A	A		A	A		A	A		A	A		B	B		B	B		B	B		A	A		A	A		A	A		B	B		A	A		B	B		B	B		B
ABMR_07N22	B	B		A	A		A	A		B	B		B	B		B	B		B	B		B	B		B	B		B	B		A	A		B	B		B	B		A	A		B	B		A	A		A
ABMR_07O07	B	B		A	A		A	A		B	B		B	B		B	B		B	B		B	B		B	B		B	B		A	X		B	B		A	A		A	A		A	A		A	A		A
ABMR_07O16	B	B		A	A		A	A		B	B		B	B		B	B		B	B		B	B		B	B		B	B		B	B		A	A		A	A		A	A		B	B		B	B		A
CABMR_07O23**	A	A		A	A		B	B		B	B		B	B		A	A		A	A		A	A		B	B		A	A		A	A		A	A		A	A		A	A		B	B		B	B		A
CABMR_07P03**	B	B		B	B		A	A		A	A		A	A		B	B		B	B		B	B		B	B		A	A		A	A		B	B		B	B		B	B		B	B		B	B		B
CABMR_07P09	B	B		A	A		A	A		B	B		B	B		B	B		B	B		A	A		A	A		A	A		B	B		A	A		B	B		B	B		A	A		B	B		B
CABMR_07P10	B	B		B	B		A	A		B	B		A	A		B	B		B	B		B	B		B	B		B	B		B	B		A	A		-	-		B	B		B	B		B	B		A
CABMR_07P12	A	A		A	A		B	B		B	B		B	B		B	B		B	B		B	B		B	B		B	B		A	A		B	B		-	B		A	A		A	A		B	B		B
CABMR_07P14	A	A		B	B		B	B		A	A		A	A		B	B		B	B		B	B		B	B		B	B		B	B		B	B		B	B		A	A		B	B		B	B		A
ABMR_07P16*	A	A		A	A		B	B		A	A		B	B		A	A		A	A		A	A		A	A		A	A		A	A		B	B		A	A		B	B		A	-		A	A		B
CABMR_08A19	B	B		B	B		A	A		B	B		B	B		B	B		B	B		A	A		A	A		A	A		B	B		A	A		B	B		A	A		B	B		A	A		B
CABMR_08B03	A	A		B	B		B	B		B	B		A	A		A	A		B	B		B	B		B	B		A	A		A	A		A	A		B	B		A	A		B	B		B	B		B
ABMR_08B17	B	B		A	A		B	B		A	A		A	A		B	B		A	A		B	B		A	A		A	A		B	B		A	A		B	B		A	A		A	A		B	B		A
CABMR_08B19	A	A		A	A		B	B		B	B		B	B		B	B		B	B		B	B		B	B		B	B		A	A		A	A		B	B		A	A		A	A		A	A		B
ABMR_08B24	A	A		A	A		B	B		B	B		B	B		A	A		A	A		A	A		B	B		A	A		A	A		A	A		A	A		X	A		B	B		B	B		A
ABMR_08D07	A	A		A	A		A	A		A	A		A	A		A	A		B	B		B	B		A	A		A	A		A	A		B	B		A	-		A	A		B	-		B	B		B
ABMR_08D20	B	B		B	B		A	A		B	B		B	B		A	A		A	A		B	B		B	B		B	B		A	A		B	B		A	A		B	B		A	A		B	B		A
CABMR_08E02*	A	A		A	A		B	B		A	A		B	B		B	B		B	B		B	B		B	B		B	B		A	A		A	A		B	B		A	A		A	A		A	A		B
CABMR_08E04	B	B		B	B		A	A		A	A		A	A		A	A		B	B		A	A		A	A		A	A		A	A		A	A		A	A		A	A		A	A		A	A		B
ABMR_08E05	B	B		B	B		B	B		B	B		A	A		B	B		B	B		B	B		A	A		B	B		A	A		A	A		A	A		B	B		A	A		A	A		B
ABMR_08E07	B	B		B	B		B	B		A	A		A	A		A	A		B	B		A	A		A	A		A	A		A	A		-	B		A	A		B	B		A	-		A	A		A
ABMR_08E12**	B	B		A	A		B	B		B	B		B	B		B	B		B	B		B	B		B	B		B	B		A	A		B	B		A	A		B	B		B	B		B	B		A
ABMR_08E14**	B	B		A	A		B	B		B	B		B	B		B	B		B	B		B	B		B	B		B	B		A	A		B	B		A	A		B	B		B	B		B	B		A
ABMR_08E22	A	A		A	A		A	A		B	B		A	A		A	A		B	B		B	B		B	B		B	B		B	B		A	A		A	A		B	B		B	B		B	B		A
ABMR_08F19	A	A		B	B		B	B		A	A		B	B		B	B		B	B		A	A		A	A		A	A		B	B		A	A		A	A		B	B		A	A		B	B		B
CABMR_08G14	B	B		B	B		A	A		A	A		A	A		A	A		A	A		A	A		B	X		A	A		A	A		A	A		A	A		A	A		A	A		A	A		A
ABMR_08H07	B	B		A	A		A	A		B	B		A	A		A	A		A	A		B	B		A	A		A	A		B	B		A	A		A	A		A	A		A	-		B	B		A
ABMR_08H21	B	B		A	A		A	A		B	B		A	A		A	A		A	A		B	B		A	A		A	A		B	B		A	A		A	A		A	A		A	A		B	B		A
CABMR_08I02	A	A		A	A		A	A		B	B		A	A		A	A		B	B		A	A		A	A		B	B		B	B		A	A		B	B		A	A		A	A		A	A		A
CABMR_08J01	A	A		B	B		A	A		B	B		B	B		A	A		A	A		B	B		A	A		B	B		B	B		B	B		A	A		B	B		A	A		B	B		A
CABMR_08J15	B	B		B	B		A	A		B	B		A	A		B	B		B	B		B	B		B	B		B	B		B	B		A	A		-	B		-	A		B	B		B	B		A
ABMR_08J16	B	B		A	A		A	A		B	B		B	B		B	B		B	B		B	B		B	B		B	B		B	B		A	A		A	A		A	A		B	B		B	B		A
CABMR_08K24	B	B		B	B		A	A		A	A		B	B		B	B		A	A		A	A		A	A		B	B		B	B		B	B		A	A		A	A		B	B		B	B		A
CABMR_08L05	A	A		B	B		B	B		A	A		B	B		B	B		B	B		A	A		A	A		A	A		B	B		A	A		A	A		B	B		A	A		A	A		B
CABMR_08L14	B	B		A	A		A	A		B	B		A	A		B	B		A	A		A	A		B	B		A	A		A	A		A	A		A	A		A	A		A	A		A	A		A
ABMR_08L19	B	B		B	B		B	B		B	B		B	B		B	B		B	B		A	A		B	B		B	B		A	A		A	A		B	B		B	B		B	B		B	B		B
ABMR_08M07	A	A		A	A		A	A		A	A		A	A		A	A		B	B		B	B		A	A		B	B		A	A		B	B		A	A		A	A		B	-		B	B		B
ABMR_08M18	B	B		A	A		A	A		B	B		A	A		A	A		B	B		A	A		B	B		B	B		B	B		A	A		A	A		A	A		A	A		A	A		A
ABMR_08M24	B	B		A	A		A	A		B	B		A	A		B	B		A	A		A	A		B	B		A	A		A	A		A	A		A	A		A	A		A	A		A	A		A
ABMR_08N09*	B	B		B	B		B	B		A	A		A	A		B	B		B	B		A	A		B	B		B	B		A	A		B	B		A	A		B	B		A	A		A	A		B
ABMR_08O13	B	B		A	A		A	A		B	B		A	A		B	B		A	A		A	A		B	B		A	A		A	A		A	A		A	A		A	A		A	A		A	A		A
CABMR_08O18	A	A		B	B		A	A		A	A		A	A		B	B		B	B		B	B		B	B		B	B		B	B		B	B		B	B		A	A		B	B		B	B		A
ABMR_08O21	B	B		B	B		A	A		A	A		A	A		A	A		B	B		A	A		A	A		A	A		A	A		A	A		A	A		A	A		A	A		A	A		B
ABMR_08P02	A	A		B	B		B	B		A	A		B	B		B	B		B	B		B	B		B	B		B	B		B	B		B	B		B	B		A	A		B	B		B	B		A
ABMR_08P09	A	A		A	A		A	A		B	B		B	B		B	B		B	B		B	B		A	A		B	B		A	A		B	B		A	A		A	A		A	A		A	A		B
ABMR_08P14	B	B		A	A		B	B		A	A		B	B		A	A		B	B		B	B		B	B		B	B		A	A		A	A		A	A		B	B		B	-		A	A		A
ABMR_08P15	B	B		B	B		A	A		A	A		A	A		A	A		B	B		A	A		A	A		A	A		A	A		A	A		A	A		A	A		A	A		A	A		B
Cag-0003	A	A		B	B		A	A		A	A		A	A		A	A		A	A		B	B		A	A		A	A		B	B		B	B		A	A		B	B		A	A		B	B		B
Cag-0006	B	B		A	A		B	B		B	B		B	B		A	A		B	B		A	A		A	A		B	B		B	B		A	A		B	B		A	A		B	B		A	A		A
Cag-0009	B	B		A	A		A	A		B	B		A	A		A	A		A	A		B	B		A	A		A	A		B	B		A	A		A	A		A	A		A	A		B	B		A
CAHMR_01A08	A	A		B	B		A	A		A	A		A	A		B	B		B	B		A	A		B	B		B	B		A	A		B	B		B	B		B	B		A	A		-	B		B
AHMR_01A09	A	A		B	B		A	A		A	A		A	A		A	A		B	B		B	B		B	B		A	A		A	A		A	A		B	B		A	A		B	B		B	B		B
AHMR_01A13	B	B		B	B		B	B		A	A		A	A		A	A		B	B		A	A		A	A		A	A		A	A		B	B		A	A		B	B		A	A		A	A		A
CAHMR_01A18	A	A		B	B		B	B		A	A		B	B		A	A		B	B		A	A		A	A		A	A		B	B		B	B		A	A		A	A		A	A		A	A		A
AHMR_01C04	B	B		A	A		A	A		B	B		A	A		A	A		B	B		A	A		B	B		B	B		B	B		A	A		B	B		A	A		A	A		A	A		-
AHMR_01C05	B	B		B	B		A	A		A	A		A	A		B	B		A	A		B	B		A	A		A	A		B	B		A	A		A	A		-	A		A	A		B	B		A
CAHMR_01C07*	A	A		B	B		A	A		A	A		A	A		B	B		B	B		A	A		B	B		B	B		A	A		B	B		B	B		B	B		A	A		B	B		B
AHMR_01C14	B	B		A	A		B	B		A	A		B	B		A	A		B	B		B	B		B	B		B	B		A	A		A	A		A	A		B	B		B	B		A	A		A
CAHMR_01C18	A	A		A	A		B	B		A	A		B	B		B	B		B	B		B	B		B	B		B	B		A	A		A	A		B	B		-	A		A	A		A	A		B
AHMR_01D07	B	B		B	B		-	B		B	B		A	A		B	B		B	B		B	B		A	A		B	B		A	A		A	A		A	A		B	B		A	A		A	-		B
AHMR_01D11**	A	A		B	B		A	A		A	A		A	A		B	B		B	B		A	A		B	B		A	A		A	A		B	B		B	B		B	B		A	A		B	B		B
CAHMR_01F01	A	A		B	B		A	A		B	B		A	A		A	A		B	B		B	B		B	B		A	A		A	A		A	A		A	A		B	B		B	B		B	B		A
AHMR_01F17	B	B		A	A		A	A		B	B		A	A		B	B		B	B		B	B		B	B		B	B		B	B		A	A		A	A		A	A		A	A		A	A		A
AHMR_01F19	A	A		A	A		A	A		A	A		B	B		B	B		B	B		A	A		A	A		B	B		B	B		A	A		A	A		A	A		A	A		A	A		A
CAHMR_01H06	B	B		A	A		B	B		B	B		-	B		A	A		-	B		A	A		A	A		B	B		B	B		A	A		B	B		A	A		B	B		A	A		A
AHMR_01H09	-	B		B	B		B	B		B	B		A	A		B	B		B	B		-	B		A	A		-	-		A	A		-	A		A	A		B	B		A	A		A	A		B
AHMR_01J11	B	B		A	A		B	B		B	B		B	B		B	B		B	B		B	B		B	B		B	B		A	A		A	A		A	A		B	B		B	B		B	B		A
AHMR_01J17	B	B		B	B		A	A		A	A		B	B		A	A		A	A		B	B		B	B		A	A		A	A		B	B		A	A		B	B		A	A		B	B		A
AHMR_01J19	A	A		B	B		A	A		A	A		B	B		A	A		A	A		B	B		A	A		B	B		B	B		B	B		A	A		B	B		A	A		B	B		A
AHMR_01K09	A	A		A	A		B	B		B	B		B	B		A	A		A	A		A	A		B	B		A	A		A	A		B	B		B	B		A	A		B	B		B	B		A
AHMR_01K10	A	A		B	B		B	B		A	A		B	B		B	B		B	B		-	-		A	A		-	-		-	B		-	A		A	A		B	B		-	B		A	A		B
CAHMR_01K12**	A	A		A	A		B	B		B	B		B	B		A	A		A	A		A	A		B	B		A	A		A	A		A	A		A	A		B	A		B	-		B	B		A
AHMR_01L11	-	B		A	A		B	-		A	A		A	A		B	B		A	A		-	-		A	A		A	A		B	B		A	A		B	B		A	A		A	A		B	B		A
AHMR_01L13	B	B		A	A		A	A		B	B		A	A		B	B		A	A		A	A		B	B		A	A		A	A		A	A		A	A		A	A		A	A		A	A		A
AHMR_01M16	B	B		B	B		A	A		B	B		B	B		A	A		B	B		A	A		A	A		A	A		B	B		A	A		B	B		A	A		B	B		A	A		B
CAHMR_01N01	B	B		B	B		A	A		B	B		A	A		B	B		B	B		B	B		B	B		B	B		A	A		A	A		B	B		A	A		-	B		A	A		B
CAHMR_01N11	A	A		A	A		B	B		B	B		B	B		A	A		A	A		A	A		B	B		A	A		A	A		B	B		A	A		A	A		B	B		B	B		A
CAHMR_01N23	B	B		A	A		A	A		B	B		A	A		B	B		A	A		A	A		B	B		A	A		A	A		A	A		A	A		A	A		A	A		A	A		A
CAHMR_01O02	A	A		A	A		B	B		B	B		B	B		A	A		A	A		A	A		B	B		A	A		A	A		A	A		A	A		-	A		B	B		B	B		A
AHMR_02A08	-	B		A	A		A	A		B	B		A	A		B	B		-	-		B	B		A	A		-	-		-	-		A	A		B	B		B	-		A	A		A	A		A
CAHMR_02A19	B	B		B	B		B	B		B	B		A	A		B	B		B	B		B	B		A	A		B	B		A	A		A	A		A	A		B	B		A	A		A	A		B
AHMR_02B03	B	B		A	A		B	B		B	B		A	A		A	A		A	A		A	A		B	B		B	B		B	B		A	A		B	B		B	B		A	A		A	A		A
AHMR_02B11	B	B		B	B		A	A		B	B		B	B		A	A		A	A		B	B		A	A		B	B		A	A		B	B		A	A		B	B		A	A		A	A		A
CAHMR_02C06	A	A		A	A		A	-		B	B		B	B		B	B		B	B		B	B		A	A		B	B		A	A		B	B		B	B		A	A		A	A		A	A		A
AHMR_02C18	A	A		A	A		A	A		A	A		B	B		B	B		B	B		A	A		A	A		B	B		B	B		A	A		A	A		A	A		A	A		A	A		A
CAHMR_02D04	B	B		A	A		A	A		B	B		B	B		B	B		B	B		A	A		A	A		A	A		A	A		A	A		B	B		B	B		A	-		B	B		B
CAHMR_02G20*	B	B		A	A		B	B		B	B		B	B		B	B		B	B		B	B		B	B		B	B		A	A		A	A		A	A		B	B		B	B		B	B		A
AHMR_02H08	A	A		B	B		A	A		A	A		A	A		A	A		B	B		B	B		B	B		A	A		-	A		A	A		B	B		A	A		B	B		B	B		B
CAHMR_02H17	A	A		A	A		A	A		B	B		-	A		B	B		A	A		A	A		A	A		A	A		B	B		A	A		B	B		B	B		B	B		A	A		B
AHMR_02I13	B	B		A	A		A	A		A	A		A	A		B	B		A	A		A	A		B	B		A	A		A	A		A	A		A	A		A	A		B	B		A	A		A
CAHMR_02J16	B	B		A	A		B	B		A	A		A	A		B	B		A	A		B	B		A	A		A	A		B	B		A	A		B	B		A	A		A	A		B	B		A
AHMR_02K05	B	B		B	B		A	-		B	-		B	B		B	B		B	B		-	A		A	-		A	A		B	B		A	A		B	B		A	A		B	B		A	A		B
AHMR_02K20	B	B		A	A		B	B		-	B		B	B		A	A		-	B		B	B		A	-		B	B		B	B		A	A		B	B		A	A		A	A		B	B		A
AHMR_02L02	B	B		B	B		B	B		B	B		A	A		B	B		B	B		-	B		A	A		B	B		A	A		-	A		A	A		-	B		A	A		A	A		B
CAHMR_02M02	B	B		B	B		B	B		A	A		A	A		A	A		B	B		A	A		A	A		A	A		A	A		B	B		A	A		B	B		A	A		A	A		A
AHMR_02M23	A	A		B	B		B	B		A	A		B	B		B	B		B	B		A	A		A	A		A	A		B	B		A	A		A	A		B	B		A	A		B	B		B
AHMR_02N03	A	A		B	B		A	A		B	B		B	B		A	A		A	A		B	B		A	A		B	B		B	B		B	B		A	A		B	B		A	A		A	A		A
CAHMR_02N09	A	A		A	A		A	A		A	A		A	A		A	A		B	B		B	B		A	A		A	A		A	A		B	B		A	A		A	A		B	B		B	B		B
AHMR_02O18	A	A		B	B		A	A		A	A		A	A		A	A		A	A		A	A		B	B		-	-		A	A		A	A		A	A		A	A		A	A		B	B		A
CAHMR_02O22	B	B		A	A		A	A		B	B		A	A		A	A		A	A		B	B		A	A		A	A		B	B		A	A		A	A		A	A		A	A		B	B		A
CAHMR_02P01***	A	A		B	B		A	A		B	B		A	A		B	B		B	B		B	B		B	B		A	A		A	A		B	B		B	B		B	B		B	B		B	B		B
CAHMR_02P17	A	A		B	B		A	A		B	B		A	A		B	B		B	B		B	B		B	B		A	A		A	A		A	A		B	B		A	A		B	B		B	B		B
CAHMR_03A06	B	B		A	A		A	A		B	B		A	A		A	A		B	B		A	A		B	B		B	B		B	B		A	A		A	A		A	A		A	A		A	A		A
AHMR_03A12	A	A		A	A		A	A		B	B		A	A		A	A		B	B		B	B		B	B		B	B		B	B		A	A		A	A		B	B		B	B		B	B		A
AHMR_03A13	B	B		B	-		A	A		B	B		B	B		A	A		A	A		B	B		A	A		B	B		A	A		B	B		A	A		B	B		A	A		A	A		A
CAHMR_03A17	B	B		B	B		A	A		B	B		B	B		A	A		A	A		B	B		A	A		B	B		A	A		-	B		A	A		B	B		A	A		A	A		A
AHMR_03A21	A	A		A	A		B	B		A	A		B	B		B	B		B	B		A	A		B	B		B	B		B	B		A	A		B	B		A	A		B	B		A	A		A
CAHMR_03A23*	B	B		B	B		A	A		A	A		A	A		B	B		B	B		B	B		B	B		B	B		B	B		A	A		B	B		A	A		B	B		B	B		A
AHMR_03B19	A	A		B	B		B	B		A	A		B	B		B	B		B	B		A	A		A	A		A	A		B	B		A	A		A	A		B	B		A	A		A	A		B
AHMR_03B22**	B	B		A	A		A	A		A	A		A	A		A	A		B	B		B	B		B	B		B	B		A	A		A	A		B	B		A	A		B	B		B	B		B
CAHMR_03C06	A	A		A	A		A	-		B	B		A	A		A	A		B	B		B	B		B	B		B	B		B	B		A	A		A	A		B	B		B	-		B	B		A
AHMR_03C10	A	A		A	A		A	A		A	A		A	A		A	A		B	B		-	B		A	A		A	A		A	A		B	B		A	A		A	A		B	B		B	B		B
AHMR_03C18	B	B		A	A		A	A		B	-		A	A		B	B		A	A		A	A		B	B		A	A		A	A		A	A		A	A		A	A		A	A		A	-		A
AHMR_03D06	B	B		A	A		A	A		B	B		B	B		B	B		B	B		B	B		B	B		B	B		B	B		B	B		A	A		A	A		A	A		A	A		A
AHMR_03E08	B	B		A	A		B	B		A	A		A	A		B	B		A	A		B	B		A	A		A	A		B	B		A	A		A	A		-	A		A	A		B	B		A
CAHMR_03E19	B	B		A	A		A	A		B	-		B	B		A	A		B	B		A	A		A	A		A	A		B	B		A	A		B	B		A	A		-	B		A	A		B
CAHMR_03F08	A	A		A	A		A	A		B	B		B	B		B	B		B	B		A	A		A	A		B	B		B	B		A	A		A	A		A	A		A	A		A	A		A
CAHMR_03F10	A	A		B	B		B	-		A	A		B	B		B	B		B	B		B	B		A	A		A	A		A	A		A	A		A	A		A	A		B	-		B	B		A
AHMR_03G13	A	A		A	A		A	A		B	B		B	B		B	B		B	B		B	B		A	A		B	B		A	A		B	B		A	A		A	A		A	A		A	A		B
CAHMR_03H08	A	A		B	B		B	B		A	A		B	B		B	B		B	B		B	B		B	B		B	B		B	B		B	B		B	B		A	A		B	B		B	B		A
CAHMR_03H20	B	B		A	A		B	B		B	B		A	A		A	A		A	A		A	A		B	B		B	B		B	B		A	A		B	B		B	B		A	A		A	-		A
CAHMR_03H24	B	B		A	A		B	B		B	B		A	A		A	A		A	A		A	A		B	B		B	B		B	B		A	A		B	B		B	B		A	A		A	A		A
CAHMR_03I02**	A	A		B	B		A	A		B	B		A	A		B	B		B	B		B	B		B	B		A	A		A	A		B	B		A	A		B	B		-	B		B	B		B
CAHMR_03I13	B	B		B	B		B	B		B	B		B	B		B	B		B	B		A	A		B	B		B	B		A	A		A	A		B	B		B	B		B	B		B	B		B
AHMR_03I22	A	A		B	B		A	A		B	B		B	B		A	A		A	A		B	B		A	A		B	B		B	B		B	B		A	A		B	B		A	A		-	B		A
AHMR_03J22	B	B		A	A		B	B		B	B		A	A		B	B		B	B		A	A		B	B		A	A		A	A		A	A		A	A		A	A		A	A		B	B		B
CAHMR_03J23*	A	A		A	A		A	A		A	A		A	A		A	A		A	A		A	A		A	A		B	B		A	A		B	B		A	A		B	B		A	-		A	A		B
CAHMR_03K05	A	A		A	A		A	A		A	A		A	A		A	A		A	A		A	A		B	B		A	A		-	B		A	A		A	A		A	A		A	A		B	B		A
AHMR_03K08	B	B		A	A		A	A		B	B		A	A		B	B		B	B		-	B		B	B		-	-		B	B		A	A		A	A		A	A		A	A		A	A		A
CAHMR_03K09	A	A		B	B		B	B		B	B		B	B		B	B		A	A		A	A		B	B		A	A		A	A		B	B		B	B		A	A		B	B		B	B		A
AHMR_03K18	B	B		B	B		B	B		B	B		A	A		B	B		B	B		B	B		A	A		B	B		A	A		A	A		A	A		B	B		A	A		A	A		B
CAHMR_03L03	B	B		A	A		B	B		A	A		B	B		A	A		B	B		B	B		B	B		B	B		A	A		A	A		A	A		B	B		B	B		B	B		A
AHMR_03L16	A	A		A	A		-	B		-	-		B	B		B	B		B	B		B	B		B	B		B	B		A	A		B	B		B	B		A	A		A	A		B	B		B
CAHMR_03M24	A	A		A	A		A	A		B	B		B	B		B	B		B	B		A	A		A	A		B	B		B	B		A	A		A	A		A	A		A	A		A	A		A
AHMR_03N09	-	-		B	B		B	B		B	B		A	A		B	B		B	B		B	B		A	A		B	B		A	A		A	A		A	A		B	B		A	A		A	A		B
AHMR_03N13	B	B		A	A		A	A		A	A		A	A		A	A		A	A		A	A		B	B		B	B		B	B		B	B		A	A		B	B		A	A		A	A		A
AHMR_03N15	A	A		A	A		A	A		-	B		-	B		B	B		B	B		B	B		B	B		B	B		B	B		A	A		A	A		A	A		B	B		B	B		A
CAHMR_03N21	A	A		A	A		A	A		A	A		A	A		A	A		A	A		B	B		A	A		A	A		B	-		A	A		A	A		A	A		A	A		-	B		A
AHMR_03N23	B	B		A	A		B	-		A	A		A	A		B	B		A	A		-	B		A	A		A	A		B	-		A	A		B	B		A	A		A	A		B	B		A
CAHMR_03N24	B	B		A	A		A	A		B	B		A	A		B	B		B	B		B	B		A	A		A	A		A	A		A	A		B	B		B	B		A	A		A	A		A
CAHMR_03O04	A	A		A	A		B	B		B	B		B	B		A	A		A	A		A	A		B	B		A	A		A	A		B	B		B	B		-	A		B	B		B	B		A
AHMR_03O06	B	B		A	A		A	A		B	B		B	B		B	B		B	B		B	B		B	B		B	B		A	A		B	B		A	A		A	A		A	A		A	A		A
AHMR_03O19	B	B		A	A		A	A		B	B		B	B		B	B		B	-		B	B		B	B		B	-		A	A		-	B		A	B		A	A		-	B		A	A		A
CAHMR_03P06	B	B		A	A		B	B		B	B		B	B		B	B		B	B		B	B		B	B		B	B		A	A		A	A		A	A		B	B		-	B		B	B		-
CAHMR_03P24	A	A		B	B		A	A		B	B		A	A		B	B		B	B		B	B		B	B		A	A		A	A		A	A		B	B		A	A		B	B		B	B		B
AHMR_04A17	B	B		A	A		B	B		B	B		B	B		A	A		B	B		B	B		A	-		B	B		B	B		A	A		B	B		A	A		A	A		B	B		A
CAHMR_04B11*	B	B		A	A		B	B		A	A		B	B		A	A		B	B		B	B		B	B		B	B		A	A		B	B		A	A		B	B		B	B		B	B		A
AHMR_04C03	B	B		A	A		A	A		B	B		A	A		B	B		A	A		A	A		B	B		A	A		A	A		A	A		A	A		A	A		A	A		A	A		A
AHMR_04C21	B	B		B	B		A	A		B	B		B	B		A	A		A	A		B	B		A	A		B	B		A	A		B	B		A	A		B	B		A	A		A	A		-
CAHMR_04C22	A	A		A	A		B	B		A	A		B	B		B	B		B	B		B	B		A	A		B	B		A	A		A	A		B	B		A	A		B	B		A	A		B
AHMR_04C23*	A	A		A	A		B	B		A	A		B	B		B	B		B	B		-	B		B	B		B	B		A	A		A	A		B	B		A	A		A	A		A	A		B
CAHMR_04D02	B	B		B	B		A	A		B	B		B	B		A	A		A	A		B	B		A	A		B	B		A	A		B	B		A	A		B	B		A	A		A	A		A
CAHMR_04D20	A	A		B	B		B	B		B	B		B	B		B	B		A	A		A	A		B	B		A	A		A	A		B	B		B	B		A	A		B	B		B	B		A
AHMR_04E06	B	B		B	B		B	B		B	B		B	B		B	B		B	B		A	A		B	B		B	B		A	A		A	A		B	B		B	B		B	B		-	-		-
CAHMR_04E23	A	A		B	B		A	A		B	B		A	A		A	A		A	A		B	B		B	B		A	A		A	A		B	B		B	B		A	A		B	B		B	B		A
CAHMR_04F07	A	A		B	B		A	A		B	B		A	A		A	A		B	B		B	B		B	B		A	A		A	A		A	A		A	A		B	B		B	B		B	B		A
CAHMR_04F10	B	B		A	A		B	B		B	B		B	B		B	B		B	B		-	B		B	B		B	B		A	A		A	A		A	A		B	B		B	B		B	B		A
AHMR_04F23	B	B		A	A		A	A		B	B		B	B		B	B		B	B		B	B		B	B		B	B		A	A		B	B		B	B		A	A		B	B		A	A		A
CAHMR_04G23	A	A		A	A		A	A		B	B		A	A		B	B		A	A		A	A		A	A		A	A		A	A		B	B		B	B		B	B		A	A		A	A		B
AHMR_04H11	A	A		B	B		A	-		A	A		A	A		A	A		A	A		A	A		B	B		A	A		A	A		A	A		B	B		A	A		A	A		A	A		A
AHMR_04H12**	B	B		A	A		B	B		B	B		B	B		B	B		B	B		B	B		B	B		B	B		A	A		B	B		A	A		B	B		B	B		B	B		A
AHMR_04I03	A	A		B	B		A	A		A	A		A	A		A	A		B	B		B	B		B	B		A	A		A	A		A	A		B	B		A	A		B	B		B	B		B
CAHMR_04I09	A	A		B	B		B	B		A	A		B	B		B	B		A	A		B	B		B	B		B	B		B	B		B	B		B	B		B	B		B	B		A	A		B
CAHMR_04I10	A	A		A	A		A	A		A	A		A	A		A	A		B	B		B	B		A	A		A	A		A	A		B	B		A	A		A	A		B	B		B	B		B
CAHMR_04I12	A	A		B	B		B	B		A	A		B	B		B	B		B	B		B	B		A	A		A	A		A	A		A	A		A	A		A	A		B	B		B	B		A
AHMR_04I20	B	B		B	B		B	B		B	B		A	A		B	B		B	B		B	B		A	A		B	B		A	A		A	A		A	A		B	B		A	A		A	A		B
CAHMR_04J17	B	B		A	A		A	A		B	B		A	A		B	B		B	B		B	B		A	A		B	B		A	A		A	A		B	B		B	B		B	B		A	A		B
AHMR_04K19	B	B		B	B		A	A		B	B		B	B		B	B		B	B		A	A		B	B		A	A		B	B		A	A		B	B		B	B		-	B		-	-		A
CAHMR_04L02	B	B		B	B		A	A		A	A		A	A		A	A		B	B		A	A		A	A		A	A		A	A		A	A		A	A		A	A		A	A		A	A		B
AHMR_04L05	B	B		B	B		B	B		B	B		A	A		B	B		B	B		B	B		A	A		B	B		A	A		A	A		A	A		B	B		A	A		A	A		B
AHMR_04M01	A	A		B	B		A	A		A	A		A	A		A	A		B	B		B	B		B	B		A	A		A	A		-	A		B	B		A	A		B	B		B	B		B
AHMR_04M04	B	B		A	A		B	B		A	A		B	B		A	-		B	B		B	B		B	B		B	B		A	A		B	B		A	A		B	B		B	B		B	B		A
AHMR_04N02	B	B		B	B		A	A		A	A		A	A		A	A		A	A		A	A		B	B		A	A		A	A		A	A		A	A		A	A		A	A		A	A		A
CAHMR_04N24	A	A		A	A		A	A		B	B		A	A		B	B		A	A		A	A		A	A		A	A		B	B		A	A		B	B		B	B		B	B		A	A		B
AHMR_04O20	A	A		A	A		A	A		B	B		B	B		B	B		B	B		-	B		A	A		B	B		A	A		B	B		A	A		A	A		A	A		A	A		B
AHMR_04P06	A	A		B	B		A	-		B	B		A	A		A	A		B	B		-	B		B	B		A	A		A	A		A	A		B	B		A	A		B	B		B	B		B
AHMR_04P17	A	A		A	A		A	A		A	A		A	A		A	A		B	B		B	B		A	A		A	A		A	A		B	B		A	A		A	A		B	B		B	B		B
CAHMR_05B20	A	A		A	A		B	B		B	B		A	A		B	B		B	B		A	A		A	A		A	A		A	A		A	A		B	B		B	B		A	A		B	B		B
AHMR_05C17*	A	A		B	B		A	A		A	A		A	A		B	B		B	B		A	A		-	B		B	B		A	A		B	B		B	B		B	B		A	A		B	-		-
AHMR_05C18	B	B		A	A		A	A		B	B		B	B		A	A		B	B		A	A		A	A		B	B		B	B		A	A		B	B		A	A		-	B		A	A		A
CAHMR_05C20***	A	A		B	B		A	A		B	B		A	A		B	B		B	B		B	B		B	B		A	A		A	A		B	B		B	B		B	B		B	B		B	B		B
AHMR_05D01	B	B		B	B		B	B		B	B		A	A		B	B		B	B		B	B		A	A		B	B		A	A		A	A		A	A		B	B		A	A		A	A		B
CAHMR_05D06	A	A		A	A		A	A		A	A		A	A		A	A		B	B		-	B		A	A		A	A		A	A		-	B		A	A		A	A		-	B		B	B		B
AHMR_05D09	A	A		A	A		A	A		B	B		B	B		B	B		B	B		B	B		B	B		B	B		B	B		A	A		A	A		A	A		B	B		B	B		A
AHMR_05D13	A	A		A	A		B	B		B	B		A	A		A	A		B	B		A	A		A	A		B	B		B	B		B	B		B	B		A	A		A	A		A	A		A
CAHMR_05D24	B	B		B	B		A	A		B	B		B	B		A	A		A	A		B	B		A	A		B	B		A	A		B	B		A	A		B	B		A	A		A	A		A
CAHMR_05E03	A	A		A	A		A	A		A	A		A	A		A	A		B	B		B	B		A	A		A	A		A	A		B	B		A	A		A	A		B	B		B	B		B
CAHMR_05E06***	B	B		B	B		A	A		A	A		A	A		B	B		B	B		B	B		B	B		A	A		A	A		B	B		B	B		B	B		B	B		B	B		B
AHMR_05E23**	B	B		B	B		B	B		A	A		A	A		B	B		B	B		B	B		B	B		B	B		A	A		B	B		A	A		B	B		A	A		A	A		B
AHMR_05F05	A	A		A	A		A	A		A	A		B	B		B	B		B	B		A	A		A	A		B	B		B	B		A	A		A	A		A	A		A	A		A	A		-
AHMR_05G04	A	A		B	B		A	-		-	A		A	A		B	B		-	B		A	A		B	B		B	B		A	A		B	B		B	B		B	B		A	A		B	B		B
AHMR_05G06	B	B		A	A		A	A		B	B		B	B		B	B		B	B		-	B		-	B		B	B		A	A		B	B		B	B		A	A		B	B		A	A		A
CAHMR_05G10	B	B		A	A		B	B		B	B		A	A		A	A		A	A		A	A		B	B		B	B		B	B		A	A		B	B		B	B		A	A		A	A		A
AHMR_05G11	A	A		A	A		A	A		B	B		B	B		-	B		B	B		A	A		A	A		B	B		B	B		A	A		A	A		A	A		A	A		A	A		A
CAHMR_05H16	A	A		A	A		B	B		B	B		B	B		B	B		B	B		B	B		B	B		B	B		A	A		B	B		B	B		A	A		A	A		B	B		B
AHMR_05H22*******	A	A		A	A		A	A		A	A		A	A		A	A		A	A		A	A		A	A		A	A		A	A		A	A		A	A		A	A		A	A		A	A		A
AHMR_05I02	B	B		B	B		B	B		A	A		A	A		A	A		B	B		A	A		A	A		A	A		A	A		B	B		A	A		B	B		A	A		A	A		A
CAHMR_05I04	A	A		A	A		B	B		B	B		B	B		B	B		B	B		B	B		B	B		B	B		A	A		B	B		B	B		A	A		A	A		B	B		B
AHMR_05I05	A	A		A	A		B	B		B	B		B	B		B	B		B	B		B	B		B	-		B	B		A	A		B	B		B	B		A	A		A	A		A	A		B
AHMR_05I22	B	B		A	A		-	-		B	B		A	A		B	B		B	B		B	B		A	A		A	A		A	A		A	A		B	B		B	B		A	-		A	A		A
AHMR_05J13*	A	A		A	A		B	B		B	B		B	B		A	A		A	A		A	A		B	B		A	A		A	A		A	A		-	A		A	A		B	B		B	B		A
AHMR_05J17	B	B		B	B		B	B		B	B		B	B		B	B		B	B		A	A		B	B		B	B		A	A		A	A		B	B		B	B		-	B		B	B		B
AHMR_05J22	B	B		B	B		A	A		A	A		B	B		A	A		A	A		B	B		B	B		A	A		A	A		A	A		A	A		B	B		B	B		A	A		A
AHMR_05J23	B	B		B	B		A	A		B	B		A	A		B	B		B	B		B	B		B	B		A	A		B	B		A	A		B	B		B	B		B	B		A	A		A
AHMR_05K03	A	A		A	A		B	-		B	B		B	B		B	B		B	B		B	B		B	B		B	B		A	A		A	A		B	B		A	A		A	A		A	A		B
AHMR_05K06	B	B		B	B		B	B		B	B		A	A		B	B		B	B		B	B		A	A		B	B		A	A		A	A		A	A		B	B		A	A		A	A		B
AHMR_05K07	A	A		B	B		A	A		B	B		A	A		B	B		B	B		B	B		-	B		B	B		A	A		A	A		B	B		A	A		B	B		A	A		B
AHMR_05K08	A	A		B	B		B	B		B	B		A	A		A	A		B	B		B	B		B	B		A	A		A	A		A	A		B	B		A	A		B	B		B	B		B
CAHMR_05K11**	A	A		B	B		A	A		B	B		A	A		B	B		B	B		B	B		B	B		A	A		A	A		B	B		A	A		B	B		B	B		B	B		B
AHMR_05K12	B	B		A	A		B	-		B	B		A	A		B	B		B	B		B	B		A	A		A	-		A	A		A	A		B	B		B	B		A	A		A	A		A
AHMR_05K18	A	A		B	B		A	A		A	A		A	A		A	A		B	B		B	B		B	B		A	A		A	A		A	A		B	B		A	A		B	B		B	B		B
AHMR_05L02	B	B		B	B		A	A		B	B		A	A		B	B		B	B		B	B		B	B		B	B		A	A		A	A		B	B		A	A		B	B		-	-		B
AHMR_05L10	A	A		A	A		B	B		B	B		B	B		A	A		A	A		A	A		B	B		A	A		A	A		A	A		A	A		A	A		B	B		B	B		A
CAHMR_05M06	B	B		B	B		B	B		A	A		A	A		A	A		B	B		A	A		A	A		A	A		A	A		B	B		A	A		B	B		A	A		A	A		A
CAHMR_05M17**	A	A		B	B		A	A		A	A		A	A		B	B		B	B		A	A		B	B		B	B		A	A		B	B		B	B		B	B		A	A		B	B		B
AHMR_05N01**	A	A		A	A		A	A		A	A		A	A		A	A		A	A		A	A		A	A		B	B		A	A		B	B		A	A		B	B		A	A		A	A		B
CAHMR_05N09	A	A		B	B		A	A		A	A		B	-		B	B		B	B		B	B		A	A		A	A		A	A		A	A		A	A		A	A		B	B		B	B		A
AHMR_05N17	A	A		A	A		A	A		B	B		A	A		A	A		B	B		A	A		A	A		B	B		B	B		A	A		B	B		A	A		B	B		A	A		A
AHMR_05N19	B	B		A	-		A	A		B	B		B	B		A	A		B	B		A	A		A	A		B	B		B	B		A	A		B	B		-	A		B	B		A	A		-
AHMR_05N21*	B	B		A	A		B	B		B	B		B	B		B	B		B	B		B	B		B	B		B	B		A	A		A	A		A	A		B	B		B	B		B	B		A
AHMR_05O01	B	B		B	B		B	B		B	B		A	A		B	B		B	B		B	B		A	A		B	B		A	A		A	A		A	A		B	B		A	A		A	A		B
CAHMR_05O12**	B	B		A	A		A	A		A	A		A	A		A	A		B	B		B	B		B	B		B	B		A	A		A	A		B	-		-	A		B	B		B	B		B
CAHMR_05P09	A	A		A	A		A	A		A	A		A	A		A	A		B	B		B	B		A	A		A	A		A	A		B	B		A	A		A	A		B	B		B	B		B
AHMR_05P19	B	B		A	A		A	A		B	A		A	A		A	A		A	A		A	A		B	-		A	B		B	B		B	B		A	-		B	A		A	-		A	A		-
CAHMR_06A08	B	B		A	A		B	-		A	A		A	A		B	B		A	A		-	B		A	A		A	A		B	B		A	A		B	B		A	A		A	A		B	B		A
CAHMR_06B02**	B	B		B	B		A	A		A	A		A	A		B	B		B	B		B	B		B	B		A	A		A	A		B	B		B	B		B	B		B	B		B	B		B
AHMR_06B15	A	A		B	B		B	B		A	A		B	-		B	B		B	B		A	A		A	A		A	A		B	B		A	A		A	A		B	B		A	A		A	A		B
AHMR_06C14	B	B		B	B		B	B		B	B		A	A		B	B		B	B		B	B		A	A		B	B		A	A		A	A		A	A		B	B		A	A		A	A		B
AHMR_06C24	A	A		A	A		B	B		A	A		B	B		B	B		B	B		B	B		A	A		B	B		A	A		A	A		B	B		A	A		B	B		A	A		B
CAHMR_06D05	B	B		A	A		A	A		B	B		B	B		B	B		B	B		B	B		B	B		B	B		A	A		B	B		A	A		A	A		A	A		A	-		A
AHMR_06E22	A	A		B	B		A	A		B	B		B	B		A	A		A	A		B	B		A	A		B	B		B	B		B	B		A	A		B	B		A	A		A	A		A
AHMR_06F02	A	A		B	B		A	A		B	B		A	A		A	A		A	A		B	B		B	B		A	A		A	A		B	B		A	-		A	A		B	-		B	B		B
AHMR_06F12**	B	B		-	B		B	B		A	A		A	A		B	B		B	B		A	B		B	B		B	B		A	A		B	B		A	A		B	B		A	A		A	A		-
AHMR_06F15	B	B		B	B		A	A		A	A		A	A		B	B		B	B		B	B		B	B		B	B		B	B		A	A		B	B		A	A		B	B		B	B		A
AHMR_06F24	B	B		A	A		A	A		-	B		B	B		B	B		B	B		A	-		B	B		B	B		B	B		A	A		B	B		-	A		-	B		A	A		A
CAHMR_06G09	B	B		A	A		A	A		A	A		B	B		B	B		A	A		A	A		A	A		A	A		B	B		B	B		A	A		A	A		A	A		A	A		A
CAHMR_06G21	A	A		A	A		A	A		B	B		A	A		B	B		A	A		A	A		A	A		A	A		A	A		B	B		B	B		B	B		A	A		B	B		B
CAHMR_06H07	A	A		A	A		A	A		A	A		A	A		A	A		A	A		A	A		B	B		A	A		B	B		A	A		A	A		A	A		A	A		B	B		A
AHMR_06H09**	B	B		A	A		A	A		A	A		A	A		A	A		B	B		B	B		B	B		B	B		A	A		A	A		B	B		A	A		B	B		B	B		B
AHMR_06H10	B	B		A	A		A	-		B	B		B	B		B	B		B	B		-	B		B	B		B	B		A	A		B	B		B	B		A	A		A	-		A	A		A
AHMR_06I06	B	B		A	A		A	A		B	B		B	B		B	B		B	B		B	B		B	B		B	B		B	B		A	A		A	A		A	A		B	B		B	B		A
CAHMR_06I09	A	A		A	A		B	B		B	B		B	B		A	A		A	A		A	A		B	B		A	A		A	A		B	B		A	A		A	A		B	B		B	B		A
AHMR_06I12	B	B		B	B		B	-		B	B		A	A		B	B		B	B		B	B		A	A		B	B		A	A		A	A		A	A		B	B		A	A		A	A		B
AHMR_06I15	B	B		A	A		B	B		A	A		A	A		B	B		A	A		B	B		A	A		A	A		B	-		A	A		B	-		A	A		A	A		B	B		A
AHMR_06I21*	A	A		A	A		A	A		B	B		B	B		B	B		B	B		B	B		B	B		B	B		A	A		B	B		B	B		A	A		A	A		A	A		B
AHMR_06J03	A	A		A	A		A	A		A	A		A	A		A	A		B	B		B	B		A	A		A	A		A	A		B	B		A	A		A	A		B	B		B	B		B
AHMR_06J09	B	B		A	A		A	-		B	B		A	A		B	B		A	A		-	A		B	B		A	A		A	A		A	A		A	A		A	A		A	A		A	A		A
AHMR_06K03**	A	A		A	A		A	A		B	B		B	-		B	B		B	B		B	B		B	B		B	B		A	A		B	B		B	B		A	A		A	A		A	A		B
AHMR_06K09	-	-		A	A		A	A		B	B		A	A		B	B		A	A		A	A		B	B		A	A		A	A		A	A		A	A		A	A		A	A		A	A		A
AHMR_06K12	B	B		A	A		B	B		A	A		B	B		A	A		B	B		-	B		B	B		B	B		A	A		A	A		A	A		B	B		B	B		A	A		A
CAHMR_06K18	A	A		B	B		A	A		B	B		A	A		B	B		B	B		B	B		B	B		A	A		A	A		-	A		B	B		A	A		B	B		B	B		B
CAHMR_06K21	B	B		B	B		B	B		B	B		B	B		B	B		B	B		A	A		B	B		B	B		A	A		A	A		B	B		B	B		B	B		B	B		B
AHMR_06K23	A	A		B	B		A	A		A	A		A	A		A	-		B	B		B	B		B	B		A	A		A	A		-	-		B	B		A	A		B	-		B	B		B
AHMR_06L17	B	B		A	A		A	A		B	B		A	A		B	B		A	A		A	A		B	B		A	A		A	A		A	-		A	A		A	A		A	A		A	A		A
CAHMR_06L18*	A	A		A	A		B	B		B	B		B	B		B	B		B	B		B	B		-	B		B	B		A	A		A	A		B	B		A	A		A	A		A	A		B
AHMR_06M24	A	A		B	B		B	B		A	A		B	B		B	B		A	A		B	B		B	B		B	B		B	B		B	B		B	B		B	B		B	B		B	B		B
AHMR_06P03	A	A		A	A		A	A		B	B		B	B		B	B		B	B		B	B		A	A		B	B		A	A		B	B		A	A		A	A		A	A		A	A		B
AHMR_06P06	-	-		A	A		-	B		B	B		B	B		A	A		B	B		-	A		B	B		B	B		B	B		A	A		B	B		A	A		B	B		B	B		A
AHMR_07A04	B	B		B	B		A	A		A	A		A	A		A	A		A	A		A	A		B	B		A	A		A	A		A	A		A	A		A	A		A	A		A	A		A
AHMR_07A07	B	B		A	A		A	A		B	-		B	B		B	B		B	B		B	B		B	B		B	B		B	-		A	A		A	A		A	A		B	B		B	B		A
AHMR_07C04	A	A		B	B		A	A		B	B		A	A		A	A		A	A		B	B		B	B		A	A		A	A		B	B		B	B		-	A		B	B		B	B		B
CAHMR_07C05	A	A		A	A		A	A		A	A		A	A		A	A		A	A		A	A		B	B		A	A		B	B		A	A		A	A		A	A		A	A		B	B		A
AHMR_07C07**	B	B		A	A		B	-		B	B		B	B		B	B		B	B		-	B		B	B		B	B		A	A		B	B		A	A		B	-		B	B		B	B		A
AHMR_07C16	A	A		A	A		A	A		B	B		A	A		A	A		B	B		B	B		B	B		B	B		B	B		A	A		A	A		B	B		B	B		B	B		A
AHMR_07C17	B	B		A	A		B	-		B	B		B	B		B	B		B	B		B	B		A	A		B	B		B	B		B	B		B	B		-	B		B	B		A	A		-
CAHMR_07D15	B	B		A	A		B	B		A	A		A	A		B	B		A	A		B	B		A	A		A	A		B	B		A	A		-	A		A	A		A	A		B	B		A
AHMR_07D16	B	B		B	B		B	B		A	A		A	A		A	A		B	B		A	A		A	A		A	A		A	A		B	B		A	A		B	B		A	A		A	A		A
CAHMR_07D17	A	A		B	B		B	B		A	A		B	B		B	B		B	B		A	A		A	A		A	A		B	B		A	A		A	A		B	B		A	A		A	A		B
AHMR_07D22*	B	B		B	B		A	A		A	A		A	A		A	A		A	A		A	A		B	B		A	A		A	A		A	A		A	-		A	A		A	A		A	A		A
CAHMR_07E02	B	B		B	B		B	B		B	B		A	A		B	B		B	B		B	B		A	A		B	B		A	A		A	A		A	A		B	B		A	A		A	A		B
CAHMR_07F21	B	B		A	A		A	A		A	A		B	B		B	B		A	A		A	A		A	A		A	A		B	B		B	B		A	A		A	A		A	A		A	A		A
CAHMR_07G08	A	A		A	A		A	A		A	A		A	A		A	A		B	B		B	B		A	A		A	A		A	A		B	B		A	A		A	A		B	B		-	B		B
AHMR_07G12	B	B		B	B		B	B		B	B		A	A		B	B		B	B		B	B		A	A		B	B		A	A		A	A		A	A		B	B		A	A		A	A		B
CAHMR_07G23	B	B		B	B		A	A		A	A		A	A		A	A		A	A		A	A		B	B		-	-		A	A		-	A		A	A		A	A		A	A		A	A		A
CAHMR_07H13	A	A		B	B		A	A		B	B		A	A		A	A		A	A		B	B		B	B		A	A		A	A		A	A		A	A		A	A		B	B		B	B		B
CAHMR_07H22	A	A		A	A		A	A		A	A		A	A		A	A		B	B		B	B		A	A		A	A		A	A		B	B		A	A		A	A		B	B		B	B		B
CAHMR_07I02	B	B		A	A		A	A		A	A		A	A		A	A		A	A		A	A		B	B		B	B		B	B		B	B		A	A		B	B		A	A		A	A		A
CAHMR_07I22	A	A		A	A		A	A		A	A		A	A		A	A		B	B		B	B		A	A		A	A		A	A		B	B		A	A		A	A		B	B		B	B		B
CAHMR_07J01	A	A		A	-		A	A		A	A		A	A		A	A		A	A		B	B		A	A		A	A		B	B		A	A		A	A		A	A		A	A		B	B		A
AHMR_07J13	B	B		B	B		A	-		B	B		B	B		B	B		B	B		B	B		-	B		-	-		B	B		A	A		B	B		B	B		-	B		A	A		A
AHMR_07J21	B	B		A	A		A	A		B	B		A	A		B	B		B	B		B	B		A	A		B	B		A	A		A	A		B	B		B	-		B	B		A	A		B
CAHMR_07K01	A	A		B	B		A	A		A	A		A	A		B	B		B	B		B	B		B	B		B	B		B	B		B	B		B	B		A	A		B	B		B	B		A
AHMR_07L11	B	B		A	A		B	B		B	B		A	A		A	A		A	A		A	A		B	B		B	B		B	B		A	A		B	B		B	B		A	A		A	A		A
CAHMR_07L16	B	B		A	A		B	B		B	B		A	A		A	A		A	A		A	A		B	B		B	B		B	B		A	A		B	B		B	B		A	A		A	A		A
AHMR_07L21	B	B		A	A		A	A		B	B		B	B		A	A		B	B		A	A		A	A		B	B		B	B		A	A		B	B		A	A		B	B		A	A		A
AHMR_07M03	A	A		B	B		B	B		A	A		B	B		B	B		A	A		A	A		A	A		B	B		B	B		A	A		A	A		-	A		B	B		B	B		A
CAHMR_07N06	A	A		B	B		A	A		B	B		A	A		A	A		B	B		B	B		B	B		A	A		B	B		A	A		B	B		A	A		A	A		B	B		B
CAHMR_07P11	B	B		A	A		A	A		A	A		B	B		B	B		A	A		A	A		A	A		A	A		B	-		B	B		A	A		A	A		A	A		A	A		A
CAHMR_07P17	A	A		A	A		A	A		B	B		A	A		B	B		A	A		A	A		A	A		A	A		A	A		B	B		B	B		B	B		A	A		B	B		B
CAHMR_08A01*	B	B		A	A		B	B		B	B		B	B		B	B		B	B		B	B		B	B		B	B		A	A		B	B		A	A		B	B		-	-		B	B		A
AHMR_08A04	B	B		A	A		B	B		A	A		B	B		A	A		B	B		B	B		B	B		B	B		A	A		A	A		A	-		B	B		B	B		A	A		A
AHMR_08A13**	B	B		B	B		A	A		A	A		A	A		B	B		B	B		B	B		B	B		A	A		A	A		B	B		B	B		B	B		-	B		B	-		B
AHMR_08A17	B	B		A	A		B	B		A	A		A	A		B	B		A	A		B	B		A	A		A	A		B	B		A	A		B	B		A	A		A	A		B	B		A
AHMR_08B03	B	B		B	B		A	A		B	B		B	B		A	A		A	A		B	B		A	A		B	B		A	A		B	B		A	A		B	B		A	A		A	A		A
CAHMR_08B05**	B	B		A	A		B	B		-	B		B	B		B	B		B	B		B	B		B	B		B	B		A	A		B	B		A	A		B	B		B	B		B	B		A
AHMR_08B06	B	B		A	A		B	B		A	A		A	A		B	B		A	A		B	B		A	A		A	A		B	B		A	A		B	B		A	A		A	A		B	B		A
AHMR_08B07*	B	B		B	B		A	A		A	A		A	A		A	A		A	A		A	A		B	B		A	A		A	A		A	A		A	-		A	A		A	A		A	A		A
AHMR_08B12	B	B		A	A		B	B		A	A		A	A		B	B		A	A		B	B		A	A		A	A		-	-		-	A		B	B		A	A		A	-		B	B		A
CAHMR_08B17	A	A		A	A		A	A		A	A		A	A		A	A		B	B		B	B		-	A		A	A		A	A		B	B		A	A		A	A		B	B		B	B		B
CAHMR_08B22	B	B		A	A		B	B		B	B		A	A		B	B		B	B		B	B		A	A		A	A		A	A		A	A		B	B		B	B		A	A		A	A		A
AHMR_08B23	B	B		A	A		A	A		B	B		A	A		A	A		A	A		B	B		A	A		A	A		B	B		A	A		A	A		A	A		A	A		B	B		A
CAHMR_08C07	A	A		B	B		A	A		A	A		B	B		B	B		B	B		B	B		B	A		A	A		A	A		A	A		A	A		A	A		B	B		B	B		A
AHMR_08C08	B	B		B	B		B	B		B	B		A	A		B	B		B	B		B	B		A	A		B	B		A	A		A	A		A	A		B	B		A	A		A	A		B
AHMR_08C12	B	B		A	A		A	A		B	B		B	B		B	B		-	B		B	B		A	A		B	B		B	-		B	B		B	B		B	B		B	B		A	A		-
AHMR_08C17	A	A		A	A		B	B		B	B		B	B		B	B		B	B		B	B		B	B		B	B		A	A		B	B		B	B		A	A		A	A		A	A		B
AHMR_08D19	A	A		B	B		A	A		A	A		A	A		A	A		B	B		B	B		-	B		A	A		A	A		A	A		B	B		A	A		B	B		B	B		B
CAHMR_08D20	B	B		A	A		B	B		B	B		A	A		A	A		A	A		A	A		B	B		B	B		B	B		A	A		B	B		-	B		A	A		A	A		A
AHMR_08E06	A	A		A	A		A	A		B	B		A	A		A	A		B	B		B	B		B	B		B	B		B	B		A	A		A	A		B	B		B	B		B	B		A
AHMR_08E11	A	A		B	B		A	A		A	A		A	A		A	A		B	B		B	B		B	B		A	A		A	A		A	A		B	B		A	A		B	B		B	B		B
CAHMR_08E12**	A	A		A	A		B	B		B	B		B	B		A	A		A	A		A	A		B	B		A	A		A	A		A	A		A	A		A	A		B	A		B	B		A
CAHMR_08F16	A	A		A	A		B	B		B	B		A	A		B	B		B	B		A	A		A	A		A	A		A	A		A	A		B	B		B	B		A	A		B	B		B
AHMR_08G10	A	A		A	A		A	A		A	A		B	B		B	B		B	B		A	A		A	-		B	B		B	B		A	A		A	A		A	A		A	A		A	A		A
CAHMR_08G14	B	B		A	A		A	A		A	A		A	A		B	B		A	A		A	A		B	-		A	A		A	A		A	A		A	A		A	A		A	A		A	A		A
AHMR_08H04	B	B		A	A		A	A		B	B		A	A		B	B		A	A		A	A		B	B		A	A		A	A		A	A		A	A		A	A		A	A		A	A		A
CAHMR_08H09	B	B		B	B		A	A		A	A		A	A		A	A		A	A		A	A		B	B		A	A		A	A		A	A		A	A		A	A		A	A		A	A		A
AHMR_08H11	B	B		B	B		A	A		B	B		B	B		A	A		A	A		B	B		A	A		B	B		A	A		-	B		A	A		B	B		A	A		A	A		A
AHMR_08H13	B	B		A	A		A	A		B	-		A	A		B	B		B	B		A	A		B	B		B	B		B	B		A	A		A	A		A	A		A	A		A	A		A
AHMR_08H14	A	A		B	B		B	B		B	B		A	A		A	A		B	B		B	B		B	B		A	A		A	A		A	A		B	B		A	A		B	B		A	A		B
CAHMR_08I06	B	B		B	B		A	A		A	A		A	A		A	A		A	A		A	A		B	B		A	A		A	A		A	A		A	A		A	A		A	A		A	A		A
CAHMR_08I14	B	B		A	A		A	A		B	B		A	A		B	B		A	A		A	A		B	B		A	A		A	A		A	A		A	A		A	A		A	A		A	A		A
AHMR_08J04	B	B		A	A		A	A		A	A		A	A		A	A		A	A		A	A		B	B		A	A		B	B		A	A		A	A		A	A		A	A		A	A		A
AHMR_08J17	B	B		B	B		B	B		B	B		A	A		B	B		B	B		B	B		A	A		B	B		A	A		A	A		A	A		B	B		A	A		A	A		B
AHMR_08K07*******	A	A		A	A		A	A		A	A		A	A		A	A		A	A		A	A		A	A		A	A		A	A		A	A		A	A		A	A		A	A		A	A		A
AHMR_08L03	B	B		B	B		A	A		B	B		A	A		B	B		B	B		B	B		B	B		B	B		B	B		A	A		B	B		A	A		-	B		B	-		A
AHMR_08L10	A	A		B	B		B	B		B	B		A	A		A	A		B	B		B	B		B	B		A	A		A	A		A	A		B	B		A	A		A	A		B	B		B
CAHMR_08L11	A	A		B	B		A	A		A	A		B	B		B	B		B	B		B	B		A	A		A	A		A	A		A	A		A	A		A	A		B	B		B	B		A
CAHMR_08L13	B	B		B	B		A	A		A	A		A	A		A	A		A	A		A	A		B	B		A	A		A	A		A	A		A	A		A	A		A	A		A	A		A
AHMR_08M10	A	A		A	A		A	A		A	A		B	B		B	B		B	B		A	A		A	A		B	B		B	B		A	A		A	A		A	A		A	A		A	A		A
AHMR_08M14	B	B		B	B		A	A		A	A		A	A		A	A		A	A		A	A		B	B		A	A		A	A		A	A		A	A		-	A		A	A		A	A		-
AHMR_08M21*	A	A		A	A		B	B		B	B		B	B		A	A		A	A		A	A		B	B		A	A		A	A		A	A		A	A		A	A		B	B		B	B		A
CAHMR_08M22	B	B		A	A		A	A		B	B		A	A		B	B		A	A		A	A		B	B		A	A		A	A		A	A		A	A		A	A		A	A		A	A		A
AHMR_08M24	B	B		A	A		A	A		B	B		B	B		B	B		B	B		B	B		B	B		B	B		A	A		B	B		A	A		A	-		A	A		A	A		A
CAHMR_08N04	A	A		B	B		A	A		A	A		A	A		A	A		B	B		B	B		B	B		A	A		A	A		A	A		B	B		A	A		B	B		B	B		B
AHMR_08N05	-	A		B	B		A	A		B	B		B	B		A	A		A	A		B	B		A	-		B	B		B	B		B	B		-	A		B	B		A	A		B	B		A
AHMR_08N08	A	A		B	B		A	A		A	A		A	A		B	B		B	B		B	B		B	B		B	B		B	B		B	B		B	B		A	A		B	B		B	B		A
AHMR_08N24	A	A		A	A		A	A		A	A		A	A		A	A		B	B		B	B		A	A		A	A		A	A		B	B		A	A		A	A		B	B		B	B		B
CAHMR_08O04**	-	-		A	A		A	A		A	A		A	A		A	A		A	A		A	A		A	A		-	-		A	A		B	B		A	A		B	B		-	B		A	A		B
CAHMR_08O05	B	B		A	A		A	A		B	B		A	A		B	B		A	A		A	A		B	B		A	A		A	A		A	A		A	A		A	A		A	A		A	A		A
[truncated: 606 more rows]
[truncated: 13 more columns]

## Sheet: Twin data on map
Twin data on map	Isolates:	1101	1102		1103	1126		1105	1106		1109	1112		1115	1119		1132	1133		1142	1143		1154	1162		1177	1184		1196	1197		1426	1433		1429	1430		1434	1437		1435	1439		2034	2047		2035	2043
[truncated: 1,169 more rows]
[truncated: 14 more columns]
